# Supplementary material for: Sperm is epigenetically programmed to regulate gene transcription in embryos
Source: HighWire-hosted journal article supplement (doi:10.1101/gr.201541.115), 2016-03-31
Supplement: Supplemental_Table_S1.xlsx [file Supplemental_Table_S1.xlsx]

## Sheet: List of transcripts with FDR
Transcripts	logFC_Spermatid_Divided_By_Sperm	logCPM	LR	PValue	FDR	ID	FamID	PanFamily	GO	GOID	GODesc
Gjb1_GJB1_TC442449	1.04104	5.56416	108.661	1.92603e-25	3.53234e-21	Gjb1_GJB1_TC442449	PTHR11984:SF20	GAP JUNCTION BETA-1 PROTEIN (CONNEXIN 32)	GO SLIM	GO:0005243	gap junction channel activity
NA_AH010077.2	0.965002	4.39702	79.0175	6.15636e-19	5.64538e-15	NA	NA	NA	NA	NA	NA
NA_PLOD2_Taira201203_XENLA_tissue_00074828	0.875324	4.31994	68.707	1.14233e-16	6.98344e-13	NA_PLOD2_Taira201203_XENLA_tissue_00074828	PTHR10730	PROCOLLAGEN-LYSINE,2-OXOGLUTARATE 5-DIOXYGENASE/GLYCOSYLTRANSFERASE 25 FAMILY MEMBER	GO SLIM	GO:0007155	cell adhesion
NA_CPEB1_XeXenL6RMv10039223m	0.801491	4.45089	47.6336	5.13797e-12	2.35576e-08	NA_CPEB1_XeXenL6RMv10039223m	PTHR12566	CYTOPLASMIC POLYADENYLATION ELEMENT BINDING PROTEIN (CPEB)	GO SLIM	GO:0003676	nucleic acid binding
Cpeb1_CPEB1_TC415268	0.785419	4.61383	45.9907	1.18818e-11	4.35825e-08	Cpeb1_CPEB1_TC415268	PTHR12566	CYTOPLASMIC POLYADENYLATION ELEMENT BINDING PROTEIN (CPEB)	GO SLIM	GO:0003676	nucleic acid binding
NA_SFRP2_Ismailoglu201203_XENLA_00042592	0.627171	4.99587	43.9658	3.34172e-11	1.02145e-07	NA	NA	NA	NA	NA	NA
Car7_CA7_TeperekTkacz201202_XENLA_00075957	0.715593	3.26296	43.5793	4.07123e-11	1.06666e-07	Car7_CA7_TeperekTkacz201202_XENLA_00075957	PTHR18952:SF26	CARBONIC ANHYDRASE VII (CARBONATE DEHYDRATASE VII)	GO SLIM	GO:0016829	lyase activity
NA_BC044072.1	0.730192	3.77243	39.6947	2.9693e-10	6.80712e-07	NA_BC044072.1	PTHR11412:SF36	ALPHA-MACROGLOBULIN	GO SLIM	GO:0004867	serine-type endopeptidase inhibitor activity
Fosl2_FOSL2_Taira201203_XENLA_tissue_00235780	0.663919	3.33399	38.8446	4.58915e-10	8.4331e-07	Fosl2_FOSL2_Taira201203_XENLA_tissue_00235780	PTHR23351	FOS TRANSCRIPTION FACTOR-RELATED	GO SLIM	GO:0003676	nucleic acid binding
Socs3_SOCS3_Taira201203_XENLA_tissue_00286385	0.656792	3.77054	38.8408	4.5982e-10	8.4331e-07	Socs3_SOCS3_Taira201203_XENLA_tissue_00286385	PTHR10385	SUPPRESSOR OF CYTOKINE SIGNALING	GO SLIM	GO:0005125	cytokine activity
NA_FOS_Taira201203_XENLA_tissue_00143512	0.636534	3.53042	38.0677	6.83334e-10	1.1393e-06	NA_FOS_Taira201203_XENLA_tissue_00143512	PTHR23351	FOS TRANSCRIPTION FACTOR-RELATED	GO SLIM	GO:0003676	nucleic acid binding
NA_GJB2_Taira201203_XENLA_stage_00124664	0.553681	6.62328	36.8712	1.26199e-09	1.92874e-06	NA_GJB2_Taira201203_XENLA_stage_00124664	PTHR11984:SF25	GB DEF: GAP JUNCTION BETA-6 PROTEIN (CONNEXIN 31) (CX31)	GO SLIM	GO:0005243	gap junction channel activity
NA_SFRP2_Ismailoglu201203_XENLA_00017150	0.560283	5.47949	36.3948	1.61135e-09	2.27325e-06	NA	NA	NA	NA	NA	NA
NA_C19ORF26_TeperekTkacz201202_XENLA_00119152	-0.652593	2.79179	35.5745	2.45483e-09	3.21582e-06	NA	NA	NA	NA	NA	NA
NA_NT5M_Quigley201207_XENLA_00091072	0.680336	2.51541	35.2719	2.86735e-09	3.50581e-06	NA	NA	NA	NA	NA	NA
NA_NT5M_TeperekTkacz201206_XENLA_00132601	0.708268	2.04457	34.1122	5.20236e-09	5.9632e-06	NA	NA	NA	NA	NA	NA
NA_KRT_TeperekTkacz201206_XENLA_00049303	0.56893	5.99006	33.958	5.6315e-09	6.07539e-06	NA_KRT_TeperekTkacz201206_XENLA_00049303	PTHR23239	INTERMEDIATE FILAMENT	GO SLIM	GO:0005200	structural constituent of cytoskeleton
NA_NDUFA8_Quigley201207_XENLA_00017558	0.638625	2.87207	33.2679	8.0299e-09	7.78981e-06	NA_NDUFA8_Quigley201207_XENLA_00017558	PTHR13344	NADH-UBIQUINONE OXIDOREDUCTASE	GO SLIM	GO:0016491	oxidoreductase activity
Fos_FOS_XeXenL6RMv10027632m	0.594285	3.51266	33.2581	8.07014e-09	7.78981e-06	Fos_FOS_XeXenL6RMv10027632m	PTHR23351	FOS TRANSCRIPTION FACTOR-RELATED	GO SLIM	GO:0003676	nucleic acid binding
Pgam1_NM_001091527.1	0.638421	2.95533	31.6001	1.89419e-08	1.73697e-05	Pgam1_NM_001091527.1	PTHR11931	PHOSPHOGLYCERATE MUTASE	GO SLIM	GO:0016853	isomerase activity
Lamb1_LAMB1_Taira201203_XENLA_stage_00035701	0.525983	5.29125	31.0966	2.45497e-08	2.14401e-05	Lamb1_LAMB1_Taira201203_XENLA_stage_00035701	PTHR24661:SF37	SUBFAMILY NOT NAMED	GO SLIM	GO:0004872	receptor activity
NA_HES1_TC421852	0.653084	2.266	30.638	3.10951e-08	2.5922e-05	NA_HES1_TC421852	PTHR10985	BASIC HELIX-LOOP-HELIX TRANSCRIPTION FACTOR, HES-RELATED	GO SLIM	GO:0003676	nucleic acid binding
Mtap_MTAP_XeXenL6RMv10027314m	0.630379	2.38768	30.1786	3.94036e-08	3.14201e-05	Mtap_MTAP_XeXenL6RMv10027314m	PTHR11904	METHYLTHIOADENOSINE/PURINE NUCLEOSIDE PHOSPHORYLASE	GO SLIM	GO:0016740	transferase activity
NA_B0BMG0_XENTR_Taira201203_XENLA_tissue_00042092	0.636958	2.39941	30.0899	4.12483e-08	3.15206e-05	NA_B0BMG0_XENTR_Taira201203_XENLA_tissue_00042092	PTHR10194	RAS GTPASE-ACTIVATING PROTEINS	GO SLIM	GO:0005083	small GTPase regulator activity
NA_KRT_XeXenL6RMv10001064m	0.544712	4.64586	29.599	5.3131e-08	3.89769e-05	NA_KRT_XeXenL6RMv10001064m	PTHR23239	INTERMEDIATE FILAMENT	GO SLIM	GO:0005200	structural constituent of cytoskeleton
NA_M11940.1	0.563985	4.79926	29.0611	7.01323e-08	4.94702e-05	NA_M11940.1	PTHR23239	INTERMEDIATE FILAMENT	GO SLIM	GO:0005200	structural constituent of cytoskeleton
NA_HES1_Park201106_XENLA_00070357	0.519021	4.44585	28.5072	9.33491e-08	6.34082e-05	NA_HES1_Park201106_XENLA_00070357	PTHR10985	BASIC HELIX-LOOP-HELIX TRANSCRIPTION FACTOR, HES-RELATED	GO SLIM	GO:0003676	nucleic acid binding
NA_NM_001090383.1	0.54787	4.24038	28.0592	1.17658e-07	7.56228e-05	NA_NM_001090383.1	PTHR10129:SF10	TRANSCRIPTION FACTOR MAFB	GO SLIM	GO:0003676	nucleic acid binding
Abcc5_NM_001096615.1	0.727449	1.61641	28.0279	1.19578e-07	7.56228e-05	Abcc5_NM_001096615.1	PTHR25912	FAMILY NOT NAMED	GO SLIM	GO:0006810	transport
NA_NM_001087625.1	-0.490418	5.27495	27.557	1.5253e-07	9.32467e-05	NA	NA	NA	NA	NA	NA
NA_B2RZ03_XENTR_Ismailoglu201203_XENLA_00027801	0.615506	4.48743	27.4717	1.59412e-07	9.43101e-05	NA	NA	NA	NA	NA	NA
NA_NM_001088706.1	0.534561	3.48901	26.9176	2.12317e-07	0.000121684	NA_NM_001088706.1	PTHR10985	BASIC HELIX-LOOP-HELIX TRANSCRIPTION FACTOR, HES-RELATED	GO SLIM	GO:0003676	nucleic acid binding
Hes1_BC054333.1	0.494923	4.65787	26.7785	2.28157e-07	0.0001268	NA	NA	NA	NA	NA	NA
Mmrn2_MMRN2_Taira201203_XENLA_tissue_00243195	0.607017	2.25081	26.2932	2.93321e-07	0.000158221	Mmrn2_MMRN2_Taira201203_XENLA_tissue_00243195	PTHR15427	EMILIN (ELASTIN MICROFIBRIL INTERFACE-LOCATED PROTEIN) (ELASTIN MICROFIBRIL INTERFACER)	GO SLIM	GO:0007155	cell adhesion
NA_GATA3_Taira201203_XENLA_tissue_00212153	0.525062	3.41565	25.4527	4.53359e-07	0.000232585	NA_GATA3_Taira201203_XENLA_tissue_00212153	PTHR10071	TRANSCRIPTION FACTOR GATA (GATA BINDING FACTOR)	GO SLIM	GO:0003676	nucleic acid binding
NA_NA_Taira201203_XENLA_stage_00000768	0.542173	2.92813	25.4392	4.56547e-07	0.000232585	NA	NA	NA	NA	NA	NA
Casp9_NM_001085566.1	0.624214	1.77455	25.128	5.36484e-07	0.000265922	Casp9_NM_001085566.1	PTHR10454:SF19	CASPASE-9	GO SLIM	GO:0016787	hydrolase activity
NA_NA_TC446730	0.553644	2.59875	24.9027	6.02966e-07	0.00029101	NA_NA_TC446730	PTHR12635	RHO-GTPASE-ACTIVATING PROTEIN 6	GO SLIM	GO:0005198	structural molecule activity
NA_NA_Quigley201112_XENLA_00000928	0.490658	4.73184	24.1763	8.79057e-07	0.00040416	NA_NA_Quigley201112_XENLA_00000928	PTHR11610	LIPASE	GO SLIM	GO:0016787	hydrolase activity
NA_SLC23A2_TeperekTkacz201202_XENLA_00117834	0.561869	2.41428	24.171	8.81482e-07	0.00040416	NA_SLC23A2_TeperekTkacz201202_XENLA_00117834	PTHR11119	XANTHINE-URACIL / VITAMIN C PERMEASE FAMILY MEMBER	GO SLIM	GO:0022857	transmembrane transporter activity
Pgam1_PGAM1_Taira201203_XENLA_stage_00074092	0.502878	4.1215	24.044	9.41607e-07	0.000421197	Pgam1_PGAM1_Taira201203_XENLA_stage_00074092	PTHR11931	PHOSPHOGLYCERATE MUTASE	GO SLIM	GO:0016853	isomerase activity
NA_NM_001096070.1	-0.487466	3.71746	23.9778	9.74519e-07	0.00042554	NA_NM_001096070.1	PTHR24377	FAMILY NOT NAMED	GO SLIM	GO:0003676	nucleic acid binding
NA_XB-GENE-5897454_TeperekTkacz201206_XENLA_00013361	0.505853	4.10573	23.846	1.04356e-06	0.000445092	NA_XB-GENE-5897454_TeperekTkacz201206_XENLA_00013361	PTHR11339:SF43	ZONADHESIN	GO SLIM	GO:0009566	fertilization
NA_STMN1_TC434563	0.513215	3.97938	23.596	1.18834e-06	0.000495323	NA_STMN1_TC434563	PTHR10104	STATHMIN	GO SLIM	GO:0007154	cell communication
NA_NM_001089073.1	0.444486	6.01941	23.3364	1.36004e-06	0.000554292	NA_NM_001089073.1	PTHR22972	SERINE/THREONINE PROTEIN KINASE	GO SLIM	GO:0004675	transmembrane receptor protein serine/threonine kinase activity
NA_HES7.1_Taira201203_XENLA_stage_00017246	0.497093	3.35865	22.9084	1.69905e-06	0.000667898	NA_HES7.1_Taira201203_XENLA_stage_00017246	PTHR10985	BASIC HELIX-LOOP-HELIX TRANSCRIPTION FACTOR, HES-RELATED	GO SLIM	GO:0003676	nucleic acid binding
NA_NA_TeperekTkacz201206_XENLA_00127873	0.468281	4.23495	22.8943	1.71162e-06	0.000667898	NA	NA	NA	NA	NA	NA
Agrn_AGRN_Taira201203_XENLA_tissue_00124619	0.543744	2.529	22.7322	1.8622e-06	0.000711514	NA	NA	NA	NA	NA	NA
Cebpa_NM_001091687.1	0.497394	3.6833	22.6049	1.98974e-06	0.000738729	Cebpa_NM_001091687.1	PTHR23334	CCAAT/ENHANCER BINDING PROTEIN	GO SLIM	GO:0003676	nucleic acid binding
NA_NA_Horb201201_XENLA_00161253	0.511624	4.36802	22.5817	2.01398e-06	0.000738729	NA_NA_Horb201201_XENLA_00161253	PTHR11339:SF43	ZONADHESIN	GO SLIM	GO:0009566	fertilization
NA_TRIM71_Ismailoglu201203_XENLA_00058596	0.462478	4.17826	22.3218	2.30579e-06	0.00082918	NA_TRIM71_Ismailoglu201203_XENLA_00058596	PTHR24103:SF5	SUBFAMILY NOT NAMED	GO SLIM	GO:0016874	ligase activity
NA_DARMIN_TeperekTkacz201206_XENLA_00081109	0.444344	5.12447	22.1564	2.51315e-06	0.000885309	NA_DARMIN_TeperekTkacz201206_XENLA_00081109	PTHR11014	PEPTIDASE M20 FAMILY MEMBER	GO SLIM	GO:0016787	hydrolase activity
NA_CD99L2_Taira201203_XENLA_tissue_00249233	-0.453147	4.66519	22.1221	2.55842e-06	0.000885309	NA	NA	NA	NA	NA	NA
Aldh2_ALDH2_Kwon201107_XENLA_00098201	0.529522	2.90447	21.4805	3.57448e-06	0.001214	Aldh2_ALDH2_Kwon201107_XENLA_00098201	PTHR11699	ALDEHYDE DEHYDROGENASE-RELATED	GO SLIM	GO:0016491	oxidoreductase activity
March8_NM_001094772.1	0.42186	6.76222	21.2361	4.06054e-06	0.00135401	March8_NM_001094772.1	PTHR23012:SF7	MEMBRANE ASSOCIATED RING FINGER 1,8	GO SLIM	GO:0016874	ligase activity
Tmem19_TMEM19_Taira201203_XENLA_tissue_00284527	0.57669	1.7303	21.179	4.18317e-06	0.00136999	NA	NA	NA	NA	NA	NA
Clcn2_CLCN2_Taira201203_XENLA_tissue_00146000	0.609314	1.6233	21.0025	4.58685e-06	0.00147584	Clcn2_CLCN2_Taira201203_XENLA_tissue_00146000	PTHR11689	CHLORIDE CHANNEL	GO SLIM	GO:0005216	ion channel activity
Cd99l2_CD99L2_Taira201203_XENLA_tissue_00200688	-0.4368	4.87135	20.9071	4.82113e-06	0.00152447	NA	NA	NA	NA	NA	NA
NA_NM_001092571.1	0.606809	1.3883	20.765	5.19228e-06	0.00161401	NA_NM_001092571.1	PTHR11063	GLUTAMATE SEMIALDEHYDE DEHYDROGENASE	GO SLIM	GO:0016491	oxidoreductase activity
NA_FOSL2_Quigley201112_XENLA_00079851	0.518429	2.42465	20.6141	5.61811e-06	0.00171727	NA_FOSL2_Quigley201112_XENLA_00079851	PTHR23351	FOS TRANSCRIPTION FACTOR-RELATED	GO SLIM	GO:0003676	nucleic acid binding
NA_MN1_Park201106_XENLA_00072263	0.488424	3.14692	20.4436	6.14157e-06	0.0018465	NA	NA	NA	NA	NA	NA
NA_BTG2_Taira201203_XENLA_stage_00047238	0.46096	3.89057	20.3309	6.51391e-06	0.00192686	NA_BTG2_Taira201203_XENLA_stage_00047238	PTHR22978:SF14	BTG FAMILY, MEMBER 2	GO SLIM	GO:0007242	intracellular signaling cascade
Dsel_DSEL_XeXenL6RMv10012021m	0.590202	1.57275	20.2294	6.86888e-06	0.00198991	NA	NA	NA	NA	NA	NA
Gata3_NM_001090866.1	0.470794	3.355	20.2086	6.94408e-06	0.00198991	Gata3_NM_001090866.1	PTHR10071	TRANSCRIPTION FACTOR GATA (GATA BINDING FACTOR)	GO SLIM	GO:0003676	nucleic acid binding
NA_HES1_Quigley201207_XENLA_00083872	0.489541	2.86883	20.0289	7.62816e-06	0.00213365	NA_HES1_Quigley201207_XENLA_00083872	PTHR10985	BASIC HELIX-LOOP-HELIX TRANSCRIPTION FACTOR, HES-RELATED	GO SLIM	GO:0003676	nucleic acid binding
NA_AJ009290.1	0.425412	5.50489	20.0163	7.67834e-06	0.00213365	NA	NA	NA	NA	NA	NA
NA_STX19_Taira201203_XENLA_tissue_00235164	-0.424444	4.48651	19.981	7.82163e-06	0.00214103	NA_STX19_Taira201203_XENLA_tissue_00235164	PTHR19957:SF29	SYNTAXIN-RELATED	GO SLIM	GO:0005515	protein binding
NA_JUND_Taira201203_XENLA_stage_00028201	0.499919	2.67084	19.8273	8.4764e-06	0.00228614	NA_JUND_Taira201203_XENLA_stage_00028201	PTHR11462	JUN TRANSCRIPTION FACTOR-RELATED	GO SLIM	GO:0003676	nucleic acid binding
Sema6a_SEMA6A_Audic201207_XENLA_00002860	0.42106	4.69782	19.7807	8.68556e-06	0.0023086	Sema6a_SEMA6A_Audic201207_XENLA_00002860	PTHR11036	SEMAPHORIN	GO SLIM	GO:0005515	protein binding
Rbl2_RBL2_Taira201203_XENLA_tissue_00253571	0.457904	3.84411	19.6224	9.43545e-06	0.00244406	Rbl2_RBL2_Taira201203_XENLA_tissue_00253571	PTHR13742:SF8	RETINOBLASTOMA-LIKE PROTEIN 2 (130 KDA RETINOBLASTOMA-ASSOCIATED PROTEIN) (P130) (RBR-2)	GO SLIM	GO:0003676	nucleic acid binding
NA_NM_001130950.1	0.406315	5.8041	19.6171	9.46174e-06	0.00244406	NA_NM_001130950.1	PTHR19143:SF51	SUBFAMILY NOT NAMED	GO SLIM	GO:0005515	protein binding
NA_CER1_Taira201203_XENLA_stage_00197476	0.416191	6.04437	19.5878	9.60832e-06	0.00244745	NA	NA	NA	NA	NA	NA
NA_AY757358.1	0.494881	2.74577	19.5037	1.00407e-05	0.00252254	NA_AY757358.1	PTHR24329:SF72	SUBFAMILY NOT NAMED	GO SLIM	GO:0003676	nucleic acid binding
NA_NM_001090691.1	0.40934	5.31657	19.4691	1.02242e-05	0.00252762	NA	NA	NA	NA	NA	NA
NA_NM_001091189.1	-0.408858	5.10873	19.4319	1.04252e-05	0.00252762	NA_NM_001091189.1	PTHR19957:SF29	SYNTAXIN-RELATED	GO SLIM	GO:0005515	protein binding
NA_DQ096859.1	0.45098	3.87374	19.4229	1.04743e-05	0.00252762	NA_DQ096859.1	PTHR22978:SF14	BTG FAMILY, MEMBER 2	GO SLIM	GO:0007242	intracellular signaling cascade
NA_BC087499.1	0.449559	3.8725	19.2973	1.11866e-05	0.00266443	NA_BC087499.1	PTHR22978:SF14	BTG FAMILY, MEMBER 2	GO SLIM	GO:0007242	intracellular signaling cascade
NA_SOX21_Taira201203_XENLA_tissue_00192034	-0.493086	2.61356	19.183	1.18769e-05	0.0027926	NA_SOX21_Taira201203_XENLA_tissue_00192034	PTHR10270	SOX TRANSCRIPTION FACTOR	GO SLIM	GO:0003676	nucleic acid binding
NA_SZL_XeXenL6RMv10032241m	-0.424337	4.55791	19.0333	1.2846e-05	0.00298222	NA_SZL_XeXenL6RMv10032241m	PTHR11309:SF11	SECRETED XWNT8 INHIBITOR SIZZLED-RELATED	GO SLIM	GO:0005515	protein binding
NA_NM_001088556.1	0.401171	5.78407	18.9653	1.33118e-05	0.00305173	NA_NM_001088556.1	PTHR11309:SF12	WNT INHIBITOR FRZB2	GO SLIM	GO:0005515	protein binding
NA_BC099357.1	-0.453912	3.02845	18.8843	1.38892e-05	0.00314479	NA	NA	NA	NA	NA	NA
NA_TES_XeXenL6RMv10000623m	0.560288	1.46597	18.842	1.42002e-05	0.00317599	NA	NA	NA	NA	NA	NA
Tbx3_NM_001087933.1	0.501057	2.6305	18.8013	1.45069e-05	0.00320551	Tbx3_NM_001087933.1	PTHR11267	T-BOX PROTEIN-RELATED	GO SLIM	GO:0003676	nucleic acid binding
Lama1_LAMA1_Amin201106_XENLA_00003444	0.49158	2.89299	18.7465	1.49294e-05	0.00325958	NA	NA	NA	NA	NA	NA
NA_NM_001086806.1	0.423195	4.1625	18.696	1.53305e-05	0.00330779	NA_NM_001086806.1	PTHR23334	CCAAT/ENHANCER BINDING PROTEIN	GO SLIM	GO:0003676	nucleic acid binding
NA_XB-GENE-5895314_Taira201203_XENLA_stage_00007898	-0.423342	4.18625	18.6354	1.58251e-05	0.0033748	NA_XB-GENE-5895314_Taira201203_XENLA_stage_00007898	PTHR24103:SF74	SUBFAMILY NOT NAMED	GO SLIM	GO:0016874	ligase activity
NA_AY112700.1	-0.4263	3.78004	18.5831	1.62654e-05	0.00342883	NA_AY112700.1	PTHR10605	HEPARAN SULFATE 3-O SULFOTRANSFERASE	GO SLIM	GO:0016740	transferase activity
NA_NIF_Taira201203_XENLA_stage_00073688	-0.452651	3.23561	18.5557	1.65009e-05	0.00343894	NA_NIF_Taira201203_XENLA_stage_00073688	PTHR23239	INTERMEDIATE FILAMENT	GO SLIM	GO:0005200	structural constituent of cytoskeleton
NA_BC130190.1	0.498576	2.39462	18.4531	1.7414e-05	0.00358846	NA	NA	NA	NA	NA	NA
NA_DEDD2_Quigley201112_XENLA_00039209	0.545874	1.47891	18.4299	1.76269e-05	0.00359198	NA	NA	NA	NA	NA	NA
NA_FOSL2_Kwon201107_XENLA_00078674	0.49504	2.53765	18.3146	1.87265e-05	0.00377411	NA_FOSL2_Kwon201107_XENLA_00078674	PTHR23351	FOS TRANSCRIPTION FACTOR-RELATED	GO SLIM	GO:0003676	nucleic acid binding
NA_DHH_Ismailoglu201203_XENLA_00066372	0.452883	3.02472	18.0688	2.13069e-05	0.00424749	NA_DHH_Ismailoglu201203_XENLA_00066372	PTHR11889	HEDGEHOG	GO SLIM	GO:0016787	hydrolase activity
NA_NDUFA8_Ismailoglu201203_XENLA_00021702	0.41635	4.29691	17.9148	2.31022e-05	0.00455585	NA_NDUFA8_Ismailoglu201203_XENLA_00021702	PTHR13344	NADH-UBIQUINONE OXIDOREDUCTASE	GO SLIM	GO:0016491	oxidoreductase activity
Psat1_PSAT1_Taira201203_XENLA_stage_00185773	0.481766	2.50875	17.8921	2.33794e-05	0.00456148	Psat1_PSAT1_Taira201203_XENLA_stage_00185773	PTHR21152:SF1	PHOSPHOSERINE AMINOTRANSFERASE	GO SLIM	GO:0008483	transaminase activity
Stmn1_NM_001087203.1	0.434435	4.42868	17.8247	2.42224e-05	0.00467619	Stmn1_NM_001087203.1	PTHR10104	STATHMIN	GO SLIM	GO:0007154	cell communication
NA_BC041714.1	0.413249	4.12429	17.7534	2.51471e-05	0.00480414	NA_BC041714.1	PTHR23334	CCAAT/ENHANCER BINDING PROTEIN	GO SLIM	GO:0003676	nucleic acid binding
Pik3r3_PIK3R3_Taira201203_XENLA_stage_00143968	0.41308	4.152	17.6983	2.5886e-05	0.00489433	Pik3r3_PIK3R3_Taira201203_XENLA_stage_00143968	PTHR10155	PHOSPHATIDYLINOSITOL 3-KINASE REGULATORY SUBUNIT	GO SLIM	GO:0005515	protein binding
Hs3st1_HS3ST1_Taira201203_XENLA_stage_00203768	-0.418801	3.63862	17.6622	2.63815e-05	0.0049371	Hs3st1_HS3ST1_Taira201203_XENLA_stage_00203768	PTHR10605	HEPARAN SULFATE 3-O SULFOTRANSFERASE	GO SLIM	GO:0016740	transferase activity
Plaur_PLAUR_Taira201203_XENLA_tissue_00281787	0.428609	3.90961	17.5953	2.7327e-05	0.00506239	NA	NA	NA	NA	NA	NA
Abcc5_NP_001096447.1_Taira201203_XENLA_tissue_00163778	0.491586	2.58468	17.5726	2.76539e-05	0.00507173	Abcc5_NP_001096447.1_Taira201203_XENLA_tissue_00163778	PTHR24223:SF10	SUBFAMILY NOT NAMED	GO SLIM	GO:0016787	hydrolase activity
NA_OTX2_XeXenL6RMv10009265m	0.387252	5.50605	17.5472	2.8027e-05	0.00508925	NA	NA	NA	NA	NA	NA
NA_MARCH8_Ismailoglu201203_XENLA_00024521	0.380829	7.24948	17.5245	2.83626e-05	0.00509971	NA_MARCH8_Ismailoglu201203_XENLA_00024521	PTHR23012:SF7	MEMBRANE ASSOCIATED RING FINGER 1,8	GO SLIM	GO:0016874	ligase activity
Fam83b_FAM83B_Taira201203_XENLA_tissue_00190021	-0.401331	4.2896	17.5007	2.87196e-05	0.00511376	NA	NA	NA	NA	NA	NA
NA_NA_Taira201203_XENLA_stage_00119658	0.392972	5.19588	17.4159	3.00305e-05	0.00527847	NA	NA	NA	NA	NA	NA
Plbd2_PLBD2_Taira201203_XENLA_tissue_00238408	0.442054	2.99987	17.4039	3.02203e-05	0.00527847	NA	NA	NA	NA	NA	NA
NA_MARCH8_Taira201203_XENLA_tissue_00292001	0.380533	6.82092	17.3675	3.08052e-05	0.00532989	NA_MARCH8_Taira201203_XENLA_tissue_00292001	PTHR23012:SF7	MEMBRANE ASSOCIATED RING FINGER 1,8	GO SLIM	GO:0016874	ligase activity
NA_HAO1_Ismailoglu201203_XENLA_00048104	0.390785	5.24597	17.318	3.16183e-05	0.00541943	NA_HAO1_Ismailoglu201203_XENLA_00048104	PTHR10578	(S)-2-HYDROXY-ACID OXIDASE-RELATED	GO SLIM	GO:0016874	ligase activity
Mafb_MAFB_Taira201203_XENLA_tissue_00222808	0.451383	3.35228	17.2514	3.27453e-05	0.00556064	Mafb_MAFB_Taira201203_XENLA_tissue_00222808	PTHR10129:SF10	TRANSCRIPTION FACTOR MAFB	GO SLIM	GO:0003676	nucleic acid binding
Slc7a5_NM_001090065.1	0.441034	3.60731	17.0858	3.57293e-05	0.00601169	Slc7a5_NM_001090065.1	PTHR11785:SF74	CATIONIC AMINO ACID TRANSPORTER SLC7A11	GO SLIM	GO:0022857	transmembrane transporter activity
Lrrc40_LRRC40_Taira201203_XENLA_tissue_00148197	0.50372	2.15996	16.9552	3.82716e-05	0.00638093	Lrrc40_LRRC40_Taira201203_XENLA_tissue_00148197	PTHR23155:SF28	LEUCINE-RICH REPEAT-CONTAINING PROTEIN	GO SLIM	GO:0002376	immune system process
Gch1_GCH1_Taira201203_XENLA_tissue_00127764	0.550784	1.34957	16.7987	4.1561e-05	0.00686692	Gch1_GCH1_Taira201203_XENLA_tissue_00127764	PTHR11109	GTP CYCLOHYDROLASE I	GO SLIM	GO:0016787	hydrolase activity
NA_NF1_XeXenL6RMv10010215m	0.503264	1.60908	16.6967	4.38564e-05	0.00718149	NA_NF1_XeXenL6RMv10010215m	PTHR10194	RAS GTPASE-ACTIVATING PROTEINS	GO SLIM	GO:0005083	small GTPase regulator activity
NA_D31760.1	0.483384	2.06946	16.5418	4.75896e-05	0.00772384	NA_D31760.1	PTHR26391	FAMILY NOT NAMED	GO SLIM	GO:0016740	transferase activity
Cdkn1a_NM_001094464.1	0.46285	2.66668	16.4157	5.08628e-05	0.00807911	Cdkn1a_NM_001094464.1	PTHR10265	CYCLIN-DEPENDENT KINASE INHIBITOR 1	GO SLIM	GO:0019210	kinase inhibitor activity
NA_SLC13A3_Taira201203_XENLA_stage_00156612	0.446531	2.73295	16.4089	5.10457e-05	0.00807911	NA_SLC13A3_Taira201203_XENLA_stage_00156612	PTHR10283	SOLUTE CARRIER FAMILY 13 MEMBER	GO SLIM	GO:0022857	transmembrane transporter activity
NA_BC068970.1	0.368823	7.09411	16.4069	5.11002e-05	0.00807911	NA_BC068970.1	PTHR10812	TRANSCRIPTION FACTOR AP-2	GO SLIM	GO:0003676	nucleic acid binding
NA_STMN1_Taira201203_XENLA_tissue_00041903	0.433751	3.47553	16.3483	5.27047e-05	0.00826158	NA_STMN1_Taira201203_XENLA_tissue_00041903	PTHR10104	STATHMIN	GO SLIM	GO:0007154	cell communication
Klhl24_KLHL24_Kwon201107_XENLA_00111234	-0.439759	2.66301	16.2546	5.53745e-05	0.00860651	NA	NA	NA	NA	NA	NA
NA_CHD3_Ismailoglu201203_XENLA_00000455	-0.362271	7.04867	16.2161	5.65119e-05	0.00870948	NA_CHD3_Ismailoglu201203_XENLA_00000455	PTHR10799	SWI/SNF-RELATED MATRIX-ASSOCIATED ACTIN-DEPENDENT REGULATOR OF CHROMATIN SUBFAMILY-RELATED	GO SLIM	GO:0003678	DNA helicase activity
NA_NCEH1_Park201106_XENLA_00123845	-0.513361	2.10772	16.1908	5.7272e-05	0.00875308	NA	NA	NA	NA	NA	NA
NA_NA_Taira201203_XENLA_stage_00029115	0.372535	5.57501	16.0901	6.03989e-05	0.00915468	NA_NA_Taira201203_XENLA_stage_00029115	PTHR15282	POTASSIUM VOLTAGE-GATED CHANNEL SUBFAMILY E MEMBER 1, 3	GO SLIM	GO:0005261	cation channel activity
NA_AF549892.1	0.39497	4.06585	16.0711	6.1009e-05	0.00917136	NA	NA	NA	NA	NA	NA
NA_LFNG_Audic201207_XENLA_00002214	0.377136	4.75654	15.9987	6.33858e-05	0.00945118	NA_LFNG_Audic201207_XENLA_00002214	PTHR10811	FRINGE-RELATED	GO SLIM	GO:0016740	transferase activity
Txndc9_TXNDC9_TeperekTkacz201202_XENLA_00124375	0.399793	3.83839	15.9692	6.43812e-05	0.00952218	Txndc9_TXNDC9_TeperekTkacz201202_XENLA_00124375	PTHR21148:SF11	THIOREDOXIN DOMAIN CONTAINING PROTEIN 9-RELATED	GO SLIM	GO:0007067	mitosis
Nt5c3_NM_001094563.1	0.429914	3.19882	15.9378	6.54592e-05	0.00960417	Nt5c3_NM_001094563.1	PTHR13045	NT5C3 HYDROLASE	GO SLIM	GO:0016787	hydrolase activity
Olfm4_OLFM4_Quigley201112_XENLA_00066091	0.389248	4.09799	15.836	6.90769e-05	0.0100545	Olfm4_OLFM4_Quigley201112_XENLA_00066091	PTHR23192:SF7	TIARIN	GO SLIM	GO:0004872	receptor activity
NA_ROBO3_Taira201203_XENLA_tissue_00093443	0.456192	2.30369	15.7126	7.37304e-05	0.0105533	NA_ROBO3_Taira201203_XENLA_tissue_00093443	PTHR10489	CELL ADHESION MOLECULE	GO SLIM	GO:0007154	cell communication
NA_RHOG.2_Ismailoglu201203_XENLA_00028496	0.403075	3.35181	15.7031	7.41038e-05	0.0105533	NA	NA	NA	NA	NA	NA
Pkdcc_PKDCC.2_Quigley201112_XENLA_00017357	0.404944	3.68527	15.6874	7.4719e-05	0.0105533	NA	NA	NA	NA	NA	NA
NA_BC077870.1	0.478882	2.40521	15.6853	7.48052e-05	0.0105533	NA_BC077870.1	PTHR10201	MATRIX METALLOPROTEINASE	GO SLIM	GO:0016787	hydrolase activity
NA_MN1_XeXenL6RMv10006960m	0.414262	3.38927	15.6646	7.56281e-05	0.0105879	NA	NA	NA	NA	NA	NA
NA_BLVRB_Taira201203_XENLA_stage_00169730	0.494979	2.06323	15.6013	7.81998e-05	0.010865	NA_BLVRB_Taira201203_XENLA_stage_00169730	PTHR15020:SF8	FLAVIN REDUCTASE (NADPH-DEPENDENT DIAPHORASE)	GO SLIM	GO:0016491	oxidoreductase activity
Foxa2_FOXA2_Quigley201112_XENLA_00082222	0.376768	4.739	15.4146	8.63201e-05	0.0119031	Foxa2_FOXA2_Quigley201112_XENLA_00082222	PTHR11829	FAMILY NOT NAMED	GO SLIM	GO:0003676	nucleic acid binding
Sh2d3c_NM_001086827.1	-0.385953	3.8145	15.3635	8.8683e-05	0.0121184	Sh2d3c_NM_001086827.1	PTHR14247:SF6	SUBFAMILY NOT NAMED	GO SLIM	GO:0007154	cell communication
NA_AJ009291.1	0.390204	4.53086	15.3364	8.99645e-05	0.0121184	NA	NA	NA	NA	NA	NA
NA_BC092021.1	0.445052	2.62326	15.323	9.06078e-05	0.0121184	NA_BC092021.1	PTHR11848	TGF-BETA FAMILY	GO SLIM	GO:0005515	protein binding
NA_FAM46C_XeXenL6RMv10040501m	-0.351525	7.03329	15.3214	9.06821e-05	0.0121184	NA	NA	NA	NA	NA	NA
NA_MARS2_Horb201201_XENLA_00089909	0.355347	7.42457	15.311	9.11856e-05	0.0121184	NA_MARS2_Horb201201_XENLA_00089909	PTHR11946	ISOLEUCYL, LEUCYL, TYROSYL, VALYL AND METHIONYL-TRNA SYNTHETASES	GO SLIM	GO:0016874	ligase activity
NA_FRZB2_Ismailoglu201203_XENLA_00013289	0.405487	3.53275	15.2929	9.20601e-05	0.0121466	NA_FRZB2_Ismailoglu201203_XENLA_00013289	PTHR11309:SF12	WNT INHIBITOR FRZB2	GO SLIM	GO:0005515	protein binding
NA_BIX1.2_TC420565	-0.405383	3.46844	15.252	9.40793e-05	0.0123051	NA_BIX1.2_TC420565	PTHR24326:SF76	SUBFAMILY NOT NAMED	GO SLIM	GO:0003676	nucleic acid binding
Alg2_ALG2_Audic201207_XENLA_00001739	0.378361	4.07301	15.2415	9.46031e-05	0.0123051	Alg2_ALG2_Audic201207_XENLA_00001739	PTHR12526:SF22	ALPHA-1,3-MANNOSYLTRANSFERASE	GO SLIM	GO:0016740	transferase activity
Fat1_FAT1_Taira201203_XENLA_tissue_00017935	0.364714	5.05696	15.2106	9.61619e-05	0.0124198	Fat1_FAT1_Taira201203_XENLA_tissue_00017935	PTHR24027:SF76	SUBFAMILY NOT NAMED	GO SLIM	GO:0005509	calcium ion binding
NA_NA_Taira201203_XENLA_stage_00034511	0.391984	3.54813	15.1844	9.75062e-05	0.0125053	NA_NA_Taira201203_XENLA_stage_00034511	PTHR12635	RHO-GTPASE-ACTIVATING PROTEIN 6	GO SLIM	GO:0005198	structural molecule activity
Gata2_NM_001090574.1	0.352323	7.03556	15.1046	0.000101715	0.0129069	Gata2_NM_001090574.1	PTHR10071	TRANSCRIPTION FACTOR GATA (GATA BINDING FACTOR)	GO SLIM	GO:0003676	nucleic acid binding
NA_NA_XeXenL6RMv10031513m	0.460827	2.185	15.0985	0.000102045	0.0129069	NA_NA_XeXenL6RMv10031513m	PTHR14453	PARP/ZINC FINGER CCCH TYPE DOMAIN CONTAINING PROTEIN	GO SLIM	GO:0003676	nucleic acid binding
BC034090_KIAA1614_Taira201203_XENLA_tissue_00286533	0.433814	2.8721	15.045	0.000104978	0.013088	BC034090_KIAA1614_Taira201203_XENLA_tissue_00286533	PTHR17130:SF7	SYNAPTOJANIN 2 BINDING PROTEIN	GO SLIM	GO:0007165	signal transduction
NA_BMP7.1_XeXenL6RMv10005646m	0.490563	2.09312	15.0392	0.0001053	0.013088	NA_BMP7.1_XeXenL6RMv10005646m	PTHR11848	TGF-BETA FAMILY	GO SLIM	GO:0005515	protein binding
NA_NM_001095695.1	0.484633	2.12584	15.0335	0.000105617	0.013088	NA	NA	NA	NA	NA	NA
NA_PDLIM5_Taira201203_XENLA_tissue_00182959	0.538131	1.34779	14.998	0.000107626	0.0132474	NA_PDLIM5_Taira201203_XENLA_tissue_00182959	PTHR24214	FAMILY NOT NAMED	GO SLIM	GO:0005198	structural molecule activity
NA_SOX21_TeperekTkacz201206_XENLA_00125571	-0.486311	1.74805	14.9448	0.000110701	0.0133338	NA_SOX21_TeperekTkacz201206_XENLA_00125571	PTHR10270	SOX TRANSCRIPTION FACTOR	GO SLIM	GO:0003676	nucleic acid binding
Dscaml1_DSCAML1_TeperekTkacz201202_XENLA_00112016	0.365104	5.60032	14.944	0.000110751	0.0133338	Dscaml1_DSCAML1_TeperekTkacz201202_XENLA_00112016	PTHR10489	CELL ADHESION MOLECULE	GO SLIM	GO:0007154	cell communication
Dhh_DHH_Taira201203_XENLA_tissue_00262576	0.42214	2.79709	14.9431	0.000110805	0.0133338	Dhh_DHH_Taira201203_XENLA_tissue_00262576	PTHR11889	HEDGEHOG	GO SLIM	GO:0016787	hydrolase activity
NA_NM_001086215.1	0.398711	3.26902	14.9357	0.000111236	0.0133338	NA_NM_001086215.1	PTHR19325:SF165	SUBFAMILY NOT NAMED	GO SLIM	GO:0050896	response to stimulus
NA_C11ORF2_TC415679	0.385258	3.79229	14.9118	0.000112654	0.0133604	NA	NA	NA	NA	NA	NA
NA_PKDCC.2_Ismailoglu201203_XENLA_00003533	0.368771	4.74234	14.9075	0.000112915	0.0133604	NA	NA	NA	NA	NA	NA
NA_SZL_Taira201203_XENLA_stage_00127515	-0.400859	3.62881	14.8648	0.0001155	0.0135787	NA_SZL_Taira201203_XENLA_stage_00127515	PTHR11309:SF11	SECRETED XWNT8 INHIBITOR SIZZLED-RELATED	GO SLIM	GO:0005515	protein binding
Rnd3_NM_001091085.1	0.400142	3.74252	14.8465	0.000116626	0.0136211	NA	NA	NA	NA	NA	NA
NA_C6ORF47_Kwon201107_XENLA_00076346	0.383642	3.77244	14.8236	0.000118051	0.0136211	NA	NA	NA	NA	NA	NA
NA_NR1H2_Amin201106_XENLA_00091994	0.462989	1.88968	14.8172	0.000118449	0.0136211	NA	NA	NA	NA	NA	NA
Ccdc158_CCDC158_Kwon201107_XENLA_00069282	-0.367643	4.30019	14.8111	0.000118832	0.0136211	NA	NA	NA	NA	NA	NA
NA_COQ10B_Taira201203_XENLA_tissue_00243318	0.369417	4.70635	14.6617	0.000128636	0.0146534	NA_COQ10B_Taira201203_XENLA_tissue_00243318	PTHR12901	SPERM PROTEIN HOMOLOG	GO SLIM	GO:0003824	catalytic activity
Arrdc3_ARRDC3_Park201106_XENLA_00079969	0.394503	3.30965	14.632	0.000130674	0.0147936	NA	NA	NA	NA	NA	NA
Chst3_CHST3_Taira201203_XENLA_stage_00047275	0.465258	2.20656	14.5618	0.000135635	0.0152546	Chst3_CHST3_Taira201203_XENLA_stage_00047275	PTHR10704	CARBOHYDRATE SULFOTRANSFERASE	GO SLIM	GO:0016740	transferase activity
2700049A03Rik_KIAA0586_XeXenL6RMv10030176m	-0.380092	3.64064	14.5474	0.000136677	0.0152546	NA	NA	NA	NA	NA	NA
Junb_NM_001091590.1	0.424702	3.10477	14.5342	0.000137635	0.0152546	Junb_NM_001091590.1	PTHR11462	JUN TRANSCRIPTION FACTOR-RELATED	GO SLIM	GO:0003676	nucleic acid binding
NA_FAM13A_Kwon201107_XENLA_00073252	0.40038	3.1974	14.5283	0.000138073	0.0152546	NA	NA	NA	NA	NA	NA
NA_NA_TeperekTkacz201206_XENLA_00078478	0.435893	4.15953	14.4391	0.000144767	0.0158983	NA_NA_TeperekTkacz201206_XENLA_00078478	PTHR10177	CYCLINE	GO SLIM	GO:0005515	protein binding
Tgfbr1_TGFBR1_Taira201203_XENLA_tissue_00165929	0.447951	1.99515	14.234	0.000161424	0.0175653	Tgfbr1_TGFBR1_Taira201203_XENLA_tissue_00165929	PTHR23255	TRANSFORMING GROWTH FACTOR-BETA RECEPTOR TYPE I AND II	GO SLIM	GO:0004675	transmembrane receptor protein serine/threonine kinase activity
NA_ALDH18A1_Kwon201107_XENLA_00076166	0.505366	1.3841	14.2289	0.000161861	0.0175653	NA_ALDH18A1_Kwon201107_XENLA_00076166	PTHR11063	GLUTAMATE SEMIALDEHYDE DEHYDROGENASE	GO SLIM	GO:0016491	oxidoreductase activity
NA_NA_Taira201203_XENLA_stage_00052262	0.347502	5.47179	14.2144	0.000163114	0.0175971	NA_NA_Taira201203_XENLA_stage_00052262	PTHR10579	CALCIUM-ACTIVATED CHLORIDE CHANNEL REGULATOR	GO SLIM	GO:0005216	ion channel activity
NA_NM_001092518.1	0.411784	2.81584	14.1713	0.000166901	0.0179004	NA_NM_001092518.1	PTHR11353	CHAPERONIN	GO SLIM	GO:0019538	protein metabolic process
Dusp1_DUSP1_XeXenL6RMv10033068m	-0.352554	4.90833	14.1383	0.000169847	0.0181105	Dusp1_DUSP1_XeXenL6RMv10033068m	PTHR10159	DUAL SPECIFICITY PROTEIN PHOSPHATASE	GO SLIM	GO:0016787	hydrolase activity
Trib1_BC073316.1	-0.425806	2.46266	14.0834	0.000174878	0.0185391	Trib1_BC073316.1	PTHR22961	SER/THR PROTEIN KINASE-TRB	GO SLIM	GO:0016740	transferase activity
NA_NA_Kwon201107_XENLA_00014113	0.338555	6.90839	14.0669	0.000176419	0.018595	NA_NA_Kwon201107_XENLA_00014113	PTHR19143:SF51	SUBFAMILY NOT NAMED	GO SLIM	GO:0005515	protein binding
NA_COQ10B_TC448540	0.369225	4.21678	14.0299	0.000179924	0.0188477	NA_COQ10B_TC448540	PTHR12901	SPERM PROTEIN HOMOLOG	GO SLIM	GO:0003824	catalytic activity
Ghitm_GHITM_TC429572	0.381502	3.36577	14.02	0.000180872	0.0188477	Ghitm_GHITM_TC429572	PTHR23291:SF1	GROWTH HORMONE INDUCIBLE TRANSMEMBRANE PROTEIN	GO SLIM	GO:0006915	apoptosis
NA_CHRD_Veenstra201204_XENLA_00009947	0.373586	3.79867	13.986	0.000184173	0.0190833	NA	NA	NA	NA	NA	NA
NA_CKAP2_Taira201203_XENLA_stage_00070693	0.348967	5.67037	13.9405	0.000188684	0.0194408	NA_CKAP2_Taira201203_XENLA_stage_00070693	PTHR16076:SF4	CYTOSKELETON ASSOCIATED PROTEIN 2	GO SLIM	GO:0005200	structural constituent of cytoskeleton
NA_DQ096951.1	0.37648	3.90447	13.893	0.000193521	0.0198278	NA	NA	NA	NA	NA	NA
NA_PDLIM5_Taira201203_XENLA_tissue_00158556	0.407184	2.9325	13.8332	0.000199777	0.0203551	NA_PDLIM5_Taira201203_XENLA_tissue_00158556	PTHR24214	FAMILY NOT NAMED	GO SLIM	GO:0005198	structural molecule activity
NA_NM_001095973.1	0.374039	3.85343	13.7833	0.000205152	0.0207872	NA	NA	NA	NA	NA	NA
Sebox_SEBOX_XeXenL6RMv10046875m	-0.358648	4.06499	13.6569	0.00021943	0.0221118	Sebox_SEBOX_XeXenL6RMv10046875m	PTHR24329:SF93	SUBFAMILY NOT NAMED	GO SLIM	GO:0003676	nucleic acid binding
NA_DSEL_Kwon201107_XENLA_00003761	0.443665	2.14236	13.5692	0.000229926	0.0230429	NA	NA	NA	NA	NA	NA
Hao1_BC146639.1	0.339917	5.77683	13.5499	0.000232299	0.0230749	Hao1_BC146639.1	PTHR10578	(S)-2-HYDROXY-ACID OXIDASE-RELATED	GO SLIM	GO:0016874	ligase activity
NA_AY727861.1	0.348014	4.97899	13.5462	0.000232762	0.0230749	NA_AY727861.1	PTHR11819	SODIUM/SOLUTE SYMPORTER	GO SLIM	GO:0022857	transmembrane transporter activity
NA_ANKRD57_Taira201203_XENLA_tissue_00275092	0.420207	2.55782	13.5241	0.000235514	0.0232222	NA	NA	NA	NA	NA	NA
NA_NA_Taira201203_XENLA_tissue_00047970	0.408515	2.82472	13.4569	0.000244101	0.0239402	NA_NA_Taira201203_XENLA_tissue_00047970	PTHR11465	CATALASE	GO SLIM	GO:0004601	peroxidase activity
Ulk1_ULK1_Kwon201107_XENLA_00010325	0.368415	3.67536	13.3994	0.000251708	0.0245549	NA	NA	NA	NA	NA	NA
Nedd4l_NM_001090789.1	-0.436319	1.99461	13.3341	0.000260617	0.0252895	Nedd4l_NM_001090789.1	PTHR11254	HECT DOMAIN UBIQUITIN-PROTEIN LIGASE	GO SLIM	GO:0016874	ligase activity
NA_SPHK2_Taira201203_XENLA_stage_00058096	0.458864	1.48343	13.2845	0.000267607	0.025748	NA_SPHK2_Taira201203_XENLA_stage_00058096	PTHR12358	SPHINGOSINE KINASE	GO SLIM	GO:0019200	carbohydrate kinase activity
NA_RALGDS_Taira201203_XENLA_tissue_00231633	0.368201	3.71695	13.2807	0.00026815	0.025748	NA_RALGDS_Taira201203_XENLA_tissue_00231633	PTHR23113:SF35	RAL GUANINE NUCLEOTIDE DISSOCIATION STIMULATOR, RALGDS	GO SLIM	GO:0005083	small GTPase regulator activity
Prkg2_PRKG2_Taira201203_XENLA_tissue_00248163	0.387944	3.27072	13.2618	0.000270864	0.0258732	Prkg2_PRKG2_Taira201203_XENLA_tissue_00248163	PTHR24353	CYCLIC NUCLEOTIDE-DEPENDENT PROTEIN KINASE	GO SLIM	GO:0016740	transferase activity
NA_CHMP1B_Kwon201107_XENLA_00008541	0.367635	3.53519	13.2105	0.000278385	0.0264382	NA_CHMP1B_Kwon201107_XENLA_00008541	PTHR10476	CHARGED MULTIVESICULAR BODY PROTEIN	GO SLIM	GO:0016192	vesicle-mediated transport
Slc38a8_SLC38A8_Taira201203_XENLA_stage_00079345	0.429009	2.42974	13.2019	0.000279663	0.0264382	NA	NA	NA	NA	NA	NA
Dusp1_NM_001088684.1	-0.344934	4.60038	13.1792	0.000283076	0.0266237	Dusp1_NM_001088684.1	PTHR10159	DUAL SPECIFICITY PROTEIN PHOSPHATASE	GO SLIM	GO:0016787	hydrolase activity
Rab40b_RAB40B_TC422091	0.337617	5.29793	13.0973	0.000295722	0.0275885	Rab40b_RAB40B_TC422091	PTHR24073	FAMILY NOT NAMED	GO SLIM	GO:0003924	GTPase activity
Rnf24_RNF24_Taira201203_XENLA_tissue_00178150	0.36215	4.20231	13.0872	0.000297323	0.0275885	NA	NA	NA	NA	NA	NA
Sdhd_SDHD_XeXenL6RMv10041922m	0.443339	1.98615	13.0839	0.000297848	0.0275885	Sdhd_SDHD_XeXenL6RMv10041922m	PTHR13337	SUCCINATE DEHYDROGENASE	GO SLIM	GO:0005975	carbohydrate metabolic process
NA_BC074217.1	0.342189	4.82322	13.0476	0.00030368	0.0279874	NA_BC074217.1	PTHR10030	ALPHA-L-FUCOSIDASE	GO SLIM	GO:0016787	hydrolase activity
NA_ACAP3_Kwon201107_XENLA_00059556	0.364099	3.83157	13.0281	0.000306848	0.028138	NA_ACAP3_Kwon201107_XENLA_00059556	PTHR23180	CENTAURIN/ARF	GO SLIM	GO:0005083	small GTPase regulator activity
NA_NM_001096883.1	0.349285	4.62629	12.9823	0.000314445	0.0285853	NA	NA	NA	NA	NA	NA
NA_CHRD_Horb201201_XENLA_00200238	0.35768	3.90605	12.98	0.000314844	0.0285853	NA	NA	NA	NA	NA	NA
Trib1_TRIB1_Park201106_XENLA_00159745	-0.457948	1.54866	12.9224	0.000324677	0.0293329	Trib1_TRIB1_Park201106_XENLA_00159745	PTHR22961	SER/THR PROTEIN KINASE-TRB	GO SLIM	GO:0016740	transferase activity
NA_HSPG2_Ismailoglu201203_XENLA_00073381	0.33074	5.55614	12.8555	0.00033648	0.0302502	NA_HSPG2_Ismailoglu201203_XENLA_00073381	PTHR10489	CELL ADHESION MOLECULE	GO SLIM	GO:0007154	cell communication
NA_LIN54_mgEST_Xl4jul2012_1013110819	-0.344668	3.99072	12.6976	0.000366129	0.0327551	NA	NA	NA	NA	NA	NA
NA_CCT4_Taira201203_XENLA_stage_00189248	0.3554	3.97274	12.6773	0.000370126	0.032952	NA_CCT4_Taira201203_XENLA_stage_00189248	PTHR11353	CHAPERONIN	GO SLIM	GO:0019538	protein metabolic process
NA_BC099044.1	0.339769	4.60033	12.6512	0.000375332	0.0332162	NA_BC099044.1	PTHR15953	FAMILY NOT NAMED	GO SLIM	GO:0005515	protein binding
NA_AY894836.1	-0.391729	2.57178	12.6443	0.000376716	0.0332162	NA_AY894836.1	PTHR23042	CIRCADIAN PROTEIN CLOCK/ARNT/BMAL/PAS	GO SLIM	GO:0003676	nucleic acid binding
Sesn1_SESN1_TC419834	0.355434	3.97094	12.6119	0.000383293	0.0336344	Sesn1_SESN1_TC419834	PTHR12474	P53 REGULATED PA26 NUCLEAR PROTEIN SESTRIN	GO SLIM	GO:0004601	peroxidase activity
Mn1_MN1_Taira201203_XENLA_stage_00064145	0.360911	3.65338	12.5976	0.000386235	0.0337312	NA	NA	NA	NA	NA	NA
NA_CRX_Ismailoglu201203_XENLA_00054319	0.318824	6.92319	12.5743	0.000391092	0.0338913	NA	NA	NA	NA	NA	NA
Upp2_UPP2_TeperekTkacz201202_XENLA_00104215	0.459732	1.83434	12.5711	0.000391764	0.0338913	Upp2_UPP2_TeperekTkacz201202_XENLA_00104215	PTHR21234:SF4	URIDINE PHOSPHORYLASE	GO SLIM	GO:0016740	transferase activity
NA_NA_TC462644	-0.47035	1.39347	12.553	0.000395575	0.0339875	NA_NA_TC462644	PTHR24103:SF74	SUBFAMILY NOT NAMED	GO SLIM	GO:0016874	ligase activity
NA_BX000999.6_Ismailoglu201203_XENLA_00002015	-0.321059	6.67622	12.5482	0.000396582	0.0339875	NA_BX000999.6_Ismailoglu201203_XENLA_00002015	PTHR23022	TRANSPOSABLE ELEMENT-RELATED	GO SLIM	GO:0016787	hydrolase activity
NA_KRT12_Taira201203_XENLA_stage_00145270	0.327058	6.22339	12.4926	0.000408561	0.0347182	NA_KRT12_Taira201203_XENLA_stage_00145270	PTHR23239	INTERMEDIATE FILAMENT	GO SLIM	GO:0005200	structural constituent of cytoskeleton
NA_NA_Quigley201112_XENLA_00059155	0.4566	1.7594	12.4858	0.000410059	0.0347182	NA	NA	NA	NA	NA	NA
NA_BSG_Taira201203_XENLA_stage_00157358	-0.348848	3.7955	12.4825	0.000410788	0.0347182	NA_BSG_Taira201203_XENLA_stage_00157358	PTHR10075:SF6	BASIGIN	GO SLIM	GO:0007166	cell surface receptor linked signal transduction
Txndc9_BC045061.1	0.3403	4.45001	12.4382	0.000420646	0.0353883	Txndc9_BC045061.1	PTHR21148:SF11	THIOREDOXIN DOMAIN CONTAINING PROTEIN 9-RELATED	GO SLIM	GO:0007067	mitosis
NA_NM_001112827.1	-0.360163	3.40697	12.413	0.000426348	0.0357042	NA	NA	NA	NA	NA	NA
Rasal1_RASAL1_Quigley201207_XENLA_00012499	-0.409738	2.21105	12.3813	0.000433655	0.0360861	Rasal1_RASAL1_Quigley201207_XENLA_00012499	PTHR10194	RAS GTPASE-ACTIVATING PROTEINS	GO SLIM	GO:0005083	small GTPase regulator activity
NA_BC157495.1	0.320829	7.00028	12.3762	0.000434843	0.0360861	NA	NA	NA	NA	NA	NA
Hs3st3b1_HS3ST3A1_TC420639	0.405935	2.58556	12.3633	0.000437866	0.0361288	Hs3st3b1_HS3ST3A1_TC420639	PTHR10605	HEPARAN SULFATE 3-O SULFOTRANSFERASE	GO SLIM	GO:0016740	transferase activity
NA_PCDH19_Taira201203_XENLA_tissue_00230375	0.341436	4.14193	12.3404	0.000443262	0.0361288	NA_PCDH19_Taira201203_XENLA_tissue_00230375	PTHR24028	FAMILY NOT NAMED	GO SLIM	GO:0005509	calcium ion binding
NA_BX000999.6_Ismailoglu201203_XENLA_00000418	-0.317653	6.86803	12.3356	0.000444402	0.0361288	NA_BX000999.6_Ismailoglu201203_XENLA_00000418	PTHR23022	TRANSPOSABLE ELEMENT-RELATED	GO SLIM	GO:0016787	hydrolase activity
NA_TANC1_Taira201203_XENLA_stage_00177563	0.356695	3.54984	12.3331	0.000444996	0.0361288	NA	NA	NA	NA	NA	NA
Plk2_BC045272.1	0.338001	5.50637	12.3312	0.000445441	0.0361288	Plk2_BC045272.1	PTHR24345	SERINE/THREONINE-PROTEIN KINASE PLK	GO SLIM	GO:0016740	transferase activity
NA_CTPS_Ismailoglu201203_XENLA_00039586	0.320788	6.48429	12.324	0.000447178	0.0361288	NA_CTPS_Ismailoglu201203_XENLA_00039586	PTHR11550	CTP SYNTHASE	GO SLIM	GO:0016874	ligase activity
Ralgds_RALGDS_Taira201203_XENLA_tissue_00008966	0.356657	3.53918	12.2674	0.000460935	0.037077	Ralgds_RALGDS_Taira201203_XENLA_tissue_00008966	PTHR23113:SF35	RAL GUANINE NUCLEOTIDE DISSOCIATION STIMULATOR, RALGDS	GO SLIM	GO:0005083	small GTPase regulator activity
Zbtb24_ZBTB24_TeperekTkacz201202_XENLA_00074894	-0.368873	2.9785	12.2406	0.000467595	0.0374485	Zbtb24_ZBTB24_TeperekTkacz201202_XENLA_00074894	PTHR24375	FAMILY NOT NAMED	GO SLIM	GO:0003676	nucleic acid binding
Cdc6_CDC6_TC417298	-0.319024	6.0427	12.2043	0.000476782	0.0380182	Cdc6_CDC6_TC417298	PTHR10763:SF18	CELL DIVISION CONTROL PROTEIN 6-RELATED	GO SLIM	GO:0003688	DNA replication origin binding
NA_MTSS1.1_Taira201203_XENLA_stage_00104985	-0.379687	2.70169	12.1549	0.0004896	0.0386636	NA_MTSS1.1_Taira201203_XENLA_stage_00104985	PTHR15708	ACTIN BUNDLING/MISSING IN METASTASIS-RELATED	GO SLIM	GO:0005198	structural molecule activity
NA_NA_Taira201203_XENLA_tissue_00257476	0.403509	2.16621	12.1547	0.000489652	0.0386636	NA_NA_Taira201203_XENLA_tissue_00257476	PTHR15073	MICROTUBULE-ASSOCIATED PROTEIN	GO SLIM	GO:0008092	cytoskeletal protein binding
NA_RBM20_XeXenL6RMv10032301m	0.328688	4.73519	12.1488	0.0004912	0.0386636	NA_RBM20_XeXenL6RMv10032301m	PTHR11546	HETEROGENEOUS NUCLEAR RIBONUCLEOPROTEIN	GO SLIM	GO:0003676	nucleic acid binding
Lsp1_NM_001127789.1	0.445915	1.58645	12.1306	0.000496006	0.038875	Lsp1_NM_001127789.1	PTHR18949	CALDESMON	GO SLIM	GO:0008092	cytoskeletal protein binding
Bmp2_BMP2_Taira201203_XENLA_tissue_00185370	0.384963	2.93401	12.1142	0.000500387	0.0390515	Bmp2_BMP2_Taira201203_XENLA_tissue_00185370	PTHR11848	TGF-BETA FAMILY	GO SLIM	GO:0005515	protein binding
NA_TFAP2C_Taira201203_XENLA_stage_00204194	0.317359	6.61965	12.1021	0.000503663	0.0391406	NA_TFAP2C_Taira201203_XENLA_stage_00204194	PTHR10812	TRANSCRIPTION FACTOR AP-2	GO SLIM	GO:0003676	nucleic acid binding
NA_FZD8_mgEST_Xl4jul2012_1013156664	0.327461	4.8661	12.0886	0.000507306	0.0392574	NA	NA	NA	NA	NA	NA
Aldh18a1_ALDH18A1_Kwon201107_XENLA_00030010	0.3543	3.63327	12.055	0.000516539	0.0398039	Aldh18a1_ALDH18A1_Kwon201107_XENLA_00030010	PTHR11063	GLUTAMATE SEMIALDEHYDE DEHYDROGENASE	GO SLIM	GO:0016491	oxidoreductase activity
NA_NA_XeXenL6RMv10008403m	0.329331	4.70873	12.0041	0.000530823	0.0407335	NA_NA_XeXenL6RMv10008403m	PTHR10579	CALCIUM-ACTIVATED CHLORIDE CHANNEL REGULATOR	GO SLIM	GO:0005216	ion channel activity
NA_ARNTL_TC416134	-0.339805	3.84063	11.9931	0.000533965	0.0408038	NA_ARNTL_TC416134	PTHR23042	CIRCADIAN PROTEIN CLOCK/ARNT/BMAL/PAS	GO SLIM	GO:0003676	nucleic acid binding
NA_MARCH8_TeperekTkacz201206_XENLA_00094067	0.31817	6.62402	11.9768	0.000538659	0.0409917	NA_MARCH8_TeperekTkacz201206_XENLA_00094067	PTHR23012:SF7	MEMBRANE ASSOCIATED RING FINGER 1,8	GO SLIM	GO:0016874	ligase activity
NA_NA_TeperekTkacz201206_XENLA_00061459	-0.333417	4.55403	11.9321	0.000551757	0.041815	NA_NA_TeperekTkacz201206_XENLA_00061459	PTHR10985	BASIC HELIX-LOOP-HELIX TRANSCRIPTION FACTOR, HES-RELATED	GO SLIM	GO:0003676	nucleic acid binding
NA_NP_001015860.1_XeXenL6RMv10032645m	0.343908	3.86607	11.914	0.000557144	0.0420495	NA_NP_001015860.1_XeXenL6RMv10032645m	PTHR10030	ALPHA-L-FUCOSIDASE	GO SLIM	GO:0016787	hydrolase activity
Mxi1_MXI1_Taira201203_XENLA_stage_00119850	-0.370238	2.8435	11.8922	0.000563706	0.0423704	Mxi1_MXI1_Taira201203_XENLA_stage_00119850	PTHR11969:SF5	MAX DIMERIZATION PROTEIN 1, MAD1	GO SLIM	GO:0003676	nucleic acid binding
NA_APLN_TeperekTkacz201206_XENLA_00013087	0.325193	4.88745	11.8455	0.000578007	0.043268	NA_APLN_TeperekTkacz201206_XENLA_00013087	PTHR15953	FAMILY NOT NAMED	GO SLIM	GO:0005515	protein binding
NA_ZC3H3_Taira201203_XENLA_tissue_00257566	-0.372991	2.62969	11.8349	0.000581316	0.0433388	NA_ZC3H3_Taira201203_XENLA_tissue_00257566	PTHR23102	ZINC FINGER (CLIPPER)-RELATED	GO SLIM	GO:0016787	hydrolase activity
NA_HNF1B_TC445330	0.368368	2.89137	11.7453	0.000609986	0.0452921	NA_HNF1B_TC445330	PTHR11568	HEPATOCYTE NUCLEAR FACTOR 1	GO SLIM	GO:0003676	nucleic acid binding
NA_FGFR2_TeperekTkacz201206_XENLA_00119229	0.323325	5.12417	11.6461	0.000643387	0.0475795	NA_FGFR2_TeperekTkacz201206_XENLA_00119229	PTHR24416	TYROSINE-PROTEIN KINASE RECEPTOR	GO SLIM	GO:0016740	transferase activity
NA_MMEL1_Ismailoglu201203_XENLA_00069637	0.365309	2.9152	11.6353	0.000647124	0.0476637	NA_MMEL1_Ismailoglu201203_XENLA_00069637	PTHR11733	ZINC METALLOPROTEASE FAMILY M13 NEPRILYSIN-RELATED	GO SLIM	GO:0016787	hydrolase activity
NA_NA_Horb201201_XENLA_00010666	0.435765	1.69015	11.6081	0.000656648	0.0481717	NA_NA_Horb201201_XENLA_00010666	PTHR11905	ADAM (A DISINTEGRIN AND METALLOPROTEASE DOMAIN)	GO SLIM	GO:0016787	hydrolase activity
NA_BC129634.1	0.34332	3.47856	11.5563	0.000675217	0.0490136	NA_BC129634.1	PTHR10811	FRINGE-RELATED	GO SLIM	GO:0016740	transferase activity
NA_RNASEK_TC432768	-0.323486	4.90303	11.5563	0.000675217	0.0490136	NA	NA	NA	NA	NA	NA
NA_NRM_Ismailoglu201203_XENLA_00067056	0.316207	5.15734	11.5537	0.000676141	0.0490136	NA	NA	NA	NA	NA	NA
NA_NM_001090633.1	0.355447	2.95414	11.5085	0.000692781	0.0498888	NA_NM_001090633.1	PTHR24080	FAMILY NOT NAMED	GO SLIM	GO:0003676	nucleic acid binding
NA_RALGDS_Taira201203_XENLA_stage_00035335	0.331735	4.11955	11.5062	0.000693656	0.0498888	NA_RALGDS_Taira201203_XENLA_stage_00035335	PTHR23113:SF35	RAL GUANINE NUCLEOTIDE DISSOCIATION STIMULATOR, RALGDS	GO SLIM	GO:0005083	small GTPase regulator activity
NA_NM_001085987.1	0.350185	4.16041	11.4916	0.000699126	0.0500858	NA_NM_001085987.1	PTHR23239	INTERMEDIATE FILAMENT	GO SLIM	GO:0005200	structural constituent of cytoskeleton
NA_NRD1_Quigley201207_XENLA_00069582	0.431592	2.22208	11.4817	0.00070286	0.0501574	NA_NRD1_Quigley201207_XENLA_00069582	PTHR11851:SF65	NARDILYSIN PRECURSOR (N-ARGININE DIBASIC CONVERTASE) (NRD CONVERTASE)	GO SLIM	GO:0016787	hydrolase activity
NA_LARP1B_Taira201203_XENLA_tissue_00194307	-0.321113	4.56119	11.4699	0.00070731	0.0502793	NA	NA	NA	NA	NA	NA
NA_TXNIP_Taira201203_XENLA_tissue_00216296	0.463741	1.18014	11.3903	0.000738267	0.0522773	NA	NA	NA	NA	NA	NA
NA_ITGA6_Taira201203_XENLA_tissue_00193984	0.399322	2.35229	11.3494	0.000754713	0.0532363	NA_ITGA6_Taira201203_XENLA_tissue_00193984	PTHR23220	INTEGRIN ALPHA	GO SLIM	GO:0007155	cell adhesion
NA_PLAUR_XeXenL6RMv10039725m	0.390487	2.7363	11.3298	0.000762727	0.0535954	NA	NA	NA	NA	NA	NA
Tanc1_TANC1_Taira201203_XENLA_stage_00090120	0.344683	3.47985	11.321	0.000766356	0.0536449	NA	NA	NA	NA	NA	NA
NA_FRZB_XeXenL6RMv10001921m	0.303809	6.81833	11.3132	0.000769581	0.0536659	NA_FRZB_XeXenL6RMv10001921m	PTHR11309:SF8	SECRETED FRIZZLED-RELATED PROTEIN 3	GO SLIM	GO:0005515	protein binding
NA_BC169775.1	0.303877	6.33429	11.2489	0.000796711	0.055215	NA_BC169775.1	PTHR11042	EUKARYOTIC TRANSLATION INITIATION FACTOR 2-ALPHA KINASE (EIF2-ALPHA KINASE)-RELATED	GO SLIM	GO:0016740	transferase activity
Clpp_CLPP_Taira201203_XENLA_tissue_00230736	0.463762	1.0022	11.2463	0.000797818	0.055215	Clpp_CLPP_Taira201203_XENLA_tissue_00230736	PTHR10381	ATP-DEPENDENT CLP PROTEASE PROTEOLYTIC SUBUNIT	GO SLIM	GO:0016787	hydrolase activity
NA_AKAP9_Quigley201112_XENLA_00088637	-0.345639	3.12506	11.2101	0.000813541	0.0560915	NA_AKAP9_Quigley201112_XENLA_00088637	PTHR23180	CENTAURIN/ARF	GO SLIM	GO:0005083	small GTPase regulator activity
NA_NM_001091312.1	-0.37086	2.84539	11.2023	0.000816953	0.0561158	NA	NA	NA	NA	NA	NA
NA_ZMYND11_Taira201203_XENLA_stage_00152484	-0.364801	2.54133	11.1751	0.000829035	0.0567332	NA_ZMYND11_Taira201203_XENLA_stage_00152484	PTHR24102	PHD FINGER PROTEIN	GO SLIM	GO:0044238	primary metabolic process
NA_U68059.1	0.30125	6.72926	11.1573	0.000837011	0.0570661	NA_U68059.1	PTHR11309:SF8	SECRETED FRIZZLED-RELATED PROTEIN 3	GO SLIM	GO:0005515	protein binding
Nlrc4_NLRC4_Taira201203_XENLA_stage_00044876	0.315865	4.61843	11.1362	0.000846584	0.057505	Nlrc4_NLRC4_Taira201203_XENLA_stage_00044876	PTHR10044	INHIBITOR OF APOPTOSIS	GO SLIM	GO:0005515	protein binding
NA_MARCH8_Taira201203_XENLA_stage_00144257	0.304489	6.69297	11.0256	0.000898622	0.0606287	NA_MARCH8_Taira201203_XENLA_stage_00144257	PTHR23012:SF7	MEMBRANE ASSOCIATED RING FINGER 1,8	GO SLIM	GO:0016874	ligase activity
Hspa14_HSPA14_Taira201203_XENLA_stage_00005467	0.326876	3.88323	11.0244	0.000899183	0.0606287	Hspa14_HSPA14_Taira201203_XENLA_stage_00005467	PTHR19375	HEAT SHOCK PROTEIN 70KDA	GO SLIM	GO:0050896	response to stimulus
Satb1_SATB1_Kwon201107_XENLA_00017267	0.403834	2.06389	10.9921	0.000915024	0.0614709	NA	NA	NA	NA	NA	NA
NA_NM_001090737.1	0.305713	5.46791	10.9776	0.000922182	0.0617256	NA	NA	NA	NA	NA	NA
Fbp1_NM_001087059.1	0.315166	4.9787	10.9346	0.000943831	0.0629449	Fbp1_NM_001087059.1	PTHR11556	FRUCTOSE-1,6-BISPHOSPHATASE-RELATED	GO SLIM	GO:0016787	hydrolase activity
NA_BC060019.1	-0.346642	2.87871	10.9181	0.000952301	0.0632797	NA	NA	NA	NA	NA	NA
Frzb_FRZB_Ismailoglu201203_XENLA_00033617	0.296651	7.33551	10.9029	0.00096016	0.0635716	Frzb_FRZB_Ismailoglu201203_XENLA_00033617	PTHR11309:SF8	SECRETED FRIZZLED-RELATED PROTEIN 3	GO SLIM	GO:0005515	protein binding
Fhl3_NM_001092256.1	0.329205	3.70413	10.8499	0.000987985	0.0651786	Fhl3_NM_001092256.1	PTHR24205	FAMILY NOT NAMED	GO SLIM	GO:0007498	mesoderm development
Ror1_ROR1_Taira201203_XENLA_tissue_00035359	0.389971	2.36027	10.8094	0.00100986	0.0663832	Ror1_ROR1_Taira201203_XENLA_tissue_00035359	PTHR24416	TYROSINE-PROTEIN KINASE RECEPTOR	GO SLIM	GO:0016740	transferase activity
NA_CCDC9_Kwon201107_XENLA_00088796	-0.302874	5.35541	10.7997	0.00101517	0.0664934	NA	NA	NA	NA	NA	NA
NA_BSCL2_TC416609	-0.362451	2.68093	10.7927	0.00101903	0.0665092	NA	NA	NA	NA	NA	NA
Nr6a1_NR6A1_Ismailoglu201203_XENLA_00053224	0.328645	3.7022	10.7763	0.00102809	0.0668624	Nr6a1_NR6A1_Ismailoglu201203_XENLA_00053224	PTHR24080	FAMILY NOT NAMED	GO SLIM	GO:0003676	nucleic acid binding
NA_C11ORF51_Park201106_XENLA_00115824	-0.358587	2.69327	10.7535	0.00104085	0.0674527	NA	NA	NA	NA	NA	NA
Draxin_C1ORF187_Taira201203_XENLA_stage_00079488	0.339657	3.49337	10.7422	0.00104722	0.0676265	NA	NA	NA	NA	NA	NA
NA_NA_Kwon201107_XENLA_00085210	0.41266	1.43251	10.7313	0.00105337	0.0677855	NA	NA	NA	NA	NA	NA
NA_H1FOO_Ismailoglu201203_XENLA_00020761	-0.302088	5.42373	10.7111	0.00106492	0.0682891	NA_H1FOO_Ismailoglu201203_XENLA_00020761	PTHR11467	HISTONE H1/H5	GO SLIM	GO:0003676	nucleic acid binding
NA_C1ORF21_Taira201203_XENLA_stage_00159558	-0.31265	4.28955	10.6989	0.00107201	0.0684087	NA	NA	NA	NA	NA	NA
Rpa1_RPA1_TC415744	0.315636	4.77465	10.695	0.00107425	0.0684087	Rpa1_RPA1_TC415744	PTHR23273	REPLICATION FACTOR A 1, RFA1	GO SLIM	GO:0003676	nucleic acid binding
NA_ARHGAP4_Taira201203_XENLA_tissue_00012118	0.3767	2.5163	10.6835	0.00108095	0.0685976	NA_ARHGAP4_Taira201203_XENLA_tissue_00012118	PTHR14166	SLIT-ROBO RHO GTPASE ACTIVATING PROTEIN	GO SLIM	GO:0005083	small GTPase regulator activity
NA_CER1_TeperekTkacz201206_XENLA_00025148	0.292986	7.60993	10.6537	0.00109848	0.0694695	NA	NA	NA	NA	NA	NA
Slc5a8_SLC5A8_Taira201203_XENLA_stage_00068650	0.304106	5.27781	10.641	0.00110611	0.0697113	Slc5a8_SLC5A8_Taira201203_XENLA_stage_00068650	PTHR11819	SODIUM/SOLUTE SYMPORTER	GO SLIM	GO:0022857	transmembrane transporter activity
NA_SBNO2_Taira201203_XENLA_tissue_00167592	0.313979	4.25464	10.5972	0.0011326	0.0711367	NA_SBNO2_Taira201203_XENLA_tissue_00167592	PTHR12706	STRAWBERRY NOTCH-RELATED	GO SLIM	GO:0016787	hydrolase activity
Map1lc3a_MAP1LC3A_TC420179	0.417539	1.56025	10.5816	0.0011422	0.0714949	Map1lc3a_MAP1LC3A_TC420179	PTHR10969	MICROTUBULE-ASSOCIATED PROTEINS 1A/1B LIGHT CHAIN 3-RELATED	GO SLIM	GO:0008092	cytoskeletal protein binding
NA_NM_001086092.1	0.295903	6.25168	10.5408	0.00116767	0.072349	NA_NM_001086092.1	PTHR10962:SF3	INTEGRAL TRANSMEMBRANE PROTEIN 2A	GO SLIM	GO:0007398	ectoderm development
Cpt1a_NM_001086237.1	0.32538	3.69044	10.5389	0.00116888	0.072349	Cpt1a_NM_001086237.1	PTHR22589	CARNITINE O-ACYLTRANSFERASE	GO SLIM	GO:0016740	transferase activity
Itm2a_NM_001091764.1	0.293576	6.91831	10.5386	0.00116907	0.072349	Itm2a_NM_001091764.1	PTHR10962:SF3	INTEGRAL TRANSMEMBRANE PROTEIN 2A	GO SLIM	GO:0007398	ectoderm development
NA_FAM46A_Quigley201207_XENLA_00002344	0.325004	3.99063	10.5304	0.00117427	0.072349	NA	NA	NA	NA	NA	NA
NA_SEC22A_mgEST_Xl4jul2012_1013088207	-0.320532	3.93755	10.5283	0.00117557	0.072349	NA_SEC22A_mgEST_Xl4jul2012_1013088207	PTHR21136:SF1	SNARE PROTEIN SEC22	GO SLIM	GO:0005515	protein binding
NA_OPTN_Taira201203_XENLA_tissue_00027764	0.384765	2.13864	10.5179	0.00118224	0.0725158	NA	NA	NA	NA	NA	NA
NA_SLC12A3.2_TeperekTkacz201206_XENLA_00055122	0.289751	7.97682	10.5026	0.00119205	0.072874	NA_SLC12A3.2_TeperekTkacz201206_XENLA_00055122	PTHR11827	SOLUTE CARRIER FAMILY 12, CATION COTRANSPORTERS	GO SLIM	GO:0022857	transmembrane transporter activity
NA_NM_001086129.1	0.296774	5.8863	10.4481	0.00122775	0.074807	NA_NM_001086129.1	PTHR10411:SF4	GROWTH ARREST AND DNA DAMAGE-INDUCIBLE PROTEIN GADD45 GAMMA	GO SLIM	GO:0006915	apoptosis
NA_TCF7_Taira201203_XENLA_stage_00164041	0.318061	3.99445	10.4275	0.00124154	0.0750022	NA_TCF7_Taira201203_XENLA_stage_00164041	PTHR10373	T-CELL-SPECIFIC TRANSCRIPTION FACTOR	GO SLIM	GO:0003676	nucleic acid binding
Cnpy2_CNPY2_Taira201203_XENLA_tissue_00250295	0.380042	2.17353	10.4256	0.00124283	0.0750022	NA	NA	NA	NA	NA	NA
NA_CFH_TeperekTkacz201206_XENLA_00005002	0.438811	1.00956	10.425	0.00124322	0.0750022	NA_CFH_TeperekTkacz201206_XENLA_00005002	PTHR19325:SF165	SUBFAMILY NOT NAMED	GO SLIM	GO:0050896	response to stimulus
NA_NM_001086235.1	-0.382381	2.05702	10.417	0.00124858	0.0750785	NA_NM_001086235.1	PTHR12345	SYNTENIN RELATED	GO SLIM	GO:0006886	intracellular protein transport
Gtf2a1l_GTF2A1L_Kwon201107_XENLA_00073319	0.421349	1.3996	10.3561	0.00129044	0.0773421	Gtf2a1l_GTF2A1L_Kwon201107_XENLA_00073319	PTHR12694	TRANSCRIPTION INITIATION FACTOR IIA SUBUNIT 1	GO SLIM	GO:0003676	nucleic acid binding
Krt12_NM_001088963.1	0.300683	5.6437	10.3414	0.00130081	0.0777097	Krt12_NM_001088963.1	PTHR23239	INTERMEDIATE FILAMENT	GO SLIM	GO:0005200	structural constituent of cytoskeleton
Ptk2b_PTK2B_Taira201203_XENLA_tissue_00006004	-0.417556	1.28389	10.3291	0.00130946	0.0779722	Ptk2b_PTK2B_Taira201203_XENLA_tissue_00006004	PTHR24418	TYROSINE-PROTEIN KINASE	GO SLIM	GO:0016740	transferase activity
NA_NM_001096770.1	0.36927	2.39318	10.3027	0.00132837	0.0785974	NA	NA	NA	NA	NA	NA
NA_SPSB4_Taira201203_XENLA_tissue_00114126	0.356265	2.59356	10.2978	0.00133188	0.0785974	NA_SPSB4_Taira201203_XENLA_tissue_00114126	PTHR12245	SPRY DOMAIN CONTAINING SOCS BOX PROTEIN	GO SLIM	GO:0007166	cell surface receptor linked signal transduction
NA_BC157494.1	-0.301162	4.98991	10.2965	0.00133281	0.0785974	NA_BC157494.1	PTHR24326:SF76	SUBFAMILY NOT NAMED	GO SLIM	GO:0003676	nucleic acid binding
Msx2_MSX2_Taira201203_XENLA_tissue_00227253	0.295791	5.57015	10.2687	0.00135303	0.079534	Msx2_MSX2_Taira201203_XENLA_tissue_00227253	PTHR24338	FAMILY NOT NAMED	GO SLIM	GO:0003676	nucleic acid binding
Dclre1a_DCLRE1A_Kwon201107_XENLA_00057880	0.363821	2.33214	10.2516	0.00136566	0.0800195	Dclre1a_DCLRE1A_Kwon201107_XENLA_00057880	PTHR23240	DNA CROSS-LINK REPAIR PROTEIN PSO2/SNM1-RELATED	GO SLIM	GO:0006281	DNA repair
NA_AF079561.1	-0.3125	4.26247	10.2365	0.00137687	0.0803266	NA_AF079561.1	PTHR24326:SF76	SUBFAMILY NOT NAMED	GO SLIM	GO:0003676	nucleic acid binding
Yipf6_YIPF6_Taira201203_XENLA_stage_00117608	0.309274	4.14176	10.2323	0.00138001	0.0803266	Yipf6_YIPF6_Taira201203_XENLA_stage_00117608	PTHR21236	GOLGI MEMBRANE PROTEIN YIP1	GO SLIM	GO:0016192	vesicle-mediated transport
NA_TIMM10_Park201106_XENLA_00171422	0.323684	3.66966	10.2173	0.00139128	0.0803266	NA	NA	NA	NA	NA	NA
NA_KDM5A_Horb201201_XENLA_00001492	0.377793	1.95676	10.2172	0.00139138	0.0803266	NA_KDM5A_Horb201201_XENLA_00001492	PTHR10694	JUMONJI DOMAIN CONTAINING PROTEIN	GO SLIM	GO:0003676	nucleic acid binding
Cebpd_NM_001089609.1	0.341687	3.02086	10.2153	0.0013928	0.0803266	Cebpd_NM_001089609.1	PTHR23334	CCAAT/ENHANCER BINDING PROTEIN	GO SLIM	GO:0003676	nucleic acid binding
NA_NA_Kwon201107_XENLA_00093207	-0.314304	3.85304	10.1971	0.0014066	0.0808498	NA	NA	NA	NA	NA	NA
NA_ZDHHC17_XeXenL6RMv10028519m	0.329033	3.18005	10.1918	0.00141068	0.0808498	NA	NA	NA	NA	NA	NA
NA_NM_001088064.1	-0.285666	8.49968	10.1653	0.00143108	0.081763	NA	NA	NA	NA	NA	NA
Grhl2_GRHL2_XeXenL6RMv10012626m	0.34617	2.96318	10.1527	0.00144091	0.0820693	Grhl2_GRHL2_XeXenL6RMv10012626m	PTHR11037:SF5	LEADER-BINDING PROTEIN 32, ISOFORM 1	GO SLIM	GO:0003676	nucleic acid binding
Mfn2_MFN2_Taira201203_XENLA_stage_00138017	0.401462	1.86942	10.1425	0.00144889	0.0822684	Mfn2_MFN2_Taira201203_XENLA_stage_00138017	PTHR10465	TRANSMEMBRANE GTPASE FZO1	GO SLIM	GO:0016787	hydrolase activity
Fgfr2_FGFR2_Quigley201207_XENLA_00116666	0.287611	7.09878	10.1311	0.00145792	0.0825187	Fgfr2_FGFR2_Quigley201207_XENLA_00116666	PTHR24416	TYROSINE-PROTEIN KINASE RECEPTOR	GO SLIM	GO:0016740	transferase activity
Fbxw7_FBXW7_TeperekTkacz201206_XENLA_00057862	0.313677	4.45375	10.1255	0.0014623	0.0825187	Fbxw7_FBXW7_TeperekTkacz201206_XENLA_00057862	PTHR22844:SF11	F-BOX AND WD40 DOMAIN PROTEIN 7 (FBW7)	GO SLIM	GO:0016874	ligase activity
NA_NRP2_Taira201203_XENLA_stage_00130168	0.364628	2.49523	10.1142	0.00147134	0.0826545	NA	NA	NA	NA	NA	NA
NA_BC059962.1	0.289763	6.6097	10.1112	0.00147372	0.0826545	NA_BC059962.1	PTHR10812	TRANSCRIPTION FACTOR AP-2	GO SLIM	GO:0003676	nucleic acid binding
Pdgfa_M23238.1	0.333304	3.00014	10.09	0.00149073	0.0833535	Pdgfa_M23238.1	PTHR11633:SF3	PLATELET-DERIVED GROWTH FACTOR, A CHAIN	GO SLIM	GO:0005515	protein binding
NA_HHEX_XeXenL6RMv10025037m	0.345546	2.85266	10.0749	0.001503	0.0837404	NA_HHEX_XeXenL6RMv10025037m	PTHR24324	FAMILY NOT NAMED	GO SLIM	GO:0003676	nucleic acid binding
NA_BC108826.1	-0.30727	4.11874	10.0703	0.00150678	0.0837404	NA_BC108826.1	PTHR12779	WISKOTT-ALDRICH SYNDROME PROTEIN	GO SLIM	GO:0005198	structural molecule activity
Foxj1_FOXJ1_Taira201203_XENLA_stage_00143582	0.327159	3.17661	10.0204	0.00154815	0.0857796	Foxj1_FOXJ1_Taira201203_XENLA_stage_00143582	PTHR11829	FAMILY NOT NAMED	GO SLIM	GO:0003676	nucleic acid binding
NA_ENTPD2_Horb201201_XENLA_00090440	-0.323721	3.32761	9.99506	0.00156961	0.0867066	NA_ENTPD2_Horb201201_XENLA_00090440	PTHR11782	ADENOSINE/GUANOSINE DIPHOSPHATASE	GO SLIM	GO:0016787	hydrolase activity
NA_GALE_TC420401	0.328193	3.15838	9.98255	0.00158031	0.0870356	NA_GALE_TC420401	PTHR10366:SF39	UDP-GLUCOSE 4-EPIMERASE	GO SLIM	GO:0016829	lyase activity
Mapkbp1_NM_001093073.1	0.310856	3.8815	9.96882	0.00159213	0.0874243	Mapkbp1_NM_001093073.1	PTHR22847:SF10	WD40 PROTEIN-RELATED	GO SLIM	GO:0006139	nucleobase, nucleoside, nucleotide and nucleic acid metabolic process
NA_ZBTB24_XeXenL6RMv10047780m	-0.348568	2.49653	9.96115	0.00159878	0.087473	NA_ZBTB24_XeXenL6RMv10047780m	PTHR24375	FAMILY NOT NAMED	GO SLIM	GO:0003676	nucleic acid binding
NA_NA_Taira201203_XENLA_tissue_00075852	0.4396	1.70349	9.95681	0.00160256	0.087473	NA	NA	NA	NA	NA	NA
NA_FMNL2_Taira201203_XENLA_tissue_00082825	0.40603	1.48297	9.93705	0.00161985	0.0877741	NA_FMNL2_Taira201203_XENLA_tissue_00082825	PTHR23213	FORMIN-RELATED	GO SLIM	GO:0008092	cytoskeletal protein binding
NA_BAMBI_Taira201203_XENLA_tissue_00105522	-0.289194	5.76872	9.93637	0.00162045	0.0877741	NA	NA	NA	NA	NA	NA
NA_CRABP2_Taira201203_XENLA_tissue_00241645	0.323204	3.90845	9.93412	0.00162243	0.0877741	NA_CRABP2_Taira201203_XENLA_tissue_00241645	PTHR11955	FATTY ACID BINDING PROTEIN	GO SLIM	GO:0008289	lipid binding
NA_CAMK2N2_Taira201203_XENLA_tissue_00290174	0.34131	2.83637	9.91249	0.00164161	0.0885503	NA	NA	NA	NA	NA	NA
NA_DDIT4_TeperekTkacz201206_XENLA_00057525	0.284087	7.22072	9.87698	0.00167359	0.0900108	NA	NA	NA	NA	NA	NA
NA_BC054314.1	0.423057	1.3758	9.85322	0.00169535	0.0909145	NA	NA	NA	NA	NA	NA
Fdft1_FDFT1_Taira201203_XENLA_stage_00076027	0.458515	0.713241	9.84559	0.0017024	0.091026	Fdft1_FDFT1_Taira201203_XENLA_stage_00076027	PTHR11626	FARNESYL-DIPHOSPHATE FARNESYLTRANSFERASE	GO SLIM	GO:0016740	transferase activity
NA_TP53INP1_TeperekTkacz201202_XENLA_00105394	0.289562	5.51089	9.83458	0.00171261	0.0912266	NA	NA	NA	NA	NA	NA
Pold2_POLD2_Taira201203_XENLA_stage_00136581	-0.335851	2.9273	9.83084	0.0017161	0.0912266	Pold2_POLD2_Taira201203_XENLA_stage_00136581	PTHR10416	DNA POLYMERASE DELTA SUBUNIT 2	GO SLIM	GO:0003887	DNA-directed DNA polymerase activity
NA_NM_001097958.1	0.393995	2.03346	9.81732	0.00172876	0.0916341	NA_NM_001097958.1	PTHR15469	NADH-UBIQUINONE OXIDOREDUCTASE B15 SUBUNIT	GO SLIM	GO:0016491	oxidoreductase activity
Sesn1_SESN1_Taira201203_XENLA_tissue_00285480	0.300452	4.61056	9.81046	0.00173522	0.0917119	Sesn1_SESN1_Taira201203_XENLA_tissue_00285480	PTHR12474	P53 REGULATED PA26 NUCLEAR PROTEIN SESTRIN	GO SLIM	GO:0004601	peroxidase activity
NA_PLCD3_Horb201201_XENLA_00057098	0.306558	3.80677	9.77912	0.00176504	0.0930199	NA_PLCD3_Horb201201_XENLA_00057098	PTHR10336	PHOSPHOINOSITIDE-SPECIFIC PHOSPHOLIPASE C FAMILY PROTEIN	GO SLIM	GO:0016787	hydrolase activity
NA_BC157491.1	0.306178	5.06808	9.72758	0.00181523	0.0953906	NA	NA	NA	NA	NA	NA
Itpr3_ITPR3_Taira201203_XENLA_tissue_00251023	0.377046	2.22995	9.70297	0.0018397	0.0964004	Itpr3_ITPR3_Taira201203_XENLA_tissue_00251023	PTHR13715	RYANODINE RECEPTOR AND IP3 RECEPTOR	GO SLIM	GO:0015276	ligand-gated ion channel activity
NA_BPGM_mgEST_Xl4jul2012_1013104806	0.309429	3.80347	9.68513	0.00185765	0.0970635	NA_BPGM_mgEST_Xl4jul2012_1013104806	PTHR11931	PHOSPHOGLYCERATE MUTASE	GO SLIM	GO:0016853	isomerase activity
NA_NM_001097814.1	0.289835	5.05012	9.67592	0.00186699	0.0972744	NA	NA	NA	NA	NA	NA
NA_GJC2_Taira201203_XENLA_tissue_00059974	0.31988	3.68687	9.66234	0.00188084	0.0977184	NA_GJC2_Taira201203_XENLA_tissue_00059974	PTHR11984:SF6	GAP JUNCTION ALPHA-7 PROTEIN (CONNEXIN 45)	GO SLIM	GO:0005243	gap junction channel activity
NA_SEMA6A_XeXenL6RMv10019449m	0.319418	3.21391	9.58688	0.00195972	0.101518	NA_SEMA6A_XeXenL6RMv10019449m	PTHR11036	SEMAPHORIN	GO SLIM	GO:0005515	protein binding
Scn1b_SCN1B_Audic201207_XENLA_00007646	-0.329937	2.90556	9.58191	0.00196504	0.101518	Scn1b_SCN1B_Audic201207_XENLA_00007646	PTHR10546	SODIUM CHANNEL SUBUNIT BETA-1 AND 3	GO SLIM	GO:0005261	cation channel activity
Slc23a2_SLC23A2_Taira201203_XENLA_stage_00042070	0.329092	3.14951	9.55494	0.00199412	0.102731	Slc23a2_SLC23A2_Taira201203_XENLA_stage_00042070	PTHR11119	XANTHINE-URACIL / VITAMIN C PERMEASE FAMILY MEMBER	GO SLIM	GO:0022857	transmembrane transporter activity
Rbm8a_RBM8A_XeXenL6RMv10010425m	-0.286783	5.35911	9.54775	0.00200195	0.102845	NA	NA	NA	NA	NA	NA
NA_XB-GENE-5811098_Ismailoglu201203_XENLA_00004804	0.277913	7.14925	9.5331	0.00201799	0.103379	NA	NA	NA	NA	NA	NA
NA_NA_Kwon201107_XENLA_00002594	0.360596	2.83481	9.50021	0.00205449	0.104762	NA_NA_Kwon201107_XENLA_00002594	PTHR19282:SF60	TETRASPAN-5	GO SLIM	GO:0005515	protein binding
NA_NM_001086042.1	0.317159	3.22299	9.4985	0.0020564	0.104762	NA_NM_001086042.1	PTHR11358	ARGINASE/AGMATINASE	GO SLIM	GO:0016787	hydrolase activity
NA_ESR-5_Taira201203_XENLA_tissue_00272077	-0.29615	4.54357	9.484	0.00207272	0.105301	NA_ESR-5_Taira201203_XENLA_tissue_00272077	PTHR10985	BASIC HELIX-LOOP-HELIX TRANSCRIPTION FACTOR, HES-RELATED	GO SLIM	GO:0003676	nucleic acid binding
NA_PLK2_Taira201203_XENLA_tissue_00181055	0.283903	6.41781	9.47681	0.00208085	0.105422	NA_PLK2_Taira201203_XENLA_tissue_00181055	PTHR24345	SERINE/THREONINE-PROTEIN KINASE PLK	GO SLIM	GO:0016740	transferase activity
NA_DAD1_Taira201203_XENLA_tissue_00015037	0.294579	4.33864	9.46328	0.00209626	0.10591	NA_DAD1_Taira201203_XENLA_tissue_00015037	PTHR10705	DOLICHYL-DIPHOSPHOOLIGOSACCHARIDE--PROTEIN GLYCOSYLTRANSFERASE SUBUNIT DAD1	GO SLIM	GO:0016740	transferase activity
NA_NA_TeperekTkacz201206_XENLA_00066349	0.35093	2.48857	9.43426	0.00212969	0.107304	NA_NA_TeperekTkacz201206_XENLA_00066349	PTHR11339:SF43	ZONADHESIN	GO SLIM	GO:0009566	fertilization
Nrm_NM_001092423.1	0.282798	5.40536	9.41127	0.00215656	0.10836	NA	NA	NA	NA	NA	NA
Arg2_ARG2_XeXenL6RMv10031934m	0.305699	3.5671	9.37562	0.00219891	0.110186	Arg2_ARG2_XeXenL6RMv10031934m	PTHR11358	ARGINASE/AGMATINASE	GO SLIM	GO:0016787	hydrolase activity
NA_NM_001094355.1	-0.28969	4.48876	9.35925	0.00221863	0.110871	NA	NA	NA	NA	NA	NA
NA_NM_001092726.1	0.292392	4.23729	9.35267	0.00222661	0.110968	NA_NM_001092726.1	PTHR11973:SF2	CD166 ANTIGEN (LEUKOCYTE CELL ADHESION MOLECULE)	GO SLIM	GO:0007398	ectoderm development
NA_MAP4_Taira201203_XENLA_stage_00067822	0.360309	2.1175	9.32297	0.00226299	0.112238	NA_MAP4_Taira201203_XENLA_stage_00067822	PTHR11501	MICROTUBULE-ASSOCIATED PROTEIN	GO SLIM	GO:0008092	cytoskeletal protein binding
NA_NA_Taira201203_XENLA_tissue_00252873	0.323249	3.50427	9.32188	0.00226434	0.112238	NA	NA	NA	NA	NA	NA
NA_MORC2_Taira201203_XENLA_tissue_00202636	-0.366554	2.11262	9.3055	0.00228467	0.112817	NA	NA	NA	NA	NA	NA
NA_NM_001093034.1	-0.377365	1.79402	9.29678	0.00229557	0.112817	NA	NA	NA	NA	NA	NA
Zc3h14_NM_001127824.1	-0.277988	5.7505	9.28861	0.00230583	0.112817	NA	NA	NA	NA	NA	NA
NA_TXNIP_Taira201203_XENLA_tissue_00170743	0.373016	1.85661	9.28811	0.00230646	0.112817	NA	NA	NA	NA	NA	NA
Cdca4_CDCA4_Taira201203_XENLA_stage_00033323	0.280402	5.69927	9.28786	0.00230677	0.112817	Cdca4_CDCA4_Taira201203_XENLA_stage_00033323	PTHR16277	CELL DIVISION CYCLE ASSOCIATED PROTEIN 4/SERTA DOMAIN-CONTAINING PROTEIN 2	GO SLIM	GO:0003676	nucleic acid binding
Cep128_NA_Taira201203_XENLA_stage_00130961	-0.306386	3.49493	9.24324	0.00236367	0.115292	NA	NA	NA	NA	NA	NA
Wdr90_WDR90_Taira201203_XENLA_tissue_00253405	-0.278851	5.44283	9.22646	0.00238543	0.116044	NA	NA	NA	NA	NA	NA
NA_DQ096991.1	0.360844	2.44889	9.20163	0.002418	0.117318	NA	NA	NA	NA	NA	NA
NA_BC084639.1	0.37186	2.00771	9.19645	0.00242484	0.117339	NA_BC084639.1	PTHR24027:SF98	SUBFAMILY NOT NAMED	GO SLIM	GO:0005509	calcium ion binding
NA_DLL1_TeperekTkacz201206_XENLA_00079988	0.35959	2.14021	9.18605	0.00243866	0.117698	NA	NA	NA	NA	NA	NA
Fgf16_FGF16_Taira201203_XENLA_tissue_00055335	0.313286	3.48103	9.1781	0.00244929	0.1179	Fgf16_FGF16_Taira201203_XENLA_tissue_00055335	PTHR11486:SF27	FIBROBLAST GROWTH FACTOR 16	GO SLIM	GO:0005515	protein binding
NA_AF465262.1	0.373125	1.63821	9.16259	0.00247013	0.118403	NA	NA	NA	NA	NA	NA
Ift43_IFT43_Quigley201112_XENLA_00083634	0.401316	1.39041	9.16073	0.00247264	0.118403	NA	NA	NA	NA	NA	NA
Dync1li2_NM_001096826.1	0.350936	2.03191	9.1556	0.00247958	0.118426	Dync1li2_NM_001096826.1	PTHR12688	DYNEIN LIGHT INTERMEDIATE CHAIN	GO SLIM	GO:0005515	protein binding
NA_MN1_Ismailoglu201203_XENLA_00041117	-0.279407	6.3147	9.13421	0.00250874	0.119507	NA	NA	NA	NA	NA	NA
NA_GPRC5C_Taira201203_XENLA_tissue_00283337	0.290566	4.87381	9.12161	0.00252607	0.120021	NA_GPRC5C_Taira201203_XENLA_tissue_00283337	PTHR14511	RETINOIC ACID INDUCED G PROTEIN COUPLED RECEPTOR	GO SLIM	GO:0004872	receptor activity
NA_DEDD2_Taira201203_XENLA_stage_00200744	0.309065	3.65381	9.11299	0.00253801	0.120277	NA	NA	NA	NA	NA	NA
Cerk_CERK_Taira201203_XENLA_stage_00144082	0.36051	2.1289	9.10165	0.0025538	0.120532	Cerk_CERK_Taira201203_XENLA_stage_00144082	PTHR12358	SPHINGOSINE KINASE	GO SLIM	GO:0019200	carbohydrate kinase activity
NA_DHRS3_Taira201203_XENLA_stage_00008528	0.280358	5.14242	9.09731	0.00255986	0.120532	NA_DHRS3_Taira201203_XENLA_stage_00008528	PTHR24316	FAMILY NOT NAMED	GO SLIM	GO:0016491	oxidoreductase activity
NA_ADAMTS10_Taira201203_XENLA_stage_00046540	-0.416416	1.09305	9.09499	0.00256311	0.120532	NA_ADAMTS10_Taira201203_XENLA_stage_00046540	PTHR13723:SF26	ADAMTS-10	GO SLIM	GO:0016787	hydrolase activity
NA_AY260730.1	0.273515	6.36912	9.0845	0.00257785	0.120915	NA_AY260730.1	PTHR11819	SODIUM/SOLUTE SYMPORTER	GO SLIM	GO:0022857	transmembrane transporter activity
Rasa3_NM_001093333.1	0.364134	1.9133	9.0418	0.00263876	0.123456	Rasa3_NM_001093333.1	PTHR10194	RAS GTPASE-ACTIVATING PROTEINS	GO SLIM	GO:0005083	small GTPase regulator activity
NA_NA_Taira201203_XENLA_tissue_00265297	-0.405765	1.34292	9.03193	0.00265304	0.123809	NA_NA_Taira201203_XENLA_tissue_00265297	PTHR23414	ADRENOMEDULLIN, ADM	GO SLIM	GO:0005515	protein binding
NA_TNIP2_Kwon201107_XENLA_00008956	-0.309899	3.13943	8.99737	0.00270368	0.125744	NA	NA	NA	NA	NA	NA
NA_HPS3_XeXenL6RMv10010445m	0.309445	3.1976	8.99431	0.00270822	0.125744	NA	NA	NA	NA	NA	NA
NA_XB-GENE-5823762_Taira201203_XENLA_stage_00162837	0.328865	2.58005	8.98289	0.0027252	0.126212	NA_XB-GENE-5823762_Taira201203_XENLA_stage_00162837	PTHR24402	FAMILY NOT NAMED	GO SLIM	GO:0003676	nucleic acid binding
Arl4a_ARL4A_TeperekTkacz201206_XENLA_00034429	0.271067	6.33311	8.97433	0.00273799	0.126486	Arl4a_ARL4A_TeperekTkacz201206_XENLA_00034429	PTHR11711:SF28	ADP-RIBOSYLATION FACTOR-LIKE 4, ARL4	GO SLIM	GO:0016787	hydrolase activity
NA_NM_001096784.1	0.275158	5.51796	8.96107	0.00275793	0.126757	NA_NM_001096784.1	PTHR11309:SF8	SECRETED FRIZZLED-RELATED PROTEIN 3	GO SLIM	GO:0005515	protein binding
Tsga10_BC048022.1	0.328885	3.08628	8.95295	0.00277023	0.126757	NA	NA	NA	NA	NA	NA
NA_BC159344.1	0.37445	1.87388	8.9497	0.00277515	0.126757	NA_BC159344.1	PTHR13906	PORCUPINE	GO SLIM	GO:0016740	transferase activity
NA_NM_001088447.1	0.270457	6.81074	8.9423	0.00278641	0.126757	NA	NA	NA	NA	NA	NA
NA_WDR1_Taira201203_XENLA_tissue_00091462	0.312313	3.5277	8.94191	0.00278701	0.126757	NA_WDR1_Taira201203_XENLA_tissue_00091462	PTHR19856	WD-REPEATCONTAINING PROTEIN (WDR1)	GO SLIM	GO:0008092	cytoskeletal protein binding
NA_LRIG2_TeperekTkacz201206_XENLA_00012970	0.328836	2.6897	8.93277	0.002801	0.126757	NA_LRIG2_TeperekTkacz201206_XENLA_00012970	PTHR24369	FAMILY NOT NAMED	GO SLIM	GO:0004872	receptor activity
NA_XB-GENE-5823762_Ismailoglu201203_XENLA_00062293	0.327824	2.56889	8.93232	0.00280168	0.126757	NA_XB-GENE-5823762_Ismailoglu201203_XENLA_00062293	PTHR24402	FAMILY NOT NAMED	GO SLIM	GO:0003676	nucleic acid binding
NA_NP_001139220.1_Taira201203_XENLA_stage_00049498	0.30617	3.67252	8.93129	0.00280327	0.126757	NA	NA	NA	NA	NA	NA
NA_DDB2_XeXenL6RMv10007079m	-0.30221	3.3475	8.92946	0.00280607	0.126757	NA_DDB2_XeXenL6RMv10007079m	PTHR15169	DAMAGE-SPECIFIC DNA BINDING PROTEIN 2	GO SLIM	GO:0003684	damaged DNA binding
NA_ATP13A-LIKE_Quigley201207_XENLA_00035135	0.33693	2.5631	8.91637	0.00282626	0.127355	NA_ATP13A-LIKE_Quigley201207_XENLA_00035135	PTHR24093:SF57	SUBFAMILY NOT NAMED	GO SLIM	GO:0016787	hydrolase activity
Dpy19l3_DPY19L3_Ismailoglu201203_XENLA_00073394	-0.313881	3.01916	8.89562	0.00285856	0.128495	NA	NA	NA	NA	NA	NA
NA_SEC22A_Ismailoglu201203_XENLA_00074157	-0.280099	4.83107	8.88863	0.00286951	0.128672	NA_SEC22A_Ismailoglu201203_XENLA_00074157	PTHR21136:SF1	SNARE PROTEIN SEC22	GO SLIM	GO:0005515	protein binding
NA_ACO2_XeXenL6RMv10001080m	0.3111	3.62816	8.87625	0.00288904	0.129232	NA_ACO2_XeXenL6RMv10001080m	PTHR11670:SF5	ACONITASE, MITOCHONDRIAL	GO SLIM	GO:0016829	lyase activity
NA_FAM98A_Taira201203_XENLA_tissue_00072669	-0.288866	4.17223	8.85938	0.00291586	0.130114	NA	NA	NA	NA	NA	NA
NA_NDRG4_Kwon201107_XENLA_00125654	0.343857	2.19236	8.84783	0.00293438	0.130623	NA	NA	NA	NA	NA	NA
NA_TAOK3_Kwon201107_XENLA_00134021	-0.298324	3.38938	8.82991	0.00296333	0.131379	NA	NA	NA	NA	NA	NA
NA_INTS12_TeperekTkacz201206_XENLA_00078933	-0.322529	2.6412	8.82845	0.0029657	0.131379	NA	NA	NA	NA	NA	NA
Bag5_BAG5_XeXenL6RMv10036448m	-0.408751	0.954807	8.81276	0.00299131	0.131838	Bag5_BAG5_XeXenL6RMv10036448m	PTHR12329	BCL2-ASSOCIATED ATHANOGENE	GO SLIM	GO:0006915	apoptosis
Ddit4_DDIT4_Taira201203_XENLA_stage_00198975	0.267281	7.31249	8.80206	0.0030089	0.131838	NA	NA	NA	NA	NA	NA
Hps3_NM_001088947.1	0.33513	2.31363	8.8003	0.00301181	0.131838	NA	NA	NA	NA	NA	NA
Ufc1_BC075191.1	0.301527	3.72223	8.80027	0.00301187	0.131838	NA	NA	NA	NA	NA	NA
NA_RNASEK_mgEST_Xl4jul2012_1013254775	-0.279479	5.15923	8.80018	0.00301201	0.131838	NA	NA	NA	NA	NA	NA
NA_NM_001170450.1	0.280406	4.65332	8.78974	0.00302929	0.13217	NA_NM_001170450.1	PTHR22730	PROMININ (PROM) PROTEIN	GO SLIM	GO:0006886	intracellular protein transport
NA_GATM_Amin201106_XENLA_00005624	0.275773	5.42956	8.7869	0.00303401	0.13217	NA_GATM_Amin201106_XENLA_00005624	PTHR10488	GLYCINE AMIDINOTRANSFERASE, MITOCHONDRIAL	GO SLIM	GO:0016740	transferase activity
Ywhag_BC059340.1	-0.299017	3.45134	8.76788	0.00306581	0.133239	Ywhag_BC059340.1	PTHR18860	2003-03-14	GO SLIM	GO:0007049	cell cycle
Prpsap1_PRPSAP1_Taira201203_XENLA_tissue_00015217	0.333478	2.76743	8.75575	0.00308627	0.133498	Prpsap1_PRPSAP1_Taira201203_XENLA_tissue_00015217	PTHR10210	RIBOSE-PHOSPHATE PYROPHOSPHOKINASE	GO SLIM	GO:0016874	ligase activity
Acsf2_ACSF2_Park201106_XENLA_00119376	0.296621	3.82127	8.75572	0.00308632	0.133498	NA	NA	NA	NA	NA	NA
NA_NA_Taira201203_XENLA_tissue_00192965	-0.379979	1.44492	8.73423	0.0031229	0.134732	NA_NA_Taira201203_XENLA_tissue_00192965	PTHR11214:SF19	UDP-GAL:BETAGLCNAC BETA 1,3-GALACTOSYLTRANSFERASE II	GO SLIM	GO:0016740	transferase activity
Alkbh6_NM_001095240.1	-0.32821	2.60816	8.73036	0.00312954	0.134732	NA	NA	NA	NA	NA	NA
NA_LPCAT1_TeperekTkacz201206_XENLA_00056481	0.409557	1.07432	8.70663	0.00317055	0.136178	NA_LPCAT1_TeperekTkacz201206_XENLA_00056481	PTHR23063	ACETYLTRANSFERASE-RELATED	GO SLIM	GO:0005544	calcium-dependent phospholipid binding
NA_NM_001088851.1	0.334113	2.78841	8.69017	0.00319931	0.137092	NA_NM_001088851.1	PTHR22793:SF6	MYOCARDIN-RELATED TRANSCRIPTION FACTOR A	GO SLIM	GO:0003676	nucleic acid binding
NA_MID1_Ismailoglu201203_XENLA_00059773	0.307824	3.30825	8.67842	0.00322001	0.137657	NA	NA	NA	NA	NA	NA
NA_MNS1_XeXenL6RMv10046055m	-0.293161	3.54969	8.66323	0.00324696	0.138487	NA_MNS1_XeXenL6RMv10046055m	PTHR19265	MEIOSIS-SPECIFIC NUCLEAR STRUCTURAL PROTEIN 1	GO SLIM	GO:0005198	structural molecule activity
NA_LOC646644_Taira201203_XENLA_stage_00107252	0.276105	5.13619	8.65842	0.00325553	0.13853	NA	NA	NA	NA	NA	NA
NA_DDR2_Taira201203_XENLA_stage_00200722	-0.284168	4.30051	8.64516	0.00327931	0.139219	NA_DDR2_Taira201203_XENLA_stage_00200722	PTHR24416	TYROSINE-PROTEIN KINASE RECEPTOR	GO SLIM	GO:0016740	transferase activity
NA_GPX1_Taira201203_XENLA_tissue_00030949	0.29586	3.86088	8.63878	0.00329082	0.139385	NA_GPX1_Taira201203_XENLA_tissue_00030949	PTHR11592	GLUTATHIONE PEROXIDASE	GO SLIM	GO:0004601	peroxidase activity
Cfb_NM_001087765.1	0.320369	3.17791	8.63456	0.00329845	0.139386	NA	NA	NA	NA	NA	NA
NA_CAMK2D_Taira201203_XENLA_tissue_00153371	0.314322	2.83684	8.62263	0.00332012	0.139436	NA	NA	NA	NA	NA	NA
NA_BC081143.1	-0.272429	5.29669	8.6152	0.0033337	0.139436	NA_BC081143.1	PTHR23115	TRANSLATION FACTOR	GO SLIM	GO:0019538	protein metabolic process
NA_GPRC5C_TeperekTkacz201206_XENLA_00112460	0.282483	4.84914	8.61498	0.0033341	0.139436	NA_GPRC5C_TeperekTkacz201206_XENLA_00112460	PTHR14511	RETINOIC ACID INDUCED G PROTEIN COUPLED RECEPTOR	GO SLIM	GO:0004872	receptor activity
NA_BC092244.1	-0.304539	3.36764	8.61146	0.00334054	0.139436	NA_BC092244.1	PTHR24103:SF74	SUBFAMILY NOT NAMED	GO SLIM	GO:0016874	ligase activity
NA_HSPG2_TeperekTkacz201202_XENLA_00028828	0.388369	1.45169	8.60812	0.00334667	0.139436	NA_HSPG2_TeperekTkacz201202_XENLA_00028828	PTHR10529:SF113	LOW-DENSITY LIPOPROTEIN RECEPTOR-RELATED	GO SLIM	GO:0004872	receptor activity
NA_CTSC_XeXenL6RMv10044178m	0.27832	4.89667	8.60499	0.00335244	0.139436	NA_CTSC_XeXenL6RMv10044178m	PTHR12411	CYSTEINE PROTEASE FAMILY C1-RELATED	GO SLIM	GO:0016787	hydrolase activity
NA_RNF125_Taira201203_XENLA_stage_00182967	0.375214	1.58055	8.60476	0.00335286	0.139436	NA_RNF125_Taira201203_XENLA_stage_00182967	PTHR13982	RING FINGER DOMAIN CONTAINING PROTEIN	GO SLIM	GO:0003676	nucleic acid binding
NA_BC088794.1	0.313403	3.45368	8.58978	0.00338055	0.140035	NA_BC088794.1	PTHR11886	DYNEIN LIGHT CHAIN	GO SLIM	GO:0005198	structural molecule activity
NA_NM_001085596.1	0.369187	1.80167	8.58872	0.00338252	0.140035	NA_NM_001085596.1	PTHR11848	TGF-BETA FAMILY	GO SLIM	GO:0005515	protein binding
Tnrc6a_TNRC6A_Taira201203_XENLA_stage_00137838	0.276355	5.13533	8.57477	0.00340852	0.140654	Tnrc6a_TNRC6A_Taira201203_XENLA_stage_00137838	PTHR11849:SF50	UNCHARACTERIZED	GO SLIM	GO:0003676	nucleic acid binding
NA_FAT1_Quigley201112_XENLA_00112812	0.281863	4.14063	8.57248	0.00341281	0.140654	NA_FAT1_Quigley201112_XENLA_00112812	PTHR24027:SF76	SUBFAMILY NOT NAMED	GO SLIM	GO:0005509	calcium ion binding
Tnfrsf1a_NP_001119976.1_Ismailoglu201203_XENLA_00001405	-0.294293	3.53645	8.56281	0.003431	0.141086	Tnfrsf1a_NP_001119976.1_Ismailoglu201203_XENLA_00001405	PTHR23097:SF39	TUMOR NECROSIS FACTOR RECEPTOR SUPERFAMILY MEMBER 1A (TNF-R1)	GO SLIM	GO:0004896	hematopoietin/interferon-class (D200-domain) cytokine receptor activity
Ddit3_BC157447.1	-0.36357	1.75173	8.55758	0.00344087	0.141176	NA	NA	NA	NA	NA	NA
Zfyve20_ZFYVE20_XeXenL6RMv10017819m	-0.369597	1.532	8.54317	0.00346821	0.14198	NA	NA	NA	NA	NA	NA
Clcc1_NM_001088136.1	-0.332016	2.17168	8.53869	0.00347675	0.142013	NA	NA	NA	NA	NA	NA
Cntln_CNTLN_Taira201203_XENLA_tissue_00074590	-0.279546	4.29454	8.52845	0.00349637	0.142497	NA	NA	NA	NA	NA	NA
NA_DENND2C_XeXenL6RMv10021094m	0.306015	3.07337	8.51411	0.00352403	0.142581	NA	NA	NA	NA	NA	NA
Srrd_BC087472.1	0.335787	2.28925	8.51273	0.00352671	0.142581	NA	NA	NA	NA	NA	NA
NA_DQ096915.1	0.27189	5.11515	8.51156	0.00352897	0.142581	NA_DQ096915.1	PTHR11003:SF27	POTASSIUM CHANNEL SUBFAMILY K MEMBER 1 (INWARD RECTIFYING POTASSIUM CHANNEL PROTEIN TWIK-1)	GO SLIM	GO:0005261	cation channel activity
NA_XRN1_Ismailoglu201203_XENLA_00059777	-0.266838	5.75868	8.51127	0.00352954	0.142581	NA_XRN1_Ismailoglu201203_XENLA_00059777	PTHR12341	5'->3' EXORIBONUCLEASE	GO SLIM	GO:0016787	hydrolase activity
Elovl6_ELOVL3_Taira201203_XENLA_stage_00181939	0.281597	4.08377	8.50526	0.00354121	0.142738	Elovl6_ELOVL3_Taira201203_XENLA_stage_00181939	PTHR11157	FATTY ACID ACYL TRANSFERASE-RELATED	GO SLIM	GO:0016740	transferase activity
NA_ANKRD52_Taira201203_XENLA_tissue_00021905	0.347524	2.2219	8.50092	0.00354967	0.142765	NA	NA	NA	NA	NA	NA
Hn1_BC081260.1	0.293806	4.06275	8.48656	0.00357779	0.143581	NA	NA	NA	NA	NA	NA
Eomes_NM_001088341.1	0.263609	6.52032	8.45686	0.00363669	0.145542	Eomes_NM_001088341.1	PTHR11267	T-BOX PROTEIN-RELATED	GO SLIM	GO:0003676	nucleic acid binding
Lfng_LFNG_Kwon201107_XENLA_00072628	0.266514	5.63563	8.45394	0.00364253	0.145542	Lfng_LFNG_Kwon201107_XENLA_00072628	PTHR10811	FRINGE-RELATED	GO SLIM	GO:0016740	transferase activity
NA_XPO6_XeXenL6RMv10023480m	-0.281115	4.24643	8.42395	0.0037031	0.147038	NA	NA	NA	NA	NA	NA
Zc3h8_ZC3H3_XeXenL6RMv10024345m	-0.28428	3.87395	8.42257	0.00370591	0.147038	Zc3h8_ZC3H3_XeXenL6RMv10024345m	PTHR23102	ZINC FINGER (CLIPPER)-RELATED	GO SLIM	GO:0016787	hydrolase activity
NA_NA_Taira201203_XENLA_stage_00127163	0.325136	2.43195	8.42115	0.00370881	0.147038	NA_NA_Taira201203_XENLA_stage_00127163	PTHR12019	LAMINA-ASSOCIATED POLYPEPTIDE (THYMOPOIETIN)	GO SLIM	GO:0005515	protein binding
Ppp1r36_PPP1R36_Taira201203_XENLA_tissue_00003925	0.321092	2.41049	8.41957	0.00371204	0.147038	NA	NA	NA	NA	NA	NA
March6_NM_001097848.1	0.339619	2.14356	8.41544	0.00372047	0.147055	March6_NM_001097848.1	PTHR13145	SSM4 PROTEIN	GO SLIM	GO:0016874	ligase activity
Tysnd1_TYSND1_Taira201203_XENLA_tissue_00195337	-0.332328	2.22474	8.40296	0.0037461	0.147463	Tysnd1_TYSND1_Taira201203_XENLA_tissue_00195337	PTHR21004	SERINE PROTEASE-RELATED	GO SLIM	GO:0016787	hydrolase activity
NA_NA_Taira201203_XENLA_stage_00086139	0.337469	2.40917	8.40166	0.00374879	0.147463	NA	NA	NA	NA	NA	NA
Rilp_NM_001096885.1	-0.29079	3.51926	8.39869	0.00375492	0.147463	Rilp_NM_001096885.1	PTHR21502	ZINC FINGER PROTEIN DZIP1	GO SLIM	GO:0003676	nucleic acid binding
Trp53inp1_TP53INP1_TeperekTkacz201206_XENLA_00049613	0.314509	2.91401	8.38776	0.00377756	0.147874	NA	NA	NA	NA	NA	NA
NA_GRK6_Taira201203_XENLA_tissue_00183152	-0.320366	2.48112	8.38511	0.00378307	0.147874	NA_GRK6_Taira201203_XENLA_tissue_00183152	PTHR24355	G PROTEIN-COUPLED RECEPTOR KINASE/RIBOSOMAL PROTEIN S6 KINASE	GO SLIM	GO:0016740	transferase activity
Egflam_EGFLAM_Kwon201107_XENLA_00111824	0.275835	4.47992	8.38199	0.00378956	0.147874	NA	NA	NA	NA	NA	NA
NA_NM_001089091.1	0.271068	5.42255	8.37365	0.00380701	0.148118	NA	NA	NA	NA	NA	NA
Pgp_PGP_Park201106_XENLA_00158337	-0.307351	2.96856	8.37128	0.00381198	0.148118	Pgp_PGP_Park201106_XENLA_00158337	PTHR19288	4-NITROPHENYLPHOSPHATASE-RELATED	GO SLIM	GO:0016787	hydrolase activity
NA_NM_001088347.1	0.34387	2.11745	8.33492	0.00388902	0.150792	NA_NM_001088347.1	PTHR11848	TGF-BETA FAMILY	GO SLIM	GO:0005515	protein binding
NA_LZTS1_Ismailoglu201203_XENLA_00050280	0.30523	2.98699	8.32776	0.00390438	0.151068	NA	NA	NA	NA	NA	NA
NA_WEE1_TC415146	0.268046	5.31251	8.32105	0.00391882	0.151308	NA_WEE1_TC415146	PTHR11042	EUKARYOTIC TRANSLATION INITIATION FACTOR 2-ALPHA KINASE (EIF2-ALPHA KINASE)-RELATED	GO SLIM	GO:0016740	transferase activity
NA_CGNL1_Ismailoglu201203_XENLA_00052848	-0.258658	6.76596	8.29737	0.00397026	0.152972	NA	NA	NA	NA	NA	NA
NA_CABIN1__XeXenL6RMv10011091m	-0.327225	2.31591	8.28543	0.00399645	0.153658	NA_CABIN1__XeXenL6RMv10011091m	PTHR15502	CALCINEURIN-BINDING PROTEIN CABIN 1-RELATED	GO SLIM	GO:0005515	protein binding
NA_BC071053.1	0.283499	4.33966	8.27569	0.00401795	0.153969	NA_BC071053.1	PTHR24073	FAMILY NOT NAMED	GO SLIM	GO:0003924	GTPase activity
NA_ATRN_Quigley201112_XENLA_00012309	-0.375757	1.31013	8.27307	0.00402374	0.153969	NA	NA	NA	NA	NA	NA
NA_SLC12A6_Horb201201_XENLA_00128125	-0.295602	3.14977	8.27037	0.00402973	0.153969	NA_SLC12A6_Horb201201_XENLA_00128125	PTHR11827	SOLUTE CARRIER FAMILY 12, CATION COTRANSPORTERS	GO SLIM	GO:0022857	transmembrane transporter activity
NA_NA_Taira201203_XENLA_stage_00204812	-0.289194	3.64493	8.26115	0.00405026	0.154432	NA	NA	NA	NA	NA	NA
NA_NM_001095132.1	-0.296255	3.39563	8.25716	0.00405916	0.15445	NA_NM_001095132.1	PTHR10730	PROCOLLAGEN-LYSINE,2-OXOGLUTARATE 5-DIOXYGENASE/GLYCOSYLTRANSFERASE 25 FAMILY MEMBER	GO SLIM	GO:0007155	cell adhesion
NA_ENTPD2_XeXenL6RMv10031374m	-0.291932	3.38423	8.24012	0.00409745	0.155584	NA_ENTPD2_XeXenL6RMv10031374m	PTHR11782	ADENOSINE/GUANOSINE DIPHOSPHATASE	GO SLIM	GO:0016787	hydrolase activity
Fut1_FUT1_Taira201203_XENLA_stage_00123712	-0.283897	3.72454	8.22252	0.00413738	0.156651	Fut1_FUT1_Taira201203_XENLA_stage_00123712	PTHR11927	GALACTOSIDE 2-L-FUCOSYLTRANSFERASE	GO SLIM	GO:0016740	transferase activity
Foxb1_FOXB1_Taira201203_XENLA_tissue_00272563	0.272454	4.63913	8.22021	0.00414263	0.156651	Foxb1_FOXB1_Taira201203_XENLA_tissue_00272563	PTHR11829	FAMILY NOT NAMED	GO SLIM	GO:0003676	nucleic acid binding
C3ar1_JN713926.1	0.2833	4.32832	8.214	0.00415685	0.156865	C3ar1_JN713926.1	PTHR24225	CHEMOTACTIC RECEPTOR	GO SLIM	GO:0004872	receptor activity
NA_M30575.1	-0.254823	9.34485	8.20722	0.00417239	0.157129	NA_M30575.1	PTHR24012	FAMILY NOT NAMED	GO SLIM	GO:0003676	nucleic acid binding
NA_ARL4A_Ismailoglu201203_XENLA_00029295	0.258282	6.48093	8.18678	0.00421969	0.158584	NA_ARL4A_Ismailoglu201203_XENLA_00029295	PTHR11711:SF28	ADP-RIBOSYLATION FACTOR-LIKE 4, ARL4	GO SLIM	GO:0016787	hydrolase activity
Larp1b_BC077525.1	-0.259808	6.08506	8.17407	0.00424935	0.159139	NA	NA	NA	NA	NA	NA
NA_EMP2_TC460259	0.288444	3.76799	8.17303	0.00425179	0.159139	NA_EMP2_TC460259	PTHR10671:SF5	EPITHELIAL MEMBRANE PROTEIN 2, EMP2	GO SLIM	GO:0005198	structural molecule activity
NA_BC068724.1	-0.258869	5.96158	8.15214	0.00430104	0.160654	NA	NA	NA	NA	NA	NA
NA_RASGEF1B_TeperekTkacz201206_XENLA_00116836	0.341755	1.97203	8.14135	0.00432671	0.161284	NA_RASGEF1B_TeperekTkacz201206_XENLA_00116836	PTHR23113:SF20	RAS GUANINE NUCLEOTIDE EXCHANGE FACTOR RELATED	GO SLIM	GO:0005083	small GTPase regulator activity
NA_CEP350_Ismailoglu201203_XENLA_00030044	-0.354912	1.67594	8.13032	0.00435311	0.161939	NA	NA	NA	NA	NA	NA
NA_ING2_Taira201203_XENLA_tissue_00092296	-0.286011	3.61359	8.12048	0.0043768	0.162491	NA_ING2_Taira201203_XENLA_tissue_00092296	PTHR10333	INHIBITOR OF GROWTH PROTEIN	GO SLIM	GO:0003676	nucleic acid binding
Ubxn11_UBXN11_Taira201203_XENLA_tissue_00114116	0.334384	2.09957	8.08527	0.00446266	0.165344	NA	NA	NA	NA	NA	NA
NA_TTC34_Taira201203_XENLA_tissue_00215799	0.396751	1.21267	8.06624	0.00450977	0.166752	NA_TTC34_Taira201203_XENLA_tissue_00215799	PTHR23083	TETRATRICOPEPTIDE REPEAT PROTEIN, TPR	GO SLIM	GO:0016740	transferase activity
NA_ITM2A_XeXenL6RMv10006075m	0.256917	6.50565	8.04958	0.00455142	0.167954	NA_ITM2A_XeXenL6RMv10006075m	PTHR10962:SF3	INTEGRAL TRANSMEMBRANE PROTEIN 2A	GO SLIM	GO:0007398	ectoderm development
NA_NA_TeperekTkacz201206_XENLA_00038839	-0.359549	1.63751	8.04262	0.00456895	0.168262	NA_NA_TeperekTkacz201206_XENLA_00038839	PTHR10985	BASIC HELIX-LOOP-HELIX TRANSCRIPTION FACTOR, HES-RELATED	GO SLIM	GO:0003676	nucleic acid binding
NA_NM_001094785.1	-0.26076	5.34403	8.0326	0.00459429	0.168856	NA	NA	NA	NA	NA	NA
NA_DNAJB9_Taira201203_XENLA_tissue_00270171	0.280879	3.8095	8.0223	0.00462048	0.169479	NA_DNAJB9_Taira201203_XENLA_tissue_00270171	PTHR24077	FAMILY NOT NAMED	Panther Class	PC00072	chaperone
Insig1_NM_001097750.1	-0.371004	1.3411	7.98788	0.00470916	0.172313	NA	NA	NA	NA	NA	NA
NA_ZNF800_Taira201203_XENLA_tissue_00006407	0.29093	3.15773	7.9817	0.00472526	0.172313	NA	NA	NA	NA	NA	NA
C8g_C8G_Taira201203_XENLA_tissue_00277605	0.324005	3.26552	7.981	0.00472708	0.172313	C8g_C8G_Taira201203_XENLA_tissue_00277605	PTHR10083:SF91	COMPLEMENT COMPONENT C8 GAMMA CHAIN	GO SLIM	GO:0004867	serine-type endopeptidase inhibitor activity
Pak7_PAK7_Kwon201107_XENLA_00025625	0.326765	2.35299	7.97007	0.0047557	0.172313	NA	NA	NA	NA	NA	NA
NA_NM_001087056.1	0.252328	8.36086	7.96724	0.00476314	0.172313	NA_NM_001087056.1	PTHR23239	INTERMEDIATE FILAMENT	GO SLIM	GO:0005200	structural constituent of cytoskeleton
NA_MKL1_Taira201203_XENLA_stage_00011986	0.298894	3.24156	7.96569	0.00476724	0.172313	NA_MKL1_Taira201203_XENLA_stage_00011986	PTHR22793:SF6	MYOCARDIN-RELATED TRANSCRIPTION FACTOR A	GO SLIM	GO:0003676	nucleic acid binding
NA_UBE2N_mgEST_Xl4jul2012_1013156129	0.276781	3.95411	7.95539	0.00479445	0.172313	NA_UBE2N_mgEST_Xl4jul2012_1013156129	PTHR24067	UBIQUITIN-CONJUGATING ENZYME E2	GO SLIM	GO:0016874	ligase activity
Golim4_GOLIM4_Ismailoglu201203_XENLA_00018581	-0.263308	4.93135	7.95382	0.00479859	0.172313	NA	NA	NA	NA	NA	NA
NA_U65897.1	-0.256525	5.89023	7.95355	0.0047993	0.172313	NA_U65897.1	PTHR24377	FAMILY NOT NAMED	GO SLIM	GO:0003676	nucleic acid binding
NA_MARCH6_XeXenL6RMv10046796m	0.280677	3.68639	7.95302	0.00480072	0.172313	NA_MARCH6_XeXenL6RMv10046796m	PTHR13145	SSM4 PROTEIN	GO SLIM	GO:0016874	ligase activity
Eda2r_EDA2R_Kwon201107_XENLA_00038902	0.267769	5.25234	7.95145	0.00480488	0.172313	NA	NA	NA	NA	NA	NA
Stk38_STK38_TC447253	0.27229	4.16283	7.94934	0.00481049	0.172313	Stk38_STK38_TC447253	PTHR24358	SERINE/THREONINE-PROTEIN KINASE 38	GO SLIM	GO:0016740	transferase activity
NA_NA_Taira201203_XENLA_stage_00206344	-0.258471	5.64794	7.93785	0.00484112	0.172895	NA_NA_Taira201203_XENLA_stage_00206344	PTHR10985	BASIC HELIX-LOOP-HELIX TRANSCRIPTION FACTOR, HES-RELATED	GO SLIM	GO:0003676	nucleic acid binding
Rxrg_RXRG_Taira201203_XENLA_stage_00132377	-0.320221	2.41251	7.93619	0.00484559	0.172895	NA	NA	NA	NA	NA	NA
NA_DNAJB9_XeXenL6RMv10015261m	0.280924	3.72801	7.92785	0.00486795	0.173356	NA_DNAJB9_XeXenL6RMv10015261m	PTHR24077	FAMILY NOT NAMED	Panther Class	PC00072	chaperone
NA_FZD8_XeXenL6RMv10026881m	0.279587	3.83178	7.92422	0.00487775	0.173368	NA	NA	NA	NA	NA	NA
NA_DYNLL2_Ismailoglu201203_XENLA_00016635	0.261372	5.32047	7.91956	0.00489031	0.173478	NA_DYNLL2_Ismailoglu201203_XENLA_00016635	PTHR11886	DYNEIN LIGHT CHAIN	GO SLIM	GO:0005198	structural molecule activity
NA_NM_001089043.1	0.284915	3.43463	7.91424	0.00490472	0.173654	NA	NA	NA	NA	NA	NA
NA_EGFLAM_XeXenL6RMv10009166m	0.292647	3.33912	7.91054	0.00491477	0.173674	NA	NA	NA	NA	NA	NA
NA_LOC388630_XeXenL6RMv10035108m	0.319406	2.25787	7.9062	0.00492656	0.173756	NA	NA	NA	NA	NA	NA
Ndufaf5_C20ORF7_Horb201201_XENLA_00184709	-0.299084	2.89862	7.896	0.00495442	0.174071	NA	NA	NA	NA	NA	NA
NA_FSTL1_Taira201203_XENLA_stage_00188856	0.313154	3.72263	7.89598	0.00495448	0.174071	NA_FSTL1_Taira201203_XENLA_stage_00188856	PTHR10913:SF13	FOLLISTATIN-RELATED PROTEIN 1 (FOLLISTATIN-LIKE 1)	GO SLIM	GO:0005515	protein binding
Pus3_PUS3_XeXenL6RMv10024542m	-0.270794	4.11779	7.88745	0.0049779	0.17438	Pus3_PUS3_XeXenL6RMv10024542m	PTHR11142	PSEUDOURIDYLATE SYNTHASE	GO SLIM	GO:0016829	lyase activity
Emp2_EMP2_TeperekTkacz201206_XENLA_00023495	0.28075	3.91845	7.88444	0.00498618	0.17438	Emp2_EMP2_TeperekTkacz201206_XENLA_00023495	PTHR10671:SF5	EPITHELIAL MEMBRANE PROTEIN 2, EMP2	GO SLIM	GO:0005198	structural molecule activity
NA_SFRP2_Ismailoglu201203_XENLA_00036554	0.352503	1.49452	7.88241	0.00499179	0.17438	NA	NA	NA	NA	NA	NA
NA_KIAA1324L_Horb201201_XENLA_00101042	0.282075	3.62568	7.83747	0.00511741	0.178161	NA	NA	NA	NA	NA	NA
NA_CRABP2_Taira201203_XENLA_stage_00159894	0.333013	2.83928	7.83675	0.00511946	0.178161	NA_CRABP2_Taira201203_XENLA_stage_00159894	PTHR11955	FATTY ACID BINDING PROTEIN	GO SLIM	GO:0008289	lipid binding
NA_HSPG2_Amin201106_XENLA_00034552	0.343854	1.78474	7.83248	0.00513157	0.178244	NA	NA	NA	NA	NA	NA
Fzd8_NM_001085675.1	0.268621	4.37412	7.82268	0.00515946	0.178387	NA	NA	NA	NA	NA	NA
NA_AF137073.1	-0.257174	5.53894	7.82107	0.00516405	0.178387	NA_AF137073.1	PTHR10985	BASIC HELIX-LOOP-HELIX TRANSCRIPTION FACTOR, HES-RELATED	GO SLIM	GO:0003676	nucleic acid binding
Fam174b_FAM174B_TeperekTkacz201206_XENLA_00020415	0.257649	5.35533	7.82079	0.00516486	0.178387	NA	NA	NA	NA	NA	NA
Slc26a6_SLC26A6_Ismailoglu201203_XENLA_00047300	-0.277144	4.11527	7.81433	0.00518336	0.178393	Slc26a6_SLC26A6_Ismailoglu201203_XENLA_00047300	PTHR11814	SULFATE TRANSPORTER	GO SLIM	GO:0022857	transmembrane transporter activity
Zfp750_ZNF750_Ismailoglu201203_XENLA_00001566	0.252075	6.69146	7.81394	0.00518448	0.178393	NA	NA	NA	NA	NA	NA
NA_NA_Taira201203_XENLA_stage_00113350	-0.256259	5.63325	7.79323	0.00524423	0.180111	NA_NA_Taira201203_XENLA_stage_00113350	PTHR10985	BASIC HELIX-LOOP-HELIX TRANSCRIPTION FACTOR, HES-RELATED	GO SLIM	GO:0003676	nucleic acid binding
NA_NM_001096774.1	-0.374012	1.21266	7.77813	0.00528825	0.181283	NA	NA	NA	NA	NA	NA
Prelid1_PRELID1_XeXenL6RMv10011331m	0.290908	3.25813	7.77026	0.00531134	0.181735	Prelid1_PRELID1_XeXenL6RMv10011331m	PTHR11158:SF16	PX19 HOMOLOG	GO SLIM	GO:0030097	hemopoiesis
NA_SPHK2_XeXenL6RMv10042218m	0.337189	1.74018	7.7572	0.00534988	0.182713	NA_SPHK2_XeXenL6RMv10042218m	PTHR12358	SPHINGOSINE KINASE	GO SLIM	GO:0019200	carbohydrate kinase activity
Edc4_NM_001086083.1	-0.251492	6.37877	7.73481	0.00541664	0.184649	Edc4_NM_001086083.1	PTHR15598	AUTOANTIGEN RCD8	GO SLIM	GO:0002376	immune system process
NA_ZIC4_XeXenL6RMv10002522m	-0.369796	1.30328	7.72892	0.00543434	0.184909	NA_ZIC4_XeXenL6RMv10002522m	PTHR19818	ZINC FINGER PROTEIN ZIC AND GLI	GO SLIM	GO:0003676	nucleic acid binding
Sertad1_SERTAD1_Taira201203_XENLA_stage_00047163	0.26906	4.06105	7.71993	0.00546145	0.185153	Sertad1_SERTAD1_Taira201203_XENLA_stage_00047163	PTHR16277	CELL DIVISION CYCLE ASSOCIATED PROTEIN 4/SERTA DOMAIN-CONTAINING PROTEIN 2	GO SLIM	GO:0003676	nucleic acid binding
NA_METTL5_Horb201201_XENLA_00006348	0.356291	1.33662	7.71985	0.0054617	0.185153	NA	NA	NA	NA	NA	NA
NA_NCKAP5L_Kwon201107_XENLA_00134358	-0.262176	4.5784	7.70861	0.00549582	0.185838	NA	NA	NA	NA	NA	NA
NA_ULK1_TeperekTkacz201206_XENLA_00063451	0.26472	5.01197	7.70472	0.00550765	0.185838	NA	NA	NA	NA	NA	NA
NA_GPR56_XeXenL6RMv10009103m	-0.304649	3.78737	7.70319	0.00551233	0.185838	NA_GPR56_XeXenL6RMv10009103m	PTHR12011	G-PROTEIN COUPLED RECEPTOR	GO SLIM	GO:0004872	receptor activity
NA_SFRP2_Taira201203_XENLA_stage_00056972	0.265684	4.40732	7.68937	0.00555471	0.186924	NA	NA	NA	NA	NA	NA
Fam174b_FAM174B_Chung201110_XENLA_00053664	0.253228	5.71926	7.67984	0.0055841	0.187473	NA	NA	NA	NA	NA	NA
NA_NA_Taira201203_XENLA_stage_00055401	0.265025	4.70064	7.67746	0.00559149	0.187473	NA_NA_Taira201203_XENLA_stage_00055401	PTHR11616	SODIUM/CHLORIDE DEPENDENT TRANSPORTER	GO SLIM	GO:0022857	transmembrane transporter activity
Mmp19_MMP19_TeperekTkacz201202_XENLA_00087527	-0.31057	3.38634	7.66225	0.0056388	0.187983	Mmp19_MMP19_TeperekTkacz201202_XENLA_00087527	PTHR10201	MATRIX METALLOPROTEINASE	GO SLIM	GO:0016787	hydrolase activity
NA_FBXW7_Quigley201207_XENLA_00092258	0.264673	4.75713	7.66157	0.00564093	0.187983	NA_FBXW7_Quigley201207_XENLA_00092258	PTHR22844:SF11	F-BOX AND WD40 DOMAIN PROTEIN 7 (FBW7)	GO SLIM	GO:0016874	ligase activity
Pdlim5_NM_001099881.1	0.347808	1.61465	7.65964	0.00564699	0.187983	Pdlim5_NM_001099881.1	PTHR24214	FAMILY NOT NAMED	GO SLIM	GO:0005198	structural molecule activity
Slc2a2_SLC2A2_XeXenL6RMv10007677m	0.361548	1.51645	7.65433	0.00566363	0.187983	Slc2a2_SLC2A2_XeXenL6RMv10007677m	PTHR24063:SF110	SUBFAMILY NOT NAMED	GO SLIM	GO:0022857	transmembrane transporter activity
NA_DHX40_TeperekTkacz201206_XENLA_00028072	-0.304475	2.55042	7.65355	0.00566607	0.187983	NA_DHX40_TeperekTkacz201206_XENLA_00028072	PTHR18934	ATP-DEPENDENT RNA HELICASE	GO SLIM	GO:0003676	nucleic acid binding
Clpp_CLPP_Ismailoglu201203_XENLA_00038599	0.32876	1.99311	7.65287	0.00566819	0.187983	Clpp_CLPP_Ismailoglu201203_XENLA_00038599	PTHR10381	ATP-DEPENDENT CLP PROTEASE PROTEOLYTIC SUBUNIT	GO SLIM	GO:0016787	hydrolase activity
Lrriq1_LRRIQ1_Taira201203_XENLA_tissue_00014896	0.30422	2.8065	7.63111	0.005737	0.189922	Lrriq1_LRRIQ1_Taira201203_XENLA_tissue_00014896	PTHR24371	FAMILY NOT NAMED	GO SLIM	GO:0004872	receptor activity
Tat_BC074414.1	-0.300898	2.8	7.62246	0.00576459	0.190491	Tat_BC074414.1	PTHR11751:SF28	TYROSINE AMINOTRANSFERASE	GO SLIM	GO:0008483	transaminase activity
Sfrp2_SFRP2_XeXenL6RMv10037188m	0.257545	4.97206	7.60563	0.00581864	0.191931	NA	NA	NA	NA	NA	NA
NA_SNRK_Taira201203_XENLA_stage_00158084	0.347583	1.54511	7.59351	0.00585788	0.192807	NA_SNRK_Taira201203_XENLA_stage_00158084	PTHR24343:SF47	SERINE/THREONINE-PROTEIN KINASE KIN1,2	GO SLIM	GO:0016740	transferase activity
Srd5a3_SRD5A3_Taira201203_XENLA_tissue_00132282	0.328213	2.0423	7.58463	0.00588681	0.192807	NA	NA	NA	NA	NA	NA
NA_FAM13A_Taira201203_XENLA_tissue_00150631	0.283093	3.2796	7.58412	0.00588846	0.192807	NA	NA	NA	NA	NA	NA
NA_VPS4B_Chung201110_XENLA_00044385	0.30503	2.66399	7.58369	0.00588988	0.192807	NA_VPS4B_Chung201110_XENLA_00044385	PTHR23074	AAA ATPASE	GO SLIM	GO:0016787	hydrolase activity
NA_NP_001120298.1_Quigley201112_XENLA_00041027	0.325783	1.8636	7.58128	0.00589774	0.192807	NA_NP_001120298.1_Quigley201112_XENLA_00041027	PTHR10063	TUBERIN	GO SLIM	GO:0005083	small GTPase regulator activity
NA_VLDLR_Taira201203_XENLA_tissue_00078205	0.286836	3.32189	7.56793	0.00594159	0.193271	NA_VLDLR_Taira201203_XENLA_tissue_00078205	PTHR10529:SF101	VERY LOW-DENSITY LIPOPROTEIN RECEPTOR	GO SLIM	GO:0004872	receptor activity
Uxt_UXT_Park201106_XENLA_00027238	0.311638	2.53403	7.56768	0.00594244	0.193271	Uxt_UXT_Park201106_XENLA_00027238	PTHR13345	NUT2 AND UXT	GO SLIM	GO:0019538	protein metabolic process
NA_NA_Amin201106_XENLA_00037787	-0.342972	1.73194	7.56733	0.00594356	0.193271	NA	NA	NA	NA	NA	NA
NA_XEPSIN_Taira201203_XENLA_stage_00166974	0.307138	2.60684	7.55884	0.00597165	0.193841	NA	NA	NA	NA	NA	NA
NA_CDCA7_Taira201203_XENLA_stage_00211711	0.250593	5.75092	7.55022	0.00600029	0.194136	NA	NA	NA	NA	NA	NA
Kcne1l_NA_XeXenL6RMv10047763m	0.290256	2.89911	7.54972	0.00600193	0.194136	Kcne1l_NA_XeXenL6RMv10047763m	PTHR15282	POTASSIUM VOLTAGE-GATED CHANNEL SUBFAMILY E MEMBER 1, 3	GO SLIM	GO:0005261	cation channel activity
NA_NM_001088214.1	-0.293876	3.23371	7.54428	0.00602009	0.194381	NA_NM_001088214.1	PTHR11829	FAMILY NOT NAMED	GO SLIM	GO:0003676	nucleic acid binding
Tspan15_TSPAN15_Taira201203_XENLA_stage_00022738	0.266634	4.26118	7.53468	0.00605226	0.194747	Tspan15_TSPAN15_Taira201203_XENLA_stage_00022738	PTHR19282:SF56	TRANSMEMBRANE 4 SUPERFAMILY MEMBER 15	GO SLIM	GO:0005515	protein binding
NA_LDHB_Taira201203_XENLA_tissue_00180179	0.317138	2.13143	7.5315	0.00606295	0.194747	NA_LDHB_Taira201203_XENLA_tissue_00180179	PTHR11540	MALATE AND LACTATE DEHYDROGENASE	GO SLIM	GO:0016491	oxidoreductase activity
NA_NM_001090079.1	0.25482	5.40062	7.53043	0.00606654	0.194747	NA_NM_001090079.1	PTHR24055	MITOGEN-ACTIVATED PROTEIN KINASE	GO SLIM	GO:0016740	transferase activity
NA_NA_TeperekTkacz201206_XENLA_00025552	0.255834	5.10032	7.52825	0.00607389	0.194747	NA_NA_TeperekTkacz201206_XENLA_00025552	PTHR10044	INHIBITOR OF APOPTOSIS	GO SLIM	GO:0005515	protein binding
NA_TUBB4A__Taira201203_XENLA_stage_00151835	0.244229	8.28791	7.52113	0.00609794	0.195177	NA	NA	NA	NA	NA	NA
NA_LETM2_Kwon201107_XENLA_00084761	-0.257559	4.88121	7.51079	0.00613305	0.195958	NA	NA	NA	NA	NA	NA
NA_BC046860.1	0.32935	2.20715	7.50763	0.00614382	0.195961	NA_BC046860.1	PTHR11670:SF5	ACONITASE, MITOCHONDRIAL	GO SLIM	GO:0016829	lyase activity
Xpo6_XPO6_TC413998	-0.250655	5.78567	7.4925	0.00619566	0.197272	NA	NA	NA	NA	NA	NA
NA_XEPSIN_Taira201203_XENLA_stage_00061520	0.306296	2.58218	7.48696	0.00621473	0.197536	NA	NA	NA	NA	NA	NA
Lin54_LIN54_Taira201203_XENLA_tissue_00095402	-0.263922	4.05205	7.45875	0.00631288	0.200308	Lin54_LIN54_Taira201203_XENLA_tissue_00095402	PTHR12446:SF2	CXC DOMAIN-CONTAINING PROTEIN 1	GO SLIM	GO:0007049	cell cycle
NA_NM_001127790.1	0.280739	3.35656	7.44379	0.00636556	0.201631	NA_NM_001127790.1	PTHR22826:SF49	SERINE/THREONINE-PROTEIN KINASE DUET	GO SLIM	GO:0005083	small GTPase regulator activity
Itprip_ITPRIP_TeperekTkacz201202_XENLA_00051398	-0.275084	3.45305	7.41452	0.00646995	0.204584	NA	NA	NA	NA	NA	NA
NA_RHEBL1_TeperekTkacz201206_XENLA_00096962	0.244725	7.30053	7.40649	0.0064989	0.205146	NA	NA	NA	NA	NA	NA
NA_NM_001095136.1	-0.247498	6.01572	7.40336	0.00651023	0.205151	NA	NA	NA	NA	NA	NA
NA_BC130067.1	-0.254266	4.8276	7.3901	0.00655837	0.206096	NA_BC130067.1	PTHR22847:SF14	UBIQUITIN LIGASE PROTEIN COP1 (CONSTITUTIVE PHOTOMORPHOGENESIS PROTEIN 1) (HCOP1)	GO SLIM	GO:0016874	ligase activity
Bcor_BCOR_XeXenL6RMv10016381m	0.251247	5.26703	7.38683	0.00657031	0.206096	NA	NA	NA	NA	NA	NA
M6pr_M6PR_XeXenL6RMv10041699m	0.268978	3.80713	7.38584	0.00657395	0.206096	M6pr_M6PR_XeXenL6RMv10041699m	PTHR15071	CATION-DEPENDENT MANNOSE-6-PHOSPHATE RECEPTOR	GO SLIM	GO:0004872	receptor activity
NA_PRELID1_TC429231	0.346083	1.56335	7.37642	0.00660846	0.206486	NA_PRELID1_TC429231	PTHR11158:SF16	PX19 HOMOLOG	GO SLIM	GO:0030097	hemopoiesis
NA_PCNA_TC422673	0.252024	5.19838	7.37463	0.00661506	0.206486	NA_PCNA_TC422673	PTHR11352	PROLIFERATING CELL NUCLEAR ANTIGEN	GO SLIM	GO:0003676	nucleic acid binding
NA_PARP3_Ismailoglu201203_XENLA_00072813	0.266555	4.3147	7.37324	0.00662016	0.206486	NA_PARP3_Ismailoglu201203_XENLA_00072813	PTHR15447	POLY [ADP-RIBOSE] POLYMERASE	GO SLIM	GO:0016740	transferase activity
Lrrfip1_LRRFIP1_Taira201203_XENLA_tissue_00287945	-0.285824	2.92126	7.35921	0.00667203	0.207585	Lrrfip1_LRRFIP1_Taira201203_XENLA_tissue_00287945	PTHR19212	LEUCINE RICH REPEAT (IN FLII) INTERACTING PROTEIN	GO SLIM	GO:0003676	nucleic acid binding
NA_AUTS2_Taira201203_XENLA_tissue_00256568	0.268112	3.95219	7.35759	0.00667803	0.207585	NA	NA	NA	NA	NA	NA
Fjx1_FJX1_Taira201203_XENLA_tissue_00021756	0.321756	2.35739	7.35271	0.00669617	0.207796	NA	NA	NA	NA	NA	NA
Clip2_CLIP2_Taira201203_XENLA_tissue_00133293	-0.270376	3.6917	7.34711	0.00671706	0.20802	Clip2_CLIP2_Taira201203_XENLA_tissue_00133293	PTHR18916	DYNACTIN 1-RELATED MICROTUBULE-BINDING	GO SLIM	GO:0008092	cytoskeletal protein binding
NA_CD82_TC428676	-0.273207	3.62905	7.3447	0.00672606	0.20802	NA_CD82_TC428676	PTHR19282:SF44	CD82	GO SLIM	GO:0005515	protein binding
Specc1_SPECC1_Taira201203_XENLA_stage_00028924	-0.255467	4.49512	7.33012	0.00678087	0.209362	NA	NA	NA	NA	NA	NA
NA_BC097872.1	0.307907	2.2523	7.32444	0.00680231	0.209671	NA	NA	NA	NA	NA	NA
NA_NA_Taira201203_XENLA_tissue_00216827	0.250339	5.32118	7.31949	0.00682107	0.209897	NA_NA_Taira201203_XENLA_tissue_00216827	PTHR22811:SF6	TRANSMEMBRANE PROTEIN TMP21-RELATED	GO SLIM	GO:0006886	intracellular protein transport
NA_HAT1_XeXenL6RMv10051554m	0.28464	2.95703	7.31259	0.00684731	0.210351	NA_HAT1_XeXenL6RMv10051554m	PTHR12046	HISTONE ACETYLTRANSFERASE TYPE B CATALYTIC SUBUNIT	GO SLIM	GO:0016740	transferase activity
NA_OAF_Ismailoglu201203_XENLA_00041619	-0.273441	3.45787	7.30742	0.00686703	0.210604	NA_OAF_Ismailoglu201203_XENLA_00041619	PTHR13423	OUT AT FIRST	GO SLIM	GO:0007398	ectoderm development
Map4_NM_001090301.1	0.330623	1.69309	7.29654	0.00690875	0.21153	Map4_NM_001090301.1	PTHR11501	MICROTUBULE-ASSOCIATED PROTEIN	GO SLIM	GO:0008092	cytoskeletal protein binding
Adam28_NP_001233133.1_Kwon201107_XENLA_00026327	-0.259197	4.22738	7.28464	0.00695466	0.212581	Adam28_NP_001233133.1_Kwon201107_XENLA_00026327	PTHR11905	ADAM (A DISINTEGRIN AND METALLOPROTEASE DOMAIN)	GO SLIM	GO:0016787	hydrolase activity
NA_NA_XeXenL6RMv10005433m	-0.287291	2.85798	7.27952	0.00697451	0.212646	NA_NA_XeXenL6RMv10005433m	PTHR10887	DNA2/NAM7 HELICASE FAMILY	GO SLIM	GO:0016787	hydrolase activity
NA_FOXN3_Taira201203_XENLA_tissue_00060381	0.243787	6.21816	7.27594	0.00698844	0.212646	NA	NA	NA	NA	NA	NA
NA_RAB33B_TC422019	-0.284737	2.92993	7.27513	0.00699159	0.212646	NA_RAB33B_TC422019	PTHR24073	FAMILY NOT NAMED	GO SLIM	GO:0003924	GTPase activity
NA_NM_001088399.1	0.244308	6.514	7.26483	0.0070318	0.213515	NA_NM_001088399.1	PTHR24288	FAMILY NOT NAMED	GO SLIM	GO:0016491	oxidoreductase activity
NA_NM_001095677.1	-0.286902	3.06546	7.26047	0.00704887	0.21368	NA	NA	NA	NA	NA	NA
Elp3_ELP3_Taira201203_XENLA_tissue_00216157	-0.296377	2.73267	7.24199	0.0071218	0.215534	Elp3_ELP3_Taira201203_XENLA_tissue_00216157	PTHR11135	HISTONE ACETYLTRANSFERASE-RELATED	GO SLIM	GO:0016740	transferase activity
Mboat1_BC128937.1	0.297574	2.71263	7.23756	0.00713938	0.215711	Mboat1_BC128937.1	PTHR13906	PORCUPINE	GO SLIM	GO:0016740	transferase activity
Klf11_KLF11_Taira201203_XENLA_stage_00108941	0.248118	5.54741	7.23337	0.00715606	0.215859	Klf11_KLF11_Taira201203_XENLA_stage_00108941	PTHR23223	KRUEPPEL C2H2-TYPE ZINC-FINGER	GO SLIM	GO:0003676	nucleic acid binding
NA_SEC23IP_XeXenL6RMv10021215m	-0.273565	3.40101	7.21029	0.00724866	0.217725	NA_SEC23IP_XeXenL6RMv10021215m	PTHR15457:SF8	SEC-23 INTERACTING PROTEIN P125	GO SLIM	GO:0016787	hydrolase activity
Prpsap1_NM_001086035.1	0.281103	3.34311	7.2097	0.00725106	0.217725	Prpsap1_NM_001086035.1	PTHR10210	RIBOSE-PHOSPHATE PYROPHOSPHOKINASE	GO SLIM	GO:0016874	ligase activity
NA_F7CFV6_XENTR_Taira201203_XENLA_tissue_00081547	0.270396	3.42344	7.20909	0.00725353	0.217725	NA_F7CFV6_XENTR_Taira201203_XENLA_tissue_00081547	PTHR12011	G-PROTEIN COUPLED RECEPTOR	GO SLIM	GO:0004872	receptor activity
NA_NM_001095438.1	0.25026	5.2214	7.20312	0.00727769	0.217754	NA_NM_001095438.1	PTHR11886	DYNEIN LIGHT CHAIN	GO SLIM	GO:0005198	structural molecule activity
NA_MNS1_Quigley201207_XENLA_00097973	-0.263503	3.8509	7.20298	0.00727826	0.217754	NA_MNS1_Quigley201207_XENLA_00097973	PTHR19265	MEIOSIS-SPECIFIC NUCLEAR STRUCTURAL PROTEIN 1	GO SLIM	GO:0005198	structural molecule activity
NA_NFE2L1_Ismailoglu201203_XENLA_00045791	-0.260201	4.28802	7.19276	0.00731981	0.218359	NA	NA	NA	NA	NA	NA
Dennd2a_DENND2A_Park201106_XENLA_00110761	0.279763	3.22495	7.19216	0.0073223	0.218359	NA	NA	NA	NA	NA	NA
NA_BSCL2_Taira201203_XENLA_stage_00156592	-0.269377	3.5705	7.17432	0.00739543	0.219647	NA	NA	NA	NA	NA	NA
NA_NP_001120415.1_Taira201203_XENLA_stage_00130420	0.305885	2.19514	7.17344	0.00739906	0.219647	NA	NA	NA	NA	NA	NA
NA_NA_Taira201203_XENLA_tissue_00047004	-0.283247	2.83512	7.17288	0.0074014	0.219647	NA	NA	NA	NA	NA	NA
NA_MFN2_Taira201203_XENLA_stage_00117291	0.289007	2.81173	7.16765	0.007423	0.219932	NA_MFN2_Taira201203_XENLA_stage_00117291	PTHR10465	TRANSMEMBRANE GTPASE FZO1	GO SLIM	GO:0016787	hydrolase activity
NA_SPAST_Kwon201107_XENLA_00085618	-0.306037	2.35658	7.16271	0.00744347	0.220183	NA_SPAST_Kwon201107_XENLA_00085618	PTHR23074	AAA ATPASE	GO SLIM	GO:0016787	hydrolase activity
NA_TRIM2_Taira201203_XENLA_tissue_00222492	0.316534	2.20796	7.14923	0.0074996	0.221371	NA	NA	NA	NA	NA	NA
NA_NM_001092550.1	0.298141	2.31755	7.1444	0.00751983	0.221371	NA	NA	NA	NA	NA	NA
Ube2e2_NM_001094637.1	0.263766	3.99547	7.1444	0.00751986	0.221371	Ube2e2_NM_001094637.1	PTHR24068	FAMILY NOT NAMED	GO SLIM	GO:0016874	ligase activity
NA_MYO5B_Park201106_XENLA_00178032	0.29373	3.19559	7.13754	0.00754866	0.221863	NA_MYO5B_Park201106_XENLA_00178032	PTHR25370:SF8	SUBFAMILY NOT NAMED	GO SLIM	GO:0003774	motor activity
Mybl1_MYBL1_Kwon201107_XENLA_00083414	-0.34415	1.48216	7.12424	0.00760485	0.222462	Mybl1_MYBL1_Kwon201107_XENLA_00083414	PTHR10641	MYB-LIKE DNA-BINDING PROTEIN MYB	GO SLIM	GO:0003676	nucleic acid binding
NA_ROBO3_Taira201203_XENLA_stage_00052782	0.262643	3.83838	7.12158	0.00761617	0.222462	NA_ROBO3_Taira201203_XENLA_stage_00052782	PTHR10489	CELL ADHESION MOLECULE	GO SLIM	GO:0007154	cell communication
NA_FNTA_Chung201110_XENLA_00052215	0.294248	2.69062	7.12154	0.00761631	0.222462	NA_FNTA_Chung201110_XENLA_00052215	PTHR11129	PROTEIN FARNESYLTRANSFERASE ALPHA SUBUNIT/RAB GERANYLGERANYL TRANSFERASE ALPHA SUBUNIT	GO SLIM	GO:0016740	transferase activity
4932438A13Rik_NA_Kwon201107_XENLA_00111921	-0.306939	2.13057	7.12125	0.00761755	0.222462	NA	NA	NA	NA	NA	NA
NA_CCNY_Kwon201107_XENLA_00104280	-0.326201	1.73511	7.11709	0.00763527	0.222471	NA	NA	NA	NA	NA	NA
Dhrs3_DHRS3_XeXenL6RMv10001795m	0.242047	6.19078	7.11547	0.00764214	0.222471	Dhrs3_DHRS3_XeXenL6RMv10001795m	PTHR24316	FAMILY NOT NAMED	GO SLIM	GO:0016491	oxidoreductase activity
Gskip_BC070847.1	0.297471	2.41329	7.11136	0.00765968	0.222628	NA	NA	NA	NA	NA	NA
NA_SETBP1_Ismailoglu201203_XENLA_00068000	-0.31743	2.10082	7.10511	0.00768644	0.223053	NA	NA	NA	NA	NA	NA
Ccs_BC077488.1	0.281299	2.97302	7.0993	0.00771139	0.223423	Ccs_BC077488.1	PTHR10003	SUPEROXIDE DISMUTASE [CU-ZN]-RELATED	GO SLIM	GO:0016209	antioxidant activity
NA_NA_Ismailoglu201203_XENLA_00060981	-0.254449	4.77999	7.07874	0.00780036	0.225645	NA	NA	NA	NA	NA	NA
NA_NM_001094719.1	-0.249722	4.84586	7.07395	0.00782128	0.225893	NA	NA	NA	NA	NA	NA
NA_NA_Park201106_XENLA_00132878	-0.289356	2.64713	7.06489	0.00786092	0.226679	NA	NA	NA	NA	NA	NA
Fastkd1_FASTKD1_Ismailoglu201203_XENLA_00043279	-0.276391	3.02235	7.06089	0.00787851	0.226679	NA	NA	NA	NA	NA	NA
Tysnd1_TYSND1_Ismailoglu201203_XENLA_00030465	-0.291037	2.60359	7.05928	0.00788557	0.226679	Tysnd1_TYSND1_Ismailoglu201203_XENLA_00030465	PTHR21004	SERINE PROTEASE-RELATED	GO SLIM	GO:0016787	hydrolase activity
NA_ITGA3_Taira201203_XENLA_stage_00003257	0.264741	3.85628	7.03752	0.00798193	0.22909	NA_ITGA3_Taira201203_XENLA_stage_00003257	PTHR23220	INTEGRIN ALPHA	GO SLIM	GO:0007155	cell adhesion
NA_NA_Kwon201107_XENLA_00089354	0.322282	1.7812	7.01743	0.00807199	0.231072	NA	NA	NA	NA	NA	NA
NA_RPS29_TC458753	0.257945	4.56949	7.01651	0.00807617	0.231072	NA	NA	NA	NA	NA	NA
Elac2_ELAC2_XeXenL6RMv10007980m	-0.303478	2.08603	6.995	0.00817376	0.2335	Elac2_ELAC2_XeXenL6RMv10007980m	PTHR12553	RIBONUCLEASE Z	GO SLIM	GO:0016787	hydrolase activity
NA_ROR2_TeperekTkacz201206_XENLA_00120587	0.242003	5.81865	6.98904	0.00820105	0.233915	NA_ROR2_TeperekTkacz201206_XENLA_00120587	PTHR24416	TYROSINE-PROTEIN KINASE RECEPTOR	GO SLIM	GO:0016740	transferase activity
NA_NM_001088331.1	0.236881	7.83719	6.98342	0.00822683	0.234286	NA	NA	NA	NA	NA	NA
NA_CDCA5_Taira201203_XENLA_tissue_00182617	0.251927	4.42648	6.97972	0.00824386	0.234407	NA	NA	NA	NA	NA	NA
Emid1_NM_001086372.1	0.324469	2.1884	6.9746	0.00826749	0.234715	NA	NA	NA	NA	NA	NA
Tfrc_TFRC_Kwon201107_XENLA_00040804	0.280406	3.05518	6.96751	0.0083003	0.234831	Tfrc_TFRC_Kwon201107_XENLA_00040804	PTHR10404	N-ACETYLATED-ALPHA-LINKED ACIDIC DIPEPTIDASE	GO SLIM	GO:0016787	hydrolase activity
NA_NA_XeXenL6RMv10033307m	-0.273013	3.39816	6.96458	0.00831391	0.234831	NA_NA_XeXenL6RMv10033307m	PTHR24103:SF74	SUBFAMILY NOT NAMED	GO SLIM	GO:0016874	ligase activity
NA_DQ096930.1	0.252924	4.53224	6.96274	0.00832245	0.234831	NA	NA	NA	NA	NA	NA
NA_CCDC15_Taira201203_XENLA_tissue_00003493	0.314445	2.00622	6.96266	0.00832281	0.234831	NA	NA	NA	NA	NA	NA
NA_BC130177.1	-0.268569	3.39198	6.95032	0.00838043	0.235949	NA_BC130177.1	PTHR11685:SF5	RING FINGER PROTEIN 19 (DORFIN) (DOUBLE RING-FINGER PROTEIN)	GO SLIM	GO:0019538	protein metabolic process
Ccny_CCNY_Quigley201112_XENLA_00096872	-0.310439	1.91193	6.94867	0.00838817	0.235949	NA	NA	NA	NA	NA	NA
Phactr1_NM_001092759.1	0.296117	2.57609	6.93738	0.00844128	0.236774	Phactr1_NM_001092759.1	PTHR12751	PHOSPHATASE AND ACTIN REGULATOR (PHACTR)	GO SLIM	GO:0005515	protein binding
Dnajb9_DNAJB9_TeperekTkacz201206_XENLA_00121849	0.300313	2.41192	6.93294	0.00846225	0.236774	Dnajb9_DNAJB9_TeperekTkacz201206_XENLA_00121849	PTHR24077	FAMILY NOT NAMED	Panther Class	PC00072	chaperone
NA_BC077701.1	0.316869	2.01943	6.92991	0.00847661	0.236774	NA_BC077701.1	PTHR23065	PROLINE-SERINE-THREONINE PHOSPHATASE INTERACTING PROTEIN 1	GO SLIM	GO:0005198	structural molecule activity
NA_KIF11_XeXenL6RMv10028561m	0.245551	4.94432	6.92987	0.00847679	0.236774	NA_KIF11_XeXenL6RMv10028561m	PTHR24115	FAMILY NOT NAMED	GO SLIM	GO:0003777	microtubule motor activity
NA_KIAA0247_TeperekTkacz201206_XENLA_00116800	0.241582	5.56472	6.92579	0.00849616	0.236774	NA_KIAA0247_TeperekTkacz201206_XENLA_00116800	PTHR19325:SF6	COMPLEMENT COMPONENT-RELATED SUSHI DOMAIN-CONTAINING	GO SLIM	GO:0050896	response to stimulus
NA_PPFIBP2_TC432068	-0.247639	4.60258	6.92414	0.00850397	0.236774	NA_PPFIBP2_TC432068	PTHR12587	LAR INTERACTING PROTEIN (LIP)-RELATED PROTEIN	GO SLIM	GO:0006605	protein targeting
NA_PDPK1_XeXenL6RMv10048841m	0.263593	3.55561	6.92333	0.00850786	0.236774	NA	NA	NA	NA	NA	NA
NA_NOVA2_Ismailoglu201203_XENLA_00023819	0.273668	3.21142	6.91745	0.00853586	0.237138	NA_NOVA2_Ismailoglu201203_XENLA_00023819	PTHR10288	KH DOMAIN CONTAINING RNA BINDING PROTEIN	GO SLIM	GO:0031202	RNA splicing factor activity, transesterification mechanism
NA_SSR3_Ismailoglu201203_XENLA_00059223	0.23855	6.31781	6.91498	0.00854764	0.237138	NA_SSR3_Ismailoglu201203_XENLA_00059223	PTHR13399	TRANSLOCON-ASSOCIATED PROTEIN (TRAP), GAMMA SUBUNIT	GO SLIM	GO:0006886	intracellular protein transport
Zfp185_NA_Taira201203_XENLA_tissue_00110593	0.333954	1.78097	6.91246	0.00855973	0.237138	NA	NA	NA	NA	NA	NA
Ntng2_NTNG2_Ismailoglu201203_XENLA_00016262	-0.32518	1.769	6.8974	0.00863214	0.238783	NA	NA	NA	NA	NA	NA
Ctps_NM_001094750.1	0.254649	4.03861	6.89001	0.00866786	0.239214	Ctps_NM_001094750.1	PTHR11550	CTP SYNTHASE	GO SLIM	GO:0016874	ligase activity
NA_RPSA_XeXenL6RMv10023558m	0.277048	3.08972	6.88729	0.00868109	0.239214	NA	NA	NA	NA	NA	NA
NA_TPM4_TC451679	-0.27093	3.14543	6.88611	0.00868682	0.239214	NA	NA	NA	NA	NA	NA
Fstl1_FSTL1_Taira201203_XENLA_tissue_00055143	0.316237	3.22463	6.87746	0.00872894	0.239592	Fstl1_FSTL1_Taira201203_XENLA_tissue_00055143	PTHR10913:SF13	FOLLISTATIN-RELATED PROTEIN 1 (FOLLISTATIN-LIKE 1)	GO SLIM	GO:0005515	protein binding
NA_SPTSSB_Taira201203_XENLA_stage_00037478	-0.37455	0.777741	6.87667	0.00873282	0.239592	NA	NA	NA	NA	NA	NA
NA_NM_001094662.1	0.313151	1.88551	6.87469	0.0087425	0.239592	NA_NM_001094662.1	PTHR12112	BCL2/ADENOVIRUS E1B 19-KDA PROTEIN-INTERACTING PROTEIN	GO SLIM	GO:0006915	apoptosis
Ror2_ROR2_Ismailoglu201203_XENLA_00023044	0.235776	6.95209	6.87258	0.00875282	0.239592	Ror2_ROR2_Ismailoglu201203_XENLA_00023044	PTHR24416	TYROSINE-PROTEIN KINASE RECEPTOR	GO SLIM	GO:0016740	transferase activity
NA_VPS4B_TeperekTkacz201206_XENLA_00004036	0.289766	2.67611	6.86748	0.00877783	0.239919	NA_VPS4B_TeperekTkacz201206_XENLA_00004036	PTHR23074	AAA ATPASE	GO SLIM	GO:0016787	hydrolase activity
NA_SEMA6D_Taira201203_XENLA_tissue_00251678	-0.239271	5.77508	6.85994	0.00881495	0.240261	NA_SEMA6D_Taira201203_XENLA_tissue_00251678	PTHR11036	SEMAPHORIN	GO SLIM	GO:0005515	protein binding
NA_BTRC_Quigley201207_XENLA_00046278	-0.273432	2.98136	6.85759	0.00882656	0.240261	NA_BTRC_Quigley201207_XENLA_00046278	PTHR22844:SF10	F-BOX AND WD-40 DOMAIN PROTEIN 1	GO SLIM	GO:0016874	ligase activity
Nfat5_NFAT5_Taira201203_XENLA_stage_00083950	-0.321416	1.64728	6.85663	0.00883129	0.240261	Nfat5_NFAT5_Taira201203_XENLA_stage_00083950	PTHR12533	NFAT	GO SLIM	GO:0003676	nucleic acid binding
NA_DKFZP761E198_TeperekTkacz201206_XENLA_00054808	0.33261	1.36528	6.85431	0.00884275	0.240261	NA	NA	NA	NA	NA	NA
NA_HPS3_Taira201203_XENLA_stage_00008369	0.257705	3.99813	6.83603	0.0089337	0.242269	NA	NA	NA	NA	NA	NA
NA_GOLGA1_Ismailoglu201203_XENLA_00012273	-0.248231	4.48082	6.83416	0.00894309	0.242269	NA	NA	NA	NA	NA	NA
NA_FBXL3_Quigley201207_XENLA_00066542	0.337148	1.29841	6.82525	0.00898782	0.243122	NA	NA	NA	NA	NA	NA
NA_NM_001086084.1	0.247074	4.92571	6.81878	0.00902044	0.243613	NA_NM_001086084.1	PTHR11984:SF42	SUBFAMILY NOT NAMED	GO SLIM	GO:0005243	gap junction channel activity
NA_MESPB_TeperekTkacz201206_XENLA_00069338	-0.253163	4.13218	6.81468	0.00904114	0.243613	NA	NA	NA	NA	NA	NA
NA_SELS_Taira201203_XENLA_stage_00089402	0.264498	3.88479	6.8133	0.00904811	0.243613	NA	NA	NA	NA	NA	NA
NA_BC070585.1	-0.258572	4.22287	6.81055	0.00906208	0.243613	NA_BC070585.1	PTHR22599	MPS ONE BINDER KINASE ACTIVATOR-LIKE (MOB)	GO SLIM	GO:0005515	protein binding
Sephs1_NM_001086490.1	0.332821	1.88937	6.80852	0.00907238	0.243613	Sephs1_NM_001086490.1	PTHR10256	SELENIDE, WATER DIKINASE	GO SLIM	GO:0016740	transferase activity
NA_FAM195A_Taira201203_XENLA_stage_00209587	-0.297618	2.31578	6.7944	0.00914445	0.245189	NA	NA	NA	NA	NA	NA
Acsm3_NM_001092901.1	0.319693	2.27527	6.78749	0.00917987	0.245779	Acsm3_NM_001092901.1	PTHR24095:SF39	SUBFAMILY NOT NAMED	GO SLIM	GO:0003824	catalytic activity
NA_RFWD2_XeXenL6RMv10000571m	-0.300806	2.2107	6.78277	0.00920419	0.246071	NA_RFWD2_XeXenL6RMv10000571m	PTHR22847:SF14	UBIQUITIN LIGASE PROTEIN COP1 (CONSTITUTIVE PHOTOMORPHOGENESIS PROTEIN 1) (HCOP1)	GO SLIM	GO:0016874	ligase activity
NA_NA_Kwon201107_XENLA_00106438	0.363554	1.00207	6.77989	0.00921905	0.24611	NA_NA_Kwon201107_XENLA_00106438	PTHR10108:SF26	METHLYTRANSFERASE, UBIE/COQ5 FAMILY	GO SLIM	GO:0008168	methyltransferase activity
Mcm3_NA_Taira201203_XENLA_stage_00115332	0.234441	6.75304	6.76939	0.00927343	0.247202	Mcm3_NA_Taira201203_XENLA_stage_00115332	PTHR11630:SF46	DNA REPLICATION LICENSING FACTOR MCM3	GO SLIM	GO:0016787	hydrolase activity
Mug-ps1_DQ096851.1	0.232298	8.408	6.76662	0.00928785	0.247227	Mug-ps1_DQ096851.1	PTHR11412:SF36	ALPHA-MACROGLOBULIN	GO SLIM	GO:0004867	serine-type endopeptidase inhibitor activity
Dars_DARS_TC418870	0.273947	3.10582	6.76255	0.00930904	0.247432	Dars_DARS_TC418870	PTHR22594:SF10	SUBFAMILY NOT NAMED	GO SLIM	GO:0016874	ligase activity
AW549877_BC081195.1	0.288579	2.51999	6.73585	0.00944941	0.250799	NA	NA	NA	NA	NA	NA
NA_FMNL2_Taira201203_XENLA_tissue_00216935	0.341936	1.64008	6.72845	0.00948869	0.251311	NA_FMNL2_Taira201203_XENLA_tissue_00216935	PTHR23213	FORMIN-RELATED	GO SLIM	GO:0008092	cytoskeletal protein binding
NA_ARHGAP27_Taira201203_XENLA_stage_00070031	-0.324294	1.56535	6.72605	0.00950147	0.251311	NA_ARHGAP27_Taira201203_XENLA_stage_00070031	PTHR23181	RHO GTPASE ACTIVATING PROTEIN	GO SLIM	GO:0005083	small GTPase regulator activity
NA_TBC1D30_Kwon201107_XENLA_00025127	-0.286686	2.39598	6.72449	0.00950979	0.251311	NA_TBC1D30_Kwon201107_XENLA_00025127	PTHR22957:SF20	UNCHARACTERIZED	GO SLIM	GO:0005515	protein binding
Fut1_FUT1_Kwon201107_XENLA_00117946	-0.254541	3.83177	6.71786	0.0095452	0.251883	Fut1_FUT1_Kwon201107_XENLA_00117946	PTHR11927	GALACTOSIDE 2-L-FUCOSYLTRANSFERASE	GO SLIM	GO:0016740	transferase activity
NA_ST6GALNAC2_Horb201201_XENLA_00171717	0.268554	3.41711	6.71246	0.00957415	0.251991	NA_ST6GALNAC2_Horb201201_XENLA_00171717	PTHR13713	SIALYLTRANSFERASE	GO SLIM	GO:0016740	transferase activity
NA_NA_Quigley201207_XENLA_00103616	0.231809	7.99771	6.71198	0.00957674	0.251991	NA	NA	NA	NA	NA	NA
Phactr2_PHACTR2_XeXenL6RMv10027623m	0.322879	1.60514	6.70173	0.00963197	0.253081	Phactr2_PHACTR2_XeXenL6RMv10027623m	PTHR12751	PHOSPHATASE AND ACTIN REGULATOR (PHACTR)	GO SLIM	GO:0005515	protein binding
Fam83g_FAM83G_Park201106_XENLA_00032339	-0.293395	2.26123	6.68624	0.00971597	0.254383	NA	NA	NA	NA	NA	NA
NA_TMPRSS9_Taira201203_XENLA_stage_00111976	-0.255967	4.01928	6.68442	0.0097259	0.254383	NA_TMPRSS9_Taira201203_XENLA_stage_00111976	PTHR24256	TRANSMEMBRANE PROTEASE, SERINE	GO SLIM	GO:0016787	hydrolase activity
NA_MAP1LC3A_Amin201106_XENLA_00042927	0.254963	4.20482	6.68329	0.00973208	0.254383	NA_MAP1LC3A_Amin201106_XENLA_00042927	PTHR10969	MICROTUBULE-ASSOCIATED PROTEINS 1A/1B LIGHT CHAIN 3-RELATED	GO SLIM	GO:0008092	cytoskeletal protein binding
NA_SNX30_Taira201203_XENLA_tissue_00227883	-0.26714	3.03269	6.68008	0.00974964	0.254383	NA_SNX30_Taira201203_XENLA_tissue_00227883	PTHR10555	SORTING NEXIN	GO SLIM	GO:0006605	protein targeting
Snrnp35_NM_001096941.1	-0.239585	5.04485	6.67985	0.00975087	0.254383	Snrnp35_NM_001096941.1	PTHR13952	U1 SMALL NUCLEAR RIBONUCLEOPROTEIN 70 KD	GO SLIM	GO:0031202	RNA splicing factor activity, transesterification mechanism
Ythdc2_YTHDC2_XeXenL6RMv10049207m	0.278983	2.67531	6.67127	0.00979793	0.255247	Ythdc2_YTHDC2_XeXenL6RMv10049207m	PTHR18934	ATP-DEPENDENT RNA HELICASE	GO SLIM	GO:0003676	nucleic acid binding
Pdlim4_BC082415.1	0.26276	3.45171	6.66672	0.009823	0.255537	Pdlim4_BC082415.1	PTHR24214	FAMILY NOT NAMED	GO SLIM	GO:0005198	structural molecule activity
NA_AF550004.1	-0.260481	3.5271	6.66002	0.00985999	0.256136	NA_AF550004.1	PTHR12477	SYNOVIOLIN-RELATED	GO SLIM	GO:0016874	ligase activity
Tubgcp4_NM_001094148.1	0.302913	1.9888	6.64416	0.00994814	0.258061	Tubgcp4_NM_001094148.1	PTHR19302	GAMMA TUBULIN COMPLEX PROTEIN	GO SLIM	GO:0008092	cytoskeletal protein binding
Sik3_SIK3_Park201106_XENLA_00084429	0.263357	3.32841	6.63658	0.00999054	0.258632	Sik3_SIK3_Park201106_XENLA_00084429	PTHR24343:SF56	SUBFAMILY NOT NAMED	GO SLIM	GO:0016740	transferase activity
NA_PLEKHA5_XeXenL6RMv10041881m	-0.246559	4.36496	6.63519	0.00999835	0.258632	NA	NA	NA	NA	NA	NA
NA_SMARCD2_Amin201106_XENLA_00088773	-0.251795	3.8004	6.62664	0.0100465	0.259278	NA_SMARCD2_Amin201106_XENLA_00088773	PTHR13844	BRG-1 ASSOCIATED FACTOR 60 (BAF60)	GO SLIM	GO:0003676	nucleic acid binding
Dennd2c_DENND2C_Taira201203_XENLA_stage_00125967	0.245894	4.58861	6.62573	0.0100516	0.259278	NA	NA	NA	NA	NA	NA
NA_ARHGAP10_Kwon201107_XENLA_00006536	-0.235244	5.51852	6.61893	0.01009	0.259904	NA_ARHGAP10_Kwon201107_XENLA_00006536	PTHR12552	OLIGOPHRENIN 1	GO SLIM	GO:0005083	small GTPase regulator activity
Cluap1_CLUAP1_Taira201203_XENLA_tissue_00255479	-0.245881	4.34984	6.60822	0.0101509	0.260911	NA	NA	NA	NA	NA	NA
NA_MICAL3_Taira201203_XENLA_tissue_00115914	-0.323655	1.728	6.60602	0.0101634	0.260911	NA	NA	NA	NA	NA	NA
NA_GNG7_Ismailoglu201203_XENLA_00029571	0.243058	4.67747	6.60455	0.0101718	0.260911	NA_GNG7_Ismailoglu201203_XENLA_00029571	PTHR13809	GUANINE NUCLEOTIDE-BINDING PROTEIN GAMMA SUBUNIT	GO SLIM	GO:0016787	hydrolase activity
Mex3c_MEX3C_Quigley201207_XENLA_00092989	-0.23563	5.57519	6.59899	0.0102037	0.261259	Mex3c_MEX3C_Quigley201207_XENLA_00092989	PTHR23285	RING FINGER AND KH DOMAIN CONTAINING PROTEIN 1	GO SLIM	GO:0016874	ligase activity
NA_KIF26A_XeXenL6RMv10007658m	0.328751	1.57626	6.5972	0.0102139	0.261259	NA_KIF26A_XeXenL6RMv10007658m	PTHR24115	FAMILY NOT NAMED	GO SLIM	GO:0003777	microtubule motor activity
NA_FUT6_TC421707	0.285696	2.44059	6.59124	0.0102482	0.261772	NA_FUT6_TC421707	PTHR11929	ALPHA-(1,3)-FUCOSYLTRANSFERASE	GO SLIM	GO:0016740	transferase activity
A2m_NM_001172060.1	0.228992	8.37318	6.58716	0.0102717	0.262007	A2m_NM_001172060.1	PTHR11412:SF36	ALPHA-MACROGLOBULIN	GO SLIM	GO:0004867	serine-type endopeptidase inhibitor activity
NA_PRUNE_Taira201203_XENLA_tissue_00087285	-0.270978	2.89194	6.57577	0.0103376	0.263065	NA	NA	NA	NA	NA	NA
Trdmt1_TRDMT1_Taira201203_XENLA_stage_00069901	0.280507	2.55845	6.57504	0.0103419	0.263065	Trdmt1_TRDMT1_Taira201203_XENLA_stage_00069901	PTHR10629	CYTOSINE-SPECIFIC METHYLTRANSFERASE	GO SLIM	GO:0003676	nucleic acid binding
NA_NA_XeXenL6RMv10022254m	0.258704	3.76167	6.57227	0.010358	0.26311	NA_NA_XeXenL6RMv10022254m	PTHR13140:SF18	MYOSIN X	GO SLIM	GO:0003774	motor activity
NA_LMBRD2_XeXenL6RMv10035708m	-0.295796	2.05197	6.56231	0.0104161	0.263779	NA	NA	NA	NA	NA	NA
Hmgcl_NM_001091683.1	0.334258	1.35262	6.5623	0.0104161	0.263779	Hmgcl_NM_001091683.1	PTHR10277	HOMOCITRATE SYNTHASE-RELATED	GO SLIM	GO:0016829	lyase activity
Trpm4_BC056004.1	0.301773	1.98287	6.56035	0.0104276	0.263779	Trpm4_BC056004.1	PTHR13800	TRANSIENT RECEPTOR POTENTIAL CATION CHANNEL, SUBFAMILY M, MEMBER 6	GO SLIM	GO:0004872	receptor activity
NA_ATP6AP2_Chung201110_XENLA_00063279	0.235649	5.47097	6.55791	0.0104419	0.263779	NA_ATP6AP2_Chung201110_XENLA_00063279	PTHR13351	RENIN RECEPTOR	GO SLIM	GO:0004872	receptor activity
NA_NM_001088367.1	0.264698	3.55985	6.54534	0.0105159	0.264671	NA_NM_001088367.1	PTHR11829	FAMILY NOT NAMED	GO SLIM	GO:0003676	nucleic acid binding
Bcorl1_BCORL1_Taira201203_XENLA_stage_00189108	0.240643	4.59573	6.54124	0.0105402	0.264671	NA	NA	NA	NA	NA	NA
Bcas3_BCAS3_Taira201203_XENLA_tissue_00234896	-0.262878	3.2463	6.54108	0.0105411	0.264671	NA	NA	NA	NA	NA	NA
NA_BC081096.1	0.234863	5.55808	6.53919	0.0105524	0.264671	NA_BC081096.1	PTHR11550	CTP SYNTHASE	GO SLIM	GO:0016874	ligase activity
NA_NRD1_XeXenL6RMv10008665m	0.323945	1.89604	6.53822	0.0105581	0.264671	NA_NRD1_XeXenL6RMv10008665m	PTHR11851:SF65	NARDILYSIN PRECURSOR (N-ARGININE DIBASIC CONVERTASE) (NRD CONVERTASE)	GO SLIM	GO:0016787	hydrolase activity
Mab21l2_NM_001090271.1	0.288375	2.71176	6.53727	0.0105638	0.264671	NA	NA	NA	NA	NA	NA
NA_RND1_Kwon201107_XENLA_00031226	0.230065	7.46388	6.53213	0.0105943	0.265074	NA	NA	NA	NA	NA	NA
D8Ertd82e_SGK223_Ismailoglu201203_XENLA_00013157	0.231781	6.13914	6.52639	0.0106285	0.265569	D8Ertd82e_SGK223_Ismailoglu201203_XENLA_00013157	PTHR22972	SERINE/THREONINE PROTEIN KINASE	GO SLIM	GO:0004675	transmembrane receptor protein serine/threonine kinase activity
Gstcd_NM_001093309.1	-0.23474	5.28474	6.52203	0.0106547	0.265859	NA	NA	NA	NA	NA	NA
NA_GCNT1_Taira201203_XENLA_tissue_00003376	-0.330797	1.35938	6.50189	0.010776	0.268522	NA_GCNT1_Taira201203_XENLA_tissue_00003376	PTHR19297:SF9	BETA-1,3-GALACTOSYL-O-GLYCOSYL-GLYCOPROTEIN BETA-1,6-N- ACETYLGLUCOSAMINYLTRANSFERASE	GO SLIM	GO:0016740	transferase activity
AI661453_NA_Kwon201107_XENLA_00028414	0.283051	2.44742	6.49253	0.0108329	0.269573	NA	NA	NA	NA	NA	NA
Zfp438_ZNF438_XeXenL6RMv10026903m	0.354906	0.859128	6.48823	0.0108591	0.269859	Zfp438_ZNF438_XeXenL6RMv10026903m	PTHR24397	FAMILY NOT NAMED	GO SLIM	GO:0003676	nucleic acid binding
Tubb4b_NM_001087097.1	0.226564	8.292	6.47203	0.0109585	0.271484	NA	NA	NA	NA	NA	NA
NA_ANKRD52_Kwon201107_XENLA_00088441	0.277675	2.89925	6.46542	0.0109994	0.271484	NA	NA	NA	NA	NA	NA
Fam193b_FAM193B_TeperekTkacz201202_XENLA_00103347	0.270128	2.78192	6.46524	0.0110005	0.271484	NA	NA	NA	NA	NA	NA
NA_TNKS2_Park201106_XENLA_00033822	0.258081	3.28832	6.46506	0.0110016	0.271484	NA_TNKS2_Park201106_XENLA_00033822	PTHR24180	FAMILY NOT NAMED	GO SLIM	GO:0016740	transferase activity
NA_TUBGCP2_TC424982	0.301757	2.02458	6.46181	0.0110217	0.271484	NA_TUBGCP2_TC424982	PTHR19302	GAMMA TUBULIN COMPLEX PROTEIN	GO SLIM	GO:0008092	cytoskeletal protein binding
Arid1b_ARID1B_Taira201203_XENLA_tissue_00207606	0.345754	1.31067	6.45957	0.0110356	0.271484	Arid1b_ARID1B_Taira201203_XENLA_tissue_00207606	PTHR12656	BRG-1 ASSOCIATED FACTOR 250 (BAF250)	GO SLIM	GO:0003676	nucleic acid binding
NA_NM_001086769.1	0.287341	2.53516	6.45889	0.0110399	0.271484	NA	NA	NA	NA	NA	NA
NA_SPAG1_Taira201203_XENLA_tissue_00160271	-0.285924	2.26955	6.4584	0.0110429	0.271484	NA_SPAG1_Taira201203_XENLA_tissue_00160271	PTHR22904:SF31	TRANSLOCASE OF OUTER MITOCHONDRIAL MEMBRANE 34	GO SLIM	GO:0019538	protein metabolic process
Dnajb1_DNAJB1_Park201106_XENLA_00101765	-0.258242	3.34057	6.45141	0.0110864	0.272188	Dnajb1_DNAJB1_Park201106_XENLA_00101765	PTHR24077	FAMILY NOT NAMED	Panther Class	PC00072	chaperone
Zfp800_ZNF800_Kwon201107_XENLA_00069622	0.257634	3.31386	6.43883	0.0111652	0.273757	NA	NA	NA	NA	NA	NA
Fancm_NA_Taira201203_XENLA_tissue_00129723	0.264487	2.96087	6.42467	0.0112546	0.275472	NA	NA	NA	NA	NA	NA
NA_RASSF8_Amin201106_XENLA_00018179	-0.32684	1.72471	6.42073	0.0112796	0.275472	NA	NA	NA	NA	NA	NA
NA_GTF2H5_Audic201207_XENLA_00002205	-0.268788	2.86499	6.42063	0.0112802	0.275472	NA	NA	NA	NA	NA	NA
Mpzl2_MPZL2_TC414539	0.244804	4.1035	6.41458	0.0113187	0.276045	Mpzl2_MPZL2_TC414539	PTHR13869:SF12	MYELIN PROTEIN ZERO-LIKE PROTEIN 2	GO SLIM	GO:0007155	cell adhesion
NA_CKMT1B_Taira201203_XENLA_stage_00069915	0.261679	3.56843	6.40375	0.011388	0.277176	NA	NA	NA	NA	NA	NA
NA_SP7_Kwon201107_XENLA_00096283	0.259033	3.5326	6.4026	0.0113953	0.277176	NA_SP7_Kwon201107_XENLA_00096283	PTHR23223	KRUEPPEL C2H2-TYPE ZINC-FINGER	GO SLIM	GO:0003676	nucleic acid binding
NA_RBMS2_Ismailoglu201203_XENLA_00022456	0.249424	4.04528	6.39896	0.0114187	0.277377	NA_RBMS2_Ismailoglu201203_XENLA_00022456	PTHR24011:SF36	SUBFAMILY NOT NAMED	GO SLIM	GO:0003676	nucleic acid binding
NA_NA_Taira201203_XENLA_tissue_00266127	-0.268421	3.31039	6.39163	0.011466	0.278156	NA	NA	NA	NA	NA	NA
NA_LIN9_Ismailoglu201203_XENLA_00019645	-0.230049	5.83311	6.38837	0.0114871	0.278299	NA_LIN9_Ismailoglu201203_XENLA_00019645	PTHR21689	LIN-9	GO SLIM	GO:0003676	nucleic acid binding
NA_NM_001086259.1	0.231097	5.84243	6.38182	0.0115295	0.278959	NA_NM_001086259.1	PTHR13399	TRANSLOCON-ASSOCIATED PROTEIN (TRAP), GAMMA SUBUNIT	GO SLIM	GO:0006886	intracellular protein transport
NA_FZD8_TeperekTkacz201202_XENLA_00045724	0.263485	3.2163	6.3731	0.0115863	0.279965	NA	NA	NA	NA	NA	NA
NA_RANBP2_Quigley201112_XENLA_00133573	0.239413	4.56486	6.36635	0.0116304	0.280661	NA_RANBP2_Quigley201112_XENLA_00133573	PTHR23138:SF8	RAN-BINDING PROTEIN 2	GO SLIM	GO:0005083	small GTPase regulator activity
Gapdh_NP_001004949.1_TC438210	0.234002	5.42939	6.36027	0.0116703	0.280963	Gapdh_NP_001004949.1_TC438210	PTHR10836	GLYCERALDEHYDE 3-PHOSPHATE DEHYDROGENASE	GO SLIM	GO:0016491	oxidoreductase activity
NA_NM_001095101.1	0.295278	1.99667	6.35574	0.0117002	0.280963	NA_NM_001095101.1	PTHR13820	SYNUCLEIN	GO SLIM	GO:0007154	cell communication
Dedd2_NM_001095246.1	0.309487	1.81992	6.35549	0.0117019	0.280963	NA	NA	NA	NA	NA	NA
Nkain1_NKAIN1_Park201106_XENLA_00129369	-0.275368	2.63515	6.35513	0.0117042	0.280963	NA	NA	NA	NA	NA	NA
Ednra_NM_001097688.1	-0.267521	2.98798	6.3499	0.0117388	0.281424	NA	NA	NA	NA	NA	NA
NA_ETV6_Ismailoglu201203_XENLA_00007897	-0.236861	4.76255	6.343	0.0117846	0.282152	NA_ETV6_Ismailoglu201203_XENLA_00007897	PTHR11849:SF19	TEL	GO SLIM	GO:0003676	nucleic acid binding
Cep120_CEP120_TeperekTkacz201202_XENLA_00103536	-0.229235	5.8686	6.3399	0.0118052	0.282277	NA	NA	NA	NA	NA	NA
Chrd_CHRD_XeXenL6RMv10014175m	0.224424	8.38388	6.31897	0.0119453	0.28485	NA	NA	NA	NA	NA	NA
Gtf2ird2_NA_Taira201203_XENLA_stage_00031421	0.254605	3.36066	6.31758	0.0119546	0.28485	Gtf2ird2_NA_Taira201203_XENLA_stage_00031421	PTHR11697:SF6	UNCHARACTERIZED	GO SLIM	GO:0003676	nucleic acid binding
Garem_NM_001091422.1	0.300374	1.93589	6.31406	0.0119784	0.28485	NA	NA	NA	NA	NA	NA
Wee1_WEE1_XeXenL6RMv10004613m	0.226442	6.70707	6.31039	0.0120032	0.28485	Wee1_WEE1_XeXenL6RMv10004613m	PTHR11042	EUKARYOTIC TRANSLATION INITIATION FACTOR 2-ALPHA KINASE (EIF2-ALPHA KINASE)-RELATED	GO SLIM	GO:0016740	transferase activity
Cuedc1_NM_001086219.1	-0.258745	3.09462	6.30969	0.012008	0.28485	NA	NA	NA	NA	NA	NA
NA_SESN2_Taira201203_XENLA_tissue_00113774	0.267382	2.93019	6.30955	0.0120089	0.28485	NA_SESN2_Taira201203_XENLA_tissue_00113774	PTHR12474	P53 REGULATED PA26 NUCLEAR PROTEIN SESTRIN	GO SLIM	GO:0004601	peroxidase activity
NA_WFS1_XeXenL6RMv10002294m	0.244541	4.19416	6.3077	0.0120215	0.28485	NA_WFS1_XeXenL6RMv10002294m	PTHR13098	WOLFRAMIN	GO SLIM	GO:0050877	neurological system process
NA_NM_001087867.1	0.245275	4.10231	6.30482	0.012041	0.284945	NA_NM_001087867.1	PTHR10666	UBIQUITIN	GO SLIM	GO:0003735	structural constituent of ribosome
Rwdd2b_RWDD2B_Ismailoglu201203_XENLA_00015520	-0.345235	0.942826	6.28938	0.0121464	0.287068	Rwdd2b_RWDD2B_Ismailoglu201203_XENLA_00015520	PTHR15955	RWD DOMAIN CONTAINING PROTEIN 2	Panther Class	PC00121	hydrolase
Gadd45g_NM_001090459.1	0.233127	5.30131	6.28373	0.0121851	0.287612	Gadd45g_NM_001090459.1	PTHR10411:SF4	GROWTH ARREST AND DNA DAMAGE-INDUCIBLE PROTEIN GADD45 GAMMA	GO SLIM	GO:0006915	apoptosis
Ppfibp2_PPFIBP2_XeXenL6RMv10014898m	-0.242604	4.08419	6.28117	0.0122028	0.287659	Ppfibp2_PPFIBP2_XeXenL6RMv10014898m	PTHR12587	LAR INTERACTING PROTEIN (LIP)-RELATED PROTEIN	GO SLIM	GO:0006605	protein targeting
Traf4_TRAF4_Taira201203_XENLA_tissue_00033689	0.227593	6.74508	6.26774	0.0122956	0.289475	Traf4_TRAF4_Taira201203_XENLA_tissue_00033689	PTHR10131	TNF RECEPTOR ASSOCIATED FACTOR	GO SLIM	GO:0005515	protein binding
NA_NANS_Taira201203_XENLA_tissue_00047096	0.24291	4.18123	6.26368	0.0123238	0.289768	NA_NANS_Taira201203_XENLA_tissue_00047096	PTHR23416	SIALIC ACID SYNTHASE-RELATED	GO SLIM	GO:0003824	catalytic activity
Actr2_NM_001095724.1	0.228561	5.64829	6.25921	0.012355	0.290128	Actr2_NM_001095724.1	PTHR11937	ACTIN	GO SLIM	GO:0005198	structural molecule activity
Twsg1_NM_001086401.1	-0.2442	3.89011	6.25575	0.0123791	0.290194	NA	NA	NA	NA	NA	NA
Ptk2_L33920.1	-0.233641	4.869	6.25427	0.0123894	0.290194	Ptk2_L33920.1	PTHR24418	TYROSINE-PROTEIN KINASE	GO SLIM	GO:0016740	transferase activity
NA_NM_001085997.1	0.227634	6.15195	6.24977	0.0124209	0.290505	NA	NA	NA	NA	NA	NA
NA_TTC17_Taira201203_XENLA_tissue_00020567	-0.293626	2.13259	6.24785	0.0124344	0.290505	NA	NA	NA	NA	NA	NA
Kcnk6_KCNK6_TeperekTkacz201206_XENLA_00071471	0.229562	5.57901	6.24161	0.0124783	0.291161	Kcnk6_KCNK6_TeperekTkacz201206_XENLA_00071471	PTHR11003:SF27	POTASSIUM CHANNEL SUBFAMILY K MEMBER 1 (INWARD RECTIFYING POTASSIUM CHANNEL PROTEIN TWIK-1)	GO SLIM	GO:0005261	cation channel activity
Cox20_NM_001095885.1	0.238189	4.57203	6.23677	0.0125124	0.291326	NA	NA	NA	NA	NA	NA
Fdx1l_NM_001096513.1	-0.295658	2.00758	6.23486	0.012526	0.291326	Fdx1l_NM_001096513.1	PTHR23426:SF1	ADRENODOXIN	GO SLIM	GO:0016491	oxidoreductase activity
Churc1_CHURC1_Quigley201112_XENLA_00023008	0.323385	1.44383	6.23386	0.0125331	0.291326	NA	NA	NA	NA	NA	NA
NA_TBC1D30_XeXenL6RMv10013321m	-0.316824	1.4289	6.22175	0.012619	0.292953	NA_TBC1D30_XeXenL6RMv10013321m	PTHR22957:SF20	UNCHARACTERIZED	GO SLIM	GO:0005515	protein binding
NA_SCAP_XeXenL6RMv10025774m	-0.300568	2.04505	6.21732	0.0126507	0.293316	NA_SCAP_XeXenL6RMv10025774m	PTHR10796	PATCHED-RELATED	GO SLIM	GO:0004872	receptor activity
NA_DQ096895.1	-0.22355	7.25026	6.20741	0.0127216	0.29459	NA	NA	NA	NA	NA	NA
NA_TMF1_XeXenL6RMv10020467m	-0.239258	4.15051	6.20509	0.0127383	0.294604	NA	NA	NA	NA	NA	NA
NA_PHOX2B_XeXenL6RMv10050188m	-0.319922	1.52016	6.19738	0.0127939	0.295426	NA_PHOX2B_XeXenL6RMv10050188m	PTHR24329:SF107	SUBFAMILY NOT NAMED	GO SLIM	GO:0003676	nucleic acid binding
NA_NM_001096595.1	-0.232729	5.04898	6.19502	0.012811	0.295426	NA_NM_001096595.1	PTHR23223	KRUEPPEL C2H2-TYPE ZINC-FINGER	GO SLIM	GO:0003676	nucleic acid binding
Slc26a11_SLC26A11_TeperekTkacz201202_XENLA_00049624	-0.225097	6.94509	6.1918	0.0128344	0.295426	Slc26a11_SLC26A11_TeperekTkacz201202_XENLA_00049624	PTHR11814	SULFATE TRANSPORTER	GO SLIM	GO:0022857	transmembrane transporter activity
NA_AJ514937.1	0.222793	8.14357	6.19112	0.0128393	0.295426	NA_AJ514937.1	PTHR12019	LAMINA-ASSOCIATED POLYPEPTIDE (THYMOPOIETIN)	GO SLIM	GO:0005515	protein binding
NA_MORF4L1_Kwon201107_XENLA_00019660	0.23354	4.76219	6.18904	0.0128544	0.295426	NA_MORF4L1_Kwon201107_XENLA_00019660	PTHR10880	MORTALITY FACTOR 4-LIKE PROTEIN	GO SLIM	GO:0003676	nucleic acid binding
Hsp90aa1_HSP90AA1.1_Park201106_XENLA_00156051	-0.242577	5.28673	6.18423	0.0128894	0.29586	Hsp90aa1_HSP90AA1.1_Park201106_XENLA_00156051	PTHR11528	HEAT SHOCK PROTEIN 90	GO SLIM	GO:0050896	response to stimulus
Chst7_BC099026.1	-0.232441	5.25122	6.17949	0.012924	0.296282	Chst7_BC099026.1	PTHR10704	CARBOHYDRATE SULFOTRANSFERASE	GO SLIM	GO:0016740	transferase activity
NA_ENO1_XeXenL6RMv10014857m	0.22447	6.49699	6.16955	0.0129968	0.297579	NA_ENO1_XeXenL6RMv10014857m	PTHR11902	ENOLASE	GO SLIM	GO:0016829	lyase activity
Fzd5_FZD5_Ismailoglu201203_XENLA_00002341	0.300149	1.75728	6.16245	0.013049	0.298402	NA	NA	NA	NA	NA	NA
Mettl7a1_NA_Ismailoglu201203_XENLA_00015244	0.292388	2.46049	6.15839	0.013079	0.298708	Mettl7a1_NA_Ismailoglu201203_XENLA_00015244	PTHR10108:SF8	S-ADENOSYL-L- METHIONINE-DEPENDENT METHYLTRANSFERASES STRUCTURE CONTAINING PROTEIN-RELATED	GO SLIM	GO:0008168	methyltransferase activity
NA_C20H6ORF115_Taira201203_XENLA_tissue_00135249	0.294993	2.33384	6.15624	0.013095	0.298708	NA	NA	NA	NA	NA	NA
NA_KRT5.7_Taira201203_XENLA_stage_00212857	0.222637	9.01866	6.15025	0.0131393	0.299349	NA_KRT5.7_Taira201203_XENLA_stage_00212857	PTHR23239	INTERMEDIATE FILAMENT	GO SLIM	GO:0005200	structural constituent of cytoskeleton
NA_WDFY2_Taira201203_XENLA_stage_00103611	0.34445	1.31704	6.14509	0.0131777	0.299715	NA	NA	NA	NA	NA	NA
Ptgs1_PTGS1_Taira201203_XENLA_stage_00161616	0.27486	2.93422	6.1437	0.0131881	0.299715	Ptgs1_PTGS1_Taira201203_XENLA_stage_00161616	PTHR11903	PROSTAGLANDIN G/H SYNTHASE	GO SLIM	GO:0016491	oxidoreductase activity
NA_A8KBE1_XENTR_Chung201110_XENLA_00055193	-0.225717	5.92645	6.14046	0.0132123	0.299894	NA_A8KBE1_XENTR_Chung201110_XENLA_00055193	PTHR10676	DYNEIN HEAVY CHAIN FAMILY PROTEIN	GO SLIM	GO:0016787	hydrolase activity
Lace1_LACE1_Taira201203_XENLA_stage_00213618	-0.241541	3.842	6.12858	0.0133013	0.301541	Lace1_LACE1_Taira201203_XENLA_stage_00213618	PTHR12169	ATPASE N2B	GO SLIM	GO:0016787	hydrolase activity
Cct6a_NM_001092611.1	0.23977	4.16205	6.12584	0.013322	0.301547	Cct6a_NM_001092611.1	PTHR11353	CHAPERONIN	GO SLIM	GO:0019538	protein metabolic process
Mcm9_MCM9_Ismailoglu201203_XENLA_00044246	-0.242372	3.95289	6.12419	0.0133345	0.301547	Mcm9_MCM9_Ismailoglu201203_XENLA_00044246	PTHR11630:SF48	DNA REPLICATION LICENSING FACTOR MCM1	GO SLIM	GO:0016787	hydrolase activity
Tmed10_NM_001096701.1	0.226498	5.67121	6.10957	0.0134452	0.303455	Tmed10_NM_001096701.1	PTHR22811:SF6	TRANSMEMBRANE PROTEIN TMP21-RELATED	GO SLIM	GO:0006886	intracellular protein transport
NA_MAZ_Ismailoglu201203_XENLA_00002617	-0.249582	3.5347	6.10733	0.0134623	0.303455	NA_MAZ_Ismailoglu201203_XENLA_00002617	PTHR11389	ZINC FINGER PROTEIN	GO SLIM	GO:0003676	nucleic acid binding
NA_NP_001120103.1_mgEST_Xl4jul2012_1013093933	-0.263359	3.26229	6.10651	0.0134685	0.303455	NA_NP_001120103.1_mgEST_Xl4jul2012_1013093933	PTHR25069:SF90	SUBFAMILY NOT NAMED	GO SLIM	GO:0008092	cytoskeletal protein binding
NA_U17596.1	0.239881	4.00092	6.10186	0.013504	0.303881	NA_U17596.1	PTHR24011:SF55	SUBFAMILY NOT NAMED	GO SLIM	GO:0003676	nucleic acid binding
NA_ATF7IP_Taira201203_XENLA_stage_00182069	0.306894	1.73502	6.09479	0.0135581	0.304498	NA	NA	NA	NA	NA	NA
NA_VMP1_Taira201203_XENLA_tissue_00212981	-0.266351	2.82851	6.09394	0.0135646	0.304498	NA_VMP1_Taira201203_XENLA_tissue_00212981	PTHR10281	MEMBRANE-ASSOCIATED PROGESTERONE RECEPTOR COMPONENT-RELATED	GO SLIM	GO:0004872	receptor activity
Crabp2_BC106392.1	0.226832	6.19493	6.0833	0.0136466	0.305964	Crabp2_BC106392.1	PTHR11955	FATTY ACID BINDING PROTEIN	GO SLIM	GO:0008289	lipid binding
NA_TXLNG_Taira201203_XENLA_stage_00145339	-0.240837	3.80661	6.07522	0.0137091	0.306872	NA_TXLNG_Taira201203_XENLA_stage_00145339	PTHR16127	TAXILIN	GO SLIM	GO:0042742	defense response to bacterium
NA_COL17A1_TeperekTkacz201202_XENLA_00120867	0.279733	2.73755	6.07338	0.0137234	0.306872	NA	NA	NA	NA	NA	NA
Kdm4c_KDM4C_Kwon201107_XENLA_00015236	0.244523	3.68861	6.06986	0.0137508	0.306872	Kdm4c_KDM4C_Kwon201107_XENLA_00015236	PTHR10694	JUMONJI DOMAIN CONTAINING PROTEIN	GO SLIM	GO:0003676	nucleic acid binding
NA_NM_001094913.1	0.22748	5.56685	6.06944	0.013754	0.306872	NA	NA	NA	NA	NA	NA
Col18a1_NM_001088739.1	0.2965	2.33512	6.06122	0.0138183	0.30761	Col18a1_NM_001088739.1	PTHR24023:SF277	COL18A1-PROV PROTEIN	GO SLIM	GO:0005198	structural molecule activity
NA_WNT11B_Kwon201107_XENLA_00085116	0.221146	7.30008	6.06091	0.0138207	0.30761	NA_WNT11B_Kwon201107_XENLA_00085116	PTHR12027	WNT RELATED	GO SLIM	GO:0005515	protein binding
NA_COG3_Audic201207_XENLA_00003103	-0.227685	5.2802	6.05259	0.0138859	0.30868	NA_COG3_Audic201207_XENLA_00003103	PTHR13302	CONSERVED OLIGOMERIC GOLGI COMPLEX COMPONENT 3	GO SLIM	GO:0016192	vesicle-mediated transport
NA_ARHGEF15_Kwon201107_XENLA_00074987	-0.303399	1.88719	6.04898	0.0139143	0.30868	NA	NA	NA	NA	NA	NA
Slc26a9_SLC26A9_TeperekTkacz201206_XENLA_00000080	-0.257735	4.71692	6.04836	0.0139192	0.30868	Slc26a9_SLC26A9_TeperekTkacz201206_XENLA_00000080	PTHR11814	SULFATE TRANSPORTER	GO SLIM	GO:0022857	transmembrane transporter activity
Ern1_ERN1_Quigley201207_XENLA_00056460	-0.233179	4.66287	6.04508	0.0139451	0.308685	Ern1_ERN1_Quigley201207_XENLA_00056460	PTHR13954	IRE1-RELATED	GO SLIM	GO:0016740	transferase activity
NA_PRC1.2_Kwon201107_XENLA_00004143	0.2416	3.80436	6.04407	0.0139531	0.308685	NA_PRC1.2_Kwon201107_XENLA_00004143	PTHR19321	PROTEIN REGULATOR OF CYTOKINESIS 1 PRC1-RELATED	GO SLIM	GO:0008092	cytoskeletal protein binding
Itpka_ITPKA_Taira201203_XENLA_stage_00130543	0.247665	3.49633	6.03477	0.0140268	0.309941	Itpka_ITPKA_Taira201203_XENLA_stage_00130543	PTHR12400	INOSITOL POLYPHOSPHATE KINASE	GO SLIM	GO:0016740	transferase activity
Psmg4_PSMG4_mgEST_Xl4jul2012_1013112424	0.328957	1.20254	6.02873	0.0140749	0.31033	NA	NA	NA	NA	NA	NA
Enc1_ENC1_TC416767	0.225693	5.87885	6.02831	0.0140782	0.31033	NA	NA	NA	NA	NA	NA
Psmg2_NM_001086965.1	0.232376	4.44534	6.02508	0.014104	0.310487	Psmg2_NM_001086965.1	PTHR12970	TUMOR NECROSIS FACTOR SUPERFAMILY, MEMBER 5-INDUCED PROTEIN 1 (CLAST3)	GO SLIM	GO:0003676	nucleic acid binding
NA_C8G_Taira201203_XENLA_stage_00104479	0.28866	2.88779	6.02318	0.0141192	0.310487	NA	NA	NA	NA	NA	NA
NA_TRIM71_TeperekTkacz201206_XENLA_00073504	0.242915	4.10795	6.01524	0.0141829	0.311242	NA_TRIM71_TeperekTkacz201206_XENLA_00073504	PTHR24103:SF5	SUBFAMILY NOT NAMED	GO SLIM	GO:0016874	ligase activity
NA_NEDD4L_Taira201203_XENLA_tissue_00016223	-0.263285	2.76729	6.01466	0.0141875	0.311242	NA_NEDD4L_Taira201203_XENLA_tissue_00016223	PTHR11254	HECT DOMAIN UBIQUITIN-PROTEIN LIGASE	GO SLIM	GO:0016874	ligase activity
NA_NA_Quigley201112_XENLA_00052430	-0.234688	4.26576	5.99179	0.0143726	0.314914	NA	NA	NA	NA	NA	NA
NA_NM_001092295.1	0.251665	3.61676	5.98785	0.0144048	0.314914	NA	NA	NA	NA	NA	NA
Ecsit_ECSIT_Kwon201107_XENLA_00003277	-0.23627	4.11908	5.98765	0.0144064	0.314914	Ecsit_ECSIT_Kwon201107_XENLA_00003277	PTHR13113	ECSIT (EVOLUTIONARILY CONSERVED SIGNALING INTERMEDIATE IN TOLL PATHWAYS)	GO SLIM	GO:0005515	protein binding
Als2cl_ALS2CL_Taira201203_XENLA_tissue_00012048	-0.319503	1.24787	5.98092	0.0144615	0.315742	Als2cl_ALS2CL_Taira201203_XENLA_tissue_00012048	PTHR23084	PHOSPHATIDYLINOSITOL-4-PHOSPHATE 5-KINASE RELATED	GO SLIM	GO:0016740	transferase activity
Tmem48_TMEM48_Taira201203_XENLA_stage_00117922	0.243066	3.60607	5.9738	0.0145199	0.316642	NA	NA	NA	NA	NA	NA
NA_NM_001087072.1	0.259073	3.13396	5.96503	0.0145924	0.317843	NA_NM_001087072.1	PTHR10210	RIBOSE-PHOSPHATE PYROPHOSPHOKINASE	GO SLIM	GO:0016874	ligase activity
Gstm4_NM_001087371.1	0.230639	4.61435	5.96256	0.0146128	0.317911	Gstm4_NM_001087371.1	PTHR11571	GLUTATHIONE S-TRANSFERASE	GO SLIM	GO:0016740	transferase activity
NA_NM_001094585.1	0.229954	4.73228	5.93981	0.0148026	0.32161	NA	NA	NA	NA	NA	NA
Prg4_BC085205.1	-0.240943	3.85867	5.93799	0.0148179	0.32161	Prg4_BC085205.1	PTHR22917	HEMOPEXIN DOMAIN-CONTAINING PROTEIN	GO SLIM	GO:0007154	cell communication
Prnp_NM_001092722.1	0.327385	1.28806	5.93087	0.0148779	0.32253	NA	NA	NA	NA	NA	NA
Wdr52_WDR52_Quigley201207_XENLA_00117867	-0.246159	3.42582	5.92728	0.0149082	0.322806	NA	NA	NA	NA	NA	NA
NA_SKOR1_XeXenL6RMv10004023m	-0.351141	1.05751	5.92395	0.0149365	0.32302	NA_SKOR1_XeXenL6RMv10004023m	PTHR10005	SKI ONCOGENE-RELATED	GO SLIM	GO:0003676	nucleic acid binding
Ung_NM_001091943.1	0.225989	5.40204	5.92065	0.0149644	0.32302	Ung_NM_001091943.1	PTHR11264	URACIL-DNA GLYCOSYLASE	GO SLIM	GO:0016787	hydrolase activity
NA_DLK2_TeperekTkacz201206_XENLA_00059625	0.28666	2.21774	5.91988	0.014971	0.32302	NA	NA	NA	NA	NA	NA
NA_NM_001086538.1	-0.340922	1.09943	5.91644	0.0150002	0.323272	NA_NM_001086538.1	PTHR19432	SUGAR TRANSPORTER	GO SLIM	GO:0022857	transmembrane transporter activity
NA_NA_XeXenL6RMv10027817m	0.271223	2.47638	5.90866	0.0150667	0.324322	NA	NA	NA	NA	NA	NA
Ppp1r3b_PPP1R3B_Kwon201107_XENLA_00073610	0.230436	4.60851	5.90253	0.0151191	0.32507	Ppp1r3b_PPP1R3B_Kwon201107_XENLA_00073610	PTHR12307	PROTEIN PHOSPHATASE 1 BINDING PROTEIN	GO SLIM	GO:0005515	protein binding
Plekho1_PLEKHO1_Taira201203_XENLA_stage_00123081	0.236542	4.10775	5.89523	0.015182	0.325988	NA	NA	NA	NA	NA	NA
NA_ESRP1_XeXenL6RMv10019860m	0.227651	5.14558	5.89167	0.0152126	0.325988	NA_ESRP1_XeXenL6RMv10019860m	PTHR13976:SF2	HETEROGENEOUS NUCLEAR RIBONUCLEOPROTEIN-RELATED	GO SLIM	GO:0003735	structural constituent of ribosome
NA_PCGF2_Taira201203_XENLA_tissue_00224146	-0.281796	2.18672	5.89095	0.0152189	0.325988	NA_PCGF2_Taira201203_XENLA_tissue_00224146	PTHR10825	RING FINGER PROTEIN	GO SLIM	GO:0003676	nucleic acid binding
NA_EPS8L3_Taira201203_XENLA_tissue_00033642	-0.29221	1.89451	5.88747	0.015249	0.325988	NA_EPS8L3_Taira201203_XENLA_tissue_00033642	PTHR12287	EPIDERMAL GROWTH FACTOR RECEPTOR KINASE SUBSTRATE EPS8-RELATED PROTEIN	GO SLIM	GO:0007242	intracellular signaling cascade
Slc30a8_NM_001095453.1	0.223033	6.3856	5.88636	0.0152586	0.325988	Slc30a8_NM_001095453.1	PTHR11562	CATION EFFLUX PROTEIN/ ZINC TRANSPORTER	GO SLIM	GO:0022857	transmembrane transporter activity
NA_WDR90_XeXenL6RMv10030563m	-0.288351	1.90416	5.88487	0.0152716	0.325988	NA	NA	NA	NA	NA	NA
Efcab4a_EFCAB4A_Kwon201107_XENLA_00012565	-0.28815	1.9665	5.88318	0.0152862	0.325988	NA	NA	NA	NA	NA	NA
NA_TRIM33_Quigley201207_XENLA_00031263	-0.332599	1.04489	5.87489	0.0153584	0.326411	NA	NA	NA	NA	NA	NA
Mmel1_MMEL1_XeXenL6RMv10018155m	0.297263	1.85003	5.87312	0.0153738	0.326411	Mmel1_MMEL1_XeXenL6RMv10018155m	PTHR11733	ZINC METALLOPROTEASE FAMILY M13 NEPRILYSIN-RELATED	GO SLIM	GO:0016787	hydrolase activity
Bcar3_BCAR3_Ismailoglu201203_XENLA_00023261	-0.223818	5.16668	5.86938	0.0154065	0.326411	Bcar3_BCAR3_Ismailoglu201203_XENLA_00023261	PTHR14247:SF5	BCAR3	GO SLIM	GO:0007154	cell communication
NA_NAP1L4_Taira201203_XENLA_tissue_00036608	0.235788	4.15177	5.8692	0.0154081	0.326411	NA_NAP1L4_Taira201203_XENLA_tissue_00036608	PTHR11875:SF7	NUCLEOSOME ASSEMBLY PROTEIN	GO SLIM	GO:0019208	phosphatase regulator activity
NA_SESN3_TC418185	-0.284731	2.01337	5.86675	0.0154295	0.326411	NA_SESN3_TC418185	PTHR12474	P53 REGULATED PA26 NUCLEAR PROTEIN SESTRIN	GO SLIM	GO:0004601	peroxidase activity
Tspan1_TSPAN1_Taira201203_XENLA_stage_00032067	0.223936	5.39141	5.86599	0.0154362	0.326411	Tspan1_TSPAN1_Taira201203_XENLA_stage_00032067	PTHR19282:SF68	TETRASPANIN 1	GO SLIM	GO:0005515	protein binding
NA_NP_001090744.2_TeperekTkacz201206_XENLA_00124174	-0.273222	2.36956	5.86525	0.0154426	0.326411	NA_NP_001090744.2_TeperekTkacz201206_XENLA_00124174	PTHR14226	NEUROPATHY TARGET ESTERASE/SWISS CHEESE(D.MELANOGASTER)	GO SLIM	GO:0016787	hydrolase activity
NA_CDCA5_Kwon201107_XENLA_00034236	0.223636	5.28008	5.86459	0.0154484	0.326411	NA_CDCA5_Kwon201107_XENLA_00034236	PTHR12981	ZINC FINGER PROTEIN-LIKE 1	GO SLIM	GO:0003676	nucleic acid binding
NA_NM_001092633.1	-0.288432	1.94238	5.85226	0.0155571	0.328328	NA	NA	NA	NA	NA	NA
NA_IRF6.2_Kwon201107_XENLA_00136260	-0.235058	4.12102	5.84517	0.0156198	0.329273	NA_IRF6.2_Kwon201107_XENLA_00136260	PTHR11949	INTERFERON REGULATORY FACTOR	GO SLIM	GO:0003676	nucleic acid binding
NA_SNRPE_TC426432	0.22235	6.03826	5.84061	0.0156604	0.329749	NA_SNRPE_TC426432	PTHR11193	SMALL NUCLEAR RIBONUCLEOPROTEIN E	GO SLIM	GO:0031202	RNA splicing factor activity, transesterification mechanism
Plag1_PLAG1_XeXenL6RMv10046092m	-0.301314	1.67601	5.83532	0.0157075	0.330045	Plag1_PLAG1_XeXenL6RMv10046092m	PTHR10032	ZINC FINGER PROTEIN WITH KRAB AND SCAN DOMAINS	GO SLIM	GO:0003676	nucleic acid binding
Tlk1_TLK1_Kwon201107_XENLA_00058017	-0.221248	5.57701	5.835	0.0157104	0.330045	Tlk1_TLK1_Kwon201107_XENLA_00058017	PTHR22974	MIXED LINEAGE PROTEIN KINASE	GO SLIM	GO:0016740	transferase activity
Tgs1_NM_001092224.1	-0.217803	6.3815	5.83236	0.015734	0.330163	Tgs1_NM_001092224.1	PTHR14741:SF10	PRIP INTERACTING PROTEIN. PIMT	GO SLIM	GO:0008168	methyltransferase activity
Oaf_OAF_Taira201203_XENLA_tissue_00015982	-0.262921	2.66061	5.82419	0.0158073	0.330756	Oaf_OAF_Taira201203_XENLA_tissue_00015982	PTHR13423	OUT AT FIRST	GO SLIM	GO:0007398	ectoderm development
NA_NA_TeperekTkacz201206_XENLA_00011833	-0.229885	4.47055	5.82388	0.01581	0.330756	NA	NA	NA	NA	NA	NA
NA_TRAPPC12_XeXenL6RMv10005471m	-0.28391	1.99185	5.82317	0.0158164	0.330756	NA_TRAPPC12_XeXenL6RMv10005471m	PTHR21581	D-ALANYL-D-ALANINE CARBOXYPEPTIDASE	GO SLIM	GO:0016787	hydrolase activity
NA_NA_Taira201203_XENLA_stage_00197069	0.220785	6.31138	5.81597	0.0158813	0.331734	NA	NA	NA	NA	NA	NA
1700037H04Rik_C20ORF27_XeXenL6RMv10041960m	-0.232664	4.18749	5.81002	0.0159351	0.331993	NA	NA	NA	NA	NA	NA
NA_SLC30A8_Quigley201207_XENLA_00057767	0.22578	5.57482	5.80863	0.0159477	0.331993	NA_SLC30A8_Quigley201207_XENLA_00057767	PTHR11562	CATION EFFLUX PROTEIN/ ZINC TRANSPORTER	GO SLIM	GO:0022857	transmembrane transporter activity
Thada_NA_Kwon201107_XENLA_00018814	-0.221548	5.39229	5.8086	0.015948	0.331993	Thada_NA_Kwon201107_XENLA_00018814	PTHR14387	THADA/DEATH RECEPTOR INTERACTING PROTEIN	GO SLIM	GO:0004872	receptor activity
NA_GBY_Taira201203_XENLA_stage_00206696	0.283744	2.16021	5.79828	0.0160419	0.333126	NA_GBY_Taira201203_XENLA_stage_00206696	PTHR11442:SF6	CYTOGLOBIN (HISTOGLOBIN)	GO SLIM	GO:0008015	blood circulation
NA_CDR2L_Ismailoglu201203_XENLA_00036285	-0.263748	2.52314	5.79785	0.0160458	0.333126	NA	NA	NA	NA	NA	NA
Jmjd8_JMJD8_Kwon201107_XENLA_00008424	-0.334967	0.9008	5.79637	0.0160593	0.333126	Jmjd8_JMJD8_Kwon201107_XENLA_00008424	PTHR12480	PHOSPHATIDYLSERINE RECEPTOR	GO SLIM	GO:0004872	receptor activity
NA_UBR2_XeXenL6RMv10010071m	-0.33555	0.912276	5.79465	0.0160751	0.333126	NA_UBR2_XeXenL6RMv10010071m	PTHR21497	UBIQUITIN LIGASE E3 ALPHA-RELATED	GO SLIM	GO:0016874	ligase activity
Kntc1_KNTC1_XeXenL6RMv10029691m	0.316456	1.16254	5.78968	0.0161205	0.333691	NA	NA	NA	NA	NA	NA
NA_PTPN14_Kwon201107_XENLA_00101059	0.235666	4.4462	5.78713	0.0161439	0.333798	NA_PTPN14_Kwon201107_XENLA_00101059	PTHR19134:SF77	PROTEIN TYROSINE PHOSPHATASE, NON-RECEPTOR TYPE 14	GO SLIM	GO:0016787	hydrolase activity
NA_HDAC2_XeXenL6RMv10043482m	0.278644	2.42206	5.78108	0.0161996	0.334573	NA_HDAC2_XeXenL6RMv10043482m	PTHR10625	HISTONE DEACETYLASE	GO SLIM	GO:0016787	hydrolase activity
NA_FAM189A1_Kwon201107_XENLA_00016217	-0.244323	3.37541	5.77898	0.0162189	0.334588	NA	NA	NA	NA	NA	NA
NA_NA_Ismailoglu201203_XENLA_00063576	0.230428	4.28388	5.77589	0.0162475	0.334588	NA_NA_Ismailoglu201203_XENLA_00063576	PTHR12547	CCCH ZINC FINGER/TIS11-RELATED	GO SLIM	GO:0003676	nucleic acid binding
NA_TACC3_XeXenL6RMv10019573m	0.23727	3.7685	5.77342	0.0162703	0.334588	NA	NA	NA	NA	NA	NA
Numbl_NUMBL_Taira201203_XENLA_tissue_00269219	0.240975	3.68141	5.7731	0.0162733	0.334588	Numbl_NUMBL_Taira201203_XENLA_tissue_00269219	PTHR11232:SF20	SUBFAMILY NOT NAMED	GO SLIM	GO:0005515	protein binding
NA_XPO6_Taira201203_XENLA_stage_00158057	-0.214817	7.54505	5.7641	0.0163568	0.335615	NA	NA	NA	NA	NA	NA
Gprc5b_GPRC5B_TeperekTkacz201202_XENLA_00003773	0.231478	4.26513	5.76253	0.0163715	0.335615	Gprc5b_GPRC5B_TeperekTkacz201202_XENLA_00003773	PTHR14511	RETINOIC ACID INDUCED G PROTEIN COUPLED RECEPTOR	GO SLIM	GO:0004872	receptor activity
Hmmr_NM_001094467.1	-0.215457	6.86488	5.76181	0.0163782	0.335615	NA	NA	NA	NA	NA	NA
AW554918_KIAA1328_TeperekTkacz201202_XENLA_00080823	-0.257236	2.7844	5.75564	0.0164358	0.336074	NA	NA	NA	NA	NA	NA
NA_CHST7_Taira201203_XENLA_stage_00123875	-0.223904	5.31808	5.75549	0.0164372	0.336074	NA_CHST7_Taira201203_XENLA_stage_00123875	PTHR10704	CARBOHYDRATE SULFOTRANSFERASE	GO SLIM	GO:0016740	transferase activity
Dyrk2_DYRK2_TeperekTkacz201202_XENLA_00003361	0.237034	3.67213	5.74114	0.016572	0.338453	Dyrk2_DYRK2_TeperekTkacz201202_XENLA_00003361	PTHR24058	DUAL SPECIFICITY PROTEIN KINASE	GO SLIM	GO:0016740	transferase activity
NA_SART1_XeXenL6RMv10028701m	-0.331256	1.21091	5.73475	0.0166324	0.339161	NA_SART1_XeXenL6RMv10028701m	PTHR14152	SQUAMOUS CELL CARCINOMA ANTIGEN RECOGNISED BY CYTOTOXIC T LYMPHOCYTES	GO SLIM	GO:0007155	cell adhesion
NA_TM9SF3_XeXenL6RMv10013557m	0.223288	4.8466	5.73217	0.0166569	0.339161	NA_TM9SF3_XeXenL6RMv10013557m	PTHR10766	TRANSMEMBRANE 9 SUPERFAMILY PROTEIN	GO SLIM	GO:0022857	transmembrane transporter activity
Trmt13_NM_001091875.1	-0.237601	3.77428	5.73118	0.0166663	0.339161	NA	NA	NA	NA	NA	NA
Mknk1_MKNK1_Taira201203_XENLA_stage_00034891	0.246361	3.15982	5.72966	0.0166807	0.339161	NA	NA	NA	NA	NA	NA
NA_COX5B.2_TeperekTkacz201202_XENLA_00087620	0.263007	3.00045	5.72691	0.0167069	0.339246	NA_COX5B.2_TeperekTkacz201202_XENLA_00087620	PTHR10122	CYTOCHROME C OXIDASE SUBUNIT 5B, MITOCHONDRIAL	GO SLIM	GO:0016491	oxidoreductase activity
NA_NM_001093406.1	-0.235902	3.69894	5.72533	0.0167219	0.339246	NA	NA	NA	NA	NA	NA
NA_EPAS1_Taira201203_XENLA_tissue_00009422	0.242892	3.46551	5.71981	0.0167746	0.33994	NA_EPAS1_Taira201203_XENLA_tissue_00009422	PTHR23043:SF8	HYPOXIA-INDUCIBLE FACTOR 2 ALPHA, HIF-2 ALPHA	GO SLIM	GO:0003676	nucleic acid binding
Slc9a3_SLC9A3_Taira201203_XENLA_stage_00032015	0.224074	5.65401	5.71101	0.0168588	0.340962	Slc9a3_SLC9A3_Taira201203_XENLA_stage_00032015	PTHR10110	SODIUM/HYDROGEN EXCHANGER	GO SLIM	GO:0022857	transmembrane transporter activity
NA_ZFP36L2.1_TC424145	-0.237661	3.62498	5.71066	0.0168622	0.340962	NA_ZFP36L2.1_TC424145	PTHR12547	CCCH ZINC FINGER/TIS11-RELATED	GO SLIM	GO:0003676	nucleic acid binding
NA_ARHGAP17_TeperekTkacz201206_XENLA_00110647	0.242697	3.3512	5.70616	0.0169055	0.341462	NA_ARHGAP17_TeperekTkacz201206_XENLA_00110647	PTHR14130:SF3	NADRIN RHO-GAP	GO SLIM	GO:0005083	small GTPase regulator activity
Clns1a_CLNS1A_Taira201203_XENLA_tissue_00187445	0.245857	3.83665	5.70144	0.016951	0.342004	Clns1a_CLNS1A_Taira201203_XENLA_tissue_00187445	PTHR21399	CHLORIDE CONDUCTANCE REGULATORY PROTEIN ICLN	GO SLIM	GO:0022857	transmembrane transporter activity
NA_NM_001096250.1	-0.220657	5.19174	5.6983	0.0169814	0.342152	NA_NM_001096250.1	PTHR10953	UBIQUITIN-ACTIVATING ENZYME E1	GO SLIM	GO:0016874	ligase activity
NA_CSE1L_XeXenL6RMv10045061m	0.233498	4.57228	5.69592	0.0170044	0.342152	NA_CSE1L_XeXenL6RMv10045061m	PTHR10997	IMPORTIN-7, 8, 11	GO SLIM	GO:0016787	hydrolase activity
NA_BC129544.1	0.290341	2.04083	5.69489	0.0170143	0.342152	NA	NA	NA	NA	NA	NA
Nrsn1_NRSN1_Taira201203_XENLA_tissue_00124914	0.304575	2.10169	5.69203	0.0170421	0.342335	NA	NA	NA	NA	NA	NA
NA_NA_TeperekTkacz201202_XENLA_00134437	-0.340379	0.8479	5.68675	0.0170935	0.342757	NA	NA	NA	NA	NA	NA
Gm15800_C12ORF51_Kwon201107_XENLA_00027898	0.244354	3.22395	5.68603	0.0171005	0.342757	Gm15800_C12ORF51_Kwon201107_XENLA_00027898	PTHR11254	HECT DOMAIN UBIQUITIN-PROTEIN LIGASE	GO SLIM	GO:0016874	ligase activity
NA_NM_001094794.1	-0.278893	2.16239	5.67833	0.0171757	0.343646	NA_NM_001094794.1	PTHR11557	PORPHOBILINOGEN DEAMINASE	GO SLIM	GO:0016787	hydrolase activity
NA_NM_001095925.1	-0.221237	4.99611	5.67766	0.0171823	0.343646	NA_NM_001095925.1	PTHR19134:SF135	SUBFAMILY NOT NAMED	GO SLIM	GO:0016787	hydrolase activity
NA_BC085069.1	-0.24307	3.52803	5.6741	0.0172172	0.343969	NA	NA	NA	NA	NA	NA
NA_CRX_Taira201203_XENLA_tissue_00009715	0.213661	7.42386	5.67155	0.0172422	0.344067	NA	NA	NA	NA	NA	NA
Nudt17_NUDT17_TeperekTkacz201202_XENLA_00043730	0.277984	2.29798	5.66835	0.0172737	0.344067	Nudt17_NUDT17_TeperekTkacz201202_XENLA_00043730	PTHR22769	MUTT/NUDIX HYDROLASE	GO SLIM	GO:0016787	hydrolase activity
NA_MYOD1_Taira201203_XENLA_tissue_00232010	-0.238219	4.06846	5.66787	0.0172784	0.344067	NA_MYOD1_Taira201203_XENLA_tissue_00232010	PTHR11534:SF2	MYOGENIC DETERMINING FACTOR 1, MYOD1	GO SLIM	GO:0003676	nucleic acid binding
Map3k2_MAP3K2_Taira201203_XENLA_stage_00151904	0.294968	1.75881	5.66327	0.0173238	0.344596	Map3k2_MAP3K2_Taira201203_XENLA_stage_00151904	PTHR24360	MAPKK/MEKK	GO SLIM	GO:0016740	transferase activity
Prosapip1_PROSAPIP1_Ismailoglu201203_XENLA_00000746	-0.234972	3.72013	5.65967	0.0173594	0.344633	NA	NA	NA	NA	NA	NA
Osbpl2_OSBPL2_Taira201203_XENLA_tissue_00154226	-0.239761	3.43947	5.65929	0.0173632	0.344633	Osbpl2_OSBPL2_Taira201203_XENLA_tissue_00154226	PTHR10972	OXYSTEROL-BINDING PROTEIN-RELATED	GO SLIM	GO:0006629	lipid metabolic process
NA_CNTLN_XeXenL6RMv10012240m	-0.298697	1.53153	5.65421	0.0174135	0.345259	NA	NA	NA	NA	NA	NA
Lig3_LIG3_Taira201203_XENLA_stage_00126114	0.228287	4.39784	5.64485	0.0175067	0.346732	Lig3_LIG3_Taira201203_XENLA_stage_00126114	PTHR10459	DNA LIGASE	GO SLIM	GO:0016874	ligase activity
Trappc12_NM_001096239.1	-0.256825	2.66583	5.64018	0.0175534	0.347281	Trappc12_NM_001096239.1	PTHR21581	D-ALANYL-D-ALANINE CARBOXYPEPTIDASE	GO SLIM	GO:0016787	hydrolase activity
NA_NA_Park201106_XENLA_00071377	-0.220804	4.95013	5.63818	0.0175735	0.347303	NA	NA	NA	NA	NA	NA
Tpm1_AF013612.1	-0.219373	5.17289	5.63069	0.0176487	0.348106	NA	NA	NA	NA	NA	NA
Nek3_NM_001091706.1	0.288871	2.03684	5.63036	0.0176521	0.348106	NA	NA	NA	NA	NA	NA
NA_NA_Kwon201107_XENLA_00044731	0.289551	1.64015	5.62781	0.0176777	0.348152	NA_NA_Kwon201107_XENLA_00044731	PTHR11830	40S RIBOSOMAL PROTEIN S3A	GO SLIM	GO:0003735	structural constituent of ribosome
NA_NM_001127849.1	0.248717	3.12257	5.62636	0.0176924	0.348152	NA	NA	NA	NA	NA	NA
NA_TRIL_Taira201203_XENLA_stage_00129591	0.224476	4.92911	5.62088	0.0177477	0.348771	NA_TRIL_Taira201203_XENLA_stage_00129591	PTHR24367	LEUCINE-RICH REPEAT-CONTAINING PROTEIN	GO SLIM	GO:0004872	receptor activity
NA_BC170076.1	-0.226327	4.30179	5.61949	0.0177618	0.348771	NA	NA	NA	NA	NA	NA
NA_RNF121_XeXenL6RMv10040054m	-0.240606	3.39018	5.61247	0.0178331	0.349579	NA_RNF121_XeXenL6RMv10040054m	PTHR13407	RNF121 PROTEIN	GO SLIM	GO:0016874	ligase activity
Ccdc67_CCDC67_Quigley201112_XENLA_00028146	-0.255006	2.90433	5.61139	0.0178441	0.349579	Ccdc67_CCDC67_Quigley201112_XENLA_00028146	PTHR18875	SARCOMA ANTIGEN NY-SAR-24/CYTOSKELETAL PROTEIN SOJO	GO SLIM	GO:0005200	structural constituent of cytoskeleton
NA_SLC25A28_XeXenL6RMv10013784m	0.232104	3.8196	5.60803	0.0178783	0.349579	NA_SLC25A28_XeXenL6RMv10013784m	PTHR24089:SF77	SUBFAMILY NOT NAMED	GO SLIM	GO:0006810	transport
NA_TMPO_Taira201203_XENLA_stage_00210876	0.212972	7.67083	5.60794	0.0178792	0.349579	NA_TMPO_Taira201203_XENLA_stage_00210876	PTHR12019	LAMINA-ASSOCIATED POLYPEPTIDE (THYMOPOIETIN)	GO SLIM	GO:0005515	protein binding
NA_NM_001089707.1	0.276587	2.15953	5.60552	0.017904	0.34969	NA_NM_001089707.1	PTHR21258:SF20	FIBROBLAST GROWTH FACTOR RECEPTOR SUBSTRATE 2, 3	GO SLIM	GO:0007166	cell surface receptor linked signal transduction
NA_BC130110.1	-0.215558	6.12041	5.60137	0.0179465	0.350014	NA_BC130110.1	PTHR10985	BASIC HELIX-LOOP-HELIX TRANSCRIPTION FACTOR, HES-RELATED	GO SLIM	GO:0003676	nucleic acid binding
NA_MPZL2_Kwon201107_XENLA_00038788	0.226909	4.26885	5.59986	0.017962	0.350014	NA_MPZL2_Kwon201107_XENLA_00038788	PTHR13869:SF12	MYELIN PROTEIN ZERO-LIKE PROTEIN 2	GO SLIM	GO:0007155	cell adhesion
Tmem69_TMEM69_Ismailoglu201203_XENLA_00048527	0.274541	2.0636	5.59547	0.018007	0.350014	NA	NA	NA	NA	NA	NA
NA_F7ALI0_XENTR_Kwon201107_XENLA_00015519	0.221871	4.98776	5.59475	0.0180144	0.350014	NA_F7ALI0_XENTR_Kwon201107_XENLA_00015519	PTHR24365	TOLL-LIKE RECEPTOR	GO SLIM	GO:0004872	receptor activity
NA_NM_001088781.1	-0.225031	4.40268	5.59367	0.0180255	0.350014	NA_NM_001088781.1	PTHR11697:SF5	GENERAL TRANSCRIPTION FACTOR II-I REPEAT DOMAIN-CONTAINING PROTEIN 1	GO SLIM	GO:0003676	nucleic acid binding
NA_USP5_XeXenL6RMv10016357m	0.327999	1.23773	5.59274	0.0180351	0.350014	NA_USP5_XeXenL6RMv10016357m	PTHR24006:SF36	SUBFAMILY NOT NAMED	GO SLIM	GO:0016787	hydrolase activity
NA_PTK2_XeXenL6RMv10049077m	-0.223718	4.49032	5.585	0.0181149	0.351192	NA_PTK2_XeXenL6RMv10049077m	PTHR24418	TYROSINE-PROTEIN KINASE	GO SLIM	GO:0016740	transferase activity
NA_BC077452.1	0.21543	5.87005	5.57854	0.0181819	0.351914	NA_BC077452.1	PTHR22826:SF7	GUANINE NUCLEOTIDE EXCHANGE FACTOR-RELATED	GO SLIM	GO:0005083	small GTPase regulator activity
NA_RERE_Audic201207_XENLA_00002808	0.220688	5.04103	5.57741	0.0181936	0.351914	NA_RERE_Audic201207_XENLA_00002808	PTHR13859	ATROPHIN-RELATED	GO SLIM	GO:0006928	cell motility
NA_TGS1_Quigley201112_XENLA_00070088	-0.27353	1.98297	5.57586	0.0182097	0.351914	NA_TGS1_Quigley201112_XENLA_00070088	PTHR14741:SF10	PRIP INTERACTING PROTEIN. PIMT	GO SLIM	GO:0008168	methyltransferase activity
NA_PKDCC.1_Taira201203_XENLA_stage_00008166	0.220634	5.06989	5.56992	0.0182715	0.352587	NA_PKDCC.1_Taira201203_XENLA_stage_00008166	PTHR23257:SF101	SUBFAMILY NOT NAMED	GO SLIM	GO:0016740	transferase activity
Asph_ASPH_Park201106_XENLA_00028887	-0.21653	5.47328	5.56723	0.0182997	0.352587	Asph_ASPH_Park201106_XENLA_00028887	PTHR12366:SF2	ASPARTYL/ASPARAGINYL BETA-HYDROXYLASE	GO SLIM	GO:0016491	oxidoreductase activity
Fam82a1_FAM82A1_Ismailoglu201203_XENLA_00007114	-0.227616	4.07191	5.5646	0.0183272	0.352587	NA	NA	NA	NA	NA	NA
Dhrs7b_DHRS7B_Park201106_XENLA_00095712	-0.275279	2.28508	5.56422	0.0183311	0.352587	Dhrs7b_DHRS7B_Park201106_XENLA_00095712	PTHR24322:SF44	SUBFAMILY NOT NAMED	GO SLIM	GO:0016491	oxidoreductase activity
NA_RAB39_Taira201203_XENLA_stage_00034644	0.237729	3.65786	5.56331	0.0183407	0.352587	NA_RAB39_Taira201203_XENLA_stage_00034644	PTHR24073	FAMILY NOT NAMED	GO SLIM	GO:0003924	GTPase activity
Kcnk6_NM_001096874.1	0.221746	4.78754	5.55738	0.018403	0.353414	Kcnk6_NM_001096874.1	PTHR11003:SF27	POTASSIUM CHANNEL SUBFAMILY K MEMBER 1 (INWARD RECTIFYING POTASSIUM CHANNEL PROTEIN TWIK-1)	GO SLIM	GO:0005261	cation channel activity
NA_RSRC2_Taira201203_XENLA_stage_00218280	0.279931	2.13169	5.54945	0.0184864	0.354071	NA	NA	NA	NA	NA	NA
NA_NA_TeperekTkacz201206_XENLA_00039159	-0.231371	3.97698	5.54922	0.018489	0.354071	NA_NA_TeperekTkacz201206_XENLA_00039159	PTHR10361	SODIUM-BILE ACID COTRANSPORTER	GO SLIM	GO:0022857	transmembrane transporter activity
NA_NM_001095871.1	0.232295	3.7513	5.54864	0.0184951	0.354071	NA_NM_001095871.1	PTHR23223	KRUEPPEL C2H2-TYPE ZINC-FINGER	GO SLIM	GO:0003676	nucleic acid binding
NA_ULK1_Ismailoglu201203_XENLA_00016756	0.227855	4.63564	5.54677	0.0185149	0.35408	NA	NA	NA	NA	NA	NA
NA_NAALAD2_Taira201203_XENLA_stage_00046481	0.265327	2.5241	5.54471	0.0185366	0.354126	NA_NAALAD2_Taira201203_XENLA_stage_00046481	PTHR10404	N-ACETYLATED-ALPHA-LINKED ACIDIC DIPEPTIDASE	GO SLIM	GO:0016787	hydrolase activity
Glt28d2_NM_001091408.1	-0.262803	2.45725	5.54066	0.0185796	0.354514	Glt28d2_NM_001091408.1	PTHR12867	GLYCOSYL TRANSFERASE-RELATED	GO SLIM	GO:0005975	carbohydrate metabolic process
NA_ZCCHC11_Taira201203_XENLA_stage_00174413	-0.235939	3.43078	5.53916	0.0185956	0.354514	NA_ZCCHC11_Taira201203_XENLA_stage_00174413	PTHR12271	POLY(A) POLYMERASE CID (PAP)-RELATED	GO SLIM	GO:0016740	transferase activity
Zbtb40_ZBTB40_Taira201203_XENLA_tissue_00103804	0.243127	3.20547	5.53536	0.018636	0.354844	Zbtb40_ZBTB40_Taira201203_XENLA_tissue_00103804	PTHR24394	FAMILY NOT NAMED	GO SLIM	GO:0003676	nucleic acid binding
NA_NM_001096719.1	0.23472	3.7127	5.53389	0.0186516	0.354844	NA	NA	NA	NA	NA	NA
NA_CRABP2_TeperekTkacz201206_XENLA_00064863	0.21625	6.42954	5.52688	0.0187265	0.355901	NA_CRABP2_TeperekTkacz201206_XENLA_00064863	PTHR11955	FATTY ACID BINDING PROTEIN	GO SLIM	GO:0008289	lipid binding
NA_CAPN13_Taira201203_XENLA_stage_00116462	0.283104	2.31811	5.52384	0.018759	0.35615	NA_CAPN13_Taira201203_XENLA_stage_00116462	PTHR10183	CALPAIN	GO SLIM	GO:0008234	cysteine-type peptidase activity
NA_WEE1_Ismailoglu201203_XENLA_00074025	0.210825	7.03957	5.51691	0.0188335	0.357193	NA_WEE1_Ismailoglu201203_XENLA_00074025	PTHR11042	EUKARYOTIC TRANSLATION INITIATION FACTOR 2-ALPHA KINASE (EIF2-ALPHA KINASE)-RELATED	GO SLIM	GO:0016740	transferase activity
Spryd4_NM_001098712.1	0.253878	2.69846	5.51247	0.0188814	0.357732	Spryd4_NM_001098712.1	PTHR25462:SF55	SUBFAMILY NOT NAMED	GO SLIM	GO:0007498	mesoderm development
Tcp1_TCP1_TC419113	0.214339	5.76507	5.50674	0.0189434	0.358536	Tcp1_TCP1_TC419113	PTHR11353	CHAPERONIN	GO SLIM	GO:0019538	protein metabolic process
NA_C16ORF48_Quigley201112_XENLA_00038706	-0.253107	2.64825	5.50185	0.0189963	0.359168	NA	NA	NA	NA	NA	NA
NA_GPX1_Taira201203_XENLA_tissue_00160287	0.229356	4.2071	5.49744	0.0190444	0.359705	NA_GPX1_Taira201203_XENLA_tissue_00160287	PTHR11592	GLUTATHIONE PEROXIDASE	GO SLIM	GO:0004601	peroxidase activity
NA_X14806.1	0.220129	5.70191	5.49513	0.0190695	0.35981	NA_X14806.1	PTHR11514	MYC	GO SLIM	GO:0003676	nucleic acid binding
NA_PNP_XeXenL6RMv10028362m	0.224157	4.67615	5.48742	0.0191538	0.360483	NA_PNP_XeXenL6RMv10028362m	PTHR11904	METHYLTHIOADENOSINE/PURINE NUCLEOSIDE PHOSPHORYLASE	GO SLIM	GO:0016740	transferase activity
NA_D10259.1	0.226541	4.35579	5.48714	0.0191568	0.360483	NA_D10259.1	PTHR24327	FAMILY NOT NAMED	GO SLIM	GO:0003676	nucleic acid binding
Ppp1r14a_PPP1R14A_Audic201207_XENLA_00005196	-0.223645	4.4055	5.48647	0.0191642	0.360483	Ppp1r14a_PPP1R14A_Audic201207_XENLA_00005196	PTHR16188	PROTEIN PHOSPHATASE 1 INHIBITOR POTENTIATED BY PROTEIN KINASE C	GO SLIM	GO:0019208	phosphatase regulator activity
Kit_KIT_Ismailoglu201203_XENLA_00017239	-0.249756	2.74582	5.48438	0.0191871	0.360544	Kit_KIT_Ismailoglu201203_XENLA_00017239	PTHR24416	TYROSINE-PROTEIN KINASE RECEPTOR	GO SLIM	GO:0016740	transferase activity
NA_ADMP_Taira201203_XENLA_stage_00069727	0.214127	5.89603	5.47773	0.0192603	0.361211	NA_ADMP_Taira201203_XENLA_stage_00069727	PTHR11848	TGF-BETA FAMILY	GO SLIM	GO:0005515	protein binding
Foxj1_FOXJ1_Chung201110_XENLA_00073874	0.227904	4.06111	5.47757	0.019262	0.361211	Foxj1_FOXJ1_Chung201110_XENLA_00073874	PTHR11829	FAMILY NOT NAMED	GO SLIM	GO:0003676	nucleic acid binding
NA_NM_001127839.1	-0.216884	5.39818	5.47533	0.0192868	0.361307	NA_NM_001127839.1	PTHR11461	SERINE PROTEASE INHIBITOR, SERPIN	GO SLIM	GO:0004867	serine-type endopeptidase inhibitor activity
NA_KLF10_Ismailoglu201203_XENLA_00025474	0.226125	4.03734	5.46277	0.0194258	0.363336	NA_KLF10_Ismailoglu201203_XENLA_00025474	PTHR23223	KRUEPPEL C2H2-TYPE ZINC-FINGER	GO SLIM	GO:0003676	nucleic acid binding
NA_AJ251846.1	0.20977	7.13229	5.46102	0.0194453	0.363336	NA	NA	NA	NA	NA	NA
NA_C2CD2_Chung201110_XENLA_00003809	-0.231786	3.54751	5.46019	0.0194545	0.363336	NA	NA	NA	NA	NA	NA
NA_NP_001120415.1_Taira201203_XENLA_tissue_00098106	0.26568	2.22382	5.45683	0.019492	0.363356	NA	NA	NA	NA	NA	NA
NA_NA_Kwon201107_XENLA_00052923	0.213975	5.63823	5.45465	0.0195163	0.363356	NA_NA_Kwon201107_XENLA_00052923	PTHR22811:SF6	TRANSMEMBRANE PROTEIN TMP21-RELATED	GO SLIM	GO:0006886	intracellular protein transport
NA_EEF1A1_TC426032	0.206923	10.994	5.4535	0.0195292	0.363356	NA_EEF1A1_TC426032	PTHR23115	TRANSLATION FACTOR	GO SLIM	GO:0019538	protein metabolic process
Atg4b_ATG4B_Taira201203_XENLA_tissue_00268259	-0.234869	3.40657	5.45299	0.0195348	0.363356	Atg4b_ATG4B_Taira201203_XENLA_tissue_00268259	PTHR22624:SF18	AUTOPHAGIN-2	GO SLIM	GO:0016787	hydrolase activity
Nup133_NUP133_Kwon201107_XENLA_00094766	0.218731	4.81104	5.45111	0.0195559	0.36338	NA	NA	NA	NA	NA	NA
Usp54_USP54_Kwon201107_XENLA_00118132	0.216765	5.10949	5.44626	0.0196103	0.363508	Usp54_USP54_Kwon201107_XENLA_00118132	PTHR22975	UBIQUITIN SPECIFIC PROTEINASE	GO SLIM	GO:0016874	ligase activity
NA_NM_001173404.1	-0.208844	7.79341	5.4462	0.0196109	0.363508	NA_NM_001173404.1	PTHR10270	SOX TRANSCRIPTION FACTOR	GO SLIM	GO:0003676	nucleic acid binding
Gtpbp1_NM_001094844.1	-0.213908	5.43093	5.44519	0.0196223	0.363508	Gtpbp1_NM_001094844.1	PTHR23115	TRANSLATION FACTOR	GO SLIM	GO:0019538	protein metabolic process
NA_C1QTNF4_Taira201203_XENLA_tissue_00265712	-0.314089	1.36383	5.44264	0.0196509	0.363671	NA	NA	NA	NA	NA	NA
NA_PYCRL_Taira201203_XENLA_tissue_00010226	0.307305	1.35179	5.43635	0.0197219	0.364225	NA_PYCRL_Taira201203_XENLA_tissue_00010226	PTHR11645	PYRROLINE-5-CARBOXYLATE REDUCTASE	GO SLIM	GO:0016491	oxidoreductase activity
Sema3a_SEMA3A_Taira201203_XENLA_stage_00218417	0.233246	3.51504	5.43319	0.0197576	0.364225	Sema3a_SEMA3A_Taira201203_XENLA_stage_00218417	PTHR11036	SEMAPHORIN	GO SLIM	GO:0005515	protein binding
NA_RAB39_Taira201203_XENLA_stage_00129194	0.236212	3.59327	5.43293	0.0197605	0.364225	NA_RAB39_Taira201203_XENLA_stage_00129194	PTHR24073	FAMILY NOT NAMED	GO SLIM	GO:0003924	GTPase activity
Rasd1_RASD1_TC436259	-0.213236	5.64211	5.4321	0.0197699	0.364225	NA	NA	NA	NA	NA	NA
Rab11fip2_RAB11FIP2_Taira201203_XENLA_tissue_00084901	-0.224914	4.10319	5.43007	0.0197928	0.364225	NA	NA	NA	NA	NA	NA
NA_RNF111_Taira201203_XENLA_tissue_00099998	0.213321	5.65118	5.42713	0.0198262	0.364225	NA_RNF111_Taira201203_XENLA_tissue_00099998	PTHR15683	SCAFFOLD ATTACHMENT FACTOR B-RELATED	GO SLIM	GO:0003676	nucleic acid binding
Tfeb_TFEB_Taira201203_XENLA_tissue_00146904	-0.331178	0.945785	5.42704	0.0198273	0.364225	Tfeb_TFEB_Taira201203_XENLA_tissue_00146904	PTHR10014	BASIC HELIX-LOOP-HELIX/LEUCINE ZIPPER TRANSCRIPTION FACTOR	GO SLIM	GO:0003676	nucleic acid binding
Tubd1_TUBD1_Taira201203_XENLA_stage_00179105	-0.236727	3.23225	5.42475	0.0198533	0.364225	Tubd1_TUBD1_Taira201203_XENLA_stage_00179105	PTHR11588:SF4	TUBULIN DELTA CHAIN	GO SLIM	GO:0005198	structural molecule activity
NA_BC161679.1	-0.261188	2.56862	5.42385	0.0198635	0.364225	NA	NA	NA	NA	NA	NA
Chka_CHKA_Park201106_XENLA_00025589	-0.282722	1.92458	5.42245	0.0198794	0.364225	Chka_CHKA_Park201106_XENLA_00025589	PTHR22603	CHOLINE/ETHANOALAMINE KINASE	GO SLIM	GO:0016740	transferase activity
Tspan15_TSPAN15_Kwon201107_XENLA_00028745	0.220939	4.67746	5.41807	0.0199294	0.364776	Tspan15_TSPAN15_Kwon201107_XENLA_00028745	PTHR19282:SF56	TRANSMEMBRANE 4 SUPERFAMILY MEMBER 15	GO SLIM	GO:0005515	protein binding
Ankrd13c_ANKRD13C_XeXenL6RMv10025119m	-0.215046	5.09924	5.41323	0.0199846	0.365422	NA	NA	NA	NA	NA	NA
Cpxm2_CPXM2_Ismailoglu201203_XENLA_00066963	-0.275572	1.91714	5.41049	0.0200161	0.365633	Cpxm2_CPXM2_Ismailoglu201203_XENLA_00066963	PTHR11532	PROTEASE M14 CARBOXYPEPTIDASE	GO SLIM	GO:0016787	hydrolase activity
NA_HERPUD1_Taira201203_XENLA_stage_00075451	0.232956	3.7537	5.40353	0.020096	0.366728	NA	NA	NA	NA	NA	NA
NA_FOXR1_Taira201203_XENLA_stage_00198570	0.272849	2.08029	5.40119	0.020123	0.366856	NA_FOXR1_Taira201203_XENLA_stage_00198570	PTHR11829	FAMILY NOT NAMED	GO SLIM	GO:0003676	nucleic acid binding
NA_PPP4R1L_Kwon201107_XENLA_00112704	-0.255427	2.50896	5.39737	0.0201671	0.366932	NA_PPP4R1L_Kwon201107_XENLA_00112704	PTHR10648	SERINE/THREONINE-PROTEIN PHOSPHATASE PP2A 65 KDA REGULATORY SUBUNIT	GO SLIM	GO:0016787	hydrolase activity
NA_BC089182.1	0.229259	4.13386	5.39697	0.0201717	0.366932	NA	NA	NA	NA	NA	NA
NA_AF382190.1	0.289549	1.51398	5.39563	0.0201873	0.366932	NA_AF382190.1	PTHR11801:SF5	SIGNAL TRANSDUCER AND ACTIVATOR OF TRANSCRIPTION 5	GO SLIM	GO:0003676	nucleic acid binding
NA_DGCR14_XeXenL6RMv10047932m	-0.31725	1.07791	5.39199	0.0202293	0.366993	NA_DGCR14_XeXenL6RMv10047932m	PTHR12940	ES-2 PROTEIN - RELATED	GO SLIM	GO:0016043	cellular component organization and biogenesis
NA_RPL7_Taira201203_XENLA_stage_00103966	0.212449	5.64203	5.39072	0.0202441	0.366993	NA_RPL7_Taira201203_XENLA_stage_00103966	PTHR11524	60S RIBOSOMAL PROTEIN L7	GO SLIM	GO:0003735	structural constituent of ribosome
NA_RACGAP1.2_Taira201203_XENLA_tissue_00059853	0.296419	1.59839	5.39016	0.0202507	0.366993	NA_RACGAP1.2_Taira201203_XENLA_tissue_00059853	PTHR23174	RAC GTPASE ACTIVATING PROTEIN	GO SLIM	GO:0007242	intracellular signaling cascade
NA_RNF111_Taira201203_XENLA_stage_00130624	0.218987	4.91851	5.38757	0.0202807	0.367174	NA_RNF111_Taira201203_XENLA_stage_00130624	PTHR15683	SCAFFOLD ATTACHMENT FACTOR B-RELATED	GO SLIM	GO:0003676	nucleic acid binding
Spag1_SPAG1_XeXenL6RMv10019864m	-0.228635	3.70528	5.38178	0.0203481	0.367319	NA	NA	NA	NA	NA	NA
Plekhn1_PLEKHN1_Ismailoglu201203_XENLA_00007733	0.208907	7.21236	5.38073	0.0203603	0.367319	Plekhn1_PLEKHN1_Ismailoglu201203_XENLA_00007733	PTHR22826:SF7	GUANINE NUCLEOTIDE EXCHANGE FACTOR-RELATED	GO SLIM	GO:0005083	small GTPase regulator activity
NA_RASD1_TeperekTkacz201202_XENLA_00020424	-0.214029	5.30469	5.37839	0.0203877	0.367319	NA	NA	NA	NA	NA	NA
Gfpt1_NM_001091267.1	0.205875	9.75882	5.37581	0.0204179	0.367319	Gfpt1_NM_001091267.1	PTHR10937	GLUCOSAMINE--FRUCTOSE-6-PHOSPHATE AMINOTRANSFERASE, ISOMERIZING	GO SLIM	GO:0008483	transaminase activity
NA_SUMF1_Taira201203_XENLA_tissue_00242972	-0.283068	1.85948	5.37564	0.0204199	0.367319	NA	NA	NA	NA	NA	NA
Tifa_BC082687.1	-0.300518	1.37809	5.37522	0.0204248	0.367319	NA	NA	NA	NA	NA	NA
NA_BC097904.1	-0.254368	2.45482	5.37487	0.0204289	0.367319	NA	NA	NA	NA	NA	NA
Wnt8b_NM_001088168.1	0.298185	1.69172	5.35928	0.0206122	0.369902	Wnt8b_NM_001088168.1	PTHR12027	WNT RELATED	GO SLIM	GO:0005515	protein binding
NA_NM_001096667.1	0.238642	3.14719	5.35873	0.0206188	0.369902	NA	NA	NA	NA	NA	NA
NA_NM_001096586.1	-0.258363	2.59367	5.35753	0.020633	0.369902	NA_NM_001096586.1	PTHR10642	RIBONUCLEASE H1	GO SLIM	GO:0003676	nucleic acid binding
NA_RNF123_Kwon201107_XENLA_00053414	0.243548	2.93826	5.35539	0.0206583	0.369958	NA_RNF123_Kwon201107_XENLA_00053414	PTHR13363	RING FINGER AND SRY DOMAIN-CONTAINING	GO SLIM	GO:0016874	ligase activity
NA_LIG3_Taira201203_XENLA_stage_00088759	0.220328	4.55856	5.35386	0.0206765	0.369958	NA_LIG3_Taira201203_XENLA_stage_00088759	PTHR10459	DNA LIGASE	GO SLIM	GO:0016874	ligase activity
Shroom3_SHROOM3_Taira201203_XENLA_tissue_00019340	0.248911	2.65922	5.34984	0.0207242	0.37045	Shroom3_SHROOM3_Taira201203_XENLA_tissue_00019340	PTHR15012:SF10	PDZ DOMAIN ACTIN BINDING PROTEIN SHROOM	GO SLIM	GO:0008092	cytoskeletal protein binding
Eif2c2_EIF2C2_TC457926	0.224072	4.05679	5.34645	0.0207645	0.370529	Eif2c2_EIF2C2_TC457926	PTHR22891	EUKARYOTIC TRANSLATION INITIATION FACTOR 2C	GO SLIM	GO:0045182	translation regulator activity
Hes7_ESR-5_Ismailoglu201203_XENLA_00047472	-0.227127	4.07045	5.3442	0.0207913	0.370529	Hes7_ESR-5_Ismailoglu201203_XENLA_00047472	PTHR10985	BASIC HELIX-LOOP-HELIX TRANSCRIPTION FACTOR, HES-RELATED	GO SLIM	GO:0003676	nucleic acid binding
NA_NA_Ismailoglu201203_XENLA_00063103	-0.224424	3.96937	5.34371	0.0207972	0.370529	NA_NA_Ismailoglu201203_XENLA_00063103	PTHR19959	KINESIN LIGHT CHAIN	GO SLIM	GO:0005200	structural constituent of cytoskeleton
Iqgap3_IQGAP3_Ismailoglu201203_XENLA_00035581	0.220989	4.31812	5.34268	0.0208094	0.370529	Iqgap3_IQGAP3_Ismailoglu201203_XENLA_00035581	PTHR14149	RAS GTPASE-ACTIVATING PROTEIN WITH IQ MOTIF	GO SLIM	GO:0005083	small GTPase regulator activity
Kcnq1_NM_001122875.1	0.21735	4.7595	5.33975	0.0208445	0.370793	NA	NA	NA	NA	NA	NA
Serpinf2_SERPINF2_Kwon201107_XENLA_00128975	-0.234843	3.24957	5.33643	0.0208842	0.371139	Serpinf2_SERPINF2_Kwon201107_XENLA_00128975	PTHR11461	SERINE PROTEASE INHIBITOR, SERPIN	GO SLIM	GO:0004867	serine-type endopeptidase inhibitor activity
NA_NA_Taira201203_XENLA_tissue_00175105	0.279857	1.75132	5.3318	0.0209398	0.371768	NA_NA_Taira201203_XENLA_tissue_00175105	PTHR24115	FAMILY NOT NAMED	GO SLIM	GO:0003777	microtubule motor activity
NA_MNT_Quigley201207_XENLA_00093339	-0.253369	2.59472	5.326	0.0210095	0.372645	NA	NA	NA	NA	NA	NA
P2ry1_P2RY1_Taira201203_XENLA_stage_00159174	0.322131	1.03875	5.31604	0.02113	0.374137	P2ry1_P2RY1_Taira201203_XENLA_stage_00159174	PTHR24231	PURINOCEPTOR-RELATED G-PROTEIN COUPLED RECEPTOR	GO SLIM	GO:0004872	receptor activity
Kpna2_NM_001086990.1	0.207996	6.61023	5.31497	0.0211429	0.374137	Kpna2_NM_001086990.1	PTHR23316	IMPORTIN ALPHA	GO SLIM	GO:0006605	protein targeting
Ehbp1_EHBP1_Taira201203_XENLA_tissue_00163266	-0.226453	3.76923	5.31299	0.021167	0.374137	NA	NA	NA	NA	NA	NA
NA_CBLB_Park201106_XENLA_00026143	0.249312	2.72652	5.31133	0.0211872	0.374137	NA_CBLB_Park201106_XENLA_00026143	PTHR23007	CBL	GO SLIM	GO:0016874	ligase activity
NA_FAU_Taira201203_XENLA_stage_00196012	0.221903	4.46841	5.30866	0.0212196	0.374137	NA	NA	NA	NA	NA	NA
Fancb_FANCB_Kwon201107_XENLA_00018922	-0.247655	2.69665	5.30775	0.0212307	0.374137	NA	NA	NA	NA	NA	NA
NA_GRK6_Kwon201107_XENLA_00069493	-0.227281	3.70754	5.30728	0.0212365	0.374137	NA_GRK6_Kwon201107_XENLA_00069493	PTHR24355	G PROTEIN-COUPLED RECEPTOR KINASE/RIBOSOMAL PROTEIN S6 KINASE	GO SLIM	GO:0016740	transferase activity
NA_CERS2_XeXenL6RMv10031719m	-0.230824	3.50942	5.30427	0.0212732	0.374425	NA_CERS2_XeXenL6RMv10031719m	PTHR12560	LONGEVITY ASSURANCE FACTOR 1 (LAG1)	GO SLIM	GO:0006629	lipid metabolic process
Anks3_ANKS3_TeperekTkacz201206_XENLA_00109365	-0.21212	5.26331	5.30006	0.0213246	0.374816	NA	NA	NA	NA	NA	NA
NA_ASPHD2_Taira201203_XENLA_tissue_00238136	-0.24922	2.57001	5.29911	0.0213363	0.374816	NA	NA	NA	NA	NA	NA
NA_AY183756.1	0.21048	5.91289	5.29074	0.0214391	0.375982	NA	NA	NA	NA	NA	NA
Rassf3_RASSF3_Kwon201107_XENLA_00059493	-0.215836	4.86427	5.29037	0.0214437	0.375982	Rassf3_RASSF3_Kwon201107_XENLA_00059493	PTHR22738	RASSF	GO SLIM	GO:0005083	small GTPase regulator activity
NA_GTF2H5_Taira201203_XENLA_stage_00208622	-0.245904	2.76599	5.27563	0.0216259	0.37863	NA	NA	NA	NA	NA	NA
NA_ZNF238.2_Ismailoglu201203_XENLA_00052515	0.225014	3.98457	5.27482	0.021636	0.37863	NA_ZNF238.2_Ismailoglu201203_XENLA_00052515	PTHR24408	FAMILY NOT NAMED	GO SLIM	GO:0003676	nucleic acid binding
Tnip2_TNIP2_Taira201203_XENLA_stage_00060134	-0.25132	2.57053	5.26881	0.0217108	0.37941	NA	NA	NA	NA	NA	NA
NA_PARP4_TeperekTkacz201202_XENLA_00026731	0.258375	3.03827	5.26597	0.0217463	0.37941	NA_PARP4_TeperekTkacz201202_XENLA_00026731	PTHR10338:SF7	POLY[ADP-RIBOSE] POLYMERASE 4, PARP-4	GO SLIM	GO:0004867	serine-type endopeptidase inhibitor activity
NA_C17ORF103_Taira201203_XENLA_stage_00169541	-0.253032	2.72649	5.26531	0.0217545	0.37941	NA	NA	NA	NA	NA	NA
NA_NM_001087240.1	-0.252569	2.48546	5.26461	0.0217633	0.37941	NA_NM_001087240.1	PTHR10918	HOMER	GO SLIM	GO:0005515	protein binding
Skida1_C10ORF140_Taira201203_XENLA_stage_00100761	0.247714	2.99053	5.25856	0.0218391	0.380108	NA	NA	NA	NA	NA	NA
NA_GBY_Horb201201_XENLA_00095676	0.264832	2.31192	5.25763	0.0218507	0.380108	NA_GBY_Horb201201_XENLA_00095676	PTHR11442:SF6	CYTOGLOBIN (HISTOGLOBIN)	GO SLIM	GO:0008015	blood circulation
Cope_COPE_XeXenL6RMv10036817m	0.221047	4.07241	5.25645	0.0218656	0.380108	Cope_COPE_XeXenL6RMv10036817m	PTHR10805	COATOMER SUBUNIT EPSILON	GO SLIM	GO:0006886	intracellular protein transport
NA_NM_001127833.1	-0.206786	7.03563	5.24828	0.0219685	0.381537	NA	NA	NA	NA	NA	NA
NA_ITGA3_Taira201203_XENLA_tissue_00041630	0.248325	2.9766	5.24029	0.0220696	0.382929	NA_ITGA3_Taira201203_XENLA_tissue_00041630	PTHR23220	INTEGRIN ALPHA	GO SLIM	GO:0007155	cell adhesion
Fbxl3_FBXL3_XeXenL6RMv10042476m	0.309465	1.03948	5.23586	0.0221259	0.383543	NA	NA	NA	NA	NA	NA
NA_FARSB_XeXenL6RMv10038612m	-0.278021	1.85399	5.22968	0.0222046	0.384545	NA_FARSB_XeXenL6RMv10038612m	PTHR10947	PHENYLALANYL-TRNA SYNTHETASE BETA CHAIN AND LEUCINE-RICH REPEAT-CONTAINING PROTEIN 47	GO SLIM	GO:0016874	ligase activity
Hhex_HHEX_TeperekTkacz201206_XENLA_00092531	0.212552	5.12287	5.22535	0.0222599	0.385139	Hhex_HHEX_TeperekTkacz201206_XENLA_00092531	PTHR24324	FAMILY NOT NAMED	GO SLIM	GO:0003676	nucleic acid binding
NA_ARHGEF1_Quigley201112_XENLA_00114919	-0.217711	4.59589	5.22351	0.0222835	0.385183	NA	NA	NA	NA	NA	NA
Pofut2_POFUT2_Taira201203_XENLA_tissue_00285619	0.221703	4.01913	5.22182	0.0223052	0.385196	Pofut2_POFUT2_Taira201203_XENLA_tissue_00285619	PTHR13398	GDP-FUCOSE PROTEIN O-FUCOSYLTRANSFERASE 2	GO SLIM	GO:0016740	transferase activity
NA_PIGC_Ismailoglu201203_XENLA_00040080	0.310468	1.23819	5.21721	0.0223644	0.385855	NA_PIGC_Ismailoglu201203_XENLA_00040080	PTHR12982	PHOSPHATIDYLINOSITOL GLYCAN, CLASS C	GO SLIM	GO:0016740	transferase activity
NA_ESR-5_Taira201203_XENLA_stage_00204299	-0.208518	5.93599	5.20586	0.0225108	0.388016	NA_ESR-5_Taira201203_XENLA_stage_00204299	PTHR10985	BASIC HELIX-LOOP-HELIX TRANSCRIPTION FACTOR, HES-RELATED	GO SLIM	GO:0003676	nucleic acid binding
Vash2_VASH2_Taira201203_XENLA_tissue_00027907	0.233473	3.68292	5.20217	0.0225587	0.388476	NA	NA	NA	NA	NA	NA
Dad1_DAD1_TC435518	0.249463	2.66783	5.19742	0.0226204	0.388754	Dad1_DAD1_TC435518	PTHR10705	DOLICHYL-DIPHOSPHOOLIGOSACCHARIDE--PROTEIN GLYCOSYLTRANSFERASE SUBUNIT DAD1	GO SLIM	GO:0016740	transferase activity
NA_SOX9_Kwon201107_XENLA_00126742	0.261409	2.32826	5.19675	0.0226291	0.388754	NA_SOX9_Kwon201107_XENLA_00126742	PTHR10270	SOX TRANSCRIPTION FACTOR	GO SLIM	GO:0003676	nucleic acid binding
Habp4_HABP4_Kwon201107_XENLA_00000573	0.215542	5.59241	5.19604	0.0226384	0.388754	Habp4_HABP4_Kwon201107_XENLA_00000573	PTHR12299:SF7	HYALURONIC ACID-BINDING PROTEIN 4	GO SLIM	GO:0003676	nucleic acid binding
NA_NA_Ismailoglu201203_XENLA_00070928	-0.219498	4.21396	5.19127	0.0227007	0.389457	NA	NA	NA	NA	NA	NA
NA_GPSM2_Quigley201207_XENLA_00052307	-0.203603	7.25958	5.18568	0.0227738	0.390034	NA_GPSM2_Quigley201207_XENLA_00052307	PTHR10098:SF39	G-PROTEIN-SIGNALING MODULATOR 2	GO SLIM	GO:0005083	small GTPase regulator activity
NA_TMSB4X_Chung201110_XENLA_00085031	-0.204407	7.35629	5.18367	0.0228001	0.390034	NA	NA	NA	NA	NA	NA
NA_TTC39B_XeXenL6RMv10048456m	-0.257069	2.54068	5.1832	0.0228063	0.390034	NA	NA	NA	NA	NA	NA
NA_ADAM17_XeXenL6RMv10037001m	-0.250835	2.55351	5.18133	0.0228309	0.390034	NA_ADAM17_XeXenL6RMv10037001m	PTHR11905	ADAM (A DISINTEGRIN AND METALLOPROTEASE DOMAIN)	GO SLIM	GO:0016787	hydrolase activity
NA_SMAD9_Taira201203_XENLA_stage_00145870	-0.239388	2.94776	5.18059	0.0228406	0.390034	NA	NA	NA	NA	NA	NA
NA_NA_Taira201203_XENLA_tissue_00058115	-0.213935	4.66534	5.17703	0.0228874	0.390118	NA	NA	NA	NA	NA	NA
Rasl11b_RASL11B_TeperekTkacz201206_XENLA_00026584	0.214497	6.04607	5.1762	0.0228984	0.390118	NA	NA	NA	NA	NA	NA
Mesp1_NM_001097962.1	-0.228481	3.60276	5.17367	0.0229317	0.390118	NA	NA	NA	NA	NA	NA
NA_GS17_Taira201203_XENLA_stage_00136612	-0.210865	5.77161	5.17163	0.0229587	0.390118	NA	NA	NA	NA	NA	NA
Sec62_BC077513.1	-0.214146	4.6644	5.17105	0.0229663	0.390118	NA	NA	NA	NA	NA	NA
NA_TTC17_TeperekTkacz201206_XENLA_00046134	0.324675	0.849119	5.17053	0.0229731	0.390118	NA	NA	NA	NA	NA	NA
Atg16l1_NM_001097968.1	-0.204622	6.83198	5.16217	0.023084	0.391638	NA	NA	NA	NA	NA	NA
NA_BC073068.1	-0.254123	2.41141	5.16005	0.0231122	0.391754	NA_BC073068.1	PTHR11389	ZINC FINGER PROTEIN	GO SLIM	GO:0003676	nucleic acid binding
Txn2_TXN2_Quigley201112_XENLA_00105035	-0.248557	3.38856	5.15571	0.0231701	0.392018	Txn2_TXN2_Quigley201112_XENLA_00105035	PTHR10438	THIOREDOXIN-RELATED	GO SLIM	GO:0016491	oxidoreductase activity
NA_SOCS6_XeXenL6RMv10036537m	0.234921	3.03856	5.15567	0.0231705	0.392018	NA_SOCS6_XeXenL6RMv10036537m	PTHR10385	SUPPRESSOR OF CYTOKINE SIGNALING	GO SLIM	GO:0005125	cytokine activity
Iqgap3_IQGAP3_Taira201203_XENLA_stage_00158637	0.259369	2.417	5.15205	0.023219	0.392443	Iqgap3_IQGAP3_Taira201203_XENLA_stage_00158637	PTHR14149	RAS GTPASE-ACTIVATING PROTEIN WITH IQ MOTIF	GO SLIM	GO:0005083	small GTPase regulator activity
Got2_BC106354.1	0.251426	2.79523	5.14938	0.0232547	0.392443	Got2_BC106354.1	PTHR11879	ASPARTATE AMINOTRANSFERASE	GO SLIM	GO:0008483	transaminase activity
Cdc7_NM_001088409.1	0.295647	1.44595	5.14831	0.023269	0.392443	Cdc7_NM_001088409.1	PTHR11909:SF7	CELL DIVISION CONTROL PROTEIN 7	GO SLIM	GO:0016740	transferase activity
NA_RAB9A_Taira201203_XENLA_tissue_00247366	-0.280182	1.67852	5.14717	0.0232842	0.392443	NA_RAB9A_Taira201203_XENLA_tissue_00247366	PTHR24073	FAMILY NOT NAMED	GO SLIM	GO:0003924	GTPase activity
NA_PLEKHA5_Taira201203_XENLA_tissue_00164285	-0.259536	2.26539	5.14403	0.0233264	0.392443	NA	NA	NA	NA	NA	NA
NA_CHPF_Ismailoglu201203_XENLA_00043658	0.212942	4.87623	5.14371	0.0233307	0.392443	NA_CHPF_Ismailoglu201203_XENLA_00043658	PTHR12369	CHONDROITIN SYNTHASE	GO SLIM	GO:0016740	transferase activity
NA_TMEM39B_XeXenL6RMv10027699m	-0.278114	1.79126	5.14261	0.0233455	0.392443	NA	NA	NA	NA	NA	NA
NA_KIAA1279_mgEST_Xl4jul2012_1013093975	-0.218837	4.35075	5.13795	0.0234082	0.393138	NA	NA	NA	NA	NA	NA
Aasdh_AASDH_Taira201203_XENLA_stage_00129507	0.214156	4.57395	5.13365	0.0234664	0.393754	Aasdh_AASDH_Taira201203_XENLA_stage_00129507	PTHR24095:SF11	SUBFAMILY NOT NAMED	GO SLIM	GO:0016874	ligase activity
Txlng_TXLNG_Quigley201207_XENLA_00104488	-0.207033	5.57325	5.13027	0.023512	0.394159	Txlng_TXLNG_Quigley201207_XENLA_00104488	PTHR16127	TAXILIN	GO SLIM	GO:0042742	defense response to bacterium
Cd81_NM_001093546.1	0.22361	4.01992	5.12359	0.0236028	0.39532	Cd81_NM_001093546.1	PTHR19282:SF19	CD81	GO SLIM	GO:0005515	protein binding
NA_RAD51D_Taira201203_XENLA_tissue_00146127	-0.243233	2.75073	5.11671	0.0236965	0.396528	NA_RAD51D_Taira201203_XENLA_tissue_00146127	PTHR22942	RECA/RAD51/RADA DNA STRAND-PAIRING FAMILY MEMBER	GO SLIM	GO:0003676	nucleic acid binding
Pif1_PIF1_Ismailoglu201203_XENLA_00038882	0.225107	3.673	5.11268	0.0237516	0.397086	Pif1_PIF1_Ismailoglu201203_XENLA_00038882	PTHR23274	DNA HELICASE-RELATED	GO SLIM	GO:0003678	DNA helicase activity
Ccdc62_NP_001106434.1_Taira201203_XENLA_stage_00089540	-0.238597	2.94867	5.11017	0.023786	0.397088	NA	NA	NA	NA	NA	NA
NA_IDH3A_Taira201203_XENLA_tissue_00146113	0.283088	1.75519	5.10952	0.0237949	0.397088	NA_IDH3A_Taira201203_XENLA_tissue_00146113	PTHR11835	DECARBOXYLATING DEHYDROGENASES-ISOCITRATE, ISOPROPYLMALATE, TARTRATE	GO SLIM	GO:0016491	oxidoreductase activity
Fahd1_FAHD1_Kwon201107_XENLA_00119391	-0.271748	1.93918	5.10691	0.0238307	0.397272	Fahd1_FAHD1_Kwon201107_XENLA_00119391	PTHR11820	FUMARYLACETOACETATE HYDROLASE	GO SLIM	GO:0003824	catalytic activity
NA_NP_001120298.1_Taira201203_XENLA_tissue_00285874	0.247581	2.46564	5.10556	0.0238493	0.397272	NA_NP_001120298.1_Taira201203_XENLA_tissue_00285874	PTHR10063	TUBERIN	GO SLIM	GO:0005083	small GTPase regulator activity
NA_NEDD4L_Taira201203_XENLA_stage_00043295	-0.215146	4.31098	5.10164	0.0239033	0.397514	NA_NEDD4L_Taira201203_XENLA_stage_00043295	PTHR11254	HECT DOMAIN UBIQUITIN-PROTEIN LIGASE	GO SLIM	GO:0016874	ligase activity
Klhl28_KLHL28_Taira201203_XENLA_tissue_00257262	0.244627	2.61275	5.10135	0.0239072	0.397514	NA	NA	NA	NA	NA	NA
NA_PSMB7_TeperekTkacz201206_XENLA_00047398	0.210234	4.93827	5.09549	0.0239882	0.398012	NA_PSMB7_TeperekTkacz201206_XENLA_00047398	PTHR11599	PROTEASOME SUBUNIT ALPHA/BETA	GO SLIM	GO:0016787	hydrolase activity
NA_KPNA2_Taira201203_XENLA_stage_00049077	0.202201	7.24988	5.09485	0.023997	0.398012	NA_KPNA2_Taira201203_XENLA_stage_00049077	PTHR23316	IMPORTIN ALPHA	GO SLIM	GO:0006605	protein targeting
Cnfn_CNFN.1_Park201106_XENLA_00033552	0.25311	2.54494	5.0942	0.024006	0.398012	NA	NA	NA	NA	NA	NA
Tmlhe_TMLHE_TC417096	0.24272	2.79972	5.09277	0.0240258	0.398012	Tmlhe_TMLHE_TC417096	PTHR10696:SF2	TRIMETHYLLYSINE DIOXYGENASE, MITOCHONDRIAL PRECURSOR (EPSILON-TRIMETHYLLYSINE 2-OXOGLUTARATE DIOXYGENASE)	GO SLIM	GO:0016491	oxidoreductase activity
NA_AG1_Quigley201207_XENLA_00029258	0.236672	3.47396	5.0903	0.02406	0.398012	NA_AG1_Quigley201207_XENLA_00029258	PTHR15337:SF1	ANTERIOR GRADIENT PROTEIN (SECRETED CEMENT GLAND PROTEIN)	GO SLIM	GO:0016491	oxidoreductase activity
Cxcr7_CXCR7_Taira201203_XENLA_tissue_00229192	0.233256	3.23672	5.08943	0.0240721	0.398012	NA	NA	NA	NA	NA	NA
Mesp1_MESPB_Taira201203_XENLA_stage_00085596	-0.231472	3.35867	5.08666	0.0241106	0.398012	NA	NA	NA	NA	NA	NA
Cdca7_CDCA7_XeXenL6RMv10009637m	0.215685	4.40099	5.08535	0.0241289	0.398012	NA	NA	NA	NA	NA	NA
NA_MLL3_Quigley201112_XENLA_00014744	0.255135	2.72798	5.08509	0.0241325	0.398012	NA	NA	NA	NA	NA	NA
NA_NA_Taira201203_XENLA_tissue_00024108	0.221727	4.71081	5.07908	0.0242163	0.398582	NA	NA	NA	NA	NA	NA
Arid5b_ARID5B_Kwon201107_XENLA_00132721	-0.251934	2.35255	5.07813	0.0242295	0.398582	Arid5b_ARID5B_Kwon201107_XENLA_00132721	PTHR13964	RBP-RELATED	GO SLIM	GO:0003676	nucleic acid binding
Psme4_NM_001091397.1	-0.201638	7.3348	5.07793	0.0242322	0.398582	NA	NA	NA	NA	NA	NA
NA_RPS29_Ismailoglu201203_XENLA_00031276	0.212279	4.90485	5.07442	0.0242813	0.399032	NA	NA	NA	NA	NA	NA
Hspg2_HSPG2_Taira201203_XENLA_stage_00182047	0.252546	2.56427	5.06685	0.0243877	0.400297	Hspg2_HSPG2_Taira201203_XENLA_stage_00182047	PTHR10489	CELL ADHESION MOLECULE	GO SLIM	GO:0007154	cell communication
Per3_PER3_Taira201203_XENLA_tissue_00043086	-0.207048	5.31604	5.06583	0.024402	0.400297	Per3_PER3_Taira201203_XENLA_tissue_00043086	PTHR11269:SF13	PERIOD CIRCADIAN PROTEIN 3	GO SLIM	GO:0003676	nucleic acid binding
Sema3f_SEMA3F_Amin201106_XENLA_00046185	-0.20873	5.11276	5.0616	0.0244617	0.400918	Sema3f_SEMA3F_Amin201106_XENLA_00046185	PTHR11036	SEMAPHORIN	GO SLIM	GO:0005515	protein binding
NA_NA_Taira201203_XENLA_tissue_00000016	0.228172	3.46416	5.0585	0.0245054	0.401108	NA_NA_Taira201203_XENLA_tissue_00000016	PTHR15073	MICROTUBULE-ASSOCIATED PROTEIN	GO SLIM	GO:0008092	cytoskeletal protein binding
Ccdc89_NM_001089115.1	-0.238682	2.82916	5.05768	0.024517	0.401108	NA	NA	NA	NA	NA	NA
NA_DDX56_Taira201203_XENLA_stage_00060133	-0.203279	6.19476	5.05312	0.0245816	0.401807	NA_DDX56_Taira201203_XENLA_stage_00060133	PTHR24031	FAMILY NOT NAMED	GO SLIM	GO:0003676	nucleic acid binding
Nsun7_NSUN7_Quigley201207_XENLA_00024138	-0.239421	2.7903	5.04912	0.0246384	0.40198	NA	NA	NA	NA	NA	NA
Siva1_BC099282.1	-0.252441	2.41815	5.0487	0.0246444	0.40198	NA	NA	NA	NA	NA	NA
NA_NA_Taira201203_XENLA_stage_00072193	-0.202776	7.04924	5.04775	0.024658	0.40198	NA	NA	NA	NA	NA	NA
NA_GS17_Taira201203_XENLA_stage_00110783	-0.20796	5.82173	5.04537	0.0246918	0.402087	NA	NA	NA	NA	NA	NA
NA_BC072375.1	0.238213	3.02369	5.0431	0.0247242	0.402087	NA_BC072375.1	PTHR10383:SF12	SERINE INCORPORATOR 2 (TUMOR DIFFERENTIALLY EXPRESSED 2-LIKE)	Panther Class	PC00226	transmembrane receptor regulatory/adaptor protein
Chmp1a_NM_001091237.1	0.248257	2.8125	5.04267	0.0247303	0.402087	Chmp1a_NM_001091237.1	PTHR10476	CHARGED MULTIVESICULAR BODY PROTEIN	GO SLIM	GO:0016192	vesicle-mediated transport
Fam212a_NM_001096729.1	-0.223816	4.09269	5.03896	0.0247834	0.402384	NA	NA	NA	NA	NA	NA
NA_BC133788.1	-0.211957	5.3997	5.03832	0.0247925	0.402384	NA	NA	NA	NA	NA	NA
Rnf130_RNF130_Taira201203_XENLA_tissue_00248133	-0.300333	1.55706	5.03509	0.0248388	0.402779	Rnf130_RNF130_Taira201203_XENLA_tissue_00248133	PTHR22765:SF4	GOLIATH E3 UBIQUITIN LIGASE	GO SLIM	GO:0016874	ligase activity
NA_RPL35_TC424430	0.20701	5.7283	5.03247	0.0248764	0.403032	NA_RPL35_TC424430	PTHR13872	60S RIBOSOMAL PROTEIN L35	GO SLIM	GO:0016740	transferase activity
Jak1_JAK1_Park201106_XENLA_00048503	-0.208071	4.94089	5.02696	0.0249557	0.403749	Jak1_JAK1_Park201106_XENLA_00048503	PTHR24418	TYROSINE-PROTEIN KINASE	GO SLIM	GO:0016740	transferase activity
NA_UXT_Ismailoglu201203_XENLA_00042820	0.272944	1.84805	5.02634	0.0249646	0.403749	NA	NA	NA	NA	NA	NA
NA_KRT12_TeperekTkacz201202_XENLA_00002098	0.204134	6.24723	5.02429	0.0249942	0.403871	NA_KRT12_TeperekTkacz201202_XENLA_00002098	PTHR23239	INTERMEDIATE FILAMENT	GO SLIM	GO:0005200	structural constituent of cytoskeleton
Cdc14a_CDC14A_Taira201203_XENLA_stage_00147231	0.245998	2.63711	5.02207	0.0250263	0.403996	Cdc14a_CDC14A_Taira201203_XENLA_stage_00147231	PTHR23339	TYROSINE SPECIFIC PROTEIN PHOSPHATASE AND DUAL SPECIFICITY PROTEIN PHOSPHATASE	GO SLIM	GO:0016787	hydrolase activity
NA_SYS1_Park201106_XENLA_00018441	0.236487	2.95953	5.01847	0.0250783	0.403996	NA_SYS1_Park201106_XENLA_00018441	PTHR12952	SYS1	GO SLIM	GO:0022857	transmembrane transporter activity
Pcbp2_PCBP3_TC428141	0.207961	5.60004	5.01491	0.0251299	0.403996	Pcbp2_PCBP3_TC428141	PTHR10288	KH DOMAIN CONTAINING RNA BINDING PROTEIN	GO SLIM	GO:0031202	RNA splicing factor activity, transesterification mechanism
Ndnf_NDNF_Park201106_XENLA_00064111	0.285917	1.59445	5.01366	0.025148	0.403996	NA	NA	NA	NA	NA	NA
NA_SOCS4_Taira201203_XENLA_stage_00005864	0.255446	2.51	5.01356	0.0251495	0.403996	NA_SOCS4_Taira201203_XENLA_stage_00005864	PTHR10385	SUPPRESSOR OF CYTOKINE SIGNALING	GO SLIM	GO:0005125	cytokine activity
NA_BCOR_Ismailoglu201203_XENLA_00046820	0.203814	5.93313	5.01321	0.0251546	0.403996	NA	NA	NA	NA	NA	NA
Tnrc18_TNRC18_Taira201203_XENLA_stage_00183869	-0.200371	7.07827	5.01259	0.0251637	0.403996	Tnrc18_TNRC18_Taira201203_XENLA_stage_00183869	PTHR12505	PHD FINGER TRANSCRIPTION FACTOR	GO SLIM	GO:0003676	nucleic acid binding
NA_NM_001097911.1	0.231637	3.63887	5.01159	0.0251782	0.403996	NA_NM_001097911.1	PTHR24073	FAMILY NOT NAMED	GO SLIM	GO:0003924	GTPase activity
NA_PPP3CB_TC414043	-0.213156	4.50933	5.00956	0.0252077	0.404027	NA_PPP3CB_TC414043	PTHR11668:SF15	SERINE/THREONINE PROTEIN PHOSPHATASE 2B CATALYTIC SUBUNIT (CALCINEURIN A)	GO SLIM	GO:0016787	hydrolase activity
NA_FAM208B_Taira201203_XENLA_tissue_00188918	0.233925	2.96808	5.00843	0.0252242	0.404027	NA	NA	NA	NA	NA	NA
NA_FAM46A_mgEST_Xl4jul2012_1013102157	0.225318	3.71946	5.00063	0.0253381	0.405497	NA	NA	NA	NA	NA	NA
NA_SLBP_Ismailoglu201203_XENLA_00012730	0.204288	6.00568	4.99726	0.0253875	0.405935	NA_SLBP_Ismailoglu201203_XENLA_00012730	PTHR17408	HISTONE RNA HAIRPIN-BINDING PROTEIN	GO SLIM	GO:0003676	nucleic acid binding
NA_FAM83G_Kwon201107_XENLA_00128279	-0.237705	2.83478	4.99212	0.0254631	0.406573	NA	NA	NA	NA	NA	NA
NA_CRY2_TC416752	-0.2616	2.24385	4.99152	0.0254718	0.406573	NA_CRY2_TC416752	PTHR11455	CRYPTOCHROME	GO SLIM	GO:0016829	lyase activity
NA_ZCCHC11_XeXenL6RMv10008627m	-0.266734	1.83764	4.98083	0.0256297	0.408738	NA_ZCCHC11_XeXenL6RMv10008627m	PTHR12271	POLY(A) POLYMERASE CID (PAP)-RELATED	GO SLIM	GO:0016740	transferase activity
NA_NM_001091795.1	0.205985	5.29445	4.97467	0.0257211	0.409839	NA	NA	NA	NA	NA	NA
NA_MFSD2A_XeXenL6RMv10032624m	0.237425	2.87609	4.97147	0.0257688	0.410133	NA	NA	NA	NA	NA	NA
NA_NM_001092197.1	-0.241336	2.73854	4.97043	0.0257843	0.410133	NA_NM_001092197.1	PTHR13423	OUT AT FIRST	GO SLIM	GO:0007398	ectoderm development
NA_FILIP1_Taira201203_XENLA_tissue_00134160	-0.22001	3.83198	4.96668	0.0258401	0.410455	NA	NA	NA	NA	NA	NA
NA_NM_001085880.1	0.207311	5.07769	4.96534	0.0258602	0.410455	NA_NM_001085880.1	PTHR23233	ZINC FINGER PROTEIN	GO SLIM	GO:0003676	nucleic acid binding
NA_ISCU_mgEST_Xl4jul2012_1013087876	0.206955	5.91588	4.96458	0.0258717	0.410455	NA_ISCU_mgEST_Xl4jul2012_1013087876	PTHR10093	IRON-SULFUR CLUSTER ASSEMBLY ENZYME (NIFU HOMOLOG)	GO SLIM	GO:0006732	coenzyme metabolic process
NA_MLL_Kwon201107_XENLA_00108093	0.276721	1.58281	4.95837	0.0259647	0.411576	NA_MLL_Kwon201107_XENLA_00108093	PTHR26218:SF6	SUBFAMILY NOT NAMED	GO SLIM	GO:0003676	nucleic acid binding
Fbf1_A8KBF4_XENTR_Kwon201107_XENLA_00011770	-0.206012	5.15894	4.95509	0.026014	0.412001	NA	NA	NA	NA	NA	NA
NA_NA_TeperekTkacz201206_XENLA_00119951	0.253875	2.45531	4.94512	0.0261644	0.413651	NA_NA_TeperekTkacz201206_XENLA_00119951	PTHR23277:SF30	SUBFAMILY NOT NAMED	GO SLIM	GO:0004872	receptor activity
NA_NM_001088923.1	-0.218006	3.85442	4.94354	0.0261884	0.413651	NA_NM_001088923.1	PTHR24346	MAP/MICROTUBULE AFFINITY-REGULATING KINASE	GO SLIM	GO:0016740	transferase activity
Nobox_NA_Taira201203_XENLA_stage_00042541	-0.215731	4.25412	4.94272	0.0262008	0.413651	NA	NA	NA	NA	NA	NA
NA_KRT_TC431575	0.199477	7.80289	4.94222	0.0262084	0.413651	NA_KRT_TC431575	PTHR23239	INTERMEDIATE FILAMENT	GO SLIM	GO:0005200	structural constituent of cytoskeleton
Atp9b_ATP9B_Taira201203_XENLA_stage_00155450	-0.212336	4.34505	4.93877	0.0262607	0.414057	Atp9b_ATP9B_Taira201203_XENLA_stage_00155450	PTHR24092	FAMILY NOT NAMED	GO SLIM	GO:0016787	hydrolase activity
NA_SLC39A13_Taira201203_XENLA_stage_00084226	0.228914	3.34403	4.93748	0.0262803	0.414057	NA_SLC39A13_Taira201203_XENLA_stage_00084226	PTHR16950:SF6	SOLUTE CARRIER FAMILY 39 (ZINC TRANSPORTER), MEMBER 13	GO SLIM	GO:0022857	transmembrane transporter activity
NA_NM_001086953.1	-0.211547	4.3609	4.93502	0.0263178	0.414057	NA_NM_001086953.1	PTHR10603	FRAGILE X MENTAL RETARDATION SYNDROME-RELATED PROTEIN	GO SLIM	GO:0003676	nucleic acid binding
NA_NM_001093278.1	0.213207	4.47034	4.93428	0.026329	0.414057	NA	NA	NA	NA	NA	NA
NA_TRPM5_XeXenL6RMv10048127m	0.288605	1.51829	4.9331	0.026347	0.414057	NA_TRPM5_XeXenL6RMv10048127m	PTHR13800	TRANSIENT RECEPTOR POTENTIAL CATION CHANNEL, SUBFAMILY M, MEMBER 6	GO SLIM	GO:0004872	receptor activity
Tob1_NM_001089653.1	0.212706	4.70874	4.93148	0.0263717	0.41409	Tob1_NM_001089653.1	PTHR17537	TRANSDUCER OF ERBB2 (TOB)	GO SLIM	GO:0007166	cell surface receptor linked signal transduction
NA_NA_TC440758	-0.255985	2.17475	4.92933	0.0264045	0.41425	NA	NA	NA	NA	NA	NA
NA_RP11-1035H13.3.1_Taira201203_XENLA_stage_00128883	0.221186	3.74811	4.92553	0.0264627	0.414808	NA_RP11-1035H13.3.1_Taira201203_XENLA_stage_00128883	PTHR11758	30S RIBOSOMAL PROTEIN S8	GO SLIM	GO:0003735	structural constituent of ribosome
NA_UNG_Taira201203_XENLA_stage_00161534	0.219695	3.79094	4.92137	0.0265265	0.415454	NA_UNG_Taira201203_XENLA_stage_00161534	PTHR11264	URACIL-DNA GLYCOSYLASE	GO SLIM	GO:0016787	hydrolase activity
NA_OTUB1_Ismailoglu201203_XENLA_00064591	0.208555	4.73863	4.91972	0.0265519	0.415496	NA_OTUB1_Ismailoglu201203_XENLA_00064591	PTHR12931	UBIQUITIN THIOLESTERASE PROTEIN OTUB	GO SLIM	GO:0016787	hydrolase activity
Galk1_GALK1_Taira201203_XENLA_tissue_00023957	0.257004	2.21686	4.91236	0.0266651	0.416912	Galk1_GALK1_Taira201203_XENLA_tissue_00023957	PTHR10457	MEVALONATE KINASE/GALACTOKINASE	GO SLIM	GO:0016740	transferase activity
NA_CGNL1_Kwon201107_XENLA_00090685	-0.207418	4.79508	4.90874	0.0267211	0.417432	NA	NA	NA	NA	NA	NA
NA_NM_001122597.1	0.199882	6.53246	4.90589	0.0267652	0.417765	NA_NM_001122597.1	PTHR11304:SF18	EPHRIN-B2	GO SLIM	GO:0005515	protein binding
NA_SEPT5_Taira201203_XENLA_tissue_00161213	0.283651	1.74746	4.90357	0.0268012	0.41797	NA_SEPT5_Taira201203_XENLA_tissue_00161213	PTHR18884	SEPTIN	GO SLIM	GO:0003924	GTPase activity
NA_BC072255.1	-0.202062	5.64467	4.89933	0.0268671	0.418642	NA_BC072255.1	PTHR22993	FORMAMIDOPYRIMIDINE-DNA GLYCOSYLASE	GO SLIM	GO:0016788	hydrolase activity, acting on ester bonds
Kdm8_JMJD5_Taira201203_XENLA_stage_00052578	0.264877	1.9108	4.89684	0.0269058	0.418885	NA	NA	NA	NA	NA	NA
NA_NMRAL1_XeXenL6RMv10012114m	-0.21987	4.17225	4.8954	0.0269283	0.418885	NA	NA	NA	NA	NA	NA
Sdf4_SDF4_Quigley201207_XENLA_00053925	0.206903	4.85155	4.89159	0.0269878	0.419117	Sdf4_SDF4_Quigley201207_XENLA_00053925	PTHR10827	RETICULOCALBIN	GO SLIM	GO:0005509	calcium ion binding
Trnt1_NM_001096379.1	-0.253305	2.15246	4.89028	0.0270083	0.419117	Trnt1_NM_001096379.1	PTHR13734	TRNA-NUCLEOTIDYLTRANSFERASE/POLY(A) POLYMERASE FAMILY MEMBER	GO SLIM	GO:0016740	transferase activity
Pla2g4f_PLA2G4F_XeXenL6RMv10055768m	-0.258605	2.08591	4.88961	0.0270188	0.419117	Pla2g4f_PLA2G4F_XeXenL6RMv10055768m	PTHR10728	CYTOSOLIC PHOSPHOLIPASE A2	GO SLIM	GO:0016787	hydrolase activity
NA_NM_001099900.1	-0.20412	5.20131	4.8886	0.0270347	0.419117	NA_NM_001099900.1	PTHR11142	PSEUDOURIDYLATE SYNTHASE	GO SLIM	GO:0016829	lyase activity
Chga_NM_001094724.1	0.298804	1.08092	4.88057	0.0271607	0.420715	Chga_NM_001094724.1	PTHR10583	CHROMOGRANIN	GO SLIM	GO:0005515	protein binding
Atp1b1_NM_001086759.1	0.207359	4.77557	4.87489	0.0272502	0.421423	Atp1b1_NM_001086759.1	PTHR11523:SF10	SODIUM/POTASSIUM-DEPENDENT ATPASE BETA-1 SUBUNIT	GO SLIM	GO:0022857	transmembrane transporter activity
Zfp277_ZNF277_Taira201203_XENLA_tissue_00104760	-0.230358	3.10028	4.87476	0.0272523	0.421423	Zfp277_ZNF277_Taira201203_XENLA_tissue_00104760	PTHR13267	ZINC FINGER PROTEIN 277	GO SLIM	GO:0003676	nucleic acid binding
NA_TMEM8A_XeXenL6RMv10015662m	0.249557	2.27205	4.87185	0.0272982	0.421777	NA_TMEM8A_XeXenL6RMv10015662m	PTHR14319	FIVE-SPAN TRANSMEMBRANE PROTEIN M83	GO SLIM	GO:0007154	cell communication
NA_SYPL1_XeXenL6RMv10022280m	0.229139	3.47474	4.86431	0.0274178	0.423076	NA_SYPL1_XeXenL6RMv10022280m	PTHR10306	SYNAPTOPHYSIN	GO SLIM	GO:0006886	intracellular protein transport
NA_PKDCC.1_XeXenL6RMv10013085m	0.222295	3.53758	4.86364	0.0274284	0.423076	NA_PKDCC.1_XeXenL6RMv10013085m	PTHR23257:SF101	SUBFAMILY NOT NAMED	GO SLIM	GO:0016740	transferase activity
NA_NA_TeperekTkacz201202_XENLA_00000433	0.260754	2.08243	4.85942	0.0274955	0.423571	NA	NA	NA	NA	NA	NA
NA_IFI30_Park201106_XENLA_00058718	0.220825	3.52651	4.85806	0.0275173	0.423571	NA_IFI30_Park201106_XENLA_00058718	PTHR13234	GAMMA-INTERFERON INDUCIBLE LYSOSOMAL THIOL REDUCTASE (GILT)	GO SLIM	GO:0016491	oxidoreductase activity
NA_LSM2_XeXenL6RMv10045274m	0.207092	4.70501	4.85727	0.0275298	0.423571	NA_LSM2_XeXenL6RMv10045274m	PTHR13829	SNRNP CORE PROTEIN FAMILY MEMBER	GO SLIM	GO:0003676	nucleic acid binding
NA_KRT_Quigley201112_XENLA_00082264	0.197355	8.55796	4.85542	0.0275593	0.42367	NA_KRT_Quigley201112_XENLA_00082264	PTHR23239	INTERMEDIATE FILAMENT	GO SLIM	GO:0005200	structural constituent of cytoskeleton
NA_SLC30A3_TeperekTkacz201202_XENLA_00068393	0.206549	5.63139	4.85269	0.027603	0.423985	NA	NA	NA	NA	NA	NA
NA_NM_001086964.1	0.199015	6.35036	4.84622	0.0277067	0.424453	NA_NM_001086964.1	PTHR23316	IMPORTIN ALPHA	GO SLIM	GO:0006605	protein targeting
NA_CRABP2_Taira201203_XENLA_stage_00059187	0.211447	4.60515	4.84518	0.0277234	0.424453	NA_CRABP2_Taira201203_XENLA_stage_00059187	PTHR11955	FATTY ACID BINDING PROTEIN	GO SLIM	GO:0008289	lipid binding
Fbxw2_FBXW2_Taira201203_XENLA_stage_00159932	0.278496	1.64296	4.84457	0.0277332	0.424453	NA	NA	NA	NA	NA	NA
Tyw3_BC082379.1	-0.198521	6.43657	4.84348	0.0277509	0.424453	Tyw3_BC082379.1	PTHR23245	UNCHARACTERIZED	GO SLIM	GO:0008168	methyltransferase activity
Fxyd4_DQ096943.1	0.200188	6.32547	4.83914	0.0278208	0.424453	Fxyd4_DQ096943.1	PTHR14132:SF2	CHLORIDE CONDUCTANCE INDUCER PROTEIN MAT-8	GO SLIM	GO:0005515	protein binding
NA_SNCB_Audic201207_XENLA_00007672	0.273365	1.61161	4.83806	0.0278381	0.424453	NA_SNCB_Audic201207_XENLA_00007672	PTHR13820	SYNUCLEIN	GO SLIM	GO:0007154	cell communication
NA_RAD51_Taira201203_XENLA_tissue_00112571	0.212746	4.64357	4.83724	0.0278515	0.424453	NA_RAD51_Taira201203_XENLA_tissue_00112571	PTHR22942:SF12	DNA REPAIR PROTEIN RAD51	GO SLIM	GO:0003676	nucleic acid binding
Cenpl_NM_001097027.1	0.223837	3.44319	4.83661	0.0278617	0.424453	NA	NA	NA	NA	NA	NA
NA_UHRF1_Taira201203_XENLA_stage_00020217	-0.200022	5.77743	4.83657	0.0278622	0.424453	NA_UHRF1_Taira201203_XENLA_stage_00020217	PTHR14140	E3 UBIQUITIN-PROTEIN LIGASE UHRF	GO SLIM	GO:0003676	nucleic acid binding
NA_NA_TC445472	0.201644	5.97758	4.83524	0.0278837	0.424453	NA_NA_TC445472	PTHR10985	BASIC HELIX-LOOP-HELIX TRANSCRIPTION FACTOR, HES-RELATED	GO SLIM	GO:0003676	nucleic acid binding
NA_NM_001095796.1	0.209641	5.18827	4.83498	0.027888	0.424453	NA_NM_001095796.1	PTHR11771:SF7	ARACHIDONATE LIPOXYGENASE-RELATED	GO SLIM	GO:0016491	oxidoreductase activity
NA_PDE4DIP_Taira201203_XENLA_tissue_00107307	-0.207701	4.47918	4.83309	0.0279185	0.424565	NA_PDE4DIP_Taira201203_XENLA_tissue_00107307	PTHR13895:SF2	PHOSPHODIESTERASE 4D INTERACTING PROTEIN (MYOMEGALIN)	GO SLIM	GO:0007398	ectoderm development
NA_PCDH8L_Taira201203_XENLA_stage_00137150	0.233516	3.38157	4.83111	0.0279507	0.424649	NA_PCDH8L_Taira201203_XENLA_stage_00137150	PTHR24028	FAMILY NOT NAMED	GO SLIM	GO:0005509	calcium ion binding
Mapk1_MAPK1_TC438601	0.203541	5.45287	4.82871	0.0279896	0.424649	Mapk1_MAPK1_TC438601	PTHR24055	MITOGEN-ACTIVATED PROTEIN KINASE	GO SLIM	GO:0016740	transferase activity
NA_TMEM167B_Audic201207_XENLA_00005407	0.222774	3.66425	4.82847	0.0279935	0.424649	NA	NA	NA	NA	NA	NA
NA_NR3C1_Taira201203_XENLA_stage_00163674	0.309378	0.922987	4.82469	0.0280549	0.425229	NA_NR3C1_Taira201203_XENLA_stage_00163674	PTHR24084	FAMILY NOT NAMED	GO SLIM	GO:0003676	nucleic acid binding
NA_L36805.1	-0.204568	5.17442	4.82155	0.028106	0.425446	NA	NA	NA	NA	NA	NA
NA_STK25_XeXenL6RMv10038646m	0.269223	1.86358	4.81911	0.0281459	0.425446	NA_STK25_XeXenL6RMv10038646m	PTHR24361:SF95	SUBFAMILY NOT NAMED	GO SLIM	GO:0016740	transferase activity
Nox1_NOX1_Taira201203_XENLA_tissue_00235846	0.227003	3.34646	4.8181	0.0281624	0.425446	Nox1_NOX1_Taira201203_XENLA_tissue_00235846	PTHR11972:SF10	NADPH OXIDASE 1	GO SLIM	GO:0016491	oxidoreductase activity
NA_OSR1_Park201106_XENLA_00039544	0.283526	1.68411	4.81709	0.0281789	0.425446	NA_OSR1_Park201106_XENLA_00039544	PTHR14196	ODD-SKIPPED - RELATED	GO SLIM	GO:0003676	nucleic acid binding
NA_TNRC18_Kwon201107_XENLA_00092272	-0.198651	6.08425	4.8167	0.0281852	0.425446	NA_TNRC18_Kwon201107_XENLA_00092272	PTHR12505	PHD FINGER TRANSCRIPTION FACTOR	GO SLIM	GO:0003676	nucleic acid binding
NA_NKX6-2_XeXenL6RMv10050576m	0.286357	1.81864	4.81133	0.0282733	0.426424	NA_NKX6-2_XeXenL6RMv10050576m	PTHR24340	FAMILY NOT NAMED	GO SLIM	GO:0007498	mesoderm development
NA_NM_001085445.1	0.219268	3.57786	4.80943	0.0283044	0.426543	NA_NM_001085445.1	PTHR16771	26 PROTEASOME COMPLEX SUBUNIT DSS1	GO SLIM	GO:0019538	protein metabolic process
Vldlr_VLDLR_TC414629	0.2151	4.23174	4.80162	0.0284329	0.428128	Vldlr_VLDLR_TC414629	PTHR10529:SF101	VERY LOW-DENSITY LIPOPROTEIN RECEPTOR	GO SLIM	GO:0004872	receptor activity
Gpn2_GPN2_Taira201203_XENLA_stage_00077767	-0.225224	3.21624	4.7967	0.0285143	0.428545	Gpn2_GPN2_Taira201203_XENLA_stage_00077767	PTHR21231	XPA-BINDING PROTEIN 1-RELATED	GO SLIM	GO:0003676	nucleic acid binding
Pan2_PAN2_Ismailoglu201203_XENLA_00044268	-0.198537	5.9621	4.79573	0.0285303	0.428545	Pan2_PAN2_Ismailoglu201203_XENLA_00044268	PTHR15728	UBIQUITIN SPECIFIC PROTEASE 52 / POLY(A) RIBONUCLEASE SUBUNIT PAN2	GO SLIM	GO:0016787	hydrolase activity
Tmem38b_NM_001092537.1	-0.233232	3.15303	4.79571	0.0285308	0.428545	NA	NA	NA	NA	NA	NA
NA_LLGL1_TeperekTkacz201206_XENLA_00060597	-0.198281	6.55093	4.79008	0.0286241	0.429596	NA_LLGL1_TeperekTkacz201206_XENLA_00060597	PTHR10241	LETHAL(2) GIANT LARVAE PROTEIN	GO SLIM	GO:0007269	neurotransmitter secretion
NA_CCDC50_Ismailoglu201203_XENLA_00063044	-0.204118	5.04101	4.78655	0.0286829	0.429984	NA	NA	NA	NA	NA	NA
NA_KLHL28_XeXenL6RMv10026223m	0.257028	1.90867	4.78571	0.0286969	0.429984	NA	NA	NA	NA	NA	NA
NA_CDKN2AIP_TeperekTkacz201202_XENLA_00032461	-0.216673	3.72882	4.77733	0.0288368	0.431729	NA_CDKN2AIP_TeperekTkacz201202_XENLA_00032461	PTHR16148	UNCHARACTERIZED	GO SLIM	GO:0003676	nucleic acid binding
Dnmt3l_DNMT3A_Audic201207_XENLA_00000064	-0.257525	1.95752	4.77067	0.0289486	0.43227	Dnmt3l_DNMT3A_Audic201207_XENLA_00000064	PTHR23068	DNA (CYTOSINE-5-)-METHYLTRANSFERASE 3-RELATED	GO SLIM	GO:0003676	nucleic acid binding
Scarb2_SCARB2_TC415309	0.223488	3.33656	4.76998	0.0289601	0.43227	Scarb2_SCARB2_TC415309	PTHR11923:SF13	LYSOSOME MEMBRANE PROTEIN 2	GO SLIM	GO:0004872	receptor activity
Nln_NLN_Ismailoglu201203_XENLA_00023410	-0.237811	2.61765	4.76989	0.0289617	0.43227	Nln_NLN_Ismailoglu201203_XENLA_00023410	PTHR11804	PROTEASE M3 THIMET OLIGOPEPTIDASE-RELATED	GO SLIM	GO:0016787	hydrolase activity
Cd81_CD81_Kwon201107_XENLA_00062484	0.203851	5.04137	4.76956	0.0289673	0.43227	Cd81_CD81_Kwon201107_XENLA_00062484	PTHR19282:SF19	CD81	GO SLIM	GO:0005515	protein binding
NA_NM_001086340.1	0.200827	5.83611	4.76376	0.029065	0.432763	NA_NM_001086340.1	PTHR11904	METHYLTHIOADENOSINE/PURINE NUCLEOSIDE PHOSPHORYLASE	GO SLIM	GO:0016740	transferase activity
Mrpl13_MRPL13_Kwon201107_XENLA_00117884	0.240221	2.8444	4.76305	0.029077	0.432763	Mrpl13_MRPL13_Kwon201107_XENLA_00117884	PTHR11545	RIBOSOMAL PROTEIN L13	GO SLIM	GO:0003735	structural constituent of ribosome
NA_KIF18B_XeXenL6RMv10026004m	-0.238073	2.72851	4.76264	0.0290839	0.432763	NA_KIF18B_XeXenL6RMv10026004m	PTHR24115	FAMILY NOT NAMED	GO SLIM	GO:0003777	microtubule motor activity
NA_XB-GENE-5937787_TeperekTkacz201206_XENLA_00058077	0.201749	5.319	4.762	0.0290947	0.432763	NA	NA	NA	NA	NA	NA
NA_BC046267.1	0.19884	5.84371	4.75731	0.0291741	0.433465	NA_BC046267.1	PTHR25069:SF79	SUBFAMILY NOT NAMED	GO SLIM	GO:0008092	cytoskeletal protein binding
Lig3_BC070993.1	0.20449	4.85038	4.75574	0.0292008	0.433465	Lig3_BC070993.1	PTHR10459	DNA LIGASE	GO SLIM	GO:0016874	ligase activity
NA_NM_001096277.1	0.277089	1.46359	4.75503	0.0292128	0.433465	NA_NM_001096277.1	PTHR12044:SF1	BCL2 INTERACTING MEDIATOR OF CELL DEATH (BIM)	GO SLIM	GO:0006915	apoptosis
NA_NM_001088518.1	-0.200002	5.74376	4.75246	0.0292564	0.433612	NA_NM_001088518.1	PTHR19134:SF48	RECEPTOR TYROSINE PHOSPHATASE TYPE R2A	GO SLIM	GO:0016787	hydrolase activity
NA_ZXDC_Taira201203_XENLA_stage_00183740	-0.220959	3.48118	4.75166	0.02927	0.433612	NA_ZXDC_Taira201203_XENLA_stage_00183740	PTHR19818	ZINC FINGER PROTEIN ZIC AND GLI	GO SLIM	GO:0003676	nucleic acid binding
Akap11_AKAP11_Kwon201107_XENLA_00078440	0.250068	2.11255	4.7412	0.0294485	0.435905	Akap11_AKAP11_Kwon201107_XENLA_00078440	PTHR10226	A KINASE ANCHOR PROTEIN	GO SLIM	GO:0005515	protein binding
Zfand4_ANUBL1_Taira201203_XENLA_tissue_00036858	0.206397	4.60553	4.73905	0.0294853	0.436097	Zfand4_ANUBL1_Taira201203_XENLA_tissue_00036858	PTHR10666	UBIQUITIN	GO SLIM	GO:0003735	structural constituent of ribosome
NA_NM_001094179.1	0.209386	4.1595	4.73519	0.0295515	0.436724	NA_NM_001094179.1	PTHR12111	CELL CYCLE CONTROL PROTEIN CWF16-RELATED	GO SLIM	GO:0031202	RNA splicing factor activity, transesterification mechanism
Cox4i1_COX4I1_TC425519	0.216057	3.74701	4.73253	0.0295973	0.436929	Cox4i1_COX4I1_TC425519	PTHR10707	CYTOCHROME C OXIDASE SUBUNIT IV	GO SLIM	GO:0016491	oxidoreductase activity
Hsf2_HSF2_Taira201203_XENLA_stage_00110529	0.205601	4.65268	4.73136	0.0296175	0.436929	Hsf2_HSF2_Taira201203_XENLA_stage_00110529	PTHR10015	HEAT SHOCK TRANSCRIPTION FACTOR	GO SLIM	GO:0003676	nucleic acid binding
NA_MYO5B_XeXenL6RMv10016104m	0.25767	2.33331	4.72769	0.0296808	0.436929	NA_MYO5B_XeXenL6RMv10016104m	PTHR13140:SF8	MYOSIN V	GO SLIM	GO:0003774	motor activity
NA_KEAP1_XeXenL6RMv10002348m	-0.249533	2.20578	4.72661	0.0296994	0.436929	NA	NA	NA	NA	NA	NA
NA_BC079821.1	-0.193197	9.62721	4.72644	0.0297024	0.436929	NA_BC079821.1	PTHR11636:SF16	POU DOMAIN CLASS 5 TRANSCRIPTION FACTOR 1	GO SLIM	GO:0003676	nucleic acid binding
NA_NA_Taira201203_XENLA_stage_00206267	-0.312225	0.88884	4.72527	0.0297225	0.436929	NA_NA_Taira201203_XENLA_stage_00206267	PTHR24377	FAMILY NOT NAMED	GO SLIM	GO:0003676	nucleic acid binding
Vma21_VMA21_Taira201203_XENLA_tissue_00184252	0.205925	4.62382	4.72351	0.029753	0.436929	NA	NA	NA	NA	NA	NA
NA_UBE2C_TeperekTkacz201206_XENLA_00044765	0.205239	4.72634	4.72334	0.029756	0.436929	NA_UBE2C_TeperekTkacz201206_XENLA_00044765	PTHR24067	UBIQUITIN-CONJUGATING ENZYME E2	GO SLIM	GO:0016874	ligase activity
NA_NM_001088969.1	0.228998	3.04601	4.72108	0.0297951	0.437154	NA_NM_001088969.1	PTHR22870:SF14	REGULATOR OF CHROMOSOME CONDENSATION-RELATED	GO SLIM	GO:0005083	small GTPase regulator activity
Adrb2_ADRB2_Taira201203_XENLA_tissue_00258486	0.235433	2.85132	4.71189	0.0299547	0.437818	Adrb2_ADRB2_Taira201203_XENLA_tissue_00258486	PTHR24248	ADRENERGIC RECEPTOR-RELATED G-PROTEIN COUPLED RECEPTOR	GO SLIM	GO:0004872	receptor activity
Mapre2_MAPRE2_mgEST_Xl4jul2012_1013253267	0.274421	1.49575	4.71185	0.0299554	0.437818	Mapre2_MAPRE2_mgEST_Xl4jul2012_1013253267	PTHR10623	MICROTUBULE-ASSOCIATED PROTEIN RP/EB FAMILY MEMBER	GO SLIM	GO:0008092	cytoskeletal protein binding
Churc1_CHURC1_Amin201106_XENLA_00035644	0.257831	2.01539	4.71146	0.0299622	0.437818	NA	NA	NA	NA	NA	NA
Pnkp_PNKP_Park201106_XENLA_00057938	0.235355	2.71667	4.70992	0.029989	0.437818	Pnkp_PNKP_Park201106_XENLA_00057938	PTHR12083	POLYNUCLEOTIDE KINASE- 3'-PHOSPHATASE	GO SLIM	GO:0016787	hydrolase activity
NA_NM_001094263.1	0.231769	2.72372	4.70837	0.0300161	0.437818	NA_NM_001094263.1	PTHR23233	ZINC FINGER PROTEIN	GO SLIM	GO:0003676	nucleic acid binding
Azi1_AZI1_Ismailoglu201203_XENLA_00021686	-0.194751	6.89887	4.7082	0.0300191	0.437818	NA	NA	NA	NA	NA	NA
NA_TANK_Ismailoglu201203_XENLA_00019987	-0.24213	2.3635	4.70719	0.0300366	0.437818	NA	NA	NA	NA	NA	NA
NA_TCIRG1_Taira201203_XENLA_stage_00041474	-0.225295	3.25001	4.70658	0.0300473	0.437818	NA_TCIRG1_Taira201203_XENLA_stage_00041474	PTHR11629:SF21	VACUOLAR PROTON TRANSLOCATING ATPASE 116 KDA SUBUNIT A ISOFORM 3	GO SLIM	GO:0022857	transmembrane transporter activity
NA_ARHGEF11_Taira201203_XENLA_stage_00026344	-0.208141	4.50162	4.70613	0.0300552	0.437818	NA_ARHGEF11_Taira201203_XENLA_stage_00026344	PTHR22825	RHO GUANINE EXCHANGE FACTOR	GO SLIM	GO:0005083	small GTPase regulator activity
NA_NM_001100938.1	0.205421	4.87398	4.70247	0.0301193	0.438142	NA	NA	NA	NA	NA	NA
Pdp1_NM_001094221.1	0.260142	2.33045	4.70213	0.0301253	0.438142	Pdp1_NM_001094221.1	PTHR13832:SF98	PYRUVATE DEHYDROGENASE [LIPOAMIDE]]-PHOSPHATASE 2, MITOCHONDRIAL	GO SLIM	GO:0019210	kinase inhibitor activity
Sept7_SEPT7_TeperekTkacz201206_XENLA_00087419	0.200434	5.37161	4.69454	0.0302586	0.439659	Sept7_SEPT7_TeperekTkacz201206_XENLA_00087419	PTHR18884	SEPTIN	GO SLIM	GO:0003924	GTPase activity
Gpr65_GPR65_Quigley201112_XENLA_00067836	0.243818	2.41196	4.69347	0.0302775	0.439659	NA	NA	NA	NA	NA	NA
NA_TMEM150B_Ismailoglu201203_XENLA_00070536	0.241527	2.55688	4.69162	0.03031	0.439783	NA	NA	NA	NA	NA	NA
NA_ATP1B1_Park201106_XENLA_00031877	0.249417	2.1543	4.68979	0.0303424	0.439905	NA_ATP1B1_Park201106_XENLA_00031877	PTHR11523:SF10	SODIUM/POTASSIUM-DEPENDENT ATPASE BETA-1 SUBUNIT	GO SLIM	GO:0022857	transmembrane transporter activity
NA_CERS2_Taira201203_XENLA_tissue_00205992	-0.238901	2.66044	4.6871	0.0303899	0.440245	NA_CERS2_Taira201203_XENLA_tissue_00205992	PTHR12560	LONGEVITY ASSURANCE FACTOR 1 (LAG1)	GO SLIM	GO:0006629	lipid metabolic process
NA_NM_001086878.1	-0.24423	2.42371	4.68295	0.0304634	0.440631	NA_NM_001086878.1	PTHR12610	SINGLE STRANDED DNA BINDING PROTEIN	GO SLIM	GO:0003676	nucleic acid binding
NA_PNHD_Taira201203_XENLA_stage_00105769	0.195779	6.82031	4.682	0.0304802	0.440631	NA	NA	NA	NA	NA	NA
NA_GM5805_TeperekTkacz201202_XENLA_00018785	0.202725	5.11967	4.68114	0.0304955	0.440631	NA_GM5805_TeperekTkacz201202_XENLA_00018785	PTHR11759	40S RIBOSOMAL PROTEIN S14/30S RIBOSOMAL PROTEIN S11	GO SLIM	GO:0003735	structural constituent of ribosome
Sypl_SYPL1_Taira201203_XENLA_tissue_00212019	0.221975	3.62479	4.67951	0.0305244	0.440631	Sypl_SYPL1_Taira201203_XENLA_tissue_00212019	PTHR10306	SYNAPTOPHYSIN	GO SLIM	GO:0006886	intracellular protein transport
NA_LRRFIP1_Taira201203_XENLA_stage_00212996	-0.221061	3.23239	4.67883	0.0305366	0.440631	NA_LRRFIP1_Taira201203_XENLA_stage_00212996	PTHR19212	LEUCINE RICH REPEAT (IN FLII) INTERACTING PROTEIN	GO SLIM	GO:0003676	nucleic acid binding
NA_NM_001096350.1	-0.194483	6.76224	4.6764	0.0305798	0.440907	NA	NA	NA	NA	NA	NA
Soat1_NM_001093559.1	0.198011	5.66822	4.67354	0.0306308	0.441295	Soat1_NM_001093559.1	PTHR10408	STEROL O-ACYLTRANSFERASE	GO SLIM	GO:0016740	transferase activity
NA_SEMA6D_Kwon201107_XENLA_00014789	-0.195626	6.2006	4.666	0.0307654	0.442887	NA_SEMA6D_Kwon201107_XENLA_00014789	PTHR11036	SEMAPHORIN	GO SLIM	GO:0005515	protein binding
NA_BC129744.1	0.207936	4.43947	4.66243	0.0308296	0.443463	NA_BC129744.1	PTHR15336	UBIQUINOL-CYTOCHROME C REDUCTASE COMPLEX 7.8 KDA PROTEIN	GO SLIM	GO:0016491	oxidoreductase activity
NA_NA_Taira201203_XENLA_stage_00003486	0.226843	3.01304	4.65868	0.0308969	0.444083	NA_NA_Taira201203_XENLA_stage_00003486	PTHR12019	LAMINA-ASSOCIATED POLYPEPTIDE (THYMOPOIETIN)	GO SLIM	GO:0005515	protein binding
NA_NM_001092456.1	-0.267055	1.82615	4.65124	0.0310311	0.445239	NA_NM_001092456.1	PTHR22825	RHO GUANINE EXCHANGE FACTOR	GO SLIM	GO:0005083	small GTPase regulator activity
NA_DCAF6_Horb201201_XENLA_00089614	-0.230417	2.72768	4.65049	0.0310447	0.445239	NA	NA	NA	NA	NA	NA
Amacr_AMACR_Taira201203_XENLA_stage_00207647	0.280396	1.36228	4.64957	0.0310613	0.445239	Amacr_AMACR_Taira201203_XENLA_stage_00207647	PTHR11837	ALPHA METHYLACYL-COA RACEMASE	GO SLIM	GO:0016854	racemase and epimerase activity
NA_ADCY9_TeperekTkacz201202_XENLA_00029581	0.248175	2.96706	4.6484	0.0310826	0.445239	NA_ADCY9_TeperekTkacz201202_XENLA_00029581	PTHR11920	ADENYLATE AND GUANYLATE CYCLASES	GO SLIM	GO:0016829	lyase activity
NA_APLNR_TC437685	0.198384	6.54939	4.6475	0.0310987	0.445239	NA	NA	NA	NA	NA	NA
NA_NM_001085907.1	0.211491	4.11774	4.64561	0.0311331	0.445383	NA_NM_001085907.1	PTHR10652	ADENYLYL CYCLASE-ASSOCIATED PROTEIN	GO SLIM	GO:0005198	structural molecule activity
NA_TAF15_Taira201203_XENLA_stage_00074189	-0.200291	5.0719	4.64294	0.0311815	0.445698	NA_TAF15_Taira201203_XENLA_stage_00074189	PTHR23238:SF5	TATA-BINDING PROTEIN ASSOCIATED FACTOR 2N (RNA-BINDING PROTEIN 56)	GO SLIM	GO:0003676	nucleic acid binding
Map1lc3b_NM_001095609.1	0.22683	3.03193	4.64172	0.0312037	0.445698	Map1lc3b_NM_001095609.1	PTHR10969	MICROTUBULE-ASSOCIATED PROTEINS 1A/1B LIGHT CHAIN 3-RELATED	GO SLIM	GO:0008092	cytoskeletal protein binding
Dhodh_BC071019.1	0.217247	3.44262	4.63347	0.0313541	0.447497	Dhodh_BC071019.1	PTHR11938	FAD NADPH DEHYDROGENASE/OXIDOREDUCTASE	GO SLIM	GO:0016491	oxidoreductase activity
NA_LRRC73_Ismailoglu201203_XENLA_00066591	-0.249646	2.00405	4.62471	0.0315146	0.449219	NA_LRRC73_Ismailoglu201203_XENLA_00066591	PTHR25480:SF34	SUBFAMILY NOT NAMED	GO SLIM	GO:0003676	nucleic acid binding
NA_TCF20_XeXenL6RMv10020443m	-0.211552	3.74175	4.62297	0.0315465	0.449219	NA_TCF20_XeXenL6RMv10020443m	PTHR14955	RETINOIC ACID INDUCED 1/TRANSCRIPTION FACTOR 20	GO SLIM	GO:0003676	nucleic acid binding
Paip1_NP_001090853.1_Taira201203_XENLA_stage_00139283	-0.206355	4.3461	4.62288	0.0315482	0.449219	Paip1_NP_001090853.1_Taira201203_XENLA_stage_00139283	PTHR23254	EIF4G DOMAIN PROTEIN	GO SLIM	GO:0003676	nucleic acid binding
Cd276_CD276_Taira201203_XENLA_tissue_00136536	0.231942	3.06978	4.6076	0.0318306	0.452888	NA	NA	NA	NA	NA	NA
NA_PLCL2_Taira201203_XENLA_stage_00148787	-0.268676	1.81417	4.60505	0.0318779	0.45321	NA_PLCL2_Taira201203_XENLA_stage_00148787	PTHR10336	PHOSPHOINOSITIDE-SPECIFIC PHOSPHOLIPASE C FAMILY PROTEIN	GO SLIM	GO:0016787	hydrolase activity
NA_SYNCRIPL_XeXenL6RMv10009826m	0.197512	5.58168	4.6033	0.0319104	0.453321	NA_SYNCRIPL_XeXenL6RMv10009826m	PTHR24012	FAMILY NOT NAMED	GO SLIM	GO:0003676	nucleic acid binding
NA_AB075972.1	0.260346	2.18734	4.59927	0.0319856	0.454037	NA	NA	NA	NA	NA	NA
Filip1_FILIP1_Taira201203_XENLA_stage_00085740	-0.21779	3.42959	4.59577	0.0320509	0.454405	NA	NA	NA	NA	NA	NA
NA_LRRFIP2_Taira201203_XENLA_tissue_00065220	-0.194509	6.12845	4.59523	0.0320611	0.454405	NA_LRRFIP2_Taira201203_XENLA_tissue_00065220	PTHR19212	LEUCINE RICH REPEAT (IN FLII) INTERACTING PROTEIN	GO SLIM	GO:0003676	nucleic acid binding
NA_BACH1_XeXenL6RMv10037259m	-0.244376	2.17464	4.59167	0.0321277	0.45466	NA_BACH1_XeXenL6RMv10037259m	PTHR24412:SF28	SUBFAMILY NOT NAMED	GO SLIM	GO:0008092	cytoskeletal protein binding
NA_RCAN1_Kwon201107_XENLA_00069644	-0.200345	4.79054	4.59162	0.0321286	0.45466	NA_RCAN1_Kwon201107_XENLA_00069644	PTHR10300:SF4	CALCIPRESSIN 1	GO SLIM	GO:0005515	protein binding
Cstf3_BC074269.1	-0.196393	5.50072	4.58903	0.0321773	0.45468	Cstf3_BC074269.1	PTHR19980	RNA CLEAVAGE STIMULATION FACTOR	GO SLIM	GO:0003676	nucleic acid binding
Lig4_LIG4_Taira201203_XENLA_stage_00191726	0.247759	2.1915	4.5889	0.0321796	0.45468	Lig4_LIG4_Taira201203_XENLA_stage_00191726	PTHR10459	DNA LIGASE	GO SLIM	GO:0016874	ligase activity
Prr11_PRR11_Taira201203_XENLA_stage_00103418	0.227331	2.9454	4.58534	0.0322466	0.455276	NA	NA	NA	NA	NA	NA
Cyth1_CYTH2_XeXenL6RMv10007951m	0.290127	1.13984	4.58341	0.0322829	0.455438	Cyth1_CYTH2_XeXenL6RMv10007951m	PTHR10663	GUANYL-NUCLEOTIDE EXCHANGE FACTOR	GO SLIM	GO:0005083	small GTPase regulator activity
NA_NP_001093736.1_Audic201207_XENLA_00006401	0.243426	2.20422	4.58053	0.0323373	0.455854	NA	NA	NA	NA	NA	NA
Runx1t1_NM_001095596.1	0.287682	1.17579	4.57793	0.0323863	0.456193	Runx1t1_NM_001095596.1	PTHR10379	MTG8(ETO)(EIGHT TWENTY ONE PROTEIN)	GO SLIM	GO:0003676	nucleic acid binding
NA_NM_001112743.1	0.239528	2.47915	4.57341	0.0324719	0.456582	NA_NM_001112743.1	PTHR12056	DNA-DIRECTED RNA POLYMERASES I, II, AND III	GO SLIM	GO:0003676	nucleic acid binding
Ube2w_UBE2W_Taira201203_XENLA_stage_00205184	0.235481	2.81665	4.57294	0.0324809	0.456582	Ube2w_UBE2W_Taira201203_XENLA_stage_00205184	PTHR24067	UBIQUITIN-CONJUGATING ENZYME E2	GO SLIM	GO:0016874	ligase activity
NA_TAF15_Ismailoglu201203_XENLA_00000641	-0.204112	4.40559	4.57191	0.0325003	0.456582	NA_TAF15_Ismailoglu201203_XENLA_00000641	PTHR23238:SF5	TATA-BINDING PROTEIN ASSOCIATED FACTOR 2N (RNA-BINDING PROTEIN 56)	GO SLIM	GO:0003676	nucleic acid binding
Nsun6_BC106345.1	-0.233006	2.61842	4.57122	0.0325134	0.456582	Nsun6_BC106345.1	PTHR22807	NOP2(YEAST)-RELATED NOL1/NOP2/FMU(SUN) DOMAIN-CONTAINING	GO SLIM	GO:0003676	nucleic acid binding
NA_S83518.1	-0.190227	8.30202	4.56385	0.0326536	0.45787	NA_S83518.1	PTHR11267	T-BOX PROTEIN-RELATED	GO SLIM	GO:0003676	nucleic acid binding
NA_TSC22D2_Ismailoglu201203_XENLA_00020024	-0.235474	2.55692	4.56377	0.0326551	0.45787	NA_TSC22D2_Ismailoglu201203_XENLA_00020024	PTHR12348	TSC22	GO SLIM	GO:0003676	nucleic acid binding
NA_NM_001086734.1	0.240773	2.39473	4.56002	0.0327268	0.45834	NA_NM_001086734.1	PTHR13887	GLUTATHIONE S-TRANSFERASE KAPPA	GO SLIM	GO:0019538	protein metabolic process
NA_EIF1B_Taira201203_XENLA_stage_00151110	0.190284	8.92844	4.55857	0.0327544	0.45834	NA	NA	NA	NA	NA	NA
NA_NM_001086719.1	0.213487	3.61809	4.55721	0.0327804	0.45834	NA_NM_001086719.1	PTHR11550	CTP SYNTHASE	GO SLIM	GO:0016874	ligase activity
NA_HPGD_TeperekTkacz201206_XENLA_00117768	0.265465	1.58955	4.55596	0.0328044	0.45834	NA	NA	NA	NA	NA	NA
Ankrd35_ANKRD35_Kwon201107_XENLA_00057384	-0.194158	6.05957	4.55548	0.0328136	0.45834	NA	NA	NA	NA	NA	NA
Adh5_NM_001092958.1	0.237589	2.67675	4.5457	0.0330014	0.46049	Adh5_NM_001092958.1	PTHR11695	ALCOHOL DEHYDROGENASE RELATED	GO SLIM	GO:0016491	oxidoreductase activity
Atf4_NM_001089743.1	-0.193387	6.40379	4.54486	0.0330177	0.46049	Atf4_NM_001089743.1	PTHR13044:SF2	CYCLIC AMP-DEPENDENT TRANSCRIPTION FACTOR ATF-4	GO SLIM	GO:0003676	nucleic acid binding
Spon2_SPON2_Kwon201107_XENLA_00089240	-0.261833	1.84044	4.54216	0.0330699	0.460772	Spon2_SPON2_Kwon201107_XENLA_00089240	PTHR11311:SF3	F-SPONDIN 2	GO SLIM	GO:0007398	ectoderm development
NA_ENC1.2_XeXenL6RMv10044893m	0.214341	3.64804	4.54121	0.0330882	0.460772	NA	NA	NA	NA	NA	NA
NA_MICAL3_Taira201203_XENLA_tissue_00049072	-0.214897	3.50985	4.53837	0.0331432	0.460845	NA	NA	NA	NA	NA	NA
NA_GAPDHS_TC457012	0.202857	4.75689	4.53834	0.0331437	0.460845	NA_GAPDHS_TC457012	PTHR10836	GLYCERALDEHYDE 3-PHOSPHATE DEHYDROGENASE	GO SLIM	GO:0016491	oxidoreductase activity
Cpm_CPM_Taira201203_XENLA_tissue_00041079	0.248009	2.10193	4.53526	0.0332034	0.4609	Cpm_CPM_Taira201203_XENLA_tissue_00041079	PTHR11532	PROTEASE M14 CARBOXYPEPTIDASE	GO SLIM	GO:0016787	hydrolase activity
NA_MRAS_Ismailoglu201203_XENLA_00054333	0.228003	3.03107	4.53473	0.0332138	0.4609	NA_MRAS_Ismailoglu201203_XENLA_00054333	PTHR24073	FAMILY NOT NAMED	GO SLIM	GO:0003924	GTPase activity
Slc6a8_NA_XeXenL6RMv10029603m	0.205549	4.52443	4.53425	0.033223	0.4609	Slc6a8_NA_XeXenL6RMv10029603m	PTHR11616	SODIUM/CHLORIDE DEPENDENT TRANSPORTER	GO SLIM	GO:0022857	transmembrane transporter activity
Phf20l1_NA_Quigley201207_XENLA_00006500	-0.19854	5.16204	4.52998	0.033306	0.461604	Phf20l1_NA_Quigley201207_XENLA_00006500	PTHR15856	PHD FINGER PROTEIN 20-RELATED	GO SLIM	GO:0003676	nucleic acid binding
Msgn1_NM_001090344.1	-0.207378	4.55687	4.52905	0.0333241	0.461604	NA	NA	NA	NA	NA	NA
NA_PRR12_Taira201203_XENLA_tissue_00215263	-0.259668	1.95134	4.52696	0.0333649	0.461758	NA	NA	NA	NA	NA	NA
Plekhn1_BC073066.1	0.190675	7.80635	4.52454	0.033412	0.461758	Plekhn1_BC073066.1	PTHR22826:SF7	GUANINE NUCLEOTIDE EXCHANGE FACTOR-RELATED	GO SLIM	GO:0005083	small GTPase regulator activity
Golga5_GOLGA5_Taira201203_XENLA_tissue_00253742	0.219051	3.13297	4.52224	0.033457	0.461758	NA	NA	NA	NA	NA	NA
BC021767_BC129515.1	-0.211716	3.75263	4.52134	0.0334746	0.461758	NA	NA	NA	NA	NA	NA
NA_SP5L_Ismailoglu201203_XENLA_00016609	-0.188903	9.08176	4.5212	0.0334774	0.461758	NA_SP5L_Ismailoglu201203_XENLA_00016609	PTHR23223	KRUEPPEL C2H2-TYPE ZINC-FINGER	GO SLIM	GO:0003676	nucleic acid binding
Rab8a_RAB8A_Kwon201107_XENLA_00059663	0.203204	4.32718	4.52015	0.033498	0.461758	Rab8a_RAB8A_Kwon201107_XENLA_00059663	PTHR24073	FAMILY NOT NAMED	GO SLIM	GO:0003924	GTPase activity
Sh2d3c_SH2D3C_Taira201203_XENLA_tissue_00145701	-0.275288	1.30603	4.51946	0.0335114	0.461758	Sh2d3c_SH2D3C_Taira201203_XENLA_tissue_00145701	PTHR14247:SF6	SUBFAMILY NOT NAMED	GO SLIM	GO:0007154	cell communication
Slc39a13_SLC39A13_TeperekTkacz201202_XENLA_00107983	0.23085	2.68831	4.518	0.0335401	0.461806	Slc39a13_SLC39A13_TeperekTkacz201202_XENLA_00107983	PTHR16950:SF6	SOLUTE CARRIER FAMILY 39 (ZINC TRANSPORTER), MEMBER 13	GO SLIM	GO:0022857	transmembrane transporter activity
NA_RPL10A_Taira201203_XENLA_stage_00022987	0.193886	5.96103	4.51463	0.0336061	0.462349	NA_RPL10A_Taira201203_XENLA_stage_00022987	PTHR23105	RIBOSOMAL PROTEIN L7AE FAMILY MEMBER	GO SLIM	GO:0003735	structural constituent of ribosome
Rbm38_RBM38_TeperekTkacz201206_XENLA_00010663	-0.205093	4.37705	4.51342	0.0336299	0.462349	Rbm38_RBM38_TeperekTkacz201206_XENLA_00010663	PTHR24011:SF25	SUBFAMILY NOT NAMED	GO SLIM	GO:0003676	nucleic acid binding
NA_SART1_Ismailoglu201203_XENLA_00049654	-0.286564	1.30668	4.50894	0.0337181	0.463147	NA_SART1_Ismailoglu201203_XENLA_00049654	PTHR14152	SQUAMOUS CELL CARCINOMA ANTIGEN RECOGNISED BY CYTOTOXIC T LYMPHOCYTES	GO SLIM	GO:0007155	cell adhesion
NA_SYAP1_Taira201203_XENLA_tissue_00211821	-0.193261	5.69674	4.50791	0.0337385	0.463147	NA_SYAP1_Taira201203_XENLA_tissue_00211821	PTHR16019	SYNAPSE-ASSOCIATED PROTEIN	GO SLIM	GO:0050877	neurological system process
NA_TPM1_Taira201203_XENLA_tissue_00228283	-0.19431	5.54074	4.50537	0.0337885	0.463487	NA	NA	NA	NA	NA	NA
Raver1-fdx1l_NM_001091519.1	0.199378	4.75574	4.50336	0.0338283	0.463685	Raver1-fdx1l_NM_001091519.1	PTHR23189:SF5	RAVER1	GO SLIM	GO:0031202	RNA splicing factor activity, transesterification mechanism
Clint1_CLINT1_Taira201203_XENLA_tissue_00188030	-0.208855	3.71199	4.50152	0.0338648	0.463839	Clint1_CLINT1_Taira201203_XENLA_tissue_00188030	PTHR12276	EPSIN/ENT-RELATED	GO SLIM	GO:0007242	intracellular signaling cascade
NA_NM_001092394.1	-0.239566	2.19845	4.4999	0.0338968	0.46393	NA_NM_001092394.1	PTHR24073:SF223	SUBFAMILY NOT NAMED	GO SLIM	GO:0003924	GTPase activity
NA_PPP1R14A_Taira201203_XENLA_stage_00158915	-0.204479	4.20305	4.4909	0.0340758	0.466033	NA_PPP1R14A_Taira201203_XENLA_stage_00158915	PTHR16188	PROTEIN PHOSPHATASE 1 INHIBITOR POTENTIATED BY PROTEIN KINASE C	GO SLIM	GO:0019208	phosphatase regulator activity
NA_NA_Quigley201207_XENLA_00011145	-0.21703	3.32245	4.48938	0.0341061	0.4661	NA	NA	NA	NA	NA	NA
NA_RAF1_XeXenL6RMv10022700m	-0.191628	6.23351	4.47635	0.0343671	0.467971	NA_RAF1_XeXenL6RMv10022700m	PTHR23257:SF42	C-RAF (RAF1)	GO SLIM	GO:0016740	transferase activity
NA_NA_Taira201203_XENLA_tissue_00187107	0.216427	3.60346	4.47548	0.0343846	0.467971	NA	NA	NA	NA	NA	NA
NA_NM_001091817.1	-0.204632	4.21278	4.4746	0.0344022	0.467971	NA	NA	NA	NA	NA	NA
NA_NM_001090381.1	0.275672	1.6956	4.47451	0.034404	0.467971	NA_NM_001090381.1	PTHR19134:SF48	RECEPTOR TYROSINE PHOSPHATASE TYPE R2A	GO SLIM	GO:0016787	hydrolase activity
NA_EIF5A_mgEST_Xl4jul2012_1013086606	0.193634	5.56089	4.47442	0.0344059	0.467971	NA_EIF5A_mgEST_Xl4jul2012_1013086606	PTHR11673	TRANSLATION INITIATION FACTOR 5A-RELATED	GO SLIM	GO:0045182	translation regulator activity
NA_NA_TC418732	-0.197715	4.9118	4.47402	0.0344139	0.467971	NA_NA_TC418732	PTHR21496	FERREDOXIN-RELATED	GO SLIM	GO:0016491	oxidoreductase activity
NA_MLL_Kwon201107_XENLA_00028273	0.213125	3.43766	4.47248	0.034445	0.467971	NA_MLL_Kwon201107_XENLA_00028273	PTHR26218:SF6	SUBFAMILY NOT NAMED	GO SLIM	GO:0003676	nucleic acid binding
NA_RNPEPL1_TC437690	-0.212585	3.48746	4.47111	0.0344726	0.467971	NA	NA	NA	NA	NA	NA
Msantd2_NA_Taira201203_XENLA_tissue_00269412	0.201145	4.4975	4.4711	0.0344728	0.467971	NA	NA	NA	NA	NA	NA
Dph2_DPH2_TC416284	0.203243	4.23424	4.46984	0.0344982	0.467971	Dph2_DPH2_TC416284	PTHR10762:SF2	DIPHTHAMIDE BIOSYNTHESIS PROTEIN 2 (DPH2 HOMOLOG)	GO SLIM	GO:0002376	immune system process
Dusp16_DUSP16_Taira201203_XENLA_tissue_00094295	-0.244785	2.08361	4.4659	0.0345779	0.468298	Dusp16_DUSP16_Taira201203_XENLA_tissue_00094295	PTHR10159	DUAL SPECIFICITY PROTEIN PHOSPHATASE	GO SLIM	GO:0016787	hydrolase activity
NA_NA_Kwon201107_XENLA_00054042	-0.252072	2.08281	4.46486	0.0345989	0.468298	NA_NA_Kwon201107_XENLA_00054042	PTHR24377	FAMILY NOT NAMED	GO SLIM	GO:0003676	nucleic acid binding
Ptk7_NM_001099913.1	-0.193511	5.69494	4.46476	0.0346009	0.468298	Ptk7_NM_001099913.1	PTHR24418	TYROSINE-PROTEIN KINASE	GO SLIM	GO:0016740	transferase activity
NA_WDR1_XeXenL6RMv10054038m	0.27106	1.64347	4.4636	0.0346245	0.468298	NA_WDR1_XeXenL6RMv10054038m	PTHR19856	WD-REPEATCONTAINING PROTEIN (WDR1)	GO SLIM	GO:0008092	cytoskeletal protein binding
NA_NA_Taira201203_XENLA_tissue_00021761	-0.220212	3.07853	4.46102	0.0346768	0.468661	NA_NA_Taira201203_XENLA_tissue_00021761	PTHR21552	ADULT RETINA PROTEIN	GO SLIM	GO:0050877	neurological system process
NA_ETV6_Taira201203_XENLA_stage_00184749	-0.216819	3.28253	4.45866	0.0347247	0.468962	NA_ETV6_Taira201203_XENLA_stage_00184749	PTHR11849:SF19	TEL	GO SLIM	GO:0003676	nucleic acid binding
NA_ARRB1_Taira201203_XENLA_tissue_00065952	-0.224219	2.96724	4.45605	0.0347778	0.469149	NA_ARRB1_Taira201203_XENLA_tissue_00065952	PTHR11792	ARRESTIN	GO SLIM	GO:0005515	protein binding
Tmem238_TMEM238_Taira201203_XENLA_tissue_00047788	-0.291367	1.20865	4.45447	0.0348101	0.469149	NA	NA	NA	NA	NA	NA
NA_NCKAP5L_Kwon201107_XENLA_00082726	-0.193255	5.67685	4.45384	0.0348229	0.469149	NA	NA	NA	NA	NA	NA
NA_RPLP0_Ismailoglu201203_XENLA_00057431	0.191273	6.43997	4.45296	0.0348408	0.469149	NA_RPLP0_Ismailoglu201203_XENLA_00057431	PTHR21141	60S ACIDIC RIBOSOMAL PROTEIN FAMILY MEMBER	GO SLIM	GO:0003735	structural constituent of ribosome
NA_BC080319.1	0.216299	3.50878	4.45014	0.0348983	0.469461	NA	NA	NA	NA	NA	NA
Atic_ATIC_TC418871	0.203794	4.50129	4.44932	0.0349152	0.469461	Atic_ATIC_TC418871	PTHR11692	BIFUNCTIONAL PURINE BIOSYNTHESIS PROTEIN	GO SLIM	GO:0016787	hydrolase activity
NA_NM_001093364.1	-0.227304	2.62032	4.44501	0.0350033	0.470301	NA_NM_001093364.1	PTHR14677	ARSENITE INDUCUBLE RNA ASSOCIATED PROTEIN AIP-1-RELATED	GO SLIM	GO:0003676	nucleic acid binding
NA_NA_Taira201203_XENLA_stage_00096762	-0.192072	5.76949	4.43576	0.0351936	0.472444	NA_NA_Taira201203_XENLA_stage_00096762	PTHR24408	FAMILY NOT NAMED	GO SLIM	GO:0003676	nucleic acid binding
NA_NM_001089777.1	-0.218927	3.29113	4.43475	0.0352143	0.472444	NA_NM_001089777.1	PTHR13693	CLASS II AMINOTRANSFERASE/8-AMINO-7-OXONONANOATE SYNTHASE	GO SLIM	GO:0016740	transferase activity
NA_MCRS1_Taira201203_XENLA_stage_00020688	0.207465	3.9117	4.43306	0.0352493	0.472568	NA	NA	NA	NA	NA	NA
NA_ATRN_TeperekTkacz201206_XENLA_00096418	-0.210913	3.81011	4.42961	0.0353205	0.473176	NA	NA	NA	NA	NA	NA
NA_NA_Ismailoglu201203_XENLA_00074675	0.188657	9.6493	4.42567	0.0354021	0.473792	NA_NA_Ismailoglu201203_XENLA_00074675	PTHR19964:SF24	PREDICTED: SIMILAR TO SJCHGC03982 PROTEIN	GO SLIM	GO:0005198	structural molecule activity
NA_ZSWIM5_Quigley201207_XENLA_00049177	0.219815	3.20061	4.42353	0.0354466	0.473792	NA	NA	NA	NA	NA	NA
Ccdc113_BC106507.1	-0.235174	2.43405	4.42262	0.0354655	0.473792	NA	NA	NA	NA	NA	NA
Stx19_NM_001094589.1	-0.188948	7.29505	4.42242	0.0354698	0.473792	Stx19_NM_001094589.1	PTHR19957:SF29	SYNTAXIN-RELATED	GO SLIM	GO:0005515	protein binding
NA_ZC3H18_Kwon201107_XENLA_00047819	-0.187686	7.5014	4.42037	0.0355124	0.473874	NA	NA	NA	NA	NA	NA
NA_BC071057.1	-0.219797	3.09276	4.41964	0.0355276	0.473874	NA_BC071057.1	PTHR23228	C2H2 ZINC FINGER	GO SLIM	GO:0003676	nucleic acid binding
Slc39a14_SLC39A14_Taira201203_XENLA_stage_00043477	-0.253179	1.99965	4.41483	0.0356279	0.474642	Slc39a14_SLC39A14_Taira201203_XENLA_stage_00043477	PTHR12191	SOLUTE CARRIER FAMILY 39	GO SLIM	GO:0022857	transmembrane transporter activity
Snrpe_SNRPE_Chung201110_XENLA_00040758	0.191185	6.26761	4.41308	0.0356645	0.474642	Snrpe_SNRPE_Chung201110_XENLA_00040758	PTHR11193	SMALL NUCLEAR RIBONUCLEOPROTEIN E	GO SLIM	GO:0031202	RNA splicing factor activity, transesterification mechanism
Mmp14_MMP14_Amin201106_XENLA_00082467	0.194766	5.95166	4.41131	0.0357015	0.474642	Mmp14_MMP14_Amin201106_XENLA_00082467	PTHR10201	MATRIX METALLOPROTEINASE	GO SLIM	GO:0016787	hydrolase activity
NA_PTK7_XeXenL6RMv10001413m	-0.201469	4.30485	4.41114	0.035705	0.474642	NA_PTK7_XeXenL6RMv10001413m	PTHR24418	TYROSINE-PROTEIN KINASE	GO SLIM	GO:0016740	transferase activity
Spry1_SPRY1_Kwon201107_XENLA_00049798	0.19648	4.94225	4.41068	0.0357146	0.474642	Spry1_SPRY1_Kwon201107_XENLA_00049798	PTHR12365	SPROUTY	GO SLIM	GO:0003676	nucleic acid binding
NA_SHB_Taira201203_XENLA_stage_00210532	0.263112	1.93228	4.40514	0.0358307	0.47584	NA	NA	NA	NA	NA	NA
NA_C11ORF96_TC431915	-0.233557	2.6586	4.40175	0.0359021	0.475927	NA	NA	NA	NA	NA	NA
NA_NA_Quigley201207_XENLA_00070182	0.275244	1.53891	4.40129	0.0359117	0.475927	NA_NA_Quigley201207_XENLA_00070182	PTHR11014	PEPTIDASE M20 FAMILY MEMBER	GO SLIM	GO:0016787	hydrolase activity
NA_TSPO_Taira201203_XENLA_tissue_00067110	0.218537	3.46411	4.40084	0.0359213	0.475927	NA_TSPO_Taira201203_XENLA_tissue_00067110	PTHR10057	PERIPHERAL-TYPE BENZODIAZEPINE RECEPTOR	GO SLIM	GO:0022857	transmembrane transporter activity
Lrrfip2_NM_001092352.1	-0.195701	5.11956	4.3999	0.035941	0.475927	Lrrfip2_NM_001092352.1	PTHR19212	LEUCINE RICH REPEAT (IN FLII) INTERACTING PROTEIN	GO SLIM	GO:0003676	nucleic acid binding
NA_NM_001094246.1	-0.211966	3.43613	4.39857	0.035969	0.475954	NA_NM_001094246.1	PTHR13556	TRANSCRIPTIONAL ADAPTER 3-RELATED	GO SLIM	GO:0003676	nucleic acid binding
Mutyh_MUTYH_Taira201203_XENLA_stage_00051705	-0.194276	5.13283	4.39563	0.0360312	0.476366	Mutyh_MUTYH_Taira201203_XENLA_stage_00051705	PTHR10359	A/G-SPECIFIC ADENINE GLYCOSYLASE/ENDONUCLEASE III	GO SLIM	GO:0016788	hydrolase activity, acting on ester bonds
NA_NM_001093142.1	-0.201349	4.14523	4.39457	0.0360536	0.476366	NA_NM_001093142.1	PTHR12552	OLIGOPHRENIN 1	GO SLIM	GO:0005083	small GTPase regulator activity
NA_M16259.1	0.194047	5.22751	4.39125	0.0361239	0.476366	NA_M16259.1	PTHR15184	ATP SYNTHASE	GO SLIM	GO:0022857	transmembrane transporter activity
Srprb_NM_001087377.1	-0.216305	3.26865	4.38842	0.0361839	0.476366	Srprb_NM_001087377.1	PTHR19326	SIGNAL RECOGNITION PARTICLE RECEPTOR BETA SUBUNIT RELATED	GO SLIM	GO:0004872	receptor activity
Nipa1_NIPA1_Ismailoglu201203_XENLA_00072385	-0.216354	3.11974	4.38753	0.0362026	0.476366	NA	NA	NA	NA	NA	NA
NA_TOMM7_Ismailoglu201203_XENLA_00031439	0.215736	3.39455	4.38704	0.0362131	0.476366	NA_TOMM7_Ismailoglu201203_XENLA_00031439	PTHR16463	TRANSLOCASE OF OUTER MEMBRANE SUBUNIT TOM7	GO SLIM	GO:0022857	transmembrane transporter activity
NA_WBP4_TeperekTkacz201206_XENLA_00100317	-0.190911	5.70794	4.38609	0.0362332	0.476366	NA	NA	NA	NA	NA	NA
NA_XB-GENE-5873315_TeperekTkacz201206_XENLA_00004236	0.238162	2.58865	4.38594	0.0362365	0.476366	NA_XB-GENE-5873315_TeperekTkacz201206_XENLA_00004236	PTHR24073	FAMILY NOT NAMED	GO SLIM	GO:0003924	GTPase activity
NA_BCR_Quigley201112_XENLA_00025339	0.267293	1.75919	4.38569	0.0362418	0.476366	NA_BCR_Quigley201112_XENLA_00025339	PTHR23182	BREAKPOINT CLUSTER REGION PROTEIN (BCR)	GO SLIM	GO:0005083	small GTPase regulator activity
Acvr1b_NM_001090880.1	-0.211943	3.45156	4.38411	0.0362755	0.476366	Acvr1b_NM_001090880.1	PTHR23255	TRANSFORMING GROWTH FACTOR-BETA RECEPTOR TYPE I AND II	GO SLIM	GO:0004675	transmembrane receptor protein serine/threonine kinase activity
NA_BIX1.2_TeperekTkacz201206_XENLA_00087088	0.284216	1.18987	4.38197	0.0363209	0.476366	NA	NA	NA	NA	NA	NA
Nlrx1_NLRX1_Kwon201107_XENLA_00095752	0.221286	3.14118	4.3809	0.0363439	0.476366	Nlrx1_NLRX1_Kwon201107_XENLA_00095752	PTHR24106:SF15	SUBFAMILY NOT NAMED	GO SLIM	GO:0006915	apoptosis
NA_KLHDC10_TeperekTkacz201202_XENLA_00141678	-0.205981	3.81685	4.37896	0.0363851	0.476366	NA	NA	NA	NA	NA	NA
NA_UNG_Ismailoglu201203_XENLA_00035822	0.197726	5.05185	4.37858	0.0363932	0.476366	NA_UNG_Ismailoglu201203_XENLA_00035822	PTHR11264	URACIL-DNA GLYCOSYLASE	GO SLIM	GO:0016787	hydrolase activity
NA_A9JTN1_XENTR_Ismailoglu201203_XENLA_00027820	-0.249598	2.04305	4.37804	0.0364049	0.476366	NA	NA	NA	NA	NA	NA
NA_ABCA1_Ismailoglu201203_XENLA_00052619	0.227398	2.78859	4.37753	0.0364158	0.476366	NA_ABCA1_Ismailoglu201203_XENLA_00052619	PTHR19229	ATP-BINDING CASSETTE TRANSPORTER SUBFAMILY A (ABCA)	GO SLIM	GO:0016787	hydrolase activity
NA_NA_Taira201203_XENLA_stage_00056404	-0.192423	5.34111	4.37335	0.0365051	0.476898	NA	NA	NA	NA	NA	NA
Rttn_RTTN_Kwon201107_XENLA_00109614	0.219444	2.92162	4.37209	0.0365323	0.476898	NA	NA	NA	NA	NA	NA
Epb4.1l1_EPB41L1_Taira201203_XENLA_stage_00003965	0.260721	2.5824	4.37198	0.0365344	0.476898	NA	NA	NA	NA	NA	NA
NA_BRPF1_TC462127	-0.247929	1.91235	4.36853	0.0366085	0.477361	NA_BRPF1_TC462127	PTHR13793	PHD FINGER PROTEINS	GO SLIM	GO:0003676	nucleic acid binding
NA_NM_001091166.1	-0.256491	1.75594	4.36791	0.036622	0.477361	NA_NM_001091166.1	PTHR10366	NAD DEPENDENT EPIMERASE/DEHYDRATASE	GO SLIM	GO:0016854	racemase and epimerase activity
Ndrg3_NM_001091958.1	0.209634	3.84873	4.36358	0.036715	0.478234	NA	NA	NA	NA	NA	NA
2310057M21Rik_C10ORF88_Taira201203_XENLA_tissue_00098874	0.20378	3.90109	4.36208	0.0367475	0.478317	NA	NA	NA	NA	NA	NA
NA_CLEC16A_TeperekTkacz201202_XENLA_00076033	-0.205057	3.72235	4.35758	0.0368446	0.478903	NA	NA	NA	NA	NA	NA
NA_SCARB1_XeXenL6RMv10014869m	0.261957	1.49936	4.35692	0.0368589	0.478903	NA_SCARB1_XeXenL6RMv10014869m	PTHR11923:SF11	SCAVENGER RECEPTOR CLASS B MEMBER 1	GO SLIM	GO:0004872	receptor activity
NA_HARS_Park201106_XENLA_00177823	0.219327	3.67542	4.35378	0.0369269	0.478903	NA_HARS_Park201106_XENLA_00177823	PTHR11476	HISTIDYL-TRNA SYNTHETASE	GO SLIM	GO:0016874	ligase activity
NA_TMEM72_Taira201203_XENLA_stage_00209864	0.251468	2.60018	4.35365	0.0369297	0.478903	NA	NA	NA	NA	NA	NA
Sp7_SP7_Kwon201107_XENLA_00074853	0.204175	3.98875	4.35117	0.0369835	0.478903	Sp7_SP7_Kwon201107_XENLA_00074853	PTHR23223	KRUEPPEL C2H2-TYPE ZINC-FINGER	GO SLIM	GO:0003676	nucleic acid binding
NA_BC070844.1	-0.189292	5.93053	4.35048	0.0369984	0.478903	NA_BC070844.1	PTHR13161	SPLICING FACTOR (SUPPRESSOR OF WHITE APRICOT)	GO SLIM	GO:0031202	RNA splicing factor activity, transesterification mechanism
C1galt1_C1GALT1_Taira201203_XENLA_tissue_00107249	-0.242258	2.39424	4.34962	0.0370172	0.478903	C1galt1_C1GALT1_Taira201203_XENLA_tissue_00107249	PTHR23033	BETA1,3-GALACTOSYLTRANSFERASE	GO SLIM	GO:0016740	transferase activity
NA_TUBB2C_TC420595	0.193242	5.39821	4.3492	0.0370263	0.478903	NA	NA	NA	NA	NA	NA
NA_N4BP3_Taira201203_XENLA_tissue_00273354	0.219399	3.13196	4.34915	0.0370275	0.478903	NA	NA	NA	NA	NA	NA
Llgl1_LLGL1_Taira201203_XENLA_stage_00132656	-0.18654	7.30219	4.34767	0.0370596	0.47898	Llgl1_LLGL1_Taira201203_XENLA_stage_00132656	PTHR10241	LETHAL(2) GIANT LARVAE PROTEIN	GO SLIM	GO:0007269	neurotransmitter secretion
NA_NM_001088989.1	0.202734	4.15207	4.3449	0.03712	0.479423	NA_NM_001088989.1	PTHR10127	DISCOIDIN, CUB, EGF, LAMININ , AND ZINC METALLOPROTEASE DOMAIN CONTAINING	GO SLIM	GO:0008237	metallopeptidase activity
NA_TAB3_XeXenL6RMv10028459m	-0.225144	2.69445	4.34075	0.0372104	0.479942	NA_TAB3_XeXenL6RMv10028459m	PTHR10351	TRANSCRIPTION FACTOR BTF3	GO SLIM	GO:0003676	nucleic acid binding
Ddrgk1_BC097868.1	-0.193727	5.33902	4.34018	0.037223	0.479942	NA	NA	NA	NA	NA	NA
Bcr_BCR_Taira201203_XENLA_stage_00156432	0.273823	1.93888	4.33939	0.0372402	0.479942	Bcr_BCR_Taira201203_XENLA_stage_00156432	PTHR23182	BREAKPOINT CLUSTER REGION PROTEIN (BCR)	GO SLIM	GO:0005083	small GTPase regulator activity
NA_NM_001190396.1	-0.219386	2.90025	4.338	0.0372707	0.479942	NA_NM_001190396.1	PTHR13713	SIALYLTRANSFERASE	GO SLIM	GO:0016740	transferase activity
NA_ARHGEF40_Taira201203_XENLA_tissue_00144294	0.23555	2.32671	4.33707	0.037291	0.479942	NA_ARHGEF40_Taira201203_XENLA_tissue_00144294	PTHR22826:SF52	RHO GUANINE NUCLEOTIDE EXCHANGE FACTOR RELATED	GO SLIM	GO:0005083	small GTPase regulator activity
Bend3_BEND3_XeXenL6RMv10006352m	0.239007	2.12241	4.32998	0.0374467	0.48153	NA	NA	NA	NA	NA	NA
NA_BCR_Taira201203_XENLA_stage_00194471	0.249999	1.91115	4.32906	0.037467	0.48153	NA_BCR_Taira201203_XENLA_stage_00194471	PTHR23182	BREAKPOINT CLUSTER REGION PROTEIN (BCR)	GO SLIM	GO:0005083	small GTPase regulator activity
Rad51ap1_RAD51AP1_Kwon201107_XENLA_00001988	0.19616	4.70042	4.3252	0.037552	0.481664	Rad51ap1_RAD51AP1_Kwon201107_XENLA_00001988	PTHR15361:SF2	RAD51-INTERACTING PROTEIN	GO SLIM	GO:0006139	nucleobase, nucleoside, nucleotide and nucleic acid metabolic process
NA_SCLT1_XeXenL6RMv10048573m	-0.244389	1.96881	4.32467	0.0375638	0.481664	NA	NA	NA	NA	NA	NA
Rps6kb1_BC078067.1	0.191834	5.21607	4.32453	0.0375668	0.481664	NA	NA	NA	NA	NA	NA
Tbc1d23_TBC1D23_Ismailoglu201203_XENLA_00001447	-0.210621	3.34167	4.32382	0.0375824	0.481664	NA	NA	NA	NA	NA	NA
NA_B3GALT6_Quigley201112_XENLA_00026983	-0.248003	1.98344	4.32239	0.0376141	0.481734	NA_B3GALT6_Quigley201112_XENLA_00026983	PTHR11214:SF10	BETA-1,3-GALACTOSYLTRANSFERASE-6	GO SLIM	GO:0016740	transferase activity
Sys1_NM_001085953.1	0.212323	3.39742	4.3176	0.0377201	0.482755	Sys1_NM_001085953.1	PTHR12952	SYS1	GO SLIM	GO:0022857	transmembrane transporter activity
NA_SEC23IP_Ismailoglu201203_XENLA_00042810	-0.188255	6.05412	4.31037	0.0378808	0.484261	NA_SEC23IP_Ismailoglu201203_XENLA_00042810	PTHR15457:SF8	SEC-23 INTERACTING PROTEIN P125	GO SLIM	GO:0016787	hydrolase activity
Wipf2_WIPF2_Taira201203_XENLA_tissue_00192011	-0.20015	4.29327	4.30992	0.0378906	0.484261	NA	NA	NA	NA	NA	NA
NA_NA_Taira201203_XENLA_stage_00053260	0.275617	1.28869	4.30837	0.0379252	0.484366	NA	NA	NA	NA	NA	NA
NA_NUDT19_Kwon201107_XENLA_00033345	0.265479	1.35052	4.30289	0.0380476	0.485233	NA	NA	NA	NA	NA	NA
Larp4_LARP4_Taira201203_XENLA_tissue_00282358	-0.203207	3.89751	4.29984	0.038116	0.485233	NA	NA	NA	NA	NA	NA
NA_LLGL1_Taira201203_XENLA_tissue_00003482	-0.187297	6.35499	4.29959	0.0381215	0.485233	NA_LLGL1_Taira201203_XENLA_tissue_00003482	PTHR10241	LETHAL(2) GIANT LARVAE PROTEIN	GO SLIM	GO:0007269	neurotransmitter secretion
Cinp_CINP_Kwon201107_XENLA_00038636	0.191057	5.48779	4.29914	0.0381316	0.485233	NA	NA	NA	NA	NA	NA
NA_PTTG1IP.2_Taira201203_XENLA_tissue_00097279	0.212868	3.36294	4.29838	0.0381488	0.485233	NA	NA	NA	NA	NA	NA
NA_NM_001086901.1	0.199811	4.32452	4.29824	0.0381519	0.485233	NA_NM_001086901.1	PTHR11406	PHOSPHOGLYCERATE KINASE	GO SLIM	GO:0019200	carbohydrate kinase activity
NA_BC074258.1	-0.260646	1.59819	4.29545	0.0382145	0.485693	NA_BC074258.1	PTHR19959	KINESIN LIGHT CHAIN	GO SLIM	GO:0005200	structural constituent of cytoskeleton
NA_USP19_TeperekTkacz201202_XENLA_00062878	-0.201754	3.9596	4.29412	0.0382443	0.485735	NA_USP19_TeperekTkacz201202_XENLA_00062878	PTHR24006:SF73	SUBFAMILY NOT NAMED	GO SLIM	GO:0016787	hydrolase activity
Tradd_TRADD_Taira201203_XENLA_tissue_00163023	-0.228786	2.61034	4.28748	0.0383941	0.486178	NA	NA	NA	NA	NA	NA
Sptbn1_NP_001120103.1_Kwon201107_XENLA_00131492	-0.185942	6.90502	4.28703	0.0384041	0.486178	Sptbn1_NP_001120103.1_Kwon201107_XENLA_00131492	PTHR25069:SF79	SUBFAMILY NOT NAMED	GO SLIM	GO:0008092	cytoskeletal protein binding
NA_NA_TC440517	-0.196414	4.64337	4.28591	0.0384296	0.486178	NA	NA	NA	NA	NA	NA
NA_EIF2B1_Taira201203_XENLA_stage_00188709	-0.258758	1.52	4.28469	0.038457	0.486178	NA_EIF2B1_Taira201203_XENLA_stage_00188709	PTHR10233	TRANSLATION INITIATION FACTOR EIF-2B	GO SLIM	GO:0016853	isomerase activity
Eif4enif1_EIF4ENIF1_Taira201203_XENLA_stage_00055632	-0.18469	7.57538	4.28422	0.0384678	0.486178	NA	NA	NA	NA	NA	NA
NA_AP2A1_mgEST_Xl4jul2012_1013098942	-0.211976	3.18882	4.28413	0.0384697	0.486178	NA_AP2A1_mgEST_Xl4jul2012_1013098942	PTHR22780	ADAPTIN, ALPHA/GAMMA/EPSILON	GO SLIM	GO:0016192	vesicle-mediated transport
NA_RFWD2_Kwon201107_XENLA_00018605	-0.209893	3.3524	4.28334	0.0384877	0.486178	NA_RFWD2_Kwon201107_XENLA_00018605	PTHR22847:SF14	UBIQUITIN LIGASE PROTEIN COP1 (CONSTITUTIVE PHOTOMORPHOGENESIS PROTEIN 1) (HCOP1)	GO SLIM	GO:0016874	ligase activity
NA_TMEM238_Quigley201207_XENLA_00066142	0.240457	2.38733	4.28318	0.0384913	0.486178	NA	NA	NA	NA	NA	NA
R3hdm4_R3HDM4_Audic201207_XENLA_00003367	0.253439	1.7265	4.28004	0.0385623	0.486681	NA	NA	NA	NA	NA	NA
Kbtbd3_KBTBD3_Ismailoglu201203_XENLA_00061009	-0.230146	2.32893	4.27771	0.0386153	0.486681	Kbtbd3_KBTBD3_Ismailoglu201203_XENLA_00061009	PTHR24412:SF101	SUBFAMILY NOT NAMED	GO SLIM	GO:0008092	cytoskeletal protein binding
Got2_BC056110.1	0.20107	4.5935	4.27678	0.0386364	0.486681	Got2_BC056110.1	PTHR11879	ASPARTATE AMINOTRANSFERASE	GO SLIM	GO:0008483	transaminase activity
Cstf3_CSTF3_TC415200	-0.189458	5.48885	4.27674	0.0386373	0.486681	Cstf3_CSTF3_TC415200	PTHR19980	RNA CLEAVAGE STIMULATION FACTOR	GO SLIM	GO:0003676	nucleic acid binding
NA_TNRC18_Taira201203_XENLA_tissue_00186426	-0.200929	3.90162	4.27439	0.0386908	0.487021	NA_TNRC18_Taira201203_XENLA_tissue_00186426	PTHR12505	PHD FINGER TRANSCRIPTION FACTOR	GO SLIM	GO:0003676	nucleic acid binding
Keap1_NM_001095480.1	-0.232575	2.35561	4.27304	0.0387216	0.487075	NA	NA	NA	NA	NA	NA
Slc35a1_NM_001096552.1	-0.230039	2.78508	4.2685	0.0388251	0.487794	Slc35a1_NM_001096552.1	PTHR10231	NUCLEOTIDE-SUGAR TRANSMEMBRANE TRANSPORTER	GO SLIM	GO:0022857	transmembrane transporter activity
Ppp2r3a_NA_Taira201203_XENLA_stage_00009770	0.228152	2.41302	4.26704	0.0388585	0.487794	Ppp2r3a_NA_Taira201203_XENLA_stage_00009770	PTHR14095	PHOSPHATASE 2A REGULATORY SUBUNIT-RELATED	GO SLIM	GO:0016787	hydrolase activity
Gm2061_SLC30A10_Taira201203_XENLA_tissue_00269763	0.217074	3.28332	4.26598	0.0388828	0.487794	Gm2061_SLC30A10_Taira201203_XENLA_tissue_00269763	PTHR11562	CATION EFFLUX PROTEIN/ ZINC TRANSPORTER	GO SLIM	GO:0022857	transmembrane transporter activity
Tdh_TDH_Taira201203_XENLA_tissue_00068075	-0.201054	4.05413	4.26259	0.0389604	0.487794	Tdh_TDH_Taira201203_XENLA_tissue_00068075	PTHR10366	NAD DEPENDENT EPIMERASE/DEHYDRATASE	GO SLIM	GO:0016854	racemase and epimerase activity
NA_BC072267.1	-0.21892	2.93545	4.26248	0.0389629	0.487794	NA	NA	NA	NA	NA	NA
Luc7l2_NM_001086744.1	0.190541	5.68036	4.2615	0.0389854	0.487794	NA	NA	NA	NA	NA	NA
NA_LRP1_Taira201203_XENLA_tissue_00288384	-0.186742	6.26259	4.26143	0.0389871	0.487794	NA_LRP1_Taira201203_XENLA_tissue_00288384	PTHR10529:SF100	PROLOW-DENSITY LIPOPROTEIN RECEPTOR-RELATED PROTEIN 1	GO SLIM	GO:0004872	receptor activity
NA_PPP6R1_Taira201203_XENLA_stage_00062822	-0.219893	2.81621	4.2587	0.0390499	0.487794	NA_PPP6R1_Taira201203_XENLA_stage_00062822	PTHR12634	SIT4(YEAST)-ASSOCIATING PROTEIN-RELATED	GO SLIM	GO:0019208	phosphatase regulator activity
Ccng1_CCNG1_XeXenL6RMv10009072m	0.188703	7.96366	4.25737	0.0390804	0.487794	Ccng1_CCNG1_XeXenL6RMv10009072m	PTHR10177	CYCLINE	GO SLIM	GO:0005515	protein binding
NA_SEMA6C_XeXenL6RMv10027329m	0.21567	3.48358	4.25575	0.0391176	0.487794	NA_SEMA6C_XeXenL6RMv10027329m	PTHR11036	SEMAPHORIN	GO SLIM	GO:0005515	protein binding
AU040320_KIAA0319L_Taira201203_XENLA_tissue_00111357	-0.191156	5.04247	4.25547	0.039124	0.487794	AU040320_KIAA0319L_Taira201203_XENLA_tissue_00111357	PTHR10083:SF14	UNCHARACTERIZED	GO SLIM	GO:0004867	serine-type endopeptidase inhibitor activity
Brap_NM_001090983.1	-0.21808	2.89297	4.25381	0.0391625	0.487794	Brap_NM_001090983.1	PTHR24007	FAMILY NOT NAMED	GO SLIM	GO:0016874	ligase activity
NA_NM_001088619.1	-0.222652	2.69362	4.25272	0.0391875	0.487794	NA_NM_001088619.1	PTHR24012	FAMILY NOT NAMED	GO SLIM	GO:0003676	nucleic acid binding
NA_BC077266.1	-0.23599	2.29294	4.25265	0.039189	0.487794	NA_BC077266.1	PTHR24089:SF84	SUBFAMILY NOT NAMED	GO SLIM	GO:0006812	cation transport
NA_ADD3_XeXenL6RMv10027739m	-0.200155	4.33772	4.25237	0.0391955	0.487794	NA_ADD3_XeXenL6RMv10027739m	PTHR10672:SF5	GAMMA ADDUCIN	GO SLIM	GO:0008092	cytoskeletal protein binding
Hnrnpd_HNRNPD_Ismailoglu201203_XENLA_00074366	-0.205508	3.64126	4.25199	0.0392044	0.487794	Hnrnpd_HNRNPD_Ismailoglu201203_XENLA_00074366	PTHR24012	FAMILY NOT NAMED	GO SLIM	GO:0003676	nucleic acid binding
NA_NM_001086687.1	0.185059	7.01752	4.2393	0.0394985	0.491121	NA_NM_001086687.1	PTHR13509	SEC61BETA-PROV PROTEIN	GO SLIM	GO:0016874	ligase activity
NA_NM_001093271.1	0.214353	3.05833	4.23665	0.0395601	0.491552	NA	NA	NA	NA	NA	NA
NA_ZNF282_Kwon201107_XENLA_00002411	0.261301	1.40123	4.23113	0.0396891	0.492645	NA_ZNF282_Kwon201107_XENLA_00002411	PTHR24377	FAMILY NOT NAMED	GO SLIM	GO:0003676	nucleic acid binding
NA_NA_Taira201203_XENLA_stage_00102654	-0.240795	2.07793	4.23059	0.0397017	0.492645	NA_NA_Taira201203_XENLA_stage_00102654	PTHR19300	BETA-1,4-GALACTOSYLTRANSFERASE	GO SLIM	GO:0016740	transferase activity
Paf1_PAF1_TeperekTkacz201202_XENLA_00129522	-0.1859	6.35938	4.22918	0.0397347	0.492721	NA	NA	NA	NA	NA	NA
NA_TRIM36_Taira201203_XENLA_tissue_00290119	0.193973	4.54644	4.22795	0.0397635	0.492745	NA_TRIM36_Taira201203_XENLA_tissue_00290119	PTHR24103:SF68	SUBFAMILY NOT NAMED	GO SLIM	GO:0016874	ligase activity
Usb1_C16ORF57_Taira201203_XENLA_tissue_00066510	0.193924	4.59921	4.22675	0.0397916	0.49276	NA	NA	NA	NA	NA	NA
NA_PKDCC.2_Taira201203_XENLA_tissue_00136372	0.230053	2.42378	4.22134	0.0399187	0.494	NA_PKDCC.2_Taira201203_XENLA_tissue_00136372	PTHR23257:SF101	SUBFAMILY NOT NAMED	GO SLIM	GO:0016740	transferase activity
NA_BC074401.1	-0.1859	6.3514	4.21237	0.0401303	0.494969	NA_BC074401.1	PTHR24418	TYROSINE-PROTEIN KINASE	GO SLIM	GO:0016740	transferase activity
NA_BC085040.1	-0.214976	2.96888	4.21204	0.040138	0.494969	NA	NA	NA	NA	NA	NA
Spry2_SPRY2_TeperekTkacz201206_XENLA_00065011	0.190112	5.37533	4.21186	0.0401422	0.494969	Spry2_SPRY2_TeperekTkacz201206_XENLA_00065011	PTHR12365	SPROUTY	GO SLIM	GO:0003676	nucleic acid binding
Klhl5_KLHL5_XeXenL6RMv10007172m	-0.26601	1.42006	4.21161	0.0401483	0.494969	NA	NA	NA	NA	NA	NA
Map3k19_NA_Quigley201207_XENLA_00089389	0.293223	0.818997	4.21134	0.0401547	0.494969	NA	NA	NA	NA	NA	NA
NA_ZNF704_Kwon201107_XENLA_00106608	-0.228011	2.52238	4.20847	0.0402225	0.494969	NA_ZNF704_Kwon201107_XENLA_00106608	PTHR13006	PAPILLOMAVIRUS REGULATORY FACTOR PRF-1	GO SLIM	GO:0003676	nucleic acid binding
NA_ISCU_Kwon201107_XENLA_00093565	0.188027	5.99432	4.20769	0.040241	0.494969	NA_ISCU_Kwon201107_XENLA_00093565	PTHR10093	IRON-SULFUR CLUSTER ASSEMBLY ENZYME (NIFU HOMOLOG)	GO SLIM	GO:0006732	coenzyme metabolic process
NA_PTPRF_Taira201203_XENLA_stage_00052529	-0.183942	6.86502	4.20575	0.0402871	0.494969	NA_PTPRF_Taira201203_XENLA_stage_00052529	PTHR19134:SF48	RECEPTOR TYROSINE PHOSPHATASE TYPE R2A	GO SLIM	GO:0016787	hydrolase activity
NA_ARHGEF5_Park201106_XENLA_00113341	-0.214644	2.98608	4.20567	0.040289	0.494969	NA	NA	NA	NA	NA	NA
Sec14l1_SEC14L5_Kwon201107_XENLA_00068535	0.202513	3.75012	4.20555	0.0402918	0.494969	Sec14l1_SEC14L5_Kwon201107_XENLA_00068535	PTHR23324:SF8	SEC14 RELATED PROTEIN	GO SLIM	GO:0006886	intracellular protein transport
NA_ANKRD35_Taira201203_XENLA_tissue_00139349	-0.18743	5.74694	4.20547	0.0402938	0.494969	NA	NA	NA	NA	NA	NA
Elavl2_ELAVL2_TeperekTkacz201206_XENLA_00076489	-0.224103	2.56363	4.20366	0.0403368	0.495165	Elavl2_ELAVL2_TeperekTkacz201206_XENLA_00076489	PTHR24011:SF55	SUBFAMILY NOT NAMED	GO SLIM	GO:0003676	nucleic acid binding
NA_ZFYVE16_XeXenL6RMv10050956m	0.247014	1.74893	4.20192	0.0403783	0.495343	NA_ZFYVE16_XeXenL6RMv10050956m	PTHR22835:SF43	ZINC FINGER FYVE DOMAIN CONTAINING PROTEIN 16	GO SLIM	GO:0005515	protein binding
Trmu_TRMU_Taira201203_XENLA_tissue_00036204	-0.243122	2.06574	4.19578	0.0405246	0.496689	Trmu_TRMU_Taira201203_XENLA_tissue_00036204	PTHR11933	TRNA (5-METHYLAMINOMETHYL-2-THIOURIDYLATE)-METHYLTRANSFERASE	GO SLIM	GO:0003676	nucleic acid binding
Ccdc37_CCDC37_Quigley201207_XENLA_00006512	0.25081	1.9083	4.19429	0.0405602	0.496689	NA	NA	NA	NA	NA	NA
NA_NA_TeperekTkacz201202_XENLA_00050602	0.233519	2.13356	4.1918	0.0406199	0.496689	NA	NA	NA	NA	NA	NA
NA_COX6A1_TeperekTkacz201206_XENLA_00038399	0.186957	5.74772	4.1917	0.0406223	0.496689	NA_COX6A1_TeperekTkacz201206_XENLA_00038399	PTHR11504	CYTOCHROME C OXIDASE POLYPEPTIDE VIA	GO SLIM	GO:0016491	oxidoreductase activity
NA_A8KBE1_XENTR_XeXenL6RMv10013069m	-0.19152	5.00495	4.19166	0.0406234	0.496689	NA_A8KBE1_XENTR_XeXenL6RMv10013069m	PTHR10676	DYNEIN HEAVY CHAIN FAMILY PROTEIN	GO SLIM	GO:0016787	hydrolase activity
Nadsyn1_NP_001120406.1_XeXenL6RMv10007105m	-0.219348	2.70092	4.19007	0.0406613	0.496821	Nadsyn1_NP_001120406.1_XeXenL6RMv10007105m	PTHR23090	NH(3)/GLUTAMINE-DEPENDENT NAD(+) SYNTHETASE	GO SLIM	GO:0016874	ligase activity
NA_FGFR2_XeXenL6RMv10045165m	0.189656	5.50367	4.1886	0.0406966	0.496921	NA_FGFR2_XeXenL6RMv10045165m	PTHR24416	TYROSINE-PROTEIN KINASE RECEPTOR	GO SLIM	GO:0016740	transferase activity
NA_NEDD1_Taira201203_XENLA_stage_00146181	0.203665	4.00058	4.18746	0.0407241	0.496927	NA_NEDD1_Taira201203_XENLA_stage_00146181	PTHR22847:SF11	NEURAL CELL EXPRESSED, DEVELOPMENTALLY DOWN-REGULATED GENE 1 (NEDD1)	GO SLIM	GO:0007398	ectoderm development
NA_ZFYVE16_Park201106_XENLA_00170757	0.253947	1.50601	4.1856	0.0407688	0.497141	NA_ZFYVE16_Park201106_XENLA_00170757	PTHR22835:SF43	ZINC FINGER FYVE DOMAIN CONTAINING PROTEIN 16	GO SLIM	GO:0005515	protein binding
Rpl21_NM_001092290.1	0.20287	3.8566	4.18208	0.0408534	0.497842	Rpl21_NM_001092290.1	PTHR20981	60S RIBOSOMAL PROTEIN L21	GO SLIM	GO:0003735	structural constituent of ribosome
NA_EHD3_Quigley201112_XENLA_00042151	-0.207052	3.47987	4.17849	0.0409403	0.498569	NA_EHD3_Quigley201112_XENLA_00042151	PTHR11216:SF31	EH DOMAIN CONTAINING/PAST 1, 2, 3	GO SLIM	GO:0005509	calcium ion binding
NA_NM_001096820.1	0.200189	3.89012	4.17585	0.0410039	0.499012	NA	NA	NA	NA	NA	NA
Ccdc66_CCDC66_Kwon201107_XENLA_00011808	-0.202464	3.60178	4.17203	0.0410964	0.499807	NA	NA	NA	NA	NA	NA
NA_ALMS1_Kwon201107_XENLA_00074666	0.232982	2.25711	4.16879	0.0411752	0.500266	NA	NA	NA	NA	NA	NA
NA_KIF16B_TeperekTkacz201202_XENLA_00146937	-0.226551	2.33149	4.16823	0.0411887	0.500266	NA_KIF16B_TeperekTkacz201202_XENLA_00146937	PTHR24115	FAMILY NOT NAMED	GO SLIM	GO:0003777	microtubule motor activity
Tubb5_TUBB_mgEST_Xl4jul2012_1013254044	0.18662	5.86978	4.16233	0.0413326	0.501118	NA	NA	NA	NA	NA	NA
NA_TTC13_Taira201203_XENLA_stage_00044704	-0.198457	4.0727	4.16205	0.0413394	0.501118	NA_TTC13_Taira201203_XENLA_stage_00044704	PTHR23083	TETRATRICOPEPTIDE REPEAT PROTEIN, TPR	GO SLIM	GO:0016740	transferase activity
Eif2c4_EIF2C4_XeXenL6RMv10006325m	0.190171	4.93365	4.16162	0.0413497	0.501118	Eif2c4_EIF2C4_XeXenL6RMv10006325m	PTHR22891	EUKARYOTIC TRANSLATION INITIATION FACTOR 2C	GO SLIM	GO:0045182	translation regulator activity
Tmf1_NM_001097682.1	-0.190037	4.8658	4.1603	0.041382	0.501118	NA	NA	NA	NA	NA	NA
Hapln3_HAPLN3_TC415680	0.271372	1.57855	4.15975	0.0413955	0.501118	Hapln3_HAPLN3_TC415680	PTHR22804	AGGRECAN/VERSICAN PROTEOGLYCAN	GO SLIM	GO:0031012	extracellular matrix
NA_DEDD2_TC414102	0.256056	1.80006	4.15616	0.0414833	0.501332	NA	NA	NA	NA	NA	NA
NA_NA_Taira201203_XENLA_stage_00008069	-0.185257	6.20893	4.15587	0.0414905	0.501332	NA	NA	NA	NA	NA	NA
NA_FAM171A1_Kwon201107_XENLA_00003758	-0.191246	4.7366	4.15568	0.0414952	0.501332	NA	NA	NA	NA	NA	NA
NA_NP_001120164.1_Taira201203_XENLA_tissue_00218523	-0.226308	2.50158	4.15289	0.0415635	0.501754	NA_NP_001120164.1_Taira201203_XENLA_tissue_00218523	PTHR24377	FAMILY NOT NAMED	GO SLIM	GO:0003676	nucleic acid binding
Elp3_ELP3_Taira201203_XENLA_stage_00002467	-0.186368	5.6375	4.15202	0.0415849	0.501754	Elp3_ELP3_Taira201203_XENLA_stage_00002467	PTHR11135	HISTONE ACETYLTRANSFERASE-RELATED	GO SLIM	GO:0016740	transferase activity
NA_SMARCC1_XeXenL6RMv10051394m	-0.205331	4.01148	4.14996	0.0416355	0.502035	NA_SMARCC1_XeXenL6RMv10051394m	PTHR12802	SWI/SNF COMPLEX-RELATED	GO SLIM	GO:0003676	nucleic acid binding
Mtif2_F6ZVR3_XENTR_XeXenL6RMv10046737m	-0.217526	2.73137	4.1472	0.0417033	0.502522	Mtif2_F6ZVR3_XENTR_XeXenL6RMv10046737m	PTHR23115:SF41	TRANSLATION INITIATION FACTOR IF-2	GO SLIM	GO:0016787	hydrolase activity
Abl1_ABL1_XeXenL6RMv10024230m	0.213606	3.05313	4.14522	0.0417523	0.502582	Abl1_ABL1_XeXenL6RMv10024230m	PTHR24418	TYROSINE-PROTEIN KINASE	GO SLIM	GO:0016740	transferase activity
Usp22_NA_Ismailoglu201203_XENLA_00005139	-0.184344	6.15684	4.14478	0.041763	0.502582	Usp22_NA_Ismailoglu201203_XENLA_00005139	PTHR24006:SF57	SUBFAMILY NOT NAMED	GO SLIM	GO:0016787	hydrolase activity
Polr2e_NM_001090047.1	0.18666	5.69331	4.14127	0.0418498	0.503296	Polr2e_NM_001090047.1	PTHR10535	FAMILY NOT NAMED	GO SLIM	GO:0003676	nucleic acid binding
NA_CDC42BPB_Audic201207_XENLA_00002472	0.213281	2.94846	4.13827	0.0419239	0.503856	NA_CDC42BPB_Audic201207_XENLA_00002472	PTHR22988	MYOTONIC DYSTROPHY S/T KINASE-RELATED	GO SLIM	GO:0016740	transferase activity
NA_FAM171A1_Taira201203_XENLA_tissue_00242005	-0.193167	4.46529	4.13673	0.0419621	0.503985	NA	NA	NA	NA	NA	NA
Helz_HELZ_Ismailoglu201203_XENLA_00021276	-0.182019	7.04089	4.13171	0.0420867	0.505098	Helz_HELZ_Ismailoglu201203_XENLA_00021276	PTHR10887	DNA2/NAM7 HELICASE FAMILY	GO SLIM	GO:0016787	hydrolase activity
NA_RPS16_Taira201203_XENLA_stage_00061255	0.184895	6.00092	4.12992	0.0421314	0.505098	NA_RPS16_Taira201203_XENLA_stage_00061255	PTHR21569	RIBOSOMAL PROTEIN S9	GO SLIM	GO:0003735	structural constituent of ribosome
NA_GM5805_Taira201203_XENLA_stage_00044571	0.186555	5.73316	4.12968	0.0421374	0.505098	NA_GM5805_Taira201203_XENLA_stage_00044571	PTHR11759	40S RIBOSOMAL PROTEIN S14/30S RIBOSOMAL PROTEIN S11	GO SLIM	GO:0003735	structural constituent of ribosome
NA_LUC7L2_Taira201203_XENLA_stage_00037265	0.185882	5.968	4.12838	0.0421696	0.505154	NA	NA	NA	NA	NA	NA
NA_NM_001093126.1	0.188341	5.19403	4.1266	0.042214	0.505356	NA_NM_001093126.1	PTHR10634	AN1-TYPE ZINC FINGER PROTEIN	GO SLIM	GO:0022904	respiratory electron transport chain
Dlx6_DLX6_Ismailoglu201203_XENLA_00030441	0.219632	2.82714	4.125	0.0422541	0.505505	Dlx6_DLX6_Ismailoglu201203_XENLA_00030441	PTHR24327	FAMILY NOT NAMED	GO SLIM	GO:0003676	nucleic acid binding
NA_DQ096880.1	0.222751	2.86746	4.12122	0.0423484	0.50593	NA	NA	NA	NA	NA	NA
Coq10a_COQ10A_Quigley201207_XENLA_00096393	-0.241443	2.00833	4.12071	0.0423614	0.50593	Coq10a_COQ10A_Quigley201207_XENLA_00096393	PTHR12901	SPERM PROTEIN HOMOLOG	GO SLIM	GO:0003824	catalytic activity
NA_FZD2_Quigley201207_XENLA_00078350	0.196967	4.17768	4.12027	0.0423724	0.50593	NA	NA	NA	NA	NA	NA
NA_PKDCC.1_mgEST_Xl4jul2012_1013102658	0.22137	2.73627	4.11711	0.0424516	0.506547	NA_PKDCC.1_mgEST_Xl4jul2012_1013102658	PTHR23257:SF101	SUBFAMILY NOT NAMED	GO SLIM	GO:0016740	transferase activity
Grina_NA_Taira201203_XENLA_tissue_00140007	-0.196687	4.1658	4.11443	0.0425188	0.506975	Grina_NA_Taira201203_XENLA_tissue_00140007	PTHR23291:SF16	NMDA RECEPTOR GLUTAMATE-BINDING CHAIN	GO SLIM	GO:0004872	receptor activity
Rbl1_RBL1_Audic201207_XENLA_00007667	0.183283	6.25216	4.11214	0.0425765	0.506975	Rbl1_RBL1_Audic201207_XENLA_00007667	PTHR13742:SF9	RETINOBLASTOMA-LIKE PROTEIN 1 (107 KDA RETINOBLASTOMA-ASSOCIATED PROTEIN) (P107)	GO SLIM	GO:0003676	nucleic acid binding
Pgd_PGD_Taira201203_XENLA_tissue_00111543	0.200065	3.6997	4.11211	0.0425772	0.506975	Pgd_PGD_Taira201203_XENLA_tissue_00111543	PTHR11811	6-PHOSPHOGLUCONATE DEHYDROGENASE	GO SLIM	GO:0016491	oxidoreductase activity
Slx1b_BC082532.1	-0.194214	4.35486	4.1104	0.0426203	0.506975	Slx1b_BC082532.1	PTHR20208	FAMILY NOT NAMED	GO SLIM	GO:0016787	hydrolase activity
NA_UGCG_Quigley201207_XENLA_00105047	0.193994	4.3317	4.11019	0.0426257	0.506975	NA_UGCG_Quigley201207_XENLA_00105047	PTHR12726	CERAMIDE GLUCOSYLTRANSFERASE	GO SLIM	GO:0016740	transferase activity
Acsl4_ACSL4_Kwon201107_XENLA_00012165	0.18272	6.53958	4.10616	0.0427272	0.507622	Acsl4_ACSL4_Kwon201107_XENLA_00012165	PTHR24096	FAMILY NOT NAMED	GO SLIM	GO:0008152	metabolic process
NA_SPRY1_Taira201203_XENLA_stage_00026796	0.191551	4.68917	4.10583	0.0427355	0.507622	NA_SPRY1_Taira201203_XENLA_stage_00026796	PTHR12365	SPROUTY	GO SLIM	GO:0003676	nucleic acid binding
NA_BC130041.1	-0.196401	4.18851	4.10396	0.0427829	0.507855	NA_BC130041.1	PTHR13289	PROTEIN PHOSPHATASE 1-BINDING PROTEIN BIFOCAL	GO SLIM	GO:0005198	structural molecule activity
Amer1_FAM123B_Taira201203_XENLA_stage_00109544	0.182373	6.64873	4.10287	0.0428105	0.507855	NA	NA	NA	NA	NA	NA
Nudcd2_HMMR_Kwon201107_XENLA_00001171	-0.180173	8.32987	4.10106	0.0428564	0.508072	Nudcd2_HMMR_Kwon201107_XENLA_00001171	PTHR12356	NUCLEAR MOVEMENT PROTEIN NUDC	GO SLIM	GO:0005198	structural molecule activity
NA_FST_TC424338	0.215758	3.40225	4.0992	0.0429035	0.508133	NA	NA	NA	NA	NA	NA
Chst2_NM_001127775.1	0.201786	3.66095	4.09867	0.042917	0.508133	Chst2_NM_001127775.1	PTHR10704	CARBOHYDRATE SULFOTRANSFERASE	GO SLIM	GO:0016740	transferase activity
NA_NA_Kwon201107_XENLA_00098296	-0.189046	4.87581	4.09523	0.0430043	0.508621	NA_NA_Kwon201107_XENLA_00098296	PTHR14326	TARGETING PROTEIN FOR XKLP2	GO SLIM	GO:0008092	cytoskeletal protein binding
NA_CBY1_TeperekTkacz201206_XENLA_00084543	0.201903	3.63606	4.09486	0.0430137	0.508621	NA	NA	NA	NA	NA	NA
C1qtnf4_NM_001094101.1	-0.278394	1.20981	4.09272	0.0430682	0.508938	NA	NA	NA	NA	NA	NA
Sdf2l1_SDF2L1_Taira201203_XENLA_tissue_00079401	0.185201	5.71798	4.09055	0.0431237	0.509265	Sdf2l1_SDF2L1_Taira201203_XENLA_tissue_00079401	PTHR10050	DOLICHYL-PHOSPHATE-MANNOSE--PROTEIN MANNOSYLTRANSFERASE	GO SLIM	GO:0016740	transferase activity
NA_NM_001090719.1	0.186351	5.24135	4.08852	0.0431753	0.509547	NA_NM_001090719.1	PTHR10822	GLYPICAN	GO SLIM	GO:0007155	cell adhesion
NA_NM_001088507.1	0.245367	2.30505	4.08627	0.0432329	0.509898	NA	NA	NA	NA	NA	NA
NA_ZNF653_XeXenL6RMv10044266m	-0.2056	3.5733	4.07983	0.0433979	0.511516	NA_ZNF653_XeXenL6RMv10044266m	PTHR11389	ZINC FINGER PROTEIN	GO SLIM	GO:0003676	nucleic acid binding
NA_RBBP6_TeperekTkacz201206_XENLA_00101813	-0.222065	2.50086	4.07862	0.0434292	0.511555	NA_RBBP6_TeperekTkacz201206_XENLA_00101813	PTHR15439	RETINOBLASTOMA-BINDING PROTEIN 6	GO SLIM	GO:0016787	hydrolase activity
Bhlhe22_BHLHE22_Taira201203_XENLA_stage_00061742	0.241416	2.25889	4.07562	0.0435062	0.512095	Bhlhe22_BHLHE22_Taira201203_XENLA_stage_00061742	PTHR19290	BASIC HELIX-LOOP-HELIX PROTEIN NEUROGENIN-RELATED	GO SLIM	GO:0003676	nucleic acid binding
Tpte_TPTE2_Taira201203_XENLA_stage_00142454	0.213384	3.12456	4.07467	0.0435309	0.512095	Tpte_TPTE2_Taira201203_XENLA_stage_00142454	PTHR12305:SF13	TPIP	GO SLIM	GO:0016787	hydrolase activity
NA_TMEM161B_Taira201203_XENLA_stage_00045167	-0.23932	2.00833	4.06942	0.0436662	0.512991	NA	NA	NA	NA	NA	NA
NA_IRF5_TeperekTkacz201206_XENLA_00072539	0.212942	3.39533	4.06905	0.0436759	0.512991	NA_IRF5_TeperekTkacz201206_XENLA_00072539	PTHR11949	INTERFERON REGULATORY FACTOR	GO SLIM	GO:0003676	nucleic acid binding
NA_ZFP36_XeXenL6RMv10040123m	-0.260593	1.3988	4.06847	0.0436909	0.512991	NA_ZFP36_XeXenL6RMv10040123m	PTHR12547	CCCH ZINC FINGER/TIS11-RELATED	GO SLIM	GO:0003676	nucleic acid binding
Wrap53_WRAP53_Taira201203_XENLA_stage_00199455	-0.190415	4.92856	4.0615	0.0438715	0.514304	NA	NA	NA	NA	NA	NA
NA_PTPN2_Taira201203_XENLA_tissue_00150432	-0.186936	4.9903	4.06139	0.0438744	0.514304	NA_PTPN2_Taira201203_XENLA_tissue_00150432	PTHR19134:SF57	PROTEIN TYROSINE PHOSPHATASE, NON-RECEPTOR TYPE NT1	GO SLIM	GO:0016787	hydrolase activity
NA_ALDH3B1_TeperekTkacz201202_XENLA_00088317	-0.183216	5.85935	4.05898	0.0439371	0.514304	NA_ALDH3B1_TeperekTkacz201202_XENLA_00088317	PTHR11699:SF15	ALDEHYDE DEHYDROGENASE	GO SLIM	GO:0016491	oxidoreductase activity
Xrn1_XRN1_Ismailoglu201203_XENLA_00022302	-0.179537	8.17181	4.058	0.0439626	0.514304	Xrn1_XRN1_Ismailoglu201203_XENLA_00022302	PTHR12341	5'->3' EXORIBONUCLEASE	GO SLIM	GO:0016787	hydrolase activity
NA_BC153803.1	0.200563	3.81582	4.05629	0.044007	0.514304	NA_BC153803.1	PTHR23138:SF8	RAN-BINDING PROTEIN 2	GO SLIM	GO:0005083	small GTPase regulator activity
NA_NM_001087293.1	-0.22395	2.43303	4.05453	0.044053	0.514304	NA_NM_001087293.1	PTHR24073	FAMILY NOT NAMED	GO SLIM	GO:0003924	GTPase activity
NA_SERPINH1_Ismailoglu201203_XENLA_00012712	-0.187926	5.19005	4.05278	0.0440988	0.514304	NA_SERPINH1_Ismailoglu201203_XENLA_00012712	PTHR11461	SERINE PROTEASE INHIBITOR, SERPIN	GO SLIM	GO:0004867	serine-type endopeptidase inhibitor activity
NA_FUBP3_Quigley201207_XENLA_00107686	0.204262	3.90595	4.05277	0.044099	0.514304	NA_FUBP3_Quigley201207_XENLA_00107686	PTHR10288	KH DOMAIN CONTAINING RNA BINDING PROTEIN	GO SLIM	GO:0031202	RNA splicing factor activity, transesterification mechanism
Haus2_NM_001091726.1	0.234398	2.1084	4.05242	0.044108	0.514304	NA	NA	NA	NA	NA	NA
NA_EIF2C2_XeXenL6RMv10049078m	0.213319	2.80682	4.05037	0.0441617	0.514304	NA_EIF2C2_XeXenL6RMv10049078m	PTHR22891	EUKARYOTIC TRANSLATION INITIATION FACTOR 2C	GO SLIM	GO:0045182	translation regulator activity
NA_NA_Taira201203_XENLA_tissue_00105483	-0.217302	3.16887	4.04965	0.0441806	0.514304	NA_NA_Taira201203_XENLA_tissue_00105483	PTHR24103:SF74	SUBFAMILY NOT NAMED	GO SLIM	GO:0016874	ligase activity
Nphp1_NM_001091731.1	-0.183767	5.64772	4.04947	0.0441853	0.514304	Nphp1_NM_001091731.1	PTHR15176	NEPHROCYSTIN	GO SLIM	GO:0007154	cell communication
Mdm1_MDM1_XeXenL6RMv10013054m	-0.20609	3.16462	4.04734	0.0442411	0.514304	NA	NA	NA	NA	NA	NA
NA_NM_001136168.1	-0.179868	7.25552	4.04714	0.0442463	0.514304	NA_NM_001136168.1	PTHR12346	SIN3B-RELATED	GO SLIM	GO:0003676	nucleic acid binding
NA_BC055969.1	-0.195755	3.8841	4.04604	0.0442751	0.514304	NA_BC055969.1	PTHR10972	OXYSTEROL-BINDING PROTEIN-RELATED	GO SLIM	GO:0006629	lipid metabolic process
NA_TRIL_Taira201203_XENLA_stage_00073019	0.193487	4.56338	4.04603	0.0442753	0.514304	NA_TRIL_Taira201203_XENLA_stage_00073019	PTHR24367	LEUCINE-RICH REPEAT-CONTAINING PROTEIN	GO SLIM	GO:0004872	receptor activity
NA_ANKRD28_XeXenL6RMv10037511m	-0.186934	5.08496	4.04587	0.0442795	0.514304	NA	NA	NA	NA	NA	NA
F2rl1_NM_001095470.1	0.188965	4.67215	4.04273	0.0443621	0.514938	NA	NA	NA	NA	NA	NA
NA_CYP2R1_Kwon201107_XENLA_00125484	0.257809	1.71379	4.03703	0.0445121	0.516235	NA	NA	NA	NA	NA	NA
NA_LRIG3_Taira201203_XENLA_stage_00165144	0.180582	6.83909	4.03507	0.0445639	0.516235	NA_LRIG3_Taira201203_XENLA_stage_00165144	PTHR24369	FAMILY NOT NAMED	GO SLIM	GO:0004872	receptor activity
Rnf111_NM_001094155.1	0.182006	6.19223	4.03503	0.044565	0.516235	Rnf111_NM_001094155.1	PTHR13644	ARKADIA-RELATED	GO SLIM	GO:0007498	mesoderm development
NA_H1F0_TC441782	0.209385	2.9716	4.03368	0.0446007	0.516235	NA_H1F0_TC441782	PTHR11467	HISTONE H1/H5	GO SLIM	GO:0003676	nucleic acid binding
Notum_NOTUM_Taira201203_XENLA_stage_00135205	0.200012	3.98634	4.03182	0.0446497	0.516235	Notum_NOTUM_Taira201203_XENLA_stage_00135205	PTHR21562	NOTUM-RELATED	GO SLIM	GO:0016787	hydrolase activity
NA_IL17RD_TeperekTkacz201202_XENLA_00047069	-0.201341	3.54904	4.0314	0.044661	0.516235	NA	NA	NA	NA	NA	NA
NA_NM_001096460.1	-0.188963	4.63625	4.03029	0.0446903	0.516235	NA_NM_001096460.1	PTHR12673:SF11	FARP1 PROTEIN	GO SLIM	GO:0005083	small GTPase regulator activity
Polr3a_POLR3A_Taira201203_XENLA_stage_00087171	-0.219328	2.49951	4.02853	0.044737	0.516235	Polr3a_POLR3A_Taira201203_XENLA_stage_00087171	PTHR19376	DNA-DIRECTED RNA POLYMERASE	GO SLIM	GO:0003676	nucleic acid binding
Tmem127_TMEM127_XeXenL6RMv10055114m	0.185055	5.60971	4.02645	0.044792	0.516235	NA	NA	NA	NA	NA	NA
NA_BC068652.1	-0.211311	2.89129	4.02488	0.0448339	0.516235	NA_BC068652.1	PTHR24073:SF223	SUBFAMILY NOT NAMED	GO SLIM	GO:0003924	GTPase activity
Fau_NM_001096142.1	0.188511	5.09477	4.02441	0.0448462	0.516235	NA	NA	NA	NA	NA	NA
NA_UEVLD_XeXenL6RMv10047858m	-0.258637	1.35741	4.02354	0.0448694	0.516235	NA_UEVLD_XeXenL6RMv10047858m	PTHR23306:SF5	UBIQUITIN-CONJUGATING ENZYME VARIANT-RELATED	GO SLIM	GO:0016874	ligase activity
NA_NP_001135521.1_XeXenL6RMv10009027m	-0.2027	3.3375	4.02348	0.044871	0.516235	NA	NA	NA	NA	NA	NA
Calr_NM_001086627.1	-0.178973	8.088	4.02314	0.0448801	0.516235	Calr_NM_001086627.1	PTHR11073	CALRETICULIN AND CALNEXIN	GO SLIM	GO:0005509	calcium ion binding
NA_PLXNA1_TC446153	-0.185714	5.07193	4.02237	0.0449006	0.516235	NA_PLXNA1_TC446153	PTHR22625:SF13	PLEXIN A1, 2, 3	GO SLIM	GO:0016740	transferase activity
Smarcad1_SMARCAD1_Taira201203_XENLA_tissue_00040729	0.192339	4.46266	4.02148	0.0449243	0.516235	Smarcad1_SMARCAD1_Taira201203_XENLA_tissue_00040729	PTHR10799	SWI/SNF-RELATED MATRIX-ASSOCIATED ACTIN-DEPENDENT REGULATOR OF CHROMATIN SUBFAMILY-RELATED	GO SLIM	GO:0003678	DNA helicase activity
NA_NM_001090597.1	-0.187707	4.84204	4.01812	0.0450139	0.516448	NA_NM_001090597.1	PTHR24418	TYROSINE-PROTEIN KINASE	GO SLIM	GO:0016740	transferase activity
NA_XB-GENE-5874358_Kwon201107_XENLA_00094954	0.18675	4.97378	4.01771	0.0450247	0.516448	NA_XB-GENE-5874358_Kwon201107_XENLA_00094954	PTHR10177	CYCLINE	GO SLIM	GO:0005515	protein binding
NA_TRIL_Taira201203_XENLA_stage_00128312	0.193948	4.43195	4.01727	0.0450366	0.516448	NA_TRIL_Taira201203_XENLA_stage_00128312	PTHR24367	LEUCINE-RICH REPEAT-CONTAINING PROTEIN	GO SLIM	GO:0004872	receptor activity
NA_MTMR1_Taira201203_XENLA_tissue_00233854	-0.201547	3.4718	4.0163	0.0450625	0.516448	NA_MTMR1_Taira201203_XENLA_tissue_00233854	PTHR10807	MYOTUBULARIN-RELATED	GO SLIM	GO:0006629	lipid metabolic process
NA_FBXL19_TeperekTkacz201206_XENLA_00004060	-0.188679	4.6194	4.01551	0.0450836	0.516448	NA_FBXL19_TeperekTkacz201206_XENLA_00004060	PTHR23123	PHD/F-BOX CONTAINING PROTEIN	GO SLIM	GO:0019538	protein metabolic process
NA_PNHD_Taira201203_XENLA_stage_00103003	0.182348	6.10009	4.0104	0.0452205	0.517693	NA	NA	NA	NA	NA	NA
NA_GM9104_Taira201203_XENLA_stage_00011202	0.188385	4.84545	4.00868	0.0452665	0.517713	NA_GM9104_Taira201203_XENLA_stage_00011202	PTHR20981	60S RIBOSOMAL PROTEIN L21	GO SLIM	GO:0003735	structural constituent of ribosome
Kctd18_NM_001095275.1	-0.195445	3.93773	4.00707	0.0453099	0.517713	Kctd18_NM_001095275.1	PTHR14499:SF4	BTB/POZ DOMAIN-CONTAINING PROTEIN KCTD18	GO SLIM	GO:0005515	protein binding
Haus4_HAUS4_Kwon201107_XENLA_00078346	0.248515	1.64706	4.00509	0.0453629	0.517713	NA	NA	NA	NA	NA	NA
NA_TMEM111_Taira201203_XENLA_stage_00184345	0.19353	4.23902	4.00488	0.0453687	0.517713	NA	NA	NA	NA	NA	NA
Elmod2_ELMOD2_Kwon201107_XENLA_00048943	0.227542	2.42478	4.00443	0.0453808	0.517713	Elmod2_ELMOD2_Kwon201107_XENLA_00048943	PTHR12771	ENGULFMENT AND CELL MOTILITY	GO SLIM	GO:0005515	protein binding
Wdr36_NM_001086229.1	0.196059	3.93955	4.00403	0.0453917	0.517713	Wdr36_NM_001086229.1	PTHR13889:SF2	WD-REPEAT PROTEIN 36 (T-CELL ACTIVATION WD REPEAT PROTEIN)	GO SLIM	GO:0031202	RNA splicing factor activity, transesterification mechanism
NA_NA_Taira201203_XENLA_stage_00045981	0.189513	4.44586	4.00212	0.0454431	0.517792	NA	NA	NA	NA	NA	NA
NA_CTAGE5_Taira201203_XENLA_tissue_00009577	-0.182092	5.7712	4.00022	0.0454944	0.517792	NA	NA	NA	NA	NA	NA
Twsg1_TWSG1_Park201106_XENLA_00151591	-0.212641	2.81301	4.00005	0.0454988	0.517792	NA	NA	NA	NA	NA	NA
D10Wsu52e_C22ORF28_Ismailoglu201203_XENLA_00066335	0.202268	4.14159	3.99854	0.0455396	0.517792	NA	NA	NA	NA	NA	NA
NA_ENPP2_Kwon201107_XENLA_00040964	0.235421	2.36628	3.99724	0.0455748	0.517792	NA_ENPP2_Kwon201107_XENLA_00040964	PTHR10151:SF21	ECTONUCLEOTIDE PYROPHOSPHATASE/PHOSPHODIESTERASE FAMILY MEMBER 2	GO SLIM	GO:0016787	hydrolase activity
Zfp143_NM_001090904.1	-0.243212	1.85482	3.99677	0.0455874	0.517792	Zfp143_NM_001090904.1	PTHR11389	ZINC FINGER PROTEIN	GO SLIM	GO:0003676	nucleic acid binding
NA_BC072188.1	0.189392	4.58833	3.99645	0.0455961	0.517792	NA	NA	NA	NA	NA	NA
NA_DDX11_TeperekTkacz201202_XENLA_00067254	-0.222572	2.35923	3.99238	0.0457065	0.517811	NA_DDX11_TeperekTkacz201202_XENLA_00067254	PTHR11472	DNA REPAIR DEAD HELICASE RAD3/XP-D SUBFAMILY MEMBER	GO SLIM	GO:0003678	DNA helicase activity
Pgm2_PGM1_Taira201203_XENLA_stage_00186328	0.184471	5.19849	3.99158	0.0457281	0.517811	Pgm2_PGM1_Taira201203_XENLA_stage_00186328	PTHR22573	PHOSPHOHEXOMUTASE FAMILY MEMBER	GO SLIM	GO:0003824	catalytic activity
LOC100503180_ACACA_XeXenL6RMv10013343m	0.275708	1.02746	3.99058	0.0457554	0.517811	LOC100503180_ACACA_XeXenL6RMv10013343m	PTHR18866	CARBOXYLASE:PYRUVATE/ACETYL-COA/PROPIONYL-COA CARBOXYLASE	GO SLIM	GO:0016874	ligase activity
Lrrc16a_LRRC16A_XeXenL6RMv10018424m	-0.210724	2.94114	3.98986	0.0457748	0.517811	NA	NA	NA	NA	NA	NA
NA_ANKRD10_Park201106_XENLA_00012721	0.237206	2.26808	3.98952	0.045784	0.517811	NA	NA	NA	NA	NA	NA
D930015E06Rik_KIAA0922_Kwon201107_XENLA_00035856	0.206385	3.52258	3.98844	0.0458134	0.517811	NA	NA	NA	NA	NA	NA
NA_MFSD10_XeXenL6RMv10041531m	-0.238621	1.91526	3.98776	0.0458321	0.517811	NA_MFSD10_XeXenL6RMv10041531m	PTHR24003	MAJOR FACILITATOR SUPERFAMILY DOMAIN-CONTAINING PROTEIN-RELATED	GO SLIM	GO:0022857	transmembrane transporter activity
NA_BC169867.1	-0.18053	6.31981	3.9862	0.0458743	0.517811	NA_BC169867.1	PTHR24418	TYROSINE-PROTEIN KINASE	GO SLIM	GO:0016740	transferase activity
NA_BC076859.1	-0.183501	5.36527	3.98467	0.0459161	0.517811	NA_BC076859.1	PTHR13847:SF41	SUBFAMILY NOT NAMED	GO SLIM	GO:0016491	oxidoreductase activity
Ccdc130_CCDC130_Taira201203_XENLA_stage_00203166	-0.234255	2.19848	3.98378	0.0459404	0.517811	Ccdc130_CCDC130_Taira201203_XENLA_stage_00203166	PTHR12111	CELL CYCLE CONTROL PROTEIN CWF16-RELATED	GO SLIM	GO:0031202	RNA splicing factor activity, transesterification mechanism
Prune_PRUNE_XeXenL6RMv10051150m	-0.220673	2.42128	3.98331	0.0459532	0.517811	NA	NA	NA	NA	NA	NA
NA_RBM38_Taira201203_XENLA_stage_00140731	-0.192338	4.39598	3.98204	0.0459878	0.517811	NA_RBM38_Taira201203_XENLA_stage_00140731	PTHR24011:SF25	SUBFAMILY NOT NAMED	GO SLIM	GO:0003676	nucleic acid binding
Dcaf6_NM_001105264.1	-0.204407	3.29903	3.98191	0.0459915	0.517811	NA	NA	NA	NA	NA	NA
NA_CCDC67_Quigley201207_XENLA_00025966	-0.254337	1.49419	3.98176	0.0459956	0.517811	NA_CCDC67_Quigley201207_XENLA_00025966	PTHR18875	SARCOMA ANTIGEN NY-SAR-24/CYTOSKELETAL PROTEIN SOJO	GO SLIM	GO:0005200	structural constituent of cytoskeleton
Map1lc3b_MAP1LC3B_Taira201203_XENLA_stage_00004114	0.194611	4.04633	3.98081	0.0460214	0.517811	Map1lc3b_MAP1LC3B_Taira201203_XENLA_stage_00004114	PTHR10969	MICROTUBULE-ASSOCIATED PROTEINS 1A/1B LIGHT CHAIN 3-RELATED	GO SLIM	GO:0008092	cytoskeletal protein binding
Cep152_NM_001093617.1	-0.185727	5.08954	3.97691	0.0461281	0.518693	Cep152_NM_001093617.1	PTHR10337	SHC TRANSFORMING PROTEIN	GO SLIM	GO:0005515	protein binding
Nrp2_NRP2_Taira201203_XENLA_tissue_00090130	0.184162	5.61746	3.97398	0.0462083	0.519277	Nrp2_NRP2_Taira201203_XENLA_tissue_00090130	PTHR10127	DISCOIDIN, CUB, EGF, LAMININ , AND ZINC METALLOPROTEASE DOMAIN CONTAINING	GO SLIM	GO:0008237	metallopeptidase activity
Alcam_ALCAM_XeXenL6RMv10025272m	0.181474	5.99257	3.96992	0.04632	0.520214	Alcam_ALCAM_XeXenL6RMv10025272m	PTHR11973:SF2	CD166 ANTIGEN (LEUKOCYTE CELL ADHESION MOLECULE)	GO SLIM	GO:0007398	ectoderm development
NA_RNF19A_Horb201201_XENLA_00104360	-0.182235	5.6128	3.96884	0.0463497	0.520228	NA_RNF19A_Horb201201_XENLA_00104360	PTHR11685:SF5	RING FINGER PROTEIN 19 (DORFIN) (DOUBLE RING-FINGER PROTEIN)	GO SLIM	GO:0019538	protein metabolic process
NA_NM_001096997.1	-0.2231	2.44134	3.96522	0.0464493	0.521028	NA	NA	NA	NA	NA	NA
Pigb_NM_001096043.1	-0.198176	3.55137	3.96088	0.0465693	0.521386	Pigb_NM_001096043.1	PTHR22760	GLYCOSYLTRANSFERASE	GO SLIM	GO:0016740	transferase activity
NA_CINP_Taira201203_XENLA_tissue_00041651	0.205981	3.39845	3.96061	0.0465767	0.521386	NA	NA	NA	NA	NA	NA
NA_FBXO30_mgEST_Xl4jul2012_1013103715	0.268201	1.15544	3.9602	0.0465882	0.521386	NA	NA	NA	NA	NA	NA
Aass_NM_001092511.1	0.190708	4.78565	3.95824	0.0466426	0.521386	Aass_NM_001092511.1	PTHR11133	SACCHAROPINE DEHYDROGENASE	GO SLIM	GO:0016491	oxidoreductase activity
NA_NM_001092347.1	-0.233226	2.10589	3.95583	0.0467093	0.521386	NA_NM_001092347.1	PTHR12634	SIT4(YEAST)-ASSOCIATING PROTEIN-RELATED	GO SLIM	GO:0019208	phosphatase regulator activity
NA_Q08BT4_XENTR_Taira201203_XENLA_tissue_00102662	0.207357	2.93057	3.95354	0.046773	0.521386	NA_Q08BT4_XENTR_Taira201203_XENLA_tissue_00102662	PTHR11200	INOSITOL 5-PHOSPHATASE	Panther Class	PC00121	hydrolase
Impa1_IMPA1_Audic201207_XENLA_00007426	-0.212533	3.00733	3.95175	0.0468227	0.521386	Impa1_IMPA1_Audic201207_XENLA_00007426	PTHR20854	INOSITOL MONOPHOSPHATASE	GO SLIM	GO:0044238	primary metabolic process
Cox5b_COX5B.1_TC443541	0.220988	2.73864	3.95109	0.0468411	0.521386	Cox5b_COX5B.1_TC443541	PTHR10122	CYTOCHROME C OXIDASE SUBUNIT 5B, MITOCHONDRIAL	GO SLIM	GO:0016491	oxidoreductase activity
NA_E1BYU7_CHICK_Taira201203_XENLA_tissue_00112627	0.197888	3.78165	3.95081	0.0468489	0.521386	NA_E1BYU7_CHICK_Taira201203_XENLA_tissue_00112627	PTHR11592	GLUTATHIONE PEROXIDASE	GO SLIM	GO:0004601	peroxidase activity
NA_FAM59A_Ismailoglu201203_XENLA_00062730	0.244723	1.71009	3.95017	0.0468666	0.521386	NA	NA	NA	NA	NA	NA
NA_ATAD3A_Kwon201107_XENLA_00082714	-0.182349	5.48006	3.94971	0.0468795	0.521386	NA_ATAD3A_Kwon201107_XENLA_00082714	PTHR23075	PUTATIVE ATP-ASE	GO SLIM	GO:0016787	hydrolase activity
NA_ATG4C_XeXenL6RMv10049639m	-0.188746	4.4328	3.9496	0.0468825	0.521386	NA_ATG4C_XeXenL6RMv10049639m	PTHR22624:SF15	APG4 AUTOPHAGY 4	GO SLIM	GO:0016787	hydrolase activity
Irx2_IRX2_TC416945	0.185316	5.42088	3.94899	0.0468995	0.521386	Irx2_IRX2_TC416945	PTHR11211	IROQUOIS-CLASS HOMEODOMAIN PROTEIN IRX	GO SLIM	GO:0003676	nucleic acid binding
NA_STXBP3_Taira201203_XENLA_stage_00076859	-0.208615	3.00197	3.94836	0.0469169	0.521386	NA_STXBP3_Taira201203_XENLA_stage_00076859	PTHR11679:SF7	SYNTAXIN BINDING PROTEIN-1,2,3	GO SLIM	GO:0007269	neurotransmitter secretion
NA_TCF20_Taira201203_XENLA_tissue_00123116	-0.196357	3.67544	3.94768	0.0469361	0.521386	NA_TCF20_Taira201203_XENLA_tissue_00123116	PTHR14955	RETINOIC ACID INDUCED 1/TRANSCRIPTION FACTOR 20	GO SLIM	GO:0003676	nucleic acid binding
Tpr_AY902464.1	-0.176884	9.43124	3.9461	0.0469802	0.521386	Tpr_AY902464.1	PTHR18898	NUCLEOPROTEIN TPR-RELATED	GO SLIM	GO:0016740	transferase activity
Akap2_AKAP2_Taira201203_XENLA_tissue_00072043	0.180187	6.03497	3.94607	0.0469809	0.521386	Akap2_AKAP2_Taira201203_XENLA_tissue_00072043	PTHR10498	PARALEMMIN-RELATED	GO SLIM	GO:0007154	cell communication
NA_NM_001127780.1	-0.213644	2.76386	3.94544	0.0469985	0.521386	NA_NM_001127780.1	PTHR19818	ZINC FINGER PROTEIN ZIC AND GLI	GO SLIM	GO:0003676	nucleic acid binding
Bcl11a_NM_001089877.1	-0.22756	2.31963	3.94423	0.0470324	0.521386	Bcl11a_NM_001089877.1	PTHR23233	ZINC FINGER PROTEIN	GO SLIM	GO:0003676	nucleic acid binding
Cir1_CIR1_Taira201203_XENLA_stage_00034598	-0.178695	6.576	3.94279	0.0470727	0.521386	Cir1_CIR1_Taira201203_XENLA_stage_00034598	PTHR13151	CBF1 INTERACTING COREPRESSOR CIR	GO SLIM	GO:0003676	nucleic acid binding
NA_CER1_Taira201203_XENLA_stage_00151181	0.179184	6.70084	3.94222	0.0470885	0.521386	NA	NA	NA	NA	NA	NA
NA_FBLN1_Taira201203_XENLA_tissue_00180854	0.233928	2.51026	3.94157	0.0471067	0.521386	NA	NA	NA	NA	NA	NA
NA_RHPN2_Taira201203_XENLA_stage_00028633	0.188286	4.49895	3.93828	0.0471991	0.521669	NA	NA	NA	NA	NA	NA
NA_MORF4L1_Ismailoglu201203_XENLA_00013660	0.181863	5.49206	3.93769	0.0472156	0.521669	NA_MORF4L1_Ismailoglu201203_XENLA_00013660	PTHR10880	MORTALITY FACTOR 4-LIKE PROTEIN	GO SLIM	GO:0003676	nucleic acid binding
NA_NA_Ismailoglu201203_XENLA_00004822	0.178186	6.98721	3.93762	0.0472176	0.521669	NA	NA	NA	NA	NA	NA
NA_PHF13_TeperekTkacz201206_XENLA_00016847	0.181922	5.5055	3.9358	0.0472686	0.521918	NA	NA	NA	NA	NA	NA
NA_SBNO2_TeperekTkacz201206_XENLA_00049127	0.239182	1.79451	3.93203	0.0473749	0.522494	NA_SBNO2_TeperekTkacz201206_XENLA_00049127	PTHR12706	STRAWBERRY NOTCH-RELATED	GO SLIM	GO:0016787	hydrolase activity
NA_NM_001094642.1	0.23934	1.97962	3.93192	0.0473778	0.522494	NA_NM_001094642.1	PTHR23277:SF36	SUBFAMILY NOT NAMED	GO SLIM	GO:0004872	receptor activity
NA_APLP2_Taira201203_XENLA_tissue_00117889	0.1813	5.86483	3.92985	0.0474361	0.522824	NA	NA	NA	NA	NA	NA
NA_UBC9_CHICK_TeperekTkacz201202_XENLA_00122624	-0.194187	3.95943	3.92872	0.047468	0.522861	NA_UBC9_CHICK_TeperekTkacz201202_XENLA_00122624	PTHR24067	UBIQUITIN-CONJUGATING ENZYME E2	GO SLIM	GO:0016874	ligase activity
Cenpo_CENPO_Taira201203_XENLA_tissue_00104255	-0.195172	3.8417	3.92447	0.0475882	0.523797	NA	NA	NA	NA	NA	NA
NA_HOOK3_XeXenL6RMv10051580m	-0.212353	2.69435	3.92369	0.0476102	0.523797	NA_HOOK3_XeXenL6RMv10051580m	PTHR18947:SF9	HOOK HOMOLOG 3	GO SLIM	GO:0006886	intracellular protein transport
Gm7337_DZIP1_mgEST_Xl4jul2012_1013093058	0.202599	3.21899	3.92115	0.0476822	0.524275	Gm7337_DZIP1_mgEST_Xl4jul2012_1013093058	PTHR21502	ZINC FINGER PROTEIN DZIP1	GO SLIM	GO:0003676	nucleic acid binding
NA_NM_001093922.1	0.208079	3.20992	3.9181	0.0477689	0.524914	NA_NM_001093922.1	PTHR10165	LIPID PHOSPHATE PHOSPHATASE	GO SLIM	GO:0007166	cell surface receptor linked signal transduction
Zcchc11_ZCCHC11_Quigley201207_XENLA_00096620	-0.177953	6.53183	3.91647	0.0478152	0.525108	Zcchc11_ZCCHC11_Quigley201207_XENLA_00096620	PTHR12271	POLY(A) POLYMERASE CID (PAP)-RELATED	GO SLIM	GO:0016740	transferase activity
Ptpn2_PTPN2_Taira201203_XENLA_stage_00194722	-0.224082	2.3206	3.90388	0.0481748	0.52823	Ptpn2_PTPN2_Taira201203_XENLA_stage_00194722	PTHR19134:SF57	PROTEIN TYROSINE PHOSPHATASE, NON-RECEPTOR TYPE NT1	GO SLIM	GO:0016787	hydrolase activity
NA_MPP6_Park201106_XENLA_00009972	-0.247318	1.51898	3.90384	0.0481759	0.52823	NA_MPP6_Park201106_XENLA_00009972	PTHR23122	MEMBRANE-ASSOCIATED GUANYLATE KINASE (MAGUK)	GO SLIM	GO:0016740	transferase activity
Bmpr1a_U16654.1	0.219542	2.47686	3.90262	0.0482109	0.52823	Bmpr1a_U16654.1	PTHR23255	TRANSFORMING GROWTH FACTOR-BETA RECEPTOR TYPE I AND II	GO SLIM	GO:0004675	transmembrane receptor protein serine/threonine kinase activity
Tpbg_TPBG_Audic201207_XENLA_00003789	0.178564	6.25926	3.90219	0.0482232	0.52823	Tpbg_TPBG_Audic201207_XENLA_00003789	PTHR24364	FAMILY NOT NAMED	GO SLIM	GO:0004872	receptor activity
NA_SLC20A2_Taira201203_XENLA_tissue_00279506	-0.199458	3.40732	3.90108	0.048255	0.52823	NA_SLC20A2_Taira201203_XENLA_tissue_00279506	PTHR11101:SF15	SOLUTE CARRIER FAMILY 20, MEMBER 2	GO SLIM	GO:0022857	transmembrane transporter activity
Kif18a_KIF18A_Taira201203_XENLA_stage_00027101	0.183999	5.01009	3.90048	0.0482723	0.52823	Kif18a_KIF18A_Taira201203_XENLA_stage_00027101	PTHR24115	FAMILY NOT NAMED	GO SLIM	GO:0003777	microtubule motor activity
NA_RHOJ_Taira201203_XENLA_tissue_00047001	-0.270587	1.06026	3.89838	0.0483326	0.528321	NA	NA	NA	NA	NA	NA
NA_NM_001092110.1	0.202455	3.40571	3.89819	0.0483382	0.528321	NA_NM_001092110.1	PTHR23123	PHD/F-BOX CONTAINING PROTEIN	GO SLIM	GO:0019538	protein metabolic process
Gmps_GMPS_Taira201203_XENLA_stage_00063499	0.190285	4.06893	3.89524	0.0484231	0.528933	Gmps_GMPS_Taira201203_XENLA_stage_00063499	PTHR11922	GMP SYNTHASE-RELATED	GO SLIM	GO:0016740	transferase activity
NA_REV1_Taira201203_XENLA_stage_00190129	-0.178077	6.33725	3.89164	0.048527	0.529754	NA_REV1_Taira201203_XENLA_stage_00190129	PTHR11076	DNA REPAIR POLYMERASE UMUC / TRANSFERASE FAMILY MEMBER	GO SLIM	GO:0003887	DNA-directed DNA polymerase activity
NA_ROPN1L_TC432782	0.243675	1.76083	3.89015	0.0485701	0.529908	NA	NA	NA	NA	NA	NA
Fgfr1op_NM_001096344.1	0.20421	3.15092	3.88837	0.0486215	0.530061	NA	NA	NA	NA	NA	NA
Pold2_POLD2_Ismailoglu201203_XENLA_00046427	-0.181771	5.38685	3.88672	0.0486694	0.530061	Pold2_POLD2_Ismailoglu201203_XENLA_00046427	PTHR10416	DNA POLYMERASE DELTA SUBUNIT 2	GO SLIM	GO:0003887	DNA-directed DNA polymerase activity
NA_TMEM150A_Quigley201112_XENLA_00029537	-0.264168	1.17696	3.88643	0.0486777	0.530061	NA	NA	NA	NA	NA	NA
NA_RALGPS2_Taira201203_XENLA_tissue_00251876	-0.182528	5.1835	3.88567	0.0486997	0.530061	NA	NA	NA	NA	NA	NA
NA_RNFT2_Taira201203_XENLA_tissue_00048185	-0.25852	1.23667	3.88423	0.0487417	0.530153	NA	NA	NA	NA	NA	NA
Marveld3_MARVELD3_Ismailoglu201203_XENLA_00070126	-0.184489	4.72568	3.88339	0.0487659	0.530153	Marveld3_MARVELD3_Ismailoglu201203_XENLA_00070126	PTHR21737:SF1	MARVEL (MEMBRANE-ASSOCIATING) DOMAIN CONTAINING 3	GO SLIM	GO:0003676	nucleic acid binding
NA_UBFD1_XeXenL6RMv10023524m	-0.181964	5.26501	3.88165	0.0488166	0.530204	NA	NA	NA	NA	NA	NA
NA_BC097830.1	0.248679	1.78689	3.88124	0.0488285	0.530204	NA	NA	NA	NA	NA	NA
NA_NM_001161393.1	-0.186428	4.64106	3.88023	0.0488578	0.530208	NA_NM_001161393.1	PTHR24377	FAMILY NOT NAMED	GO SLIM	GO:0003676	nucleic acid binding
NA_PTPRK_XeXenL6RMv10035232m	-0.181023	5.28397	3.87173	0.049106	0.532115	NA_PTPRK_XeXenL6RMv10035232m	PTHR19134:SF47	RECEPTOR TYROSINE PHOSPHATASE TYPE R2B	GO SLIM	GO:0016787	hydrolase activity
NA_RBL1_Quigley201112_XENLA_00024025	0.19046	4.11536	3.87156	0.0491108	0.532115	NA_RBL1_Quigley201112_XENLA_00024025	PTHR13742:SF9	RETINOBLASTOMA-LIKE PROTEIN 1 (107 KDA RETINOBLASTOMA-ASSOCIATED PROTEIN) (P107)	GO SLIM	GO:0003676	nucleic acid binding
Prdm1_PRDM1_TeperekTkacz201206_XENLA_00074690	0.178946	5.84202	3.87123	0.0491205	0.532115	Prdm1_PRDM1_TeperekTkacz201206_XENLA_00074690	PTHR11389	ZINC FINGER PROTEIN	GO SLIM	GO:0003676	nucleic acid binding
Rab5a_RAB5A_XeXenL6RMv10037938m	0.18665	4.83251	3.86986	0.0491607	0.532151	Rab5a_RAB5A_XeXenL6RMv10037938m	PTHR24073	FAMILY NOT NAMED	GO SLIM	GO:0003924	GTPase activity
NA_PSMG2_Quigley201207_XENLA_00093387	0.203471	3.10926	3.86719	0.049239	0.532151	NA_PSMG2_Quigley201207_XENLA_00093387	PTHR12970	TUMOR NECROSIS FACTOR SUPERFAMILY, MEMBER 5-INDUCED PROTEIN 1 (CLAST3)	GO SLIM	GO:0003676	nucleic acid binding
NA_NEDD9_XeXenL6RMv10026402m	-0.205164	3.17749	3.867	0.0492446	0.532151	NA_NEDD9_XeXenL6RMv10026402m	PTHR10654:SF6	ENHANCER OF FILAMENTATION 1 (HEF1)(CRK-ASSOCIATED SUBSTRATE-RELATED PROTEIN)(CAS-L)	GO SLIM	GO:0005198	structural molecule activity
NA_UHRF1_Kwon201107_XENLA_00109677	-0.178253	6.10764	3.86648	0.0492597	0.532151	NA	NA	NA	NA	NA	NA
NA_RPS4X_XeXenL6RMv10008057m	0.177818	6.54982	3.86617	0.0492689	0.532151	NA_RPS4X_XeXenL6RMv10008057m	PTHR11581	30S/40S RIBOSOMAL PROTEIN S4	GO SLIM	GO:0003735	structural constituent of ribosome
NA_C3ORF64_XeXenL6RMv10053476m	-0.217427	2.50326	3.86359	0.0493447	0.532307	NA_C3ORF64_XeXenL6RMv10053476m	PTHR20961	GLYCOSYLTRANSFERASE	GO SLIM	GO:0016740	transferase activity
Dcakd_DCAKD_Taira201203_XENLA_stage_00079534	-0.241564	1.68679	3.8631	0.0493591	0.532307	Dcakd_DCAKD_Taira201203_XENLA_stage_00079534	PTHR10695	DEPHOSPHO-COA KINASE-RELATED	GO SLIM	GO:0016740	transferase activity
NA_CDC7_Taira201203_XENLA_stage_00075681	0.236095	2.11539	3.86271	0.0493704	0.532307	NA_CDC7_Taira201203_XENLA_stage_00075681	PTHR11909:SF7	CELL DIVISION CONTROL PROTEIN 7	GO SLIM	GO:0016740	transferase activity
Ccdc34_CCDC34_Kwon201107_XENLA_00130226	-0.187159	4.36662	3.86014	0.0494462	0.532518	Ccdc34_CCDC34_Kwon201107_XENLA_00130226	PTHR23247	NY-REN-41 ANTIGEN (L15)-RELATED	GO SLIM	GO:0007166	cell surface receptor linked signal transduction
NA_RPL8_Taira201203_XENLA_stage_00004792	0.180559	5.47156	3.86007	0.0494481	0.532518	NA_RPL8_Taira201203_XENLA_stage_00004792	PTHR13691	RIBOSOMAL PROTEIN L2	GO SLIM	GO:0003735	structural constituent of ribosome
Dip2a_DIP2A_TeperekTkacz201202_XENLA_00141731	-0.179217	5.71329	3.85741	0.0495267	0.533027	NA	NA	NA	NA	NA	NA
Top3a_NM_001092230.1	-0.191137	4.0035	3.8565	0.0495535	0.533027	Top3a_NM_001092230.1	PTHR11390	PROKARYOTIC DNA TOPOISOMERASE	GO SLIM	GO:0005515	protein binding
NA_LRRC16A_Kwon201107_XENLA_00134671	-0.257926	1.25649	3.85546	0.0495843	0.533046	NA	NA	NA	NA	NA	NA
Alkbh8_ALKBH8_Kwon201107_XENLA_00104454	-0.179488	5.58594	3.8525	0.049672	0.533522	NA	NA	NA	NA	NA	NA
NA_GNPNAT1_Taira201203_XENLA_stage_00158421	-0.206529	2.94016	3.852	0.0496868	0.533522	NA_GNPNAT1_Taira201203_XENLA_stage_00158421	PTHR13355	GLUCOSAMINE 6-PHOSPHATE N-ACETYLTRANSFERASE	GO SLIM	GO:0016740	transferase activity
NA_BC094182.1	-0.178884	5.90275	3.84993	0.049748	0.533611	NA_BC094182.1	PTHR10489	CELL ADHESION MOLECULE	GO SLIM	GO:0007154	cell communication
NA_EFCAB6_TC426959	-0.194673	3.64451	3.84975	0.0497533	0.533611	NA	NA	NA	NA	NA	NA
Dapk1_DAPK1_Kwon201107_XENLA_00130733	-0.184675	4.59607	3.84727	0.0498271	0.53409	Dapk1_DAPK1_Kwon201107_XENLA_00130733	PTHR22964:SF1	DEATH- ASSOCIATED PROTEIN KINASE	GO SLIM	GO:0016740	transferase activity
NA_NP_001135599.1_Taira201203_XENLA_tissue_00014372	-0.256002	1.21104	3.84308	0.0499517	0.535114	NA_NP_001135599.1_Taira201203_XENLA_tissue_00014372	PTHR19229	ATP-BINDING CASSETTE TRANSPORTER SUBFAMILY A (ABCA)	GO SLIM	GO:0016787	hydrolase activity
Cttnbp2nl_CTTNBP2NL_Taira201203_XENLA_stage_00146565	-0.231631	1.90281	3.83677	0.0501402	0.536238	NA	NA	NA	NA	NA	NA
Gtpbp6_GTPBP6_Kwon201107_XENLA_00088691	0.230433	2.07231	3.83664	0.050144	0.536238	NA	NA	NA	NA	NA	NA
Fntb_NM_001094312.1	0.207552	2.98391	3.83647	0.050149	0.536238	Fntb_NM_001094312.1	PTHR11774	GERANYLGERANYL TRANSFERASE TYPE BETA SUBUNIT	GO SLIM	GO:0016740	transferase activity
Cgnl1_CGNL1_XeXenL6RMv10046045m	-0.181786	4.93105	3.83565	0.0501736	0.536238	NA	NA	NA	NA	NA	NA
NA_ESYT3_Taira201203_XENLA_tissue_00066366	0.209814	3.12451	3.83336	0.050242	0.536656	NA	NA	NA	NA	NA	NA
NA_NA_Taira201203_XENLA_stage_00122175	0.218546	2.78542	3.83223	0.050276	0.536707	NA	NA	NA	NA	NA	NA
NA_CDKN1B_Taira201203_XENLA_stage_00019878	0.259398	1.42726	3.83044	0.0503298	0.536968	NA_CDKN1B_Taira201203_XENLA_stage_00019878	PTHR10265	CYCLIN-DEPENDENT KINASE INHIBITOR 1	GO SLIM	GO:0019210	kinase inhibitor activity
Dok1_NM_001092439.1	0.18713	4.56431	3.82896	0.0503741	0.537128	Dok1_NM_001092439.1	PTHR21258:SF13	DOCKING PROTEIN 1	GO SLIM	GO:0007154	cell communication
Orc6_NM_001093443.1	-0.176032	6.4842	3.82779	0.0504094	0.537192	Orc6_NM_001093443.1	PTHR13394	ORIGIN RECOGNITION COMPLEX SUBUNIT 6	GO SLIM	GO:0003688	DNA replication origin binding
NA_CDK16_Taira201203_XENLA_tissue_00223089	0.22695	2.31981	3.8252	0.0504873	0.537433	NA_CDK16_Taira201203_XENLA_tissue_00223089	PTHR24056	CELL DIVISION PROTEIN KINASE	GO SLIM	GO:0016740	transferase activity
NA_DDIT4_Taira201203_XENLA_tissue_00155885	0.175229	7.88578	3.82295	0.0505552	0.537433	NA	NA	NA	NA	NA	NA
NA_POLR2H_Taira201203_XENLA_stage_00170345	0.201054	3.2305	3.82292	0.0505561	0.537433	NA_POLR2H_Taira201203_XENLA_stage_00170345	PTHR10917	DNA-DIRECTED RNA POLYMERASES I, II, AND III SUBUNIT RPABC3	GO SLIM	GO:0003676	nucleic acid binding
NA_ARHGEF11_Taira201203_XENLA_stage_00182000	-0.26797	0.991964	3.82197	0.0505847	0.537433	NA_ARHGEF11_Taira201203_XENLA_stage_00182000	PTHR22825	RHO GUANINE EXCHANGE FACTOR	GO SLIM	GO:0005083	small GTPase regulator activity
NA_PFDN6_Park201106_XENLA_00107028	0.183861	4.69315	3.82195	0.0505852	0.537433	NA_PFDN6_Park201106_XENLA_00107028	PTHR21431	PREFOLDIN SUBUNIT 6	GO SLIM	GO:0019538	protein metabolic process
Llph_LOC646644_Taira201203_XENLA_stage_00093771	0.17827	5.91815	3.82121	0.0506078	0.537433	NA	NA	NA	NA	NA	NA
NA_CYHR1_Taira201203_XENLA_stage_00051905	0.274685	1.25652	3.8189	0.0506774	0.53786	NA	NA	NA	NA	NA	NA
NA_TNRC6A_Ismailoglu201203_XENLA_00018962	0.176484	6.45792	3.81577	0.0507722	0.538382	NA_TNRC6A_Ismailoglu201203_XENLA_00018962	PTHR11849:SF50	UNCHARACTERIZED	GO SLIM	GO:0003676	nucleic acid binding
NA_NA_Taira201203_XENLA_stage_00008211	0.193036	3.81224	3.81534	0.0507852	0.538382	NA	NA	NA	NA	NA	NA
NA_AJ555189.1	-0.210344	2.67516	3.81195	0.0508882	0.539162	NA	NA	NA	NA	NA	NA
NA_TRIM71_TeperekTkacz201202_XENLA_00070025	0.193609	4.22183	3.80966	0.0509576	0.539586	NA_TRIM71_TeperekTkacz201202_XENLA_00070025	PTHR24103:SF5	SUBFAMILY NOT NAMED	GO SLIM	GO:0016874	ligase activity
NA_XB-GENE-5904605_Taira201203_XENLA_stage_00204797	0.214456	2.64719	3.8052	0.0510937	0.540714	NA_XB-GENE-5904605_Taira201203_XENLA_stage_00204797	PTHR10108:SF312	SUBFAMILY NOT NAMED	GO SLIM	GO:0008168	methyltransferase activity
NA_RBMS1_XeXenL6RMv10037554m	-0.245755	1.48011	3.80389	0.0511337	0.540762	NA_RBMS1_XeXenL6RMv10037554m	PTHR24011:SF36	SUBFAMILY NOT NAMED	GO SLIM	GO:0003676	nucleic acid binding
Ankrd52_ANKRD52_XeXenL6RMv10039876m	0.212794	2.7063	3.80223	0.0511842	0.540762	NA	NA	NA	NA	NA	NA
NA_NP_001072794.1_Kwon201107_XENLA_00061146	0.234253	1.9153	3.80215	0.0511867	0.540762	NA	NA	NA	NA	NA	NA
Hist1h2ab_NM_001094479.1	-0.192066	3.93174	3.80057	0.0512351	0.54082	Hist1h2ab_NM_001094479.1	PTHR23430	HISTONE H2A	GO SLIM	GO:0003676	nucleic acid binding
NA_CELSR2_Taira201203_XENLA_tissue_00013378	-0.175538	6.55859	3.79962	0.0512641	0.54082	NA	NA	NA	NA	NA	NA
Glrx5_GLRX5_Taira201203_XENLA_stage_00143010	-0.199122	3.69747	3.79891	0.0512861	0.54082	Glrx5_GLRX5_Taira201203_XENLA_stage_00143010	PTHR10293	GLUTAREDOXIN-RELATED PROTEIN	GO SLIM	GO:0016491	oxidoreductase activity
NA_NA_XeXenL6RMv10054476m	-0.195257	3.42253	3.79642	0.0513622	0.54082	NA	NA	NA	NA	NA	NA
NA_RAP1A_Chung201110_XENLA_00015638	-0.180654	4.98601	3.79642	0.0513624	0.54082	NA	NA	NA	NA	NA	NA
NA_ZC3H18_Taira201203_XENLA_tissue_00171267	-0.174413	7.06037	3.79594	0.051377	0.54082	NA	NA	NA	NA	NA	NA
NA_PLRG1_Taira201203_XENLA_stage_00105103	0.178164	5.6732	3.79421	0.0514301	0.54082	NA_PLRG1_Taira201203_XENLA_stage_00105103	PTHR19923	WD40 REPEAT PROTEINPRL1/PRL2-RELATED	GO SLIM	GO:0007165	signal transduction
NA_CCT6A_Taira201203_XENLA_tissue_00172392	0.177733	5.91579	3.7932	0.0514613	0.54082	NA_CCT6A_Taira201203_XENLA_tissue_00172392	PTHR11353	CHAPERONIN	GO SLIM	GO:0019538	protein metabolic process
NA_HAT1_mgEST_Xl4jul2012_1013091794	0.186935	4.18289	3.79271	0.0514762	0.54082	NA_HAT1_mgEST_Xl4jul2012_1013091794	PTHR12046	HISTONE ACETYLTRANSFERASE TYPE B CATALYTIC SUBUNIT	GO SLIM	GO:0016740	transferase activity
NA_NUCB1_Kwon201107_XENLA_00107108	-0.176141	6.22598	3.79236	0.051487	0.54082	NA_NUCB1_Kwon201107_XENLA_00107108	PTHR19237	NUCLEOBINDIN	GO SLIM	GO:0005544	calcium-dependent phospholipid binding
Slc37a3_NM_001088723.1	-0.175667	6.48195	3.7901	0.0515567	0.5411	Slc37a3_NM_001088723.1	PTHR11662:SF11	SOLUTE CARRIER FAMILY 37 MEMBER 3 (GLYCEROL-3-PHOSPHATE TRANSPORTER)	GO SLIM	GO:0022857	transmembrane transporter activity
NA_NM_001122888.1	-0.243204	1.59549	3.78891	0.0515933	0.5411	NA_NM_001122888.1	PTHR12526:SF23	ASPARAGINE-LINKED GLYCOSYLATION PROTEIN 11 HOMOLOG	GO SLIM	GO:0016740	transferase activity
NA_WIPF2_Taira201203_XENLA_stage_00139587	-0.18593	4.49312	3.78862	0.0516022	0.5411	NA	NA	NA	NA	NA	NA
NA_TSPAN6_Ismailoglu201203_XENLA_00026036	0.178005	5.60975	3.78467	0.0517242	0.54207	NA_TSPAN6_Ismailoglu201203_XENLA_00026036	PTHR19282:SF52	TRANSMEMBRANE 4 SUPERFAMILY MEMBER 6	GO SLIM	GO:0005515	protein binding
Mepce_MEPCE_XeXenL6RMv10014405m	-0.177168	5.90245	3.78235	0.0517959	0.542511	NA	NA	NA	NA	NA	NA
NA_RBL1_Audic201207_XENLA_00001382	0.178033	5.6801	3.78072	0.0518464	0.54253	NA_RBL1_Audic201207_XENLA_00001382	PTHR13742:SF9	RETINOBLASTOMA-LIKE PROTEIN 1 (107 KDA RETINOBLASTOMA-ASSOCIATED PROTEIN) (P107)	GO SLIM	GO:0003676	nucleic acid binding
NA_NM_001093997.1	-0.179874	5.12342	3.77979	0.0518751	0.54253	NA	NA	NA	NA	NA	NA
NA_ATF4_Taira201203_XENLA_stage_00190171	-0.175621	6.63862	3.77942	0.0518865	0.54253	NA_ATF4_Taira201203_XENLA_stage_00190171	PTHR13044:SF2	CYCLIC AMP-DEPENDENT TRANSCRIPTION FACTOR ATF-4	GO SLIM	GO:0003676	nucleic acid binding
NA_NA_Chung201110_XENLA_00000241	0.192527	3.73125	3.77715	0.0519572	0.54296	NA	NA	NA	NA	NA	NA
Swap70_SWAP70_Taira201203_XENLA_stage_00019824	-0.202833	3.25148	3.77247	0.0521026	0.54417	Swap70_SWAP70_Taira201203_XENLA_stage_00019824	PTHR14383:SF5	SWAP-70 RECOMBINASE	GO SLIM	GO:0003676	nucleic acid binding
NA_NM_001086513.1	-0.181814	4.7058	3.77111	0.0521451	0.544304	NA_NM_001086513.1	PTHR19302	GAMMA TUBULIN COMPLEX PROTEIN	GO SLIM	GO:0008092	cytoskeletal protein binding
NA_NM_001171715.1	0.185354	4.41721	3.7686	0.0522234	0.544811	NA	NA	NA	NA	NA	NA
Cyp51_CYP51A1_Taira201203_XENLA_stage_00116374	-0.187365	4.1565	3.76215	0.052425	0.546021	Cyp51_CYP51A1_Taira201203_XENLA_stage_00116374	PTHR24286	FAMILY NOT NAMED	GO SLIM	GO:0016491	oxidoreductase activity
NA_ERN1_Kwon201107_XENLA_00023743	-0.181245	4.83488	3.75961	0.052505	0.546021	NA_ERN1_Kwon201107_XENLA_00023743	PTHR13954	IRE1-RELATED	GO SLIM	GO:0016740	transferase activity
NA_GFPT1_Taira201203_XENLA_tissue_00172112	0.17237	8.6954	3.75786	0.0525599	0.546021	NA_GFPT1_Taira201203_XENLA_tissue_00172112	PTHR10937	GLUCOSAMINE--FRUCTOSE-6-PHOSPHATE AMINOTRANSFERASE, ISOMERIZING	GO SLIM	GO:0008483	transaminase activity
NA_NM_001091586.1	-0.216543	2.71103	3.75784	0.0525604	0.546021	NA_NM_001091586.1	PTHR23155:SF24	LEUCINE-RICH REPEAT-CONTAINING PROTEIN, LRR1	GO SLIM	GO:0002376	immune system process
Ddx1_NM_001097883.1	0.18003	5.47373	3.75626	0.05261	0.546021	Ddx1_NM_001097883.1	PTHR24031	FAMILY NOT NAMED	GO SLIM	GO:0003676	nucleic acid binding
Rfxank_RFXANK_Taira201203_XENLA_tissue_00040682	-0.208288	2.71343	3.75606	0.0526165	0.546021	Rfxank_RFXANK_Taira201203_XENLA_tissue_00040682	PTHR24124	FAMILY NOT NAMED	GO SLIM	GO:0003676	nucleic acid binding
NA_AGL_Ismailoglu201203_XENLA_00007191	-0.176293	5.89811	3.75422	0.0526743	0.546021	NA_AGL_Ismailoglu201203_XENLA_00007191	PTHR10569	GLYCOGEN DEBRANCHING ENZYME	GO SLIM	GO:0016787	hydrolase activity
Cxcl12_BC100184.1	0.182217	4.7172	3.75418	0.0526757	0.546021	NA	NA	NA	NA	NA	NA
NA_CAPN8_Ismailoglu201203_XENLA_00047992	0.183275	4.66387	3.75387	0.0526854	0.546021	NA_CAPN8_Ismailoglu201203_XENLA_00047992	PTHR10183	CALPAIN	GO SLIM	GO:0008234	cysteine-type peptidase activity
Zic1_ZIC1_XeXenL6RMv10002521m	-0.175991	6.18882	3.75377	0.0526884	0.546021	Zic1_ZIC1_XeXenL6RMv10002521m	PTHR19818	ZINC FINGER PROTEIN ZIC AND GLI	GO SLIM	GO:0003676	nucleic acid binding
Dscr3_DSCR3_Amin201106_XENLA_00090671	0.23792	1.8877	3.75247	0.0527294	0.546021	Dscr3_DSCR3_Amin201106_XENLA_00090671	PTHR12233	VACUOLAR PROTEIN SORTING 26 RELATED	GO SLIM	GO:0006886	intracellular protein transport
NA_NR2F6_Ismailoglu201203_XENLA_00017780	0.226681	2.29822	3.74952	0.0528228	0.546021	NA	NA	NA	NA	NA	NA
Stradb_STRADB_Audic201207_XENLA_00005010	0.219195	2.34851	3.74951	0.0528229	0.546021	NA	NA	NA	NA	NA	NA
Rreb1_RREB1_Ismailoglu201203_XENLA_00007423	0.179295	5.31853	3.74892	0.0528415	0.546021	Rreb1_RREB1_Ismailoglu201203_XENLA_00007423	PTHR23233	ZINC FINGER PROTEIN	GO SLIM	GO:0003676	nucleic acid binding
Fgd6_FGD6_Kwon201107_XENLA_00058074	0.191601	3.71086	3.74637	0.0529222	0.546021	Fgd6_FGD6_Kwon201107_XENLA_00058074	PTHR12673:SF12	FACIOGENITAL DYSPLASIA PROTEIN 6	GO SLIM	GO:0005083	small GTPase regulator activity
NA_RAVER1_Taira201203_XENLA_tissue_00261913	0.19322	3.71659	3.74606	0.0529322	0.546021	NA_RAVER1_Taira201203_XENLA_tissue_00261913	PTHR23189:SF5	RAVER1	GO SLIM	GO:0031202	RNA splicing factor activity, transesterification mechanism
Fam199x_NM_001092278.1	0.200637	3.20881	3.7457	0.0529436	0.546021	NA	NA	NA	NA	NA	NA
NA_TMEM161B_XeXenL6RMv10038873m	-0.229015	1.90005	3.74502	0.052965	0.546021	NA	NA	NA	NA	NA	NA
NA_CNTLN_TC445038	-0.187069	4.13354	3.74479	0.0529724	0.546021	NA	NA	NA	NA	NA	NA
NA_FAM125B_TeperekTkacz201206_XENLA_00026377	-0.200488	3.02236	3.74464	0.0529771	0.546021	NA	NA	NA	NA	NA	NA
NA_KLHDC10_TeperekTkacz201202_XENLA_00037058	-0.1844	4.34846	3.74207	0.0530586	0.546021	NA	NA	NA	NA	NA	NA
NA_NA_TeperekTkacz201202_XENLA_00052730	0.257225	1.10826	3.741	0.0530926	0.546021	NA_NA_TeperekTkacz201202_XENLA_00052730	PTHR24092	FAMILY NOT NAMED	GO SLIM	GO:0016787	hydrolase activity
NA_TMEM38B_XeXenL6RMv10054253m	-0.208083	3.04364	3.73983	0.0531297	0.546021	NA	NA	NA	NA	NA	NA
NA_NM_001099874.1	-0.211789	2.67178	3.73812	0.0531842	0.546021	NA_NM_001099874.1	PTHR20859:SF9	INTERFERON-GAMMA RECEPTOR BETA CHAIN	GO SLIM	GO:0004896	hematopoietin/interferon-class (D200-domain) cytokine receptor activity
Cc2d1b_CC2D1B_TC414248	-0.218066	2.39639	3.73738	0.0532078	0.546021	NA	NA	NA	NA	NA	NA
NA_KIAA0319L_Horb201201_XENLA_00030902	-0.185359	4.13785	3.73722	0.0532129	0.546021	NA	NA	NA	NA	NA	NA
Fastkd5_FASTKD5_Ismailoglu201203_XENLA_00026441	-0.188907	3.92409	3.7365	0.0532359	0.546021	NA	NA	NA	NA	NA	NA
NA_RHEBL1_TeperekTkacz201202_XENLA_00088709	0.172053	8.6653	3.73647	0.053237	0.546021	NA	NA	NA	NA	NA	NA
NA_NT5C1A_Taira201203_XENLA_stage_00007549	0.19651	3.85009	3.73381	0.0533216	0.546021	NA	NA	NA	NA	NA	NA
Tex2_TEX2_Taira201203_XENLA_tissue_00222563	-0.20895	2.56787	3.73318	0.0533418	0.546021	NA	NA	NA	NA	NA	NA
Stag2_NM_001094828.1	0.27067	1.12946	3.73167	0.0533899	0.546021	Stag2_NM_001094828.1	PTHR11199	STROMAL ANTIGEN	GO SLIM	GO:0003676	nucleic acid binding
Clasrp_CLASRP_Horb201201_XENLA_00037811	0.184861	4.31815	3.73165	0.0533906	0.546021	Clasrp_CLASRP_Horb201201_XENLA_00037811	PTHR13161	SPLICING FACTOR (SUPPRESSOR OF WHITE APRICOT)	GO SLIM	GO:0031202	RNA splicing factor activity, transesterification mechanism
Gcnt1_GCNT1_TC414970	-0.255734	1.32077	3.7316	0.0533922	0.546021	Gcnt1_GCNT1_TC414970	PTHR19297:SF9	BETA-1,3-GALACTOSYL-O-GLYCOSYL-GLYCOPROTEIN BETA-1,6-N- ACETYLGLUCOSAMINYLTRANSFERASE	GO SLIM	GO:0016740	transferase activity
Cdkn2c_CDKN2C_Taira201203_XENLA_tissue_00150266	0.250847	1.66151	3.73125	0.0534035	0.546021	NA	NA	NA	NA	NA	NA
NA_PBK_Taira201203_XENLA_stage_00160422	0.207654	2.81068	3.73086	0.0534157	0.546021	NA_PBK_Taira201203_XENLA_stage_00160422	PTHR26266	FAMILY NOT NAMED	GO SLIM	GO:0016740	transferase activity
Pde10a_PDE10A_Taira201203_XENLA_stage_00202627	0.211822	2.75341	3.73045	0.053429	0.546021	Pde10a_PDE10A_Taira201203_XENLA_stage_00202627	PTHR11347:SF19	CAMP AND CAMP-INHIBITED CGMP 3,5-CYCLIC PHOSPHODIESTERASE 10A	GO SLIM	GO:0016787	hydrolase activity
NA_CLASP1_TC413555	-0.173999	6.4002	3.73008	0.053441	0.546021	NA_CLASP1_TC413555	PTHR21567:SF11	CLASP2 PROTEIN	GO SLIM	GO:0005198	structural molecule activity
Mtss1_MTSS1.1_XeXenL6RMv10007756m	-0.262655	1.17024	3.72862	0.0534874	0.546191	Mtss1_MTSS1.1_XeXenL6RMv10007756m	PTHR15708	ACTIN BUNDLING/MISSING IN METASTASIS-RELATED	GO SLIM	GO:0005198	structural molecule activity
Ift140_IFT140_Ismailoglu201203_XENLA_00010316	-0.181596	4.64342	3.72624	0.0535639	0.546581	Ift140_IFT140_Ismailoglu201203_XENLA_00010316	PTHR15722	IFT140/172-RELATED	GO SLIM	GO:0005198	structural molecule activity
NA_RUFY1_XeXenL6RMv10001496m	-0.247093	1.41466	3.72557	0.0535852	0.546581	NA_RUFY1_XeXenL6RMv10001496m	PTHR22835:SF37	RUN AND FYVE DOMAIN CONTAINING PROTEIN	GO SLIM	GO:0003676	nucleic acid binding
NA_RNF208_Ismailoglu201203_XENLA_00031649	-0.246306	1.60966	3.72121	0.0537254	0.547706	NA	NA	NA	NA	NA	NA
NA_BC072135.1	-0.212601	2.55377	3.71873	0.0538053	0.548216	NA_BC072135.1	PTHR10460	ABL INTERACTOR	GO SLIM	GO:0005083	small GTPase regulator activity
NA_SLC27A2_Horb201201_XENLA_00160791	-0.208961	2.81266	3.71454	0.0539406	0.549022	NA_SLC27A2_Horb201201_XENLA_00160791	PTHR24096	FAMILY NOT NAMED	GO SLIM	GO:0008152	metabolic process
NA_RCSD1_Taira201203_XENLA_tissue_00043341	-0.279493	0.72327	3.71442	0.0539443	0.549022	NA_RCSD1_Taira201203_XENLA_tissue_00043341	PTHR21669:SF2	CAPZ-INTERACTING PROTEIN	GO SLIM	GO:0005198	structural molecule activity
NA_CNRIP1_TeperekTkacz201206_XENLA_00111534	0.196295	3.5273	3.71094	0.0540571	0.549754	NA	NA	NA	NA	NA	NA
NA_BC046263.1	-0.17506	5.86928	3.71001	0.054087	0.549754	NA	NA	NA	NA	NA	NA
NA_AF170275.1	-0.173046	6.93273	3.70942	0.0541061	0.549754	NA_AF170275.1	PTHR23288:SF4	OCCLUDIN	GO SLIM	GO:0003676	nucleic acid binding
Cass4_CASS4_Taira201203_XENLA_stage_00086262	-0.17618	5.79172	3.70714	0.0541802	0.550003	Cass4_CASS4_Taira201203_XENLA_stage_00086262	PTHR10654:SF4	CAS SCAFFOLDING PROTEIN FAMILY MEMBER 4 (HEF1-EFS-P130CAS-LIKE PROTEIN)(HEPL)(HEF-LIKE PROTEIN)	GO SLIM	GO:0005198	structural molecule activity
Zc4h2_ZC4H2_TC421620	0.179968	5.03993	3.70682	0.0541906	0.550003	NA	NA	NA	NA	NA	NA
Fam13a_FAM13A_Kwon201107_XENLA_00060139	-0.223313	2.06075	3.70458	0.0542633	0.550335	NA	NA	NA	NA	NA	NA
NA_NA_Amin201106_XENLA_00039481	-0.234753	1.71563	3.70318	0.0543087	0.550335	NA_NA_Amin201106_XENLA_00039481	PTHR11200	INOSITOL 5-PHOSPHATASE	Panther Class	PC00121	hydrolase
NA_RFWD3_XeXenL6RMv10021612m	0.227391	2.02713	3.70235	0.054336	0.550335	NA_RFWD3_XeXenL6RMv10021612m	PTHR16047	RFWD3 PROTEIN	GO SLIM	GO:0016874	ligase activity
Ikbip_IKBIP_Ismailoglu201203_XENLA_00062907	-0.189996	3.6757	3.70096	0.0543813	0.550335	NA	NA	NA	NA	NA	NA
NA_MLLT3_Taira201203_XENLA_stage_00062353	-0.208908	2.87335	3.70033	0.0544017	0.550335	NA_MLLT3_Taira201203_XENLA_stage_00062353	PTHR23195	YEATS DOMAIN	GO SLIM	GO:0003676	nucleic acid binding
Ubfd1_UBFD1_Taira201203_XENLA_stage_00123195	-0.173549	6.32521	3.69758	0.0544914	0.550335	NA	NA	NA	NA	NA	NA
NA_USP28_Taira201203_XENLA_tissue_00185040	0.199901	2.99825	3.69702	0.0545098	0.550335	NA_USP28_Taira201203_XENLA_tissue_00185040	PTHR24006:SF2	SUBFAMILY NOT NAMED	GO SLIM	GO:0016787	hydrolase activity
NA_NFYB_TeperekTkacz201202_XENLA_00132645	-0.178216	5.02957	3.69684	0.0545155	0.550335	NA	NA	NA	NA	NA	NA
NA_PAM_Taira201203_XENLA_tissue_00083664	0.256453	1.22772	3.69667	0.0545213	0.550335	NA_PAM_Taira201203_XENLA_tissue_00083664	PTHR10680	PEPTIDYL-GLYCINE ALPHA-AMIDATING MONOOXYGENASE	GO SLIM	GO:0016491	oxidoreductase activity
NA_PMP22_TC415619	0.215067	2.75517	3.6966	0.0545234	0.550335	NA_PMP22_TC415619	PTHR10671:SF7	PERIPHERAL MYELIN PROTEIN 22, PMP22	GO SLIM	GO:0005198	structural molecule activity
NA_KIRREL2_Taira201203_XENLA_tissue_00262547	0.173303	6.59833	3.69502	0.054575	0.550378	NA_KIRREL2_Taira201203_XENLA_tissue_00262547	PTHR11640:SF14	KIN OF IRRE-LIKE PROTEIN 1	GO SLIM	GO:0006915	apoptosis
NA_CCNB1.2_Taira201203_XENLA_tissue_00082055	-0.170439	9.25931	3.69409	0.0546057	0.550378	NA_CCNB1.2_Taira201203_XENLA_tissue_00082055	PTHR10177	CYCLINE	GO SLIM	GO:0005515	protein binding
NA_KIF9_TeperekTkacz201206_XENLA_00047152	-0.206025	2.81967	3.69238	0.0546617	0.550378	NA_KIF9_TeperekTkacz201206_XENLA_00047152	PTHR24115	FAMILY NOT NAMED	GO SLIM	GO:0003777	microtubule motor activity
Nmnat1_NM_001097719.1	-0.198779	3.06072	3.69137	0.0546946	0.550378	Nmnat1_NM_001097719.1	PTHR12039	NICOTINAMIDE MONONUCLEOTIDE ADENYLYLTRANSFERASE	GO SLIM	GO:0016740	transferase activity
Ndufaf6_A9JS03_XENTR_XeXenL6RMv10042677m	0.258676	1.24334	3.69082	0.0547127	0.550378	NA	NA	NA	NA	NA	NA
Msi1_NM_001090571.1	0.187536	4.14152	3.69056	0.0547213	0.550378	Msi1_NM_001090571.1	PTHR24012	FAMILY NOT NAMED	GO SLIM	GO:0003676	nucleic acid binding
NA_BC129789.1	-0.173885	6.2212	3.69006	0.0547377	0.550378	NA	NA	NA	NA	NA	NA
Unc45b_NM_001094003.1	-0.217116	3.03902	3.68821	0.0547984	0.550686	Unc45b_NM_001094003.1	PTHR22904:SF21	STRIATED MUSCLE UNC45 (CARDIOMYOPATHY ASSOCIATED 4)	GO SLIM	GO:0019538	protein metabolic process
NA_STK10_TeperekTkacz201206_XENLA_00108632	-0.176248	5.33926	3.68681	0.0548444	0.550722	NA	NA	NA	NA	NA	NA
NA_B4GALT6_Taira201203_XENLA_stage_00055152	0.208353	2.77059	3.68628	0.054862	0.550722	NA_B4GALT6_Taira201203_XENLA_stage_00055152	PTHR19300	BETA-1,4-GALACTOSYLTRANSFERASE	GO SLIM	GO:0016740	transferase activity
Aplnr_BC139486.1	0.173006	7.37653	3.68318	0.054964	0.55133	NA	NA	NA	NA	NA	NA
Enah_NM_001092972.1	-0.17416	5.94621	3.68261	0.0549827	0.55133	Enah_NM_001092972.1	PTHR11202:SF1	PROTEIN ENABLED HOMOLOG	GO SLIM	GO:0008092	cytoskeletal protein binding
NA_HOMER3_Ismailoglu201203_XENLA_00024006	-0.185947	3.89916	3.67659	0.0551817	0.55257	NA_HOMER3_Ismailoglu201203_XENLA_00024006	PTHR10918	HOMER	GO SLIM	GO:0005515	protein binding
NA_MAZ_Taira201203_XENLA_stage_00208180	-0.196489	3.30258	3.67647	0.0551857	0.55257	NA_MAZ_Taira201203_XENLA_stage_00208180	PTHR11389	ZINC FINGER PROTEIN	GO SLIM	GO:0003676	nucleic acid binding
Ttc13_TTC13_TeperekTkacz201206_XENLA_00046106	-0.194346	3.40397	3.67613	0.0551967	0.55257	Ttc13_TTC13_TeperekTkacz201206_XENLA_00046106	PTHR23083	TETRATRICOPEPTIDE REPEAT PROTEIN, TPR	GO SLIM	GO:0016740	transferase activity
NA_NM_001094603.1	0.270051	0.895981	3.6743	0.0552573	0.552874	NA_NM_001094603.1	PTHR12103	CYTOSOLIC PURINE 5-NUCLEOTIDASE-RELATED	GO SLIM	GO:0016787	hydrolase activity
NA_GATA2_TC436966	0.190882	3.7933	3.67131	0.0553566	0.553335	NA_GATA2_TC436966	PTHR10071	TRANSCRIPTION FACTOR GATA (GATA BINDING FACTOR)	GO SLIM	GO:0003676	nucleic acid binding
NA_NM_001092621.1	-0.188436	4.07453	3.6711	0.0553636	0.553335	NA_NM_001092621.1	PTHR23430	HISTONE H2A	GO SLIM	GO:0003676	nucleic acid binding
Hdx_HDX_Taira201203_XENLA_stage_00150296	-0.205675	2.74358	3.66776	0.0554746	0.554142	Hdx_HDX_Taira201203_XENLA_stage_00150296	PTHR11636:SF27	SUBFAMILY NOT NAMED	GO SLIM	GO:0003676	nucleic acid binding
Cwc25_CWC25_TeperekTkacz201202_XENLA_00018281	-0.172376	6.75447	3.66633	0.0555223	0.554316	NA	NA	NA	NA	NA	NA
NA_ROCK1_Ismailoglu201203_XENLA_00054980	-0.175051	5.54672	3.65863	0.0557794	0.555805	NA_ROCK1_Ismailoglu201203_XENLA_00054980	PTHR22988:SF3	RHO-ASSOCIATED, COILED-COIL CONTAINING PROTEIN KINASE	GO SLIM	GO:0016740	transferase activity
Nudt22_NUDT22_Ismailoglu201203_XENLA_00065481	-0.171417	7.34881	3.65858	0.0557813	0.555805	NA	NA	NA	NA	NA	NA
Cnrip1_CNRIP1_Taira201203_XENLA_tissue_00160565	0.189058	3.92301	3.65827	0.0557916	0.555805	NA	NA	NA	NA	NA	NA
NA_DYNLRB1_Taira201203_XENLA_stage_00139286	0.241736	1.57897	3.65824	0.0557927	0.555805	NA_DYNLRB1_Taira201203_XENLA_stage_00139286	PTHR10779	DYNEIN LIGHT CHAIN ROADBLOCK	GO SLIM	GO:0005198	structural molecule activity
NA_CCDC41_Taira201203_XENLA_tissue_00260260	-0.178306	5.08031	3.65594	0.0558698	0.555948	NA_CCDC41_Taira201203_XENLA_tissue_00260260	PTHR23170	NY-REN-58 ANTIGEN	GO SLIM	GO:0007154	cell communication
NA_F6UT48_XENTR_TeperekTkacz201206_XENLA_00062049	0.185833	4.26528	3.65537	0.0558887	0.555948	NA_F6UT48_XENTR_TeperekTkacz201206_XENLA_00062049	PTHR24418	TYROSINE-PROTEIN KINASE	GO SLIM	GO:0016740	transferase activity
NA_PHB_CHICK_Taira201203_XENLA_tissue_00193235	0.197106	3.3935	3.6551	0.055898	0.555948	NA_PHB_CHICK_Taira201203_XENLA_tissue_00193235	PTHR23222	PROHIBITIN	GO SLIM	GO:0007049	cell cycle
NA_NM_001091300.1	0.194161	3.38194	3.65339	0.055955	0.556214	NA	NA	NA	NA	NA	NA
NA_CDCA3_Taira201203_XENLA_stage_00038040	0.171172	7.7167	3.65216	0.0559967	0.556259	NA	NA	NA	NA	NA	NA
Tbcel_TBCEL_Quigley201207_XENLA_00038280	-0.189756	3.61833	3.65146	0.0560202	0.556259	Tbcel_TBCEL_Quigley201207_XENLA_00038280	PTHR15140	TUBULIN-SPECIFIC CHAPERONE E	GO SLIM	GO:0016043	cellular component organization and biogenesis
Desi1_PPPDE2_TC463633	0.232849	1.67042	3.64993	0.0560715	0.556467	NA	NA	NA	NA	NA	NA
NA_ZC3H3_XeXenL6RMv10024344m	-0.19256	3.59634	3.64868	0.0561136	0.556584	NA_ZC3H3_XeXenL6RMv10024344m	PTHR23102	ZINC FINGER (CLIPPER)-RELATED	GO SLIM	GO:0016787	hydrolase activity
NA_RCAN1_Taira201203_XENLA_stage_00171636	-0.179863	4.59225	3.64601	0.0562038	0.557177	NA_RCAN1_Taira201203_XENLA_stage_00171636	PTHR10300:SF4	CALCIPRESSIN 1	GO SLIM	GO:0005515	protein binding
NA_U44049.1	0.185235	4.03317	3.64382	0.0562776	0.557534	NA_U44049.1	PTHR11630:SF45	DNA REPLICATION LICENSING FACTOR MCM4	GO SLIM	GO:0016787	hydrolase activity
NA_FAM83F_Quigley201207_XENLA_00049711	-0.2212	2.04228	3.64308	0.0563027	0.557534	NA	NA	NA	NA	NA	NA
NA_NA_Taira201203_XENLA_tissue_00041462	-0.184633	4.13205	3.64141	0.0563592	0.557534	NA	NA	NA	NA	NA	NA
NA_BC128982.1	-0.174066	5.8035	3.64134	0.0563614	0.557534	NA	NA	NA	NA	NA	NA
NA_NM_001096674.1	0.196679	3.25062	3.63858	0.0564549	0.558012	NA_NM_001096674.1	PTHR22825	RHO GUANINE EXCHANGE FACTOR	GO SLIM	GO:0005083	small GTPase regulator activity
Rab11fip3_RAB11FIP3_Kwon201107_XENLA_00070088	-0.207298	2.64048	3.63812	0.0564706	0.558012	NA	NA	NA	NA	NA	NA
NA_M14455.1	0.177252	5.5198	3.63567	0.0565539	0.558442	NA_M14455.1	PTHR11514	MYC	GO SLIM	GO:0003676	nucleic acid binding
Trpv4_TRPV4_Ismailoglu201203_XENLA_00015908	-0.184743	4.13577	3.63505	0.056575	0.558442	Trpv4_TRPV4_Ismailoglu201203_XENLA_00015908	PTHR10582:SF4	TRANSIENT RECEPTOR POTENTIAL CATION CHANNEL SUBFAMILY V MEMBER 4	GO SLIM	GO:0005216	ion channel activity
Frmd6_FRMD6_Taira201203_XENLA_stage_00194266	0.19863	3.08757	3.627	0.0568493	0.560305	NA	NA	NA	NA	NA	NA
Gnl3l_GNL3L_Ismailoglu201203_XENLA_00008112	0.183516	4.1014	3.62694	0.0568511	0.560305	Gnl3l_GNL3L_Ismailoglu201203_XENLA_00008112	PTHR11089:SF13	GTP-BINDING PROTEIN-ANIMAL	GO SLIM	GO:0003924	GTPase activity
Llgl2_NM_001092087.1	-0.176221	5.19886	3.62682	0.0568553	0.560305	Llgl2_NM_001092087.1	PTHR10241	LETHAL(2) GIANT LARVAE PROTEIN	GO SLIM	GO:0007269	neurotransmitter secretion
NA_BLCAP_Ismailoglu201203_XENLA_00064332	-0.179954	4.55943	3.62241	0.0570062	0.56149	NA	NA	NA	NA	NA	NA
NA_KIAA1549_Kwon201107_XENLA_00020592	-0.214557	2.54236	3.61505	0.057259	0.563456	NA	NA	NA	NA	NA	NA
Polr2h_POLR2H_Taira201203_XENLA_stage_00021904	0.190875	3.51525	3.61393	0.0572974	0.563456	Polr2h_POLR2H_Taira201203_XENLA_stage_00021904	PTHR10917	DNA-DIRECTED RNA POLYMERASES I, II, AND III SUBUNIT RPABC3	GO SLIM	GO:0003676	nucleic acid binding
NA_NA_Taira201203_XENLA_tissue_00078973	0.174526	5.56268	3.61318	0.0573234	0.563456	NA	NA	NA	NA	NA	NA
NA_BEND5_Taira201203_XENLA_tissue_00186759	-0.195501	3.34171	3.61278	0.0573372	0.563456	NA	NA	NA	NA	NA	NA
Hmox1_HMOX1_Park201106_XENLA_00018974	0.174822	6.05011	3.61199	0.0573644	0.563456	Hmox1_HMOX1_Park201106_XENLA_00018974	PTHR10720	HEME OXYGENASE	GO SLIM	GO:0016491	oxidoreductase activity
NA_S1PR5_Taira201203_XENLA_stage_00019774	-0.186384	4.08316	3.611	0.0573987	0.563456	NA_S1PR5_Taira201203_XENLA_stage_00019774	PTHR22750:SF26	SUBFAMILY NOT NAMED	GO SLIM	GO:0004872	receptor activity
NA_AB499903.2	-0.17029	7.2258	3.60994	0.0574353	0.563456	NA_AB499903.2	PTHR23285	RING FINGER AND KH DOMAIN CONTAINING PROTEIN 1	GO SLIM	GO:0016874	ligase activity
Hmgxb4_HMGXB4_TeperekTkacz201202_XENLA_00084100	-0.173106	5.73667	3.60947	0.0574516	0.563456	Hmgxb4_HMGXB4_TeperekTkacz201202_XENLA_00084100	PTHR25461:SF3	SUBFAMILY NOT NAMED	GO SLIM	GO:0004872	receptor activity
NA_TRPM5_XeXenL6RMv10025637m	-0.228871	2.46662	3.60637	0.0575585	0.564023	NA_TRPM5_XeXenL6RMv10025637m	PTHR13800	TRANSIENT RECEPTOR POTENTIAL CATION CHANNEL, SUBFAMILY M, MEMBER 6	GO SLIM	GO:0004872	receptor activity
NA_CCNB1.2_Quigley201207_XENLA_00033085	-0.168377	9.44358	3.60502	0.0576052	0.564023	NA_CCNB1.2_Quigley201207_XENLA_00033085	PTHR10177	CYCLINE	GO SLIM	GO:0005515	protein binding
NA_LRIG1_TeperekTkacz201202_XENLA_00128586	0.256886	1.33541	3.605	0.0576062	0.564023	NA_LRIG1_TeperekTkacz201202_XENLA_00128586	PTHR24367	LEUCINE-RICH REPEAT-CONTAINING PROTEIN	GO SLIM	GO:0004872	receptor activity
Fam107a_NM_001094600.1	-0.197614	3.24019	3.60424	0.0576324	0.564023	NA	NA	NA	NA	NA	NA
NA_KIAA0319L_mgEST_Xl4jul2012_1013091664	-0.185086	3.81906	3.6031	0.057672	0.564109	NA	NA	NA	NA	NA	NA
Arhgap39_ARHGAP39_Taira201203_XENLA_tissue_00120894	0.175842	5.6094	3.60058	0.0577595	0.564622	NA	NA	NA	NA	NA	NA
Cacna2d1_CACNA2D1_Ismailoglu201203_XENLA_00031339	0.267211	0.850072	3.59904	0.0578129	0.564622	Cacna2d1_CACNA2D1_Ismailoglu201203_XENLA_00031339	PTHR10166:SF6	VOLTAGE-DEPENDENT CALCIUM CHANNEL SUBUNIT ALPHA-2/DELTA-1	GO SLIM	GO:0005261	cation channel activity
NA_NM_001094159.1	-0.194276	3.34367	3.59893	0.0578168	0.564622	NA_NM_001094159.1	PTHR21584	DIFFERENTIAL DISPLAY AND ACTIVATED BY P53 (DDA3)/G2 S PHASE EXPRESSED 1	GO SLIM	GO:0050896	response to stimulus
NA_GPM6B_Taira201203_XENLA_tissue_00047449	-0.195947	3.17247	3.59523	0.0579456	0.56519	NA	NA	NA	NA	NA	NA
NA_NM_001096111.1	0.17735	4.91192	3.59476	0.057962	0.56519	NA_NM_001096111.1	PTHR17204:SF1	MRNA PROCESSING-RELATED	GO SLIM	GO:0031202	RNA splicing factor activity, transesterification mechanism
NA_TLL1_XeXenL6RMv10019269m	0.228509	2.02237	3.59417	0.0579827	0.56519	NA_TLL1_XeXenL6RMv10019269m	PTHR10127	DISCOIDIN, CUB, EGF, LAMININ , AND ZINC METALLOPROTEASE DOMAIN CONTAINING	GO SLIM	GO:0008237	metallopeptidase activity
NA_TSPYL2_Kwon201107_XENLA_00046574	-0.179464	4.45891	3.59095	0.0580949	0.56519	NA_TSPYL2_Kwon201107_XENLA_00046574	PTHR11875:SF11	TESTIS-SPECIFIC Y-ENCODED-LIKE PROTEIN 1	GO SLIM	GO:0019208	phosphatase regulator activity
Mdk_NM_001087887.1	0.186837	4.34272	3.59075	0.0581022	0.56519	Mdk_NM_001087887.1	PTHR13850	PLEIOTROPHIN FAMILY MEMBER	GO SLIM	GO:0005515	protein binding
NA_SLC22A4_Quigley201207_XENLA_00017234	0.192154	3.44369	3.59046	0.058112	0.56519	NA_SLC22A4_Quigley201207_XENLA_00017234	PTHR24064:SF53	SUBFAMILY NOT NAMED	GO SLIM	GO:0016874	ligase activity
NA_ISM1_Taira201203_XENLA_stage_00103180	-0.175747	5.29757	3.58946	0.0581473	0.56519	NA_ISM1_Taira201203_XENLA_stage_00103180	PTHR11036	SEMAPHORIN	GO SLIM	GO:0005515	protein binding
Cabin1_CABIN1_Ismailoglu201203_XENLA_00059530	-0.17369	5.43036	3.58801	0.058198	0.56519	Cabin1_CABIN1_Ismailoglu201203_XENLA_00059530	PTHR15502	CALCINEURIN-BINDING PROTEIN CABIN 1-RELATED	GO SLIM	GO:0005515	protein binding
Rpl31_RPL31_Kwon201107_XENLA_00067104	0.177129	4.93352	3.58702	0.0582326	0.56519	Rpl31_RPL31_Kwon201107_XENLA_00067104	PTHR10956	60S RIBOSOMAL PROTEIN L31	GO SLIM	GO:0003735	structural constituent of ribosome
NA_CAMTA1_Quigley201207_XENLA_00022774	0.218804	2.28905	3.58592	0.0582712	0.56519	NA	NA	NA	NA	NA	NA
Nphp1_NPHP1_Kwon201107_XENLA_00127459	-0.18236	4.18873	3.5851	0.0582997	0.56519	Nphp1_NPHP1_Kwon201107_XENLA_00127459	PTHR15176	NEPHROCYSTIN	GO SLIM	GO:0007154	cell communication
Cdc25a_AF090829.1	-0.174444	5.48636	3.58411	0.0583348	0.56519	Cdc25a_AF090829.1	PTHR10828	M-PHASE INDUCER PHOSPHATASE (DUAL SPECIFICITY PHOSPHATASE CDC25)	GO SLIM	GO:0016787	hydrolase activity
Cep135_CEP135_Chung201110_XENLA_00064764	0.200651	2.83455	3.58328	0.058364	0.56519	Cep135_CEP135_Chung201110_XENLA_00064764	PTHR23159:SF3	GB DEF: CENTROSOMAL PROTEIN OF 135 KDA (CEP135 PROTEIN)	GO SLIM	GO:0005515	protein binding
Pacsin3_NM_001092905.1	-0.190378	3.48218	3.58299	0.0583741	0.56519	Pacsin3_NM_001092905.1	PTHR10959	PROTEIN KINASE C AND CASEIN KINASE SUBSTRATE IN NEURONS PROTEIN	GO SLIM	GO:0007165	signal transduction
NA_ADAMTSL5_Taira201203_XENLA_tissue_00045964	0.222083	2.05961	3.58288	0.0583779	0.56519	NA_ADAMTSL5_Taira201203_XENLA_tissue_00045964	PTHR13723:SF108	ADAMTS-19	GO SLIM	GO:0016787	hydrolase activity
NA_EIF1B_Taira201203_XENLA_stage_00070323	0.168338	9.13966	3.58254	0.0583898	0.56519	NA	NA	NA	NA	NA	NA
NA_NM_001092570.1	0.183871	3.91101	3.58228	0.0583988	0.56519	NA_NM_001092570.1	PTHR19375	HEAT SHOCK PROTEIN 70KDA	GO SLIM	GO:0050896	response to stimulus
NA_PBX3_Ismailoglu201203_XENLA_00049154	0.223564	2.30483	3.58082	0.0584504	0.56539	NA_PBX3_Ismailoglu201203_XENLA_00049154	PTHR11850	HOMEOBOX PROTEIN TRANSCRIPTION FACTORS	GO SLIM	GO:0003676	nucleic acid binding
Rfc1_RFC1_Ismailoglu201203_XENLA_00050463	-0.169752	6.91317	3.57833	0.058538	0.565862	Rfc1_RFC1_Ismailoglu201203_XENLA_00050463	PTHR11107	BRCT DOMAIN-CONTAINING PROTEIN	GO SLIM	GO:0003676	nucleic acid binding
NA_SERBP1_XeXenL6RMv10036196m	0.169043	7.61062	3.57695	0.0585865	0.565862	NA_SERBP1_XeXenL6RMv10036196m	PTHR12299:SF8	PLASMINOGEN ACTIVATOR INHIBITOR 1 RNA-BINDING PROTEIN (PAI1 RNA- BINDING PROTEIN 1)	GO SLIM	GO:0003676	nucleic acid binding
NA_AGPAT6_Kwon201107_XENLA_00107900	-0.227674	1.80833	3.57681	0.0585917	0.565862	NA_AGPAT6_Kwon201107_XENLA_00107900	PTHR23063	ACETYLTRANSFERASE-RELATED	GO SLIM	GO:0005544	calcium-dependent phospholipid binding
Sec16a_B5DED7_XENTR_Ismailoglu201203_XENLA_00056174	-0.169664	6.90465	3.57265	0.0587384	0.566981	NA	NA	NA	NA	NA	NA
Supt3_SUPT3H_TeperekTkacz201202_XENLA_00103917	-0.175623	5.02183	3.57153	0.0587782	0.567066	Supt3_SUPT3H_TeperekTkacz201202_XENLA_00103917	PTHR11380	TRANSCRIPTION INITIATION FACTOR TFIID/SUPT3-RELATED	GO SLIM	GO:0003676	nucleic acid binding
Clpx_CLPX_Ismailoglu201203_XENLA_00033266	-0.190993	3.27866	3.56608	0.0589712	0.568044	Clpx_CLPX_Ismailoglu201203_XENLA_00033266	PTHR11262	HSL AND CLP PROTEASE	GO SLIM	GO:0019538	protein metabolic process
Slc39a14_SLC39A14_Taira201203_XENLA_stage_00061563	-0.24821	1.50248	3.56606	0.058972	0.568044	Slc39a14_SLC39A14_Taira201203_XENLA_stage_00061563	PTHR12191	SOLUTE CARRIER FAMILY 39	GO SLIM	GO:0022857	transmembrane transporter activity
Rps3a_NM_001086856.1	0.16958	6.78077	3.56514	0.0590047	0.568044	Rps3a_NM_001086856.1	PTHR11830	40S RIBOSOMAL PROTEIN S3A	GO SLIM	GO:0003735	structural constituent of ribosome
NA_BC130189.1	-0.189001	3.47266	3.56424	0.0590366	0.568044	NA_BC130189.1	PTHR15073	MICROTUBULE-ASSOCIATED PROTEIN	GO SLIM	GO:0008092	cytoskeletal protein binding
Pycrl_BC129663.1	0.208084	2.61222	3.56384	0.059051	0.568044	Pycrl_BC129663.1	PTHR11645	PYRROLINE-5-CARBOXYLATE REDUCTASE	GO SLIM	GO:0016491	oxidoreductase activity
Vkorc1l1_BC097808.1	0.232315	1.77114	3.56278	0.0590887	0.568044	Vkorc1l1_BC097808.1	PTHR14519	VITAMIN K EPOXIDE REDUCTASE COMPLEX, SUBUNIT 1	GO SLIM	GO:0016491	oxidoreductase activity
NA_HIGD2A_Horb201201_XENLA_00074637	0.200426	2.97861	3.56256	0.0590964	0.568044	NA	NA	NA	NA	NA	NA
Gbx2_BC146638.1	0.196356	3.39114	3.55942	0.0592085	0.568733	Gbx2_BC146638.1	PTHR24334	FAMILY NOT NAMED	GO SLIM	GO:0003676	nucleic acid binding
NA_CEBPG_TC418024	-0.184468	3.88041	3.55881	0.0592301	0.568733	NA_CEBPG_TC418024	PTHR23334	CCAAT/ENHANCER BINDING PROTEIN	GO SLIM	GO:0003676	nucleic acid binding
Dlg3_DLG3_Taira201203_XENLA_stage_00158832	-0.169409	6.82094	3.55608	0.0593278	0.568836	NA	NA	NA	NA	NA	NA
Rnf19b_RNF19B_Kwon201107_XENLA_00049131	-0.19095	3.49839	3.55606	0.0593283	0.568836	Rnf19b_RNF19B_Kwon201107_XENLA_00049131	PTHR11685:SF5	RING FINGER PROTEIN 19 (DORFIN) (DOUBLE RING-FINGER PROTEIN)	GO SLIM	GO:0019538	protein metabolic process
Dennd4b_DENND4B_Taira201203_XENLA_tissue_00206238	-0.194407	3.23437	3.55591	0.0593339	0.568836	Dennd4b_DENND4B_Taira201203_XENLA_tissue_00206238	PTHR25170:SF3	SUBFAMILY NOT NAMED	GO SLIM	GO:0006139	nucleobase, nucleoside, nucleotide and nucleic acid metabolic process
NA_CDC42EP2_Taira201203_XENLA_stage_00040660	-0.202059	2.87214	3.55354	0.0594186	0.569351	NA	NA	NA	NA	NA	NA
Ppp1r2_PPP1R2_Ismailoglu201203_XENLA_00040133	0.208029	2.56509	3.55207	0.0594712	0.569557	Ppp1r2_PPP1R2_Ismailoglu201203_XENLA_00040133	PTHR12398:SF7	PROTEIN PHOSPHATASE INHIBITOR 2 (IPP-2)	GO SLIM	GO:0005515	protein binding
Apoo_APOO_Taira201203_XENLA_stage_00099079	0.197978	2.97286	3.54838	0.0596035	0.570349	NA	NA	NA	NA	NA	NA
NA_LLGL2_Taira201203_XENLA_tissue_00131730	-0.175516	4.96874	3.54729	0.0596428	0.570349	NA_LLGL2_Taira201203_XENLA_tissue_00131730	PTHR10241	LETHAL(2) GIANT LARVAE PROTEIN	GO SLIM	GO:0007269	neurotransmitter secretion
Cse1l_NM_001092566.1	0.187336	3.96577	3.54717	0.0596472	0.570349	Cse1l_NM_001092566.1	PTHR10997	IMPORTIN-7, 8, 11	GO SLIM	GO:0016787	hydrolase activity
NA_NA_TC436365	0.179545	4.26268	3.54546	0.0597084	0.570637	NA	NA	NA	NA	NA	NA
NA_NM_001092283.1	-0.179052	4.49605	3.54381	0.0597681	0.57091	NA	NA	NA	NA	NA	NA
NA_SEMA6A_Park201106_XENLA_00093441	0.192801	3.37163	3.54188	0.0598377	0.571277	NA_SEMA6A_Park201106_XENLA_00093441	PTHR11036	SEMAPHORIN	GO SLIM	GO:0005515	protein binding
NA_AHNAK_TeperekTkacz201206_XENLA_00076230	0.193296	3.53029	3.54091	0.0598725	0.571312	NA	NA	NA	NA	NA	NA
Psma7_PSMA7_Ismailoglu201203_XENLA_00028413	0.182261	4.13972	3.53792	0.0599807	0.572047	Psma7_PSMA7_Ismailoglu201203_XENLA_00028413	PTHR11599	PROTEASOME SUBUNIT ALPHA/BETA	GO SLIM	GO:0016787	hydrolase activity
NA_PRMT6_Ismailoglu201203_XENLA_00034969	0.201795	2.74858	3.53651	0.0600316	0.572234	NA_PRMT6_Ismailoglu201203_XENLA_00034969	PTHR11006	PROTEIN ARGININE N-METHYLTRANSFERASE	GO SLIM	GO:0008168	methyltransferase activity
A730098P11Rik_MORF4L1_XeXenL6RMv10016144m	0.1733	5.45677	3.53457	0.060102	0.572608	A730098P11Rik_MORF4L1_XeXenL6RMv10016144m	PTHR10880	MORTALITY FACTOR 4-LIKE PROTEIN	GO SLIM	GO:0003676	nucleic acid binding
Zswim5_ZSWIM5_XeXenL6RMv10006416m	0.201553	2.82963	3.53183	0.0602012	0.573039	NA	NA	NA	NA	NA	NA
Pag1_PAG1_Ismailoglu201203_XENLA_00047033	-0.175219	4.96307	3.5316	0.0602097	0.573039	NA	NA	NA	NA	NA	NA
Gli1_GLI1.1_Taira201203_XENLA_stage_00150788	0.208861	2.58007	3.52905	0.0603023	0.573623	Gli1_GLI1.1_Taira201203_XENLA_stage_00150788	PTHR19818	ZINC FINGER PROTEIN ZIC AND GLI	GO SLIM	GO:0003676	nucleic acid binding
NA_NM_001095055.1	0.257355	1.21853	3.52759	0.0603556	0.573783	NA_NM_001095055.1	PTHR24073	FAMILY NOT NAMED	GO SLIM	GO:0003924	GTPase activity
Atn1_ATN1_XeXenL6RMv10031811m	-0.250412	1.31518	3.52377	0.0604949	0.573783	Atn1_ATN1_XeXenL6RMv10031811m	PTHR13859	ATROPHIN-RELATED	GO SLIM	GO:0006928	cell motility
NA_SCLT1_XeXenL6RMv10020639m	-0.177101	4.68861	3.52361	0.0605004	0.573783	NA	NA	NA	NA	NA	NA
Mbd6_NA_XeXenL6RMv10027266m	0.25131	1.16667	3.52321	0.0605151	0.573783	NA	NA	NA	NA	NA	NA
Man2a2_MAN2A2_TC414011	-0.177633	4.55359	3.52308	0.0605199	0.573783	Man2a2_MAN2A2_TC414011	PTHR11607	ALPHA-MANNOSIDASE	GO SLIM	GO:0016787	hydrolase activity
NA_NAP1L4_Taira201203_XENLA_tissue_00109947	0.244667	1.39548	3.52104	0.0605945	0.573783	NA_NAP1L4_Taira201203_XENLA_tissue_00109947	PTHR11875:SF7	NUCLEOSOME ASSEMBLY PROTEIN	GO SLIM	GO:0019208	phosphatase regulator activity
Sidt2_SIDT2_Taira201203_XENLA_stage_00206651	0.175778	4.90236	3.51948	0.0606515	0.573783	NA	NA	NA	NA	NA	NA
Dph1_DPH1_Ismailoglu201203_XENLA_00041724	-0.184421	3.77066	3.51925	0.0606599	0.573783	NA	NA	NA	NA	NA	NA
NA_NM_001095779.1	0.182675	3.97857	3.51863	0.0606825	0.573783	NA	NA	NA	NA	NA	NA
NA_SSFA2_Taira201203_XENLA_stage_00047589	0.174802	4.92465	3.51823	0.0606971	0.573783	NA	NA	NA	NA	NA	NA
Elavl3_NM_001090611.1	-0.184308	3.84536	3.51757	0.0607214	0.573783	Elavl3_NM_001090611.1	PTHR24011:SF55	SUBFAMILY NOT NAMED	GO SLIM	GO:0003676	nucleic acid binding
NA_NA_Ismailoglu201203_XENLA_00021295	0.171401	5.85221	3.51522	0.0608074	0.573783	NA	NA	NA	NA	NA	NA
NA_NM_001091296.1	-0.220619	2.00125	3.51458	0.0608312	0.573783	NA_NM_001091296.1	PTHR12659	RHO-TYPE GTPASE ACTIVATING PROTEIN	GO SLIM	GO:0005083	small GTPase regulator activity
NA_NCAPH_Taira201203_XENLA_stage_00169928	-0.185194	3.71733	3.51407	0.0608499	0.573783	NA	NA	NA	NA	NA	NA
NA_NM_001085833.1	0.218069	2.57697	3.51338	0.0608751	0.573783	NA_NM_001085833.1	PTHR11920	ADENYLATE AND GUANYLATE CYCLASES	GO SLIM	GO:0016829	lyase activity
1700071K01Rik_NM_001086350.1	0.19003	3.49249	3.5127	0.0609001	0.573783	1700071K01Rik_NM_001086350.1	PTHR23222	PROHIBITIN	GO SLIM	GO:0007049	cell cycle
NA_THADA_Quigley201112_XENLA_00119891	-0.246255	1.16699	3.51029	0.0609887	0.573783	NA	NA	NA	NA	NA	NA
Ccdc9_CCDC9_Taira201203_XENLA_stage_00026541	-0.168481	6.60589	3.509	0.0610364	0.573783	NA	NA	NA	NA	NA	NA
NA_SMARCA5_Ismailoglu201203_XENLA_00073603	-0.166867	7.9242	3.5074	0.0610954	0.573783	NA_SMARCA5_Ismailoglu201203_XENLA_00073603	PTHR10799	SWI/SNF-RELATED MATRIX-ASSOCIATED ACTIN-DEPENDENT REGULATOR OF CHROMATIN SUBFAMILY-RELATED	GO SLIM	GO:0003678	DNA helicase activity
Rfwd3_RFWD3_Kwon201107_XENLA_00103682	0.189356	3.41889	3.50719	0.0611029	0.573783	Rfwd3_RFWD3_Kwon201107_XENLA_00103682	PTHR16047	RFWD3 PROTEIN	GO SLIM	GO:0016874	ligase activity
NA_NM_001094119.1	0.173181	5.32944	3.50611	0.0611429	0.573783	NA	NA	NA	NA	NA	NA
NA_BC072382.1	-0.210836	2.42275	3.50545	0.0611672	0.573783	NA_BC072382.1	PTHR12267	RING FINGER PROTEIN 153-RELATED	GO SLIM	GO:0016874	ligase activity
NA_SYNJ1_Ismailoglu201203_XENLA_00033932	-0.195328	3.06011	3.50531	0.0611725	0.573783	NA_SYNJ1_Ismailoglu201203_XENLA_00033932	PTHR11200	INOSITOL 5-PHOSPHATASE	Panther Class	PC00121	hydrolase
Tmem45b_TMEM45B_Ismailoglu201203_XENLA_00033015	0.17677	4.68823	3.50531	0.0611725	0.573783	NA	NA	NA	NA	NA	NA
NA_NM_001096443.1	-0.166648	7.96356	3.50469	0.0611953	0.573783	NA_NM_001096443.1	PTHR14127	APOPTOTIC CHROMATIN CONDENSATION INDUCER IN THE NUCLEUS	GO SLIM	GO:0003676	nucleic acid binding
Cul9_CUL9_Taira201203_XENLA_tissue_00111598	-0.17146	5.55503	3.50452	0.0612015	0.573783	NA	NA	NA	NA	NA	NA
Dtd2_C14ORF126_TeperekTkacz201206_XENLA_00073971	-0.206476	2.53513	3.50418	0.061214	0.573783	Dtd2_C14ORF126_TeperekTkacz201206_XENLA_00073971	PTHR10472	D-TYROSYL-TRNA(TYR) DEACYLASE	GO SLIM	GO:0016787	hydrolase activity
NA_AF061980.1	-0.237359	1.51666	3.50418	0.061214	0.573783	NA_AF061980.1	PTHR12547	CCCH ZINC FINGER/TIS11-RELATED	GO SLIM	GO:0003676	nucleic acid binding
NA_ZC2HC1A_Taira201203_XENLA_stage_00158850	-0.215871	2.16999	3.50383	0.061227	0.573783	NA_ZC2HC1A_Taira201203_XENLA_stage_00158850	PTHR13555:SF3	CGI-62	GO SLIM	GO:0003676	nucleic acid binding
Nfkbil1_NFKBIL1_Taira201203_XENLA_stage_00059744	-0.184059	3.91666	3.503	0.0612577	0.573783	Nfkbil1_NFKBIL1_Taira201203_XENLA_stage_00059744	PTHR15263	I-KAPPA-B-LIKE PROTEIN (IKBL)	GO SLIM	GO:0005515	protein binding
Fasn_FASN_Taira201203_XENLA_stage_00125854	0.18554	3.70593	3.49804	0.0614414	0.574758	Fasn_FASN_Taira201203_XENLA_stage_00125854	PTHR11712:SF5	FATTY ACID SYNTHASE	GO SLIM	GO:0016787	hydrolase activity
Tmbim1_TMBIM1_Quigley201207_XENLA_00106783	-0.191921	3.23861	3.49713	0.0614754	0.574758	Tmbim1_TMBIM1_Quigley201207_XENLA_00106783	PTHR23291:SF18	FAS APOPTOTIC INHIBITORY MOLECULE 2 (LIFEGUARD PROTEIN)	GO SLIM	GO:0006915	apoptosis
Lipg_LIPG_Ismailoglu201203_XENLA_00032391	-0.21408	2.25893	3.49703	0.0614789	0.574758	Lipg_LIPG_Ismailoglu201203_XENLA_00032391	PTHR11610	LIPASE	GO SLIM	GO:0016787	hydrolase activity
Igsf9_IGSF9_Ismailoglu201203_XENLA_00007001	-0.183729	3.82107	3.49681	0.0614872	0.574758	Igsf9_IGSF9_Ismailoglu201203_XENLA_00007001	PTHR10489	CELL ADHESION MOLECULE	GO SLIM	GO:0007154	cell communication
NA_NA_Taira201203_XENLA_tissue_00239066	-0.172752	5.16762	3.49365	0.0616048	0.575404	NA	NA	NA	NA	NA	NA
NA_NM_001095072.1	0.184114	4.04379	3.49242	0.0616503	0.575404	NA	NA	NA	NA	NA	NA
Prkar1b_PRKAR1B_Ismailoglu201203_XENLA_00067569	-0.219731	2.03112	3.49242	0.0616504	0.575404	Prkar1b_PRKAR1B_Ismailoglu201203_XENLA_00067569	PTHR11635:SF17	CAMP-DEPENDENT PROTEIN KINASE TYPE I-BETA REGULATORY SUBUNIT	GO SLIM	GO:0005515	protein binding
NA_GRK5_Taira201203_XENLA_tissue_00154339	-0.173115	5.01697	3.49041	0.0617254	0.57578	NA_GRK5_Taira201203_XENLA_tissue_00154339	PTHR24355	G PROTEIN-COUPLED RECEPTOR KINASE/RIBOSOMAL PROTEIN S6 KINASE	GO SLIM	GO:0016740	transferase activity
NA_THOC7_TeperekTkacz201206_XENLA_00004013	-0.206115	2.54231	3.48965	0.0617535	0.57578	NA	NA	NA	NA	NA	NA
NA_WNK2_Taira201203_XENLA_tissue_00178564	-0.222489	2.04198	3.48696	0.061854	0.576086	NA_WNK2_Taira201203_XENLA_tissue_00178564	PTHR13902:SF10	SERINE/THREONINE-PROTEIN KINASE WNK 2	GO SLIM	GO:0016740	transferase activity
Cog7_NM_001092363.1	-0.233291	1.63546	3.48616	0.0618841	0.576086	NA	NA	NA	NA	NA	NA
NA_TMEM39B_TeperekTkacz201206_XENLA_00056987	-0.178648	4.2992	3.48566	0.0619027	0.576086	NA	NA	NA	NA	NA	NA
Vrk1_VRK1_mgEST_Xl4jul2012_1013088133	0.171587	5.32718	3.48504	0.0619259	0.576086	Vrk1_VRK1_mgEST_Xl4jul2012_1013088133	PTHR11909:SF17	SERINE/THREONINE-PROTEIN KINASE VRK	GO SLIM	GO:0016740	transferase activity
NA_PRC1.2_Ismailoglu201203_XENLA_00040162	0.173448	4.9154	3.48457	0.0619433	0.576086	NA_PRC1.2_Ismailoglu201203_XENLA_00040162	PTHR19321	PROTEIN REGULATOR OF CYTOKINESIS 1 PRC1-RELATED	GO SLIM	GO:0008092	cytoskeletal protein binding
NA_NM_001090615.1	-0.178831	4.16781	3.48071	0.062088	0.577138	NA_NM_001090615.1	PTHR23255	TRANSFORMING GROWTH FACTOR-BETA RECEPTOR TYPE I AND II	GO SLIM	GO:0004675	transmembrane receptor protein serine/threonine kinase activity
NA_CEP41_XeXenL6RMv10055562m	-0.172472	5.12143	3.4792	0.0621448	0.577374	NA	NA	NA	NA	NA	NA
Ism1_ISM1_Park201106_XENLA_00038335	-0.171011	5.69734	3.47731	0.0622159	0.5775	Ism1_ISM1_Park201106_XENLA_00038335	PTHR11036	SEMAPHORIN	GO SLIM	GO:0005515	protein binding
Gid4_C17ORF39_Quigley201207_XENLA_00061638	-0.194605	3.14756	3.47716	0.0622214	0.5775	NA	NA	NA	NA	NA	NA
5830415F09Rik_C9ORF156_Taira201203_XENLA_stage_00209438	-0.172466	5.05128	3.47274	0.0623879	0.578753	NA	NA	NA	NA	NA	NA
Wsb1_NM_001086888.1	0.169268	5.96608	3.47122	0.0624452	0.578992	Wsb1_NM_001086888.1	PTHR15622	WD40 REPEAT PROTEIN	GO SLIM	GO:0007242	intracellular signaling cascade
NA_MPP6_XeXenL6RMv10027935m	-0.178103	4.18999	3.4679	0.0625707	0.579766	NA_MPP6_XeXenL6RMv10027935m	PTHR23122	MEMBRANE-ASSOCIATED GUANYLATE KINASE (MAGUK)	GO SLIM	GO:0016740	transferase activity
NA_ZIC1_mgEST_Xl4jul2012_1013254472	-0.16853	6.37109	3.46734	0.0625919	0.579766	NA_ZIC1_mgEST_Xl4jul2012_1013254472	PTHR19818	ZINC FINGER PROTEIN ZIC AND GLI	GO SLIM	GO:0003676	nucleic acid binding
Emr4_CD97_XeXenL6RMv10051176m	-0.169363	6.19005	3.46644	0.0626259	0.579787	Emr4_CD97_XeXenL6RMv10051176m	PTHR12011	G-PROTEIN COUPLED RECEPTOR	GO SLIM	GO:0004872	receptor activity
NA_BC124885.1	0.171342	5.61056	3.46551	0.0626613	0.579823	NA_BC124885.1	PTHR12365	SPROUTY	GO SLIM	GO:0003676	nucleic acid binding
NA_PTPN23_Kwon201107_XENLA_00111482	-0.200832	2.99165	3.4611	0.0628284	0.580974	NA_PTPN23_Kwon201107_XENLA_00111482	PTHR23030:SF14	SUBFAMILY NOT NAMED	GO SLIM	GO:0006915	apoptosis
Ccdc130_CCDC130_Ismailoglu201203_XENLA_00066710	-0.193052	3.18002	3.4601	0.0628665	0.580974	Ccdc130_CCDC130_Ismailoglu201203_XENLA_00066710	PTHR12111	CELL CYCLE CONTROL PROTEIN CWF16-RELATED	GO SLIM	GO:0031202	RNA splicing factor activity, transesterification mechanism
Trappc5_TRAPPC5_Ismailoglu201203_XENLA_00027729	0.170654	5.87641	3.45909	0.0629048	0.580974	NA	NA	NA	NA	NA	NA
NA_FAM63B_XeXenL6RMv10005885m	0.258594	0.965618	3.45889	0.0629125	0.580974	NA	NA	NA	NA	NA	NA
Dcaf17_DCAF17_Taira201203_XENLA_tissue_00230424	0.194799	3.00277	3.45628	0.0630121	0.581464	NA	NA	NA	NA	NA	NA
Car14_CA14_Ismailoglu201203_XENLA_00030232	0.168372	6.37556	3.45576	0.0630316	0.581464	Car14_CA14_Ismailoglu201203_XENLA_00030232	PTHR18952:SF40	CARBONIC ANHYDRASE 14 PRECURSOR (EC 4.2.1.1)(CARBONIC ANHYDRASE XIV)(CA-XIV)(CAR	GO SLIM	GO:0016829	lyase activity
NA_C11ORF58_TeperekTkacz201202_XENLA_00013604	-0.170757	5.58092	3.455	0.0630606	0.581464	NA	NA	NA	NA	NA	NA
Gm6904_BC155883.1	-0.200876	2.75487	3.45366	0.0631117	0.581583	Gm6904_BC155883.1	PTHR12420	PHD FINGER PROTEIN	GO SLIM	GO:0003676	nucleic acid binding
NA_NA_Taira201203_XENLA_stage_00154286	-0.17015	5.57938	3.453	0.063137	0.581583	NA_NA_Taira201203_XENLA_stage_00154286	PTHR24377	FAMILY NOT NAMED	GO SLIM	GO:0003676	nucleic acid binding
NA_DAND5_XeXenL6RMv10054837m	-0.221428	1.95935	3.4498	0.0632592	0.582417	NA	NA	NA	NA	NA	NA
NA_MYC_XeXenL6RMv10026385m	0.176923	5.06753	3.44436	0.063468	0.584046	NA_MYC_XeXenL6RMv10026385m	PTHR11514	MYC	GO SLIM	GO:0003676	nucleic acid binding
NA_SRPK3_Taira201203_XENLA_tissue_00281428	0.181109	3.86382	3.44337	0.0635061	0.584103	NA_SRPK3_Taira201203_XENLA_tissue_00281428	PTHR24055	MITOGEN-ACTIVATED PROTEIN KINASE	GO SLIM	GO:0016740	transferase activity
Pir_PIR_Ismailoglu201203_XENLA_00024898	-0.202797	2.54373	3.43883	0.0636809	0.585417	Pir_PIR_Ismailoglu201203_XENLA_00024898	PTHR13903	PIRIN-RELATED	GO SLIM	GO:0003676	nucleic acid binding
NA_ECT2_Kwon201107_XENLA_00000759	0.175691	4.53788	3.43533	0.0638159	0.58582	NA_ECT2_Kwon201107_XENLA_00000759	PTHR16777	EPITHELIAL CELL TRANSFORMING-2 (ECT-2)	GO SLIM	GO:0005515	protein binding
NA_SLMAP_Kwon201107_XENLA_00017700	-0.179087	4.10003	3.43519	0.0638213	0.58582	NA	NA	NA	NA	NA	NA
Vezt_VEZT_Taira201203_XENLA_tissue_00260968	0.206168	2.40573	3.43477	0.0638374	0.58582	NA	NA	NA	NA	NA	NA
Insm1_NM_001110719.1	0.204985	3.12374	3.43365	0.0638806	0.58582	Insm1_NM_001110719.1	PTHR15065	INSULINOMA-ASSOCIATED 1	GO SLIM	GO:0006139	nucleobase, nucleoside, nucleotide and nucleic acid metabolic process
[truncated: 16,341 more rows]

## Sheet: Transcripts with FDR<0.05
Transcripts	logFC_Spermatid_Divided_By_Sperm	logCPM	LR	PValue	FDR	ID	FamID	PanFamily	GO	GOID	GODesc
Gjb1_GJB1_TC442449	1.04104	5.56416	108.661	1.92603e-25	3.53234e-21	Gjb1_GJB1_TC442449	PTHR11984:SF20	GAP JUNCTION BETA-1 PROTEIN (CONNEXIN 32)	GO SLIM	GO:0005243	gap junction channel activity
NA_AH010077.2	0.965002	4.39702	79.0175	6.15636e-19	5.64538e-15	NA	NA	NA	NA	NA	NA
NA_PLOD2_Taira201203_XENLA_tissue_00074828	0.875324	4.31994	68.707	1.14233e-16	6.98344e-13	NA_PLOD2_Taira201203_XENLA_tissue_00074828	PTHR10730	PROCOLLAGEN-LYSINE,2-OXOGLUTARATE 5-DIOXYGENASE/GLYCOSYLTRANSFERASE 25 FAMILY MEMBER	GO SLIM	GO:0007155	cell adhesion
NA_CPEB1_XeXenL6RMv10039223m	0.801491	4.45089	47.6336	5.13797e-12	2.35576e-08	NA_CPEB1_XeXenL6RMv10039223m	PTHR12566	CYTOPLASMIC POLYADENYLATION ELEMENT BINDING PROTEIN (CPEB)	GO SLIM	GO:0003676	nucleic acid binding
Cpeb1_CPEB1_TC415268	0.785419	4.61383	45.9907	1.18818e-11	4.35825e-08	Cpeb1_CPEB1_TC415268	PTHR12566	CYTOPLASMIC POLYADENYLATION ELEMENT BINDING PROTEIN (CPEB)	GO SLIM	GO:0003676	nucleic acid binding
NA_SFRP2_Ismailoglu201203_XENLA_00042592	0.627171	4.99587	43.9658	3.34172e-11	1.02145e-07	NA	NA	NA	NA	NA	NA
Car7_CA7_TeperekTkacz201202_XENLA_00075957	0.715593	3.26296	43.5793	4.07123e-11	1.06666e-07	Car7_CA7_TeperekTkacz201202_XENLA_00075957	PTHR18952:SF26	CARBONIC ANHYDRASE VII (CARBONATE DEHYDRATASE VII)	GO SLIM	GO:0016829	lyase activity
NA_BC044072.1	0.730192	3.77243	39.6947	2.9693e-10	6.80712e-07	NA_BC044072.1	PTHR11412:SF36	ALPHA-MACROGLOBULIN	GO SLIM	GO:0004867	serine-type endopeptidase inhibitor activity
Fosl2_FOSL2_Taira201203_XENLA_tissue_00235780	0.663919	3.33399	38.8446	4.58915e-10	8.4331e-07	Fosl2_FOSL2_Taira201203_XENLA_tissue_00235780	PTHR23351	FOS TRANSCRIPTION FACTOR-RELATED	GO SLIM	GO:0003676	nucleic acid binding
Socs3_SOCS3_Taira201203_XENLA_tissue_00286385	0.656792	3.77054	38.8408	4.5982e-10	8.4331e-07	Socs3_SOCS3_Taira201203_XENLA_tissue_00286385	PTHR10385	SUPPRESSOR OF CYTOKINE SIGNALING	GO SLIM	GO:0005125	cytokine activity
NA_FOS_Taira201203_XENLA_tissue_00143512	0.636534	3.53042	38.0677	6.83334e-10	1.1393e-06	NA_FOS_Taira201203_XENLA_tissue_00143512	PTHR23351	FOS TRANSCRIPTION FACTOR-RELATED	GO SLIM	GO:0003676	nucleic acid binding
NA_GJB2_Taira201203_XENLA_stage_00124664	0.553681	6.62328	36.8712	1.26199e-09	1.92874e-06	NA_GJB2_Taira201203_XENLA_stage_00124664	PTHR11984:SF25	GB DEF: GAP JUNCTION BETA-6 PROTEIN (CONNEXIN 31) (CX31)	GO SLIM	GO:0005243	gap junction channel activity
NA_SFRP2_Ismailoglu201203_XENLA_00017150	0.560283	5.47949	36.3948	1.61135e-09	2.27325e-06	NA	NA	NA	NA	NA	NA
NA_C19ORF26_TeperekTkacz201202_XENLA_00119152	-0.652593	2.79179	35.5745	2.45483e-09	3.21582e-06	NA	NA	NA	NA	NA	NA
NA_NT5M_Quigley201207_XENLA_00091072	0.680336	2.51541	35.2719	2.86735e-09	3.50581e-06	NA	NA	NA	NA	NA	NA
NA_NT5M_TeperekTkacz201206_XENLA_00132601	0.708268	2.04457	34.1122	5.20236e-09	5.9632e-06	NA	NA	NA	NA	NA	NA
NA_KRT_TeperekTkacz201206_XENLA_00049303	0.56893	5.99006	33.958	5.6315e-09	6.07539e-06	NA_KRT_TeperekTkacz201206_XENLA_00049303	PTHR23239	INTERMEDIATE FILAMENT	GO SLIM	GO:0005200	structural constituent of cytoskeleton
NA_NDUFA8_Quigley201207_XENLA_00017558	0.638625	2.87207	33.2679	8.0299e-09	7.78981e-06	NA_NDUFA8_Quigley201207_XENLA_00017558	PTHR13344	NADH-UBIQUINONE OXIDOREDUCTASE	GO SLIM	GO:0016491	oxidoreductase activity
Fos_FOS_XeXenL6RMv10027632m	0.594285	3.51266	33.2581	8.07014e-09	7.78981e-06	Fos_FOS_XeXenL6RMv10027632m	PTHR23351	FOS TRANSCRIPTION FACTOR-RELATED	GO SLIM	GO:0003676	nucleic acid binding
Pgam1_NM_001091527.1	0.638421	2.95533	31.6001	1.89419e-08	1.73697e-05	Pgam1_NM_001091527.1	PTHR11931	PHOSPHOGLYCERATE MUTASE	GO SLIM	GO:0016853	isomerase activity
Lamb1_LAMB1_Taira201203_XENLA_stage_00035701	0.525983	5.29125	31.0966	2.45497e-08	2.14401e-05	Lamb1_LAMB1_Taira201203_XENLA_stage_00035701	PTHR24661:SF37	SUBFAMILY NOT NAMED	GO SLIM	GO:0004872	receptor activity
NA_HES1_TC421852	0.653084	2.266	30.638	3.10951e-08	2.5922e-05	NA_HES1_TC421852	PTHR10985	BASIC HELIX-LOOP-HELIX TRANSCRIPTION FACTOR, HES-RELATED	GO SLIM	GO:0003676	nucleic acid binding
Mtap_MTAP_XeXenL6RMv10027314m	0.630379	2.38768	30.1786	3.94036e-08	3.14201e-05	Mtap_MTAP_XeXenL6RMv10027314m	PTHR11904	METHYLTHIOADENOSINE/PURINE NUCLEOSIDE PHOSPHORYLASE	GO SLIM	GO:0016740	transferase activity
NA_B0BMG0_XENTR_Taira201203_XENLA_tissue_00042092	0.636958	2.39941	30.0899	4.12483e-08	3.15206e-05	NA_B0BMG0_XENTR_Taira201203_XENLA_tissue_00042092	PTHR10194	RAS GTPASE-ACTIVATING PROTEINS	GO SLIM	GO:0005083	small GTPase regulator activity
NA_KRT_XeXenL6RMv10001064m	0.544712	4.64586	29.599	5.3131e-08	3.89769e-05	NA_KRT_XeXenL6RMv10001064m	PTHR23239	INTERMEDIATE FILAMENT	GO SLIM	GO:0005200	structural constituent of cytoskeleton
NA_M11940.1	0.563985	4.79926	29.0611	7.01323e-08	4.94702e-05	NA_M11940.1	PTHR23239	INTERMEDIATE FILAMENT	GO SLIM	GO:0005200	structural constituent of cytoskeleton
NA_HES1_Park201106_XENLA_00070357	0.519021	4.44585	28.5072	9.33491e-08	6.34082e-05	NA_HES1_Park201106_XENLA_00070357	PTHR10985	BASIC HELIX-LOOP-HELIX TRANSCRIPTION FACTOR, HES-RELATED	GO SLIM	GO:0003676	nucleic acid binding
NA_NM_001090383.1	0.54787	4.24038	28.0592	1.17658e-07	7.56228e-05	NA_NM_001090383.1	PTHR10129:SF10	TRANSCRIPTION FACTOR MAFB	GO SLIM	GO:0003676	nucleic acid binding
Abcc5_NM_001096615.1	0.727449	1.61641	28.0279	1.19578e-07	7.56228e-05	Abcc5_NM_001096615.1	PTHR25912	FAMILY NOT NAMED	GO SLIM	GO:0006810	transport
NA_NM_001087625.1	-0.490418	5.27495	27.557	1.5253e-07	9.32467e-05	NA	NA	NA	NA	NA	NA
NA_B2RZ03_XENTR_Ismailoglu201203_XENLA_00027801	0.615506	4.48743	27.4717	1.59412e-07	9.43101e-05	NA	NA	NA	NA	NA	NA
NA_NM_001088706.1	0.534561	3.48901	26.9176	2.12317e-07	0.000121684	NA_NM_001088706.1	PTHR10985	BASIC HELIX-LOOP-HELIX TRANSCRIPTION FACTOR, HES-RELATED	GO SLIM	GO:0003676	nucleic acid binding
Hes1_BC054333.1	0.494923	4.65787	26.7785	2.28157e-07	0.0001268	NA	NA	NA	NA	NA	NA
Mmrn2_MMRN2_Taira201203_XENLA_tissue_00243195	0.607017	2.25081	26.2932	2.93321e-07	0.000158221	Mmrn2_MMRN2_Taira201203_XENLA_tissue_00243195	PTHR15427	EMILIN (ELASTIN MICROFIBRIL INTERFACE-LOCATED PROTEIN) (ELASTIN MICROFIBRIL INTERFACER)	GO SLIM	GO:0007155	cell adhesion
NA_GATA3_Taira201203_XENLA_tissue_00212153	0.525062	3.41565	25.4527	4.53359e-07	0.000232585	NA_GATA3_Taira201203_XENLA_tissue_00212153	PTHR10071	TRANSCRIPTION FACTOR GATA (GATA BINDING FACTOR)	GO SLIM	GO:0003676	nucleic acid binding
NA_NA_Taira201203_XENLA_stage_00000768	0.542173	2.92813	25.4392	4.56547e-07	0.000232585	NA	NA	NA	NA	NA	NA
Casp9_NM_001085566.1	0.624214	1.77455	25.128	5.36484e-07	0.000265922	Casp9_NM_001085566.1	PTHR10454:SF19	CASPASE-9	GO SLIM	GO:0016787	hydrolase activity
NA_NA_TC446730	0.553644	2.59875	24.9027	6.02966e-07	0.00029101	NA_NA_TC446730	PTHR12635	RHO-GTPASE-ACTIVATING PROTEIN 6	GO SLIM	GO:0005198	structural molecule activity
NA_NA_Quigley201112_XENLA_00000928	0.490658	4.73184	24.1763	8.79057e-07	0.00040416	NA_NA_Quigley201112_XENLA_00000928	PTHR11610	LIPASE	GO SLIM	GO:0016787	hydrolase activity
NA_SLC23A2_TeperekTkacz201202_XENLA_00117834	0.561869	2.41428	24.171	8.81482e-07	0.00040416	NA_SLC23A2_TeperekTkacz201202_XENLA_00117834	PTHR11119	XANTHINE-URACIL / VITAMIN C PERMEASE FAMILY MEMBER	GO SLIM	GO:0022857	transmembrane transporter activity
Pgam1_PGAM1_Taira201203_XENLA_stage_00074092	0.502878	4.1215	24.044	9.41607e-07	0.000421197	Pgam1_PGAM1_Taira201203_XENLA_stage_00074092	PTHR11931	PHOSPHOGLYCERATE MUTASE	GO SLIM	GO:0016853	isomerase activity
NA_NM_001096070.1	-0.487466	3.71746	23.9778	9.74519e-07	0.00042554	NA_NM_001096070.1	PTHR24377	FAMILY NOT NAMED	GO SLIM	GO:0003676	nucleic acid binding
NA_XB-GENE-5897454_TeperekTkacz201206_XENLA_00013361	0.505853	4.10573	23.846	1.04356e-06	0.000445092	NA_XB-GENE-5897454_TeperekTkacz201206_XENLA_00013361	PTHR11339:SF43	ZONADHESIN	GO SLIM	GO:0009566	fertilization
NA_STMN1_TC434563	0.513215	3.97938	23.596	1.18834e-06	0.000495323	NA_STMN1_TC434563	PTHR10104	STATHMIN	GO SLIM	GO:0007154	cell communication
NA_NM_001089073.1	0.444486	6.01941	23.3364	1.36004e-06	0.000554292	NA_NM_001089073.1	PTHR22972	SERINE/THREONINE PROTEIN KINASE	GO SLIM	GO:0004675	transmembrane receptor protein serine/threonine kinase activity
NA_HES7.1_Taira201203_XENLA_stage_00017246	0.497093	3.35865	22.9084	1.69905e-06	0.000667898	NA_HES7.1_Taira201203_XENLA_stage_00017246	PTHR10985	BASIC HELIX-LOOP-HELIX TRANSCRIPTION FACTOR, HES-RELATED	GO SLIM	GO:0003676	nucleic acid binding
NA_NA_TeperekTkacz201206_XENLA_00127873	0.468281	4.23495	22.8943	1.71162e-06	0.000667898	NA	NA	NA	NA	NA	NA
Agrn_AGRN_Taira201203_XENLA_tissue_00124619	0.543744	2.529	22.7322	1.8622e-06	0.000711514	NA	NA	NA	NA	NA	NA
Cebpa_NM_001091687.1	0.497394	3.6833	22.6049	1.98974e-06	0.000738729	Cebpa_NM_001091687.1	PTHR23334	CCAAT/ENHANCER BINDING PROTEIN	GO SLIM	GO:0003676	nucleic acid binding
NA_NA_Horb201201_XENLA_00161253	0.511624	4.36802	22.5817	2.01398e-06	0.000738729	NA_NA_Horb201201_XENLA_00161253	PTHR11339:SF43	ZONADHESIN	GO SLIM	GO:0009566	fertilization
NA_TRIM71_Ismailoglu201203_XENLA_00058596	0.462478	4.17826	22.3218	2.30579e-06	0.00082918	NA_TRIM71_Ismailoglu201203_XENLA_00058596	PTHR24103:SF5	SUBFAMILY NOT NAMED	GO SLIM	GO:0016874	ligase activity
NA_DARMIN_TeperekTkacz201206_XENLA_00081109	0.444344	5.12447	22.1564	2.51315e-06	0.000885309	NA_DARMIN_TeperekTkacz201206_XENLA_00081109	PTHR11014	PEPTIDASE M20 FAMILY MEMBER	GO SLIM	GO:0016787	hydrolase activity
NA_CD99L2_Taira201203_XENLA_tissue_00249233	-0.453147	4.66519	22.1221	2.55842e-06	0.000885309	NA	NA	NA	NA	NA	NA
Aldh2_ALDH2_Kwon201107_XENLA_00098201	0.529522	2.90447	21.4805	3.57448e-06	0.001214	Aldh2_ALDH2_Kwon201107_XENLA_00098201	PTHR11699	ALDEHYDE DEHYDROGENASE-RELATED	GO SLIM	GO:0016491	oxidoreductase activity
March8_NM_001094772.1	0.42186	6.76222	21.2361	4.06054e-06	0.00135401	March8_NM_001094772.1	PTHR23012:SF7	MEMBRANE ASSOCIATED RING FINGER 1,8	GO SLIM	GO:0016874	ligase activity
Tmem19_TMEM19_Taira201203_XENLA_tissue_00284527	0.57669	1.7303	21.179	4.18317e-06	0.00136999	NA	NA	NA	NA	NA	NA
Clcn2_CLCN2_Taira201203_XENLA_tissue_00146000	0.609314	1.6233	21.0025	4.58685e-06	0.00147584	Clcn2_CLCN2_Taira201203_XENLA_tissue_00146000	PTHR11689	CHLORIDE CHANNEL	GO SLIM	GO:0005216	ion channel activity
Cd99l2_CD99L2_Taira201203_XENLA_tissue_00200688	-0.4368	4.87135	20.9071	4.82113e-06	0.00152447	NA	NA	NA	NA	NA	NA
NA_NM_001092571.1	0.606809	1.3883	20.765	5.19228e-06	0.00161401	NA_NM_001092571.1	PTHR11063	GLUTAMATE SEMIALDEHYDE DEHYDROGENASE	GO SLIM	GO:0016491	oxidoreductase activity
NA_FOSL2_Quigley201112_XENLA_00079851	0.518429	2.42465	20.6141	5.61811e-06	0.00171727	NA_FOSL2_Quigley201112_XENLA_00079851	PTHR23351	FOS TRANSCRIPTION FACTOR-RELATED	GO SLIM	GO:0003676	nucleic acid binding
NA_MN1_Park201106_XENLA_00072263	0.488424	3.14692	20.4436	6.14157e-06	0.0018465	NA	NA	NA	NA	NA	NA
NA_BTG2_Taira201203_XENLA_stage_00047238	0.46096	3.89057	20.3309	6.51391e-06	0.00192686	NA_BTG2_Taira201203_XENLA_stage_00047238	PTHR22978:SF14	BTG FAMILY, MEMBER 2	GO SLIM	GO:0007242	intracellular signaling cascade
Dsel_DSEL_XeXenL6RMv10012021m	0.590202	1.57275	20.2294	6.86888e-06	0.00198991	NA	NA	NA	NA	NA	NA
Gata3_NM_001090866.1	0.470794	3.355	20.2086	6.94408e-06	0.00198991	Gata3_NM_001090866.1	PTHR10071	TRANSCRIPTION FACTOR GATA (GATA BINDING FACTOR)	GO SLIM	GO:0003676	nucleic acid binding
NA_HES1_Quigley201207_XENLA_00083872	0.489541	2.86883	20.0289	7.62816e-06	0.00213365	NA_HES1_Quigley201207_XENLA_00083872	PTHR10985	BASIC HELIX-LOOP-HELIX TRANSCRIPTION FACTOR, HES-RELATED	GO SLIM	GO:0003676	nucleic acid binding
NA_AJ009290.1	0.425412	5.50489	20.0163	7.67834e-06	0.00213365	NA	NA	NA	NA	NA	NA
NA_STX19_Taira201203_XENLA_tissue_00235164	-0.424444	4.48651	19.981	7.82163e-06	0.00214103	NA_STX19_Taira201203_XENLA_tissue_00235164	PTHR19957:SF29	SYNTAXIN-RELATED	GO SLIM	GO:0005515	protein binding
NA_JUND_Taira201203_XENLA_stage_00028201	0.499919	2.67084	19.8273	8.4764e-06	0.00228614	NA_JUND_Taira201203_XENLA_stage_00028201	PTHR11462	JUN TRANSCRIPTION FACTOR-RELATED	GO SLIM	GO:0003676	nucleic acid binding
Sema6a_SEMA6A_Audic201207_XENLA_00002860	0.42106	4.69782	19.7807	8.68556e-06	0.0023086	Sema6a_SEMA6A_Audic201207_XENLA_00002860	PTHR11036	SEMAPHORIN	GO SLIM	GO:0005515	protein binding
Rbl2_RBL2_Taira201203_XENLA_tissue_00253571	0.457904	3.84411	19.6224	9.43545e-06	0.00244406	Rbl2_RBL2_Taira201203_XENLA_tissue_00253571	PTHR13742:SF8	RETINOBLASTOMA-LIKE PROTEIN 2 (130 KDA RETINOBLASTOMA-ASSOCIATED PROTEIN) (P130) (RBR-2)	GO SLIM	GO:0003676	nucleic acid binding
NA_NM_001130950.1	0.406315	5.8041	19.6171	9.46174e-06	0.00244406	NA_NM_001130950.1	PTHR19143:SF51	SUBFAMILY NOT NAMED	GO SLIM	GO:0005515	protein binding
NA_CER1_Taira201203_XENLA_stage_00197476	0.416191	6.04437	19.5878	9.60832e-06	0.00244745	NA	NA	NA	NA	NA	NA
NA_AY757358.1	0.494881	2.74577	19.5037	1.00407e-05	0.00252254	NA_AY757358.1	PTHR24329:SF72	SUBFAMILY NOT NAMED	GO SLIM	GO:0003676	nucleic acid binding
NA_NM_001090691.1	0.40934	5.31657	19.4691	1.02242e-05	0.00252762	NA	NA	NA	NA	NA	NA
NA_NM_001091189.1	-0.408858	5.10873	19.4319	1.04252e-05	0.00252762	NA_NM_001091189.1	PTHR19957:SF29	SYNTAXIN-RELATED	GO SLIM	GO:0005515	protein binding
NA_DQ096859.1	0.45098	3.87374	19.4229	1.04743e-05	0.00252762	NA_DQ096859.1	PTHR22978:SF14	BTG FAMILY, MEMBER 2	GO SLIM	GO:0007242	intracellular signaling cascade
NA_BC087499.1	0.449559	3.8725	19.2973	1.11866e-05	0.00266443	NA_BC087499.1	PTHR22978:SF14	BTG FAMILY, MEMBER 2	GO SLIM	GO:0007242	intracellular signaling cascade
NA_SOX21_Taira201203_XENLA_tissue_00192034	-0.493086	2.61356	19.183	1.18769e-05	0.0027926	NA_SOX21_Taira201203_XENLA_tissue_00192034	PTHR10270	SOX TRANSCRIPTION FACTOR	GO SLIM	GO:0003676	nucleic acid binding
NA_SZL_XeXenL6RMv10032241m	-0.424337	4.55791	19.0333	1.2846e-05	0.00298222	NA_SZL_XeXenL6RMv10032241m	PTHR11309:SF11	SECRETED XWNT8 INHIBITOR SIZZLED-RELATED	GO SLIM	GO:0005515	protein binding
NA_NM_001088556.1	0.401171	5.78407	18.9653	1.33118e-05	0.00305173	NA_NM_001088556.1	PTHR11309:SF12	WNT INHIBITOR FRZB2	GO SLIM	GO:0005515	protein binding
NA_BC099357.1	-0.453912	3.02845	18.8843	1.38892e-05	0.00314479	NA	NA	NA	NA	NA	NA
NA_TES_XeXenL6RMv10000623m	0.560288	1.46597	18.842	1.42002e-05	0.00317599	NA	NA	NA	NA	NA	NA
Tbx3_NM_001087933.1	0.501057	2.6305	18.8013	1.45069e-05	0.00320551	Tbx3_NM_001087933.1	PTHR11267	T-BOX PROTEIN-RELATED	GO SLIM	GO:0003676	nucleic acid binding
Lama1_LAMA1_Amin201106_XENLA_00003444	0.49158	2.89299	18.7465	1.49294e-05	0.00325958	NA	NA	NA	NA	NA	NA
NA_NM_001086806.1	0.423195	4.1625	18.696	1.53305e-05	0.00330779	NA_NM_001086806.1	PTHR23334	CCAAT/ENHANCER BINDING PROTEIN	GO SLIM	GO:0003676	nucleic acid binding
NA_XB-GENE-5895314_Taira201203_XENLA_stage_00007898	-0.423342	4.18625	18.6354	1.58251e-05	0.0033748	NA_XB-GENE-5895314_Taira201203_XENLA_stage_00007898	PTHR24103:SF74	SUBFAMILY NOT NAMED	GO SLIM	GO:0016874	ligase activity
NA_AY112700.1	-0.4263	3.78004	18.5831	1.62654e-05	0.00342883	NA_AY112700.1	PTHR10605	HEPARAN SULFATE 3-O SULFOTRANSFERASE	GO SLIM	GO:0016740	transferase activity
NA_NIF_Taira201203_XENLA_stage_00073688	-0.452651	3.23561	18.5557	1.65009e-05	0.00343894	NA_NIF_Taira201203_XENLA_stage_00073688	PTHR23239	INTERMEDIATE FILAMENT	GO SLIM	GO:0005200	structural constituent of cytoskeleton
NA_BC130190.1	0.498576	2.39462	18.4531	1.7414e-05	0.00358846	NA	NA	NA	NA	NA	NA
NA_DEDD2_Quigley201112_XENLA_00039209	0.545874	1.47891	18.4299	1.76269e-05	0.00359198	NA	NA	NA	NA	NA	NA
NA_FOSL2_Kwon201107_XENLA_00078674	0.49504	2.53765	18.3146	1.87265e-05	0.00377411	NA_FOSL2_Kwon201107_XENLA_00078674	PTHR23351	FOS TRANSCRIPTION FACTOR-RELATED	GO SLIM	GO:0003676	nucleic acid binding
NA_DHH_Ismailoglu201203_XENLA_00066372	0.452883	3.02472	18.0688	2.13069e-05	0.00424749	NA_DHH_Ismailoglu201203_XENLA_00066372	PTHR11889	HEDGEHOG	GO SLIM	GO:0016787	hydrolase activity
NA_NDUFA8_Ismailoglu201203_XENLA_00021702	0.41635	4.29691	17.9148	2.31022e-05	0.00455585	NA_NDUFA8_Ismailoglu201203_XENLA_00021702	PTHR13344	NADH-UBIQUINONE OXIDOREDUCTASE	GO SLIM	GO:0016491	oxidoreductase activity
Psat1_PSAT1_Taira201203_XENLA_stage_00185773	0.481766	2.50875	17.8921	2.33794e-05	0.00456148	Psat1_PSAT1_Taira201203_XENLA_stage_00185773	PTHR21152:SF1	PHOSPHOSERINE AMINOTRANSFERASE	GO SLIM	GO:0008483	transaminase activity
Stmn1_NM_001087203.1	0.434435	4.42868	17.8247	2.42224e-05	0.00467619	Stmn1_NM_001087203.1	PTHR10104	STATHMIN	GO SLIM	GO:0007154	cell communication
NA_BC041714.1	0.413249	4.12429	17.7534	2.51471e-05	0.00480414	NA_BC041714.1	PTHR23334	CCAAT/ENHANCER BINDING PROTEIN	GO SLIM	GO:0003676	nucleic acid binding
Pik3r3_PIK3R3_Taira201203_XENLA_stage_00143968	0.41308	4.152	17.6983	2.5886e-05	0.00489433	Pik3r3_PIK3R3_Taira201203_XENLA_stage_00143968	PTHR10155	PHOSPHATIDYLINOSITOL 3-KINASE REGULATORY SUBUNIT	GO SLIM	GO:0005515	protein binding
Hs3st1_HS3ST1_Taira201203_XENLA_stage_00203768	-0.418801	3.63862	17.6622	2.63815e-05	0.0049371	Hs3st1_HS3ST1_Taira201203_XENLA_stage_00203768	PTHR10605	HEPARAN SULFATE 3-O SULFOTRANSFERASE	GO SLIM	GO:0016740	transferase activity
Plaur_PLAUR_Taira201203_XENLA_tissue_00281787	0.428609	3.90961	17.5953	2.7327e-05	0.00506239	NA	NA	NA	NA	NA	NA
Abcc5_NP_001096447.1_Taira201203_XENLA_tissue_00163778	0.491586	2.58468	17.5726	2.76539e-05	0.00507173	Abcc5_NP_001096447.1_Taira201203_XENLA_tissue_00163778	PTHR24223:SF10	SUBFAMILY NOT NAMED	GO SLIM	GO:0016787	hydrolase activity
NA_OTX2_XeXenL6RMv10009265m	0.387252	5.50605	17.5472	2.8027e-05	0.00508925	NA	NA	NA	NA	NA	NA
NA_MARCH8_Ismailoglu201203_XENLA_00024521	0.380829	7.24948	17.5245	2.83626e-05	0.00509971	NA_MARCH8_Ismailoglu201203_XENLA_00024521	PTHR23012:SF7	MEMBRANE ASSOCIATED RING FINGER 1,8	GO SLIM	GO:0016874	ligase activity
Fam83b_FAM83B_Taira201203_XENLA_tissue_00190021	-0.401331	4.2896	17.5007	2.87196e-05	0.00511376	NA	NA	NA	NA	NA	NA
NA_NA_Taira201203_XENLA_stage_00119658	0.392972	5.19588	17.4159	3.00305e-05	0.00527847	NA	NA	NA	NA	NA	NA
Plbd2_PLBD2_Taira201203_XENLA_tissue_00238408	0.442054	2.99987	17.4039	3.02203e-05	0.00527847	NA	NA	NA	NA	NA	NA
NA_MARCH8_Taira201203_XENLA_tissue_00292001	0.380533	6.82092	17.3675	3.08052e-05	0.00532989	NA_MARCH8_Taira201203_XENLA_tissue_00292001	PTHR23012:SF7	MEMBRANE ASSOCIATED RING FINGER 1,8	GO SLIM	GO:0016874	ligase activity
NA_HAO1_Ismailoglu201203_XENLA_00048104	0.390785	5.24597	17.318	3.16183e-05	0.00541943	NA_HAO1_Ismailoglu201203_XENLA_00048104	PTHR10578	(S)-2-HYDROXY-ACID OXIDASE-RELATED	GO SLIM	GO:0016874	ligase activity
Mafb_MAFB_Taira201203_XENLA_tissue_00222808	0.451383	3.35228	17.2514	3.27453e-05	0.00556064	Mafb_MAFB_Taira201203_XENLA_tissue_00222808	PTHR10129:SF10	TRANSCRIPTION FACTOR MAFB	GO SLIM	GO:0003676	nucleic acid binding
Slc7a5_NM_001090065.1	0.441034	3.60731	17.0858	3.57293e-05	0.00601169	Slc7a5_NM_001090065.1	PTHR11785:SF74	CATIONIC AMINO ACID TRANSPORTER SLC7A11	GO SLIM	GO:0022857	transmembrane transporter activity
Lrrc40_LRRC40_Taira201203_XENLA_tissue_00148197	0.50372	2.15996	16.9552	3.82716e-05	0.00638093	Lrrc40_LRRC40_Taira201203_XENLA_tissue_00148197	PTHR23155:SF28	LEUCINE-RICH REPEAT-CONTAINING PROTEIN	GO SLIM	GO:0002376	immune system process
Gch1_GCH1_Taira201203_XENLA_tissue_00127764	0.550784	1.34957	16.7987	4.1561e-05	0.00686692	Gch1_GCH1_Taira201203_XENLA_tissue_00127764	PTHR11109	GTP CYCLOHYDROLASE I	GO SLIM	GO:0016787	hydrolase activity
NA_NF1_XeXenL6RMv10010215m	0.503264	1.60908	16.6967	4.38564e-05	0.00718149	NA_NF1_XeXenL6RMv10010215m	PTHR10194	RAS GTPASE-ACTIVATING PROTEINS	GO SLIM	GO:0005083	small GTPase regulator activity
NA_D31760.1	0.483384	2.06946	16.5418	4.75896e-05	0.00772384	NA_D31760.1	PTHR26391	FAMILY NOT NAMED	GO SLIM	GO:0016740	transferase activity
Cdkn1a_NM_001094464.1	0.46285	2.66668	16.4157	5.08628e-05	0.00807911	Cdkn1a_NM_001094464.1	PTHR10265	CYCLIN-DEPENDENT KINASE INHIBITOR 1	GO SLIM	GO:0019210	kinase inhibitor activity
NA_SLC13A3_Taira201203_XENLA_stage_00156612	0.446531	2.73295	16.4089	5.10457e-05	0.00807911	NA_SLC13A3_Taira201203_XENLA_stage_00156612	PTHR10283	SOLUTE CARRIER FAMILY 13 MEMBER	GO SLIM	GO:0022857	transmembrane transporter activity
NA_BC068970.1	0.368823	7.09411	16.4069	5.11002e-05	0.00807911	NA_BC068970.1	PTHR10812	TRANSCRIPTION FACTOR AP-2	GO SLIM	GO:0003676	nucleic acid binding
NA_STMN1_Taira201203_XENLA_tissue_00041903	0.433751	3.47553	16.3483	5.27047e-05	0.00826158	NA_STMN1_Taira201203_XENLA_tissue_00041903	PTHR10104	STATHMIN	GO SLIM	GO:0007154	cell communication
Klhl24_KLHL24_Kwon201107_XENLA_00111234	-0.439759	2.66301	16.2546	5.53745e-05	0.00860651	NA	NA	NA	NA	NA	NA
NA_CHD3_Ismailoglu201203_XENLA_00000455	-0.362271	7.04867	16.2161	5.65119e-05	0.00870948	NA_CHD3_Ismailoglu201203_XENLA_00000455	PTHR10799	SWI/SNF-RELATED MATRIX-ASSOCIATED ACTIN-DEPENDENT REGULATOR OF CHROMATIN SUBFAMILY-RELATED	GO SLIM	GO:0003678	DNA helicase activity
NA_NCEH1_Park201106_XENLA_00123845	-0.513361	2.10772	16.1908	5.7272e-05	0.00875308	NA	NA	NA	NA	NA	NA
NA_NA_Taira201203_XENLA_stage_00029115	0.372535	5.57501	16.0901	6.03989e-05	0.00915468	NA_NA_Taira201203_XENLA_stage_00029115	PTHR15282	POTASSIUM VOLTAGE-GATED CHANNEL SUBFAMILY E MEMBER 1, 3	GO SLIM	GO:0005261	cation channel activity
NA_AF549892.1	0.39497	4.06585	16.0711	6.1009e-05	0.00917136	NA	NA	NA	NA	NA	NA
NA_LFNG_Audic201207_XENLA_00002214	0.377136	4.75654	15.9987	6.33858e-05	0.00945118	NA_LFNG_Audic201207_XENLA_00002214	PTHR10811	FRINGE-RELATED	GO SLIM	GO:0016740	transferase activity
Txndc9_TXNDC9_TeperekTkacz201202_XENLA_00124375	0.399793	3.83839	15.9692	6.43812e-05	0.00952218	Txndc9_TXNDC9_TeperekTkacz201202_XENLA_00124375	PTHR21148:SF11	THIOREDOXIN DOMAIN CONTAINING PROTEIN 9-RELATED	GO SLIM	GO:0007067	mitosis
Nt5c3_NM_001094563.1	0.429914	3.19882	15.9378	6.54592e-05	0.00960417	Nt5c3_NM_001094563.1	PTHR13045	NT5C3 HYDROLASE	GO SLIM	GO:0016787	hydrolase activity
Olfm4_OLFM4_Quigley201112_XENLA_00066091	0.389248	4.09799	15.836	6.90769e-05	0.0100545	Olfm4_OLFM4_Quigley201112_XENLA_00066091	PTHR23192:SF7	TIARIN	GO SLIM	GO:0004872	receptor activity
NA_ROBO3_Taira201203_XENLA_tissue_00093443	0.456192	2.30369	15.7126	7.37304e-05	0.0105533	NA_ROBO3_Taira201203_XENLA_tissue_00093443	PTHR10489	CELL ADHESION MOLECULE	GO SLIM	GO:0007154	cell communication
NA_RHOG.2_Ismailoglu201203_XENLA_00028496	0.403075	3.35181	15.7031	7.41038e-05	0.0105533	NA	NA	NA	NA	NA	NA
Pkdcc_PKDCC.2_Quigley201112_XENLA_00017357	0.404944	3.68527	15.6874	7.4719e-05	0.0105533	NA	NA	NA	NA	NA	NA
NA_BC077870.1	0.478882	2.40521	15.6853	7.48052e-05	0.0105533	NA_BC077870.1	PTHR10201	MATRIX METALLOPROTEINASE	GO SLIM	GO:0016787	hydrolase activity
NA_MN1_XeXenL6RMv10006960m	0.414262	3.38927	15.6646	7.56281e-05	0.0105879	NA	NA	NA	NA	NA	NA
NA_BLVRB_Taira201203_XENLA_stage_00169730	0.494979	2.06323	15.6013	7.81998e-05	0.010865	NA_BLVRB_Taira201203_XENLA_stage_00169730	PTHR15020:SF8	FLAVIN REDUCTASE (NADPH-DEPENDENT DIAPHORASE)	GO SLIM	GO:0016491	oxidoreductase activity
Foxa2_FOXA2_Quigley201112_XENLA_00082222	0.376768	4.739	15.4146	8.63201e-05	0.0119031	Foxa2_FOXA2_Quigley201112_XENLA_00082222	PTHR11829	FAMILY NOT NAMED	GO SLIM	GO:0003676	nucleic acid binding
Sh2d3c_NM_001086827.1	-0.385953	3.8145	15.3635	8.8683e-05	0.0121184	Sh2d3c_NM_001086827.1	PTHR14247:SF6	SUBFAMILY NOT NAMED	GO SLIM	GO:0007154	cell communication
NA_AJ009291.1	0.390204	4.53086	15.3364	8.99645e-05	0.0121184	NA	NA	NA	NA	NA	NA
NA_BC092021.1	0.445052	2.62326	15.323	9.06078e-05	0.0121184	NA_BC092021.1	PTHR11848	TGF-BETA FAMILY	GO SLIM	GO:0005515	protein binding
NA_FAM46C_XeXenL6RMv10040501m	-0.351525	7.03329	15.3214	9.06821e-05	0.0121184	NA	NA	NA	NA	NA	NA
NA_MARS2_Horb201201_XENLA_00089909	0.355347	7.42457	15.311	9.11856e-05	0.0121184	NA_MARS2_Horb201201_XENLA_00089909	PTHR11946	ISOLEUCYL, LEUCYL, TYROSYL, VALYL AND METHIONYL-TRNA SYNTHETASES	GO SLIM	GO:0016874	ligase activity
NA_FRZB2_Ismailoglu201203_XENLA_00013289	0.405487	3.53275	15.2929	9.20601e-05	0.0121466	NA_FRZB2_Ismailoglu201203_XENLA_00013289	PTHR11309:SF12	WNT INHIBITOR FRZB2	GO SLIM	GO:0005515	protein binding
NA_BIX1.2_TC420565	-0.405383	3.46844	15.252	9.40793e-05	0.0123051	NA_BIX1.2_TC420565	PTHR24326:SF76	SUBFAMILY NOT NAMED	GO SLIM	GO:0003676	nucleic acid binding
Alg2_ALG2_Audic201207_XENLA_00001739	0.378361	4.07301	15.2415	9.46031e-05	0.0123051	Alg2_ALG2_Audic201207_XENLA_00001739	PTHR12526:SF22	ALPHA-1,3-MANNOSYLTRANSFERASE	GO SLIM	GO:0016740	transferase activity
Fat1_FAT1_Taira201203_XENLA_tissue_00017935	0.364714	5.05696	15.2106	9.61619e-05	0.0124198	Fat1_FAT1_Taira201203_XENLA_tissue_00017935	PTHR24027:SF76	SUBFAMILY NOT NAMED	GO SLIM	GO:0005509	calcium ion binding
NA_NA_Taira201203_XENLA_stage_00034511	0.391984	3.54813	15.1844	9.75062e-05	0.0125053	NA_NA_Taira201203_XENLA_stage_00034511	PTHR12635	RHO-GTPASE-ACTIVATING PROTEIN 6	GO SLIM	GO:0005198	structural molecule activity
Gata2_NM_001090574.1	0.352323	7.03556	15.1046	0.000101715	0.0129069	Gata2_NM_001090574.1	PTHR10071	TRANSCRIPTION FACTOR GATA (GATA BINDING FACTOR)	GO SLIM	GO:0003676	nucleic acid binding
NA_NA_XeXenL6RMv10031513m	0.460827	2.185	15.0985	0.000102045	0.0129069	NA_NA_XeXenL6RMv10031513m	PTHR14453	PARP/ZINC FINGER CCCH TYPE DOMAIN CONTAINING PROTEIN	GO SLIM	GO:0003676	nucleic acid binding
BC034090_KIAA1614_Taira201203_XENLA_tissue_00286533	0.433814	2.8721	15.045	0.000104978	0.013088	BC034090_KIAA1614_Taira201203_XENLA_tissue_00286533	PTHR17130:SF7	SYNAPTOJANIN 2 BINDING PROTEIN	GO SLIM	GO:0007165	signal transduction
NA_BMP7.1_XeXenL6RMv10005646m	0.490563	2.09312	15.0392	0.0001053	0.013088	NA_BMP7.1_XeXenL6RMv10005646m	PTHR11848	TGF-BETA FAMILY	GO SLIM	GO:0005515	protein binding
NA_NM_001095695.1	0.484633	2.12584	15.0335	0.000105617	0.013088	NA	NA	NA	NA	NA	NA
NA_PDLIM5_Taira201203_XENLA_tissue_00182959	0.538131	1.34779	14.998	0.000107626	0.0132474	NA_PDLIM5_Taira201203_XENLA_tissue_00182959	PTHR24214	FAMILY NOT NAMED	GO SLIM	GO:0005198	structural molecule activity
NA_SOX21_TeperekTkacz201206_XENLA_00125571	-0.486311	1.74805	14.9448	0.000110701	0.0133338	NA_SOX21_TeperekTkacz201206_XENLA_00125571	PTHR10270	SOX TRANSCRIPTION FACTOR	GO SLIM	GO:0003676	nucleic acid binding
Dscaml1_DSCAML1_TeperekTkacz201202_XENLA_00112016	0.365104	5.60032	14.944	0.000110751	0.0133338	Dscaml1_DSCAML1_TeperekTkacz201202_XENLA_00112016	PTHR10489	CELL ADHESION MOLECULE	GO SLIM	GO:0007154	cell communication
Dhh_DHH_Taira201203_XENLA_tissue_00262576	0.42214	2.79709	14.9431	0.000110805	0.0133338	Dhh_DHH_Taira201203_XENLA_tissue_00262576	PTHR11889	HEDGEHOG	GO SLIM	GO:0016787	hydrolase activity
NA_NM_001086215.1	0.398711	3.26902	14.9357	0.000111236	0.0133338	NA_NM_001086215.1	PTHR19325:SF165	SUBFAMILY NOT NAMED	GO SLIM	GO:0050896	response to stimulus
NA_C11ORF2_TC415679	0.385258	3.79229	14.9118	0.000112654	0.0133604	NA	NA	NA	NA	NA	NA
NA_PKDCC.2_Ismailoglu201203_XENLA_00003533	0.368771	4.74234	14.9075	0.000112915	0.0133604	NA	NA	NA	NA	NA	NA
NA_SZL_Taira201203_XENLA_stage_00127515	-0.400859	3.62881	14.8648	0.0001155	0.0135787	NA_SZL_Taira201203_XENLA_stage_00127515	PTHR11309:SF11	SECRETED XWNT8 INHIBITOR SIZZLED-RELATED	GO SLIM	GO:0005515	protein binding
Rnd3_NM_001091085.1	0.400142	3.74252	14.8465	0.000116626	0.0136211	NA	NA	NA	NA	NA	NA
NA_C6ORF47_Kwon201107_XENLA_00076346	0.383642	3.77244	14.8236	0.000118051	0.0136211	NA	NA	NA	NA	NA	NA
NA_NR1H2_Amin201106_XENLA_00091994	0.462989	1.88968	14.8172	0.000118449	0.0136211	NA	NA	NA	NA	NA	NA
Ccdc158_CCDC158_Kwon201107_XENLA_00069282	-0.367643	4.30019	14.8111	0.000118832	0.0136211	NA	NA	NA	NA	NA	NA
NA_COQ10B_Taira201203_XENLA_tissue_00243318	0.369417	4.70635	14.6617	0.000128636	0.0146534	NA_COQ10B_Taira201203_XENLA_tissue_00243318	PTHR12901	SPERM PROTEIN HOMOLOG	GO SLIM	GO:0003824	catalytic activity
Arrdc3_ARRDC3_Park201106_XENLA_00079969	0.394503	3.30965	14.632	0.000130674	0.0147936	NA	NA	NA	NA	NA	NA
Chst3_CHST3_Taira201203_XENLA_stage_00047275	0.465258	2.20656	14.5618	0.000135635	0.0152546	Chst3_CHST3_Taira201203_XENLA_stage_00047275	PTHR10704	CARBOHYDRATE SULFOTRANSFERASE	GO SLIM	GO:0016740	transferase activity
2700049A03Rik_KIAA0586_XeXenL6RMv10030176m	-0.380092	3.64064	14.5474	0.000136677	0.0152546	NA	NA	NA	NA	NA	NA
Junb_NM_001091590.1	0.424702	3.10477	14.5342	0.000137635	0.0152546	Junb_NM_001091590.1	PTHR11462	JUN TRANSCRIPTION FACTOR-RELATED	GO SLIM	GO:0003676	nucleic acid binding
NA_FAM13A_Kwon201107_XENLA_00073252	0.40038	3.1974	14.5283	0.000138073	0.0152546	NA	NA	NA	NA	NA	NA
NA_NA_TeperekTkacz201206_XENLA_00078478	0.435893	4.15953	14.4391	0.000144767	0.0158983	NA_NA_TeperekTkacz201206_XENLA_00078478	PTHR10177	CYCLINE	GO SLIM	GO:0005515	protein binding
Tgfbr1_TGFBR1_Taira201203_XENLA_tissue_00165929	0.447951	1.99515	14.234	0.000161424	0.0175653	Tgfbr1_TGFBR1_Taira201203_XENLA_tissue_00165929	PTHR23255	TRANSFORMING GROWTH FACTOR-BETA RECEPTOR TYPE I AND II	GO SLIM	GO:0004675	transmembrane receptor protein serine/threonine kinase activity
NA_ALDH18A1_Kwon201107_XENLA_00076166	0.505366	1.3841	14.2289	0.000161861	0.0175653	NA_ALDH18A1_Kwon201107_XENLA_00076166	PTHR11063	GLUTAMATE SEMIALDEHYDE DEHYDROGENASE	GO SLIM	GO:0016491	oxidoreductase activity
NA_NA_Taira201203_XENLA_stage_00052262	0.347502	5.47179	14.2144	0.000163114	0.0175971	NA_NA_Taira201203_XENLA_stage_00052262	PTHR10579	CALCIUM-ACTIVATED CHLORIDE CHANNEL REGULATOR	GO SLIM	GO:0005216	ion channel activity
NA_NM_001092518.1	0.411784	2.81584	14.1713	0.000166901	0.0179004	NA_NM_001092518.1	PTHR11353	CHAPERONIN	GO SLIM	GO:0019538	protein metabolic process
Dusp1_DUSP1_XeXenL6RMv10033068m	-0.352554	4.90833	14.1383	0.000169847	0.0181105	Dusp1_DUSP1_XeXenL6RMv10033068m	PTHR10159	DUAL SPECIFICITY PROTEIN PHOSPHATASE	GO SLIM	GO:0016787	hydrolase activity
Trib1_BC073316.1	-0.425806	2.46266	14.0834	0.000174878	0.0185391	Trib1_BC073316.1	PTHR22961	SER/THR PROTEIN KINASE-TRB	GO SLIM	GO:0016740	transferase activity
NA_NA_Kwon201107_XENLA_00014113	0.338555	6.90839	14.0669	0.000176419	0.018595	NA_NA_Kwon201107_XENLA_00014113	PTHR19143:SF51	SUBFAMILY NOT NAMED	GO SLIM	GO:0005515	protein binding
NA_COQ10B_TC448540	0.369225	4.21678	14.0299	0.000179924	0.0188477	NA_COQ10B_TC448540	PTHR12901	SPERM PROTEIN HOMOLOG	GO SLIM	GO:0003824	catalytic activity
Ghitm_GHITM_TC429572	0.381502	3.36577	14.02	0.000180872	0.0188477	Ghitm_GHITM_TC429572	PTHR23291:SF1	GROWTH HORMONE INDUCIBLE TRANSMEMBRANE PROTEIN	GO SLIM	GO:0006915	apoptosis
NA_CHRD_Veenstra201204_XENLA_00009947	0.373586	3.79867	13.986	0.000184173	0.0190833	NA	NA	NA	NA	NA	NA
NA_CKAP2_Taira201203_XENLA_stage_00070693	0.348967	5.67037	13.9405	0.000188684	0.0194408	NA_CKAP2_Taira201203_XENLA_stage_00070693	PTHR16076:SF4	CYTOSKELETON ASSOCIATED PROTEIN 2	GO SLIM	GO:0005200	structural constituent of cytoskeleton
NA_DQ096951.1	0.37648	3.90447	13.893	0.000193521	0.0198278	NA	NA	NA	NA	NA	NA
NA_PDLIM5_Taira201203_XENLA_tissue_00158556	0.407184	2.9325	13.8332	0.000199777	0.0203551	NA_PDLIM5_Taira201203_XENLA_tissue_00158556	PTHR24214	FAMILY NOT NAMED	GO SLIM	GO:0005198	structural molecule activity
NA_NM_001095973.1	0.374039	3.85343	13.7833	0.000205152	0.0207872	NA	NA	NA	NA	NA	NA
Sebox_SEBOX_XeXenL6RMv10046875m	-0.358648	4.06499	13.6569	0.00021943	0.0221118	Sebox_SEBOX_XeXenL6RMv10046875m	PTHR24329:SF93	SUBFAMILY NOT NAMED	GO SLIM	GO:0003676	nucleic acid binding
NA_DSEL_Kwon201107_XENLA_00003761	0.443665	2.14236	13.5692	0.000229926	0.0230429	NA	NA	NA	NA	NA	NA
Hao1_BC146639.1	0.339917	5.77683	13.5499	0.000232299	0.0230749	Hao1_BC146639.1	PTHR10578	(S)-2-HYDROXY-ACID OXIDASE-RELATED	GO SLIM	GO:0016874	ligase activity
NA_AY727861.1	0.348014	4.97899	13.5462	0.000232762	0.0230749	NA_AY727861.1	PTHR11819	SODIUM/SOLUTE SYMPORTER	GO SLIM	GO:0022857	transmembrane transporter activity
NA_ANKRD57_Taira201203_XENLA_tissue_00275092	0.420207	2.55782	13.5241	0.000235514	0.0232222	NA	NA	NA	NA	NA	NA
NA_NA_Taira201203_XENLA_tissue_00047970	0.408515	2.82472	13.4569	0.000244101	0.0239402	NA_NA_Taira201203_XENLA_tissue_00047970	PTHR11465	CATALASE	GO SLIM	GO:0004601	peroxidase activity
Ulk1_ULK1_Kwon201107_XENLA_00010325	0.368415	3.67536	13.3994	0.000251708	0.0245549	NA	NA	NA	NA	NA	NA
Nedd4l_NM_001090789.1	-0.436319	1.99461	13.3341	0.000260617	0.0252895	Nedd4l_NM_001090789.1	PTHR11254	HECT DOMAIN UBIQUITIN-PROTEIN LIGASE	GO SLIM	GO:0016874	ligase activity
NA_SPHK2_Taira201203_XENLA_stage_00058096	0.458864	1.48343	13.2845	0.000267607	0.025748	NA_SPHK2_Taira201203_XENLA_stage_00058096	PTHR12358	SPHINGOSINE KINASE	GO SLIM	GO:0019200	carbohydrate kinase activity
NA_RALGDS_Taira201203_XENLA_tissue_00231633	0.368201	3.71695	13.2807	0.00026815	0.025748	NA_RALGDS_Taira201203_XENLA_tissue_00231633	PTHR23113:SF35	RAL GUANINE NUCLEOTIDE DISSOCIATION STIMULATOR, RALGDS	GO SLIM	GO:0005083	small GTPase regulator activity
Prkg2_PRKG2_Taira201203_XENLA_tissue_00248163	0.387944	3.27072	13.2618	0.000270864	0.0258732	Prkg2_PRKG2_Taira201203_XENLA_tissue_00248163	PTHR24353	CYCLIC NUCLEOTIDE-DEPENDENT PROTEIN KINASE	GO SLIM	GO:0016740	transferase activity
NA_CHMP1B_Kwon201107_XENLA_00008541	0.367635	3.53519	13.2105	0.000278385	0.0264382	NA_CHMP1B_Kwon201107_XENLA_00008541	PTHR10476	CHARGED MULTIVESICULAR BODY PROTEIN	GO SLIM	GO:0016192	vesicle-mediated transport
Slc38a8_SLC38A8_Taira201203_XENLA_stage_00079345	0.429009	2.42974	13.2019	0.000279663	0.0264382	NA	NA	NA	NA	NA	NA
Dusp1_NM_001088684.1	-0.344934	4.60038	13.1792	0.000283076	0.0266237	Dusp1_NM_001088684.1	PTHR10159	DUAL SPECIFICITY PROTEIN PHOSPHATASE	GO SLIM	GO:0016787	hydrolase activity
Rab40b_RAB40B_TC422091	0.337617	5.29793	13.0973	0.000295722	0.0275885	Rab40b_RAB40B_TC422091	PTHR24073	FAMILY NOT NAMED	GO SLIM	GO:0003924	GTPase activity
Rnf24_RNF24_Taira201203_XENLA_tissue_00178150	0.36215	4.20231	13.0872	0.000297323	0.0275885	NA	NA	NA	NA	NA	NA
Sdhd_SDHD_XeXenL6RMv10041922m	0.443339	1.98615	13.0839	0.000297848	0.0275885	Sdhd_SDHD_XeXenL6RMv10041922m	PTHR13337	SUCCINATE DEHYDROGENASE	GO SLIM	GO:0005975	carbohydrate metabolic process
NA_BC074217.1	0.342189	4.82322	13.0476	0.00030368	0.0279874	NA_BC074217.1	PTHR10030	ALPHA-L-FUCOSIDASE	GO SLIM	GO:0016787	hydrolase activity
NA_ACAP3_Kwon201107_XENLA_00059556	0.364099	3.83157	13.0281	0.000306848	0.028138	NA_ACAP3_Kwon201107_XENLA_00059556	PTHR23180	CENTAURIN/ARF	GO SLIM	GO:0005083	small GTPase regulator activity
NA_NM_001096883.1	0.349285	4.62629	12.9823	0.000314445	0.0285853	NA	NA	NA	NA	NA	NA
NA_CHRD_Horb201201_XENLA_00200238	0.35768	3.90605	12.98	0.000314844	0.0285853	NA	NA	NA	NA	NA	NA
Trib1_TRIB1_Park201106_XENLA_00159745	-0.457948	1.54866	12.9224	0.000324677	0.0293329	Trib1_TRIB1_Park201106_XENLA_00159745	PTHR22961	SER/THR PROTEIN KINASE-TRB	GO SLIM	GO:0016740	transferase activity
NA_HSPG2_Ismailoglu201203_XENLA_00073381	0.33074	5.55614	12.8555	0.00033648	0.0302502	NA_HSPG2_Ismailoglu201203_XENLA_00073381	PTHR10489	CELL ADHESION MOLECULE	GO SLIM	GO:0007154	cell communication
NA_LIN54_mgEST_Xl4jul2012_1013110819	-0.344668	3.99072	12.6976	0.000366129	0.0327551	NA	NA	NA	NA	NA	NA
NA_CCT4_Taira201203_XENLA_stage_00189248	0.3554	3.97274	12.6773	0.000370126	0.032952	NA_CCT4_Taira201203_XENLA_stage_00189248	PTHR11353	CHAPERONIN	GO SLIM	GO:0019538	protein metabolic process
NA_BC099044.1	0.339769	4.60033	12.6512	0.000375332	0.0332162	NA_BC099044.1	PTHR15953	FAMILY NOT NAMED	GO SLIM	GO:0005515	protein binding
NA_AY894836.1	-0.391729	2.57178	12.6443	0.000376716	0.0332162	NA_AY894836.1	PTHR23042	CIRCADIAN PROTEIN CLOCK/ARNT/BMAL/PAS	GO SLIM	GO:0003676	nucleic acid binding
Sesn1_SESN1_TC419834	0.355434	3.97094	12.6119	0.000383293	0.0336344	Sesn1_SESN1_TC419834	PTHR12474	P53 REGULATED PA26 NUCLEAR PROTEIN SESTRIN	GO SLIM	GO:0004601	peroxidase activity
Mn1_MN1_Taira201203_XENLA_stage_00064145	0.360911	3.65338	12.5976	0.000386235	0.0337312	NA	NA	NA	NA	NA	NA
NA_CRX_Ismailoglu201203_XENLA_00054319	0.318824	6.92319	12.5743	0.000391092	0.0338913	NA	NA	NA	NA	NA	NA
Upp2_UPP2_TeperekTkacz201202_XENLA_00104215	0.459732	1.83434	12.5711	0.000391764	0.0338913	Upp2_UPP2_TeperekTkacz201202_XENLA_00104215	PTHR21234:SF4	URIDINE PHOSPHORYLASE	GO SLIM	GO:0016740	transferase activity
NA_NA_TC462644	-0.47035	1.39347	12.553	0.000395575	0.0339875	NA_NA_TC462644	PTHR24103:SF74	SUBFAMILY NOT NAMED	GO SLIM	GO:0016874	ligase activity
NA_BX000999.6_Ismailoglu201203_XENLA_00002015	-0.321059	6.67622	12.5482	0.000396582	0.0339875	NA_BX000999.6_Ismailoglu201203_XENLA_00002015	PTHR23022	TRANSPOSABLE ELEMENT-RELATED	GO SLIM	GO:0016787	hydrolase activity
NA_KRT12_Taira201203_XENLA_stage_00145270	0.327058	6.22339	12.4926	0.000408561	0.0347182	NA_KRT12_Taira201203_XENLA_stage_00145270	PTHR23239	INTERMEDIATE FILAMENT	GO SLIM	GO:0005200	structural constituent of cytoskeleton
NA_NA_Quigley201112_XENLA_00059155	0.4566	1.7594	12.4858	0.000410059	0.0347182	NA	NA	NA	NA	NA	NA
NA_BSG_Taira201203_XENLA_stage_00157358	-0.348848	3.7955	12.4825	0.000410788	0.0347182	NA_BSG_Taira201203_XENLA_stage_00157358	PTHR10075:SF6	BASIGIN	GO SLIM	GO:0007166	cell surface receptor linked signal transduction
Txndc9_BC045061.1	0.3403	4.45001	12.4382	0.000420646	0.0353883	Txndc9_BC045061.1	PTHR21148:SF11	THIOREDOXIN DOMAIN CONTAINING PROTEIN 9-RELATED	GO SLIM	GO:0007067	mitosis
NA_NM_001112827.1	-0.360163	3.40697	12.413	0.000426348	0.0357042	NA	NA	NA	NA	NA	NA
Rasal1_RASAL1_Quigley201207_XENLA_00012499	-0.409738	2.21105	12.3813	0.000433655	0.0360861	Rasal1_RASAL1_Quigley201207_XENLA_00012499	PTHR10194	RAS GTPASE-ACTIVATING PROTEINS	GO SLIM	GO:0005083	small GTPase regulator activity
NA_BC157495.1	0.320829	7.00028	12.3762	0.000434843	0.0360861	NA	NA	NA	NA	NA	NA
Hs3st3b1_HS3ST3A1_TC420639	0.405935	2.58556	12.3633	0.000437866	0.0361288	Hs3st3b1_HS3ST3A1_TC420639	PTHR10605	HEPARAN SULFATE 3-O SULFOTRANSFERASE	GO SLIM	GO:0016740	transferase activity
NA_PCDH19_Taira201203_XENLA_tissue_00230375	0.341436	4.14193	12.3404	0.000443262	0.0361288	NA_PCDH19_Taira201203_XENLA_tissue_00230375	PTHR24028	FAMILY NOT NAMED	GO SLIM	GO:0005509	calcium ion binding
NA_BX000999.6_Ismailoglu201203_XENLA_00000418	-0.317653	6.86803	12.3356	0.000444402	0.0361288	NA_BX000999.6_Ismailoglu201203_XENLA_00000418	PTHR23022	TRANSPOSABLE ELEMENT-RELATED	GO SLIM	GO:0016787	hydrolase activity
NA_TANC1_Taira201203_XENLA_stage_00177563	0.356695	3.54984	12.3331	0.000444996	0.0361288	NA	NA	NA	NA	NA	NA
Plk2_BC045272.1	0.338001	5.50637	12.3312	0.000445441	0.0361288	Plk2_BC045272.1	PTHR24345	SERINE/THREONINE-PROTEIN KINASE PLK	GO SLIM	GO:0016740	transferase activity
NA_CTPS_Ismailoglu201203_XENLA_00039586	0.320788	6.48429	12.324	0.000447178	0.0361288	NA_CTPS_Ismailoglu201203_XENLA_00039586	PTHR11550	CTP SYNTHASE	GO SLIM	GO:0016874	ligase activity
Ralgds_RALGDS_Taira201203_XENLA_tissue_00008966	0.356657	3.53918	12.2674	0.000460935	0.037077	Ralgds_RALGDS_Taira201203_XENLA_tissue_00008966	PTHR23113:SF35	RAL GUANINE NUCLEOTIDE DISSOCIATION STIMULATOR, RALGDS	GO SLIM	GO:0005083	small GTPase regulator activity
Zbtb24_ZBTB24_TeperekTkacz201202_XENLA_00074894	-0.368873	2.9785	12.2406	0.000467595	0.0374485	Zbtb24_ZBTB24_TeperekTkacz201202_XENLA_00074894	PTHR24375	FAMILY NOT NAMED	GO SLIM	GO:0003676	nucleic acid binding
Cdc6_CDC6_TC417298	-0.319024	6.0427	12.2043	0.000476782	0.0380182	Cdc6_CDC6_TC417298	PTHR10763:SF18	CELL DIVISION CONTROL PROTEIN 6-RELATED	GO SLIM	GO:0003688	DNA replication origin binding
NA_MTSS1.1_Taira201203_XENLA_stage_00104985	-0.379687	2.70169	12.1549	0.0004896	0.0386636	NA_MTSS1.1_Taira201203_XENLA_stage_00104985	PTHR15708	ACTIN BUNDLING/MISSING IN METASTASIS-RELATED	GO SLIM	GO:0005198	structural molecule activity
NA_NA_Taira201203_XENLA_tissue_00257476	0.403509	2.16621	12.1547	0.000489652	0.0386636	NA_NA_Taira201203_XENLA_tissue_00257476	PTHR15073	MICROTUBULE-ASSOCIATED PROTEIN	GO SLIM	GO:0008092	cytoskeletal protein binding
NA_RBM20_XeXenL6RMv10032301m	0.328688	4.73519	12.1488	0.0004912	0.0386636	NA_RBM20_XeXenL6RMv10032301m	PTHR11546	HETEROGENEOUS NUCLEAR RIBONUCLEOPROTEIN	GO SLIM	GO:0003676	nucleic acid binding
Lsp1_NM_001127789.1	0.445915	1.58645	12.1306	0.000496006	0.038875	Lsp1_NM_001127789.1	PTHR18949	CALDESMON	GO SLIM	GO:0008092	cytoskeletal protein binding
Bmp2_BMP2_Taira201203_XENLA_tissue_00185370	0.384963	2.93401	12.1142	0.000500387	0.0390515	Bmp2_BMP2_Taira201203_XENLA_tissue_00185370	PTHR11848	TGF-BETA FAMILY	GO SLIM	GO:0005515	protein binding
NA_TFAP2C_Taira201203_XENLA_stage_00204194	0.317359	6.61965	12.1021	0.000503663	0.0391406	NA_TFAP2C_Taira201203_XENLA_stage_00204194	PTHR10812	TRANSCRIPTION FACTOR AP-2	GO SLIM	GO:0003676	nucleic acid binding
NA_FZD8_mgEST_Xl4jul2012_1013156664	0.327461	4.8661	12.0886	0.000507306	0.0392574	NA	NA	NA	NA	NA	NA
Aldh18a1_ALDH18A1_Kwon201107_XENLA_00030010	0.3543	3.63327	12.055	0.000516539	0.0398039	Aldh18a1_ALDH18A1_Kwon201107_XENLA_00030010	PTHR11063	GLUTAMATE SEMIALDEHYDE DEHYDROGENASE	GO SLIM	GO:0016491	oxidoreductase activity
NA_NA_XeXenL6RMv10008403m	0.329331	4.70873	12.0041	0.000530823	0.0407335	NA_NA_XeXenL6RMv10008403m	PTHR10579	CALCIUM-ACTIVATED CHLORIDE CHANNEL REGULATOR	GO SLIM	GO:0005216	ion channel activity
NA_ARNTL_TC416134	-0.339805	3.84063	11.9931	0.000533965	0.0408038	NA_ARNTL_TC416134	PTHR23042	CIRCADIAN PROTEIN CLOCK/ARNT/BMAL/PAS	GO SLIM	GO:0003676	nucleic acid binding
NA_MARCH8_TeperekTkacz201206_XENLA_00094067	0.31817	6.62402	11.9768	0.000538659	0.0409917	NA_MARCH8_TeperekTkacz201206_XENLA_00094067	PTHR23012:SF7	MEMBRANE ASSOCIATED RING FINGER 1,8	GO SLIM	GO:0016874	ligase activity
NA_NA_TeperekTkacz201206_XENLA_00061459	-0.333417	4.55403	11.9321	0.000551757	0.041815	NA_NA_TeperekTkacz201206_XENLA_00061459	PTHR10985	BASIC HELIX-LOOP-HELIX TRANSCRIPTION FACTOR, HES-RELATED	GO SLIM	GO:0003676	nucleic acid binding
NA_NP_001015860.1_XeXenL6RMv10032645m	0.343908	3.86607	11.914	0.000557144	0.0420495	NA_NP_001015860.1_XeXenL6RMv10032645m	PTHR10030	ALPHA-L-FUCOSIDASE	GO SLIM	GO:0016787	hydrolase activity
Mxi1_MXI1_Taira201203_XENLA_stage_00119850	-0.370238	2.8435	11.8922	0.000563706	0.0423704	Mxi1_MXI1_Taira201203_XENLA_stage_00119850	PTHR11969:SF5	MAX DIMERIZATION PROTEIN 1, MAD1	GO SLIM	GO:0003676	nucleic acid binding
NA_APLN_TeperekTkacz201206_XENLA_00013087	0.325193	4.88745	11.8455	0.000578007	0.043268	NA_APLN_TeperekTkacz201206_XENLA_00013087	PTHR15953	FAMILY NOT NAMED	GO SLIM	GO:0005515	protein binding
NA_ZC3H3_Taira201203_XENLA_tissue_00257566	-0.372991	2.62969	11.8349	0.000581316	0.0433388	NA_ZC3H3_Taira201203_XENLA_tissue_00257566	PTHR23102	ZINC FINGER (CLIPPER)-RELATED	GO SLIM	GO:0016787	hydrolase activity
NA_HNF1B_TC445330	0.368368	2.89137	11.7453	0.000609986	0.0452921	NA_HNF1B_TC445330	PTHR11568	HEPATOCYTE NUCLEAR FACTOR 1	GO SLIM	GO:0003676	nucleic acid binding
NA_FGFR2_TeperekTkacz201206_XENLA_00119229	0.323325	5.12417	11.6461	0.000643387	0.0475795	NA_FGFR2_TeperekTkacz201206_XENLA_00119229	PTHR24416	TYROSINE-PROTEIN KINASE RECEPTOR	GO SLIM	GO:0016740	transferase activity
NA_MMEL1_Ismailoglu201203_XENLA_00069637	0.365309	2.9152	11.6353	0.000647124	0.0476637	NA_MMEL1_Ismailoglu201203_XENLA_00069637	PTHR11733	ZINC METALLOPROTEASE FAMILY M13 NEPRILYSIN-RELATED	GO SLIM	GO:0016787	hydrolase activity
NA_NA_Horb201201_XENLA_00010666	0.435765	1.69015	11.6081	0.000656648	0.0481717	NA_NA_Horb201201_XENLA_00010666	PTHR11905	ADAM (A DISINTEGRIN AND METALLOPROTEASE DOMAIN)	GO SLIM	GO:0016787	hydrolase activity
NA_BC129634.1	0.34332	3.47856	11.5563	0.000675217	0.0490136	NA_BC129634.1	PTHR10811	FRINGE-RELATED	GO SLIM	GO:0016740	transferase activity
NA_RNASEK_TC432768	-0.323486	4.90303	11.5563	0.000675217	0.0490136	NA	NA	NA	NA	NA	NA
NA_NRM_Ismailoglu201203_XENLA_00067056	0.316207	5.15734	11.5537	0.000676141	0.0490136	NA	NA	NA	NA	NA	NA
NA_NM_001090633.1	0.355447	2.95414	11.5085	0.000692781	0.0498888	NA_NM_001090633.1	PTHR24080	FAMILY NOT NAMED	GO SLIM	GO:0003676	nucleic acid binding
NA_RALGDS_Taira201203_XENLA_stage_00035335	0.331735	4.11955	11.5062	0.000693656	0.0498888	NA_RALGDS_Taira201203_XENLA_stage_00035335	PTHR23113:SF35	RAL GUANINE NUCLEOTIDE DISSOCIATION STIMULATOR, RALGDS	GO SLIM	GO:0005083	small GTPase regulator activity

## Sheet: Misregulated transcripts
Misregulated transcripts (consistently up- or downregulated in at least 6/7 experiments)	logFC_Spermatid_Divided_By_Sperm	logCPM	LR	PValue	FDR	ID	FamID	PanFamily	GO	GOID	GODesc
NA_C19ORF26_TeperekTkacz201202_XENLA_00119152	-0.652593	2.79179	35.5745	2.45483e-09	3.21582e-06	NA	NA	NA	NA	NA	NA
NA_SOX21_Taira201203_XENLA_tissue_00192034	-0.493086	2.61356	19.183	1.18769e-05	0.0027926	NA_SOX21_Taira201203_XENLA_tissue_00192034	PTHR10270	SOX TRANSCRIPTION FACTOR	GO SLIM	GO:0003676	nucleic acid binding
NA_NM_001087625.1	-0.490418	5.27495	27.557	1.5253e-07	9.32467e-05	NA	NA	NA	NA	NA	NA
NA_NM_001096070.1	-0.487466	3.71746	23.9778	9.74519e-07	0.00042554	NA_NM_001096070.1	PTHR24377	FAMILY NOT NAMED	GO SLIM	GO:0003676	nucleic acid binding
NA_BC099357.1	-0.453912	3.02845	18.8843	1.38892e-05	0.00314479	NA	NA	NA	NA	NA	NA
NA_NIF_Taira201203_XENLA_stage_00073688	-0.452651	3.23561	18.5557	1.65009e-05	0.00343894	NA_NIF_Taira201203_XENLA_stage_00073688	PTHR23239	INTERMEDIATE FILAMENT	GO SLIM	GO:0005200	structural constituent of cytoskeleton
Klhl24_KLHL24_Kwon201107_XENLA_00111234	-0.439759	2.66301	16.2546	5.53745e-05	0.00860651	NA	NA	NA	NA	NA	NA
NA_AY112700.1	-0.4263	3.78004	18.5831	1.62654e-05	0.00342883	NA_AY112700.1	PTHR10605	HEPARAN SULFATE 3-O SULFOTRANSFERASE	GO SLIM	GO:0016740	transferase activity
NA_STX19_Taira201203_XENLA_tissue_00235164	-0.424444	4.48651	19.981	7.82163e-06	0.00214103	NA_STX19_Taira201203_XENLA_tissue_00235164	PTHR19957:SF29	SYNTAXIN-RELATED	GO SLIM	GO:0005515	protein binding
NA_XB-GENE-5895314_Taira201203_XENLA_stage_00007898	-0.423342	4.18625	18.6354	1.58251e-05	0.0033748	NA_XB-GENE-5895314_Taira201203_XENLA_stage_00007898	PTHR24103:SF74	SUBFAMILY NOT NAMED	GO SLIM	GO:0016874	ligase activity
Hs3st1_HS3ST1_Taira201203_XENLA_stage_00203768	-0.418801	3.63862	17.6622	2.63815e-05	0.0049371	Hs3st1_HS3ST1_Taira201203_XENLA_stage_00203768	PTHR10605	HEPARAN SULFATE 3-O SULFOTRANSFERASE	GO SLIM	GO:0016740	transferase activity
NA_NM_001091189.1	-0.408858	5.10873	19.4319	1.04252e-05	0.00252762	NA_NM_001091189.1	PTHR19957:SF29	SYNTAXIN-RELATED	GO SLIM	GO:0005515	protein binding
NA_BIX1.2_TC420565	-0.405383	3.46844	15.252	9.40793e-05	0.0123051	NA_BIX1.2_TC420565	PTHR24326:SF76	SUBFAMILY NOT NAMED	GO SLIM	GO:0003676	nucleic acid binding
Fam83b_FAM83B_Taira201203_XENLA_tissue_00190021	-0.401331	4.2896	17.5007	2.87196e-05	0.00511376	NA	NA	NA	NA	NA	NA
Sh2d3c_NM_001086827.1	-0.385953	3.8145	15.3635	8.8683e-05	0.0121184	Sh2d3c_NM_001086827.1	PTHR14247:SF6	SUBFAMILY NOT NAMED	GO SLIM	GO:0007154	cell communication
Ccdc158_CCDC158_Kwon201107_XENLA_00069282	-0.367643	4.30019	14.8111	0.000118832	0.0136211	NA	NA	NA	NA	NA	NA
NA_CHD3_Ismailoglu201203_XENLA_00000455	-0.362271	7.04867	16.2161	5.65119e-05	0.00870948	NA_CHD3_Ismailoglu201203_XENLA_00000455	PTHR10799	SWI/SNF-RELATED MATRIX-ASSOCIATED ACTIN-DEPENDENT REGULATOR OF CHROMATIN SUBFAMILY-RELATED	GO SLIM	GO:0003678	DNA helicase activity
NA_FAM46C_XeXenL6RMv10040501m	-0.351525	7.03329	15.3214	9.06821e-05	0.0121184	NA	NA	NA	NA	NA	NA
Gata2_NM_001090574.1	0.352323	7.03556	15.1046	0.000101715	0.0129069	Gata2_NM_001090574.1	PTHR10071	TRANSCRIPTION FACTOR GATA (GATA BINDING FACTOR)	GO SLIM	GO:0003676	nucleic acid binding
Fat1_FAT1_Taira201203_XENLA_tissue_00017935	0.364714	5.05696	15.2106	9.61619e-05	0.0124198	Fat1_FAT1_Taira201203_XENLA_tissue_00017935	PTHR24027:SF76	SUBFAMILY NOT NAMED	GO SLIM	GO:0005509	calcium ion binding
NA_PKDCC.2_Ismailoglu201203_XENLA_00003533	0.368771	4.74234	14.9075	0.000112915	0.0133604	NA	NA	NA	NA	NA	NA
Foxa2_FOXA2_Quigley201112_XENLA_00082222	0.376768	4.739	15.4146	8.63201e-05	0.0119031	Foxa2_FOXA2_Quigley201112_XENLA_00082222	PTHR11829	FAMILY NOT NAMED	GO SLIM	GO:0003676	nucleic acid binding
NA_LFNG_Audic201207_XENLA_00002214	0.377136	4.75654	15.9987	6.33858e-05	0.00945118	NA_LFNG_Audic201207_XENLA_00002214	PTHR10811	FRINGE-RELATED	GO SLIM	GO:0016740	transferase activity
Alg2_ALG2_Audic201207_XENLA_00001739	0.378361	4.07301	15.2415	9.46031e-05	0.0123051	Alg2_ALG2_Audic201207_XENLA_00001739	PTHR12526:SF22	ALPHA-1,3-MANNOSYLTRANSFERASE	GO SLIM	GO:0016740	transferase activity
NA_C6ORF47_Kwon201107_XENLA_00076346	0.383642	3.77244	14.8236	0.000118051	0.0136211	NA	NA	NA	NA	NA	NA
NA_C11ORF2_TC415679	0.385258	3.79229	14.9118	0.000112654	0.0133604	NA	NA	NA	NA	NA	NA
NA_OTX2_XeXenL6RMv10009265m	0.387252	5.50605	17.5472	2.8027e-05	0.00508925	NA	NA	NA	NA	NA	NA
Olfm4_OLFM4_Quigley201112_XENLA_00066091	0.389248	4.09799	15.836	6.90769e-05	0.0100545	Olfm4_OLFM4_Quigley201112_XENLA_00066091	PTHR23192:SF7	TIARIN	GO SLIM	GO:0004872	receptor activity
NA_AJ009291.1	0.390204	4.53086	15.3364	8.99645e-05	0.0121184	NA	NA	NA	NA	NA	NA
NA_HAO1_Ismailoglu201203_XENLA_00048104	0.390785	5.24597	17.318	3.16183e-05	0.00541943	NA_HAO1_Ismailoglu201203_XENLA_00048104	PTHR10578	(S)-2-HYDROXY-ACID OXIDASE-RELATED	GO SLIM	GO:0016874	ligase activity
NA_NA_Taira201203_XENLA_stage_00034511	0.391984	3.54813	15.1844	9.75062e-05	0.0125053	NA_NA_Taira201203_XENLA_stage_00034511	PTHR12635	RHO-GTPASE-ACTIVATING PROTEIN 6	GO SLIM	GO:0005198	structural molecule activity
NA_AF549892.1	0.39497	4.06585	16.0711	6.1009e-05	0.00917136	NA	NA	NA	NA	NA	NA
NA_NM_001086215.1	0.398711	3.26902	14.9357	0.000111236	0.0133338	NA_NM_001086215.1	PTHR19325:SF165	SUBFAMILY NOT NAMED	GO SLIM	GO:0050896	response to stimulus
NA_NM_001088556.1	0.401171	5.78407	18.9653	1.33118e-05	0.00305173	NA_NM_001088556.1	PTHR11309:SF12	WNT INHIBITOR FRZB2	GO SLIM	GO:0005515	protein binding
NA_RHOG.2_Ismailoglu201203_XENLA_00028496	0.403075	3.35181	15.7031	7.41038e-05	0.0105533	NA	NA	NA	NA	NA	NA
Pkdcc_PKDCC.2_Quigley201112_XENLA_00017357	0.404944	3.68527	15.6874	7.4719e-05	0.0105533	NA	NA	NA	NA	NA	NA
NA_NM_001130950.1	0.406315	5.8041	19.6171	9.46174e-06	0.00244406	NA_NM_001130950.1	PTHR19143:SF51	SUBFAMILY NOT NAMED	GO SLIM	GO:0005515	protein binding
NA_NM_001090691.1	0.40934	5.31657	19.4691	1.02242e-05	0.00252762	NA	NA	NA	NA	NA	NA
NA_BC041714.1	0.413249	4.12429	17.7534	2.51471e-05	0.00480414	NA_BC041714.1	PTHR23334	CCAAT/ENHANCER BINDING PROTEIN	GO SLIM	GO:0003676	nucleic acid binding
NA_MN1_XeXenL6RMv10006960m	0.414262	3.38927	15.6646	7.56281e-05	0.0105879	NA	NA	NA	NA	NA	NA
NA_NDUFA8_Ismailoglu201203_XENLA_00021702	0.41635	4.29691	17.9148	2.31022e-05	0.00455585	NA_NDUFA8_Ismailoglu201203_XENLA_00021702	PTHR13344	NADH-UBIQUINONE OXIDOREDUCTASE	GO SLIM	GO:0016491	oxidoreductase activity
Sema6a_SEMA6A_Audic201207_XENLA_00002860	0.42106	4.69782	19.7807	8.68556e-06	0.0023086	Sema6a_SEMA6A_Audic201207_XENLA_00002860	PTHR11036	SEMAPHORIN	GO SLIM	GO:0005515	protein binding
Dhh_DHH_Taira201203_XENLA_tissue_00262576	0.42214	2.79709	14.9431	0.000110805	0.0133338	Dhh_DHH_Taira201203_XENLA_tissue_00262576	PTHR11889	HEDGEHOG	GO SLIM	GO:0016787	hydrolase activity
NA_NM_001086806.1	0.423195	4.1625	18.696	1.53305e-05	0.00330779	NA_NM_001086806.1	PTHR23334	CCAAT/ENHANCER BINDING PROTEIN	GO SLIM	GO:0003676	nucleic acid binding
NA_AJ009290.1	0.425412	5.50489	20.0163	7.67834e-06	0.00213365	NA	NA	NA	NA	NA	NA
BC034090_KIAA1614_Taira201203_XENLA_tissue_00286533	0.433814	2.8721	15.045	0.000104978	0.013088	BC034090_KIAA1614_Taira201203_XENLA_tissue_00286533	PTHR17130:SF7	SYNAPTOJANIN 2 BINDING PROTEIN	GO SLIM	GO:0007165	signal transduction
Slc7a5_NM_001090065.1	0.441034	3.60731	17.0858	3.57293e-05	0.00601169	Slc7a5_NM_001090065.1	PTHR11785:SF74	CATIONIC AMINO ACID TRANSPORTER SLC7A11	GO SLIM	GO:0022857	transmembrane transporter activity
Plbd2_PLBD2_Taira201203_XENLA_tissue_00238408	0.442054	2.99987	17.4039	3.02203e-05	0.00527847	NA	NA	NA	NA	NA	NA
NA_DARMIN_TeperekTkacz201206_XENLA_00081109	0.444344	5.12447	22.1564	2.51315e-06	0.000885309	NA_DARMIN_TeperekTkacz201206_XENLA_00081109	PTHR11014	PEPTIDASE M20 FAMILY MEMBER	GO SLIM	GO:0016787	hydrolase activity
NA_NM_001089073.1	0.444486	6.01941	23.3364	1.36004e-06	0.000554292	NA_NM_001089073.1	PTHR22972	SERINE/THREONINE PROTEIN KINASE	GO SLIM	GO:0004675	transmembrane receptor protein serine/threonine kinase activity
NA_BC092021.1	0.445052	2.62326	15.323	9.06078e-05	0.0121184	NA_BC092021.1	PTHR11848	TGF-BETA FAMILY	GO SLIM	GO:0005515	protein binding
NA_DHH_Ismailoglu201203_XENLA_00066372	0.452883	3.02472	18.0688	2.13069e-05	0.00424749	NA_DHH_Ismailoglu201203_XENLA_00066372	PTHR11889	HEDGEHOG	GO SLIM	GO:0016787	hydrolase activity
NA_ROBO3_Taira201203_XENLA_tissue_00093443	0.456192	2.30369	15.7126	7.37304e-05	0.0105533	NA_ROBO3_Taira201203_XENLA_tissue_00093443	PTHR10489	CELL ADHESION MOLECULE	GO SLIM	GO:0007154	cell communication
NA_BTG2_Taira201203_XENLA_stage_00047238	0.46096	3.89057	20.3309	6.51391e-06	0.00192686	NA_BTG2_Taira201203_XENLA_stage_00047238	PTHR22978:SF14	BTG FAMILY, MEMBER 2	GO SLIM	GO:0007242	intracellular signaling cascade
NA_NR1H2_Amin201106_XENLA_00091994	0.462989	1.88968	14.8172	0.000118449	0.0136211	NA	NA	NA	NA	NA	NA
NA_NA_TeperekTkacz201206_XENLA_00127873	0.468281	4.23495	22.8943	1.71162e-06	0.000667898	NA	NA	NA	NA	NA	NA
Gata3_NM_001090866.1	0.470794	3.355	20.2086	6.94408e-06	0.00198991	Gata3_NM_001090866.1	PTHR10071	TRANSCRIPTION FACTOR GATA (GATA BINDING FACTOR)	GO SLIM	GO:0003676	nucleic acid binding
NA_D31760.1	0.483384	2.06946	16.5418	4.75896e-05	0.00772384	NA_D31760.1	PTHR26391	FAMILY NOT NAMED	GO SLIM	GO:0016740	transferase activity
NA_NM_001095695.1	0.484633	2.12584	15.0335	0.000105617	0.013088	NA	NA	NA	NA	NA	NA
NA_MN1_Park201106_XENLA_00072263	0.488424	3.14692	20.4436	6.14157e-06	0.0018465	NA	NA	NA	NA	NA	NA
NA_HES1_Quigley201207_XENLA_00083872	0.489541	2.86883	20.0289	7.62816e-06	0.00213365	NA_HES1_Quigley201207_XENLA_00083872	PTHR10985	BASIC HELIX-LOOP-HELIX TRANSCRIPTION FACTOR, HES-RELATED	GO SLIM	GO:0003676	nucleic acid binding
NA_BMP7.1_XeXenL6RMv10005646m	0.490563	2.09312	15.0392	0.0001053	0.013088	NA_BMP7.1_XeXenL6RMv10005646m	PTHR11848	TGF-BETA FAMILY	GO SLIM	GO:0005515	protein binding
Lama1_LAMA1_Amin201106_XENLA_00003444	0.49158	2.89299	18.7465	1.49294e-05	0.00325958	NA	NA	NA	NA	NA	NA
Hes1_BC054333.1	0.494923	4.65787	26.7785	2.28157e-07	0.0001268	NA	NA	NA	NA	NA	NA
NA_HES7.1_Taira201203_XENLA_stage_00017246	0.497093	3.35865	22.9084	1.69905e-06	0.000667898	NA_HES7.1_Taira201203_XENLA_stage_00017246	PTHR10985	BASIC HELIX-LOOP-HELIX TRANSCRIPTION FACTOR, HES-RELATED	GO SLIM	GO:0003676	nucleic acid binding
Cebpa_NM_001091687.1	0.497394	3.6833	22.6049	1.98974e-06	0.000738729	Cebpa_NM_001091687.1	PTHR23334	CCAAT/ENHANCER BINDING PROTEIN	GO SLIM	GO:0003676	nucleic acid binding
Tbx3_NM_001087933.1	0.501057	2.6305	18.8013	1.45069e-05	0.00320551	Tbx3_NM_001087933.1	PTHR11267	T-BOX PROTEIN-RELATED	GO SLIM	GO:0003676	nucleic acid binding
NA_NF1_XeXenL6RMv10010215m	0.503264	1.60908	16.6967	4.38564e-05	0.00718149	NA_NF1_XeXenL6RMv10010215m	PTHR10194	RAS GTPASE-ACTIVATING PROTEINS	GO SLIM	GO:0005083	small GTPase regulator activity
NA_FOSL2_Quigley201112_XENLA_00079851	0.518429	2.42465	20.6141	5.61811e-06	0.00171727	NA_FOSL2_Quigley201112_XENLA_00079851	PTHR23351	FOS TRANSCRIPTION FACTOR-RELATED	GO SLIM	GO:0003676	nucleic acid binding
NA_HES1_Park201106_XENLA_00070357	0.519021	4.44585	28.5072	9.33491e-08	6.34082e-05	NA_HES1_Park201106_XENLA_00070357	PTHR10985	BASIC HELIX-LOOP-HELIX TRANSCRIPTION FACTOR, HES-RELATED	GO SLIM	GO:0003676	nucleic acid binding
NA_GATA3_Taira201203_XENLA_tissue_00212153	0.525062	3.41565	25.4527	4.53359e-07	0.000232585	NA_GATA3_Taira201203_XENLA_tissue_00212153	PTHR10071	TRANSCRIPTION FACTOR GATA (GATA BINDING FACTOR)	GO SLIM	GO:0003676	nucleic acid binding
Lamb1_LAMB1_Taira201203_XENLA_stage_00035701	0.525983	5.29125	31.0966	2.45497e-08	2.14401e-05	Lamb1_LAMB1_Taira201203_XENLA_stage_00035701	PTHR24661:SF37	SUBFAMILY NOT NAMED	GO SLIM	GO:0004872	receptor activity
NA_NM_001088706.1	0.534561	3.48901	26.9176	2.12317e-07	0.000121684	NA_NM_001088706.1	PTHR10985	BASIC HELIX-LOOP-HELIX TRANSCRIPTION FACTOR, HES-RELATED	GO SLIM	GO:0003676	nucleic acid binding
NA_NA_Taira201203_XENLA_stage_00000768	0.542173	2.92813	25.4392	4.56547e-07	0.000232585	NA	NA	NA	NA	NA	NA
Agrn_AGRN_Taira201203_XENLA_tissue_00124619	0.543744	2.529	22.7322	1.8622e-06	0.000711514	NA	NA	NA	NA	NA	NA
NA_KRT_XeXenL6RMv10001064m	0.544712	4.64586	29.599	5.3131e-08	3.89769e-05	NA_KRT_XeXenL6RMv10001064m	PTHR23239	INTERMEDIATE FILAMENT	GO SLIM	GO:0005200	structural constituent of cytoskeleton
NA_DEDD2_Quigley201112_XENLA_00039209	0.545874	1.47891	18.4299	1.76269e-05	0.00359198	NA	NA	NA	NA	NA	NA
NA_NA_TC446730	0.553644	2.59875	24.9027	6.02966e-07	0.00029101	NA_NA_TC446730	PTHR12635	RHO-GTPASE-ACTIVATING PROTEIN 6	GO SLIM	GO:0005198	structural molecule activity
NA_GJB2_Taira201203_XENLA_stage_00124664	0.553681	6.62328	36.8712	1.26199e-09	1.92874e-06	NA_GJB2_Taira201203_XENLA_stage_00124664	PTHR11984:SF25	GB DEF: GAP JUNCTION BETA-6 PROTEIN (CONNEXIN 31) (CX31)	GO SLIM	GO:0005243	gap junction channel activity
NA_SFRP2_Ismailoglu201203_XENLA_00017150	0.560283	5.47949	36.3948	1.61135e-09	2.27325e-06	NA	NA	NA	NA	NA	NA
NA_SLC23A2_TeperekTkacz201202_XENLA_00117834	0.561869	2.41428	24.171	8.81482e-07	0.00040416	NA_SLC23A2_TeperekTkacz201202_XENLA_00117834	PTHR11119	XANTHINE-URACIL / VITAMIN C PERMEASE FAMILY MEMBER	GO SLIM	GO:0022857	transmembrane transporter activity
NA_KRT_TeperekTkacz201206_XENLA_00049303	0.56893	5.99006	33.958	5.6315e-09	6.07539e-06	NA_KRT_TeperekTkacz201206_XENLA_00049303	PTHR23239	INTERMEDIATE FILAMENT	GO SLIM	GO:0005200	structural constituent of cytoskeleton
Fos_FOS_XeXenL6RMv10027632m	0.594285	3.51266	33.2581	8.07014e-09	7.78981e-06	Fos_FOS_XeXenL6RMv10027632m	PTHR23351	FOS TRANSCRIPTION FACTOR-RELATED	GO SLIM	GO:0003676	nucleic acid binding
Mmrn2_MMRN2_Taira201203_XENLA_tissue_00243195	0.607017	2.25081	26.2932	2.93321e-07	0.000158221	Mmrn2_MMRN2_Taira201203_XENLA_tissue_00243195	PTHR15427	EMILIN (ELASTIN MICROFIBRIL INTERFACE-LOCATED PROTEIN) (ELASTIN MICROFIBRIL INTERFACER)	GO SLIM	GO:0007155	cell adhesion
Clcn2_CLCN2_Taira201203_XENLA_tissue_00146000	0.609314	1.6233	21.0025	4.58685e-06	0.00147584	Clcn2_CLCN2_Taira201203_XENLA_tissue_00146000	PTHR11689	CHLORIDE CHANNEL	GO SLIM	GO:0005216	ion channel activity
NA_SFRP2_Ismailoglu201203_XENLA_00042592	0.627171	4.99587	43.9658	3.34172e-11	1.02145e-07	NA	NA	NA	NA	NA	NA
Mtap_MTAP_XeXenL6RMv10027314m	0.630379	2.38768	30.1786	3.94036e-08	3.14201e-05	Mtap_MTAP_XeXenL6RMv10027314m	PTHR11904	METHYLTHIOADENOSINE/PURINE NUCLEOSIDE PHOSPHORYLASE	GO SLIM	GO:0016740	transferase activity
NA_FOS_Taira201203_XENLA_tissue_00143512	0.636534	3.53042	38.0677	6.83334e-10	1.1393e-06	NA_FOS_Taira201203_XENLA_tissue_00143512	PTHR23351	FOS TRANSCRIPTION FACTOR-RELATED	GO SLIM	GO:0003676	nucleic acid binding
NA_B0BMG0_XENTR_Taira201203_XENLA_tissue_00042092	0.636958	2.39941	30.0899	4.12483e-08	3.15206e-05	NA_B0BMG0_XENTR_Taira201203_XENLA_tissue_00042092	PTHR10194	RAS GTPASE-ACTIVATING PROTEINS	GO SLIM	GO:0005083	small GTPase regulator activity
NA_NDUFA8_Quigley201207_XENLA_00017558	0.638625	2.87207	33.2679	8.0299e-09	7.78981e-06	NA_NDUFA8_Quigley201207_XENLA_00017558	PTHR13344	NADH-UBIQUINONE OXIDOREDUCTASE	GO SLIM	GO:0016491	oxidoreductase activity
NA_HES1_TC421852	0.653084	2.266	30.638	3.10951e-08	2.5922e-05	NA_HES1_TC421852	PTHR10985	BASIC HELIX-LOOP-HELIX TRANSCRIPTION FACTOR, HES-RELATED	GO SLIM	GO:0003676	nucleic acid binding
Socs3_SOCS3_Taira201203_XENLA_tissue_00286385	0.656792	3.77054	38.8408	4.5982e-10	8.4331e-07	Socs3_SOCS3_Taira201203_XENLA_tissue_00286385	PTHR10385	SUPPRESSOR OF CYTOKINE SIGNALING	GO SLIM	GO:0005125	cytokine activity
Fosl2_FOSL2_Taira201203_XENLA_tissue_00235780	0.663919	3.33399	38.8446	4.58915e-10	8.4331e-07	Fosl2_FOSL2_Taira201203_XENLA_tissue_00235780	PTHR23351	FOS TRANSCRIPTION FACTOR-RELATED	GO SLIM	GO:0003676	nucleic acid binding
NA_NT5M_Quigley201207_XENLA_00091072	0.680336	2.51541	35.2719	2.86735e-09	3.50581e-06	NA	NA	NA	NA	NA	NA
Car7_CA7_TeperekTkacz201202_XENLA_00075957	0.715593	3.26296	43.5793	4.07123e-11	1.06666e-07	Car7_CA7_TeperekTkacz201202_XENLA_00075957	PTHR18952:SF26	CARBONIC ANHYDRASE VII (CARBONATE DEHYDRATASE VII)	GO SLIM	GO:0016829	lyase activity
Abcc5_NM_001096615.1	0.727449	1.61641	28.0279	1.19578e-07	7.56228e-05	Abcc5_NM_001096615.1	PTHR25912	FAMILY NOT NAMED	GO SLIM	GO:0006810	transport
NA_BC044072.1	0.730192	3.77243	39.6947	2.9693e-10	6.80712e-07	NA_BC044072.1	PTHR11412:SF36	ALPHA-MACROGLOBULIN	GO SLIM	GO:0004867	serine-type endopeptidase inhibitor activity
NA_PLOD2_Taira201203_XENLA_tissue_00074828	0.875324	4.31994	68.707	1.14233e-16	6.98344e-13	NA_PLOD2_Taira201203_XENLA_tissue_00074828	PTHR10730	PROCOLLAGEN-LYSINE,2-OXOGLUTARATE 5-DIOXYGENASE/GLYCOSYLTRANSFERASE 25 FAMILY MEMBER	GO SLIM	GO:0007155	cell adhesion
NA_AH010077.2	0.965002	4.39702	79.0175	6.15636e-19	5.64538e-15	NA	NA	NA	NA	NA	NA
Gjb1_GJB1_TC442449	1.04104	5.56416	108.661	1.92603e-25	3.53234e-21	Gjb1_GJB1_TC442449	PTHR11984:SF20	GAP JUNCTION BETA-1 PROTEIN (CONNEXIN 32)	GO SLIM	GO:0005243	gap junction channel activity
