# Supplementary material for: Sperm is epigenetically programmed to regulate gene transcription in embryos
Source: HighWire-hosted journal article supplement (doi:10.1101/gr.201541.115), 2016-03-31
Supplement: Supplemental_Table_S2.xlsx [file Supplemental_Table_S2.xlsx]

## Sheet: Sperm ChIP-seq experiments
	Controls – input fraction	Input - # total reads	Bound fraction	Bound - # total reads
H3K4me2
H3K4me2 ChIP 1	SLX-6643; index 10: input 150bp	23751875	SLX-6515, index 8: bound 150bp	28804095	# total reads
Ab 07-030, lot2089140		0.8914		0.8775	% mapping
		21171240		25275226	# mapped reads
H3K4me2 ChIP 2	SLX-6659, ind8, input 150bp	23659478	SLX-6661, ind9: bound 150bp	24059469	# total reads
Ab 07-030, lot2089140		-0.8968		0.8561	% mapping
		21218507		20596574	# mapped reads
H3K4me2 ChIP 3	SLX-6662, ind27, input 150bp	32257267	SLX-6662, ind8: bound 150bp	23812716	# total reads
Ab 07-030, lot2089140		0.893		86.74	% mapping
		28805331		20654374	# mapped reads
H3K4me3
3K4me3 ChIP 1	SLX-6643; index 10: input 150bp	23751875	SLX-6643; index 8: bound 150bp	30962285	# total reads
Ab8580 Lot GR95388-1		0.8914		0.881	% mapping
		21171240		27277021	# mapped reads
H3K4me3 ChIP 2	SLX-6281, index 1: input 150bp	33675335	SLX-6643; index 1: bound 150bp	31715291	# total reads
Ab8580 Lot GR95388-1		0.8974		0.881	% mapping
		30220166		27277021	# mapped reads
H3K4me3 ChIP 3	SLX-6281, index 11: input 150bp	33772027	SLX-6281, index 10: bound 150bp	22232264	# total reads
		0.8087		0.7391	% mapping
		27310493		16431611	# mapped reads
H3K9me3
H3K9me3 ChIP 1	SLX-6281, index 1: input 150bp	33675335	SLX-6643; index 11: bound 150bp	16521938	# total reads
Ab8898		0.8974		0.7898	% mapping
		30220166		13049763	# mapped reads
H3K9me3 ChIP2	SLX-6643; index 10: input 150bp	23751875	SLX-6515, index 11: bound 150bp	13760213	# total reads
Ab8898		0.8914			% mapping
		21171240			# mapped reads
H3K9me3 ChIP3	SLX-6659, ind8, input 150bp	23659478	SLX-6662, ind11: bound 150bp	4082241	# total reads
Ab8898		0.8968		0.5077	% mapping
		21218507		2072392	# mapped reads
H3K27me3
H3K27me3 ChIP 1	SLX-6281, index 11: input 150bp	33772027	SLX-6281, index 8: bound 150bp	41711670	# total reads
		0.8087		0.846	% mapping
		27310493		35289004	# mapped reads
H3K27me3 ChIP 2	SLX-6659, ind8, input 150bp	23659478	SLX-6659, ind10: bound 150bp	41114269	# total reads
		0.8968		0.8809	% mapping
		21218507		36219117	# mapped reads
H3K27me3 ChIP 1	SLX-6643; index 10: input 150bp	23751875	SLX-6659, ind1: bound 150bp	24593918	# total reads
		0.8914		0.8538	% mapping
		21171240		20998263	# mapped reads

## Sheet: Spermatid ChIP-seq experiments
	Controls – input fraction	Input - # total reads	Bound fraction	Bound - # total reads
H3K4me2
H3K4me2 ChIP 1	SLX-6510, index 1 (150bp input)	31700602	SLX-6512, index 1 (bound 150bp)	25840528	# total reads
Ab 07-030, lot2089140		0.9034		0.8684	% mapping
		28637814		22440531	# mapped reads
H3K4me2 ChIP 2	SLX-6510, index 10 (150bp input)	48923256	SLX-6511, index 10 (bound 150bp)	32207990	# total reads
Ab 07-030, lot2089140		0.9012		0.8804	% mapping
		44088016		28357009	# mapped reads
H3K4me2 ChIP3	SLX-6665, ind 7	33650379	SLX-6665, ind2	27018941	# total reads
Ab 07-030, lot2089140		0.9035		0.8626	% mapping
		30403304		23305332	# mapped reads
H3K4me3
H3K4me3 ChIP 1	SLX-6282, index 1 (150bp input)	29195629	SLX-6282, index 20 (bound 150bp)	6224283	# total reads
CS200580		0.6794		0.5441	% mapping
		19836451		3386836	# mapped reads
H3K4me3 ChIP 2	SLX-6510, index 1	31700602	SLX-6510, index 8	27304329	# total reads
Ab8580,Lot GR95388-1		0.9034		0.8598	% mapping
		28637814		23476018	# mapped reads
H3K4me3 ChIP 3	SLX-6510, index 10	48923256	SLX-6510, index 11	12416496	# total reads
Ab8580,Lot GR95388-1		0.9012		0.7853	% mapping
		44088016		9751070	# mapped reads
H3K9me3
H3K9me3 ChIP1	SLX-6510, index 1	31700602	SLX-6511, index 1	29682592	# total reads
Ab8898		0.9034		0.8092	% mapping
		28637814		24018154	# mapped reads
H3K9me3 ChIP2	SLX-6510, index 10	48923256	SLX-6512, index 10	24552519	# total reads
Ab8898		0.9012		0.817	% mapping
		44088016		20060194	# mapped reads
H3K9me3 ChIP3	SLX-6665, ind7	33650379	SLX-6665, ind4	30006714	# total reads
Ab8898		0.9035		0.8044	% mapping
		30403304		24137647	# mapped reads
H3K27me3
H3K27me3 ChIP 1	SLX-6282, index 1 (150bp input)	29195629	SLX-6282, index 10 (bound 150bp)	22259538	# total reads
Ab 07-449,Lot 2064519		0.6794		0.8615	% mapping
		19836451		19176423	# mapped reads
H3K27me3 ChIP2	SLX-6510, index 10	48923256	SLX-6511, index 11	12043989	# total reads
Jenuwein lab ab		0.9012		0.7072	% mapping
		44088016		8517114	# mapped reads
H3K27me3 ChIP3	SLX-6510, index 1	31700602	SLX-6511, index 8	29318453	# total reads
Ab 07-449,Lot 2064519		0.9034		0.8134	% mapping
		28637814		23848643	# mapped reads

## Sheet: MNase-Seq
			# total reads	% mapped	# mapped reads
SLX-8527	Index 1	spermatid	51854407	0.5812	30137781
SLX-8503	Index 1	spermatid	162825288	0.861	140200633
SLX-8504	Index 10	spermatid	164578110	0.8572	141068170
SLX-8532	Index 11	sperm	95003280	0.6509	61833524
SLX-8507	Index 8	sperm	148070772	0.8468	125387040
SLX-8510	Index 1	sperm	117136730	0.721	84450947
SPERMATID MERGED			379257805	0.8211	311406584
SPERM MERGED			360210782	0.7542	271671511

## Sheet: DNA_methylation
				# reads	% mapped	# reads
SLX-7580	6	Chip-seq	DNA methylation sperm rep1. input	37880900	86.77	32871044
SLX-7580	12	Chip-seq	DNA methylation sperm rep2. input	49919468	87.48	43668541
SLX-7580	13	Chip-seq	DNA methylation sperm rep3. input	54175388	88.29	47830425
SLX-7581	2	Chip-seq	DNA methylation sperm rep1 bound	32601840	75.71	24681858
SLX-7581	7	Chip-seq	DNA methylation sperm rep2 bound	23201496	82.84	19219974
SLX-7581	19	Chip-seq	DNA methylation sperm rep3 bound	36752888	77.06	28320689
SLX-7582	5	Chip-seq	DNA methylation prog rep1 input	60509975	88.62	53621358
SLX-7582	19	Chip-seq	DNA methylation prog rep2 input	40875436	89.06	36404726
SLX-7582	18	Chip-seq	DNA methylation prog rep3 input	31635446	85.48	27041252
SLX-7583	5	Chip-seq	DNA methylation porg rep1 bound	39991068	78.76	31496074
SLX-7583	6	Chip-seq	DNA methylation porg rep2 bound	30760429	79.37	24413913
SLX-7583	15	Chip-seq	DNA methylation porg rep3 bound	37455205	79.98	29956632
