# Supplementary material for: Sperm is epigenetically programmed to regulate gene transcription in embryos
Source: HighWire-hosted journal article supplement (doi:10.1101/gr.201541.115), 2016-03-31
Supplement: Supplemental_Table_S3.xlsx [file Supplemental_Table_S3.xlsx]

## Sheet: Corr_Bound.txt
	H3K4me2_rep1_S_bound	H3K4me2_rep2_S_bound	H3K4me2_rep3_S_bound	H3K4me3_rep1_S_bound	H3K4me3_rep2_S_bound	H3K4me3_rep3_S_bound	H3K27me3_rep1_S_bound	H3K27me3_rep2_S_bound	H3K27me3_rep3_S_bound	H3K4me3_rep1_P_bound	H3K4me3_rep2_P_bound	H3K4me3_rep3_P_bound	H3K27me3_rep1_P_bound	H3K27me3_rep2_P_bound	H3K27me3_rep3_P_bound	H3K4me2_rep1_P_bound	H3K4me2_rep2_P_bound	H3K4me2_rep3_P_bound
H3K4me2_rep1_S_bound	1	0.898754	0.893461	0.588936	0.528641	0.882162	1	0.898754	0.893461	0.760344	0.849737	0.779171	0.223278	0.258951	0.322032	0.795785	0.788919	0.824725
H3K4me2_rep2_S_bound	0.898754	1	0.902005	0.569124	0.509265	0.892037	0.898754	1	0.902005	0.765839	0.83697	0.780126	0.208931	0.248264	0.296522	0.774775	0.777427	0.80967
H3K4me2_rep3_S_bound	0.893461	0.902005	1	0.525124	0.439492	0.896412	0.893461	0.902005	1	0.775341	0.835333	0.762857	0.176184	0.207659	0.230565	0.773426	0.771751	0.832823
H3K4me3_rep1_S_bound	0.588936	0.569124	0.525124	1	0.758851	0.478037	0.588936	0.569124	0.525124	0.403223	0.571617	0.623313	0.427741	0.480845	0.617405	0.377785	0.40153	0.384064
H3K4me3_rep2_S_bound	0.528641	0.509265	0.439492	0.758851	1	0.418094	0.528641	0.509265	0.439492	0.338205	0.517675	0.569087	0.426869	0.467356	0.617006	0.327915	0.349537	0.320077
H3K4me3_rep3_S_bound	0.882162	0.892037	0.896412	0.478037	0.418094	1	0.882162	0.892037	0.896412	0.814342	0.865826	0.775909	0.141479	0.167649	0.187099	0.761999	0.749402	0.805172
H3K27me3_rep1_S_bound	1	0.898754	0.893461	0.588936	0.528641	0.882162	1	0.898754	0.893461	0.760344	0.849737	0.779171	0.223278	0.258951	0.322032	0.795785	0.788919	0.824725
H3K27me3_rep2_S_bound	0.898754	1	0.902005	0.569124	0.509265	0.892037	0.898754	1	0.902005	0.765839	0.83697	0.780126	0.208931	0.248264	0.296522	0.774775	0.777427	0.80967
H3K27me3_rep3_S_bound	0.893461	0.902005	1	0.525124	0.439492	0.896412	0.893461	0.902005	1	0.775341	0.835333	0.762857	0.176184	0.207659	0.230565	0.773426	0.771751	0.832823
H3K4me3_rep1_P_bound	0.760344	0.765839	0.775341	0.403223	0.338205	0.814342	0.760344	0.765839	0.775341	1	0.804983	0.759202	0.115976	0.174337	0.168737	0.73575	0.73163	0.757263
H3K4me3_rep2_P_bound	0.849737	0.83697	0.835333	0.571617	0.517675	0.865826	0.849737	0.83697	0.835333	0.804983	1	0.848378	0.235847	0.281185	0.330655	0.780842	0.775302	0.801517
H3K4me3_rep3_P_bound	0.779171	0.780126	0.762857	0.623313	0.569087	0.775909	0.779171	0.780126	0.762857	0.759202	0.848378	1	0.28803	0.374455	0.421085	0.651688	0.667218	0.673299
H3K27me3_rep1_P_bound	0.223278	0.208931	0.176184	0.427741	0.426869	0.141479	0.223278	0.208931	0.176184	0.115976	0.235847	0.28803	1	0.81563	0.636822	0.177809	0.19846	0.163322
H3K27me3_rep2_P_bound	0.258951	0.248264	0.207659	0.480845	0.467356	0.167649	0.258951	0.248264	0.207659	0.174337	0.281185	0.374455	0.81563	1	0.696743	0.200466	0.230565	0.179565
H3K27me3_rep3_P_bound	0.322032	0.296522	0.230565	0.617405	0.617006	0.187099	0.322032	0.296522	0.230565	0.168737	0.330655	0.421085	0.636822	0.696743	1	0.188485	0.220274	0.158749
H3K4me2_rep1_P_bound	0.795785	0.774775	0.773426	0.377785	0.327915	0.761999	0.795785	0.774775	0.773426	0.73575	0.780842	0.651688	0.177809	0.200466	0.188485	1	0.952821	0.953952
H3K4me2_rep2_P_bound	0.788919	0.777427	0.771751	0.40153	0.349537	0.749402	0.788919	0.777427	0.771751	0.73163	0.775302	0.667218	0.19846	0.230565	0.220274	0.952821	1	0.944167
H3K4me2_rep3_P_bound	0.824725	0.80967	0.832823	0.384064	0.320077	0.805172	0.824725	0.80967	0.832823	0.757263	0.801517	0.673299	0.163322	0.179565	0.158749	0.953952	0.944167	1
		H3K4me2_S			H3K4me3_S			H3K27me3_S			H3K4me3_P			H3K27me3_P			H3K4me2_P
AVERAGE pearson correlation		0.898073			0.551661			0.898073			0.804188			0.716398			0.950313
GLOBAL AVERAGE	0.803118
