# Supplementary material for: Sperm is epigenetically programmed to regulate gene transcription in embryos
Source: HighWire-hosted journal article supplement (doi:10.1101/gr.201541.115), 2016-03-31
Supplement: Supplemental_Table_S4.xlsx [file Supplemental_Table_S4.xlsx]

## Sheet: Summary
	H3K27me3	H3K4me3	H3K4me2	H3K9me3
Sperm GW	5366	2197	21109	857
Sperm Misregulated	35	3	65	5
Spermatid GW	7770	20015	24660	2593
Spermatid Misregulated	43	61	73	7
	H3K27me3	H3K4me3	H3K4me2	H3K9me3
Sperm GW	15.6111	6.39164	61.4116	2.49324
Sperm Misregulated	35	3	65	5
Spermatid GW	22.605	58.2288	71.7424	7.54371
Spermatid Misregulated	43	61	73	7
			Misregulated	GW	Proportion of misregulated with mark	Proportion GW with mark	comparison proportion over misregulated	comparison proportion GW
H3K27me3	10kb upstream - tss+gene body	P	43	7770	43	22.605	0.1551	< 2.2e-16
H3K27me3	10kb upstream - tss+gene body	S	35	5366	35	15.6111
H3K4me3	10kb upstream - tss+2kb	P	61	20015	61	58.2288	< 2.2e-16	< 2.2e-16
H3K4me3	10kb upstream - tss+2kb	S	3	2197	3	6.39164
H3K4me2	10kb upstream - tss+2kb	P	73	24660	73	71.7424	0.1423	< 2.2e-16
H3K4me2	10kb upstream - tss+2kb	S	65	21109	65	61.4116
H3K27me3	10kb upstream - tss+gene body	P	7	2593	7	7.54371	0.3829	< 2.2e-16
H3K27me3	10kb upstream - tss+gene body	S	5	857	5	2.49324

## Sheet: Peaks_around_TSS
	Sperm_H3K27me3_10k_genebody	Sperm_H3K4me2_10k_2k	Sperm_H3K4me3_10k_2k	Sperm_H3K9me2_10k_genebody	Spermatid_H3K27me3_10k_genebody	Spermatid_H3K4me2_10k_2k	Spermatid_H3K4me3_10k_2k	Spermatid_H3K9me2_10k_genebody
ABHD12_Taira201203_XENLA_tissue_00185340	0	1	0	0	0	1	1	0
ACSS1_Taira201203_XENLA_stage_00208921	0	0	0	0	1	1	0	0
ACSS1_Taira201203_XENLA_tissue_00088495	0	0	0	0	1	1	0	0
BC084623.1	0	0	0	0	0	1	0	0
C6ORF125_Ismailoglu201203_XENLA_00031769	0	1	0	0	0	1	1	0
CST7_Kwon201107_XENLA_00100026	0	0	0	0	0	1	0	0
DSTN_XeXenL6RMv10047143m	0	0	0	0	0	0	0	0
GINS1_Taira201203_XENLA_stage_00194386	0	1	0	0	0	1	1	0
MALL_Taira201203_XENLA_tissue_00196673	0	0	0	0	0	0	0	0
MALL_Taira201203_XENLA_tissue_00292841	0	0	0	0	0	0	0	0
MAL_XeXenL6RMv10047157m	0	0	0	0	0	0	0	0
NA_Taira201203_XENLA_tissue_00208123	0	0	0	0	0	1	1	0
NA_XeXenL6RMv10047141m	0	0	0	0	0	1	0	0
NA_XeXenL6RMv10047156m	0	0	0	0	0	0	0	0
NM_001091595.1	1	1	0	0	1	1	1	0
NM_001092033.1	0	1	0	0	0	1	1	0
NP_001027511.1_Park201106_XENLA_00011381	0	1	1	0	0	1	1	0
NP_001027511.1_TeperekTkacz201206_XENLA_00095339	0	1	1	0	0	1	1	0
TPCN1_Ismailoglu201203_XENLA_00041547	0	0	0	0	0	1	0	0
XB-GENE-990109_Taira201203_XENLA_tissue_00142145	0	0	0	0	0	1	1	0
BC078005.1	0	0	0	0	0	0	0	0
BC110973.1	0	0	0	0	0	0	0	0
BC134813.1	0	0	0	0	0	1	0	0
CDC5L_TC415512	0	1	0	0	0	1	1	0
CYP39A1_Taira201203_XENLA_tissue_00160966	0	1	1	0	0	1	1	0
ENPP4_XeXenL6RMv10020775m	0	1	0	0	0	1	1	0
F6WSR4_XENTR_TC419278	0	0	0	0	0	0	0	0
MUT_Park201106_XENLA_00004300	0	1	0	0	0	1	1	0
NM_001093928.1	0	1	0	0	0	1	1	0
NM_001097874.1	0	0	0	0	0	0	0	0
OPN5.2_XeXenL6RMv10020770m	0	0	0	0	0	0	0	0
RCAN2_Taira201203_XENLA_tissue_00119444	0	0	0	0	0	0	0	0
ADAM28_Taira201203_XENLA_tissue_00221945	0	0	0	0	0	0	0	0
ADAM28_Taira201203_XENLA_tissue_00257019	0	0	0	0	0	0	0	0
BC091726.1	0	0	0	0	0	0	0	0
ENTPD4_Park201106_XENLA_00048452	0	1	0	0	0	1	1	0
ENTPD4_Taira201203_XENLA_stage_00159537	0	0	0	0	0	0	0	0
LOXL2_Taira201203_XENLA_stage_00192150	0	0	0	0	0	0	0	0
LOXL2_Taira201203_XENLA_tissue_00095187	0	0	0	0	0	0	0	0
LOXL2_XeXenL6RMv10036005m	0	0	0	0	0	0	0	0
NA_Taira201203_XENLA_tissue_00162231	0	0	0	0	1	0	0	0
NKX2-6_Park201106_XENLA_00089913	1	0	0	0	1	1	0	0
NM_001094883.1	0	1	0	0	0	1	1	0
NP_001233133.1_Kwon201107_XENLA_00026327	0	1	0	0	0	1	1	0
STC1_Kwon201107_XENLA_00059414	0	1	0	0	0	1	1	0
AGPAT5_Ismailoglu201203_XENLA_00041197	0	1	1	0	1	1	1	0
BC100218.1	0	0	0	0	0	1	0	0
NA_XeXenL6RMv10041090m	0	0	0	0	0	0	0	0
TMEM14A_Ismailoglu201203_XENLA_00043693	0	1	0	0	0	1	1	0
TMEM14A_Taira201203_XENLA_tissue_00163487	0	1	0	0	0	1	1	0
AP2S1_Kwon201107_XENLA_00116677	1	1	1	0	1	1	1	0
AP2S1_Taira201203_XENLA_stage_00075064	1	1	1	0	1	1	1	0
ARHGAP35_Taira201203_XENLA_stage_00183480	1	1	0	0	1	1	1	1
ATP11B_Ismailoglu201203_XENLA_00044310	0	1	0	0	0	1	1	0
ATP11C_XeXenL6RMv10002574m	0	1	0	0	0	1	1	0
BC054321.1	0	1	0	0	0	1	1	0
FGF13_XeXenL6RMv10002577m	0	0	0	0	0	1	0	0
NM_001091512.1	1	1	0	0	1	1	1	0
NM_001092624.1	0	1	0	0	0	1	1	0
NM_001095302.1	0	0	0	0	0	0	0	0
NM_001098678.1	0	0	0	0	0	0	0	0
NM_001195385.1	0	0	0	0	0	0	0	0
PPP5C_TC418685	0	1	0	0	0	1	1	0
PTGIR_Taira201203_XENLA_tissue_00018392	0	0	0	0	1	1	0	0
PTGIR_XeXenL6RMv10002566m	0	0	0	0	1	1	0	0
RBMX_Taira201203_XENLA_stage_00060893	1	1	0	0	1	1	1	0
FST_Taira201203_XENLA_stage_00085585	1	0	0	0	1	1	0	1
ISL1_Quigley201112_XENLA_00003115	1	1	0	0	1	1	1	0
ISL1_XeXenL6RMv10005416m	1	1	0	0	1	1	1	0
NDUFS4_TC433566	1	1	0	0	1	1	1	0
NM_001093880.1	0	0	0	0	0	0	0	0
KCTD1_Park201106_XENLA_00114897	1	1	0	0	1	1	1	0
KCTD1_XeXenL6RMv10005963m	0	0	0	0	0	0	0	0
KCTD1_XeXenL6RMv10005964m	1	1	0	0	1	1	1	0
NA_Taira201203_XENLA_tissue_00058115	0	1	0	0	0	1	1	0
SS18_Ismailoglu201203_XENLA_00062904	0	1	0	0	0	1	1	0
ZNF521_Ismailoglu201203_XENLA_00061720	1	1	0	0	1	1	1	0
AF247679.1	0	1	1	0	0	1	1	0
BC155362.1	0	1	0	0	0	1	1	0
C4ORF49_Audic201207_XENLA_00004880	0	1	0	0	0	1	1	0
CCRN4L_Taira201203_XENLA_tissue_00177987	0	1	0	0	0	1	1	0
ELF2_XeXenL6RMv10006492m	0	1	0	0	0	1	1	0
MAML3_Taira201203_XENLA_tissue_00066810	1	1	0	0	1	1	1	0
MAML3_Taira201203_XENLA_tissue_00100570	0	0	0	1	0	1	0	1
MGST2_Ismailoglu201203_XENLA_00019068	0	0	0	0	0	1	0	0
MGST2_Taira201203_XENLA_stage_00148630	0	0	0	0	1	1	1	0
NAA15_XeXenL6RMv10006494m	0	1	1	0	0	1	1	0
NA_Taira201203_XENLA_tissue_00075594	0	1	0	0	0	1	1	0
NA_XeXenL6RMv10006497m	0	1	0	0	0	1	1	0
NM_001091556.1	0	1	0	0	1	1	1	0
NM_001114792.1	0	1	0	0	0	1	1	0
RAB33B_TC422019	1	1	0	0	1	1	1	0
SETD7_Taira201203_XENLA_stage_00077715	0	1	0	0	1	1	1	0
SLC7A11_Taira201203_XENLA_tissue_00189724	0	0	0	0	0	0	0	0
SLC7A11_XeXenL6RMv10006488m	0	0	0	0	0	0	0	0
ABTB2_Park201106_XENLA_00081856	1	1	0	0	1	1	0	0
ABTB2_XeXenL6RMv10007088m	0	0	0	0	0	0	0	0
ASTL_XeXenL6RMv10007109m	0	0	0	0	0	0	0	0
BC082917.1	0	1	0	0	0	1	1	0
BC094096.1	1	1	0	0	0	1	1	0
BC129067.1	0	1	1	0	0	1	1	0
CAPRIN1_TC426229	0	1	0	0	0	1	1	0
CAPRIN1_XeXenL6RMv10007082m	0	1	0	0	0	1	1	0
CCND1_Taira201203_XENLA_stage_00086849	1	1	0	0	1	1	1	0
CCND1_XeXenL6RMv10007102m	1	1	0	0	1	1	1	0
CD59_mgEST_Xl4jul2012_1013089689	0	1	0	0	1	1	1	0
CHST1_Taira201203_XENLA_stage_00141613	0	0	0	0	0	0	0	0
CHST1_XeXenL6RMv10007111m	0	0	0	0	0	0	0	0
CRY2_Taira201203_XENLA_stage_00052852	0	1	0	0	0	1	1	0
CTTN_XeXenL6RMv10007099m	0	0	0	0	0	1	0	0
DDB2_XeXenL6RMv10007079m	0	1	0	0	0	1	1	0
F6ZRI3_XENTR_XeXenL6RMv10007104m	0	1	0	0	0	1	1	0
FADD_Taira201203_XENLA_stage_00181697	0	1	0	0	0	1	1	0
GYLTL1B_Kwon201107_XENLA_00076271	0	1	0	0	0	1	1	0
LMO2_Kwon201107_XENLA_00012553	0	0	0	0	0	1	0	0
MAPK8IP1_Taira201203_XENLA_stage_00029303	0	0	0	0	0	0	0	0
MAPK8IP1_Taira201203_XENLA_stage_00077215	0	0	0	0	0	0	0	0
NA_Kwon201107_XENLA_00006034	1	1	0	0	0	1	1	0
NAT10_Ismailoglu201203_XENLA_00060839	0	1	0	0	0	1	1	0
NAT10_Ismailoglu201203_XENLA_00061999	0	0	0	0	0	0	0	0
NM_001086776.1	1	1	0	0	1	1	1	0
NM_001087075.1	0	1	0	0	0	1	1	0
NM_001088989.1	0	0	0	0	0	1	0	0
NM_001092402.1	0	1	0	0	0	1	1	0
NM_001095939.1	0	1	0	0	0	1	1	0
NM_001095940.1	0	1	0	0	0	1	1	0
NM_001096408.1	0	1	0	0	0	1	1	0
NM_001099877.1	0	0	0	0	0	0	0	0
NP_001120406.1_XeXenL6RMv10007105m	0	1	0	0	0	1	0	0
PHF21A_TeperekTkacz201206_XENLA_00085951	0	0	0	0	0	0	0	0
PHF21A_XeXenL6RMv10007118m	0	0	0	0	0	0	0	0
PPFIA1_Park201106_XENLA_00020638	0	0	0	0	0	0	0	0
RDM1_Kwon201107_XENLA_00122347	0	1	0	0	0	1	1	0
RDM1_Taira201203_XENLA_tissue_00167800	0	1	0	0	0	1	1	0
SHANK2_Taira201203_XENLA_stage_00065549	1	1	0	0	1	1	0	1
SLC35C1_Quigley201207_XENLA_00092997	0	1	0	0	0	1	1	0
TFIP11_Kwon201107_XENLA_00023587	0	1	0	0	0	1	1	0
TFIP11_Park201106_XENLA_00034923	0	1	0	0	0	1	1	0
TLL1_XeXenL6RMv10007106m	0	0	0	0	0	1	0	0
BC077496.1	0	1	0	0	0	1	1	0
CDCA7_Taira201203_XENLA_stage_00211711	0	1	0	0	0	1	1	0
CHRNA1.2_Taira201203_XENLA_stage_00215947	0	0	0	0	0	1	0	0
CIR1_Taira201203_XENLA_stage_00034598	0	1	0	0	0	1	1	0
NA_XeXenL6RMv10007326m	0	0	0	1	0	0	0	1
NM_001086132.1	0	0	0	0	0	0	0	0
NM_001086211.1	0	1	0	0	1	1	1	0
NM_001097814.1	0	1	0	0	0	1	1	0
NM_001112844.1	0	1	0	0	0	1	1	0
RAPGEF4_Taira201203_XENLA_stage_00184576	0	0	0	0	1	0	0	0
RAPGEF4_Taira201203_XENLA_tissue_00022728	0	0	0	1	1	1	0	0
SP3_Quigley201207_XENLA_00068498	0	1	0	0	1	1	1	0
SP9_Taira201203_XENLA_tissue_00169645	1	1	0	0	1	1	1	0
WIPF1_Taira201203_XENLA_tissue_00150159	1	1	0	0	1	1	1	0
WIPF1_Taira201203_XENLA_tissue_00153542	1	1	0	0	1	1	1	0
ZAK_Taira201203_XENLA_tissue_00145376	1	1	0	0	1	1	1	0
C1ORF131_Park201106_XENLA_00100893	0	1	0	0	0	1	1	0
GNPAT_XeXenL6RMv10013544m	0	1	0	0	0	1	1	0
NM_001092675.1	0	1	0	0	0	1	1	0
FAM190A_Taira201203_XENLA_tissue_00078113	1	0	0	1	1	0	0	1
FAM190A_Taira201203_XENLA_tissue_00157545	0	0	0	0	0	0	0	0
BC054264.1	0	1	0	0	0	1	1	0
C7ORF70_Taira201203_XENLA_stage_00093535	0	1	1	0	1	1	1	0
DAGLB_TeperekTkacz201206_XENLA_00050096	0	0	0	0	0	0	0	0
DAGLB_XeXenL6RMv10016276m	0	1	0	0	0	1	1	0
BC078489.1	0	0	0	0	0	0	0	0
BC106516.1	0	1	0	0	0	1	1	0
BRWD1_Taira201203_XENLA_stage_00089619	0	1	0	0	0	1	1	0
NA_Taira201203_XENLA_tissue_00148546	0	0	0	0	0	0	0	0
NM_001088036.1	1	1	0	0	1	1	1	0
NM_001095107.1	0	0	0	0	0	0	0	0
NM_001095948.1	0	1	0	0	0	1	1	0
PCP4_Taira201203_XENLA_tissue_00173071	0	0	0	0	0	0	0	0
PCP4_Taira201203_XENLA_tissue_00204575	0	0	0	0	0	0	0	0
SH3BGR_Audic201207_XENLA_00002451	0	0	0	0	0	0	0	0
XB-GENE-992031_Taira201203_XENLA_tissue_00130087	0	0	0	0	0	0	0	0
EPHA3_XeXenL6RMv10022154m	0	0	0	0	0	0	0	0
NM_001091189.1	0	0	0	0	0	0	0	0
PROS1_Taira201203_XENLA_tissue_00168898	0	1	1	0	0	1	1	0
STX19_Taira201203_XENLA_tissue_00235164	0	0	0	0	0	0	0	0
AF154557.1	1	0	0	0	1	0	0	0
AF154558.1	1	0	0	0	1	1	0	0
EIF3M_Taira201203_XENLA_stage_00006851	0	1	0	0	0	1	0	1
EIF3M_Taira201203_XENLA_stage_00052442	0	1	0	0	0	1	0	1
NA_XeXenL6RMv10022930m	0	0	0	0	0	0	0	0
NM_001085867.1	1	1	0	0	1	1	1	0
NM_001085944.1	1	0	0	0	1	0	0	0
RCN1_Ismailoglu201203_XENLA_00065294	0	1	0	0	0	1	1	0
RCN1_TC459427	0	1	0	0	0	1	1	0
U67887.1	1	0	0	0	1	0	0	0
WT1_Amin201106_XENLA_00010946	1	0	0	0	1	1	0	0
ABCA3_Park201106_XENLA_00004925	0	1	0	0	0	1	1	0
ABCA3_XeXenL6RMv10023502m	0	0	0	0	0	0	0	0
ANKFN1_Quigley201112_XENLA_00131045	0	1	0	0	0	1	1	0
ANKFN1_XeXenL6RMv10023517m	0	1	0	0	0	1	0	0
ATP6V0C_Kwon201107_XENLA_00123849	0	1	0	0	0	1	1	0
BC079725.1	0	0	0	0	0	0	0	0
BC155897.1	0	1	1	0	1	1	1	0
C16ORF11_Taira201203_XENLA_tissue_00017631	0	0	0	0	0	0	0	0
C16ORF11_Taira201203_XENLA_tissue_00063200	0	0	0	0	0	0	0	0
CCNF_Kwon201107_XENLA_00121218	0	1	0	0	0	1	1	0
COG7_Kwon201107_XENLA_00057651	0	1	0	0	0	1	1	0
COG7_XeXenL6RMv10023527m	0	1	0	0	0	1	1	0
CRAMP1L_Kwon201107_XENLA_00052998	0	1	0	0	0	1	1	0
CRAMP1L_XeXenL6RMv10023499m	0	1	0	0	0	1	1	0
EARS2_Taira201203_XENLA_stage_00169233	0	1	0	0	0	1	1	0
ERN2_XeXenL6RMv10023488m	0	1	0	0	0	1	1	0
GLIS2_Audic201207_XENLA_00000197	1	1	0	0	0	1	0	0
HM535699.1	0	0	0	0	0	1	0	0
HN1L_Ismailoglu201203_XENLA_00025341	0	1	0	0	0	1	1	0
LOC398404_XeXenL6RMv10023491m	1	1	0	0	1	1	1	0
MAPK8IP3_Taira201203_XENLA_stage_00048715	1	0	0	0	0	1	0	0
MAPK8IP3_XeXenL6RMv10023521m	0	0	0	0	0	0	0	0
MRPS34_Ismailoglu201203_XENLA_00051641	0	1	1	0	0	1	1	0
NA_Ismailoglu201203_XENLA_00043257	0	0	0	1	0	0	0	1
NA_XeXenL6RMv10023509m	0	0	0	0	0	0	0	1
NM_001085971.1	0	1	0	0	0	1	1	0
NM_001087319.1	1	1	0	0	1	1	1	0
NM_001092180.1	0	1	0	0	0	1	1	0
NM_001094158.1	0	1	0	0	0	1	1	0
NM_001094910.1	0	1	1	0	0	1	1	0
NM_001095136.1	0	1	0	0	0	1	1	0
NM_001096816.1	0	1	1	0	1	1	1	0
NM_001097869.1	0	1	0	0	0	1	1	0
NME4_XeXenL6RMv10023481m	0	1	0	0	0	1	1	0
NOG2_Taira201203_XENLA_tissue_00237255	0	0	0	0	0	0	0	0
NP_001123841.1_TeperekTkacz201206_XENLA_00056846	0	1	0	0	0	1	1	0
NTN3_Taira201203_XENLA_stage_00091198	0	0	0	0	0	0	0	0
NTN3_TeperekTkacz201202_XENLA_00154497	0	0	0	0	0	0	0	0
PALB2_Ismailoglu201203_XENLA_00006866	0	0	0	0	0	0	0	0
PAM16_Park201106_XENLA_00176570	0	1	1	0	1	1	1	0
PIGQ_Taira201203_XENLA_tissue_00042266	0	0	0	0	0	0	0	0
PIGQ_XeXenL6RMv10023487m	0	1	0	0	0	1	1	0
PLK1_TeperekTkacz201206_XENLA_00065183	1	1	0	0	1	1	1	0
SOLH_XeXenL6RMv10023484m	0	1	0	0	0	1	0	0
TMEM204_Taira201203_XENLA_stage_00159540	0	0	0	0	0	0	0	0
TMEM204_XeXenL6RMv10023498m	0	0	0	0	0	0	0	0
TRAP1_TC426282	0	1	0	0	0	1	1	0
TRAP1_XeXenL6RMv10023477m	0	1	0	0	0	1	1	0
UBFD1_Taira201203_XENLA_stage_00123195	0	1	0	0	0	1	1	0
UBFD1_XeXenL6RMv10023524m	0	1	0	0	0	1	1	0
VASN_Taira201203_XENLA_stage_00208009	0	1	0	0	0	1	0	0
XPO6_XeXenL6RMv10023480m	0	1	0	0	0	1	1	0
BC073029.1	1	0	0	0	1	1	0	0
BC076842.1	1	1	0	0	1	1	1	0
CA13_XeXenL6RMv10027903m	0	0	0	0	0	1	0	0
CA2_Taira201203_XENLA_tissue_00124895	1	1	0	0	1	1	1	1
CHMP4C_Kwon201107_XENLA_00136383	0	0	0	0	0	1	0	0
CHMP4C_Taira201203_XENLA_stage_00217126	0	0	0	0	0	1	0	0
CPNE3_Quigley201112_XENLA_00047415	0	0	0	0	0	0	0	0
E2F5_TC441097	0	1	0	0	0	1	1	0
FABP4_Taira201203_XENLA_tissue_00253776	1	0	0	0	1	1	0	0
FABP4_TC439887	1	0	0	0	1	1	0	0
FAM82B_XeXenL6RMv10027898m	0	1	0	0	0	1	1	0
IMPA1_XeXenL6RMv10027921m	0	0	0	0	0	1	0	0
MMP16_Taira201203_XENLA_stage_00043761	0	0	0	0	0	0	0	1
NA_Amin201106_XENLA_00022297	0	1	1	0	0	1	1	0
NA_Ismailoglu201203_XENLA_00034364	0	1	1	0	0	1	1	0
NA_XeXenL6RMv10027905m	0	1	1	0	0	1	1	0
NA_XeXenL6RMv10027920m	0	0	0	0	0	0	0	0
NM_001089793.1	0	0	0	0	0	1	0	0
NM_001092654.1	0	1	0	0	0	1	1	0
PAG1_XeXenL6RMv10027926m	0	0	0	0	0	0	0	0
PMP2_Taira201203_XENLA_tissue_00089847	1	1	0	0	1	1	0	0
PSKH2_TeperekTkacz201202_XENLA_00012366	0	0	0	0	0	1	0	0
PSKH2_XeXenL6RMv10027901m	0	0	0	0	0	1	0	0
RALYL_Taira201203_XENLA_tissue_00049970	0	0	0	0	1	0	0	0
RALYL_Taira201203_XENLA_tissue_00181128	0	0	0	0	0	0	0	0
SNX16_XeXenL6RMv10027917m	0	1	0	0	0	1	1	0
WWP1_XeXenL6RMv10027900m	0	0	0	0	0	0	0	0
BET1L_Taira201203_XENLA_stage_00050518	0	1	0	0	0	1	1	0
BET1L_Taira201203_XENLA_tissue_00067939	0	1	0	0	0	1	1	0
DAK_Ismailoglu201203_XENLA_00004904	0	0	0	0	0	0	0	1
FUT5_Taira201203_XENLA_tissue_00189642	0	0	0	0	0	1	0	0
NA_Ismailoglu201203_XENLA_00014139	0	1	0	0	1	1	1	0
NA_Park201106_XENLA_00128986	0	1	0	0	0	1	1	0
NA_Taira201203_XENLA_tissue_00215318	0	1	0	0	1	1	1	0
NM_001090155.1	0	1	0	0	0	1	1	0
PPP6R3_XeXenL6RMv10028795m	0	0	0	0	0	0	0	0
PSMD13_Taira201203_XENLA_tissue_00275479	0	1	0	0	0	1	1	0
PSMD13_TeperekTkacz201202_XENLA_00009734	0	1	0	0	0	1	1	0
PTS_Quigley201207_XENLA_00031350	0	0	0	0	0	1	0	0
PTS_XeXenL6RMv10028786m	0	0	0	0	0	1	0	0
SIRT3_Amin201106_XENLA_00031796	0	1	0	0	0	1	1	0
SYT7_XeXenL6RMv10028784m	0	0	0	0	0	1	0	0
ALG2_Audic201207_XENLA_00001739	0	1	0	0	0	1	1	0
ANLN_XeXenL6RMv10030039m	0	1	0	0	0	1	1	0
BC041270.1	0	1	0	0	0	1	1	0
BC073063.1	0	1	0	0	0	1	1	0
CCR3_Taira201203_XENLA_tissue_00124614	0	0	0	0	0	1	0	0
CCR9_XeXenL6RMv10030013m	0	0	0	0	0	0	0	0
CDK13_Kwon201107_XENLA_00107424	0	1	1	0	0	1	1	0
EEPD1_Taira201203_XENLA_tissue_00095277	0	1	0	0	0	1	0	0
ERP44_Kwon201107_XENLA_00011167	0	1	0	0	0	1	1	0
HERPUD2_Taira201203_XENLA_tissue_00007691	0	1	0	0	0	1	1	0
KIAA0895_Taira201203_XENLA_tissue_00227119	0	0	0	0	0	1	0	0
LZTFL1_Quigley201207_XENLA_00098600	0	1	0	0	0	1	1	0
NA_XeXenL6RMv10030007m	0	1	0	0	0	1	0	0
NM_001086687.1	0	1	0	0	0	1	1	0
NM_001092805.1	0	1	0	0	0	1	1	0
NM_001097866.1	0	1	0	0	0	1	1	0
NP_001016606.1_TC419169	0	1	0	0	0	1	1	0
RALA_XeXenL6RMv10030025m	0	1	0	0	0	1	1	0
SACM1L_Taira201203_XENLA_stage_00056281	0	1	0	1	0	1	1	1
SEPT7_Park201106_XENLA_00080902	0	1	0	0	0	1	1	0
SEPT7_TeperekTkacz201206_XENLA_00087419	0	0	0	0	0	1	0	0
SLC6A20_XeXenL6RMv10029997m	0	1	0	1	0	1	1	0
SNRPD1_Taira201203_XENLA_stage_00141802	0	1	1	0	0	1	1	0
SNRPD1_TeperekTkacz201202_XENLA_00144240	0	1	1	0	0	1	1	0
TBX20_Amin201106_XENLA_00028934	1	1	0	0	1	1	1	0
YAE1D1_Taira201203_XENLA_tissue_00257336	0	1	0	0	0	1	1	0
4930452B06RIK_Quigley201112_XENLA_00014214	0	1	0	0	0	1	1	0
GPR63_Taira201203_XENLA_tissue_00163631	0	1	0	0	0	1	1	0
MYO1C_Kwon201107_XENLA_00048539	0	1	0	0	1	1	1	0
MYO1C_Taira201203_XENLA_stage_00080701	0	1	0	0	1	1	1	0
PITPNA_Ismailoglu201203_XENLA_00062708	1	1	0	0	1	1	1	0
PITPNA_Quigley201207_XENLA_00118629	1	1	0	0	1	1	1	0
ANK1_Taira201203_XENLA_tissue_00149022	0	0	0	0	0	1	0	0
ANK1_Taira201203_XENLA_tissue_00253411	0	0	0	1	0	0	0	0
ANK1_XeXenL6RMv10038522m	0	0	0	0	0	0	0	0
IKBKB_TeperekTkacz201202_XENLA_00064828	0	1	0	0	0	1	1	0
INPP5A.2_Park201106_XENLA_00176090	0	0	0	0	0	0	0	0
INPP5A.2_XeXenL6RMv10038519m	0	0	0	0	0	0	0	0
INPP5A_TeperekTkacz201206_XENLA_00020911	0	0	0	0	0	0	0	0
KAT6A_Taira201203_XENLA_stage_00203908	0	1	0	0	0	1	1	0
KAT6A_XeXenL6RMv10038525m	0	1	0	0	0	1	1	0
NA_mgEST_Xl4jul2012_1013088149	0	0	0	0	0	0	0	0
NKX6-3_Taira201203_XENLA_tissue_00096689	0	0	0	0	0	1	0	0
NM_001091656.1	0	1	0	0	0	1	1	0
NM_001091887.1	0	1	0	0	0	1	1	0
PLAT_TC417445	0	0	0	0	0	0	0	0
ACOXL_TeperekTkacz201202_XENLA_00111757	0	1	0	0	0	1	1	1
AF348328.1	0	1	0	0	0	1	1	0
BC077250.1	0	1	0	0	0	1	1	0
BC108813.1	0	0	0	0	0	0	0	0
DSTN_Taira201203_XENLA_tissue_00204154	0	0	0	0	0	0	0	0
NKX2-4_Taira201203_XENLA_stage_00094853	1	0	0	0	1	1	0	0
NM_001088647.1	0	1	0	0	0	1	1	0
NM_001096277.1	1	1	0	0	1	1	1	0
NP_001027511.1_Taira201203_XENLA_stage_00021510	1	1	0	0	1	1	1	0
ACAD10_Taira201203_XENLA_tissue_00236804	0	1	0	0	0	1	1	0
ACAD10_XeXenL6RMv10040202m	0	1	0	0	0	1	1	0
ALDH2_Kwon201107_XENLA_00098201	0	1	0	0	0	1	1	0
ALDH2_Taira201203_XENLA_tissue_00230677	0	1	0	0	0	1	1	0
ANAPC7_Ismailoglu201203_XENLA_00049513	0	1	0	0	0	1	1	0
ATP2A3_TeperekTkacz201206_XENLA_00052061	1	0	0	0	1	1	0	0
BC094170.1	0	0	0	0	0	0	0	0
BRAP_XeXenL6RMv10040203m	0	1	0	0	0	1	1	0
C12ORF49_Taira201203_XENLA_stage_00130446	0	1	0	0	0	1	1	0
CUX2_Taira201203_XENLA_tissue_00101399	0	0	0	0	0	0	0	0
CUX2_XeXenL6RMv10040215m	0	0	0	0	0	0	0	0
FAM109A_TeperekTkacz201202_XENLA_00112113	1	1	0	0	1	1	1	0
FBXW8_XeXenL6RMv10040245m	1	1	0	0	1	1	1	0
GPN3_Kwon201107_XENLA_00131953	0	1	0	0	0	1	1	0
MAPKAPK5_Kwon201107_XENLA_00135094	0	1	0	0	0	1	1	0
NAA25_Ismailoglu201203_XENLA_00046377	0	1	0	0	0	1	1	0
NA_XeXenL6RMv10040189m	1	1	0	0	1	1	1	0
NA_XeXenL6RMv10040228m	0	0	0	0	0	0	0	0
NM_001086585.1	0	1	0	0	0	1	1	0
NM_001087839.1	0	1	0	0	0	1	1	0
NM_001090983.1	0	1	0	0	0	1	1	0
NM_001094749.1	1	1	0	0	1	1	1	0
NM_001095406.1	0	1	0	0	0	1	1	0
NM_001096011.1	0	1	0	0	0	1	1	0
PPTC7_Amin201106_XENLA_00075636	0	1	0	0	0	1	1	0
PPTC7_Ismailoglu201203_XENLA_00002961	0	1	0	0	0	1	1	0
RAD9B_Taira201203_XENLA_tissue_00284649	0	1	0	0	0	1	1	0
RNFT2_Taira201203_XENLA_tissue_00048185	0	1	0	0	1	1	1	0
RPH3A_XeXenL6RMv10040232m	0	0	0	0	1	1	0	1
RPL6_Taira201203_XENLA_stage_00074046	0	1	1	0	0	1	1	0
RPL6_Taira201203_XENLA_stage_00172730	0	1	1	0	0	1	1	0
SH2B3_Ismailoglu201203_XENLA_00052335	1	1	0	0	1	1	1	0
SH2B3_Taira201203_XENLA_tissue_00067391	1	1	0	0	1	1	1	0
TCTN1_mgEST_Xl4jul2012_1013157626	0	1	1	0	0	1	1	0
TMEM116_Taira201203_XENLA_stage_00086462	1	1	0	0	1	1	1	0
TRAFD1_Taira201203_XENLA_stage_00082059	0	1	0	0	0	1	1	0
VPS29_Amin201106_XENLA_00060593	0	1	0	0	0	1	1	0
WSCD2_Kwon201107_XENLA_00016187	0	0	0	0	0	0	0	0
ACTN1_Chung201110_XENLA_00071555	1	1	0	0	1	1	1	0
BAZ1A_Taira201203_XENLA_tissue_00091551	0	1	0	0	0	1	1	0
BC091713.1	0	1	0	0	0	1	1	0
BC108837.1	0	0	0	0	0	0	0	0
BRMS1L_Taira201203_XENLA_tissue_00255920	0	1	0	0	0	1	1	0
CAPN3_Taira201203_XENLA_tissue_00075504	0	1	0	0	1	1	0	0
CAPN3_TC421562	0	0	0	0	0	1	0	0
CAPN3_XeXenL6RMv10041363m	0	1	0	0	1	1	0	0
DCAF5_XeXenL6RMv10041344m	0	1	0	0	0	1	1	0
EAPP_Taira201203_XENLA_tissue_00152938	0	1	0	0	0	1	1	0
EAPP_TeperekTkacz201202_XENLA_00009952	0	1	0	0	0	1	1	0
ERH_Taira201203_XENLA_stage_00072958	0	1	0	0	0	1	1	0
EXD2_XeXenL6RMv10041342m	0	1	0	0	0	1	1	0
F6YKD3_XENTR_Taira201203_XENLA_tissue_00187634	0	0	0	0	0	0	0	0
F6YKD3_XENTR_XeXenL6RMv10041349m	0	0	0	0	0	0	0	0
FAM177A1_Ismailoglu201203_XENLA_00038549	0	1	0	0	0	1	1	0
GALNTL1_mgEST_Xl4jul2012_1013112247	0	1	0	0	0	1	1	1
GALNTL1_TC415558	0	1	0	0	0	1	1	1
KIAA0391_Ismailoglu201203_XENLA_00051361	0	1	0	0	0	1	1	0
MBIP_Ismailoglu201203_XENLA_00070149	0	1	0	0	0	1	1	0
MBIP_TeperekTkacz201202_XENLA_00110499	0	1	0	0	0	1	1	0
MIPOL1_Taira201203_XENLA_tissue_00069529	0	0	0	0	0	0	0	0
MIPOL1_XeXenL6RMv10041367m	0	0	0	0	0	0	0	0
MIPOL1_XeXenL6RMv10041368m	0	0	0	0	0	0	0	0
NA_XeXenL6RMv10041348m	0	1	0	0	0	1	1	0
NFKBIA_Taira201203_XENLA_tissue_00010276	1	1	0	0	1	1	1	0
NFKBIA_Taira201203_XENLA_tissue_00053064	1	1	0	0	1	1	1	0
NKX2-1_Taira201203_XENLA_tissue_00212764	1	1	0	0	1	1	1	1
NKX2-8_Taira201203_XENLA_stage_00094687	0	0	0	0	0	0	0	0
NM_001089745.1	0	1	0	0	0	1	1	0
NM_001093316.1	0	1	0	0	0	1	1	0
NM_001093442.1	0	1	0	0	0	1	1	0
NM_001093529.1	1	1	0	0	1	1	1	0
NM_001094702.1	0	0	0	0	0	0	0	0
NM_001097123.1	0	1	0	0	0	1	1	0
NM_001171729.1	0	1	0	0	0	1	1	0
NM_001174014.1	1	1	0	0	1	1	1	0
PPP2R3C_Taira201203_XENLA_stage_00001851	0	1	0	0	0	1	1	0
PSMA6_TeperekTkacz201202_XENLA_00007857	0	1	0	0	0	1	1	0
RALGAPA1_TeperekTkacz201206_XENLA_00020245	0	1	0	0	0	1	1	0
RALGAPA1_XeXenL6RMv10041375m	0	0	0	0	0	0	0	0
SLC25A21_Ismailoglu201203_XENLA_00038657	1	0	0	0	1	1	0	0
SLC39A9_TC414852	0	1	0	0	0	1	1	0
SNX6_Quigley201207_XENLA_00081702	0	1	0	0	0	1	1	0
SNX6_Taira201203_XENLA_stage_00059888	0	1	0	0	0	1	1	0
TTC6_Taira201203_XENLA_tissue_00077527	1	1	1	0	1	1	1	0
ZFP106_TeperekTkacz201206_XENLA_00063270	0	0	0	0	0	0	0	0
ZFP106_XeXenL6RMv10041380m	0	0	0	0	0	0	0	0
BACE1_Taira201203_XENLA_tissue_00134555	0	1	0	0	0	1	1	0
CEP164_Taira201203_XENLA_stage_00208266	0	1	0	0	0	1	1	0
DSCAML1_Kwon201107_XENLA_00115551	1	1	0	0	1	1	0	0
DSCAML1_XeXenL6RMv10042235m	0	0	0	0	0	0	0	0
FXYD2_Taira201203_XENLA_tissue_00037917	0	1	0	0	0	1	0	0
NA_Taira201203_XENLA_tissue_00011898	0	0	0	0	0	0	0	0
NA_TC437133	0	0	0	0	0	0	0	0
NA_XeXenL6RMv10042237m	0	0	0	0	0	0	0	0
NM_001086263.1	0	0	0	0	0	0	0	0
NM_001092939.1	0	0	0	0	1	0	0	0
NM_001095041.1	0	0	0	0	0	0	0	0
PAFAH1B2_Taira201203_XENLA_tissue_00153320	0	1	0	0	0	1	1	0
PAFAH1B2_Taira201203_XENLA_tissue_00291773	0	1	0	0	0	1	1	0
SIK3_XeXenL6RMv10042247m	0	1	0	0	0	1	0	0
TMPRSS13_Taira201203_XENLA_tissue_00162670	0	0	0	0	0	1	0	0
AB037146.1	0	1	0	0	1	1	1	0
ADH5_XeXenL6RMv10043849m	0	1	0	0	0	1	1	0
ADH7_mgEST_Xl4jul2012_1013094861	0	0	0	0	0	1	0	0
BC088824.1	0	1	0	0	0	1	1	0
BC091706.1	1	1	0	0	1	1	1	0
BC099347.1	0	1	0	0	0	1	0	0
D31837.1	0	1	0	0	0	1	1	0
DAPP1_Taira201203_XENLA_stage_00164591	0	0	0	0	0	0	0	0
DNAJB14_Chung201110_XENLA_00014936	0	1	0	0	0	1	1	0
DNAJB14_Taira201203_XENLA_stage_00050695	0	1	0	0	0	1	1	0
F1NI97_CHICK_Taira201203_XENLA_stage_00200934	0	0	0	0	0	0	0	0
F6Q9D4_XENTR_Taira201203_XENLA_tissue_00251445	0	0	0	0	0	0	0	0
H2AFZ_Ismailoglu201203_XENLA_00020584	0	1	0	0	0	1	1	0
METAP1_Ismailoglu201203_XENLA_00008927	0	1	0	0	0	1	1	0
METAP1_TeperekTkacz201206_XENLA_00075162	0	1	0	0	0	1	1	0
MTTP.1_Taira201203_XENLA_tissue_00211702	0	1	0	0	1	1	0	0
NA_Amin201106_XENLA_00005878	0	0	0	0	1	0	0	0
NA_XeXenL6RMv10043842m	0	1	0	0	0	1	0	0
NM_001087175.1	0	1	0	0	0	1	1	0
NM_001090095.1	0	0	0	0	0	0	0	0
NM_001093434.1	0	0	0	0	0	1	0	0
NM_001095297.1	0	1	0	0	0	1	1	0
NM_001095625.1	0	0	0	0	0	1	0	0
NP_001011431.1_XeXenL6RMv10043856m	0	0	0	0	0	1	0	0
PPP3CA_TC416642	0	1	0	0	1	1	1	0
RAP1GDS1_Taira201203_XENLA_tissue_00072815	0	1	0	0	0	1	1	0
RP11-766F14.2.1_XeXenL6RMv10043860m	1	1	0	0	1	1	1	0
TSPAN5_TC418823	1	1	0	0	1	1	1	0
ACP5_Audic201207_XENLA_00003517	0	0	0	0	0	1	0	0
BC075181.1	0	1	0	0	0	1	1	0
CNN2_TC422916	0	0	0	0	1	0	0	0
DAND5_TeperekTkacz201202_XENLA_00021005	0	0	0	0	0	0	0	0
ECSIT_Kwon201107_XENLA_00003277	0	1	0	0	0	1	1	0
ELOF1_TC446117	0	1	0	0	0	1	1	0
LYL1_Taira201203_XENLA_tissue_00175656	0	0	0	0	0	1	0	0
NFIX_mgEST_Xl4jul2012_1013103803	0	0	0	0	0	0	0	0
NFIX_XeXenL6RMv10044255m	0	0	0	0	0	0	0	0
NM_001090689.1	0	0	0	0	0	0	0	0
NM_001098726.1	0	0	0	0	0	0	0	0
NM_001127808.1	0	1	0	0	0	1	1	0
TMEM56.2_Park201106_XENLA_00044417	0	1	0	0	0	1	1	0
ZNF653_XeXenL6RMv10044266m	0	1	0	0	0	1	1	0
MAD2L1_XeXenL6RMv10044449m	0	1	0	0	0	1	1	0
E2F8_TeperekTkacz201206_XENLA_00094528	0	0	0	0	0	1	0	0
HTATIP2_Ismailoglu201203_XENLA_00017180	1	1	0	0	1	1	1	0
NAV2_Taira201203_XENLA_stage_00210748	0	0	0	0	0	0	0	0
ZDHHC13_Quigley201207_XENLA_00099236	0	1	0	0	1	1	1	0
NA_XeXenL6RMv10045631m	0	0	0	0	0	0	0	0
SKI_TC429969	0	1	0	0	0	1	1	0
CANX_Kwon201107_XENLA_00131741	0	1	0	0	0	1	1	0
CNOT8_XeXenL6RMv10046560m	0	1	0	0	0	1	1	0
LARP1_Taira201203_XENLA_stage_00130718	0	1	0	0	1	1	1	0
NM_001085659.1	0	0	0	0	0	0	0	0
NM_001096355.1	0	0	0	0	0	1	0	0
BC091650.1	0	1	1	0	0	1	1	0
CGN_Ismailoglu201203_XENLA_00061420	0	1	1	0	0	1	1	0
NM_001087421.1	0	1	0	1	0	1	1	0
NM_001088501.1	0	1	1	0	0	1	1	0
NM_001091204.1	0	1	0	0	0	1	1	0
NM_001095927.1	0	0	0	1	0	0	0	0
POGZ_Taira201203_XENLA_stage_00200055	0	1	0	0	0	1	1	0
RFX5_Park201106_XENLA_00106197	0	1	0	0	0	1	1	0
RFX5_Taira201203_XENLA_stage_00126025	0	1	0	0	0	1	1	0
AFF3_Kwon201107_XENLA_00095067	0	0	0	0	0	0	0	0
AFF3_XeXenL6RMv10046716m	0	0	0	0	0	1	0	0
BC081143.1	0	1	0	0	0	1	1	0
C17ORF105_Quigley201112_XENLA_00063368	1	1	0	0	1	1	0	0
C17ORF105_Taira201203_XENLA_stage_00133968	0	0	0	0	0	0	0	0
EIF5B_XeXenL6RMv10046713m	0	1	0	0	0	1	1	0
FAM70B_Taira201203_XENLA_tissue_00209849	1	0	0	0	1	1	0	0
FAM70B_XeXenL6RMv10046721m	1	0	0	0	1	1	0	0
GAS6_XeXenL6RMv10046723m	1	1	0	0	1	1	1	0
LONRF2_Taira201203_XENLA_stage_00075106	0	1	0	0	0	1	1	1
NA_Taira201203_XENLA_tissue_00125343	0	0	0	0	0	0	0	0
NM_001089688.1	1	1	0	0	1	1	1	0
NM_001093333.1	1	1	0	0	1	1	1	0
REV1_Taira201203_XENLA_stage_00190129	0	1	0	0	0	1	1	0
ARHGAP44_Taira201203_XENLA_stage_00053072	0	0	0	0	0	0	0	0
ARHGAP44_Taira201203_XENLA_stage_00059726	0	0	0	0	0	0	0	1
ARHGAP44_XeXenL6RMv10047016m	0	0	0	0	0	0	0	0
AXIN2_Taira201203_XENLA_tissue_00033830	0	1	0	0	1	1	0	0
BC047981.1	0	1	1	0	0	1	1	0
BC070662.1	1	1	0	0	1	1	1	0
BC087467.1	0	1	0	0	0	1	1	0
BPTF_Kwon201107_XENLA_00090595	0	1	0	0	0	1	1	1
CACNG1_Taira201203_XENLA_stage_00054825	1	0	0	0	1	0	0	0
CACNG1_Taira201203_XENLA_stage_00088812	1	0	0	0	1	0	0	0
CACNG4_mgEST_Xl4jul2012_1013119715	1	1	0	0	1	1	1	0
CACNG4_XeXenL6RMv10046965m	1	1	0	0	1	1	1	0
CACNG5_XeXenL6RMv10046967m	0	0	0	0	0	1	0	0
DDX5_Quigley201207_XENLA_00036650	0	1	1	0	0	1	1	0
DDX5_Quigley201207_XENLA_00065058	0	1	1	0	0	1	1	0
ERN1_Kwon201107_XENLA_00023743	1	0	0	0	1	0	0	0
ERN1_Kwon201107_XENLA_00119442	1	0	0	0	1	1	0	0
FAM20A_Horb201201_XENLA_00070993	1	1	0	0	1	1	1	1
FAM20A_Park201106_XENLA_00172537	1	1	0	0	1	1	1	1
GAS7_Ismailoglu201203_XENLA_00001347	0	0	0	0	0	1	0	0
GAS7_Park201106_XENLA_00172175	1	0	0	0	1	0	0	0
GLP2R_Taira201203_XENLA_tissue_00172780	0	0	0	0	0	0	0	0
GLP2R_XeXenL6RMv10046997m	0	0	0	0	0	0	0	0
GNA13_Quigley201207_XENLA_00118759	0	1	0	0	0	1	1	0
HELZ_Ismailoglu201203_XENLA_00021276	0	1	0	0	0	1	1	0
HELZ_Taira201203_XENLA_stage_00070223	0	1	0	0	0	1	1	0
HS3ST3A1_Taira201203_XENLA_stage_00186798	1	1	0	0	1	1	1	0
MYH10_Taira201203_XENLA_tissue_00054432	0	1	0	0	0	1	1	0
MYH10_TC436691	0	1	0	0	0	1	1	0
MYH13_XeXenL6RMv10046990m	0	0	0	0	0	0	0	1
MYH3_Taira201203_XENLA_tissue_00094157	0	0	0	0	0	0	0	0
MYH3_XeXenL6RMv10046989m	0	1	0	0	0	1	1	0
NA_Taira201203_XENLA_stage_00110145	0	0	0	0	0	1	0	0
NA_Taira201203_XENLA_stage_00129729	0	0	0	0	0	0	0	0
NA_Taira201203_XENLA_tissue_00272806	0	0	0	0	0	0	0	0
NA_TC420853	0	0	0	0	0	0	0	0
NA_TC453083	0	0	0	0	0	0	0	0
NA_XeXenL6RMv10046995m	0	0	0	0	0	0	0	0
NA_XeXenL6RMv10047028m	0	0	0	0	0	1	0	0
NA_XeXenL6RMv10047030m	0	0	0	0	0	0	0	0
NDEL1_Park201106_XENLA_00007455	0	1	0	0	0	1	1	0
NDEL1_Taira201203_XENLA_tissue_00151092	0	1	0	0	0	1	1	0
NM_001086855.1	0	1	1	0	0	1	1	0
NM_001086964.1	0	1	0	0	0	1	1	0
NM_001091603.1	0	1	0	0	0	1	1	0
NM_001093597.1	0	0	0	0	0	1	0	0
NM_001094244.1	0	1	0	0	0	1	1	0
NM_001095379.1	0	1	0	0	0	1	1	0
NM_001095500.1	0	1	0	0	0	1	1	0
NOL11_Kwon201107_XENLA_00091217	0	1	1	0	0	1	1	0
PECAM1_Taira201203_XENLA_tissue_00157865	0	1	0	0	0	1	1	1
PIK3R5_TC414333	0	0	0	0	0	0	0	0
PIK3R6_Taira201203_XENLA_tissue_00026858	0	0	0	0	0	1	0	0
PIK3R6_XeXenL6RMv10047003m	0	0	0	0	0	1	0	0
PMP22_TC415619	1	1	0	0	1	1	1	0
POLG2_XeXenL6RMv10046949m	0	1	0	0	0	1	0	0
PRKAR1A_TC416252	0	1	1	0	0	1	1	0
PRKAR1A_XeXenL6RMv10046984m	0	1	1	0	0	1	1	0
PRKCA_Park201106_XENLA_00132964	1	1	0	0	1	1	1	1
PSMD12_TeperekTkacz201202_XENLA_00151027	1	1	1	0	1	1	1	0
RCVRN.1_Taira201203_XENLA_stage_00024140	0	0	0	0	0	0	0	0
RNF222_Quigley201207_XENLA_00007533	0	0	0	0	0	1	0	0
SLC16A6_Taira201203_XENLA_tissue_00216039	1	1	0	0	1	1	1	0
SMURF2_TC414770	0	1	0	0	1	1	1	0
STX8_Taira201203_XENLA_tissue_00265256	1	1	0	0	1	1	1	0
TEKT3_XeXenL6RMv10047021m	0	1	0	0	0	1	1	0
TEX2_Taira201203_XENLA_tissue_00088084	0	1	0	0	0	1	1	0
TEX2_XeXenL6RMv10046946m	0	0	0	0	0	0	0	0
USP43_XeXenL6RMv10047014m	0	1	0	0	0	1	0	0
WIPI1_XeXenL6RMv10046981m	0	0	0	0	0	1	0	0
XB-GENE-5934805_Taira201203_XENLA_tissue_00007975	1	0	0	0	1	0	0	0
XB-GENE-5934805_XeXenL6RMv10047002m	1	0	0	0	1	0	0	0
ZNF207_Taira201203_XENLA_tissue_00198804	0	1	1	0	0	1	1	0
ANO2_Taira201203_XENLA_tissue_00248513	0	0	0	0	0	0	0	0
BC071132.1	0	1	0	0	0	1	1	1
BC086298.1	0	1	0	0	0	1	1	0
BC133794.1	0	0	0	0	0	0	0	0
BPGM_TC421182	0	1	0	0	0	1	1	0
CALD1_Taira201203_XENLA_tissue_00121421	0	0	0	0	0	0	0	0
CCDC69_XeXenL6RMv10047196m	1	0	0	0	1	0	0	0
CD9_TC426129	0	1	0	0	0	1	1	1
FAT2_Chung201110_XENLA_00030896	0	0	0	0	0	0	0	0
FAT2_Horb201201_XENLA_00198304	0	0	0	0	0	0	0	0
FAT2_Park201106_XENLA_00027818	0	0	0	0	0	0	0	0
FAT2_Quigley201207_XENLA_00067523	0	0	0	0	0	0	0	0
IKBIP_Ismailoglu201203_XENLA_00062907	0	1	0	0	0	1	1	1
NA_Park201106_XENLA_00056044	0	0	0	0	0	0	0	0
NA_Quigley201112_XENLA_00130814	0	0	0	0	0	0	0	0
NA_Taira201203_XENLA_stage_00008620	0	0	0	0	0	0	0	0
NA_XeXenL6RMv10047192m	0	0	0	0	0	0	0	0
NM_001092397.1	0	0	0	0	0	1	0	0
NM_001092740.1	0	0	0	0	0	0	0	0
NM_001092815.1	0	0	0	1	1	0	1	1
NM_001093700.1	1	0	0	0	1	0	0	0
NM_001095227.1	0	1	0	0	0	1	1	1
POLR3B_XeXenL6RMv10047190m	0	1	0	1	0	1	1	1
SLC36A1_Quigley201207_XENLA_00048219	0	1	0	0	0	1	1	0
SLC36A1_XeXenL6RMv10047194m	0	1	0	0	0	1	1	0
XB-GENE-5911701_XeXenL6RMv10047193m	0	0	0	0	0	0	0	0
TSHZ2_XeXenL6RMv10047237m	0	0	0	0	0	0	0	0
ZNF217_Ismailoglu201203_XENLA_00052660	0	1	0	0	0	1	1	0
ZNF217_Taira201203_XENLA_stage_00215499	0	1	0	0	0	1	1	0
NA_Amin201106_XENLA_00059748	0	1	0	0	0	1	1	0
SMPD1_XeXenL6RMv10047531m	0	1	0	0	0	1	1	0
BC077640.1	0	1	0	0	0	1	1	0
C14ORF166_Kwon201107_XENLA_00096524	1	1	1	0	0	1	1	0
FRMD6_Ismailoglu201203_XENLA_00055284	0	1	0	0	1	1	1	0
FRMD6_XeXenL6RMv10049174m	0	0	0	0	0	1	0	0
GPR137C_Kwon201107_XENLA_00027236	0	1	0	0	0	1	1	0
NID2_Ismailoglu201203_XENLA_00062999	0	0	0	0	0	0	0	0
NID2_Kwon201107_XENLA_00051859	0	1	0	0	0	1	0	0
NID2_mgEST_Xl4jul2012_1013094413	0	1	0	0	0	1	0	0
NM_001090977.1	0	1	0	0	0	1	1	0
TMX1_Kwon201107_XENLA_00077699	0	1	1	0	0	1	1	0
TMX1_TeperekTkacz201206_XENLA_00044321	0	1	1	0	0	1	1	0
TRIM9_XeXenL6RMv10049169m	0	1	0	0	0	1	1	0
TXNDC16_Kwon201107_XENLA_00062009	0	1	0	0	0	1	1	0
TXNDC16_Taira201203_XENLA_stage_00032678	0	1	0	0	0	1	1	0
NM_001090781.1	1	1	0	0	1	1	1	0
NM_001093052.1	0	1	0	0	0	1	1	0
ROBO2_Taira201203_XENLA_tissue_00117549	0	0	0	0	0	0	0	1
NA_Taira201203_XENLA_tissue_00132526	0	0	0	0	0	0	0	0
NA_Taira201203_XENLA_tissue_00278500	0	0	0	0	0	0	0	0
NA_Taira201203_XENLA_tissue_00286559	0	0	0	0	0	0	0	0
BC077377.1	0	1	0	0	0	1	1	1
CRTC3_Ismailoglu201203_XENLA_00008431	0	1	0	0	1	1	1	0
IL16_Taira201203_XENLA_tissue_00056691	0	0	0	0	0	0	0	0
IL16_XeXenL6RMv10050148m	1	0	0	0	1	0	0	0
TMC3_Taira201203_XENLA_tissue_00245676	0	0	0	0	0	0	0	0
TMC3_XeXenL6RMv10050150m	0	0	0	0	0	0	0	0
ADRB1_Park201106_XENLA_00067312	1	1	0	0	1	1	1	0
BC155356.1	0	0	0	0	0	0	0	0
MAK16_Ismailoglu201203_XENLA_00056248	0	1	0	0	0	1	1	0
NA_Park201106_XENLA_00162396	0	0	0	0	0	0	0	0
NA_Taira201203_XENLA_stage_00080491	0	0	0	0	0	0	0	0
NA_Taira201203_XENLA_stage_00214541	0	0	0	0	0	0	0	0
NA_XeXenL6RMv10051072m	0	0	0	0	0	0	0	0
NA_XeXenL6RMv10051078m	0	0	0	0	0	0	0	0
NM_001086569.1	0	1	0	0	0	1	0	0
TTI2_Taira201203_XENLA_stage_00161001	0	1	0	0	0	1	1	0
TTI2_XeXenL6RMv10051079m	0	1	0	0	0	1	1	0
BC072136.1	0	1	0	0	0	1	1	0
NM_001087911.1	1	1	0	0	1	1	1	0
NM_001090862.1	0	1	0	0	0	1	1	0
NM_001094516.1	0	1	0	0	0	1	1	0
NRP1_Taira201203_XENLA_stage_00041927	0	0	0	0	0	0	0	0
ASPHD2_Ismailoglu201203_XENLA_00027967	0	0	0	0	0	0	0	0
ASPHD2_Taira201203_XENLA_tissue_00226856	0	1	0	0	0	1	1	0
BC133259.1	0	0	0	0	0	0	0	0
NA_Ismailoglu201203_XENLA_00045045	0	0	0	0	0	0	0	0
NA_Taira201203_XENLA_stage_00120656	0	0	0	0	0	0	0	0
NA_Taira201203_XENLA_tissue_00132495	0	0	0	0	0	0	0	0
NA_Taira201203_XENLA_tissue_00222020	0	0	0	0	0	0	0	0
NA_Veenstra201204_XENLA_00020008	0	0	0	0	0	0	0	0
SEZ6L_Taira201203_XENLA_stage_00008029	1	0	0	1	1	1	0	0
SEZ6L_Taira201203_XENLA_tissue_00263181	1	0	0	0	1	1	0	0
TPST2_Kwon201107_XENLA_00044099	0	1	0	0	0	1	1	0
TPST2_Taira201203_XENLA_stage_00204987	0	1	0	0	0	1	1	0
ANKLE2_TeperekTkacz201206_XENLA_00081957	0	1	0	0	0	1	1	0
ARVCF_Ismailoglu201203_XENLA_00010150	1	1	0	0	1	1	1	0
ARVCF_Kwon201107_XENLA_00024713	1	1	0	0	1	1	1	0
BC049292.1	0	0	0	0	1	1	0	1
BC071062.1	0	1	0	0	0	1	1	0
BC072124.1	1	1	0	0	1	1	1	0
C22ORF25_Ismailoglu201203_XENLA_00071518	0	1	0	0	0	1	1	0
C22ORF25_Taira201203_XENLA_tissue_00197249	0	1	0	0	0	1	1	0
CDC45_TeperekTkacz201206_XENLA_00038287	0	1	0	0	0	1	1	0
CHFR_Taira201203_XENLA_tissue_00285838	0	1	1	0	0	1	1	0
CLDN5_Taira201203_XENLA_stage_00109753	1	1	0	0	1	1	1	0
CLDN5_TC417187	1	1	0	0	1	1	1	0
COMT_Quigley201112_XENLA_00055921	0	0	0	0	1	1	0	1
FBRSL1_Taira201203_XENLA_tissue_00230828	1	1	0	0	1	1	1	1
FBRSL1_Taira201203_XENLA_tissue_00291869	0	0	0	0	0	0	0	0
GNB1L_XeXenL6RMv10052101m	1	1	0	0	1	1	1	0
GOLGA3_Kwon201107_XENLA_00027845	0	1	0	0	0	1	1	1
GOLGA3_XeXenL6RMv10052079m	0	1	0	0	0	1	1	1
NA_Horb201201_XENLA_00165787	0	0	0	0	0	0	0	0
NA_Taira201203_XENLA_tissue_00264182	1	1	0	0	1	1	1	0
NA_TeperekTkacz201206_XENLA_00016415	0	0	0	0	0	0	0	0
NM_001088108.1	0	1	0	0	0	1	1	0
NM_001088560.1	1	1	0	0	1	1	1	0
NM_001090225.1	0	0	0	0	0	1	0	0
PGAM5_Kwon201107_XENLA_00117348	0	1	0	0	0	1	1	0
SEP2A_XENTR_XeXenL6RMv10052105m	0	0	0	0	0	1	0	0
SEPT5_Taira201203_XENLA_tissue_00161213	0	1	0	0	0	1	1	0
TBX1_TC416295	1	1	0	0	1	1	1	0
TXNRD2_Ismailoglu201203_XENLA_00046094	0	0	0	0	0	1	0	0
UFD1L_XeXenL6RMv10052108m	0	1	0	0	0	1	1	0
ZDHHC8_Ismailoglu201203_XENLA_00058992	1	1	0	0	1	1	1	1
BC092128.1	0	0	0	0	0	0	0	0
BC141746.1	0	1	1	0	0	1	1	0
NM_001095869.1	0	1	0	0	0	1	1	0
NP_001120117.1_Ismailoglu201203_XENLA_00035768	1	1	0	0	1	1	1	0
PEX5_XeXenL6RMv10052358m	0	1	0	0	1	1	1	0
X70679.1	0	1	1	0	0	1	1	0
BC043774.1	0	1	0	0	0	1	1	0
FBXO40_XeXenL6RMv10053520m	0	0	0	0	0	1	1	1
GRAMD1C_Taira201203_XENLA_tissue_00259147	0	0	0	1	0	0	0	1
GRAMD1C_XeXenL6RMv10053527m	0	1	0	1	0	1	0	1
GTF2E1_Ismailoglu201203_XENLA_00061123	0	0	0	0	0	0	0	0
HGD_Taira201203_XENLA_tissue_00145612	0	1	0	0	0	1	1	0
KIAA2018_Kwon201107_XENLA_00006299	0	1	1	0	0	1	1	0
KIAA2018_Taira201203_XENLA_stage_00175295	0	1	1	0	0	1	1	0
NAA50_mgEST_Xl4jul2012_1013087061	0	1	0	0	0	1	1	0
NAT13_Taira201203_XENLA_stage_00194933	0	0	0	0	0	1	0	0
POLQ_Taira201203_XENLA_stage_00135736	0	1	0	0	0	1	1	0
SIDT1_Park201106_XENLA_00146446	1	0	0	1	1	1	0	1
SIDT1_Quigley201112_XENLA_00073750	0	0	0	0	0	1	0	0
STXBP5L_Taira201203_XENLA_tissue_00268736	0	1	0	1	0	1	1	1
BC155948.1	0	0	0	0	0	1	0	0
DRD1C_XeXenL6RMv10053588m	0	1	1	0	0	1	1	0
NOC3L_Ismailoglu201203_XENLA_00058387	0	1	0	0	0	1	1	0
NP_001106408.1_XeXenL6RMv10053580m	0	0	0	0	1	0	0	0
PLCE1_XeXenL6RMv10053593m	0	1	0	0	1	1	1	0
PPP1R3C.1_Taira201203_XENLA_tissue_00266410	0	1	0	0	0	1	1	0
TBC1D12_Taira201203_XENLA_stage_00144983	0	1	0	0	0	1	1	0
TBC1D12_Taira201203_XENLA_stage_00164676	0	0	0	0	0	0	0	0
TNKS2_Park201106_XENLA_00033822	0	1	0	0	0	1	1	0
TNKS2_Quigley201112_XENLA_00079557	0	0	0	0	0	0	0	0
TNKS2_XeXenL6RMv10053584m	0	1	0	0	0	1	1	0
BC030336_TC439984	0	1	1	0	0	1	1	0
CDR2_Quigley201207_XENLA_00001869	0	1	0	0	0	1	1	0
CRYM_Park201106_XENLA_00129866	0	1	1	0	0	1	1	0
CYTH3_XeXenL6RMv10053966m	0	1	0	0	0	1	0	0
DCUN1D3_Taira201203_XENLA_stage_00077304	0	1	0	0	0	1	1	0
DNAH3_Quigley201112_XENLA_00091928	0	1	0	0	0	1	1	0
DNAH3_Taira201203_XENLA_tissue_00048985	0	1	0	0	0	1	1	0
DNAH3_XeXenL6RMv10053948m	0	0	0	0	0	0	0	0
EEF2K_Amin201106_XENLA_00022947	0	1	0	0	1	1	1	0
EEF2K_mgEST_Xl4jul2012_1013111095	0	0	0	0	0	0	0	0
EEF2K_Quigley201207_XENLA_00031078	0	0	0	0	0	0	0	0
EEF2K_Quigley201207_XENLA_00106307	0	0	0	0	0	1	0	0
F6YJ51_XENTR_XeXenL6RMv10053958m	0	0	0	0	0	0	0	0
GP2_Taira201203_XENLA_tissue_00018534	0	1	0	0	0	1	0	0
GP2_TeperekTkacz201206_XENLA_00021364	0	0	0	0	0	1	0	0
LOC81691_Park201106_XENLA_00059167	0	1	0	0	0	1	1	0
LOC81691_Quigley201207_XENLA_00060360	0	1	0	0	0	1	1	0
LYRM1_Taira201203_XENLA_tissue_00036607	0	1	0	0	0	1	1	0
METTL9_Ismailoglu201203_XENLA_00019845	0	1	0	0	0	1	1	0
NA_Taira201203_XENLA_stage_00145696	0	1	0	0	0	1	1	0
NA_Taira201203_XENLA_tissue_00038383	0	0	0	0	0	0	0	1
NM_001086932.1	0	1	1	0	0	1	1	1
PDILT_XeXenL6RMv10053942m	1	1	0	0	1	1	1	0
TMEM159_Kwon201107_XENLA_00135026	0	1	0	0	0	1	1	0
TMEM159_Taira201203_XENLA_tissue_00270143	0	1	0	0	0	1	1	0
UMOD_Taira201203_XENLA_tissue_00246104	0	0	0	0	0	1	0	0
UMOD_XeXenL6RMv10053938m	0	0	0	0	0	1	0	0
CCNB3_TeperekTkacz201206_XENLA_00066838	0	1	0	0	0	1	1	0
CCNB3_XeXenL6RMv10054269m	0	1	0	0	0	1	1	0
CRADD.1_Ismailoglu201203_XENLA_00012903	0	1	0	0	1	1	1	0
CRADD.1_Taira201203_XENLA_tissue_00012584	0	1	0	0	0	1	1	0
NA_Ismailoglu201203_XENLA_00039994	0	0	0	0	0	0	0	0
NM_001085892.1	0	1	0	0	0	1	1	0
ATRX_Ismailoglu201203_XENLA_00011322	0	1	0	0	0	1	1	0
ATRX_XeXenL6RMv10054493m	0	1	0	0	0	1	1	0
COX7B_XeXenL6RMv10054496m	0	1	0	0	0	1	1	0
DLG3_Taira201203_XENLA_stage_00158832	0	1	1	0	0	1	1	0
DLG3_TC461350	0	0	0	0	0	0	0	0
FGF16_Taira201203_XENLA_tissue_00055335	1	1	0	0	1	1	1	0
MAGT1_Taira201203_XENLA_stage_00214725	0	1	0	0	0	1	1	0
NA_mgEST_Xl4jul2012_1013091847	0	1	0	0	0	1	1	0
NA_mgEST_Xl4jul2012_1013105340	0	1	0	0	0	1	1	0
NA_Taira201203_XENLA_tissue_00142682	0	0	0	0	0	0	0	0
NA_Taira201203_XENLA_tissue_00249379	0	0	0	0	0	1	0	0
NA_XeXenL6RMv10054481m	0	0	0	0	0	1	0	0
NA_XeXenL6RMv10054485m	0	0	0	0	0	0	0	0
NA_XeXenL6RMv10054486m	0	1	0	0	0	1	1	0
NM_001094587.1	0	1	0	0	0	1	1	0
NP_001123737.1_Taira201203_XENLA_stage_00140253	0	1	0	0	1	1	1	1
NP_001123737.1_XeXenL6RMv10054497m	0	0	0	0	0	0	0	1
SLC7A3_Ismailoglu201203_XENLA_00036830	0	1	0	0	1	1	1	1
SLC7A3_Taira201203_XENLA_stage_00192856	0	1	0	0	1	1	1	0
SNX12_Quigley201207_XENLA_00120637	0	1	0	0	0	1	1	0
TEX11_Taira201203_XENLA_tissue_00233921	0	1	0	0	0	1	0	0
AHCYL1_Taira201203_XENLA_tissue_00107620	0	1	0	0	0	1	1	0
BC041290.1	0	1	0	0	0	1	1	0
BC041752.1	0	1	0	0	0	1	1	0
BC093570.1	1	1	1	0	1	1	1	0
BC161720.1	0	1	0	0	0	1	1	0
DHRS11_Taira201203_XENLA_tissue_00208661	1	1	0	0	1	1	1	0
DSTYK_Park201106_XENLA_00003064	0	1	0	0	0	1	1	0
GGNBP2_Taira201203_XENLA_stage_00018677	0	1	0	0	0	1	1	0
GGNBP2_Taira201203_XENLA_tissue_00219863	0	1	0	0	0	1	1	0
MYO19_Ismailoglu201203_XENLA_00028386	1	1	1	0	1	1	1	0
NM_001091293.1	0	1	0	0	0	1	1	0
SLC6A17_Taira201203_XENLA_tissue_00286849	1	1	0	0	1	1	1	0
ZFAND3_mgEST_Xl4jul2012_1013156314	0	1	0	0	1	1	1	0
DDI2_Quigley201207_XENLA_00024016	0	1	1	0	0	1	1	0
NA_Amin201106_XENLA_00065629	0	0	0	0	0	0	0	0
NA_Horb201201_XENLA_00033566	0	0	0	0	0	0	0	0
NM_001086030.1	0	1	1	0	0	1	1	0
PADI2_Ismailoglu201203_XENLA_00034339	0	1	0	0	0	1	1	0
PADI2_XeXenL6RMv10055271m	0	1	0	0	0	1	1	0
SDHB_XeXenL6RMv10055270m	1	1	0	1	0	1	1	0
ARHGEF10L_Amin201106_XENLA_00047664	0	0	0	0	1	0	0	0
ANKFY1_TC439449	0	0	0	0	0	0	0	1
ANKFY1_XeXenL6RMv10055669m	0	1	0	0	0	1	1	1
BC097904.1	0	1	0	0	1	1	1	1
CEP97_Ismailoglu201203_XENLA_00072700	0	1	0	0	0	1	1	0
CYB5D2_Taira201203_XENLA_stage_00166104	0	1	0	0	0	1	1	0
DHX33_Audic201207_XENLA_00001595	1	1	0	0	1	1	1	1
F6XR86_XENTR_Amin201106_XENLA_00029974	0	1	0	0	0	1	1	1
F6XR86_XENTR_XeXenL6RMv10055673m	0	1	0	0	0	1	1	1
FAM55C_Taira201203_XENLA_tissue_00286244	0	1	0	0	0	1	1	0
NA_Ismailoglu201203_XENLA_00057537	0	0	0	0	0	0	0	0
NM_001092335.1	0	1	0	0	0	1	1	0
NP_001072333.1_Kwon201107_XENLA_00048776	1	1	0	0	1	1	1	0
NP_001072333.1_Kwon201107_XENLA_00098475	1	1	0	0	1	1	1	0
RPL24_XeXenL6RMv10055680m	0	1	0	0	0	1	1	0
UBE2G1_Quigley201207_XENLA_00101480	0	1	0	0	0	1	1	0
WBSCR16_Ismailoglu201203_XENLA_00010417	0	1	0	0	0	1	1	0
WBSCR16_Taira201203_XENLA_tissue_00083037	0	1	0	0	0	1	1	0
XB-GENE-5965587_XeXenL6RMv10055683m	0	1	0	0	0	1	0	0
ZZEF1_TeperekTkacz201206_XENLA_00118553	0	1	0	0	0	1	1	0
ARSA.1_Taira201203_XENLA_tissue_00036005	0	1	0	0	0	1	1	0
BC044708.1	0	1	0	0	0	1	1	0
BC073326.1	0	1	0	0	0	1	1	0
FAM26E_Taira201203_XENLA_tissue_00142771	0	0	0	0	0	0	0	0
RWDD1_Taira201203_XENLA_stage_00107266	0	1	0	0	0	1	1	0
RWDD1_XeXenL6RMv10055750m	0	1	0	0	0	1	1	0
ZUFSP_Kwon201107_XENLA_00103024	0	1	0	0	0	1	1	0
TSHZ2_Taira201203_XENLA_tissue_00273938	1	1	0	0	1	1	0	0
TSHZ2_XeXenL6RMv10000141m	0	0	0	0	0	0	0	0
ZNF217_Taira201203_XENLA_stage_00066772	0	1	0	0	1	1	1	0
BASP1_Taira201203_XENLA_tissue_00155122	1	1	0	0	1	1	1	0
MYO10_Taira201203_XENLA_tissue_00173387	0	1	0	0	0	1	1	1
NA_Taira201203_XENLA_stage_00162649	0	0	0	0	0	0	0	0
NA_XeXenL6RMv10000275m	0	0	0	0	0	1	0	0
NM_001086032.1	0	1	0	0	0	1	1	0
BC071133.1	0	1	0	0	0	1	1	0
CACNA1A_XeXenL6RMv10000873m	0	1	0	0	0	1	1	1
IER2_Kwon201107_XENLA_00013969	0	1	0	0	0	1	1	0
NACC1_Ismailoglu201203_XENLA_00005213	0	1	1	0	0	1	1	1
NACC1_XeXenL6RMv10000870m	0	1	1	0	0	1	1	1
NM_001091460.1	0	1	1	0	0	1	1	0
STX10_TC421152	0	1	0	0	0	1	1	0
TRMT1_Park201106_XENLA_00090793	0	1	1	0	0	1	1	0
WDR83OS_TC457502	0	1	0	0	0	1	1	0
ALMS1_Kwon201107_XENLA_00074666	0	0	0	0	0	0	0	0
ALMS1_Taira201203_XENLA_stage_00008116	0	0	0	0	0	0	0	0
CCT7_TeperekTkacz201206_XENLA_00108176	0	1	0	0	0	1	1	1
EGR4_Taira201203_XENLA_tissue_00063403	1	1	0	0	1	1	0	0
EGR4_Taira201203_XENLA_tissue_00069395	1	1	0	0	1	1	0	0
FBXO41_Taira201203_XENLA_tissue_00157372	0	0	0	0	0	0	0	0
FBXO41_XeXenL6RMv10000920m	0	0	0	0	0	0	0	0
GLOD5_Ismailoglu201203_XENLA_00024350	0	1	0	0	0	1	0	0
NM_001087722.1	1	0	0	0	1	0	0	0
NM_001091439.1	1	1	0	0	1	1	1	0
NM_001094950.1	0	1	0	0	0	1	1	1
NM_001114784.1	1	0	0	1	0	1	0	1
NOT_Taira201203_XENLA_stage_00067522	1	0	0	0	1	0	0	0
PRADC1_Ismailoglu201203_XENLA_00064068	0	1	0	0	0	1	1	0
RAB11FIP5_Kwon201107_XENLA_00118291	1	1	0	0	1	1	1	0
SMYD5_Taira201203_XENLA_stage_00003659	0	1	0	0	0	1	1	0
SMYD5_Taira201203_XENLA_tissue_00063173	0	1	0	0	0	1	1	0
BC076766.1	1	1	0	0	1	1	1	0
BC108481.1	0	1	1	0	0	1	1	0
CMTM8_Quigley201207_XENLA_00049952	0	1	0	0	0	1	1	0
GPD1L_Taira201203_XENLA_tissue_00051984	0	1	1	0	0	1	1	0
GPD1L_XeXenL6RMv10001110m	0	1	1	0	0	1	1	0
NM_001086801.1	0	1	1	0	0	1	1	0
OSBPL10_XeXenL6RMv10001111m	0	1	0	0	1	1	1	0
STT3B_Quigley201112_XENLA_00081140	0	1	0	0	0	1	1	0
BC169721.1	0	1	1	0	0	1	1	0
BICC1_TC414994	1	1	1	0	1	1	1	0
CU694254.1_Ismailoglu201203_XENLA_00053006	0	0	0	0	0	0	0	0
DKK1_TeperekTkacz201206_XENLA_00075350	1	0	0	0	1	1	0	0
DNTTIP2_Quigley201207_XENLA_00034881	0	1	1	0	0	1	1	0
DNTTIP2_XeXenL6RMv10001560m	0	1	1	0	0	1	1	0
FAM13C_Kwon201107_XENLA_00024040	1	1	0	0	1	1	1	0
IPMK_Ismailoglu201203_XENLA_00034205	0	1	0	0	0	1	1	0
NM_001087637.1	0	1	1	0	0	1	1	0
NM_001093036.1	0	1	0	0	0	1	1	0
PCDH15_Taira201203_XENLA_tissue_00049103	0	0	0	0	0	1	0	1
PCDH15_Taira201203_XENLA_tissue_00182665	1	0	0	0	1	1	0	1
Q0ZM05_CHICK_Taira201203_XENLA_tissue_00218736	0	0	0	0	0	0	0	1
Q0ZM05_CHICK_XeXenL6RMv10001574m	0	0	0	0	0	0	0	1
COL18A1_Taira201203_XENLA_stage_00107324	1	1	0	0	1	1	1	0
FRZB_Ismailoglu201203_XENLA_00033617	0	0	0	0	1	0	0	0
FRZB_XeXenL6RMv10001921m	0	0	0	0	1	0	0	0
ITGA4_Taira201203_XENLA_stage_00077794	1	1	0	0	1	1	1	0
NCKAP1_mgEST_Xl4jul2012_1013088337	0	1	0	0	0	1	0	0
NEUROD1_Taira201203_XENLA_stage_00062890	1	1	0	0	1	1	1	0
NM_001088739.1	1	1	0	0	1	1	1	0
NM_001092127.1	1	1	0	0	1	1	1	0
NUP35_TeperekTkacz201206_XENLA_00053743	0	1	0	0	0	1	1	0
PDE1A_Taira201203_XENLA_tissue_00204913	0	0	0	0	0	0	0	0
PPP1R1C_Taira201203_XENLA_tissue_00220437	0	0	0	0	0	0	0	0
Q28EV0_XENTR_Kwon201107_XENLA_00016089	0	1	0	0	0	1	1	0
Q28EV0_XENTR_Taira201203_XENLA_stage_00130345	0	1	0	0	0	1	1	0
SSFA2_Taira201203_XENLA_stage_00047589	1	1	0	0	1	1	1	0
UBE2E3_Quigley201207_XENLA_00008713	0	1	0	0	0	1	1	0
BAMBI_Taira201203_XENLA_stage_00025201	1	1	0	0	1	1	1	0
MAP3K8_Taira201203_XENLA_tissue_00062227	0	1	0	0	0	1	1	0
MKX_Kwon201107_XENLA_00021541	1	0	0	0	1	0	0	0
MKX_Taira201203_XENLA_stage_00206433	0	0	0	0	1	0	0	0
MPP7_Quigley201112_XENLA_00100066	0	1	0	0	0	1	1	0
MTPAP_XeXenL6RMv10002281m	0	1	0	0	0	1	1	0
NA_Taira201203_XENLA_tissue_00180076	0	0	0	0	0	1	0	1
NA_XeXenL6RMv10002283m	0	0	0	0	0	0	0	1
NM_001087664.1	1	1	0	0	1	1	1	0
SVIL_Taira201203_XENLA_tissue_00135209	0	0	0	0	0	0	0	0
SVIL_XeXenL6RMv10002288m	0	0	0	0	0	0	0	0
WAC_Kwon201107_XENLA_00107928	0	1	0	0	0	1	1	0
WAC_XeXenL6RMv10002273m	0	1	0	0	0	1	1	0
APOB_Taira201203_XENLA_tissue_00001811	0	0	0	0	0	0	0	0
APOB_Taira201203_XENLA_tissue_00269281	0	0	0	0	0	0	0	0
BC094441.1	0	0	0	0	0	0	0	0
C2ORF43_Park201106_XENLA_00071007	0	1	1	0	0	1	1	0
C2ORF43_Taira201203_XENLA_tissue_00152195	0	1	1	0	0	1	1	0
GDF7_Quigley201112_XENLA_00075435	1	1	0	0	1	1	0	0
GDF7_XeXenL6RMv10002398m	1	1	0	0	1	1	0	0
LOC100129278_Taira201203_XENLA_tissue_00214869	0	1	1	0	0	1	1	0
NA_Taira201203_XENLA_tissue_00186622	0	0	0	0	0	0	0	0
NA_XeXenL6RMv10002395m	0	0	0	0	0	0	0	0
NM_001086316.1	0	0	0	0	0	0	0	0
NM_001246310.1	0	0	0	0	0	0	0	0
O93468_CHICK_Taira201203_XENLA_tissue_00110422	0	1	0	0	0	1	1	0
PUM2_XeXenL6RMv10002393m	0	0	0	0	0	0	0	0
RHOB_XeXenL6RMv10002396m	0	1	0	0	0	1	1	0
ATP9A_Taira201203_XENLA_tissue_00144608	0	0	0	0	0	0	0	0
NFATC2_Taira201203_XENLA_tissue_00049391	0	0	0	0	0	0	0	0
SALL4_Kwon201107_XENLA_00137133	1	1	0	0	1	1	0	0
ZFP64_Taira201203_XENLA_tissue_00267783	0	1	0	0	1	1	1	0
BC078468.1	0	0	0	0	1	0	0	0
BC106671.1	0	0	0	0	1	0	0	0
CSRP1_XeXenL6RMv10003715m	0	0	0	0	0	1	0	0
NM_001094329.1	0	0	0	0	1	0	0	0
PKP1_Taira201203_XENLA_tissue_00019803	1	0	0	0	1	0	0	0
CDK5RAP2_mgEST_Xl4jul2012_1013097498	1	1	0	0	1	1	1	0
NM_001088132.1	0	1	0	0	0	1	1	0
SSR4_Ismailoglu201203_XENLA_00047459	0	1	0	0	0	1	1	0
COX5B.2_Taira201203_XENLA_tissue_00083969	0	1	0	0	0	1	1	0
COX5B.2_TeperekTkacz201202_XENLA_00087620	0	1	0	0	0	1	1	0
F6WKA7_XENTR_Ismailoglu201203_XENLA_00051218	0	0	0	0	0	0	0	0
HERC4_Ismailoglu201203_XENLA_00024815	0	1	0	0	0	1	1	0
LRRTM3_Taira201203_XENLA_tissue_00234782	0	1	0	0	1	1	1	0
LRRTM3_XeXenL6RMv10004878m	0	1	0	0	1	1	1	0
MYPN_Taira201203_XENLA_stage_00079294	0	0	0	0	0	0	0	0
MYPN_XeXenL6RMv10004885m	0	0	0	0	0	0	0	1
NA_Taira201203_XENLA_tissue_00258172	0	0	0	0	1	1	0	0
NM_001085821.1	0	0	0	0	0	0	0	0
NM_001097726.1	0	1	0	0	0	1	1	0
NP_001135682.1_Kwon201107_XENLA_00032463	0	0	0	0	0	1	1	0
PKD2L1_Ismailoglu201203_XENLA_00032098	0	0	0	0	0	1	0	0
FZR1_XeXenL6RMv10005029m	0	0	0	0	0	0	0	0
ANO1_Taira201203_XENLA_stage_00175005	0	0	0	0	0	0	0	0
APIP_Kwon201107_XENLA_00046947	0	1	0	0	0	1	1	0
APIP_XeXenL6RMv10005171m	0	1	0	0	0	1	1	0
ARFGAP2_Taira201203_XENLA_tissue_00098954	0	1	0	0	0	1	1	0
C11ORF49_TeperekTkacz201202_XENLA_00090536	0	1	0	0	1	1	1	0
CAT.1_Amin201106_XENLA_00029949	0	0	0	0	0	1	0	0
LRP4_Taira201203_XENLA_stage_00005945	0	0	0	0	0	1	0	0
LRP4_XeXenL6RMv10005177m	0	0	0	0	0	1	0	0
NA_Taira201203_XENLA_stage_00015448	1	0	0	0	0	0	0	0
NM_001092905.1	0	1	0	0	1	1	0	0
NM_001094395.1	0	0	0	0	0	0	0	0
NM_001105268.1	1	1	0	0	1	1	1	0
BC146628.1	0	1	1	0	0	1	1	0
NADKD1_Taira201203_XENLA_stage_00178843	0	1	1	0	0	1	1	0
NADKD1_TeperekTkacz201202_XENLA_00096795	0	1	1	0	0	1	1	0
NIPBL_TC413429	0	1	0	0	0	1	1	0
NM_001172182.1	1	0	0	0	1	1	0	0
RANBP3L_Quigley201207_XENLA_00084841	0	1	0	0	0	1	1	0
ADPRHL2_Taira201203_XENLA_tissue_00166013	0	1	0	0	0	1	1	0
ANGPT2_Taira201203_XENLA_tissue_00109126	0	0	0	0	0	0	0	0
BC077531.1	0	1	1	0	0	1	1	0
COL8A2_Taira201203_XENLA_tissue_00259819	0	0	0	0	0	0	0	0
EIF2C1_Ismailoglu201203_XENLA_00025161	0	1	0	0	0	1	1	0
EIF2C4_XeXenL6RMv10006325m	0	1	0	0	0	1	1	0
KIAA0319L_Horb201201_XENLA_00030902	0	1	0	0	0	1	1	0
KIAA0319L_mgEST_Xl4jul2012_1013091664	0	1	0	0	0	1	1	0
KIAA0319L_XeXenL6RMv10006335m	0	0	0	0	0	0	0	0
MAP7D1_Quigley201207_XENLA_00041744	1	1	0	0	1	1	1	0
MAP7D1_Taira201203_XENLA_stage_00074041	1	1	0	0	1	1	1	0
NA_TeperekTkacz201202_XENLA_00011787	0	0	0	0	0	1	0	0
NCDN_Taira201203_XENLA_stage_00031774	0	0	0	0	0	0	0	0
NCDN_XeXenL6RMv10006333m	0	1	0	0	0	1	1	0
NM_001088572.1	0	1	0	0	0	1	1	0
NM_001091292.1	1	1	0	0	1	1	1	0
NM_001094501.1	0	1	0	0	0	1	1	0
NM_001096211.1	0	1	0	0	0	1	1	0
NM_001096555.1	1	1	0	0	1	1	1	0
NM_001096810.1	0	1	0	0	0	1	1	0
NM_001103187.1	0	1	1	0	0	1	1	0
TEKT2_XeXenL6RMv10006320m	0	1	0	0	0	1	1	0
TFAP2E_Park201106_XENLA_00175160	1	1	0	0	1	1	0	1
TFAP2E_Taira201203_XENLA_stage_00168824	1	1	0	0	1	1	0	1
THRAP3_XeXenL6RMv10006304m	0	1	0	0	0	1	0	0
TRAPPC3_TC458615	0	1	0	0	0	1	1	0
ZMYM4_Taira201203_XENLA_stage_00164638	0	1	0	0	0	1	1	0
DQ096943.1	0	0	0	0	0	0	0	0
LGI4_Taira201203_XENLA_tissue_00163202	0	1	0	0	0	1	1	0
NM_001092506.1	0	0	0	0	0	0	0	0
NM_001092924.1	0	1	0	0	0	1	0	0
AIRE_TC467775	0	0	0	0	0	0	0	0
ATG16L1_Horb201201_XENLA_00049596	0	1	0	0	0	1	1	0
ATG16L1_Ismailoglu201203_XENLA_00036547	0	0	0	0	0	0	0	0
BC086465.1	0	0	0	0	0	0	0	0
BC108836.1	0	0	0	0	0	0	0	0
BC124842.1	0	0	0	0	0	0	0	0
EFHD1_mgEST_Xl4jul2012_1013086592	0	1	0	0	0	1	1	0
EU042188.1	0	0	0	0	0	0	0	0
NM_001090199.1	1	1	0	0	1	1	0	0
NP_001121413.1_Horb201201_XENLA_00029947	0	0	0	0	0	0	0	0
NP_001121413.1_TeperekTkacz201202_XENLA_00086692	0	0	0	0	0	0	0	0
NP_001121413.1_TeperekTkacz201206_XENLA_00010884	0	0	0	0	0	0	0	0
NP_001121413.1_TeperekTkacz201206_XENLA_00049999	0	0	0	0	0	0	0	0
SAG_TC464080	0	0	0	0	0	1	0	0
BC042930.1	0	0	0	0	1	0	0	0
CCDC99_Taira201203_XENLA_stage_00129174	0	1	0	0	0	1	1	0
CCDC99_Taira201203_XENLA_tissue_00250759	0	1	0	0	0	1	1	0
FAM196B_Taira201203_XENLA_tissue_00248239	0	0	0	0	0	0	0	0
NA_Ismailoglu201203_XENLA_00025777	0	0	0	0	0	0	0	0
NA_XeXenL6RMv10007478m	0	0	0	0	0	0	0	0
NM_001091296.1	0	1	0	0	0	1	1	0
ODZ2_Ismailoglu201203_XENLA_00029237	0	0	0	0	0	0	0	1
ODZ2_Ismailoglu201203_XENLA_00031378	0	0	0	0	0	1	0	0
ODZ2_Ismailoglu201203_XENLA_00055211	0	0	0	0	0	0	0	0
PANK3_Ismailoglu201203_XENLA_00007709	0	1	0	0	0	1	1	0
RARS_Quigley201207_XENLA_00053892	0	1	0	0	0	1	1	0
RARS_Taira201203_XENLA_tissue_00092226	0	0	0	0	0	0	0	0
PSTPIP2_XeXenL6RMv10007910m	0	0	0	0	0	0	0	0
ACOT8_Taira201203_XENLA_tissue_00054054	0	1	0	0	0	1	1	0
AF072455.1	0	0	0	0	0	0	0	0
BC041530.1	0	0	0	0	1	0	0	0
CD40_Taira201203_XENLA_tissue_00230839	0	0	0	0	0	1	0	0
DHX8_XeXenL6RMv10008197m	0	0	0	0	0	0	0	0
DNTTIP1_Horb201201_XENLA_00068137	0	1	0	0	0	1	1	0
NA_Taira201203_XENLA_tissue_00133840	0	0	0	0	0	0	0	0
NCOA5_Ismailoglu201203_XENLA_00025845	0	1	0	0	0	1	1	0
NCOA5_Kwon201107_XENLA_00128207	0	1	0	0	0	1	1	0
NM_001094298.1	0	0	0	0	0	1	0	0
NM_001095460.1	0	1	0	0	0	1	1	0
NM_001095735.1	0	1	0	0	0	1	1	0
TNNC2_TC452595	0	0	0	0	1	0	0	0
UBE2C_Kwon201107_XENLA_00095415	0	1	0	0	0	1	1	0
UBE2C_TeperekTkacz201206_XENLA_00044765	0	1	0	0	0	1	1	0
XB-GENE-5936529_XeXenL6RMv10008216m	1	1	0	0	1	1	1	0
ZNF335_Taira201203_XENLA_stage_00037009	0	1	0	0	0	1	1	0
ZNF335_Taira201203_XENLA_stage_00130225	0	1	0	0	0	1	1	0
ZSWIM1_Taira201203_XENLA_stage_00193375	0	1	0	0	0	1	1	0
ZSWIM3_Park201106_XENLA_00152635	0	1	0	0	0	1	1	0
ZSWIM3_TeperekTkacz201206_XENLA_00044590	0	1	0	0	0	1	1	0
ABCA1_Ismailoglu201203_XENLA_00052619	0	0	0	0	0	0	0	0
ABCA1_XeXenL6RMv10008559m	0	0	0	0	0	1	0	0
FKTN_XeXenL6RMv10008564m	0	1	0	0	0	1	1	0
FSD1L_Taira201203_XENLA_tissue_00185437	0	1	0	0	0	1	1	0
NM_001094991.1	0	1	0	0	0	1	1	0
SLC44A1_Taira201203_XENLA_stage_00058342	0	0	0	0	0	0	0	0
SLC44A1_XeXenL6RMv10008561m	0	0	0	0	0	0	0	0
BC072106.1	0	1	0	0	0	1	1	0
BC085072.1	1	1	0	0	1	1	1	0
BTF3L4_TC448523	0	1	0	0	1	1	1	0
CC2D1B_Taira201203_XENLA_tissue_00030963	0	1	0	0	0	1	1	0
CDKN2C_Taira201203_XENLA_tissue_00150266	1	1	0	0	1	1	1	0
CPT2_TeperekTkacz201206_XENLA_00026874	0	1	0	0	0	1	1	0
EPS15_Taira201203_XENLA_stage_00144792	0	0	0	0	0	1	0	0
EPS15_XeXenL6RMv10008643m	0	0	0	0	0	1	0	0
NM_001095435.1	0	1	0	0	0	1	1	0
NM_001095751.1	0	1	0	0	0	1	1	0
NRD1_Kwon201107_XENLA_00121182	0	1	0	0	0	1	1	0
OSBPL9_Kwon201107_XENLA_00090560	1	1	0	0	1	1	1	0
PODN_Taira201203_XENLA_tissue_00038871	0	0	0	0	0	0	0	0
PODN_XeXenL6RMv10008617m	0	0	0	0	0	0	0	0
RAB3B_Taira201203_XENLA_tissue_00085090	1	1	0	0	1	1	1	0
RNF11_Ismailoglu201203_XENLA_00007240	0	1	0	0	0	1	1	0
RNF11_TeperekTkacz201206_XENLA_00075737	0	1	0	0	0	1	1	0
SELRC1_Audic201207_XENLA_00007019	0	1	0	0	0	1	1	0
SELRC1_Taira201203_XENLA_stage_00194816	0	1	0	0	0	1	1	0
SLC1A7_Taira201203_XENLA_stage_00094159	0	0	0	0	0	0	0	0
SLC1A7_XeXenL6RMv10008616m	0	1	0	0	0	1	1	0
TTC39A_Taira201203_XENLA_tissue_00252408	0	0	0	0	0	1	0	0
TXNDC12_Taira201203_XENLA_stage_00161533	0	1	0	0	1	1	1	0
TXNDC12_Taira201203_XENLA_tissue_00182846	0	1	0	0	1	1	1	0
ZCCHC11_Taira201203_XENLA_stage_00174413	0	1	0	0	0	1	1	1
ZCCHC11_XeXenL6RMv10008627m	0	1	0	0	0	1	0	1
ZFYVE9_Ismailoglu201203_XENLA_00067479	0	1	0	0	0	1	1	0
ZYG11B_TeperekTkacz201206_XENLA_00125513	0	1	0	1	0	1	1	1
ZYG11B_XeXenL6RMv10008621m	0	1	0	1	0	1	1	1
MUC19_XeXenL6RMv10008970m	0	0	0	0	0	0	0	1
TBC1D5_Taira201203_XENLA_tissue_00212559	0	1	0	0	1	1	1	0
BC090190.1	0	1	0	0	0	1	1	0
C16ORF91_Amin201106_XENLA_00094273	0	1	0	0	0	1	1	0
C16ORF91_Ismailoglu201203_XENLA_00057174	0	1	0	0	0	1	1	0
C7ORF23_Kwon201107_XENLA_00060623	0	1	1	0	0	1	1	0
CDNF_Taira201203_XENLA_tissue_00074281	0	1	0	0	0	1	1	0
CDNF_XeXenL6RMv10009446m	0	1	0	0	0	1	1	0
CYP2W1_Ismailoglu201203_XENLA_00043003	0	0	0	0	0	0	0	0
CYP2W1_XeXenL6RMv10009435m	0	0	0	0	0	0	0	0
DMTF1_Taira201203_XENLA_stage_00098176	0	1	0	0	0	1	1	0
FAM107B_Veenstra201204_XENLA_00016034	0	0	0	0	0	1	0	0
FAM20C_Taira201203_XENLA_stage_00187555	1	0	0	0	1	1	1	0
FAM20C_Taira201203_XENLA_tissue_00057101	1	0	0	0	1	1	1	0
GPER_Taira201203_XENLA_tissue_00080202	0	0	0	0	0	1	0	0
GPR146_XeXenL6RMv10009443m	0	1	0	1	1	1	1	0
H3F3B_Ismailoglu201203_XENLA_00014692	0	1	0	0	0	1	1	0
H3F3C_Ismailoglu201203_XENLA_00048291	0	1	0	0	0	1	1	0
HEATR2_XeXenL6RMv10009429m	1	1	0	0	1	1	1	0
KIAA1324L_Horb201201_XENLA_00101042	0	0	0	0	0	0	0	0
MEIG1_Taira201203_XENLA_tissue_00061272	0	1	0	0	0	1	1	0
NA_Taira201203_XENLA_tissue_00237901	0	1	0	0	0	1	1	0
NM_001091326.1	0	1	0	0	0	1	1	0
NM_001093278.1	0	1	0	0	1	1	0	0
NM_001093532.1	0	1	0	0	0	1	1	0
NM_001097038.1	1	1	0	0	1	1	1	0
NM_001097868.1	0	1	0	0	0	1	1	0
PDGFA_Park201106_XENLA_00042282	1	1	0	0	1	1	1	0
PDGFA_Taira201203_XENLA_stage_00118847	1	1	0	0	1	1	1	0
PRKAR1B_Ismailoglu201203_XENLA_00067569	1	1	0	0	1	1	1	0
SUV39H2_Taira201203_XENLA_tissue_00148271	0	1	0	0	0	1	1	0
UNKL_Taira201203_XENLA_stage_00187178	0	1	0	0	0	1	1	0
AGPS_Ismailoglu201203_XENLA_00066908	0	1	0	0	1	1	1	0
BC169881.1	0	1	0	0	0	1	1	0
CABZ01056802.1_TeperekTkacz201206_XENLA_00130340	0	0	0	0	0	0	0	0
CDCA7_XeXenL6RMv10009637m	0	1	0	0	0	1	1	0
CYCT_mgEST_Xl4jul2012_1013157123	1	1	1	0	1	1	1	0
GPR155_Taira201203_XENLA_stage_00082333	1	1	0	0	1	1	1	0
GTPBP5_XeXenL6RMv10009641m	1	1	0	0	1	1	1	0
HNRNPA3_Taira201203_XENLA_tissue_00177069	0	1	0	0	0	1	1	0
L02957.1	0	1	0	0	0	1	1	0
NFE2L2_Taira201203_XENLA_tissue_00037291	0	1	0	0	0	1	1	0
NM_001091993.1	1	1	1	0	1	1	1	0
NM_001092426.1	1	1	0	0	1	1	1	0
NM_001128624.1	0	1	0	0	0	1	1	0
OLA1_Kwon201107_XENLA_00021671	1	1	0	0	1	1	1	0
PDE11A_TC455515	0	1	0	0	0	1	0	1
PDE11A_XeXenL6RMv10009652m	0	0	0	0	0	0	0	1
RAPGEF4_XeXenL6RMv10009634m	0	0	0	0	0	0	0	0
SI_DKEY-15I8.3_XeXenL6RMv10009635m	0	0	0	0	0	1	0	0
SP3_Ismailoglu201203_XENLA_00048208	0	1	0	0	0	1	1	0
SP3_XeXenL6RMv10009639m	0	1	0	0	0	1	1	0
SP9_XeXenL6RMv10009642m	1	0	0	0	1	0	0	0
WIPF1_Ismailoglu201203_XENLA_00067742	0	0	0	0	0	1	0	0
WIPF1_Taira201203_XENLA_tissue_00121462	1	0	0	0	1	1	1	0
WIPF1_XeXenL6RMv10009647m	0	0	0	0	0	1	0	0
ZAK_XeXenL6RMv10009636m	0	0	0	0	0	0	0	0
ATPIF1_Park201106_XENLA_00054467	1	1	0	0	1	1	1	0
NM_001085802.1	1	1	0	0	1	1	1	0
SDC3_Park201106_XENLA_00093254	0	0	0	0	0	1	1	0
SYNCRIPL_XeXenL6RMv10009826m	0	1	0	0	0	1	1	0
BIVM_Taira201203_XENLA_stage_00092269	0	1	0	0	0	1	1	0
BIVM_Taira201203_XENLA_tissue_00018127	0	1	0	0	0	1	1	0
C13ORF27_Taira201203_XENLA_stage_00205317	0	0	0	0	0	1	0	0
C13ORF27_Taira201203_XENLA_tissue_00250157	0	0	0	0	0	1	0	0
C3ORF17_Taira201203_XENLA_tissue_00248477	0	1	0	0	0	1	1	0
ERCC5_Ismailoglu201203_XENLA_00026273	0	1	0	0	0	1	1	0
KDELC1_XeXenL6RMv10010014m	0	1	0	0	0	1	1	0
NA_Ismailoglu201203_XENLA_00012195	0	1	0	0	0	1	1	0
NA_Taira201203_XENLA_stage_00029347	0	0	0	0	0	0	0	0
NM_001096052.1	0	1	0	0	0	1	1	0
SLC10A2_Taira201203_XENLA_tissue_00026968	0	0	0	0	0	0	0	0
AADAT_Ismailoglu201203_XENLA_00028123	0	0	0	0	0	0	0	0
AADAT_Park201106_XENLA_00071512	0	1	0	0	0	1	1	0
BC142583.1	0	1	0	0	0	1	1	0
CLCN3_Ismailoglu201203_XENLA_00041872	0	1	0	0	0	1	1	0
MFAP3L_Taira201203_XENLA_tissue_00160902	1	1	0	0	1	1	1	0
NEK1_Taira201203_XENLA_tissue_00188705	0	1	0	0	0	1	1	0
NM_001091535.1	0	0	0	0	0	1	0	0
BC081279.1	0	0	0	0	0	1	0	0
KSR1_Kwon201107_XENLA_00056160	1	1	0	0	1	1	1	0
KSR1_Taira201203_XENLA_tissue_00174851	1	1	0	0	1	1	1	0
LGALS9C_Taira201203_XENLA_tissue_00052143	0	0	0	0	0	0	0	0
NF1_Park201106_XENLA_00008672	0	0	0	0	0	0	0	0
NF1_XeXenL6RMv10010215m	0	1	0	0	0	1	0	0
NM_001086888.1	1	1	0	0	1	1	1	0
Q9W7K9_CHICK_Taira201203_XENLA_stage_00059929	1	1	0	0	1	1	1	0
BC087379.1	0	1	0	0	0	1	1	0
BRE_Ismailoglu201203_XENLA_00020596	0	1	0	0	0	1	1	1
BRE_Taira201203_XENLA_stage_00079549	0	1	0	0	0	1	1	1
MRPL33_Taira201203_XENLA_stage_00043105	0	1	1	0	0	1	1	0
NA_TeperekTkacz201206_XENLA_00060504	0	0	0	0	1	1	0	0
NM_001093991.1	0	1	0	0	1	1	0	0
NM_001095258.1	0	1	0	0	0	1	1	0
SLC4A1AP_Kwon201107_XENLA_00066428	0	1	0	0	0	1	1	0
SUPT7L_XeXenL6RMv10010228m	0	1	0	0	0	1	1	0
BC106253.1	0	1	0	0	0	1	1	0
LBH_Taira201203_XENLA_tissue_00217282	1	1	0	0	1	1	1	0
NA_XeXenL6RMv10010283m	0	1	0	0	0	1	1	0
NM_001093172.1	0	1	0	0	0	1	1	0
AP1S3_Horb201201_XENLA_00127363	0	1	0	0	1	1	1	0
AP1S3_Quigley201207_XENLA_00098945	0	1	0	0	1	1	1	0
BC108883.1	1	1	0	0	0	1	1	0
BC155927.1	0	1	1	0	0	1	1	0
F6PM11_XENTR_XeXenL6RMv10010590m	0	0	0	0	0	0	0	0
IWS1_Kwon201107_XENLA_00110030	1	1	0	0	0	1	1	0
IWS1_Park201106_XENLA_00075664	1	1	0	1	0	1	1	0
IWS1_Taira201203_XENLA_tissue_00059593	1	1	0	1	0	1	1	0
MYO7B_XeXenL6RMv10010588m	0	0	0	0	1	0	0	0
NA_Taira201203_XENLA_stage_00092538	1	0	0	0	1	1	0	0
NM_001092239.1	0	1	0	0	0	1	1	0
NM_001093846.1	0	1	0	0	0	1	1	0
NP_001120289.1_Taira201203_XENLA_stage_00060698	0	0	0	0	0	0	0	0
NP_001120289.1_Taira201203_XENLA_tissue_00280841	0	0	0	0	0	1	0	0
POLR2D_Ismailoglu201203_XENLA_00025067	0	1	0	0	0	1	1	0
POLR2D_TeperekTkacz201202_XENLA_00002702	0	1	0	0	0	1	1	0
SAP130_Taira201203_XENLA_stage_00000477	0	1	1	0	0	1	1	0
SAP130_Taira201203_XENLA_stage_00143167	0	1	1	0	0	1	1	0
SCG2_Taira201203_XENLA_tissue_00016216	0	0	0	0	0	0	0	0
WDFY1_Kwon201107_XENLA_00085771	0	1	0	0	0	1	1	0
RNF139_Ismailoglu201203_XENLA_00044689	0	1	0	0	0	1	1	0
RNF139_Taira201203_XENLA_stage_00120473	0	1	0	0	0	1	1	0
TMEM65_TeperekTkacz201206_XENLA_00014367	0	0	0	0	0	0	0	0
TMEM65_XeXenL6RMv10010632m	0	0	0	0	0	0	0	0
AF041846.1	0	0	0	0	0	0	0	0
ANKRD55_Taira201203_XENLA_tissue_00193270	0	0	0	0	0	0	0	0
IL6ST_Quigley201207_XENLA_00044167	0	1	0	0	0	1	1	0
IL6ST_XeXenL6RMv10010693m	0	0	0	0	0	0	0	0
NA_Taira201203_XENLA_stage_00040883	0	0	0	0	0	0	0	0
NM_001127793.1	0	1	0	0	0	1	1	1
NP_001016823.1_Ismailoglu201203_XENLA_00002931	0	1	0	0	0	1	1	0
B0JYZ8_XENTR_Taira201203_XENLA_stage_00184144	0	1	0	0	1	1	1	1
BC041740.1	0	1	0	0	0	1	1	0
EEF1A1_Taira201203_XENLA_stage_00008071	0	1	0	0	0	1	1	0
FAM135A_Kwon201107_XENLA_00105535	0	1	0	0	0	1	1	0
MB21D1_Taira201203_XENLA_tissue_00018328	0	0	0	0	0	0	0	0
MB21D1_XeXenL6RMv10010744m	0	0	0	0	0	0	0	0
NM_001095604.1	1	1	0	0	1	1	1	0
NM_001127787.1	0	1	0	0	0	1	1	0
OGFRL1_Taira201203_XENLA_tissue_00255057	0	1	0	0	0	1	1	0
RIMS1_Taira201203_XENLA_tissue_00159500	0	0	0	0	0	1	0	1
RIMS1_TeperekTkacz201206_XENLA_00053146	0	0	0	0	1	0	0	0
RIMS1_XeXenL6RMv10010733m	0	0	0	0	0	0	0	0
RIMS1_XeXenL6RMv10010735m	0	0	0	0	0	1	0	0
RIMS1_XeXenL6RMv10010737m	0	0	0	0	1	0	0	0
SLC17A5_Park201106_XENLA_00153062	0	1	0	0	0	1	1	0
SMAP1_mgEST_Xl4jul2012_1013089189	0	1	0	0	0	1	1	0
SMAP1_Taira201203_XENLA_tissue_00213197	0	0	0	0	0	0	0	0
AF179300.1	1	1	0	0	1	1	1	1
BC043734.1	1	1	0	0	1	1	1	1
BC077463.1	1	1	0	0	1	1	1	1
CUEDC2_Taira201203_XENLA_stage_00035800	0	1	0	0	1	1	1	0
ELOVL3_Kwon201107_XENLA_00112097	0	1	0	0	0	1	1	1
ELOVL3_XeXenL6RMv10010818m	0	1	0	0	0	1	1	1
GBF1_Kwon201107_XENLA_00015786	0	1	0	0	1	1	1	0
GBF1_Kwon201107_XENLA_00052330	0	0	0	0	1	1	0	0
MYOZ1_Taira201203_XENLA_stage_00097246	0	0	0	0	0	1	0	0
NA_Ismailoglu201203_XENLA_00008379	0	1	0	0	1	1	1	1
NDUFB8_Amin201106_XENLA_00041655	0	1	0	1	0	1	1	1
NFKB2_Taira201203_XENLA_tissue_00021280	0	1	0	0	0	1	1	0
NM_001085743.1	1	1	0	0	1	1	1	0
NM_001091559.1	0	1	0	0	0	1	1	0
NM_001091781.1	0	0	0	1	0	1	0	0
SEC24D_Taira201203_XENLA_tissue_00053227	0	0	0	0	0	0	0	0
SEC24D_XeXenL6RMv10010821m	1	1	0	0	1	1	1	0
SEC31B_Taira201203_XENLA_stage_00178920	0	1	0	1	0	1	1	0
SYNPO2L_Taira201203_XENLA_stage_00121704	0	0	0	0	0	0	0	0
USP54_Taira201203_XENLA_tissue_00179104	0	0	0	0	0	0	0	0
USP54_XeXenL6RMv10010824m	0	0	0	0	0	0	0	0
USP54_XeXenL6RMv10010825m	0	0	0	0	0	0	0	0
Y10120.1	1	1	0	0	1	1	1	1
AF223427.1	0	1	0	0	0	1	1	0
BC142545.1	0	0	0	0	0	0	0	0
CAP2_Kwon201107_XENLA_00044151	0	0	0	0	0	1	0	1
CAP2_Taira201203_XENLA_tissue_00240272	0	1	0	0	0	1	1	1
DTNBP1_Taira201203_XENLA_stage_00050389	0	1	0	0	1	1	1	0
DTNBP1_Taira201203_XENLA_tissue_00276500	0	1	0	0	1	1	1	0
F7BHZ5_XENTR_Park201106_XENLA_00158438	0	0	0	0	0	0	0	0
F7BHZ5_XENTR_TeperekTkacz201202_XENLA_00024100	0	0	0	0	0	0	0	0
FAM8A1_XeXenL6RMv10011115m	0	1	0	0	0	1	1	0
JARID2_Taira201203_XENLA_stage_00079952	0	1	0	0	0	1	1	0
KIF13A_Park201106_XENLA_00121791	0	0	0	0	0	0	0	0
KIF13A_TeperekTkacz201206_XENLA_00035360	0	0	0	0	0	0	0	0
NHLRC1_Taira201203_XENLA_tissue_00041099	0	0	0	0	0	1	0	0
NHLRC1_XeXenL6RMv10011118m	0	0	0	0	0	1	0	0
NM_001094439.1	0	1	0	0	0	1	1	0
NM_001094693.1	0	1	0	0	1	1	1	0
NUP153_Taira201203_XENLA_stage_00209240	0	1	0	0	1	1	1	0
RBM24_Taira201203_XENLA_stage_00000585	0	1	0	0	0	1	1	0
B3GNT7_Kwon201107_XENLA_00055505	1	1	0	0	1	1	1	0
NCL_Taira201203_XENLA_stage_00155206	0	1	0	0	0	1	1	0
NCL_TeperekTkacz201206_XENLA_00012475	0	1	0	0	0	1	1	0
NM_001088088.1	0	1	0	0	0	1	1	0
NM_001094011.1	1	1	0	0	1	1	1	0
NM_001096178.1	0	1	0	0	0	1	1	0
NMUR1_Taira201203_XENLA_tissue_00267421	0	0	0	0	0	0	0	0
NMUR1_XeXenL6RMv10011171m	0	0	0	0	0	0	0	0
TMEM229B_Taira201203_XENLA_tissue_00248353	0	0	0	0	0	1	0	0
ABHD2_XeXenL6RMv10011422m	0	1	0	0	1	1	1	0
ACAN_Taira201203_XENLA_tissue_00123322	0	0	0	0	0	0	0	1
ACAN_XeXenL6RMv10011418m	0	0	0	0	0	1	0	0
AEN_Ismailoglu201203_XENLA_00028077	0	1	0	0	0	1	1	0
AGBL1_Taira201203_XENLA_tissue_00043616	1	0	0	1	1	1	0	0
AGBL1_Taira201203_XENLA_tissue_00126707	1	0	0	1	1	1	0	1
AKAP13_Horb201201_XENLA_00182715	0	0	0	0	0	1	0	0
AKAP13_XeXenL6RMv10011403m	0	0	0	0	0	1	0	0
ANPEP_TC414163	1	0	0	0	1	0	0	1
ARHGEF1_Taira201203_XENLA_tissue_00126635	0	0	0	0	0	1	0	0
AY331399.1	0	0	0	0	1	1	1	0
BC128671.1	0	0	0	0	0	0	0	0
CIB1_TC427239	0	1	0	0	0	1	1	0
DET1_Taira201203_XENLA_stage_00142655	0	1	0	0	0	1	1	0
DET1_Taira201203_XENLA_tissue_00233815	0	1	0	0	0	1	1	0
FAM108C1_Ismailoglu201203_XENLA_00042392	0	1	0	0	0	1	1	0
FANCI_Ismailoglu201203_XENLA_00014005	0	1	1	0	0	1	1	0
FES_XeXenL6RMv10011476m	0	0	0	1	1	1	0	0
GNRHR2_Taira201203_XENLA_tissue_00168929	0	0	0	0	0	0	0	0
HAPLN3_TC415680	1	1	0	0	1	1	1	0
IDH2_XeXenL6RMv10011457m	0	1	0	0	0	1	1	0
KIAA1199_Amin201106_XENLA_00048943	0	0	0	0	0	1	0	0
KLHL25_Taira201203_XENLA_stage_00213192	0	1	0	0	0	1	1	0
MAN2A2_TC414011	0	1	0	0	1	1	1	0
MESDC1_Quigley201207_XENLA_00006147	1	1	0	0	0	1	1	0
MESDC2_TeperekTkacz201206_XENLA_00101447	1	1	0	0	0	1	1	0
MESPB_TeperekTkacz201206_XENLA_00069338	0	0	0	0	0	0	0	0
MFGE8_Kwon201107_XENLA_00122424	1	1	0	0	1	1	1	0
MFGE8_TC415547	1	1	0	0	1	1	1	0
NA_Amin201106_XENLA_00005068	1	1	0	0	1	1	1	0
NA_Amin201106_XENLA_00057794	1	1	0	0	1	1	1	0
NA_Amin201106_XENLA_00080706	0	0	0	0	0	0	0	0
NA_Kwon201107_XENLA_00064264	1	1	0	0	1	1	1	0
NA_Kwon201107_XENLA_00135516	0	1	0	0	1	1	1	0
NA_Park201106_XENLA_00014931	0	1	0	0	0	1	1	0
NA_Park201106_XENLA_00137699	0	1	0	0	0	1	1	1
NA_Taira201203_XENLA_stage_00108215	0	0	0	0	0	0	0	0
NA_XeXenL6RMv10011431m	0	1	0	0	0	1	1	1
NM_001086917.1	0	0	0	0	0	1	0	0
NM_001087995.1	0	1	0	0	1	1	1	0
NM_001088172.1	0	0	0	0	0	0	0	0
NM_001089103.1	0	1	0	0	0	1	1	0
NM_001092564.1	0	1	0	0	0	1	0	0
NM_001094285.1	0	1	0	0	0	1	1	0
NM_001095263.1	0	1	0	0	0	1	1	0
NM_001095284.1	0	1	0	0	1	1	1	0
NP_001107385.1_TC422130	0	1	0	0	0	1	1	0
PEX11A_Taira201203_XENLA_tissue_00258545	0	1	0	0	0	1	1	1
POLG_Ismailoglu201203_XENLA_00025719	1	1	0	0	1	1	1	0
PRC1_Ismailoglu201203_XENLA_00057371	0	1	0	0	0	1	1	0
RHCG_Ismailoglu201203_XENLA_00032156	0	0	0	0	0	0	0	0
SEMA4B_Taira201203_XENLA_tissue_00105705	0	1	0	0	0	1	1	0
SLCO3A1_Taira201203_XENLA_tissue_00032160	0	0	0	0	0	0	0	1
SLCO3A1_XeXenL6RMv10011398m	0	1	0	0	0	1	0	1
SV2B_Taira201203_XENLA_stage_00146268	0	0	0	0	0	0	0	0
SV2B_XeXenL6RMv10011401m	0	1	0	0	0	1	0	0
TTLL13_Quigley201207_XENLA_00027749	0	1	0	0	0	1	1	0
UNC45A_Quigley201112_XENLA_00053070	0	1	0	0	0	1	1	0
VPS33B_Kwon201107_XENLA_00018787	0	1	0	0	0	1	1	0
WDR93_Taira201203_XENLA_tissue_00102555	0	1	0	1	1	1	1	1
ZNF710_TeperekTkacz201202_XENLA_00076007	0	0	0	0	0	1	0	0
ZNF710_XeXenL6RMv10011456m	0	0	0	0	0	1	0	0
ADRB2_Taira201203_XENLA_tissue_00258486	1	1	0	0	1	1	1	0
DRD1_XeXenL6RMv10011507m	0	0	0	0	0	0	0	0
DUSP1_Taira201203_XENLA_stage_00096961	1	1	0	0	1	1	1	0
ERGIC1_TeperekTkacz201206_XENLA_00052924	0	1	0	0	0	1	1	0
NA_XeXenL6RMv10011512m	0	0	0	0	0	0	0	0
NEURL1B_Ismailoglu201203_XENLA_00018114	0	1	0	0	0	1	1	0
POLE4_Park201106_XENLA_00161446	0	1	0	0	0	1	1	0
POLE4_Quigley201207_XENLA_00022450	0	1	0	0	0	1	1	0
SFXN1_Audic201207_XENLA_00002200	0	1	0	0	0	1	1	0
SH3PXD2B_Kwon201107_XENLA_00094192	1	1	0	0	1	1	1	0
SH3PXD2B_Taira201203_XENLA_tissue_00182844	1	1	0	0	1	1	1	0
UBTD2_Ismailoglu201203_XENLA_00053544	1	1	0	0	1	1	1	1
BC073649.1	0	1	0	0	0	1	1	0
DNHD1_Chung201110_XENLA_00012912	0	0	0	0	0	0	0	0
DNHD1_Quigley201112_XENLA_00003909	0	0	0	0	1	0	0	0
DNHD1_Quigley201112_XENLA_00023963	0	0	0	0	0	0	0	0
DNHD1_Quigley201112_XENLA_00060976	0	0	0	0	1	0	0	0
DNHD1_Quigley201112_XENLA_00062510	0	0	0	0	0	0	0	0
DNHD1_XeXenL6RMv10011649m	0	0	0	0	0	0	0	0
ILK_XeXenL6RMv10011647m	0	1	0	0	0	1	1	0
NM_001091086.1	0	1	0	0	0	1	0	0
RRP8_XeXenL6RMv10011648m	0	1	0	0	0	1	1	0
TPP1_XeXenL6RMv10011646m	0	1	0	0	0	1	0	0
TRPM4_Audic201207_XENLA_00001748	1	0	0	1	0	0	0	1
TRPM4_XeXenL6RMv10011645m	1	0	0	1	0	0	0	1
BC079700.1	0	1	1	0	0	1	1	0
BC130190.1	0	1	0	0	0	1	1	0
BTBD17_Taira201203_XENLA_tissue_00038344	0	0	0	0	0	0	0	0
C17ORF80_Park201106_XENLA_00032455	0	1	0	0	0	1	1	0
C17ORF80_Park201106_XENLA_00076384	0	1	0	0	0	1	1	0
CBX4_TC422384	1	1	0	0	1	1	1	0
CBX8_Taira201203_XENLA_tissue_00048004	1	1	0	1	1	1	1	1
CDC42EP4_XeXenL6RMv10011686m	0	1	0	0	0	1	1	0
CPSF4L_Taira201203_XENLA_tissue_00206925	0	0	0	1	0	0	0	1
NA_Kwon201107_XENLA_00041266	0	1	0	0	0	1	1	0
NA_Quigley201207_XENLA_00075522	0	1	1	0	0	1	1	0
NM_001085724.1	0	0	0	0	0	0	0	1
NM_001086481.1	0	1	1	0	0	1	1	0
NP_001004861.1_Taira201203_XENLA_tissue_00211186	0	1	1	0	0	1	1	0
PTRH1_Ismailoglu201203_XENLA_00065232	0	1	0	0	0	1	1	0
PTRH1_TeperekTkacz201202_XENLA_00112829	0	1	0	0	0	1	1	0
SDK2_Taira201203_XENLA_tissue_00160383	1	0	0	0	1	0	0	0
ACVR2B_XeXenL6RMv10011828m	0	0	0	0	0	0	0	0
CRYGN_Taira201203_XENLA_tissue_00232659	0	0	0	0	0	0	0	0
NA_XeXenL6RMv10011831m	0	0	0	0	0	0	0	0
RHEB_Taira201203_XENLA_stage_00147452	0	1	0	0	0	1	1	0
RHEB_Taira201203_XENLA_tissue_00159854	0	0	0	0	0	0	0	0
RHEB_Taira201203_XENLA_tissue_00235096	0	1	0	0	0	1	1	0
WDR86_XeXenL6RMv10011833m	0	0	0	0	1	0	0	0
ANP32B_TeperekTkacz201206_XENLA_00043215	0	1	0	0	1	1	1	0
BC123173.1	0	1	1	0	0	1	1	0
C9ORF156_Taira201203_XENLA_stage_00209438	0	1	0	0	0	1	1	0
C9ORF84_Ismailoglu201203_XENLA_00061798	0	1	0	0	0	1	1	0
C9ORF84_Ismailoglu201203_XENLA_00070691	0	0	0	0	0	0	0	0
CRTC1_Taira201203_XENLA_tissue_00128988	0	1	0	0	1	1	1	1
CRTC1_Taira201203_XENLA_tissue_00137039	0	1	0	0	1	1	1	1
D31895.1	0	1	1	0	0	1	1	0
FOXE1_Park201106_XENLA_00113405	0	0	0	0	0	1	0	0
GNG10_TC444126	0	0	0	0	0	1	0	0
KIAA0368_Ismailoglu201203_XENLA_00003238	0	1	0	0	1	1	1	0
NA_Ismailoglu201203_XENLA_00009150	0	1	0	0	0	1	1	0
NCBP1_TeperekTkacz201206_XENLA_00084748	0	1	0	0	0	1	1	0
NM_001090475.1	0	1	0	0	0	1	1	0
NM_001091471.1	1	0	0	0	0	0	0	0
NM_001091987.1	0	1	0	0	0	1	1	0
NM_001093315.1	0	1	0	1	0	1	1	1
NM_001094877.1	0	1	0	0	1	1	1	0
NM_001095544.1	0	0	0	0	0	1	0	0
NP_001011423.1_Taira201203_XENLA_tissue_00074019	0	0	0	0	0	0	0	0
NP_001011423.1_TeperekTkacz201206_XENLA_00082617	0	0	0	0	0	0	0	0
SMC2_TC414107	0	1	0	0	0	1	1	0
TDRD7_Ismailoglu201203_XENLA_00058390	0	1	0	0	0	1	1	0
TDRD7_Taira201203_XENLA_tissue_00154915	0	1	0	0	0	1	1	0
TSTD2_Taira201203_XENLA_tissue_00017383	0	1	0	0	0	1	1	0
XPA_Quigley201207_XENLA_00112179	0	1	1	0	0	1	1	0
ALS2CL_Taira201203_XENLA_tissue_00012048	0	0	0	0	0	0	0	0
AY289207.1	0	0	0	0	0	0	0	0
JMJD4_Taira201203_XENLA_stage_00209045	0	1	0	0	0	1	1	0
JMJD4_XeXenL6RMv10011924m	0	1	0	0	0	1	1	0
NGP_Taira201203_XENLA_tissue_00193280	0	0	0	0	0	0	0	1
NM_001089148.1	0	0	0	0	0	0	0	0
NM_001114815.1	0	1	0	0	0	1	1	0
PTH1R_Horb201201_XENLA_00027378	0	0	0	0	0	0	0	0
PTH2R_Taira201203_XENLA_stage_00055277	1	1	0	0	1	1	1	0
SNAP47_XeXenL6RMv10011922m	0	1	0	0	0	1	1	0
TMIE_Taira201203_XENLA_tissue_00081773	0	0	0	0	0	0	0	0
CASK_Ismailoglu201203_XENLA_00022117	0	0	0	0	0	1	0	0
NA_Quigley201112_XENLA_00059155	0	0	0	0	0	1	0	0
SLC12A4_Amin201106_XENLA_00080552	0	0	0	1	0	0	0	1
SLC12A4_TeperekTkacz201206_XENLA_00029170	0	0	0	1	0	0	0	1
IDH3B_Taira201203_XENLA_stage_00053439	0	1	0	1	0	1	1	1
NM_001091926.1	0	1	0	1	0	1	1	1
RDH11_Park201106_XENLA_00133543	0	0	0	1	0	0	0	0
RHOBTB2A_Audic201207_XENLA_00005766	0	1	0	0	0	1	1	0
RHOBTB2A_Taira201203_XENLA_stage_00190051	0	0	0	0	0	1	0	0
RHOBTB2A_TeperekTkacz201202_XENLA_00132658	0	1	0	0	0	1	1	0
RTKN_XeXenL6RMv10012408m	0	0	0	0	0	0	0	0
RAP1A_Chung201110_XENLA_00015638	0	1	0	0	1	1	1	1
ACTN4_TC413971	0	1	0	0	0	1	1	0
ARHGAP11A.2_Taira201203_XENLA_stage_00151104	0	0	0	0	0	0	0	0
BC073564.1	0	0	0	0	0	1	0	0
BC139495.1	0	0	0	0	0	0	0	0
CDK20_Taira201203_XENLA_tissue_00116903	0	1	1	0	0	1	1	0
CDK20_Taira201203_XENLA_tissue_00179722	0	1	1	0	0	1	1	0
CLIP3_Taira201203_XENLA_stage_00145623	0	0	0	0	0	1	0	0
DKEY-16N15.6_XeXenL6RMv10012607m	0	1	0	0	0	1	1	0
EBP_Taira201203_XENLA_stage_00209639	0	1	0	0	0	1	1	0
EBP_Taira201203_XENLA_tissue_00075585	0	1	0	0	0	1	1	0
EIF3K_TeperekTkacz201206_XENLA_00092541	0	1	0	0	0	1	1	0
F6WC80_XENTR_Taira201203_XENLA_tissue_00051472	1	0	0	0	1	0	0	0
F6WC80_XENTR_XeXenL6RMv10012595m	1	0	0	0	1	0	0	0
FBXO27_Taira201203_XENLA_tissue_00263194	0	1	0	0	0	1	1	0
GATA1_Taira201203_XENLA_tissue_00015293	0	1	0	0	0	1	1	0
HNRNPL_Ismailoglu201203_XENLA_00059716	0	1	0	0	0	1	1	0
HNRNPL_TC441268	0	1	0	0	0	1	1	0
HNRNPL_XeXenL6RMv10012562m	0	1	0	0	0	1	1	0
LGALS4_Ismailoglu201203_XENLA_00067737	0	0	0	0	0	0	0	0
M27235.1	0	0	0	0	0	0	0	0
MRPS12_TC455312	0	1	0	0	0	1	1	0
NA_Ismailoglu201203_XENLA_00063576	0	0	0	0	0	0	0	0
NA_Taira201203_XENLA_stage_00137287	0	0	0	0	0	0	0	0
NA_Taira201203_XENLA_tissue_00056258	0	0	0	0	0	0	0	1
NA_Taira201203_XENLA_tissue_00171491	0	0	0	0	0	0	0	0
NA_TeperekTkacz201206_XENLA_00060456	0	0	0	0	0	0	0	0
NDUFB11_Park201106_XENLA_00169438	1	1	1	0	1	1	1	0
NM_001086063.1	0	0	0	0	0	1	0	0
NM_001086081.1	0	1	1	0	0	1	1	0
NM_001087347.1	0	1	0	0	0	1	1	0
NM_001091040.1	0	1	1	0	0	1	1	0
NM_001091418.1	0	0	0	0	0	0	0	0
NM_001094451.1	0	0	0	0	0	0	0	0
NM_001095859.1	0	1	1	0	0	1	1	0
NM_001096654.1	0	1	1	0	0	1	1	0
NM_001097654.1	0	0	0	0	0	0	0	0
PAK4_TeperekTkacz201206_XENLA_00010101	0	0	0	0	0	1	0	0
PAK4_XeXenL6RMv10012571m	0	1	0	0	0	1	1	0
PLEKHG2_Taira201203_XENLA_tissue_00082102	0	0	0	0	0	0	0	0
PQBP1_Taira201203_XENLA_tissue_00206984	0	1	0	0	0	1	1	0
PQBP1_TeperekTkacz201206_XENLA_00016711	0	1	1	0	0	1	1	0
RYR1A_XeXenL6RMv10012557m	0	0	0	0	0	0	0	0
SAMD4B_Park201106_XENLA_00058163	0	1	1	0	0	1	1	0
SLC38A5_Ismailoglu201203_XENLA_00039459	1	1	0	0	0	1	0	0
SLC8A2_Taira201203_XENLA_stage_00068341	0	0	0	0	0	0	0	0
SLC8A2_Taira201203_XENLA_tissue_00246361	0	0	0	0	0	1	0	0
SPRED3_Kwon201107_XENLA_00062135	1	1	0	0	1	1	1	0
SUPT5H_TeperekTkacz201206_XENLA_00027151	0	1	0	0	0	1	1	0
SUV39H1_Kwon201107_XENLA_00067251	0	1	0	0	0	1	1	0
SUV39H1_XeXenL6RMv10012598m	0	1	0	0	0	1	1	0
TBC1D25_Taira201203_XENLA_tissue_00174626	0	1	0	0	0	1	1	0
TIMM17B_mgEST_Xl4jul2012_1013117028	0	1	1	0	0	1	1	0
TIMM50_Kwon201107_XENLA_00038439	0	1	0	0	0	1	1	0
XB-GENE-5961850_Taira201203_XENLA_tissue_00261442	0	0	0	0	0	0	0	0
XB-GENE-5961850_XeXenL6RMv10012566m	0	0	0	0	0	0	0	0
ARL6_XeXenL6RMv10012665m	0	1	0	0	0	1	1	1
BC071050.1	0	1	0	0	0	1	1	0
BC097752.1	0	1	0	0	1	1	1	0
C21ORF91_Taira201203_XENLA_stage_00122264	0	1	0	0	0	1	1	0
C21ORF91_Taira201203_XENLA_tissue_00008703	0	1	0	0	0	1	1	0
CADM2_Ismailoglu201203_XENLA_00008762	0	0	0	0	0	0	0	0
CADM2_Ismailoglu201203_XENLA_00043673	0	0	0	1	0	1	1	0
CADM2_Taira201203_XENLA_tissue_00036797	0	0	0	0	0	1	0	0
CHMP2B_XeXenL6RMv10012639m	1	1	1	0	1	1	1	0
CHODL_Taira201203_XENLA_stage_00210801	0	0	0	0	0	0	0	0
CPOX_Quigley201112_XENLA_00088355	0	1	1	0	0	1	1	0
CPOX_XeXenL6RMv10012673m	0	1	1	0	0	1	1	0
CRYBG3_XeXenL6RMv10012669m	0	0	0	0	0	0	0	0
EPHA3_Taira201203_XENLA_tissue_00077309	0	0	0	0	0	1	0	0
EPHA3_XeXenL6RMv10012648m	0	0	0	0	0	0	0	0
EPHA6_Kwon201107_XENLA_00042775	0	0	0	0	0	0	0	1
EPHA6_Taira201203_XENLA_tissue_00149478	0	0	0	0	0	1	0	1
EPHA6_Taira201203_XENLA_tissue_00204655	0	0	0	1	0	0	0	1
GABRR3_Taira201203_XENLA_tissue_00147030	0	0	0	0	0	0	0	0
HTR1F_XeXenL6RMv10012643m	0	0	0	0	0	0	0	0
JAM2_Quigley201207_XENLA_00098457	0	0	0	0	0	0	0	0
MINA_Kwon201107_XENLA_00003065	0	1	0	0	0	1	1	0
NA_Horb201201_XENLA_00041181	0	0	0	0	0	0	0	1
NA_TeperekTkacz201206_XENLA_00097536	0	0	0	0	0	0	0	0
NA_XeXenL6RMv10012637m	0	0	0	0	0	1	0	0
NA_XeXenL6RMv10012682m	0	0	0	0	0	0	0	0
NM_001094062.1	0	1	0	0	0	1	1	1
NM_001094589.1	0	0	0	0	0	0	0	0
NSUN3_Taira201203_XENLA_stage_00022297	0	0	0	0	0	0	0	0
NSUN3_Taira201203_XENLA_stage_00110635	0	1	0	0	0	1	1	0
NSUN3_XeXenL6RMv10012659m	0	1	0	0	0	1	1	0
POU1F1_XeXenL6RMv10012641m	0	0	0	0	0	0	0	0
PROS1_XeXenL6RMv10012649m	0	0	0	0	0	1	0	0
TTC18_Taira201203_XENLA_stage_00191716	1	1	0	0	1	1	1	0
ZNF654_Ismailoglu201203_XENLA_00010871	0	1	1	0	0	1	1	0
GXYLT2_Taira201203_XENLA_tissue_00005338	1	1	0	0	1	1	1	0
PDZRN3_Kwon201107_XENLA_00109795	1	0	0	0	1	0	0	0
PDZRN3_Taira201203_XENLA_stage_00053285	1	0	0	0	1	0	0	0
PPP4R2_Kwon201107_XENLA_00136610	0	1	0	0	1	1	1	0
BAX_Taira201203_XENLA_stage_00179496	0	1	0	0	0	1	1	0
FUT2_Taira201203_XENLA_tissue_00288845	0	0	0	0	0	0	0	0
FUZ_Quigley201112_XENLA_00019363	0	1	0	0	0	1	1	0
FUZ_Quigley201112_XENLA_00020676	0	1	0	0	0	1	0	0
FUZ_XeXenL6RMv10012996m	0	1	0	0	0	1	1	0
KRAS_XeXenL6RMv10012966m	0	1	0	0	0	1	1	0
LENG8_Taira201203_XENLA_tissue_00035420	1	1	0	0	1	1	1	0
LENG9_Taira201203_XENLA_stage_00202557	0	1	0	0	0	1	1	0
NAPSA_XeXenL6RMv10012995m	0	1	0	0	0	1	1	0
NA_Taira201203_XENLA_stage_00066502	1	1	0	0	1	1	1	0
NA_Taira201203_XENLA_stage_00158350	0	0	0	0	0	1	0	0
NA_TeperekTkacz201206_XENLA_00067407	1	1	0	0	0	1	1	0
NA_XeXenL6RMv10012980m	0	0	0	0	0	1	0	0
NM_001093946.1	0	1	0	0	1	1	1	0
NM_001097055.1	1	0	0	0	1	1	0	0
NM_001127728.1	0	1	0	0	0	1	1	0
NM_001143899.1	0	0	0	0	0	0	0	0
NP_001072902.1_XeXenL6RMv10012991m	0	1	0	0	0	1	1	0
SLC6A16_Taira201203_XENLA_stage_00160707	0	1	0	0	0	1	1	0
TEAD4_Ismailoglu201203_XENLA_00009486	1	1	0	0	1	1	1	0
TTYH1_Taira201203_XENLA_stage_00150344	0	1	0	0	1	1	1	0
ADAM9_Taira201203_XENLA_stage_00111657	1	1	0	0	0	1	1	0
ASH2L_Kwon201107_XENLA_00108365	0	1	0	1	0	1	1	1
F6PUH8_XENTR_XeXenL6RMv10013017m	1	1	0	0	1	1	1	0
GRK5_Taira201203_XENLA_tissue_00154339	0	1	0	0	0	1	1	1
NA_Park201106_XENLA_00132878	1	0	0	0	1	0	0	0
NA_XeXenL6RMv10013035m	0	1	0	0	0	1	0	0
NM_001096476.1	0	0	0	0	0	0	0	1
NODAL1_XeXenL6RMv10013041m	0	1	0	0	0	1	0	0
NODAL2_XeXenL6RMv10013039m	0	0	0	0	0	1	0	1
PLEKHA2_Taira201203_XENLA_tissue_00188964	0	1	0	0	0	1	0	0
TM2D2_Taira201203_XENLA_tissue_00268450	1	1	0	0	0	1	1	0
WHSC1L1_Kwon201107_XENLA_00048450	1	1	0	0	1	1	1	0
ADAMTS15_Taira201203_XENLA_tissue_00001205	0	1	0	0	0	1	0	0
ST14_Kwon201107_XENLA_00030055	1	1	0	0	1	1	1	0
ADCY6_Taira201203_XENLA_tissue_00208565	0	0	0	0	0	0	0	0
CCNT1_Taira201203_XENLA_stage_00123987	0	1	0	0	0	1	1	0
CCNT1_Taira201203_XENLA_tissue_00282715	0	1	0	0	0	1	1	0
F6WVR6_XENTR_Taira201203_XENLA_tissue_00156865	0	0	0	0	0	0	0	0
GRASP_Ismailoglu201203_XENLA_00016663	0	1	0	0	1	1	1	0
GRASP_Ismailoglu201203_XENLA_00062362	0	1	0	0	1	1	1	0
LPAR6_TeperekTkacz201206_XENLA_00019771	0	0	0	0	0	1	0	0
LRCH1_Ismailoglu201203_XENLA_00058468	0	0	0	0	0	0	0	0
MED4_Taira201203_XENLA_tissue_00001047	0	1	1	0	0	1	1	0
NA_Kwon201107_XENLA_00127770	0	1	1	0	0	1	1	0
NA_Quigley201207_XENLA_00053533	0	1	0	0	0	1	1	0
NA_Quigley201207_XENLA_00113042	0	1	0	0	0	1	1	0
NA_Quigley201207_XENLA_00117577	0	1	1	0	0	1	1	0
NCKAP5L_Kwon201107_XENLA_00082726	0	1	0	0	0	1	1	0
NCKAP5L_Kwon201107_XENLA_00134358	0	1	0	0	0	1	1	0
NM_001086690.1	0	1	0	0	0	1	1	0
NM_001087329.1	0	1	0	0	0	1	1	0
NM_001087340.1	0	1	0	0	0	1	1	0
NM_001090880.1	0	1	0	0	0	1	1	0
NM_001093857.1	0	1	0	0	0	1	1	0
NR4A1_Taira201203_XENLA_tissue_00188725	0	1	0	0	0	1	1	0
PRPF40B_Ismailoglu201203_XENLA_00012143	0	1	0	0	0	1	1	0
PRPF40B_XeXenL6RMv10013405m	0	0	0	0	0	0	0	0
RCBTB2_Taira201203_XENLA_tissue_00197723	0	1	0	0	0	1	1	1
SUCLA2_Ismailoglu201203_XENLA_00045808	0	1	0	0	0	1	1	0
TMBIM6_Taira201203_XENLA_stage_00007988	0	1	0	0	0	1	1	0
HNRNPU_XeXenL6RMv10013437m	0	1	0	0	0	1	1	0
PLEKHG1_Kwon201107_XENLA_00006289	0	0	0	0	0	0	0	0
PPPDE1_Taira201203_XENLA_stage_00009414	0	1	0	0	0	1	1	0
CDX2_Taira201203_XENLA_stage_00057611	1	1	0	0	1	1	1	0
GSX1_XeXenL6RMv10014015m	1	0	0	0	1	1	0	0
GTF3A_Ismailoglu201203_XENLA_00029720	0	1	0	0	0	1	1	0
GTF3A_Taira201203_XENLA_stage_00067285	0	1	0	0	0	1	1	0
LNX2_Taira201203_XENLA_tissue_00222003	0	1	0	0	0	1	1	0
NM_001085721.1	0	0	0	0	0	0	0	0
PAN3_XeXenL6RMv10014009m	0	1	0	0	0	1	1	0
PDX1_Taira201203_XENLA_tissue_00086259	0	0	0	0	0	1	0	0
POLR1D.1_mgEST_Xl4jul2012_1013106216	0	1	0	0	0	1	1	0
POLR1D.1_XeXenL6RMv10014017m	0	1	0	0	0	1	1	0
SLC46A3_Ismailoglu201203_XENLA_00053555	0	1	0	0	0	1	1	0
1110054O05RIK_Amin201106_XENLA_00046324	0	1	1	0	0	1	1	0
AKAP2_Taira201203_XENLA_tissue_00072043	1	1	0	0	1	1	1	0
BC072378.1	1	1	0	0	1	1	1	0
BC110976.1	0	1	0	0	0	1	1	0
DCAF10_XeXenL6RMv10014121m	0	1	1	0	0	1	1	0
FRMPD1_XeXenL6RMv10014124m	0	0	0	0	0	0	0	0
HSDL2_Kwon201107_XENLA_00106900	0	1	0	0	1	1	1	0
HSDL2_TeperekTkacz201202_XENLA_00122262	0	1	0	0	1	1	1	0
KIAA1958_Taira201203_XENLA_tissue_00252380	0	0	0	0	0	0	0	0
KIAA1958_XeXenL6RMv10014113m	0	0	0	0	0	0	0	0
NA_Taira201203_XENLA_tissue_00055214	0	1	0	0	0	1	1	0
NA_Taira201203_XENLA_tissue_00100520	0	0	0	0	0	0	0	0
NA_Taira201203_XENLA_tissue_00240303	0	1	1	0	0	1	1	0
NA_XeXenL6RMv10014130m	0	1	1	0	0	1	1	0
NM_001085912.1	0	1	1	0	0	1	1	0
NM_001171867.1	0	1	0	0	0	1	1	0
SNX30_Taira201203_XENLA_tissue_00138273	0	1	1	0	0	1	1	0
SUSD1_Taira201203_XENLA_tissue_00050937	1	0	0	0	0	1	0	0
SUSD1_XeXenL6RMv10014106m	1	0	0	0	0	0	0	0
UGCG_Quigley201207_XENLA_00105047	0	1	0	0	0	1	1	0
ZBTB5_Taira201203_XENLA_tissue_00242715	0	1	0	0	0	1	1	0
ZCCHC7_Ismailoglu201203_XENLA_00021641	0	1	0	0	0	1	1	0
BC077345.1	0	1	0	0	0	1	1	0
BNIP1_Taira201203_XENLA_tissue_00232169	0	1	0	0	0	1	1	0
DPYSL3_mgEST_Xl4jul2012_1013252071	1	1	0	0	1	1	1	0
HMP19_Taira201203_XENLA_tissue_00083356	1	1	0	0	1	1	1	0
JAKMIP2_XeXenL6RMv10014440m	0	0	0	0	0	0	0	0
MSX2_Taira201203_XENLA_tissue_00227253	1	1	0	0	1	1	1	0
NA_Kwon201107_XENLA_00136572	0	1	0	0	0	1	1	0
STC2_Taira201203_XENLA_tissue_00237902	0	1	0	0	0	1	1	0
STK32A_Taira201203_XENLA_tissue_00018664	0	0	0	0	1	0	0	0
SETBP1_Ismailoglu201203_XENLA_00068000	0	0	0	0	0	0	0	0
SETBP1_TC460629	0	0	0	0	0	0	0	0
ANXA13_Taira201203_XENLA_tissue_00204793	0	0	0	1	0	0	0	1
ATAD2_Taira201203_XENLA_stage_00093814	0	1	0	0	0	1	1	0
ATAD2_Taira201203_XENLA_stage_00096505	0	1	0	0	0	1	1	0
FAM83A_Taira201203_XENLA_stage_00199554	0	0	0	0	0	0	0	0
FAM91A1_Ismailoglu201203_XENLA_00009231	0	0	0	0	0	1	0	0
FAM91A1_XeXenL6RMv10014713m	0	1	0	0	1	1	1	0
FER1L6_Taira201203_XENLA_tissue_00169846	0	0	0	0	0	0	0	0
FER1L6_XeXenL6RMv10014714m	1	0	0	0	1	0	0	0
NA_Taira201203_XENLA_tissue_00062640	0	1	0	0	0	1	1	0
WDYHV1_Kwon201107_XENLA_00118538	0	1	0	0	0	1	1	0
AF043188.1	0	0	0	0	0	1	0	0
AKNA_Taira201203_XENLA_tissue_00087627	1	1	0	0	0	1	1	0
BC169584.1	0	1	0	0	0	1	1	0
HCFC1_Ismailoglu201203_XENLA_00015005	0	1	0	0	0	1	1	0
IRAK1_Kwon201107_XENLA_00034621	1	1	0	0	1	1	1	0
IRAK1_XeXenL6RMv10015359m	1	1	0	0	1	1	1	0
MECP2_Taira201203_XENLA_tissue_00110848	1	1	1	0	1	1	1	0
NA_XeXenL6RMv10015355m	0	0	0	0	0	0	0	0
NM_001087704.1	0	1	0	0	0	1	1	0
NM_001088385.1	1	1	1	0	1	1	1	0
NM_001092117.1	1	1	0	0	1	1	1	0
NM_001094520.1	0	1	0	0	0	1	1	0
NM_001095611.1	0	1	0	0	0	1	1	0
TMEM187_Taira201203_XENLA_tissue_00277043	0	1	0	0	0	1	1	0
CLMP_Taira201203_XENLA_tissue_00246188	0	0	0	0	0	0	0	1
BSDC1_Taira201203_XENLA_tissue_00158136	0	1	1	0	0	1	1	0
FAM176B_Taira201203_XENLA_tissue_00264460	0	0	0	0	0	1	0	1
HDAC1_TC417177	0	1	0	0	0	1	1	0
LCK_TC416520	0	0	0	0	0	0	0	0
MARCKSL1_TC461177	0	1	0	0	0	1	1	0
MARCKSL1_TeperekTkacz201202_XENLA_00040316	0	1	0	0	0	1	1	0
MRPS15_Ismailoglu201203_XENLA_00040336	0	1	0	0	0	1	1	0
MRPS15_Taira201203_XENLA_tissue_00132500	0	1	0	0	0	1	1	0
NM_001094001.1	0	1	0	0	0	1	1	0
NM_001094195.1	0	1	0	0	0	1	1	0
NM_001099873.1	0	0	0	0	0	0	0	0
OSCP1_Quigley201207_XENLA_00070040	0	1	0	0	0	1	1	0
OSCP1_Taira201203_XENLA_tissue_00238889	0	1	0	0	0	1	1	0
STK40_XeXenL6RMv10015764m	0	0	0	0	0	1	0	0
TMEM234_Park201106_XENLA_00008096	0	1	0	0	0	1	1	0
TMEM234_XeXenL6RMv10015746m	0	1	0	0	0	1	1	0
X78454.1	0	1	0	0	0	1	1	0
XB-GENE-5904724_Audic201207_XENLA_00000182	0	0	0	0	0	0	0	0
BCL2_Taira201203_XENLA_tissue_00194907	1	0	0	0	1	0	0	0
CARD11_XeXenL6RMv10015842m	0	0	0	0	0	1	0	0
CDH20_Kwon201107_XENLA_00107057	0	0	0	0	0	0	0	0
KIAA1468_Taira201203_XENLA_stage_00073740	1	1	0	0	1	1	1	0
KIAA1468_XeXenL6RMv10015843m	1	1	0	0	1	1	1	0
NA_Taira201203_XENLA_tissue_00104745	0	0	0	0	0	0	0	0
NM_001092475.1	0	1	0	0	0	1	1	0
NP_001107693.1_Kwon201107_XENLA_00056912	0	1	0	0	0	1	1	0
PHLPP1_Taira201203_XENLA_tissue_00156078	1	1	0	0	1	1	1	0
PIGN_Amin201106_XENLA_00078635	0	0	0	0	0	0	0	0
PIGN_Ismailoglu201203_XENLA_00019065	0	0	0	0	0	0	0	0
PIGN_XeXenL6RMv10015839m	1	0	0	0	1	0	0	0
TNFRSF11A_Taira201203_XENLA_tissue_00290531	1	1	0	0	1	1	1	0
VPS4B_TC417500	0	1	1	0	0	1	1	0
ARFIP1_Taira201203_XENLA_stage_00086722	0	1	0	0	0	1	1	0
ARFIP1_Taira201203_XENLA_stage_00115069	0	1	0	0	0	1	1	0
DCLK1_XeXenL6RMv10015898m	0	1	0	0	0	1	1	0
FAM160A1_Quigley201112_XENLA_00060582	0	0	0	0	0	0	0	0
FAM160A1_XeXenL6RMv10015911m	0	0	0	0	0	1	0	0
FBXW7_Quigley201207_XENLA_00059382	1	1	1	0	1	1	1	0
FBXW7_Taira201203_XENLA_stage_00036083	1	0	0	0	1	1	0	0
FHDC1_XeXenL6RMv10015926m	0	1	0	0	0	1	1	0
KIAA0922_Kwon201107_XENLA_00035856	0	1	0	0	0	1	1	0
LRBA_Taira201203_XENLA_stage_00036699	0	0	0	0	0	0	0	0
LRBA_TeperekTkacz201206_XENLA_00097642	0	0	0	0	0	1	0	0
NA_Ismailoglu201203_XENLA_00015402	0	1	1	0	0	1	1	0
NA_Taira201203_XENLA_stage_00091381	0	1	0	0	0	1	0	0
NA_Taira201203_XENLA_tissue_00269472	0	1	0	0	0	1	1	0
NM_001086856.1	1	1	0	0	1	1	1	0
NM_001092023.1	0	0	0	0	0	1	0	0
NM_001096770.1	1	1	0	0	1	1	1	0
Q28DX7_XENTR_Horb201201_XENLA_00210654	1	1	0	0	1	1	1	0
SFRP2_Ismailoglu201203_XENLA_00017150	1	1	0	0	1	1	1	0
SFRP2_Ismailoglu201203_XENLA_00036554	1	1	0	0	1	1	1	0
SFRP2_Ismailoglu201203_XENLA_00042592	1	1	0	0	1	1	1	0
TLR2_Taira201203_XENLA_tissue_00066703	0	1	0	0	1	1	0	0
TLR2_XeXenL6RMv10015932m	0	0	0	0	0	1	0	0
DMRT1_Taira201203_XENLA_tissue_00089039	1	0	0	0	1	1	0	0
DMRT2_Taira201203_XENLA_tissue_00041735	1	0	0	0	1	1	1	0
NM_001088529.1	0	1	0	0	0	1	1	0
NP_001122112.1_XeXenL6RMv10016064m	1	0	0	0	1	0	0	0
XB-GENE-5815363_Ismailoglu201203_XENLA_00013803	0	0	0	0	0	1	0	0
XB-GENE-5815363_Quigley201112_XENLA_00061703	0	0	0	0	0	1	0	0
XB-GENE-5878454_Taira201203_XENLA_stage_00110990	0	0	0	0	0	0	0	0
XB-GENE-5878454_Taira201203_XENLA_tissue_00148436	0	0	0	0	0	0	0	0
AW549877_Taira201203_XENLA_tissue_00291967	0	1	0	0	0	1	1	0
BC081195.1	0	1	0	0	0	1	1	0
BC128687.1	1	0	0	0	1	1	0	0
C6.2_Taira201203_XENLA_tissue_00109770	0	0	0	0	0	0	0	0
DAB2_XeXenL6RMv10016333m	0	1	0	0	0	1	1	0
FBXO4_Ismailoglu201203_XENLA_00050624	0	1	0	0	0	1	1	0
FGF10_Taira201203_XENLA_tissue_00010125	1	0	0	0	1	1	0	0
FST_TC424338	1	0	0	0	1	1	0	1
FST_XeXenL6RMv10016283m	1	0	0	0	1	1	0	1
GHR_Kwon201107_XENLA_00123738	1	0	0	0	1	0	0	1
HCN1_XeXenL6RMv10016296m	0	0	0	0	0	0	0	0
ISL1_XeXenL6RMv10016290m	1	1	0	0	1	1	1	1
ITGA2_Taira201203_XENLA_tissue_00089342	0	0	0	0	1	1	0	0
MOCS2_Horb201201_XENLA_00169677	0	0	0	0	0	1	0	0
MOCS2_XeXenL6RMv10016286m	0	0	0	0	0	1	0	0
MRPS30_Ismailoglu201203_XENLA_00072999	0	1	1	0	0	1	1	0
NA_Taira201203_XENLA_tissue_00201820	0	0	0	0	0	1	0	0
NDUFS4_Audic201207_XENLA_00002948	0	1	0	0	0	1	1	0
NIM1_XeXenL6RMv10016305m	0	0	0	0	0	0	0	0
NM_001086345.1	0	1	0	0	1	1	1	0
NM_001086930.1	1	1	0	0	1	1	1	0
NM_001089715.1	0	0	0	0	0	0	0	0
NM_001091779.1	0	1	0	0	0	1	0	1
NM_001093148.1	0	0	0	0	1	0	0	0
NM_001094957.1	0	1	0	0	0	1	1	0
NNT_TC441760	1	1	0	0	1	1	1	0
NP_001090853.1_Amin201106_XENLA_00060218	1	1	0	0	1	1	1	1
NP_001090853.1_Taira201203_XENLA_stage_00139283	1	1	0	0	1	1	1	1
OXCT1_Park201106_XENLA_00028048	0	1	0	0	0	1	1	0
PLCXD3_Taira201203_XENLA_tissue_00016556	0	0	0	0	0	0	0	0
PLCXD3_XeXenL6RMv10016318m	0	0	0	0	0	1	0	0
S69801.1	1	0	0	0	1	1	0	1
SEPP1_Kwon201107_XENLA_00015837	1	0	0	0	1	1	0	0
TTC33_Park201106_XENLA_00175043	0	0	0	1	1	0	0	1
ZNF131_Ismailoglu201203_XENLA_00002279	0	1	0	0	0	1	1	1
ZNF131_Ismailoglu201203_XENLA_00036384	0	1	0	0	0	1	1	1
DNMT3A_Audic201207_XENLA_00000064	0	0	0	0	0	0	0	0
DNMT3A_Ismailoglu201203_XENLA_00000859	0	0	0	0	0	0	0	0
DPYSL5_Taira201203_XENLA_stage_00087308	0	0	0	0	0	0	0	0
DPYSL5_XeXenL6RMv10016392m	0	0	0	0	0	0	0	0
NA_Park201106_XENLA_00033537	0	0	0	0	0	0	0	0
ADAMTS20_Amin201106_XENLA_00050850	0	0	0	0	0	0	0	0
ADAMTS20_Taira201203_XENLA_tissue_00123488	0	1	0	0	0	1	1	0
ADAMTS20_Taira201203_XENLA_tissue_00133516	0	0	0	0	0	0	0	0
ADAMTS20_Taira201203_XENLA_tissue_00279413	0	0	0	0	0	0	0	0
AMIGO2_Taira201203_XENLA_tissue_00052285	0	0	0	0	0	0	0	0
ANO6_Amin201106_XENLA_00026123	0	0	0	0	0	1	0	0
ANO6_XeXenL6RMv10016462m	0	0	0	0	0	0	0	0
ARID2_TC414557	0	1	0	0	0	1	0	0
ARID2_XeXenL6RMv10016463m	0	1	0	0	0	1	1	0
F6QY47_XENTR_XeXenL6RMv10016477m	0	0	0	0	0	0	0	0
F6S380_XENTR_XeXenL6RMv10016461m	0	0	0	0	0	0	0	0
IRAK4_XeXenL6RMv10016452m	0	1	0	0	0	1	1	0
LRIG3_Taira201203_XENLA_stage_00165144	0	1	0	0	0	1	1	0
MCOLN1_TC416566	0	1	1	0	0	1	1	0
NA_Taira201203_XENLA_tissue_00170566	0	1	0	0	0	1	1	0
NAV3_Taira201203_XENLA_stage_00092006	0	0	0	0	0	0	0	0
NAV3_XeXenL6RMv10016501m	0	0	0	1	0	0	0	0
NELL2_TC413908	1	1	0	0	1	1	1	0
NM_001086785.1	0	1	0	0	0	1	1	0
NM_001091056.1	0	1	0	0	0	1	1	0
NM_001091328.1	0	1	0	0	0	1	1	0
NM_001093606.1	0	0	0	0	0	1	0	0
PAWR_TeperekTkacz201202_XENLA_00094026	1	1	0	0	1	1	1	0
PPP1R12A_Ismailoglu201203_XENLA_00062101	0	1	0	0	0	1	1	0
PRICKLE1_TeperekTkacz201206_XENLA_00045289	0	0	0	0	0	1	0	0
PUS7L_XeXenL6RMv10016450m	0	1	0	0	0	1	1	0
SLC16A7_Amin201106_XENLA_00017875	0	0	0	0	0	0	0	0
SLC38A1_Taira201203_XENLA_tissue_00072633	0	1	0	0	0	1	0	0
SLC38A2_Chung201110_XENLA_00048566	0	0	0	0	0	1	0	0
SLC38A4_Taira201203_XENLA_tissue_00011310	0	0	0	0	0	1	0	0
SYT1_Kwon201107_XENLA_00111893	0	0	0	1	0	0	0	1
TMEM117_Ismailoglu201203_XENLA_00055421	0	1	0	0	0	1	1	0
USP15_Taira201203_XENLA_tissue_00012884	0	1	1	0	0	1	1	0
USP15_XeXenL6RMv10016489m	0	1	1	0	0	1	1	0
ACPP_Taira201203_XENLA_tissue_00144118	0	0	0	0	0	0	0	0
BFSP2_XeXenL6RMv10016695m	0	1	0	0	0	0	0	0
CDV3_Taira201203_XENLA_tissue_00086486	0	1	0	0	0	1	1	0
DNAJC13_Kwon201107_XENLA_00032270	0	1	0	0	0	1	1	0
DNAJC13_Kwon201107_XENLA_00102707	0	0	0	0	0	0	0	0
MRPL3_Ismailoglu201203_XENLA_00015129	0	1	0	0	0	1	1	0
NA_Kwon201107_XENLA_00137662	0	0	0	0	0	1	0	0
NA_XeXenL6RMv10016694m	0	0	0	0	0	1	0	0
NP_001072436.1_Quigley201207_XENLA_00006824	0	0	0	1	0	0	0	0
NP_001072436.1_Taira201203_XENLA_stage_00207177	0	0	0	1	0	1	0	0
TOPBP1_Taira201203_XENLA_stage_00044099	0	1	0	0	0	1	1	0
TOPBP1_TC413724	0	0	0	0	0	0	0	0
AF009820.1	0	1	0	1	1	1	0	1
COPZ1_TC426281	0	1	0	0	0	1	1	0
HDAC7_XeXenL6RMv10016814m	0	0	0	0	1	0	0	0
HNRNPA1_Taira201203_XENLA_stage_00042678	0	1	0	0	0	1	1	0
HNRNPA1_Taira201203_XENLA_stage_00161210	0	1	0	0	0	1	1	0
ITGA5_Kwon201107_XENLA_00022426	0	0	0	0	0	0	0	0
ITGA5_Taira201203_XENLA_tissue_00286819	1	1	0	0	1	1	1	0
NA_Taira201203_XENLA_tissue_00122659	0	1	0	0	0	1	0	0
NA_TC446387	0	1	0	0	1	1	0	0
NEUROD4_Taira201203_XENLA_stage_00079427	0	0	0	0	0	0	0	0
NM_001087220.1	0	1	0	0	0	1	1	0
NM_001087394.1	0	1	0	0	0	1	1	0
NM_001087631.1	0	0	0	0	0	0	0	0
NM_001095191.1	0	0	0	0	0	1	0	0
NM_001197284.1	0	0	0	0	1	0	0	0
PDE1B_Taira201203_XENLA_tissue_00281855	0	0	0	1	0	0	0	1
PDE1B_XeXenL6RMv10016806m	0	1	0	1	0	1	1	1
PPP1R1A_Taira201203_XENLA_tissue_00272029	0	0	0	0	1	0	0	0
RAPGEF3_Kwon201107_XENLA_00057360	0	1	0	0	1	1	1	0
RAPGEF3_XeXenL6RMv10016810m	0	0	0	0	0	1	0	0
SLC48A1_Taira201203_XENLA_stage_00199666	0	1	0	0	0	1	1	0
TWIST2_Taira201203_XENLA_tissue_00202347	0	0	0	0	0	0	0	0
U12646.1	0	0	0	0	0	0	0	0
ZNF385A_Taira201203_XENLA_tissue_00004935	0	1	0	0	1	1	1	0
BC094077.1	0	1	0	0	0	1	1	0
CA7_Taira201203_XENLA_stage_00065574	1	0	0	0	1	1	0	0
CA7_TeperekTkacz201202_XENLA_00075957	1	0	0	0	1	1	0	0
CDH16_XeXenL6RMv10016881m	0	0	0	0	0	0	0	0
CYBA_Taira201203_XENLA_tissue_00036330	0	0	0	0	0	1	0	0
GPI_Taira201203_XENLA_tissue_00196666	0	1	0	0	0	1	1	0
KCTD15_Taira201203_XENLA_tissue_00160732	0	0	0	0	0	0	0	0
KCTD15_TC415709	0	0	0	0	0	0	0	0
KIAA0355_Taira201203_XENLA_tissue_00009727	0	1	0	0	0	1	1	0
LSM14A_Kwon201107_XENLA_00047839	0	1	0	0	0	1	1	0
LSM14A_Park201106_XENLA_00130404	0	1	0	0	0	1	1	0
MVD_Taira201203_XENLA_stage_00095744	0	1	0	0	0	1	1	0
NM_001085630.1	0	0	0	0	0	0	0	0
NM_001092750.1	0	0	0	0	0	0	0	0
NM_001093549.1	0	0	0	0	0	1	0	0
PDP2_Taira201203_XENLA_stage_00022351	0	0	0	0	0	1	1	0
SS18L2_Kwon201107_XENLA_00108409	0	1	1	0	0	1	1	0
UBA2_XeXenL6RMv10016872m	1	1	0	0	1	1	1	0
WTIP_Taira201203_XENLA_tissue_00050086	1	1	0	0	1	1	1	0
WTIP_TC418217	1	1	0	0	1	1	1	0
ZC3H18_Taira201203_XENLA_tissue_00171267	0	1	0	0	0	1	1	0
ZC3H18_Taira201203_XENLA_tissue_00203017	0	0	0	0	0	1	0	0
ZFPM1_Taira201203_XENLA_stage_00192680	1	1	0	0	0	1	1	0
ZFPM1_Taira201203_XENLA_tissue_00277736	1	1	0	0	0	1	1	0
ALKBH5_Veenstra201204_XENLA_00023396	0	1	0	0	0	1	1	0
ALKBH5_XeXenL6RMv10017219m	0	1	0	0	0	1	1	0
MYO15A_XeXenL6RMv10017217m	0	0	0	0	0	0	0	0
ADAMTS9_Park201106_XENLA_00070628	1	1	0	0	1	1	1	0
ADAMTS9_Park201106_XENLA_00134117	1	1	0	0	1	1	1	0
ADAMTS9_Park201106_XENLA_00139534	1	1	0	0	1	1	1	0
ADAMTS9_Taira201203_XENLA_stage_00167305	1	1	0	0	1	1	1	0
MAGI1_Ismailoglu201203_XENLA_00003337	0	0	0	0	0	1	0	0
MAGI1_Ismailoglu201203_XENLA_00054294	0	0	0	0	0	0	0	0
MAGI1_TeperekTkacz201206_XENLA_00062423	0	1	0	0	0	1	1	0
BCORL1_Taira201203_XENLA_tissue_00142986	1	1	0	0	1	1	1	0
ATP1A1_Quigley201207_XENLA_00009023	0	1	0	0	1	1	0	0
ATP1A1_Quigley201207_XENLA_00018621	0	1	0	0	0	1	1	0
NM_001091078.1	0	1	0	0	0	1	1	0
POGLUT1_XeXenL6RMv10017844m	0	0	0	0	0	1	0	0
SLC22A15.1_Park201106_XENLA_00054694	0	1	0	0	0	1	1	0
TIMMDC1_Taira201203_XENLA_stage_00198954	0	1	0	0	0	1	1	0
TIMMDC1_Taira201203_XENLA_tissue_00137196	0	1	0	0	0	1	1	0
VANGL1_Taira201203_XENLA_stage_00107524	0	0	0	0	0	1	0	0
BC133272.1	0	1	1	0	0	1	1	0
FASTKD5_Ismailoglu201203_XENLA_00026441	0	1	1	0	0	1	1	0
NA_TC437525	1	1	0	0	0	1	1	0
NM_001095925.1	0	1	0	0	0	1	1	0
NP_001107550.1_Taira201203_XENLA_tissue_00037322	0	0	0	0	0	0	0	0
OXT_Taira201203_XENLA_stage_00199952	0	0	0	0	0	0	0	0
OXT_XeXenL6RMv10017972m	0	0	0	0	0	0	0	0
PROSAPIP1_Ismailoglu201203_XENLA_00000746	1	1	0	0	1	1	1	0
NM_001092722.1	0	1	0	0	0	1	1	0
FCHSD2_Quigley201207_XENLA_00082917	0	0	0	0	0	1	1	0
FCHSD2_TeperekTkacz201206_XENLA_00096362	0	1	0	0	0	1	1	0
FCHSD2_XeXenL6RMv10018714m	0	0	0	0	0	0	0	0
GDPD5_Amin201106_XENLA_00086793	0	0	0	0	0	0	0	0
GDPD5_Taira201203_XENLA_tissue_00221772	0	0	0	0	0	0	0	0
MYO7A_Taira201203_XENLA_tissue_00235374	0	0	0	0	0	0	0	1
NA_Taira201203_XENLA_tissue_00186003	0	0	0	0	1	0	0	0
NM_001127839.1	1	0	0	0	1	0	0	0
P2RY2_Taira201203_XENLA_stage_00037432	1	0	0	0	1	0	0	0
P2RY6_XeXenL6RMv10018708m	0	0	0	0	1	1	0	0
RPS3_Quigley201207_XENLA_00009480	0	1	0	0	0	1	1	0
SERPINH1_Ismailoglu201203_XENLA_00012712	1	0	0	0	1	0	0	0
SERPINH1_Taira201203_XENLA_stage_00135969	1	0	0	0	1	0	0	0
XB-GENE-877239_Horb201201_XENLA_00062710	0	0	0	0	0	0	0	1
XB-GENE-877239_Quigley201112_XENLA_00061089	0	0	0	0	0	0	0	1
NA_Park201106_XENLA_00059891	0	0	0	0	0	1	0	0
NA_XeXenL6RMv10018825m	0	0	0	0	0	1	0	0
SCN1B_Horb201201_XENLA_00111444	0	0	0	0	0	0	0	0
SCN1B_XeXenL6RMv10018826m	0	0	0	0	0	1	0	0
SLC35A3.2_mgEST_Xl4jul2012_1013096551	0	1	0	0	0	1	1	0
ACAP2_XeXenL6RMv10019056m	0	1	0	0	0	1	1	0
AHSG_Taira201203_XENLA_tissue_00039051	0	0	0	0	0	0	0	0
AY188284.1	0	0	0	0	0	0	0	0
B0JZZ7_XENTR_Taira201203_XENLA_stage_00039715	0	1	0	0	0	1	1	0
BC046856.1	0	1	0	0	0	1	1	0
BC108868.1	0	1	0	0	0	1	1	0
DLG1_Taira201203_XENLA_stage_00142186	1	1	0	0	1	1	1	1
DLG1_Taira201203_XENLA_stage_00202903	1	1	0	0	1	1	1	1
EIF4A1B_Taira201203_XENLA_tissue_00095892	0	1	0	0	0	1	1	0
F6RPR3_XENTR_Taira201203_XENLA_tissue_00073777	0	1	1	0	0	1	1	0
F6RPR3_XENTR_Taira201203_XENLA_tissue_00165240	0	1	1	0	0	1	1	0
F7CCX7_XENTR_Taira201203_XENLA_tissue_00208746	0	0	0	0	0	0	0	0
KNG1_Taira201203_XENLA_tissue_00192114	1	0	0	0	1	0	0	0
KNG1_Taira201203_XENLA_tissue_00253743	1	0	0	0	1	0	0	0
MCF2L.2_Taira201203_XENLA_tissue_00228467	0	0	0	0	0	0	0	0
MCF2L2_XeXenL6RMv10019076m	0	1	0	0	0	1	1	0
MFI2_Taira201203_XENLA_tissue_00240073	0	0	0	0	0	1	0	0
NA_XeXenL6RMv10019062m	0	1	0	0	0	1	1	0
PPP1R2_Quigley201112_XENLA_00043896	0	1	0	0	0	1	1	0
TOM1L1_Kwon201107_XENLA_00123302	1	0	0	1	1	0	0	1
TOM1L1_Taira201203_XENLA_tissue_00013021	0	0	0	0	0	1	0	0
NA_Kwon201107_XENLA_00085210	0	0	0	0	0	0	0	0
NA_Taira201203_XENLA_tissue_00213624	0	0	0	0	0	0	0	0
PHLDB3_TeperekTkacz201206_XENLA_00130974	0	0	0	0	0	1	0	0
NP_001106453.1_Quigley201112_XENLA_00047809	0	0	0	0	0	0	0	0
PSCA_TC444825	0	0	0	0	0	0	0	0
SLURP1_XeXenL6RMv10019981m	1	0	0	0	1	0	0	0
CRAC1_XENTR_Kwon201107_XENLA_00097936	1	0	0	0	1	0	0	0
NM_001094505.1	0	0	0	0	1	0	0	0
BC124857.1	0	0	0	0	1	0	0	0
HRSP12_Ismailoglu201203_XENLA_00025250	0	1	0	0	0	1	1	0
HRSP12_TC436194	0	1	0	0	0	1	1	0
KCNS2_Taira201203_XENLA_tissue_00054035	1	1	0	0	1	1	0	0
KCNS2_XeXenL6RMv10020518m	1	1	0	0	1	1	0	0
MATN2_Taira201203_XENLA_tissue_00262308	1	0	0	0	1	1	1	0
MTDH_Chung201110_XENLA_00032069	0	0	0	0	0	0	0	0
NM_001086029.1	0	0	0	0	1	0	0	0
NM_001087152.1	1	1	0	0	1	1	1	0
NM_001096403.1	1	0	0	0	1	1	0	0
OSR2_TeperekTkacz201206_XENLA_00111804	1	0	0	0	1	1	0	0
RPL30_XeXenL6RMv10020524m	1	1	0	0	1	1	1	0
STK3_Kwon201107_XENLA_00122547	0	1	0	0	0	1	1	0
AP2A2_TC451213	0	0	0	0	0	0	0	0
AP2A2_XeXenL6RMv10020597m	0	1	0	0	0	1	1	0
NA_XeXenL6RMv10020815m	0	1	0	0	0	1	0	0
NM_001089919.1	0	0	0	0	0	0	0	1
XB-GENE-5952315_Taira201203_XENLA_stage_00205666	0	0	0	0	0	0	0	0
XB-GENE-5952315_TeperekTkacz201206_XENLA_00039848	0	0	0	0	0	1	0	0
XB-GENE-5952315_XeXenL6RMv10020813m	0	0	0	0	0	0	0	0
NA_XeXenL6RMv10020904m	0	1	0	0	0	1	1	0
NM_001092399.1	0	1	0	0	0	1	1	0
XB-GENE-1002559_XeXenL6RMv10020905m	1	1	0	0	1	1	1	0
AMPD1_Taira201203_XENLA_tissue_00125788	0	0	0	0	0	0	0	0
AMPD1_Taira201203_XENLA_tissue_00149856	0	0	0	0	0	0	0	0
CSDE1_XeXenL6RMv10021097m	0	1	0	0	0	1	1	0
DENND2C_Taira201203_XENLA_stage_00125967	0	1	0	0	1	1	1	0
DENND2C_XeXenL6RMv10021094m	0	0	0	0	0	0	0	0
HIPK1_Taira201203_XENLA_stage_00130056	0	1	0	0	0	1	1	0
NM_001094976.1	0	0	0	0	0	0	0	0
NM_001095080.1	0	1	0	0	0	1	1	0
NM_001096557.1	0	0	0	0	0	0	0	0
NRAS_Taira201203_XENLA_stage_00028451	0	1	0	0	0	1	1	0
OLFML3_Taira201203_XENLA_tissue_00197968	0	0	0	0	0	0	0	0
TRIM33_Ismailoglu201203_XENLA_00065799	0	0	0	0	0	0	0	0
ATP6V0B_Amin201106_XENLA_00090799	0	1	0	0	1	1	1	0
B4GALT2_mgEST_Xl4jul2012_1013112455	1	1	0	0	1	1	1	0
B4GALT2_XeXenL6RMv10021134m	1	1	0	0	1	1	0	0
MAST2_Taira201203_XENLA_stage_00031750	1	1	0	0	1	1	1	0
PIK3R3_Kwon201107_XENLA_00017045	0	1	0	0	0	1	1	0
BAG3_TC415550	1	1	1	1	1	1	1	1
BC043785.1	0	1	0	0	0	1	1	0
[truncated: 32,374 more rows]
