# Supplementary material for: Sperm is epigenetically programmed to regulate gene transcription in embryos
Source: HighWire-hosted journal article supplement (doi:10.1101/gr.201541.115), 2016-03-31
Supplement: Supplemental_Table_S5.xlsx [file Supplemental_Table_S5.xlsx]

## Sheet: Sheet1
	H3K27me3	H3K4me3	H3K4me2	H3K9me3
Sperm Mis vs Sperm GW	0.0005387	0.1695	0.425	0.05865
Spermatid Mis vs Spermatid GW	0.0007277	0.1514	0.757	0.2072
Sperm Mis vs Spermatid Mis	0.3093	2.664e-07	5.402e-09	0.6962	we tested spermatid higher than sperm
