# Supplementary material for: Sperm is epigenetically programmed to regulate gene transcription in embryos
Source: HighWire-hosted journal article supplement (doi:10.1101/gr.201541.115), 2016-03-31
Supplement: Supplemental_Table_S6.xlsx [file Supplemental_Table_S6.xlsx]

## Sheet: Kdm6b-spermatid
gene_id	logFC	logCPM	LR	PValue	FDR
IKBKG_Taira201203_XENLA_tissue_00188442	5.90239	0.591484	111.544	4.49736e-26	9.14313e-22
S71764.1	8.1039	-1.32309	51.9252	5.76563e-13	5.86076e-09
OLFM4_Quigley201112_XENLA_00066091	1.50121	5.30187	40.1461	2.35658e-10	1.59697e-06
NM_001095525.1	1.25326	4.10158	36.9052	1.24013e-09	6.30294e-06
STK32A_Taira201203_XENLA_tissue_00018664	3.8153	-0.801683	31.6613	1.83542e-08	7.46281e-05
UNC13C_XeXenL6RMv10046080m	-4.48736	-1.73362	30.7575	2.92379e-08	9.90678e-05
NM_001092086.1	0.791347	5.97115	29.898	4.55391e-08	0.000132259
HOXA7_Taira201203_XENLA_stage_00116210	1.48941	2.52877	29.0634	7.00473e-08	0.000178008
CYP26C1_Taira201203_XENLA_stage_00087131	1.27556	4.36876	26.6576	2.42892e-07	0.000527071
NM_001088070.1	3.50442	-0.398465	26.5316	2.59258e-07	0.000527071
HOXA9_Taira201203_XENLA_tissue_00152468	1.45249	1.54786	24.5683	7.17202e-07	0.00130057
NFE2L1_Ismailoglu201203_XENLA_00045791	0.976053	5.68699	24.4373	7.67678e-07	0.00130057
NA_Horb201201_XENLA_00145901	1.75716	4.92339	24.2142	8.61925e-07	0.00134792
CA7_Taira201203_XENLA_stage_00065574	1.46354	3.34939	23.9176	1.0055e-06	0.00146013
LAMB1_Taira201203_XENLA_stage_00035701	0.795352	7.12702	23.7272	1.11002e-06	0.00150445
C6ORF103_Taira201203_XENLA_tissue_00058229	-1.99717	2.02369	23.3697	1.3367e-06	0.00169844
IRX4_XeXenL6RMv10025281m	1.44737	0.419185	22.8798	1.72455e-06	0.00205636
PARP12_Taira201203_XENLA_tissue_00244718	3.72321	2.66194	22.7755	1.82069e-06	0.00205636
HOXC5_Taira201203_XENLA_stage_00151302	1.29657	2.21181	22.5491	2.04843e-06	0.00208465
DNAH1_Taira201203_XENLA_tissue_00057826	-1.64395	4.15829	22.5468	2.05081e-06	0.00208465
FSTL5_Kwon201107_XENLA_00084103	-3.37502	0.505628	22.3666	2.25252e-06	0.00218066
SP9_Taira201203_XENLA_tissue_00169645	1.59785	0.90613	22.1263	2.55288e-06	0.0023591
NM_001088725.1	2.2729	2.29231	22.0016	2.72418e-06	0.00240794
NM_001173995.1	1.51058	0.716698	21.7826	3.05365e-06	0.00258669
AIM1_Taira201203_XENLA_tissue_00176210	0.805191	6.22004	21.4984	3.54119e-06	0.0026234
NM_001096464.1	1.44185	2.10552	21.4718	3.59068e-06	0.0026234
NM_001086251.1	1.39123	1.36324	21.4145	3.69967e-06	0.0026234
NM_001127798.1	1.26698	2.24046	21.4076	3.71296e-06	0.0026234
BMPR1B_XeXenL6RMv10018232m	1.12419	2.41801	21.3926	3.74218e-06	0.0026234
MYOM2_Quigley201207_XENLA_00103472	1.06116	2.81268	21.1382	4.27323e-06	0.00288209
FAM160A1_Taira201203_XENLA_stage_00170660	1.63145	2.45577	21.0845	4.39472e-06	0.00288209
NM_001127797.1	1.26454	3.50934	20.9405	4.73761e-06	0.00293998
UNC13D_XeXenL6RMv10043817m	-2.9721	1.83672	20.9266	4.77222e-06	0.00293998
AF173940.1	0.774074	4.81383	20.6414	5.53864e-06	0.00325333
LURAP1L_Taira201203_XENLA_tissue_00205007	2.42557	-0.9375	20.6177	5.60749e-06	0.00325333
X07104.1	1.8266	-0.334697	20.4904	5.99299e-06	0.00325333
NM_001090433.1	1.27814	0.849653	20.4506	6.11889e-06	0.00325333
AKR1CL1_Kwon201107_XENLA_00117307	2.76293	-0.1941	20.4232	6.20726e-06	0.00325333
NM_001094431.1	-2.50175	-0.443197	20.3748	6.36628e-06	0.00325333
X06592.1	1.63917	0.223054	20.3644	6.40103e-06	0.00325333
ANXA10_Taira201203_XENLA_stage_00029369	2.73881	-1.14355	20.2736	6.712e-06	0.00330886
NM_001161594.1	-2.58453	-0.134141	20.2386	6.83582e-06	0.00330886
NM_001087226.1	0.915133	3.358	20.1644	7.10623e-06	0.00333656
CD8A_TC438658	2.74064	0.946113	20.1337	7.22128e-06	0.00333656
C1ORF187_Taira201203_XENLA_stage_00079488	0.903512	4.89133	20.0276	7.63329e-06	0.00344855
NM_001088521.1	0.757318	4.21798	19.6845	9.13401e-06	0.00403684
NM_001087446.1	-1.17059	1.48573	19.6295	9.40053e-06	0.00406623
GM2A_Taira201203_XENLA_tissue_00009361	-1.9722	-0.79984	19.4555	1.02974e-05	0.00436136
NOS1_TeperekTkacz201202_XENLA_00156019	-2.73879	1.64477	19.3543	1.08572e-05	0.00450463
FAAH.3_Taira201203_XENLA_tissue_00095314	1.60604	2.22855	19.276	1.1312e-05	0.00459945
TSHB_Taira201203_XENLA_tissue_00012603	2.02332	0.955861	19.2251	1.16173e-05	0.00461559
NM_001092388.1	1.08003	2.60211	19.1944	1.18057e-05	0.00461559
NA_Quigley201112_XENLA_00000928	1.13988	6.12526	19.0325	1.28512e-05	0.00492954
SRSF7_Taira201203_XENLA_stage_00172411	0.586263	6.5086	18.8825	1.3902e-05	0.00515116
CD99L2_Taira201203_XENLA_stage_00140090	0.889137	3.42108	18.8779	1.39358e-05	0.00515116
X12500.1	2.0056	0.162291	18.7745	1.47122e-05	0.00534105
NM_001092858.1	1.08343	4.2563	18.7046	1.52615e-05	0.00544326
NA_Taira201203_XENLA_tissue_00003835	2.75086	-0.109333	18.6694	1.55458e-05	0.00544908
PCDH8L_Taira201203_XENLA_stage_00137150	0.86068	4.01913	18.6013	1.61107e-05	0.00555137
IP6K1_TC432191	1.13096	1.72582	18.5049	1.6947e-05	0.00574222
NM_001094584.1	3.72742	2.13481	18.4536	1.74093e-05	0.00580215
NM_001089661.1	-0.90474	4.42099	18.375	1.81419e-05	0.00592656
NA_TC437796	1.86782	1.00905	18.3517	1.83656e-05	0.00592656
BC123263.1	1.10738	1.90665	18.0421	2.16069e-05	0.00686358
NM_001087933.1	0.647405	4.89875	17.9756	2.23756e-05	0.00691952
EWSR1_Ismailoglu201203_XENLA_00034544	0.656257	4.77511	17.9404	2.27932e-05	0.00691952
RIPPLY2.2_XeXenL6RMv10005693m	0.959076	2.81379	17.9033	2.32415e-05	0.00691952
KDELR3_Taira201203_XENLA_tissue_00018163	-2.01663	0.537519	17.8874	2.34363e-05	0.00691952
TRIM45_Quigley201112_XENLA_00044809	1.03951	2.13277	17.8568	2.38167e-05	0.00691952
HSP90AA1.1_Park201106_XENLA_00156051	1.11691	3.2344	17.8342	2.41014e-05	0.00691952
POST_Horb201201_XENLA_00053330	1.78586	3.11247	17.8253	2.42143e-05	0.00691952
HOXB2_Taira201203_XENLA_stage_00184294	1.48184	0.11599	17.7772	2.48339e-05	0.00691952
AF183571.1	1.4141	2.02118	17.7763	2.48463e-05	0.00691952
TNR_Taira201203_XENLA_stage_00128584	-1.50145	0.439213	17.6801	2.61348e-05	0.00718001
DQ096929.1	-0.770928	4.2108	17.5673	2.77314e-05	0.00751706
CHKA_Taira201203_XENLA_stage_00086440	1.18624	1.01011	17.4939	2.8823e-05	0.00766167
NM_001095453.1	0.594349	7.3583	17.481	2.90186e-05	0.00766167
NA_Taira201203_XENLA_stage_00186971	1.48017	0.408886	17.4061	3.0186e-05	0.00782813
AY757358.1	0.822893	3.70296	17.3914	3.04192e-05	0.00782813
HOXA9_Taira201203_XENLA_stage_00171901	1.38514	0.655125	17.3613	3.09051e-05	0.00785377
MRPL44_Taira201203_XENLA_stage_00197843	1.93307	0.768683	17.2676	3.24668e-05	0.00814876
ACAA2_Taira201203_XENLA_stage_00070760	-0.876882	5.31019	17.2416	3.29147e-05	0.00816045
NM_001085641.1	1.39512	0.465783	17.0464	3.64776e-05	0.00893481
NA_Chung201110_XENLA_00075603	1.32471	0.930203	16.979	3.77949e-05	0.00914727
NP_001191176.1_XeXenL6RMv10043631m	1.20018	0.925592	16.9557	3.82613e-05	0.00915121
PARP12_Taira201203_XENLA_tissue_00255912	3.66268	1.74585	16.7311	4.307e-05	0.0101816
MTTP.2_Taira201203_XENLA_tissue_00157541	1.71903	0.919735	16.6529	4.48817e-05	0.0104879
BCR_Taira201203_XENLA_stage_00156432	1.07686	2.80509	16.5746	4.67725e-05	0.0108055
NA_Quigley201207_XENLA_00024742	0.924093	3.49347	16.5363	4.7728e-05	0.0109024
SIX3_Park201106_XENLA_00096689	1.02776	1.75685	16.4431	5.01314e-05	0.0113241
NM_001096094.1	1.66232	-0.203013	16.3365	5.3032e-05	0.0118477
ANKRD13C_XeXenL6RMv10025119m	-0.778754	4.59672	16.1917	5.72447e-05	0.0126498
DDX17_TeperekTkacz201206_XENLA_00093339	0.723122	4.77675	16.0481	6.1755e-05	0.0134998
SLC30A3_TeperekTkacz201202_XENLA_00068393	0.795289	3.22896	15.9643	6.45475e-05	0.0139601
BC097658.1	0.885227	3.94017	15.931	6.56936e-05	0.0139838
NA_XeXenL6RMv10021379m	0.686027	7.19339	15.9213	6.60326e-05	0.0139838
ATG4C_mgEST_Xl4jul2012_1013254253	-0.569798	6.50826	15.8987	6.68256e-05	0.0140058
FAM198A_Audic201207_XENLA_00001937	1.20896	0.57142	15.852	6.84956e-05	0.0142094
HEBP1_Taira201203_XENLA_tissue_00160319	-2.12845	2.90099	15.7751	7.13339e-05	0.0146487
SLC41A1_Taira201203_XENLA_stage_00170072	1.09088	3.0475	15.695	7.44189e-05	0.0150021
NM_001095695.1	0.777533	3.30735	15.6886	7.46719e-05	0.0150021
BC157491.1	0.709106	5.81209	15.6736	7.52689e-05	0.0150021
DBR1_Kwon201107_XENLA_00112625	-0.729919	8.23977	15.6414	7.65609e-05	0.0151115
BC094137.1	-0.525429	6.19225	15.6172	7.75458e-05	0.0151587
AXL_Kwon201107_XENLA_00055400	1.34687	1.75089	15.5382	8.08532e-05	0.0156547
NA_XeXenL6RMv10040324m	-1.11023	1.66038	15.4985	8.25722e-05	0.0158367
POST_XeXenL6RMv10029460m	0.66369	8.86307	15.3193	9.0782e-05	0.0172198
PCDH7_Taira201203_XENLA_tissue_00170267	0.864427	2.51816	15.2984	9.17929e-05	0.0172198
HMOX1_Park201106_XENLA_00018974	0.600601	5.96445	15.2692	9.32239e-05	0.0172198
PAT_Taira201203_XENLA_stage_00105302	0.747739	5.12284	15.2595	9.37057e-05	0.0172198
COTL1_Taira201203_XENLA_stage_00169294	0.812161	5.15072	15.2532	9.40183e-05	0.0172198
ITGA3_Kwon201107_XENLA_00042839	0.700263	5.33255	15.1448	9.95712e-05	0.0179321
BC153810.1	2.14292	1.30678	15.1429	9.96718e-05	0.0179321
NP_001119968.1_Taira201203_XENLA_tissue_00115462	-0.648961	4.8319	15.0772	0.000103201	0.0184041
ACAT2_Ismailoglu201203_XENLA_00020582	-0.724521	6.22468	15.0498	0.000104712	0.0184897
NM_001096671.1	0.911357	2.96054	15.0208	0.000106333	0.0184897
CPZ_Park201106_XENLA_00106163	0.887977	2.40366	15.0195	0.000106409	0.0184897
NA_Taira201203_XENLA_stage_00178519	0.99457	1.56245	14.9686	0.000109312	0.0188332
PCDH7_XeXenL6RMv10014053m	0.911886	3.26824	14.9066	0.000112969	0.0192984
NM_001085976.1	2.50113	-0.923542	14.8909	0.000113911	0.0192984
DQ096896.1	0.69392	4.37788	14.8601	0.000115789	0.0194545
NM_001114812.1	-0.727354	5.94368	14.8383	0.000117133	0.019477
RASAL1_Quigley201207_XENLA_00012499	0.823897	3.97405	14.827	0.000117839	0.019477
NM_001114806.1	1.6593	-0.0217187	14.8085	0.000118997	0.0195098
NA_Ismailoglu201203_XENLA_00047141	0.661756	4.93684	14.7611	0.000122028	0.0198466
LRRN1_Quigley201207_XENLA_00097977	0.487955	6.34726	14.6658	0.000128352	0.0206727
NM_001090259.1	0.978849	2.38063	14.6355	0.000130434	0.0206727
NA_Taira201203_XENLA_tissue_00097709	0.801931	4.31043	14.6273	0.000131004	0.0206727
NAALAD2_XeXenL6RMv10010887m	0.754154	6.69838	14.6238	0.000131247	0.0206727
HOXB1_Horb201201_XENLA_00014344	1.23277	0.799601	14.6103	0.000132192	0.0206727
NM_001092998.1	0.847815	3.52113	14.5845	0.00013401	0.0207972
SLC20A1_Taira201203_XENLA_tissue_00070846	1.10124	1.54936	14.5134	0.000139163	0.0214332
KIAA1324_Taira201203_XENLA_tissue_00148244	0.872179	4.70636	14.4427	0.000144488	0.022086
XB-GENE-5947742_Horb201201_XENLA_00046390	1.12753	4.60617	14.4259	0.000145785	0.022118
MMEL1_XeXenL6RMv10018155m	0.974047	1.35526	14.3613	0.000150868	0.0224497
TCF24_Taira201203_XENLA_stage_00095200	-1.41902	0.0384064	14.3556	0.000151329	0.0224497
NM_001114811.1	0.485234	7.27155	14.3413	0.000152482	0.0224497
HESX1_TC423712	0.867553	3.07278	14.3396	0.00015262	0.0224497
LAMP1_TC418059	-0.712949	5.71954	14.3186	0.000154335	0.0224497
PKDCC.2_Ismailoglu201203_XENLA_00003533	0.588891	5.00797	14.3154	0.000154597	0.0224497
NM_001094232.1	0.871115	3.19598	14.1522	0.000168596	0.0241405
USPL1_Ismailoglu201203_XENLA_00068688	0.819546	3.57928	14.152	0.000168616	0.0241405
HOXC9_Taira201203_XENLA_stage_00139999	2.07798	-1.29922	14.1235	0.000171194	0.0243383
AF081350.1	-0.556389	6.43046	14.0853	0.000174705	0.024665
CYP27B1_XeXenL6RMv10004453m	-1.30216	0.148515	14.0271	0.000180192	0.0252642
C6.2_Taira201203_XENLA_tissue_00109770	1.38559	0.776666	14.0025	0.000182565	0.0254215
NM_001086070.1	-1.28729	0.605987	13.913	0.00019147	0.0264802
VSTM2B_Taira201203_XENLA_stage_00174283	1.93938	-0.797039	13.7711	0.000206484	0.0283636
NA_Taira201203_XENLA_stage_00029747	0.733621	5.67499	13.7551	0.000208258	0.0284153
SLC35D1_Taira201203_XENLA_stage_00058290	0.547226	7.32431	13.7371	0.000210264	0.0284978
POST_XeXenL6RMv10008609m	0.653142	8.10482	13.6993	0.000214538	0.0287173
F6TKY1_XENTR_Chung201110_XENLA_00054761	1.33288	0.798755	13.6978	0.000214709	0.0287173
NM_001095136.1	-0.840257	4.6596	13.6135	0.000224565	0.0298393
GALNT12_Taira201203_XENLA_tissue_00275548	0.924807	3.40096	13.5804	0.000228559	0.0301727
ADHFE1_Horb201201_XENLA_00167266	1.27914	2.13588	13.5366	0.000233952	0.0303418
HOXB1_XeXenL6RMv10046410m	1.20041	0.389965	13.5345	0.000234222	0.0303418
NM_001086905.1	-1.62092	1.12711	13.5279	0.000235042	0.0303418
REV1_Taira201203_XENLA_stage_00190129	-0.702531	6.47105	13.5218	0.00023581	0.0303418
KRT_TC431575	0.847384	2.56595	13.5092	0.000237399	0.0303543
TNR_XeXenL6RMv10000569m	-1.45311	0.495569	13.4796	0.000241177	0.0306446
NM_001094798.1	2.93838	3.74972	13.4011	0.000251483	0.0317555
TBX1_TC416295	0.764489	3.35333	13.3533	0.000257966	0.0323731
NA_Taira201203_XENLA_stage_00140315	1.02286	2.34091	13.34	0.000259805	0.0324039
CTNNA2_Taira201203_XENLA_tissue_00186435	1.02886	1.36692	13.3209	0.00026246	0.0325355
CCDC88A_Kwon201107_XENLA_00116102	-0.681292	4.806	13.2947	0.000266152	0.0327482
NOS1_XeXenL6RMv10021848m	-1.38288	0.973555	13.286	0.000267398	0.0327482
FRZB2_Ismailoglu201203_XENLA_00013289	0.635351	3.95789	13.2682	0.000269948	0.0328626
MGC69520_Kwon201107_XENLA_00032652	0.545734	6.70783	13.2268	0.000275971	0.0333521
KLB_Taira201203_XENLA_tissue_00033520	0.779177	3.73133	13.2015	0.000279726	0.0333521
SLC38A8_Taira201203_XENLA_stage_00079345	0.629918	4.37562	13.2004	0.000279886	0.0333521
GJB2_Taira201203_XENLA_stage_00124664	0.550054	8.08484	13.1961	0.000280532	0.0333521
DCK.2_Taira201203_XENLA_tissue_00198050	0.62	5.02782	13.1772	0.000283381	0.0334581
HOXB3_Taira201203_XENLA_tissue_00054741	0.672977	4.18954	13.1684	0.000284714	0.0334581
TBX2_Chung201110_XENLA_00027864	0.503309	5.23924	13.0557	0.00030236	0.0353275
USP10_XeXenL6RMv10042948m	1.26806	0.282011	13.0281	0.000306854	0.0356477
SLC25A46_Taira201203_XENLA_tissue_00029815	-0.891048	3.16242	12.9525	0.000319496	0.0366253
NM_001091920.1	-0.478802	8.46504	12.9468	0.000320469	0.0366253
PCDH18_Taira201203_XENLA_tissue_00163321	0.528171	4.77915	12.9456	0.000320674	0.0366253
C14ORF43_Taira201203_XENLA_stage_00192349	0.816402	3.21338	12.8933	0.000329757	0.0368845
TNRC18_Taira201203_XENLA_stage_00183869	-0.559981	6.98109	12.8763	0.000332762	0.0368845
POST_Ismailoglu201203_XENLA_00073030	0.629398	6.24469	12.8743	0.000333116	0.0368845
NA_XeXenL6RMv10007752m	-1.3431	-0.155475	12.87	0.000333887	0.0368845
NR5A2_Taira201203_XENLA_stage_00192953	1.90831	-0.269727	12.8618	0.00033536	0.0368845
NM_001092867.1	0.796486	3.26904	12.8585	0.000335949	0.0368845
NA_Taira201203_XENLA_tissue_00252873	1.00847	2.23545	12.8554	0.000336501	0.0368845
RNF123_XeXenL6RMv10007926m	-0.673272	5.76964	12.8501	0.000337457	0.0368845
FP016230.1_TeperekTkacz201206_XENLA_00034949	1.79973	0.784634	12.8194	0.000343038	0.0372939
ZCCHC6_XeXenL6RMv10025807m	-0.567245	7.45013	12.7768	0.000350951	0.0376707
NM_001086372.1	0.843445	4.30642	12.7719	0.000351864	0.0376707
NA_Taira201203_XENLA_tissue_00139627	1.25535	1.06995	12.7603	0.00035405	0.0376707
GTF3C5_Taira201203_XENLA_tissue_00043880	0.890374	2.54705	12.7518	0.000355662	0.0376707
SGSM1_Kwon201107_XENLA_00052025	1.33779	2.41405	12.7513	0.000355769	0.0376707
XK81A1_Taira201203_XENLA_stage_00051119	1.26837	1.44802	12.7199	0.000361787	0.037973
X12499.1	1.51161	0.174944	12.7169	0.000362359	0.037973
USP25_TeperekTkacz201206_XENLA_00003524	-0.7589	4.22854	12.6405	0.000377473	0.039354
BC094262.1	-0.81512	4.93606	12.6307	0.000379459	0.0393592
TCIRG1_Taira201203_XENLA_stage_00041474	-0.829969	4.31368	12.5825	0.000389366	0.0401122
XPO6_Taira201203_XENLA_stage_00158057	-0.666126	6.3851	12.5763	0.000390665	0.0401122
WFDC2_Taira201203_XENLA_stage_00126744	1.00917	2.29467	12.5494	0.000396332	0.0403647
NM_001174043.1	1.06988	2.34652	12.5458	0.000397095	0.0403647
USP25_TeperekTkacz201206_XENLA_00055534	-0.642911	4.89169	12.4932	0.000408437	0.0413111
SYTL5_Taira201203_XENLA_tissue_00190281	0.864587	2.20764	12.4708	0.000413361	0.0416021
NP_001120584.1_Taira201203_XENLA_tissue_00099295	-1.6858	3.63696	12.4481	0.000418421	0.0418774
DDX5_Quigley201207_XENLA_00036650	0.717398	3.87952	12.4401	0.000420216	0.0418774
NA_Ismailoglu201203_XENLA_00057616	-1.00002	3.32101	12.4292	0.000422681	0.0419176
PDP2_Taira201203_XENLA_stage_00022351	1.57143	2.78974	12.3995	0.000429455	0.0423826
NM_001087123.1	0.802878	2.90409	12.3825	0.000433382	0.0425635
CA7_TeperekTkacz201202_XENLA_00075957	0.778796	5.05415	12.3381	0.00044381	0.0433781
NA_XeXenL6RMv10040162m	-1.25252	1.02659	12.279	0.000458072	0.0444309
HMX3_TC421895	1.09727	0.262385	12.2718	0.000459855	0.0444309
MEOX2_Taira201203_XENLA_stage_00205901	0.874495	3.14981	12.2666	0.000461137	0.0444309
ROBO3_Taira201203_XENLA_tissue_00093443	0.68914	4.89061	12.2335	0.000469403	0.045014
NA_Taira201203_XENLA_tissue_00267341	0.635928	4.0707	12.2198	0.000472857	0.0450358
AF244546.1	-0.496216	8.56656	12.215	0.000474061	0.0450358
CENPJ_Taira201203_XENLA_tissue_00078731	0.533318	4.84309	12.1912	0.000480158	0.0454029
NA_Quigley201207_XENLA_00021128	0.615298	4.76562	12.1626	0.000487564	0.0458897
NP_001120074.1_Taira201203_XENLA_tissue_00185579	-1.95789	2.03011	12.1534	0.000489988	0.0459053
42SP50_Taira201203_XENLA_tissue_00108571	-0.537331	5.46598	12.1334	0.000495268	0.0461871
CDC20B_Quigley201207_XENLA_00092219	1.53655	-0.354861	12.1247	0.000497585	0.0461913
NM_001085833.1	0.959574	2.61852	12.0992	0.000504423	0.0466133
COL12A1_XeXenL6RMv10048432m	-1.06402	1.47659	12.07	0.000512409	0.047137
CAPN8_TeperekTkacz201206_XENLA_00036923	0.695728	4.59551	12.0463	0.000518953	0.0474495
BC076870.1	-0.975858	2.59055	12.0408	0.000520475	0.0474495
FAM38A_Taira201203_XENLA_tissue_00010078	2.18426	3.86382	12.0027	0.000531241	0.0482149
MN1_Ismailoglu201203_XENLA_00041117	0.492695	8.04599	11.9889	0.000535185	0.0483569
CRMP1_Ismailoglu201203_XENLA_00005000	1.1107	1.36688	11.9594	0.000543723	0.048911
NM_001086408.1	0.825965	2.15771	11.9421	0.000548786	0.049149

## Sheet: Kdm6b-sperm
gene_id	logFC	logCPM	LR	PValue	FDR
NM_001174043.1	2.60184	2.83416	180.929	3.03874e-41	6.21361e-37
HOXC5_Taira201203_XENLA_stage_00151302	2.41587	3.26324	151.536	8.00331e-35	8.18258e-31
HOXB3_Taira201203_XENLA_tissue_00054741	1.5205	4.09109	86.3154	1.53406e-20	1.04562e-16
LHX2_TC414768	2.60778	1.17456	83.5888	6.0918e-20	3.11413e-16
HOXA9_Taira201203_XENLA_tissue_00152468	1.86875	2.2791	82.4089	1.10652e-19	4.52524e-16
NM_001127798.1	1.53966	3.30231	77.1254	1.60437e-18	5.46771e-15
NM_001174017.1	1.63615	3.06101	76.5699	2.12556e-18	6.20907e-15
TBX1_TC419427	1.43294	3.24593	75.465	3.7195e-18	9.34378e-15
NM_001173995.1	2.23471	1.93701	75.2666	4.11258e-18	9.34378e-15
TBX1_TC416295	1.3366	4.11855	74.4328	6.27371e-18	1.28285e-14
HOXA7_Taira201203_XENLA_stage_00116210	1.44	3.39812	70.2212	5.30126e-17	9.85456e-14
BC108834.1	0.758474	6.62979	68.9461	1.01191e-16	1.72429e-13
NM_001090259.1	1.37828	3.40963	64.529	9.5123e-16	1.49621e-12
NM_001089101.1	1.55889	5.23057	63.5621	1.55389e-15	2.26956e-12
NM_001094232.1	1.18046	3.31579	60.4536	7.53323e-15	1.02693e-11
NM_001096910.1	1.20441	3.24958	58.9844	1.58927e-14	2.03109e-11
NM_001086591.1	0.868238	6.10698	57.259	3.82029e-14	4.59513e-11
NM_001086489.1	1.5156	1.17733	55.6668	8.58576e-14	9.75342e-11
NM_001097687.1	2.47574	0.192904	53.7065	2.32796e-13	2.50538e-10
BMI1_Audic201207_XENLA_00000581	0.748625	5.07753	52.9015	3.50709e-13	3.58565e-10
ISL1_XeXenL6RMv10016290m	1.67094	1.22144	51.885	5.88492e-13	5.73023e-10
NP_001191176.1_XeXenL6RMv10043631m	1.50941	1.83757	51.6087	6.77395e-13	6.29608e-10
DMRT2_Taira201203_XENLA_tissue_00041735	1.44715	2.35821	50.9134	9.65314e-13	8.58206e-10
HOXC10_XeXenL6RMv10028294m	1.49614	1.91348	50.5438	1.16537e-12	9.92893e-10
X06592.1	1.73995	2.03422	49.5059	1.97775e-12	1.61764e-09
AF307009.1	1.31805	1.72371	48.4172	3.44538e-12	2.70966e-09
NA_Audic201207_XENLA_00007685	1.80531	1.26195	47.7849	4.75642e-12	3.60219e-09
BC080434.1	2.43693	-0.688173	47.6025	5.2203e-12	3.81231e-09
HAND2_Taira201203_XENLA_stage_00151811	1.67477	0.380073	47.488	5.53412e-12	3.90212e-09
NM_001085883.1	0.981807	3.96255	45.206	1.77364e-11	1.20891e-08
GJB1_TC442449	0.941657	7.71926	43.0939	5.21737e-11	3.44145e-08
BC146639.1	0.732493	5.95987	42.954	5.60432e-11	3.58116e-08
NM_001085976.1	2.14208	0.618186	41.7687	1.02737e-10	6.36599e-08
NA_Taira201203_XENLA_stage_00178003	1.81991	0.966237	40.658	1.81345e-10	1.09063e-07
HOXB2_Taira201203_XENLA_stage_00184294	1.53906	1.36638	40.1545	2.34654e-10	1.37091e-07
FBN3_Taira201203_XENLA_tissue_00243978	1.05073	3.40101	38.1974	6.39376e-10	3.63166e-07
NA_Audic201207_XENLA_00000277	0.750966	9.0668	38.0969	6.73179e-10	3.72031e-07
OLFM4_Quigley201112_XENLA_00066091	0.979936	4.87366	37.6705	8.37633e-10	4.50735e-07
X07104.1	1.74519	0.200007	37.549	8.91463e-10	4.67401e-07
RASL11B_TeperekTkacz201206_XENLA_00026584	-0.618221	6.18569	37.4315	9.46795e-10	4.84002e-07
DMBX1_Ismailoglu201203_XENLA_00074083	1.23955	1.58703	36.6416	1.41967e-09	7.08036e-07
NM_001085853.1	1.13701	1.3573	36.1171	1.85807e-09	9.0444e-07
NM_001096890.1	1.86557	-0.143088	36.0716	1.90194e-09	9.0444e-07
C8G_Taira201203_XENLA_stage_00104479	0.750254	3.74788	35.4179	2.66033e-09	1.21494e-06
NM_001095525.1	1.01404	4.74173	35.4081	2.67373e-09	1.21494e-06
SP9_Taira201203_XENLA_tissue_00169645	1.43601	1.4342	35.0048	3.28895e-09	1.44384e-06
HNF4A_XeXenL6RMv10008140m	1.12881	1.75239	34.9873	3.31869e-09	1.44384e-06
NM_001114811.1	0.591839	7.60956	34.6875	3.87113e-09	1.62539e-06
FLNC_Taira201203_XENLA_stage_00125455	1.13241	2.92378	34.6755	3.89496e-09	1.62539e-06
PKDCC.2_Quigley201112_XENLA_00017357	0.686501	5.35388	34.3585	4.58398e-09	1.87467e-06
BC157412.1	1.58876	0.947951	34.1928	4.99122e-09	2.00119e-06
HOXD3_Taira201203_XENLA_tissue_00245209	1.86769	0.182923	34.0491	5.37385e-09	2.11316e-06
XB-GENE-5947742_Horb201201_XENLA_00046390	0.886689	5.17285	33.9601	5.62536e-09	2.17033e-06
NM_001085987.1	0.90193	7.07826	33.7859	6.15234e-09	2.32968e-06
POST_Ismailoglu201203_XENLA_00073030	0.537237	6.84942	33.6956	6.4445e-09	2.36926e-06
IGF2_TC421105	0.94035	2.41245	33.6824	6.48858e-09	2.36926e-06
PITX1_Taira201203_XENLA_stage_00120477	2.01247	0.780705	33.577	6.84992e-09	2.45732e-06
ATP2A1_XeXenL6RMv10002631m	1.21632	2.98929	33.4903	7.1619e-09	2.52494e-06
CYP1A1_Taira201203_XENLA_tissue_00087286	0.866838	2.98209	33.3873	7.55172e-09	2.61725e-06
NM_001172195.1	1.43438	0.795846	33.2006	8.31268e-09	2.83296e-06
L25856.1	0.87573	4.57244	32.7192	1.06481e-08	3.52733e-06
HNF1B_TC445330	0.769498	4.68252	32.7106	1.06951e-08	3.52733e-06
NM_001085641.1	1.16525	2.16762	32.671	1.09155e-08	3.54285e-06
TMEM116_Taira201203_XENLA_stage_00214836	0.877423	3.42915	32.5216	1.17877e-08	3.71175e-06
NM_001086520.1	0.738249	4.9761	32.5197	1.17989e-08	3.71175e-06
CFI_Audic201207_XENLA_00002220	1.26027	2.46624	32.3723	1.27287e-08	3.93048e-06
BC077463.1	1.50878	1.02151	32.3496	1.28786e-08	3.93048e-06
RPE65_TC416487	0.545472	6.33707	32.3123	1.31279e-08	3.94763e-06
NP_001120268.1_Taira201203_XENLA_stage_00003849	0.91927	4.20392	32.2508	1.35505e-08	4.01565e-06
LAMB1_Taira201203_XENLA_stage_00035701	0.592262	7.45296	31.219	2.30498e-08	6.73317e-06
NP_001106453.1_Quigley201112_XENLA_00047809	0.701718	5.42545	30.8263	2.82192e-08	8.12714e-06
CNTN1_Taira201203_XENLA_tissue_00134660	0.694607	4.3557	30.6683	3.0612e-08	8.69381e-06
SST_Amin201106_XENLA_00067252	0.990068	2.40198	29.7081	5.02256e-08	1.39744e-05
POST_XeXenL6RMv10008609m	0.485329	8.70398	29.6939	5.05928e-08	1.39744e-05
NA_Taira201203_XENLA_stage_00053260	0.76249	3.09413	29.6687	5.1256e-08	1.39744e-05
BC068764.1	-0.644892	5.95934	29.6207	5.25418e-08	1.41365e-05
AJ000667.1	2.74062	-1.22719	29.5765	5.37528e-08	1.42745e-05
HOXA3_Amin201106_XENLA_00022950	2.04534	-0.279657	29.15	6.69872e-08	1.74862e-05
AF179300.1	2.06586	0.114695	29.1335	6.75573e-08	1.74862e-05
BC073479.1	1.20752	1.9253	29.0835	6.93239e-08	1.77192e-05
DMRTA2_Taira201203_XENLA_tissue_00288329	1.25899	0.770674	28.9661	7.36552e-08	1.84948e-05
NKX2-4_Taira201203_XENLA_stage_00094853	1.60501	0.0556855	28.9527	7.41674e-08	1.84948e-05
NM_001094589.1	-0.448653	7.11772	28.7451	8.25604e-08	2.03397e-05
MSX2_Taira201203_XENLA_tissue_00227253	0.48687	6.89212	28.6309	8.75729e-08	2.13177e-05
KIF26A_Audic201207_XENLA_00001762	0.57571	5.8585	28.5995	8.90042e-08	2.14113e-05
U82541.1	1.75454	1.6008	28.4618	9.55636e-08	2.27219e-05
AF544021.1	1.03923	2.67363	28.2028	1.09245e-07	2.56763e-05
X12499.1	1.44257	0.903802	28.0797	1.16419e-07	2.70516e-05
C3_XeXenL6RMv10012282m	0.673497	4.20648	27.9776	1.22726e-07	2.81965e-05
AIM1_Taira201203_XENLA_tissue_00176210	0.485791	6.26053	27.8145	1.33521e-07	3.02253e-05
NM_001092858.1	0.846985	2.79195	27.8002	1.34512e-07	3.02253e-05
SOX1_Taira201203_XENLA_tissue_00258099	1.13023	0.723199	27.6979	1.41818e-07	3.13944e-05
FOXD2_Ismailoglu201203_XENLA_00073355	1.3686	0.180554	27.6753	1.43481e-07	3.13944e-05
HOXA1_Taira201203_XENLA_stage_00188200	0.743172	4.6019	27.6612	1.4453e-07	3.13944e-05
NM_001095453.1	0.516486	8.05764	27.6436	1.45856e-07	3.13944e-05
HOXA9_Taira201203_XENLA_stage_00171901	1.31987	1.22028	27.4805	1.58691e-07	3.38011e-05
CAPN8_TeperekTkacz201206_XENLA_00036923	0.624116	5.03516	26.9084	2.13331e-07	4.49711e-05
C1ORF187_Taira201203_XENLA_stage_00079488	0.611626	4.48836	26.8509	2.19777e-07	4.58571e-05
HOXA3_Taira201203_XENLA_tissue_00008541	2.06362	-0.333701	26.7314	2.3379e-07	4.82882e-05
LPAR6_TeperekTkacz201206_XENLA_00019771	-0.663826	3.95826	26.6478	2.44123e-07	4.99182e-05
MYL1_Taira201203_XENLA_stage_00169760	1.03064	2.7443	26.5605	2.55415e-07	5.17103e-05
CAPN13_Taira201203_XENLA_stage_00116462	0.79865	4.04019	26.5254	2.60101e-07	5.21425e-05
HOXA2_Taira201203_XENLA_stage_00097090	1.09874	1.3612	26.4763	2.66797e-07	5.27469e-05
AG1_Quigley201207_XENLA_00029258	0.620838	7.3342	26.4656	2.68275e-07	5.27469e-05
AF173940.1	0.592856	5.27088	26.2425	3.01123e-07	5.86416e-05
HMX3_TC421895	1.10864	0.935234	25.9247	3.54997e-07	6.84809e-05
HOXB3_Taira201203_XENLA_tissue_00199386	0.95187	1.81658	25.8309	3.72682e-07	7.12207e-05
CRABP2_Taira201203_XENLA_tissue_00241645	0.501663	5.88178	25.6961	3.99631e-07	7.56634e-05
NA_Quigley201112_XENLA_00030355	0.768402	2.70924	25.6009	4.19839e-07	7.87603e-05
NM_001088367.1	0.779165	4.99711	25.5081	4.40519e-07	8.0731e-05
NM_001087019.1	1.91476	-1.09449	25.503	4.417e-07	8.0731e-05
FOXG1_Taira201203_XENLA_stage_00055345	1.36318	-0.122677	25.4839	4.46099e-07	8.0731e-05
POST_XeXenL6RMv10029460m	0.470649	9.41347	25.4837	4.46137e-07	8.0731e-05
BC123263.1	0.901493	2.42787	25.41	4.635e-07	8.31372e-05
CKMT1B_Taira201203_XENLA_stage_00069915	0.536868	4.98939	25.3767	4.71569e-07	8.3849e-05
NA_Taira201203_XENLA_stage_00086139	0.708724	3.77988	25.2754	4.97001e-07	8.76093e-05
NM_001096464.1	1.26994	2.87739	25.1418	5.32647e-07	9.26333e-05
PLOD2_Taira201203_XENLA_tissue_00074828	0.653923	7.12751	25.1349	5.34562e-07	9.26333e-05
NP_001165092.1_TeperekTkacz201202_XENLA_00006404	0.883288	2.58675	24.9548	5.869e-07	0.000100848
NM_001097706.1	1.56132	0.193104	24.7852	6.40884e-07	0.000109207
BC157495.1	-0.559009	7.57665	24.7167	6.64055e-07	0.00011222
DARMIN_TeperekTkacz201206_XENLA_00081109	0.559351	5.91391	24.4959	7.44687e-07	0.000124814
NA_mgEST_Xl4jul2012_1013104196	1.46307	1.75308	24.2012	8.67788e-07	0.000144264
FBN3_Audic201207_XENLA_00005397	0.561023	5.57315	24.1746	8.79867e-07	0.000145093
F6QT75_XENTR_Taira201203_XENLA_stage_00119280	1.19809	2.66428	24.0656	9.31101e-07	0.000152313
NA_XeXenL6RMv10006000m	0.569704	4.6871	23.7524	1.09556e-06	0.000175929
HOXB1_Horb201201_XENLA_00014344	1.28477	1.97893	23.7428	1.10106e-06	0.000175929
XB-GENE-5822220_Taira201203_XENLA_stage_00051798	1.08464	1.85077	23.7424	1.10128e-06	0.000175929
NFE2L1_Ismailoglu201203_XENLA_00045791	0.47538	6.46788	23.3966	1.31812e-06	0.000208938
ACAA2_TeperekTkacz201206_XENLA_00121195	0.517567	5.45256	23.1831	1.47286e-06	0.000231669
NM_001088725.1	1.35744	2.76723	23.1494	1.49888e-06	0.000233962
NM_001095452.1	0.538845	7.24144	23.0644	1.56668e-06	0.000241033
MEIS2_Taira201203_XENLA_tissue_00019568	0.852887	1.65142	23.0488	1.57943e-06	0.000241033
AGRN_Taira201203_XENLA_tissue_00124619	0.54399	4.43467	23.0486	1.57954e-06	0.000241033
NM_001087226.1	0.863077	3.80554	22.9561	1.65746e-06	0.00025105
OLIG3_Taira201203_XENLA_stage_00040164	0.694438	3.1933	22.9045	1.70249e-06	0.000255974
SEMA6A_Park201106_XENLA_00093441	0.570098	4.94795	22.7234	1.87078e-06	0.000279224
STOX1_Ismailoglu201203_XENLA_00040261	-0.562193	5.7295	22.6521	1.94143e-06	0.000287669
NM_001090041.1	-1.22091	1.46598	22.5689	2.02741e-06	0.000298247
NP_001090730.1_Horb201201_XENLA_00189873	1.4479	0.457094	22.5442	2.05361e-06	0.000299684
ANXA10_Taira201203_XENLA_stage_00029369	1.56001	-0.450328	22.5322	2.06648e-06	0.000299684
AHNAK_TC443234	1.09139	1.70296	22.459	2.14683e-06	0.000309143
METRNL_XeXenL6RMv10007950m	0.576917	3.80896	22.4333	2.17563e-06	0.0003111
NM_001087235.1	0.576189	3.92997	22.1094	2.57549e-06	0.000365719
LAMA1_Amin201106_XENLA_00003444	0.573926	5.19107	22.0718	2.62634e-06	0.000370369
TBX16_Taira201203_XENLA_stage_00168162	0.625847	4.10061	21.9277	2.83124e-06	0.000396528
DES.1_Taira201203_XENLA_tissue_00277792	1.68401	-0.0923876	21.8504	2.9476e-06	0.000410017
C8G_Taira201203_XENLA_tissue_00277605	0.610893	3.9769	21.6134	3.33511e-06	0.000460786
SIX1_Park201106_XENLA_00054677	0.687501	3.79094	21.4123	3.70381e-06	0.000508292
PALMD_Horb201201_XENLA_00012377	1.70336	-0.658911	21.3674	3.79161e-06	0.000516872
TOX2_Amin201106_XENLA_00005386	1.0845	0.629114	21.3268	3.87272e-06	0.000524433
HOXB1_XeXenL6RMv10046410m	1.06574	1.38828	21.2237	4.08689e-06	0.000549794
EN1_Taira201203_XENLA_stage_00166115	1.46408	1.38739	21.207	4.12249e-06	0.000550958
HOXC9_Taira201203_XENLA_stage_00150562	1.51871	0.0418489	21.1627	4.21902e-06	0.000560198
BC128676.1	-1.35859	1.03091	21.1305	4.29051e-06	0.000566015
AJ009287.1	0.436671	6.95289	21.0857	4.39199e-06	0.000575688
BC170176.1	1.5532	-0.736363	20.8194	5.04697e-06	0.000655541
NM_001085901.1	1.43947	0.0394937	20.8124	5.06531e-06	0.000655541
NM_001086340.1	0.452756	5.8605	20.7996	5.09932e-06	0.000655791
NA_TC447243	0.722226	2.54519	20.7706	5.17713e-06	0.000658173
DSTN_XeXenL6RMv10047143m	-1.42282	0.189814	20.7687	5.18221e-06	0.000658173
TCF15_XeXenL6RMv10007795m	2.07585	0.079793	20.7461	5.24388e-06	0.000661894
NM_001090141.1	0.666263	2.83889	20.6641	5.47314e-06	0.000686594
CYP26C1_Taira201203_XENLA_stage_00087131	0.785416	4.60485	20.6434	5.53287e-06	0.000689202
FAM26E_Taira201203_XENLA_tissue_00142771	1.00143	1.5478	20.6335	5.56134e-06	0.000689202
KLB_Taira201203_XENLA_tissue_00033520	0.578051	3.9334	20.6101	5.62981e-06	0.000691253
NA_TeperekTkacz201202_XENLA_00154778	0.382716	8.73706	20.6031	5.65032e-06	0.000691253
GLI2_Taira201203_XENLA_stage_00090717	0.458863	5.47094	20.5933	5.67931e-06	0.000691253
GJB2_Taira201203_XENLA_stage_00124664	0.578848	8.04286	20.5615	5.77468e-06	0.000698703
GATM_Amin201106_XENLA_00005624	0.363685	8.1782	20.4702	6.05666e-06	0.000728509
NA_TC450878	-0.43116	7.52539	20.2731	6.71383e-06	0.000798393
ADHFE1_Horb201201_XENLA_00167266	0.923469	1.85756	20.2678	6.73255e-06	0.000798393
BC073483.1	0.85172	2.01024	20.253	6.7846e-06	0.000798393
HOXC9_Taira201203_XENLA_stage_00139999	2.00615	-1.28771	20.2504	6.79384e-06	0.000798393
SLC18A3_XeXenL6RMv10013902m	1.50415	-0.278028	20.2252	6.88396e-06	0.000804361
SNAI2_TC419553	1.18501	0.192222	20.2081	6.9457e-06	0.000806964
HOXD3_XeXenL6RMv10027979m	1.94477	-0.841274	20.1763	7.0624e-06	0.000815887
NCAM1_Taira201203_XENLA_tissue_00250079	0.793411	3.29382	20.1497	7.16131e-06	0.000822666
NA_Taira201203_XENLA_stage_00140315	0.884116	3.02241	20.1373	7.20754e-06	0.000823351
SLC10A1_Taira201203_XENLA_stage_00126100	0.798486	1.9038	20.0844	7.41003e-06	0.000838438
NA_XeXenL6RMv10031635m	0.943144	2.73455	20.0814	7.42162e-06	0.000838438
PMP22_TC415619	0.598855	4.58905	20.035	7.60359e-06	0.000854275
NA_Taira201203_XENLA_tissue_00097709	0.480919	5.29325	20.0069	7.7165e-06	0.000862224
AGR2_Kwon201107_XENLA_00107901	0.935733	3.10575	19.8447	8.39975e-06	0.00092893
B3GNT7_Kwon201107_XENLA_00055505	0.54542	4.52317	19.8436	8.40434e-06	0.00092893
NM_001089872.1	1.15205	0.357233	19.7664	8.75067e-06	0.000962009
PCDH8_XeXenL6RMv10032431m	1.10896	0.189102	19.6786	9.16224e-06	0.000996955
ATP2A1_XeXenL6RMv10006291m	1.20486	1.4393	19.6778	9.16606e-06	0.000996955
IRX4_XeXenL6RMv10025281m	1.16201	0.471461	19.5518	9.79059e-06	0.00105925
MYL1_mgEST_Xl4jul2012_1013253981	1.97176	-0.585904	19.4959	1.00816e-05	0.00108499
ACSF2_Park201106_XENLA_00119376	0.470547	5.86578	19.4453	1.03522e-05	0.00110829
BC046739.1	1.13037	1.18714	19.4213	1.04833e-05	0.00111647
NM_001086382.1	0.615867	3.48306	19.4055	1.05703e-05	0.0011199
SOX8_Quigley201112_XENLA_00032759	0.579438	3.57611	19.3423	1.09262e-05	0.00115164
NM_001093566.1	0.514003	5.48956	19.285	1.12586e-05	0.00118059
HNF1B_XeXenL6RMv10047073m	0.646449	2.77779	19.2625	1.13924e-05	0.00118853
TBX20_Amin201106_XENLA_00028934	1.06718	1.48984	19.1561	1.20452e-05	0.00125026
RBFOX2_Taira201203_XENLA_stage_00061931	0.345156	7.70812	19.0876	1.24856e-05	0.00128691
NA_Audic201207_XENLA_00004537	0.416196	6.24286	19.0817	1.25242e-05	0.00128691
ALS2_Park201106_XENLA_00008804	0.526294	4.30963	19.0298	1.28694e-05	0.00131002
NM_001087789.1	1.28613	2.36903	19.0286	1.28772e-05	0.00131002
DMBX1_Taira201203_XENLA_stage_00105453	0.815586	2.90331	18.9971	1.3092e-05	0.00132528
NM_001088989.1	0.523032	4.95066	18.9646	1.33166e-05	0.00133415
SLITRK1_XeXenL6RMv10000813m	1.3874	0.108614	18.9571	1.33692e-05	0.00133415
NM_001086783.1	1.1024	1.55437	18.9562	1.33754e-05	0.00133415
AF183571.1	0.942816	3.30507	18.9249	1.35964e-05	0.00134961
BCR_Taira201203_XENLA_stage_00156432	0.597017	3.17221	18.9074	1.37222e-05	0.00135167
CAPN8_XeXenL6RMv10014207m	0.538714	5.20087	18.9036	1.37493e-05	0.00135167
NM_001086235.1	0.57324	4.19169	18.8433	1.41911e-05	0.00138842
PLEKHG4_Taira201203_XENLA_stage_00112026	0.440518	6.4055	18.7989	1.45253e-05	0.00141435
XB-GENE-979293_Park201106_XENLA_00106979	0.799504	2.29198	18.7886	1.4604e-05	0.00141528
NA_Taira201203_XENLA_stage_00000464	0.890887	1.30757	18.7586	1.48356e-05	0.00143094
TBR1_Taira201203_XENLA_stage_00074933	1.30656	-0.424668	18.4578	1.73708e-05	0.00166759
IL20RB_Taira201203_XENLA_tissue_00204348	0.634874	2.73229	18.3613	1.82732e-05	0.00174603
SLC38A8_Taira201203_XENLA_stage_00079345	0.562911	4.79486	18.3288	1.85878e-05	0.00176783
NA_Quigley201207_XENLA_00024742	0.543095	3.34612	18.3096	1.87757e-05	0.00177539
NA_Quigley201112_XENLA_00056189	0.577356	6.31987	18.303	1.8841e-05	0.00177539
NA_Horb201201_XENLA_00161253	0.89525	9.33975	18.2466	1.94071e-05	0.00182035
CFI_Taira201203_XENLA_tissue_00091106	1.2854	1.3123	18.2199	1.96817e-05	0.00183768
KNG1_TC419186	1.22432	0.378118	18.1918	1.99739e-05	0.00185648
NM_001086372.1	0.477485	4.45047	18.1266	2.0669e-05	0.0019124
AY757358.1	0.636868	4.18462	18.0904	2.10664e-05	0.00194038
GALNT12_Taira201203_XENLA_tissue_00275548	0.59697	3.80736	18.0564	2.14452e-05	0.00196642
NM_001087059.1	0.345907	7.28647	18.0058	2.20228e-05	0.00201037
HS3ST3A1_TC420639	0.503449	4.12268	17.9636	2.25167e-05	0.00204632
NM_001085657.1	0.636896	3.07552	17.8402	2.40255e-05	0.00217269
NM_001095674.1	0.832786	1.18776	17.8278	2.41824e-05	0.00217269
SLC38A3_Taira201203_XENLA_stage_00175037	0.920627	1.33487	17.8244	2.4226e-05	0.00217269
NA_Taira201203_XENLA_stage_00034511	0.520311	4.0713	17.8152	2.43428e-05	0.00217363
NFIL3_Quigley201207_XENLA_00114436	0.517389	4.01885	17.7951	2.46011e-05	0.00218394
SRSF5_XeXenL6RMv10044363m	0.708045	3.01022	17.7897	2.46718e-05	0.00218394
NM_001087933.1	0.547178	5.28054	17.7019	2.58364e-05	0.00227716
NM_001114806.1	0.931417	1.64333	17.6447	2.66252e-05	0.00233662
CRABP2_Taira201203_XENLA_stage_00159894	0.593759	3.91388	17.561	2.78233e-05	0.00243133
LRRN1_Quigley201207_XENLA_00097977	0.444076	5.45724	17.5388	2.815e-05	0.00244941
NM_001090793.1	0.642459	3.89336	17.521	2.84152e-05	0.00246201
NA_Audic201207_XENLA_00004453	1.0592	0.423908	17.4141	3.00583e-05	0.00259338
NM_001087625.1	-0.509714	5.70465	17.3871	3.04893e-05	0.00261952
NA_Horb201201_XENLA_00093761	1.00752	0.924454	17.3742	3.06966e-05	0.00262629
CCNB1_TC446757	-0.724541	4.53759	17.3662	3.08258e-05	0.00262636
RBM24_Taira201203_XENLA_stage_00000585	0.43484	5.82544	17.3334	3.13619e-05	0.00266095
AY188284.1	1.05916	1.34147	17.2963	3.19815e-05	0.00268667
COL4A5_Taira201203_XENLA_tissue_00253687	1.092	0.473674	17.295	3.20025e-05	0.00268667
GRASP_Taira201203_XENLA_tissue_00109197	-0.531726	4.97616	17.2917	3.20592e-05	0.00268667
NA_Taira201203_XENLA_stage_00162649	0.736012	2.95982	17.2646	3.25182e-05	0.00271401
PKDCC.2_Ismailoglu201203_XENLA_00003533	0.472887	5.45642	17.2395	3.29513e-05	0.00273898
RARRES1_TC417025	0.491357	3.83199	17.1632	3.43011e-05	0.00283963
SEMA6A_Audic201207_XENLA_00002860	0.450606	5.82742	17.0452	3.65008e-05	0.00300955
ATP2A1_TC446943	1.12254	1.7187	16.9805	3.77661e-05	0.00310137
ZEB2B_Taira201203_XENLA_tissue_00184396	0.848544	1.16357	16.858	4.02827e-05	0.00327336
BC108862.1	0.526523	3.34418	16.8526	4.03982e-05	0.00327336
SLC26A11_TeperekTkacz201202_XENLA_00049624	0.411672	7.83718	16.8494	4.04652e-05	0.00327336
ANPEP_Taira201203_XENLA_tissue_00278549	0.686	5.30092	16.8478	4.05007e-05	0.00327336
PRDM12_XeXenL6RMv10024233m	0.735042	2.02625	16.8007	4.15181e-05	0.00334237
DLX2_Park201106_XENLA_00042638	0.750592	2.06595	16.7583	4.2456e-05	0.00339692
NM_001085596.1	-1.04107	1.5302	16.7551	4.25279e-05	0.00339692
NT5M_Park201106_XENLA_00098058	-1.0998	1.5721	16.6957	4.38797e-05	0.00348283
SPARC_Taira201203_XENLA_stage_00148034	0.645387	3.30965	16.6929	4.39442e-05	0.00348283
BC085223.1	0.438338	4.82984	16.626	4.55216e-05	0.00358166
NM_001092803.1	0.661362	2.26024	16.6252	4.55414e-05	0.00358166
NA_Taira201203_XENLA_stage_00189979	0.558031	4.81321	16.6158	4.57685e-05	0.00358572
MMP1_Taira201203_XENLA_tissue_00097269	-2.89962	1.58946	16.4914	4.88709e-05	0.0038027
H1F0_XeXenL6RMv10046534m	0.616572	3.33494	16.4899	4.89099e-05	0.0038027
PCDH8L_Taira201203_XENLA_stage_00137150	0.555563	5.01862	16.4795	4.9178e-05	0.0038059
NA_Quigley201207_XENLA_00045881	0.958296	1.20036	16.4739	4.93234e-05	0.0038059
MFAP2_Amin201106_XENLA_00076701	0.827163	1.90711	16.3776	5.18957e-05	0.00398934
NA_XeXenL6RMv10035528m	1.05369	0.390096	16.3222	5.34341e-05	0.00409221
CCDC129_Taira201203_XENLA_stage_00048849	0.690856	4.67815	16.2955	5.41931e-05	0.00413485
NM_001086587.1	0.345713	8.24021	16.2737	5.48191e-05	0.00416707
NM_001127811.1	1.07291	0.82293	16.247	5.55966e-05	0.00421051
SNAP25_TC453199	1.46212	0.0636299	16.2252	5.62404e-05	0.00424356
SLC2A2_XeXenL6RMv10007677m	0.507302	3.79451	16.1298	5.91447e-05	0.00444629
C6.2_Taira201203_XENLA_tissue_00109770	0.810206	1.98616	16.0904	6.03885e-05	0.00452316
NA_TC437796	1.02777	1.36166	16.0788	6.076e-05	0.00453438
CPLX3_Taira201203_XENLA_stage_00007570	0.775425	1.41652	16.0343	6.22046e-05	0.0046253
SIX3_Park201106_XENLA_00096689	0.994087	2.91564	16.0028	6.32486e-05	0.00467536
NM_001096671.1	0.842801	3.55436	15.9972	6.34369e-05	0.00467536
AF157558.1	1.02509	1.27461	15.9934	6.35637e-05	0.00467536
SP7_Kwon201107_XENLA_00096283	0.421973	6.06538	15.9761	6.4147e-05	0.00470135
MTA1_TeperekTkacz201206_XENLA_00059175	0.388491	5.45143	15.9415	6.53314e-05	0.00477106
BC041298.1	0.693298	1.7286	15.9134	6.63071e-05	0.00482508
NAALAD2_XeXenL6RMv10010887m	0.348389	6.72676	15.883	6.73828e-05	0.00488597
HGF_Chung201110_XENLA_00038091	0.684452	2.6643	15.8431	6.8816e-05	0.00497226
CA14_Ismailoglu201203_XENLA_00030232	0.395509	6.96766	15.8291	6.93263e-05	0.0049915
NM_001086533.1	0.571272	3.06849	15.8099	7.0036e-05	0.0050249
NA_Taira201203_XENLA_stage_00178704	0.881669	1.3726	15.7836	7.10158e-05	0.00507738
NP_001005025.1_TC414446	1.06029	0.835962	15.7444	7.25021e-05	0.00516558
PTK2B_XeXenL6RMv10011980m	0.710217	4.19871	15.6754	7.51946e-05	0.00533882
NM_001127804.1	0.680438	5.4553	15.6666	7.55468e-05	0.00534526
NM_001087791.1	1.18871	0.290568	15.6202	7.74211e-05	0.00545899
EU124653.1	0.57164	3.00782	15.4909	8.29016e-05	0.00582533
CD99L2_Taira201203_XENLA_stage_00140090	0.535129	3.1116	15.4678	8.39236e-05	0.00587695
BMPR1B_XeXenL6RMv10018232m	0.678589	2.80109	15.4544	8.4519e-05	0.00589845
FBXO21_XeXenL6RMv10026830m	-0.711393	1.99463	15.4239	8.58971e-05	0.00595412
AF154558.1	1.38884	-0.0252664	15.4238	8.58991e-05	0.00595412
NM_001093988.1	-0.767136	1.82795	15.4006	8.6959e-05	0.00600722
SEPT12_Quigley201207_XENLA_00112768	0.505378	4.90639	15.3414	8.97303e-05	0.0061778
FAM83C_TeperekTkacz201206_XENLA_00117535	0.463047	4.77512	15.3341	9.00748e-05	0.0061807
NP_001090807.1_TC431746	1.07989	0.221115	15.2633	9.35158e-05	0.00639536
PITX2_XeXenL6RMv10006867m	0.889126	2.41011	15.2431	9.4521e-05	0.00642368
FAM83C_Taira201203_XENLA_tissue_00155652	0.720815	1.90168	15.2424	9.45583e-05	0.00642368
TGFBI_TC416956	1.05152	1.05312	15.2093	9.62308e-05	0.00650897
SOX9_Quigley201112_XENLA_00084848	0.446763	4.36443	15.2049	9.64505e-05	0.00650897
NCEH1_Taira201203_XENLA_tissue_00058155	0.370957	6.96335	15.1292	0.000100396	0.00675298
NM_001091660.1	0.62456	3.60367	15.1135	0.000101238	0.00678728
MYH6_TC451771	0.629191	1.98506	15.0886	0.000102579	0.0068547
NASP_Taira201203_XENLA_stage_00094750	-0.329559	6.83202	15.0814	0.000102972	0.00685854
NM_001094788.1	0.783047	3.05309	14.9994	0.000107543	0.00713974
NA_Taira201203_XENLA_stage_00054921	0.335254	8.15791	14.948	0.000110512	0.00731312
FRZB2_Ismailoglu201203_XENLA_00013289	0.476773	4.11276	14.9398	0.000110998	0.00732154
SLC34A2_Taira201203_XENLA_tissue_00095660	-0.594322	3.10614	14.8551	0.000116095	0.00763315
BC084959.1	0.399161	5.82126	14.8423	0.000116885	0.00766044
NM_001095580.1	0.821193	1.53572	14.8254	0.000117935	0.00770347
LRP4_XeXenL6RMv10039024m	0.627244	3.13429	14.8197	0.000118295	0.00770347
FBN2_mgEST_Xl4jul2012_1013115188	1.23054	-0.403343	14.7879	0.000120303	0.00780935
BIX1.2_TC420866	-0.495805	3.91617	14.732	0.000123923	0.00801891
AXIN2_Taira201203_XENLA_tissue_00022037	0.38705	6.2116	14.6618	0.000128627	0.00829706
STRN_Ismailoglu201203_XENLA_00003324	-0.362056	6.09548	14.648	0.000129572	0.00833171
HIC1_Taira201203_XENLA_tissue_00253600	0.587748	2.64638	14.5196	0.000138711	0.00889145
SLIT2_Audic201207_XENLA_00006792	0.904404	1.21618	14.5005	0.000140121	0.00895376
VDAC1_mgEST_Xl4jul2012_1013088450	0.343624	6.20776	14.4876	0.000141083	0.00898711
SLC30A3_TeperekTkacz201202_XENLA_00068393	0.555398	3.55824	14.4616	0.00014305	0.00908409
A7MC59_XENTR_XeXenL6RMv10023807m	0.355258	5.72667	14.4375	0.000144887	0.00917231
NA_Taira201203_XENLA_stage_00149180	0.996908	0.338631	14.409	0.000147097	0.00928343
NM_001086328.1	1.01155	0.15481	14.3728	0.000149953	0.0094346
KSR1_Taira201203_XENLA_tissue_00174851	0.604271	2.4079	14.3668	0.000150434	0.00943583
EFEMP2_Park201106_XENLA_00159971	0.699955	2.63665	14.3597	0.000151001	0.00944242
XB-GENE-5904724_Audic201207_XENLA_00000182	1.033	0.20396	14.342	0.000152428	0.00950262
NM_001095843.1	0.655524	2.1901	14.3047	0.000155478	0.0096357
MEIS1_Taira201203_XENLA_stage_00103676	0.636201	2.1813	14.3043	0.000155506	0.0096357
FAM115C_Taira201203_XENLA_stage_00208815	0.537727	4.39343	14.277	0.000157784	0.00974735
AY218797.1	-0.372688	6.42766	14.2607	0.000159155	0.00980241
FZD2_XeXenL6RMv10049483m	0.380992	6.13625	14.2279	0.000161955	0.00994489
ARID3C_mgEST_Xl4jul2012_1013118667	0.877476	1.0083	14.1837	0.000165797	0.0101492
HOXC13_XeXenL6RMv10037467m	0.883862	0.428202	14.1783	0.000166274	0.0101492
NM_001087765.1	0.399389	5.81488	14.1023	0.000173132	0.0105363
DQ096943.1	0.347888	8.15048	14.0821	0.000174998	0.0105875
ANXA2_TC439934	0.384806	5.51873	14.082	0.000175009	0.0105875
AJ009303.1	0.456369	4.46586	14.0613	0.000176948	0.0106616
NAALAD2_Taira201203_XENLA_stage_00046481	0.413061	5.06899	14.0521	0.000177812	0.0106616
OLIG2_XeXenL6RMv10027066m	0.989188	0.0648812	14.0518	0.000177845	0.0106616
NA_Taira201203_XENLA_tissue_00285949	-1.32843	2.6831	14.0468	0.000178319	0.0106616
HOXA4_XeXenL6RMv10034990m	1.51214	-1.06956	13.9874	0.000184039	0.0109715
TCF15_Horb201201_XENLA_00066251	0.822403	1.91999	13.979	0.00018486	0.0109884
ANGPT4_Taira201203_XENLA_stage_00132334	0.888146	3.31522	13.9522	0.000187518	0.0111141
PHLDB3_TeperekTkacz201206_XENLA_00130974	-0.359057	5.53564	13.9372	0.000189024	0.011171
CCNB1_Ismailoglu201203_XENLA_00062425	-0.621039	4.6331	13.9084	0.000191943	0.0113108
NM_001094489.1	0.486417	4.19108	13.8991	0.000192892	0.0113341
BC100177.1	-0.444963	5.17175	13.8877	0.000194064	0.0113474
NA_Chung201110_XENLA_00014361	0.745398	2.65098	13.8861	0.000194229	0.0113474
NM_001086198.1	0.405623	6.75246	13.8742	0.000195466	0.0113662
TAOK3_mgEST_Xl4jul2012_1013103670	-0.66227	2.13422	13.8723	0.000195663	0.0113662
NA_Taira201203_XENLA_stage_00122175	0.41015	5.99048	13.8642	0.000196507	0.011383
NA_Park201106_XENLA_00049550	0.443143	5.03802	13.7598	0.000207739	0.0119995
NRP1_Audic201207_XENLA_00005260	1.00049	0.197699	13.7396	0.000209979	0.0120948
NM_001096377.1	0.496758	6.95987	13.7322	0.000210806	0.0121083
WNT11_TC451108	0.528713	3.93657	13.7177	0.000212446	0.0121386
FGF16_Taira201203_XENLA_tissue_00055335	0.495309	3.95583	13.717	0.00021252	0.0121386
UGT8_Taira201203_XENLA_stage_00042356	0.537555	3.91896	13.6961	0.000214898	0.0122402
NM_001087833.1	0.363368	5.94213	13.6353	0.000221977	0.0126083
NM_001094778.1	-0.413396	6.92629	13.603	0.000225819	0.012791
AF154557.1	0.987713	2.04322	13.578	0.000228847	0.0129267
RECK_Taira201203_XENLA_stage_00034728	0.779132	1.19976	13.5504	0.000232248	0.0130685
LOC398404_Taira201203_XENLA_tissue_00192178	0.362317	5.83837	13.5472	0.000232636	0.0130685
SPARC_XeXenL6RMv10045016m	0.57461	2.82833	13.5299	0.000234792	0.0131535
KCNN1_Ismailoglu201203_XENLA_00007109	-0.860111	1.46118	13.4833	0.000240691	0.0134471
NA_Taira201203_XENLA_stage_00089175	0.56443	3.86576	13.458	0.000243959	0.0135926
NM_001094838.1	0.476925	4.13633	13.4365	0.000246771	0.0136618
NM_001095731.1	0.504871	4.5184	13.4334	0.000247186	0.0136618
NA_Taira201203_XENLA_stage_00000768	0.456855	4.24925	13.4332	0.000247206	0.0136618
NA_XeXenL6RMv10015172m	0.523778	3.53736	13.3973	0.000251992	0.0138888
PALM_Park201106_XENLA_00093966	0.400156	5.11613	13.3823	0.000254008	0.0139622
EVX1_TeperekTkacz201202_XENLA_00087137	0.52797	5.30088	13.3639	0.000256508	0.0140619
BC079821.1	-0.367174	9.75299	13.3568	0.00025749	0.014078
LRRC34_TC421126	1.11173	0.00362371	13.3222	0.000262281	0.0143016
ANKS6_Taira201203_XENLA_tissue_00170669	0.637586	2.57003	13.3125	0.000263643	0.0143377
ETS2_Kwon201107_XENLA_00005674	-0.351593	6.52387	13.297	0.000265831	0.0144038
RDH10_Taira201203_XENLA_stage_00175170	-0.528428	2.82625	13.2939	0.000266268	0.0144038
COMT.2_Taira201203_XENLA_stage_00100006	0.402844	4.99824	13.2868	0.000267284	0.0144206
ATP11C_Taira201203_XENLA_tissue_00051932	0.455591	3.74465	13.2379	0.000274351	0.014763
LRRK1_Taira201203_XENLA_tissue_00045091	0.332732	6.21644	13.1904	0.000281394	0.0151022
M11940.1	0.557459	8.80938	13.173	0.000284011	0.0152028
FSTL1_Taira201203_XENLA_stage_00188856	0.488889	4.51725	13.1618	0.000285715	0.0152541
TF_Taira201203_XENLA_stage_00163651	0.609817	3.38754	13.0961	0.000295918	0.0157418
ARPC1A_Taira201203_XENLA_tissue_00089077	1.14527	-0.340996	13.0931	0.000296391	0.0157418
SRSF7_Taira201203_XENLA_stage_00159920	-0.328257	5.93149	13.0573	0.000302101	0.0160035
NM_001087779.1	0.670704	1.59848	13.0276	0.000306929	0.0162173
NA_Horb201201_XENLA_00145901	0.389653	9.73002	13.0111	0.000309656	0.0163192
NM_001087348.1	0.785081	1.11921	12.9814	0.000314604	0.0165373
X12500.1	1.08889	0.449554	12.9555	0.000318991	0.016725
NYNRIN_Quigley201207_XENLA_00086369	0.345723	7.61263	12.8831	0.000331557	0.0173393
F7DJY3_XENTR_Horb201201_XENLA_00176644	0.771992	1.13969	12.878	0.00033247	0.0173427
NM_001090433.1	0.779584	1.22381	12.8728	0.00033339	0.0173465
PLOD2_TC425298	1.22007	1.80846	12.8464	0.000338127	0.0175483
NA_XeXenL6RMv10011602m	-0.557344	4.51452	12.8402	0.000339257	0.0175623
NM_001093559.1	0.368534	6.10093	12.8018	0.00034629	0.0178811
XK81A1_Ismailoglu201203_XENLA_00034910	0.599415	3.0141	12.7844	0.000349517	0.0179895
NA_TC454221	0.761453	1.0246	12.7811	0.000350147	0.0179895
MSI1_Taira201203_XENLA_stage_00208498	0.389025	5.23291	12.7307	0.000359693	0.0184336
DNAJB1_Park201106_XENLA_00101765	-0.528564	3.88733	12.7196	0.000361841	0.0184973
LRRC16B_Taira201203_XENLA_tissue_00111593	0.917969	0.620676	12.6393	0.000377717	0.0192608
SERPINB10_Taira201203_XENLA_tissue_00261973	1.04152	-0.010607	12.6307	0.000379471	0.0193021
HMOX1_Park201106_XENLA_00018974	0.35722	6.09644	12.6243	0.000380761	0.0193196
ZSWIM4_TC414203	-0.29327	8.8993	12.6194	0.000381769	0.0193228
MAFB_Taira201203_XENLA_tissue_00222808	-0.699757	3.01109	12.6005	0.000385648	0.0194709
PCDH18_Taira201203_XENLA_tissue_00163321	0.389738	4.64736	12.591	0.000387599	0.0195182
NA_Taira201203_XENLA_tissue_00239438	-0.517025	2.56121	12.5867	0.000388493	0.0195182
NKX6-2_Taira201203_XENLA_tissue_00121880	0.615857	1.83588	12.5791	0.000390079	0.0195499
GJC2_Taira201203_XENLA_tissue_00059974	-0.641955	3.10579	12.5704	0.000391903	0.0195932
CADM1_Kwon201107_XENLA_00130885	0.371491	6.02166	12.5572	0.00039469	0.0196844
NA_TeperekTkacz201206_XENLA_00102697	0.821647	0.7405	12.4448	0.000419154	0.0208537
COL18A1_Taira201203_XENLA_tissue_00199669	0.333854	6.22507	12.4381	0.000420654	0.0208775
TTC18_Taira201203_XENLA_stage_00191716	0.561099	2.27182	12.3998	0.00042939	0.0212595
EPAS1_Taira201203_XENLA_tissue_00009422	0.351657	5.62127	12.3837	0.000433105	0.0213916
PRRX1_Amin201106_XENLA_00048527	1.08786	-0.302655	12.3084	0.00045092	0.0222178
CYP11A1_XeXenL6RMv10039275m	0.65458	3.20745	12.298	0.00045344	0.0222883
NAV2_Taira201203_XENLA_tissue_00189484	0.343122	5.6383	12.2779	0.000458359	0.0224224
NM_001090451.1	0.463411	6.04705	12.2762	0.000458774	0.0224224
TBC1D24.2_Chung201110_XENLA_00058159	0.5679	3.40945	12.2734	0.000459457	0.0224224
KIF26A_Taira201203_XENLA_stage_00014469	0.650904	1.57677	12.2517	0.000464836	0.0226309
NOVA2_Ismailoglu201203_XENLA_00023819	0.418541	4.52958	12.245	0.000466514	0.0226586
NM_001087030.1	1.17661	-0.484111	12.2238	0.000471849	0.0228634
NM_001086828.1	0.643698	2.35659	12.2141	0.000474287	0.0229273
CDKN2C_Taira201203_XENLA_tissue_00150266	0.551395	2.29178	12.2066	0.000476216	0.0229662
EBF2_Taira201203_XENLA_stage_00131856	0.907208	0.576988	12.164	0.000487218	0.0234415
NA_Taira201203_XENLA_stage_00096616	0.905054	0.263527	12.1437	0.000492542	0.023642
NKX2-5_Quigley201112_XENLA_00008668	0.695068	1.3017	12.1225	0.00049818	0.0238566
NM_001090246.1	0.396241	4.40546	12.0938	0.000505893	0.0241548
HAPLN3_TC415680	0.495078	2.98254	12.0906	0.000506769	0.0241548
A9JTN1_XENTR_Ismailoglu201203_XENLA_00027820	-0.784244	1.43219	12.0372	0.000521496	0.0247589
GPR56_XeXenL6RMv10009103m	0.343401	5.98102	12.0342	0.000522319	0.0247589
NM_001086660.1	1.08205	-0.158911	12.0316	0.000523075	0.0247589
NM_001090344.1	0.552396	6.59091	12.0132	0.000528247	0.024946
TBX6_TeperekTkacz201202_XENLA_00038364	0.346503	7.49047	11.9709	0.000540372	0.0254597
BC044072.1	0.395353	5.1106	11.9283	0.000552884	0.0258295
NA_Quigley201112_XENLA_00021935	0.962639	0.678885	11.9256	0.000553669	0.0258295
FIGN_Taira201203_XENLA_tissue_00121085	0.646275	1.61979	11.9244	0.000554036	0.0258295
SSR3_Ismailoglu201203_XENLA_00059223	0.340773	5.42541	11.9213	0.000554956	0.0258295
HKDC1_Horb201201_XENLA_00044095	0.349983	5.8772	11.9196	0.000555476	0.0258295
NA_Chung201110_XENLA_00012083	0.534056	3.47768	11.9185	0.0005558	0.0258295
LDLRAP1_Taira201203_XENLA_tissue_00140720	-0.305932	6.99647	11.8786	0.000567836	0.0262886
BC155932.1	0.609534	2.32554	11.8772	0.00056825	0.0262886
VASH2_Taira201203_XENLA_tissue_00027907	0.403819	4.74377	11.7979	0.00059299	0.0273119
NP_001119976.1_Ismailoglu201203_XENLA_00001405	-0.577459	2.64832	11.7977	0.000593039	0.0273119
PLXNA3_XeXenL6RMv10012338m	0.411462	4.14743	11.7886	0.000595946	0.0273841
NM_001085847.1	1.14323	-0.18214	11.7476	0.000609223	0.0279314
AGMO_Ismailoglu201203_XENLA_00024260	0.551677	2.94274	11.7305	0.000614852	0.0281264
TSHZ1_Taira201203_XENLA_tissue_00069597	0.867101	0.393776	11.7212	0.000617934	0.0282043
ABR_Ismailoglu201203_XENLA_00011078	-0.401116	5.26977	11.7058	0.000623067	0.0283288
BMI1_Ismailoglu201203_XENLA_00021445	0.419015	4.99443	11.7047	0.000623434	0.0283288
ANKRD24_TeperekTkacz201206_XENLA_00101752	0.493872	2.87028	11.6729	0.000634177	0.0286935
FDFT1_Taira201203_XENLA_stage_00076027	-0.612645	3.41375	11.6725	0.000634315	0.0286935
CALCRL_Kwon201107_XENLA_00088962	-0.642308	1.70139	11.6685	0.000635669	0.0286935
UBIAD1_Taira201203_XENLA_tissue_00223618	0.513322	2.73803	11.6571	0.000639595	0.0288071
NRP1_Taira201203_XENLA_stage_00041927	1.02154	-0.242332	11.6528	0.000641059	0.0288096
NM_001095695.1	0.524092	3.87004	11.6179	0.00065321	0.0292426
ITPR3_Taira201203_XENLA_tissue_00251023	0.363599	5.73906	11.6169	0.000653554	0.0292426
GPR110_Quigley201207_XENLA_00116845	0.482372	3.0078	11.5933	0.000661907	0.0295266
CRABP2_TeperekTkacz201206_XENLA_00064863	0.29336	6.35238	11.5908	0.00066279	0.0295266
SFRP1_Taira201203_XENLA_tissue_00209861	0.510923	3.01349	11.5791	0.000666972	0.0296483
EZR_Park201106_XENLA_00146435	0.722265	1.01867	11.535	0.000682972	0.0302937
MN1_Ismailoglu201203_XENLA_00041117	0.334719	7.72219	11.5068	0.000693416	0.0306904
SLC25A46_Taira201203_XENLA_tissue_00029815	-0.487519	2.83097	11.4872	0.000700756	0.0309483
ADCY9_TeperekTkacz201202_XENLA_00029581	0.411677	4.52516	11.4795	0.000703663	0.0310097
MYOD1_Taira201203_XENLA_tissue_00232010	0.387482	5.2015	11.4742	0.000705704	0.0310328
NA_Quigley201112_XENLA_00100591	0.53198	3.13278	11.4479	0.000715749	0.0314069
IRF1_XeXenL6RMv10001272m	0.630367	2.18858	11.4247	0.000724731	0.0316917
EPHA7_Audic201207_XENLA_00001888	0.631726	1.50898	11.4199	0.000726612	0.0316917
WWC3_XeXenL6RMv10024995m	0.967411	-0.424964	11.4192	0.000726889	0.0316917
PIK3R5_Taira201203_XENLA_tissue_00152384	0.827626	0.659357	11.3556	0.000752223	0.0327265
NM_001089811.1	0.647033	1.57996	11.3414	0.000757972	0.0329066
NM_001086935.1	1.33348	-0.80759	11.2706	0.000787456	0.0340878
SLC25A4_TC434493	0.893093	0.477089	11.2681	0.000788514	0.0340878
MITD1_Taira201203_XENLA_stage_00169215	-0.795919	0.624121	11.2553	0.000793955	0.0342506
NA_Taira201203_XENLA_tissue_00084273	0.871819	0.581577	11.2413	0.000799958	0.0344369
NOX1_Taira201203_XENLA_tissue_00235846	0.398686	3.91696	11.1969	0.000819344	0.0351974
XB-GENE-5897454_TeperekTkacz201206_XENLA_00013361	0.471581	7.49084	11.1902	0.000822324	0.035246
NM_001087072.1	0.432956	4.85087	11.1865	0.000823925	0.035246
CDKNX_XeXenL6RMv10048126m	0.276967	6.73923	11.1795	0.000827064	0.0353065
TBX2_Chung201110_XENLA_00027864	0.388942	5.60699	11.1463	0.000842009	0.0358696
GNPAT_XeXenL6RMv10013544m	-0.510778	2.7825	11.1331	0.000847994	0.0360494
LGALS1_Taira201203_XENLA_tissue_00292544	-1.24077	0.0440281	11.1267	0.000850951	0.0360501
LRP2_Quigley201112_XENLA_00119416	0.51333	2.74112	11.1254	0.000851536	0.0360501
HSPG2_Ismailoglu201203_XENLA_00073381	0.32307	7.04776	11.1206	0.00085372	0.0360679
VGLL2_Audic201207_XENLA_00005101	0.979301	2.62318	11.1141	0.000856735	0.0361207
PKP1_Taira201203_XENLA_tissue_00019803	0.481152	4.78328	11.0911	0.000867441	0.0364968
F7DB68_XENTR_Taira201203_XENLA_tissue_00162914	1.05503	-0.260512	11.0825	0.000871458	0.0365347
BC087472.1	0.398105	3.89193	11.0815	0.000871916	0.0365347
SCYL2_Taira201203_XENLA_stage_00143106	-0.433661	3.44943	11.0643	0.000880073	0.0368011
SLC19A2_Quigley201112_XENLA_00072015	0.406702	3.8176	11.0366	0.000893322	0.0372789
FZD10_TC415487	0.415662	4.65196	11.0167	0.000902953	0.037604
NM_001092621.1	-0.488886	3.47203	11.0008	0.000910724	0.0378465
C20ORF194_Taira201203_XENLA_stage_00155046	-1.09561	-0.666616	10.9972	0.000912476	0.0378465
MUC4_Quigley201207_XENLA_00047973	0.615796	3.35129	10.9635	0.00092922	0.038415
ANK3_Taira201203_XENLA_tissue_00130016	0.319845	6.54172	10.9601	0.000930969	0.038415
MYO1C_Kwon201107_XENLA_00048539	-0.307545	6.03633	10.9584	0.000931819	0.038415
CDX2_Taira201203_XENLA_stage_00057611	0.34999	8.79115	10.9321	0.000945118	0.0388848
SERTAD1_Taira201203_XENLA_stage_00047163	-0.482231	3.96651	10.918	0.000952322	0.0391026
POST_Horb201201_XENLA_00053330	0.317209	7.501	10.9111	0.000955909	0.0391028
INF2_Ismailoglu201203_XENLA_00037936	-0.508713	2.61591	10.9106	0.000956162	0.0391028
NA_XeXenL6RMv10007818m	0.491585	3.04234	10.9069	0.000958065	0.0391028
CASK_Ismailoglu201203_XENLA_00022117	0.372579	4.48747	10.882	0.000971058	0.0394486
NM_001085743.1	1.21559	-0.845688	10.879	0.000972613	0.0394486
NA_TeperekTkacz201202_XENLA_00131478	0.60844	2.27333	10.8771	0.000973592	0.0394486
BIX1.2_TC420565	-0.54776	2.83277	10.8759	0.000974255	0.0394486
PPP2R2B_Taira201203_XENLA_tissue_00184925	-0.412813	4.39783	10.8694	0.000977682	0.0395092
DQ096851.1	0.327005	9.19494	10.8278	0.000999889	0.0403269
NM_001096806.1	-0.406594	4.14814	10.8068	0.00101127	0.04065
NM_001092642.1	-0.520482	2.99982	10.8025	0.00101365	0.04065
NM_001093364.1	-0.441721	3.33085	10.8021	0.00101386	0.04065
NM_001174014.1	1.02125	-0.606405	10.7822	0.00102479	0.0410075
ROR1_Taira201203_XENLA_tissue_00035359	0.476366	3.75361	10.7635	0.0010352	0.0413433
SIX1_Audic201207_XENLA_00006789	0.477875	2.98091	10.7313	0.00105339	0.0419877
PDP2_Taira201203_XENLA_stage_00022351	0.520142	3.29181	10.7255	0.00105671	0.0420008
H1FOO_Ismailoglu201203_XENLA_00020761	-0.453751	4.30434	10.7235	0.00105782	0.0420008
SLC26A9_Taira201203_XENLA_tissue_00253215	0.590189	1.73568	10.7036	0.00106929	0.0423738
DMRT2_XeXenL6RMv10052390m	1.06601	-0.677802	10.6855	0.00107978	0.0427065
TRIM67_Ismailoglu201203_XENLA_00046035	0.343846	5.42782	10.6797	0.0010832	0.0427593
XB-GENE-5822257_TeperekTkacz201202_XENLA_00098079	-0.500024	3.91847	10.6667	0.00109084	0.0429557
RYR1_Taira201203_XENLA_stage_00086305	0.8296	1.36382	10.6641	0.00109238	0.0429557
BMPER_TC418159	0.451611	3.29005	10.6424	0.00110526	0.0433396
NA_Taira201203_XENLA_tissue_00239066	-0.796815	0.415298	10.6374	0.00110822	0.0433396
BC077440.1	-0.280009	7.79616	10.637	0.0011085	0.0433396
TUSC2_TC418354	0.445384	3.08263	10.6328	0.00111101	0.0433547
ROR2_TeperekTkacz201206_XENLA_00120587	0.351123	6.98238	10.6189	0.00111938	0.0435983
SLCO2B1_XeXenL6RMv10003025m	0.91892	0.258307	10.6146	0.00112198	0.0436088
MATN4_Taira201203_XENLA_tissue_00185804	0.464083	3.0971	10.6114	0.00112392	0.0436088
FST_TC424338	0.534427	3.19482	10.6036	0.00112866	0.04371
CLMP_Taira201203_XENLA_stage_00114774	0.681359	1.45538	10.5876	0.00113848	0.0440068
NM_001088036.1	-0.289698	6.9909	10.5799	0.00114326	0.0441084
SLC20A1_Kwon201107_XENLA_00009576	0.374571	5.228	10.5762	0.0011455	0.0441116
PTK2B_Taira201203_XENLA_tissue_00006004	0.49283	3.01202	10.5635	0.00115342	0.044333
NM_001086251.1	0.964467	3.42791	10.554	0.00115939	0.0444126
NA_Taira201203_XENLA_tissue_00059737	0.962139	-0.265671	10.5533	0.00115984	0.0444126
BMP7.2_Taira201203_XENLA_stage_00129077	-0.279497	9.20109	10.541	0.00116757	0.0446253
NFE2L3_TeperekTkacz201202_XENLA_00157367	0.411099	4.00175	10.5348	0.00117148	0.0446655
EXOC3L2_XeXenL6RMv10023286m	0.616307	2.03069	10.5324	0.00117299	0.0446655
KIAA1324_Taira201203_XENLA_tissue_00148244	0.399828	5.32006	10.5043	0.00119094	0.0452647
CBLN1_Taira201203_XENLA_tissue_00121916	0.692773	0.967117	10.4925	0.0011986	0.0454535
PCDH7_Taira201203_XENLA_tissue_00170267	0.492836	3.02914	10.4898	0.00120036	0.0454535
NA_Quigley201207_XENLA_00103616	0.303193	9.62476	10.4199	0.00124662	0.04707
NM_001095158.1	-0.29333	7.50123	10.4184	0.00124765	0.04707
CA7_TeperekTkacz201202_XENLA_00075957	0.393214	5.31787	10.3839	0.00127118	0.0477331
NM_001094580.1	0.286989	9.21882	10.3829	0.00127189	0.0477331
FBN1_XeXenL6RMv10042614m	0.741402	0.342136	10.3824	0.00127223	0.0477331
ZIC5_TC465332	0.801659	0.624285	10.379	0.00127456	0.0477332
NM_001088425.1	0.488831	4.05247	10.3691	0.00128139	0.047901
SLIT3_TC444690	1.09074	-0.810365	10.3479	0.00129623	0.0483675
NM_001095677.1	0.431824	3.78495	10.3362	0.00130444	0.0485849
SLC9A3_Taira201203_XENLA_stage_00032015	0.272874	7.24974	10.3264	0.00131142	0.048669
NM_001095797.1	0.392764	4.46014	10.3263	0.00131145	0.048669
NLRC4_Taira201203_XENLA_stage_00044876	0.350937	5.91882	10.3151	0.00131945	0.0488269
NM_001086363.1	-0.358026	8.77664	10.3135	0.0013206	0.0488269
CAPN13_Park201106_XENLA_00019507	0.45449	3.16798	10.3103	0.00132287	0.0488269
ASAP2_Taira201203_XENLA_tissue_00125021	-0.484337	2.64975	10.2866	0.00133998	0.0493693
RAB3D_Amin201106_XENLA_00009304	0.393284	4.68406	10.2687	0.00135303	0.0496504
LAMB1_Kwon201107_XENLA_00024419	0.277838	6.95604	10.2669	0.00135438	0.0496504
NM_001097051.1	-1.29437	-0.628682	10.2662	0.0013549	0.0496504

## Sheet: Kdm5b-spermatid
gene_id	logFC	logCPM	LR	PValue	FDR
MARCH7_TC415150	-1.75221	4.60881	183.847	7.00817e-42	1.48854e-37
NA_XeXenL6RMv10038027m	-1.5449	5.25823	156.876	5.44839e-36	5.78619e-32
NM_001091272.1	-2.2755	1.84334	127.882	1.19133e-29	8.43465e-26
KIAA1549_Kwon201107_XENLA_00020592	-1.56366	3.42741	99.9853	1.53531e-23	8.15247e-20
NM_001095639.1	-1.42394	3.43719	93.3516	4.37817e-22	1.85985e-18
CENPV_Quigley201207_XENLA_00119696	-1.20683	4.50978	85.4053	2.4307e-20	8.60468e-17
HSF2_Taira201203_XENLA_stage_00110529	-1.17467	4.90767	83.7789	5.53331e-20	1.67896e-16
NM_001092439.1	-1.16177	4.53473	83.0008	8.2019e-20	2.1776e-16
CHTOP_Ismailoglu201203_XENLA_00024515	-1.55287	3.60757	82.6779	9.65726e-20	2.27911e-16
MSL3_Kwon201107_XENLA_00001539	-0.971873	5.79968	79.1871	5.64978e-19	1.20001e-15
NM_001090059.1	-1.13959	5.27815	70.583	4.41305e-17	8.5212e-14
TTI1_XeXenL6RMv10031558m	-1.07532	4.03701	67.8756	1.74144e-16	3.08235e-13
BC081096.1	-0.955807	5.68049	66.8142	2.98347e-16	4.87453e-13
CCDC47_Quigley201207_XENLA_00014165	-0.925978	6.7034	66.5882	3.34579e-16	5.07604e-13
NA_Taira201203_XENLA_stage_00115332	-0.823109	7.85607	66.3045	3.86382e-16	5.47118e-13
NM_001093490.1	-0.888562	6.216	65.5146	5.76863e-16	7.65785e-13
PTAFR_Taira201203_XENLA_stage_00163362	-1.36476	6.93272	64.6405	8.98866e-16	1.12305e-12
RBM4B_TeperekTkacz201206_XENLA_00044005	-0.787068	6.88799	64.455	9.87617e-16	1.15479e-12
SLC39A7_TeperekTkacz201202_XENLA_00061207	-0.834472	7.08301	64.3665	1.03301e-15	1.15479e-12
LMOD1_Amin201106_XENLA_00079112	-1.60225	1.57593	63.7761	1.39394e-15	1.48037e-12
NM_001096098.1	-1.23051	3.80917	63.0164	2.04996e-15	2.07339e-12
NA_Taira201203_XENLA_stage_00064295	-1.0842	4.84017	62.5993	2.53339e-15	2.44587e-12
RBM12_Ismailoglu201203_XENLA_00024540	-0.963514	8.08823	61.8064	3.7894e-15	3.49943e-12
CDC37L1_Taira201203_XENLA_stage_00008261	-1.10327	3.65354	61.5246	4.37247e-15	3.8305e-12
C14ORF135_XeXenL6RMv10037599m	-1.18904	3.19042	61.4642	4.50859e-15	3.8305e-12
PIN4_Taira201203_XENLA_stage_00203237	-0.877225	5.50828	61.1298	5.34332e-15	4.36508e-12
LSM4_Quigley201207_XENLA_00106001	-1.16591	4.16731	60.9844	5.7529e-15	4.52562e-12
NUDT1_Quigley201207_XENLA_00042044	-1.22873	2.42518	59.1767	1.44127e-14	1.09331e-11
C12ORF45_Taira201203_XENLA_tissue_00160511	-1.1534	3.60021	59.0352	1.54879e-14	1.13435e-11
TNFSF10L_Quigley201112_XENLA_00041249	-1.24242	4.91018	56.5737	5.4131e-14	3.83247e-11
CA14_Ismailoglu201203_XENLA_00030232	-1.13416	7.47863	54.5716	1.49887e-13	1.02697e-10
MXI1_Taira201203_XENLA_stage_00119850	-0.9709	4.23337	54.2428	1.77186e-13	1.17607e-10
SST_Amin201106_XENLA_00067252	-1.78722	1.9333	51.8048	6.1302e-13	3.94562e-10
PIAS4_Taira201203_XENLA_tissue_00287920	-0.806129	5.83395	51.2997	7.92885e-13	4.9532e-10
NCSTN_Ismailoglu201203_XENLA_00060889	-0.808202	5.94677	50.9711	9.3734e-13	5.68831e-10
NIF_Taira201203_XENLA_stage_00073688	-1.0946	4.51994	50.1173	1.44824e-12	8.54463e-10
PRR5L_Park201106_XENLA_00160942	-0.899454	5.99175	49.9741	1.55787e-12	8.94302e-10
ZNF668_TeperekTkacz201202_XENLA_00060330	-0.858374	5.23153	48.7914	2.84687e-12	1.59125e-09
NRF1_Taira201203_XENLA_stage_00191475	-0.77725	5.94031	48.3723	3.52505e-12	1.91979e-09
POGZ_Taira201203_XENLA_stage_00200055	-0.720768	6.28496	48.0729	4.10669e-12	2.1798e-09
RRAS_Chung201110_XENLA_00076359	-1.09409	3.00105	47.9895	4.28517e-12	2.1798e-09
BC049292.1	-1.49879	2.444	47.978	4.31034e-12	2.1798e-09
KIAA1191_Taira201203_XENLA_stage_00124817	-0.953818	3.72539	47.531	5.41421e-12	2.67437e-09
NM_001088653.1	-1.11267	4.63412	47.2411	6.27696e-12	3.03006e-09
NM_001177440.1	-1.00336	3.97525	46.5075	9.12698e-12	4.30793e-09
NM_001086203.1	-0.75588	5.73856	45.7763	1.32561e-11	6.12086e-09
WDR46_Taira201203_XENLA_stage_00162737	-0.70978	6.25881	45.4311	1.58105e-11	7.01988e-09
NM_001087217.1	-1.0551	5.70693	45.4245	1.58641e-11	7.01988e-09
NSL1_Ismailoglu201203_XENLA_00061081	-0.880261	4.33048	44.7507	2.23786e-11	9.70046e-09
NM_001090356.1	-0.98305	3.86484	44.3061	2.80834e-11	1.19298e-08
TCF24_Taira201203_XENLA_stage_00095200	-1.36485	2.18889	43.6831	3.86083e-11	1.60792e-08
ASB7_Kwon201107_XENLA_00049214	-1.14296	1.79986	42.882	5.81443e-11	2.37497e-08
NM_001092436.1	-0.824581	5.93179	42.5757	6.79989e-11	2.72509e-08
NM_001096959.1	-0.994645	5.17021	42.5009	7.06491e-11	2.77886e-08
SUV420H1_Taira201203_XENLA_tissue_00221514	-0.805635	4.53867	42.3684	7.56006e-11	2.91956e-08
NM_001092335.1	-0.751286	5.17602	42.0697	8.80766e-11	3.34062e-08
NM_001096467.1	-0.725571	6.68138	41.4278	1.22307e-10	4.55755e-08
CDC25B_TeperekTkacz201206_XENLA_00085260	-0.699092	8.24275	41.2416	1.34529e-10	4.92653e-08
LSP1_Park201106_XENLA_00093877	-0.916355	6.09264	41.0454	1.48737e-10	5.35454e-08
FRMD8_Kwon201107_XENLA_00127258	-0.829014	5.16413	40.9441	1.56643e-10	5.48419e-08
CENPL_XeXenL6RMv10006381m	-0.786218	4.49003	40.9334	1.57503e-10	5.48419e-08
BC169885.1	-0.928163	4.38606	40.8039	1.68297e-10	5.76553e-08
M60076.1	-0.786482	7.14452	40.5514	1.91508e-10	6.45656e-08
OCT91_XeXenL6RMv10031376m	-0.763601	8.02478	40.295	2.18371e-10	7.24217e-08
ZMYND8_Kwon201107_XENLA_00059029	-0.954679	3.18513	40.266	2.2163e-10	7.24217e-08
WDR16_Ismailoglu201203_XENLA_00067115	-0.909582	4.69049	40.117	2.39195e-10	7.60804e-08
NM_001095747.1	-1.23847	2.58335	40.1105	2.3999e-10	7.60804e-08
TERF2IP_Taira201203_XENLA_stage_00160295	-0.774887	4.49954	40.0557	2.46828e-10	7.70973e-08
SMCR8_Kwon201107_XENLA_00086251	-0.764973	5.10772	39.4045	3.44507e-10	1.06048e-07
CASK_Ismailoglu201203_XENLA_00022117	-0.95161	4.47921	38.3908	5.79034e-10	1.75696e-07
CD82_TC428676	-0.790994	5.14565	38.2651	6.17583e-10	1.84753e-07
PHKG2_XeXenL6RMv10024553m	0.872979	4.23722	37.9391	7.29884e-10	2.15316e-07
ADRA2A_XeXenL6RMv10032306m	-1.62429	-0.0154512	37.9116	7.40254e-10	2.15384e-07
C9ORF72_Taira201203_XENLA_tissue_00168358	-1.00761	2.73071	37.7363	8.09816e-10	2.32439e-07
LRRK1_Taira201203_XENLA_tissue_00045091	-0.741621	6.28546	37.6813	8.32975e-10	2.35898e-07
NM_001127783.1	-0.66091	6.34297	37.4746	9.26119e-10	2.58826e-07
BC128959.1	-1.01688	2.8306	37.1682	1.08368e-09	2.98926e-07
NA_Taira201203_XENLA_tissue_00046894	-0.859626	4.17284	37.0978	1.12352e-09	3.05943e-07
C19ORF20_Taira201203_XENLA_tissue_00207776	-1.22989	1.11112	36.772	1.32781e-09	3.56997e-07
HAP1_Taira201203_XENLA_tissue_00240791	-0.754794	6.52649	36.7127	1.36881e-09	3.6342e-07
SGK223_Ismailoglu201203_XENLA_00013157	-0.664865	7.02803	36.6821	1.39054e-09	3.64629e-07
EIF4A2_Park201106_XENLA_00130244	-1.0284	4.78786	36.3883	1.61671e-09	4.18766e-07
ASB7_TeperekTkacz201202_XENLA_00094332	-0.796123	4.65884	36.3183	1.67587e-09	4.28861e-07
F7CXE9_XENTR_Ismailoglu201203_XENLA_00020699	-0.728846	5.09994	36.151	1.82606e-09	4.61731e-07
CINP_Kwon201107_XENLA_00038636	-0.700089	5.53619	36.0437	1.92944e-09	4.82134e-07
ARHGEF19_Quigley201207_XENLA_00022263	-0.884351	5.16381	35.8538	2.1269e-09	5.22734e-07
NM_001086490.1	-1.00313	3.20989	35.8225	2.16136e-09	5.22734e-07
NM_001092646.1	-0.588848	9.26938	35.8063	2.17944e-09	5.22734e-07
NA_Taira201203_XENLA_stage_00068294	-0.91419	3.15569	35.7965	2.19036e-09	5.22734e-07
NM_001092053.1	-0.74849	4.35563	35.6341	2.38079e-09	5.61866e-07
RRM2.2_Taira201203_XENLA_stage_00110223	-0.797637	5.88124	35.5969	2.4268e-09	5.6643e-07
B1WBL3_XENTR_Taira201203_XENLA_stage_00027340	-0.870298	5.69263	35.374	2.72093e-09	6.28179e-07
CEP85_Kwon201107_XENLA_00067703	-0.745438	5.04301	35.2985	2.82848e-09	6.45989e-07
ZNF684_Kwon201107_XENLA_00132112	-0.85067	4.92766	35.238	2.91768e-09	6.59272e-07
SEPHS1_XeXenL6RMv10009230m	-1.04458	2.48227	35.0803	3.16379e-09	6.97758e-07
NA_Taira201203_XENLA_stage_00034511	-1.07073	3.58414	35.074	3.17411e-09	6.97758e-07
C12ORF45_Taira201203_XENLA_tissue_00115817	-0.690257	5.34598	35.0664	3.18656e-09	6.97758e-07
RPS10_XeXenL6RMv10044220m	-0.678204	5.57443	35.033	3.24166e-09	7.02579e-07
ZNF420_Taira201203_XENLA_tissue_00260028	-0.895346	3.06523	34.9357	3.40768e-09	7.23885e-07
NA_Taira201203_XENLA_tissue_00149494	-0.821024	4.08028	34.9355	3.40812e-09	7.23885e-07
NM_001094750.1	-0.917203	2.51219	34.8181	3.61998e-09	7.61271e-07
FOXA2_Quigley201112_XENLA_00082222	-0.99388	5.53982	34.722	3.80303e-09	7.91924e-07
NM_001086843.1	-0.719107	4.96508	34.6807	3.88474e-09	8.01086e-07
NM_001086207.1	-0.818934	5.222	34.6072	4.03421e-09	8.2391e-07
PTPN12_Taira201203_XENLA_tissue_00019021	0.778669	4.49605	34.5167	4.22608e-09	8.54876e-07
BC097895.1	-0.87921	3.86314	34.4685	4.33199e-09	8.61233e-07
NKAIN1_Park201106_XENLA_00129369	-0.815618	3.96971	34.4654	4.339e-09	8.61233e-07
AF393655.1	-0.932659	5.7023	34.4475	4.37915e-09	8.61233e-07
BC124855.1	-0.580031	6.88839	34.4063	4.47265e-09	8.7155e-07
OSR1_Park201106_XENLA_00039544	-1.00187	1.97547	34.3432	4.62014e-09	8.92108e-07
NM_001092230.1	-0.803585	4.3754	34.21	4.9475e-09	9.46711e-07
TUBB4B_TeperekTkacz201206_XENLA_00067961	-2.05659	-0.757173	34.1456	5.11375e-09	9.69787e-07
TCTE1_Quigley201112_XENLA_00115918	-1.59759	0.488797	34.0385	5.40334e-09	1.01564e-06
NA_Taira201203_XENLA_stage_00029115	-0.662545	6.53379	33.9415	5.67952e-09	1.05819e-06
RBM33_Taira201203_XENLA_tissue_00291124	-0.630314	6.76097	33.8569	5.93184e-09	1.09558e-06
BC158208.1	-0.903772	2.78613	33.6846	6.48117e-09	1.17889e-06
HPGD_TeperekTkacz201206_XENLA_00117768	-0.893964	3.58321	33.6808	6.49386e-09	1.17889e-06
NA_Taira201203_XENLA_tissue_00097709	-0.878313	4.68126	33.4585	7.27991e-09	1.31038e-06
KIAA1191_Taira201203_XENLA_stage_00060864	-1.03658	1.81451	33.4291	7.39094e-09	1.31919e-06
NA_TC426513	0.927714	2.45551	33.1739	8.42721e-09	1.49162e-06
BC169986.1	-0.724687	6.04614	32.8915	9.74466e-09	1.71055e-06
ARFRP1_XeXenL6RMv10020148m	-0.731406	4.49708	32.8515	9.94759e-09	1.73186e-06
NP_001096221.1_Taira201203_XENLA_tissue_00085960	-1.18386	1.03617	32.7981	1.02247e-08	1.76563e-06
L29057.1	-0.79001	8.06719	32.7755	1.03443e-08	1.77188e-06
MMP14_Amin201106_XENLA_00082467	-0.880527	6.96452	32.7413	1.05275e-08	1.78371e-06
CINP_Taira201203_XENLA_tissue_00041651	-0.823434	3.28632	32.7314	1.05813e-08	1.78371e-06
ZNF518A_Taira201203_XENLA_stage_00039070	-0.710546	5.00688	32.7039	1.0732e-08	1.79487e-06
NM_001097027.1	-0.923698	2.17823	32.3827	1.26612e-08	2.10096e-06
NM_001093559.1	-0.649124	5.91499	32.3673	1.27615e-08	2.10119e-06
GRWD1_XeXenL6RMv10001517m	-0.82243	3.69799	32.3457	1.29044e-08	2.10838e-06
NA_Taira201203_XENLA_stage_00059373	-0.772841	3.61154	32.2918	1.32674e-08	2.15114e-06
SMCR7L_TeperekTkacz201202_XENLA_00007644	-0.768229	3.52686	32.2728	1.33974e-08	2.15576e-06
NM_001086235.1	-0.854116	3.97265	32.2511	1.35483e-08	2.16365e-06
SELS_Taira201203_XENLA_stage_00089402	-0.745444	5.03201	32.145	1.43083e-08	2.26797e-06
BC045251.1	-0.837086	5.36104	31.5215	1.97249e-08	3.10339e-06
CDK1_Ismailoglu201203_XENLA_00012327	-0.8534	5.20085	31.4801	2.01491e-08	3.12433e-06
NM_001086688.1	-0.668292	6.32713	31.4798	2.01522e-08	3.12433e-06
BC108824.1	-0.576508	6.19475	31.3516	2.15278e-08	3.31342e-06
FBXL19_XeXenL6RMv10003186m	-0.752757	4.19461	31.3279	2.17928e-08	3.33006e-06
BC161684.1	-0.70743	5.28567	31.2071	2.31918e-08	3.51853e-06
SMC2_TC414107	-0.579844	6.88377	31.1902	2.33939e-08	3.52401e-06
MAB21L3_Horb201201_XENLA_00076044	-0.82896	4.08528	30.8893	2.7317e-08	4.086e-06
DENND2C_Taira201203_XENLA_stage_00125967	-0.759562	5.43647	30.7625	2.91626e-08	4.33157e-06
NM_001087887.1	-0.803984	6.04146	30.744	2.94407e-08	4.3425e-06
NM_001093566.1	-0.739913	5.03546	30.6876	3.03091e-08	4.43976e-06
NA_Taira201203_XENLA_tissue_00009263	-1.51861	0.0253631	30.6432	3.10112e-08	4.49953e-06
CHD2_Taira201203_XENLA_stage_00145178	-0.867682	6.41372	30.6247	3.13077e-08	4.49953e-06
PHKG1_Taira201203_XENLA_stage_00120419	-1.29944	0.353764	30.618	3.1416e-08	4.49953e-06
SMARCE1_Taira201203_XENLA_stage_00085796	-0.52426	8.33291	30.6089	3.15645e-08	4.49953e-06
NM_001095570.1	-0.530737	7.29281	30.3121	3.67825e-08	5.2084e-06
NUF2_Ismailoglu201203_XENLA_00017798	-0.632968	5.35479	30.2864	3.72732e-08	5.24293e-06
TMPRSS9_Taira201203_XENLA_stage_00111976	-0.979821	5.57489	30.2081	3.88086e-08	5.42298e-06
DHX9_Ismailoglu201203_XENLA_00028078	-0.512742	7.83549	30.0421	4.22759e-08	5.8689e-06
NA_TC432186	-0.829274	5.78035	30.0107	4.29669e-08	5.92608e-06
BC070776.1	0.550537	8.52363	29.9825	4.35961e-08	5.97407e-06
HSP90AA1.1_Park201106_XENLA_00156051	-0.859828	3.28327	29.8234	4.73242e-08	6.44337e-06
C15ORF42_TeperekTkacz201202_XENLA_00152804	1.37198	0.607203	29.7529	4.9078e-08	6.6396e-06
TIPRL_Kwon201107_XENLA_00010185	-0.823374	3.2984	29.67	5.12215e-08	6.86572e-06
BLZF1_Ismailoglu201203_XENLA_00058864	-0.639046	6.99752	29.6634	5.13959e-08	6.86572e-06
THUMPD2_Ismailoglu201203_XENLA_00044111	-0.74181	3.42254	29.529	5.5087e-08	7.3128e-06
BRD8_Ismailoglu201203_XENLA_00064132	-0.669937	4.65525	29.501	5.58878e-08	7.37302e-06
NP_001005025.1_TC414446	1.64522	1.3158	29.3311	6.10088e-08	7.99893e-06
NA_Ismailoglu201203_XENLA_00045177	-0.967346	2.27211	29.2899	6.23196e-08	8.12066e-06
NCKAP5L_Kwon201107_XENLA_00082726	-0.612775	5.63049	29.2043	6.51352e-08	8.43581e-06
NA_TeperekTkacz201202_XENLA_00058071	-0.799763	4.15893	29.1443	6.71827e-08	8.64825e-06
NM_001094013.1	-0.763818	2.9119	29.0618	7.01067e-08	8.97027e-06
C10ORF81_Taira201203_XENLA_tissue_00179798	-1.00869	3.3591	29.0208	7.16042e-08	9.10702e-06
NM_001094613.1	-0.797871	3.62982	28.9583	7.39541e-08	9.34991e-06
BC085223.1	-0.639572	5.0236	28.8573	7.79113e-08	9.79192e-06
RCN3_TeperekTkacz201202_XENLA_00028159	-0.887212	3.32174	28.7213	8.3579e-08	1.04425e-05
TMEM183A_Taira201203_XENLA_stage_00158049	-0.721266	3.43222	28.6823	8.52805e-08	1.05627e-05
BC077368.1	-0.737464	3.42663	28.6714	8.57605e-08	1.05627e-05
NM_001127833.1	0.736853	3.75528	28.6653	8.60334e-08	1.05627e-05
NM_001091889.1	-0.772715	3.32295	28.6415	8.70972e-08	1.06319e-05
TACC3_Taira201203_XENLA_stage_00064580	-0.639654	5.20091	28.4635	9.54828e-08	1.15889e-05
UPK2_Taira201203_XENLA_stage_00212986	-0.747715	6.21623	28.4325	9.70243e-08	1.17091e-05
FJX1_Taira201203_XENLA_tissue_00021756	-0.852735	3.35273	28.3941	9.89647e-08	1.1814e-05
BC071054.1	0.995197	1.7881	28.3933	9.9006e-08	1.1814e-05
CROCC_TeperekTkacz201206_XENLA_00048683	-0.75249	5.51726	28.3623	1.00605e-07	1.19377e-05
GMPS_Chung201110_XENLA_00034068	-0.591683	5.79178	28.3514	1.01174e-07	1.19386e-05
NOX1_Taira201203_XENLA_tissue_00235846	-0.815801	3.99494	28.3232	1.0266e-07	1.20265e-05
PRD10_XENTR_Taira201203_XENLA_tissue_00088008	-0.71511	3.7722	28.3158	1.03052e-07	1.20265e-05
SCYL3_Taira201203_XENLA_tissue_00013427	0.581298	5.84362	28.2639	1.0585e-07	1.22702e-05
NCSTN_XeXenL6RMv10054161m	-0.746236	3.86045	28.2558	1.06296e-07	1.22702e-05
PLAUR_Taira201203_XENLA_tissue_00281787	-0.937086	3.74898	28.2226	1.08133e-07	1.24148e-05
NP_001090731.1_Ismailoglu201203_XENLA_00070808	-0.647336	4.64484	28.1182	1.14126e-07	1.30324e-05
RXRB_TC414128	-0.660481	7.25053	28.0203	1.20049e-07	1.36355e-05
ADRB2_Taira201203_XENLA_tissue_00258486	-0.870553	3.4888	27.9898	1.21954e-07	1.37783e-05
ZBTB45_XeXenL6RMv10007692m	-0.778247	4.08956	27.9429	1.24947e-07	1.39774e-05
NM_001087470.1	-0.66653	4.632	27.9416	1.25034e-07	1.39774e-05
BC097825.1	-0.5546	6.41163	27.892	1.28278e-07	1.4265e-05
ZNHIT6_Taira201203_XENLA_stage_00165512	-0.618304	5.27997	27.7955	1.34839e-07	1.49166e-05
FZD2_Quigley201207_XENLA_00078350	-0.939343	4.78622	27.7114	1.40833e-07	1.54989e-05
ORC4_Taira201203_XENLA_tissue_00266376	-1.01696	1.4321	27.6612	1.44535e-07	1.58244e-05
OXR1_XENTR_TC414275	-0.606593	5.01349	27.6177	1.47819e-07	1.61009e-05
NM_001127747.1	-0.587434	6.09008	27.5531	1.5284e-07	1.65629e-05
C2ORF77_TeperekTkacz201206_XENLA_00068940	-0.778301	3.1841	27.5422	1.53706e-07	1.65721e-05
RG9MTD1_Taira201203_XENLA_stage_00207282	-0.897897	3.56241	27.4446	1.61657e-07	1.73414e-05
NA_Quigley201207_XENLA_00011145	-0.769263	4.65544	27.3949	1.65865e-07	1.77034e-05
VASN_Taira201203_XENLA_stage_00208009	-0.966667	1.76583	27.3355	1.71044e-07	1.81648e-05
POLQ_Taira201203_XENLA_stage_00135736	-0.5469	6.10005	27.3183	1.72569e-07	1.82357e-05
PPIL3_Amin201106_XENLA_00070949	-0.77129	3.2838	27.2587	1.77975e-07	1.87138e-05
ING2_Taira201203_XENLA_tissue_00092296	0.699575	4.02077	27.2464	1.79109e-07	1.87402e-05
NM_001091508.1	-0.550876	6.71303	27.2072	1.82777e-07	1.90303e-05
BC043745.1	-0.813878	4.02642	27.1677	1.86554e-07	1.93288e-05
BC080062.1	-1.00079	1.81018	27.128	1.90424e-07	1.9634e-05
NA_Taira201203_XENLA_tissue_00174444	1.66499	-0.0614611	27.0802	1.95192e-07	2.00284e-05
NM_001089073.1	-0.588358	7.11044	27.0201	2.01351e-07	2.05611e-05
NM_001089949.1	-0.981019	1.99708	26.9889	2.04628e-07	2.07957e-05
SPOPL_Ismailoglu201203_XENLA_00056404	-0.782451	4.16524	26.9273	2.11253e-07	2.13667e-05
NM_001091683.1	-0.939883	2.51517	26.9097	2.1319e-07	2.14604e-05
LOC398404_Taira201203_XENLA_tissue_00192178	-0.706956	5.83531	26.8475	2.20158e-07	2.20574e-05
RRM2.2_XeXenL6RMv10006651m	-1.19047	0.657354	26.8223	2.23045e-07	2.22417e-05
TUBB2B_Park201106_XENLA_00039936	-0.729925	4.34804	26.7875	2.27106e-07	2.25408e-05
NP_001090807.1_TC431746	-1.67544	-0.357605	26.6729	2.40982e-07	2.38068e-05
TOPORS_Taira201203_XENLA_stage_00073853	-0.541666	5.96549	26.6503	2.43811e-07	2.39747e-05
FOXM1_Kwon201107_XENLA_00070209	-0.508383	6.41115	26.5723	2.53853e-07	2.47543e-05
GHITM_TC429572	-0.654409	4.3739	26.5707	2.5407e-07	2.47543e-05
TMCO1_TC447182	-0.489831	8.00379	26.5611	2.5534e-07	2.47645e-05
NM_001094807.1	-0.579371	6.00711	26.4517	2.70215e-07	2.6088e-05
NM_001086340.1	-0.730487	6.5428	26.4122	2.75787e-07	2.6446e-05
CRY1_TC416338	-0.64257	4.83849	26.4079	2.76413e-07	2.6446e-05
PCNP_Taira201203_XENLA_tissue_00114808	-1.38236	0.848698	26.3772	2.8084e-07	2.67491e-05
ERAL1_XeXenL6RMv10025412m	-0.917686	2.40378	26.1992	3.07943e-07	2.90923e-05
ARFGAP1_Taira201203_XENLA_tissue_00174124	-0.844591	2.04404	26.1978	3.08181e-07	2.90923e-05
TMEM194A_Taira201203_XENLA_stage_00126159	-0.82362	3.19532	26.1584	3.14528e-07	2.956e-05
NM_001087340.1	-0.645348	6.19141	26.0517	3.32393e-07	3.10495e-05
TFDP2_XeXenL6RMv10033597m	-0.637926	4.3871	26.046	3.33387e-07	3.10495e-05
NA_Taira201203_XENLA_stage_00087708	-0.552122	6.67938	26.038	3.34762e-07	3.10495e-05
NFRKB_Taira201203_XENLA_tissue_00140364	-0.545252	5.99388	26.0223	3.37496e-07	3.11671e-05
GABPB2_Taira201203_XENLA_stage_00205001	-0.560365	5.73443	26.0074	3.4012e-07	3.12733e-05
IMPA1_XeXenL6RMv10027921m	-0.835124	2.89963	25.9163	3.56545e-07	3.25969e-05
NA_TC435501	-0.965171	3.5112	25.9107	3.57584e-07	3.25969e-05
PHRF1_TeperekTkacz201206_XENLA_00108667	-0.636941	6.86758	25.8852	3.62327e-07	3.28408e-05
ITPKA_Taira201203_XENLA_stage_00130543	0.657446	5.19827	25.8721	3.64803e-07	3.28408e-05
NM_001091234.1	-0.696317	3.9378	25.8716	3.64898e-07	3.28408e-05
APOLD1_Ismailoglu201203_XENLA_00053237	-1.09408	1.3158	25.8586	3.67366e-07	3.29234e-05
FZD2_XeXenL6RMv10049483m	-0.862985	6.12173	25.7469	3.8926e-07	3.4739e-05
NM_001093589.1	-0.490228	7.10823	25.6248	4.14673e-07	3.68521e-05
NM_001090141.1	-0.952928	4.11661	25.613	4.17215e-07	3.69235e-05
ZNF850_Taira201203_XENLA_tissue_00007099	-0.908228	2.7184	25.5634	4.2809e-07	3.77288e-05
TMEM53_Taira201203_XENLA_tissue_00199169	-0.643403	4.45274	25.5235	4.37024e-07	3.83569e-05
KCNK1_TC422233	1.37419	0.187841	25.4652	4.50438e-07	3.93716e-05
BC070799.1	0.749583	2.73069	25.2948	4.92043e-07	4.28319e-05
MED12_Audic201207_XENLA_00001053	-0.478338	7.42308	25.2454	5.04797e-07	4.37628e-05
NA_Ismailoglu201203_XENLA_00065943	-0.717584	3.04745	25.1834	5.21289e-07	4.4999e-05
G3BP2_XeXenL6RMv10031116m	-0.562558	7.56876	25.176	5.23294e-07	4.4999e-05
SH2D4B_Quigley201207_XENLA_00048865	-0.916386	1.65258	25.1267	5.36847e-07	4.59783e-05
JAM3_Taira201203_XENLA_stage_00015963	-0.888755	1.83842	25.0724	5.52177e-07	4.71013e-05
ZNF217_Taira201203_XENLA_stage_00066772	-0.558627	7.52975	25.0237	5.66312e-07	4.81139e-05
FOSL2_Quigley201112_XENLA_00079851	-0.986005	2.85606	24.9708	5.82041e-07	4.92532e-05
ITPRIP_TeperekTkacz201202_XENLA_00051398	-0.729841	4.08814	24.9415	5.90969e-07	4.98102e-05
TRIM71_TeperekTkacz201206_XENLA_00073504	-0.740322	3.18539	24.9075	6.01485e-07	5.04962e-05
BCL2L12_Taira201203_XENLA_stage_00014796	-0.748992	3.30836	24.8306	6.25968e-07	5.23447e-05
NM_001091067.1	-0.565834	5.57701	24.8118	6.32103e-07	5.26505e-05
TFPT_Taira201203_XENLA_stage_00001699	-0.816103	3.04523	24.7671	6.46913e-07	5.35152e-05
BANF1_TeperekTkacz201206_XENLA_00096415	-0.486827	7.41795	24.7653	6.47523e-07	5.35152e-05
ZNF770_Taira201203_XENLA_tissue_00024307	-0.728015	3.35042	24.7463	6.53941e-07	5.38361e-05
NA_Taira201203_XENLA_tissue_00047970	-0.828192	3.46494	24.7344	6.58003e-07	5.39614e-05
FPGS_Kwon201107_XENLA_00107148	-0.574388	5.65766	24.7262	6.60799e-07	5.39822e-05
KCNK16_Taira201203_XENLA_tissue_00002020	-0.899029	2.56579	24.636	6.92455e-07	5.63515e-05
RBM47_Quigley201207_XENLA_00040813	-0.899148	4.60669	24.6104	7.01715e-07	5.68871e-05
KIAA0247_TeperekTkacz201206_XENLA_00116800	-0.681989	6.36781	24.552	7.23304e-07	5.84144e-05
C5ORF44_Kwon201107_XENLA_00054179	-0.654707	3.90833	24.5324	7.30696e-07	5.87878e-05
NM_001086229.1	-0.673841	3.82485	24.3957	7.84423e-07	6.28722e-05
NM_001086533.1	-0.736511	3.27418	24.3635	7.97639e-07	6.36911e-05
ZBTB17_XeXenL6RMv10021831m	-0.574856	5.34911	24.3435	8.05997e-07	6.41175e-05
DDX26B_Kwon201107_XENLA_00091475	-0.728962	4.96891	24.3004	8.24201e-07	6.5321e-05
MCM6.2_TeperekTkacz201206_XENLA_00023780	-0.642027	5.50701	24.2795	8.33228e-07	6.5791e-05
NA_Audic201207_XENLA_00004537	-0.543963	6.07679	24.2158	8.61224e-07	6.77496e-05
MAST3_Taira201203_XENLA_stage_00203227	-0.498336	6.24922	24.1808	8.77042e-07	6.87393e-05
CDK1_Taira201203_XENLA_stage_00113188	-0.633198	6.37697	24.0297	9.48604e-07	7.40748e-05
RASSF10_Kwon201107_XENLA_00133606	-0.788915	3.53119	23.8983	1.01563e-06	7.9018e-05
LENG8_Taira201203_XENLA_stage_00130770	-0.78972	6.6892	23.8503	1.04128e-06	8.07178e-05
SNRNP200_XeXenL6RMv10021926m	-0.542475	7.50687	23.8088	1.06395e-06	8.21755e-05
SNX22_Amin201106_XENLA_00056497	0.538984	5.57387	23.7861	1.07657e-06	8.27727e-05
NM_001093138.1	-0.637335	4.47305	23.779	1.08053e-06	8.27727e-05
TMEM221_Park201106_XENLA_00056915	-1.0062	1.37096	23.774	1.08337e-06	8.27727e-05
C10ORF140_Taira201203_XENLA_stage_00100761	-0.783932	2.93992	23.7633	1.0894e-06	8.29352e-05
NM_001094606.1	0.864499	3.1513	23.7515	1.0961e-06	8.31471e-05
CDC25B_Taira201203_XENLA_tissue_00210652	-0.472251	7.28463	23.6965	1.12787e-06	8.50084e-05
C1ORF187_Taira201203_XENLA_stage_00079488	-0.958585	4.67709	23.6952	1.12864e-06	8.50084e-05
FBXO38_Ismailoglu201203_XENLA_00047016	-0.588943	4.64524	23.6329	1.16574e-06	8.74925e-05
SRPRB_Ismailoglu201203_XENLA_00032978	-0.661927	3.79384	23.5974	1.18747e-06	8.88096e-05
AC147142.1_Taira201203_XENLA_stage_00152439	-0.565216	5.76345	23.5617	1.20969e-06	9.01537e-05
NA_Taira201203_XENLA_tissue_00035172	-1.43028	-0.0577309	23.5508	1.21658e-06	9.03504e-05
LRP10_Ismailoglu201203_XENLA_00047768	-0.935882	3.11644	23.5071	1.24454e-06	9.21047e-05
PCGF6_TeperekTkacz201202_XENLA_00126842	-0.684541	3.26848	23.4646	1.27234e-06	9.38353e-05
ABLIM1_Taira201203_XENLA_tissue_00209512	-0.851856	3.11207	23.3769	1.33169e-06	9.78726e-05
SELK_Ismailoglu201203_XENLA_00001106	-0.627972	4.34168	23.0876	1.54784e-06	0.000113366
TONSL_Ismailoglu201203_XENLA_00066385	-0.52706	5.53321	23.0739	1.55896e-06	0.000113788
NM_001086838.1	-0.782466	3.97569	23.0667	1.56477e-06	0.000113821
NCOA6_Taira201203_XENLA_tissue_00216358	-0.518264	6.54134	22.9901	1.62839e-06	0.000118044
BC088974.1	-0.665969	3.1298	22.9644	1.65031e-06	0.000119227
GMEB1_XeXenL6RMv10010942m	-0.607987	4.81782	22.9487	1.66385e-06	0.000119797
ACSF2_Park201106_XENLA_00119376	-0.566127	5.59639	22.8698	1.7335e-06	0.00012439
NM_001089101.1	1.07096	2.83316	22.8502	1.75133e-06	0.000125221
NTN3_Ismailoglu201203_XENLA_00051104	-0.80979	2.71943	22.8441	1.75687e-06	0.000125221
CLDN4_TeperekTkacz201206_XENLA_00076449	-0.441228	8.86631	22.7605	1.83495e-06	0.000130349
EIF6_XeXenL6RMv10034638m	-0.564411	4.98399	22.7416	1.85315e-06	0.000131203
FEM1C_TC416170	0.714007	2.96748	22.714	1.87991e-06	0.000132655
HSPA14_Taira201203_XENLA_stage_00005467	-0.592318	4.44704	22.6988	1.89484e-06	0.000133266
NM_001088578.1	-0.63147	4.27051	22.5753	2.02071e-06	0.00014165
BC128912.1	1.52954	-0.0351579	22.5422	2.05582e-06	0.000143397
SRP19_Ismailoglu201203_XENLA_00014666	-0.486306	6.55756	22.5391	2.05914e-06	0.000143397
NM_001127790.1	-0.590425	5.09086	22.5025	2.0987e-06	0.000145675
NM_001092803.1	-0.819574	2.28482	22.4757	2.12822e-06	0.000147242
NA_TC417998	-0.583453	5.4402	22.4313	2.17792e-06	0.000150192
NM_001089133.1	-0.65917	4.16112	22.4037	2.2095e-06	0.000151507
NA_XeXenL6RMv10037064m	-0.878298	2.58889	22.4022	2.21126e-06	0.000151507
ASF1B_XeXenL6RMv10044458m	-0.541551	5.27808	22.3781	2.23908e-06	0.00015292
CASS4_XeXenL6RMv10005639m	-0.591887	4.72502	22.3367	2.2879e-06	0.000155753
TMUB2_Park201106_XENLA_00030649	0.648138	3.92193	22.3295	2.2965e-06	0.000155839
HSH2D_Taira201203_XENLA_stage_00102768	-0.831107	3.02159	22.3074	2.32311e-06	0.000156867
ARHGEF2_Taira201203_XENLA_tissue_00146553	-0.475417	6.42024	22.3047	2.32642e-06	0.000156867
NA_Quigley201207_XENLA_00096125	-0.768446	3.08862	22.2764	2.36096e-06	0.000158306
FKBP1B_TC419372	0.972275	1.64323	22.275	2.36266e-06	0.000158306
UBAP1_TC417172	0.665527	3.04444	22.2485	2.39542e-06	0.000159915
NM_001086813.1	-0.591649	4.35078	22.2435	2.40173e-06	0.000159915
PHPT1_Taira201203_XENLA_stage_00047966	0.808169	2.38929	22.2288	2.42015e-06	0.000160637
PPP1R10_Kwon201107_XENLA_00038301	-0.570348	5.96595	22.2211	2.42985e-06	0.000160779
HES1_TC421852	-0.646566	3.66996	22.1778	2.48537e-06	0.000163612
BC124857.1	-0.927151	1.36819	22.1757	2.48807e-06	0.000163612
GPRC5B_TeperekTkacz201202_XENLA_00003773	-0.668069	5.20095	22.1576	2.51153e-06	0.00016456
MED23_Taira201203_XENLA_stage_00159144	-0.485811	6.39843	22.1527	2.51799e-06	0.00016456
EN1_Taira201203_XENLA_stage_00166115	-1.0124	0.656744	22.1442	2.52925e-06	0.000164789
C11ORF58_TeperekTkacz201202_XENLA_00013604	-0.495243	6.01398	22.1311	2.54647e-06	0.000165403
WRN_Kwon201107_XENLA_00062665	-0.535331	6.45368	22.1074	2.5782e-06	0.000166522
CLDN11_Ismailoglu201203_XENLA_00021368	-0.745436	2.50846	22.1065	2.57937e-06	0.000166522
NM_001091312.1	-0.720021	3.62289	22.0758	2.62099e-06	0.000168697
TTF1_Taira201203_XENLA_stage_00191291	-0.449023	7.99264	22.0532	2.65203e-06	0.000170179
SLC46A1_Kwon201107_XENLA_00067971	0.82183	1.86391	21.9918	2.73825e-06	0.000175182
NA_XeXenL6RMv10045142m	-0.613518	4.3813	21.9782	2.75766e-06	0.000175894
USP49_Ismailoglu201203_XENLA_00063910	-0.663528	5.40325	21.9724	2.76602e-06	0.000175899
SHROOM4_Quigley201112_XENLA_00046413	-0.588027	6.40153	21.9599	2.78408e-06	0.000176519
NM_001086769.1	-0.729253	2.71467	21.9386	2.81516e-06	0.000177959
TMEM150B_Ismailoglu201203_XENLA_00070536	-0.750101	3.19701	21.9169	2.84713e-06	0.000179445
NM_001086345.1	-0.686316	7.03646	21.8671	2.92204e-06	0.000183622
RCOR2_Taira201203_XENLA_stage_00195882	-0.539421	5.45446	21.8344	2.97217e-06	0.000186221
NM_001089775.1	-0.590946	5.31394	21.8073	3.01456e-06	0.000188321
NA_Taira201203_XENLA_stage_00072193	0.753561	3.23263	21.801	3.02439e-06	0.000188381
RAB11FIP4L_Taira201203_XENLA_tissue_00207102	-0.638301	3.50395	21.7565	3.09541e-06	0.000192241
KIAA1549_Taira201203_XENLA_tissue_00144894	-1.26375	0.136169	21.7336	3.1326e-06	0.000193984
NA_Horb201201_XENLA_00162365	-0.724073	5.24957	21.7175	3.15891e-06	0.000195044
INTS5_XeXenL6RMv10037843m	-0.653386	4.39765	21.7075	3.17553e-06	0.000195502
MYOD1_Taira201203_XENLA_tissue_00232010	-0.774498	4.78347	21.5956	3.36628e-06	0.000206647
FBXL19_TeperekTkacz201206_XENLA_00004060	-0.670882	3.70203	21.5636	3.42286e-06	0.000209515
ZNF740_Taira201203_XENLA_stage_00162046	-0.621051	6.28825	21.5559	3.43671e-06	0.000209758
CENPC1_Taira201203_XENLA_tissue_00287659	-0.620363	4.5218	21.483	3.56973e-06	0.000217252
DQ096839.1	-0.491479	7.49745	21.4621	3.60885e-06	0.000218524
PFKFB3_Kwon201107_XENLA_00101455	0.444938	7.50731	21.4609	3.61121e-06	0.000218524
CBX1_TeperekTkacz201206_XENLA_00048060	-0.740565	2.87577	21.4446	3.64208e-06	0.000219767
SPRY4_XeXenL6RMv10030390m	-0.889307	2.57781	21.4071	3.71401e-06	0.000223472
MYL9_XeXenL6RMv10003610m	-0.526618	5.03641	21.3967	3.73414e-06	0.000224049
BC089275.1	-0.65283	3.47029	21.3835	3.75993e-06	0.00022496
C20ORF151_Quigley201112_XENLA_00093004	-0.916345	3.64661	21.3205	3.88546e-06	0.000231818
PHF21B_Quigley201207_XENLA_00101274	-0.754045	3.37519	21.3139	3.89892e-06	0.000231969
NM_001096708.1	1.16259	0.771587	21.2252	4.08357e-06	0.000242277
PHLDB1_Ismailoglu201203_XENLA_00039150	-0.734566	5.42599	21.2183	4.09823e-06	0.000242469
ADAMTS5_Taira201203_XENLA_tissue_00232178	-1.555	-0.661282	21.2098	4.11644e-06	0.000242515
XKR7_XeXenL6RMv10007792m	-0.566029	4.85402	21.2073	4.12184e-06	0.000242515
MAK16_Ismailoglu201203_XENLA_00056248	-0.471734	6.86017	21.1851	4.16998e-06	0.00024467
NM_001086424.1	-0.567633	4.90363	21.1581	4.22906e-06	0.000247453
PRICKLE2_Ismailoglu201203_XENLA_00026662	-0.790361	3.95761	21.1464	4.2549e-06	0.00024828
F6TRJ6_XENTR_XeXenL6RMv10040341m	-0.733029	4.32563	21.0976	4.36482e-06	0.00025333
SLC44A3_Taira201203_XENLA_tissue_00252806	-1.07369	2.08652	21.0974	4.36529e-06	0.00025333
NM_001094604.1	-0.544344	5.10308	21.0765	4.41317e-06	0.000254727
SOX9_Quigley201112_XENLA_00084848	-0.752996	4.317	21.0764	4.41335e-06	0.000254727
BC072188.1	-0.74144	2.44729	21.0656	4.43819e-06	0.000255067
APEH_Quigley201207_XENLA_00027267	-1.05496	2.0617	21.0634	4.44327e-06	0.000255067
NA_XeXenL6RMv10038731m	-0.650521	4.74573	21.0468	4.48207e-06	0.000256601
GSS_Taira201203_XENLA_tissue_00280150	-0.681262	3.14499	21.0399	4.49823e-06	0.000256834
NM_001091687.1	-0.785767	5.22669	21.0287	4.52453e-06	0.000257644
RRAS_Audic201207_XENLA_00002111	-0.723042	2.75736	21.0054	4.57981e-06	0.000260094
SLC17A9_Taira201203_XENLA_stage_00093098	-0.88184	3.1467	20.9898	4.61744e-06	0.000261532
NM_001093696.1	-0.76753	4.61714	20.8685	4.91905e-06	0.000277874
BC045272.1	0.493449	6.61606	20.8603	4.94018e-06	0.000278327
HS3ST3A1_TC420639	-0.642165	4.10139	20.8496	4.96804e-06	0.000279157
WNT7A_Taira201203_XENLA_tissue_00169413	-1.86584	-1.47361	20.8152	5.05792e-06	0.000283457
CA14_Taira201203_XENLA_tissue_00109123	-0.763191	2.59048	20.8065	5.08105e-06	0.000284004
XKR7_XeXenL6RMv10003841m	-0.861251	1.91529	20.7429	5.25249e-06	0.000292816
ESR-5_Taira201203_XENLA_tissue_00272077	-0.573678	5.25212	20.7356	5.27262e-06	0.000293169
UBL3_Park201106_XENLA_00087787	0.541666	4.8773	20.6933	5.39037e-06	0.000298346
FBXW4_Quigley201207_XENLA_00106673	-0.643664	3.14025	20.6921	5.39383e-06	0.000298346
CDC34_XeXenL6RMv10016829m	-0.634816	7.32145	20.6347	5.55799e-06	0.000306628
TUBB2C_TC420595	-0.46013	6.69019	20.5519	5.80376e-06	0.000319357
UPP2_TeperekTkacz201202_XENLA_00104215	-0.860985	3.40783	20.5291	5.87309e-06	0.000321532
PPL_XeXenL6RMv10015467m	-0.818	4.00064	20.529	5.87356e-06	0.000321532
NM_001086595.1	-0.581426	8.41517	20.4884	5.99948e-06	0.000327581
NM_001091261.1	-0.429178	7.27675	20.479	6.02899e-06	0.000328348
GPN3_Kwon201107_XENLA_00131953	-0.489302	6.71498	20.465	6.07303e-06	0.0003299
NA_XeXenL6RMv10052255m	-0.581367	6.16858	20.4583	6.09455e-06	0.000330225
ETAA1_XeXenL6RMv10022008m	-0.569851	5.03246	20.3848	6.33313e-06	0.000342275
NM_001092450.1	0.637055	3.14209	20.3799	6.34917e-06	0.000342275
SART3_Audic201207_XENLA_00003545	-0.479259	6.19518	20.3568	6.42626e-06	0.000345554
TMPRSS9_Taira201203_XENLA_stage_00180906	-0.989921	1.3643	20.3342	6.50271e-06	0.000348782
ZXDC_Taira201203_XENLA_stage_00183740	-0.595433	3.81131	20.319	6.55466e-06	0.000350682
TRIM67_Ismailoglu201203_XENLA_00046035	-0.625093	5.3907	20.3122	6.57782e-06	0.000351037
GPANK1_Taira201203_XENLA_stage_00003997	-0.982448	0.781037	20.2633	6.74822e-06	0.000359229
NM_001096274.1	-0.55232	4.27895	20.2303	6.86556e-06	0.000364561
TTC31_Taira201203_XENLA_tissue_00194665	0.726921	3.15405	20.1756	7.06496e-06	0.000374214
LSM4_Taira201203_XENLA_tissue_00080528	-0.803042	2.19753	20.1416	7.19144e-06	0.000379966
KIAA0494_Taira201203_XENLA_stage_00033326	0.614602	3.53289	19.9982	7.7517e-06	0.000408551
KDM5B_Ismailoglu201203_XENLA_00019836	-0.463455	7.25968	19.9605	7.90566e-06	0.000415634
NM_001095460.1	-0.516774	5.57004	19.9452	7.96925e-06	0.000417943
ENC1.2_Taira201203_XENLA_stage_00052113	-0.651493	5.18037	19.8573	8.34448e-06	0.000436544
NM_001174008.1	0.806234	1.97247	19.7882	8.65146e-06	0.000451491
PHLDB1_Taira201203_XENLA_tissue_00200637	-0.644253	5.95061	19.7824	8.67799e-06	0.000451766
NA_Taira201203_XENLA_tissue_00071789	-0.6573	4.30027	19.7675	8.74571e-06	0.000454178
AXIN2_Taira201203_XENLA_tissue_00022037	-0.886489	6.00127	19.7622	8.76995e-06	0.000454326
NA_Taira201203_XENLA_tissue_00078973	-0.595501	6.94489	19.6938	9.08956e-06	0.00046867
CCNF_Kwon201107_XENLA_00121218	-0.477779	5.56821	19.6935	9.09096e-06	0.00046867
NM_001096127.1	-0.567763	6.18158	19.6765	9.17228e-06	0.000471299
CLCN3_Kwon201107_XENLA_00072492	-0.495358	5.35155	19.6736	9.18633e-06	0.000471299
NM_001246316.1	1.69673	1.30155	19.6482	9.30889e-06	0.000475107
ZMYM4_Taira201203_XENLA_stage_00164638	-0.440315	7.19729	19.6465	9.31719e-06	0.000475107
PAPOLG_Taira201203_XENLA_stage_00061501	-0.562221	5.30113	19.6444	9.32767e-06	0.000475107
AM419010.1	-0.705435	2.43711	19.5825	9.63461e-06	0.000489567
COL17A1_TeperekTkacz201202_XENLA_00120867	-1.06042	3.11899	19.5609	9.74451e-06	0.00049397
NA_XeXenL6RMv10008379m	-0.942161	1.85611	19.4967	1.00775e-05	0.000509631
HNF4A_XeXenL6RMv10008140m	-1.05427	1.52444	19.4848	1.01405e-05	0.000510836
NPTX2_XeXenL6RMv10032962m	-0.861478	3.03006	19.4831	1.01494e-05	0.000510836
NM_001094747.1	-0.676234	7.25958	19.4525	1.03134e-05	0.000516419
NM_001086983.1	-0.790338	5.30547	19.4512	1.03204e-05	0.000516419
NM_001091094.1	-0.456258	7.0208	19.4488	1.03332e-05	0.000516419
BC110970.1	-0.554144	5.71499	19.4433	1.0363e-05	0.00051669
C8G_Taira201203_XENLA_stage_00104479	-1.10376	2.77241	19.4282	1.04456e-05	0.000519589
BC100162.1	-0.55205	7.37821	19.3905	1.06537e-05	0.000528705
WNT10A_Taira201203_XENLA_tissue_00051230	1.77017	-0.940819	19.3727	1.07532e-05	0.000532396
KCTD10_mgEST_Xl4jul2012_1013254109	-0.481393	5.61811	19.3374	1.09538e-05	0.000541067
ZBTB12_Kwon201107_XENLA_00125670	-0.537589	5.06449	19.3144	1.10866e-05	0.000546355
WAC_Taira201203_XENLA_tissue_00014432	-0.516642	6.25028	19.2977	1.11841e-05	0.000549734
TIGD3_Taira201203_XENLA_stage_00149303	-0.898767	1.46372	19.2938	1.12069e-05	0.000549734
NM_001087201.1	-0.612631	3.91992	19.2702	1.13464e-05	0.000555296
ARL4C_Taira201203_XENLA_tissue_00267617	-0.631592	4.07206	19.2059	1.17351e-05	0.000572082
NM_001094369.1	-0.59745	4.2845	19.2006	1.17675e-05	0.000572082
BC070556.1	-0.6262	6.22438	19.2002	1.17702e-05	0.000572082
FANCF_TC421308	-0.834938	1.31585	19.1851	1.18633e-05	0.00057529
BC063270.1	-0.430228	6.63845	19.1518	1.20724e-05	0.000582918
NA_XeXenL6RMv10031970m	-1.23555	2.06594	19.1513	1.20755e-05	0.000582918
GATAD2A_Park201106_XENLA_00022643	-0.571503	5.20871	19.1291	1.22167e-05	0.000588397
HMOX1_Park201106_XENLA_00018974	-0.450953	6.76305	19.117	1.22948e-05	0.000590284
TAF5L_Taira201203_XENLA_stage_00092094	0.560512	4.53487	19.1144	1.23115e-05	0.000590284
FAM83G_Park201106_XENLA_00032339	0.635537	2.8728	19.095	1.24371e-05	0.000593881
ANKRD13C_XeXenL6RMv10003397m	0.516303	5.02309	19.0942	1.24424e-05	0.000593881
FICD_Taira201203_XENLA_tissue_00028369	-0.597649	3.89674	18.9865	1.31644e-05	0.000626932
NM_001114788.1	-0.568797	3.89031	18.9728	1.32598e-05	0.000630063
NA_Ismailoglu201203_XENLA_00021295	-0.610952	4.61873	18.91	1.37032e-05	0.000649679
NT5C1B_Taira201203_XENLA_stage_00005535	-1.03905	3.22237	18.8899	1.38487e-05	0.000655115
CRABP2_Taira201203_XENLA_stage_00059187	-0.719474	2.64422	18.8769	1.39428e-05	0.000658102
KIAA0182_Taira201203_XENLA_tissue_00020671	-0.457644	6.24209	18.8557	1.40989e-05	0.000662694
ST6GALNAC2_Horb201201_XENLA_00171717	-0.563165	4.89082	18.8516	1.41294e-05	0.000662694
CAPN13_Taira201203_XENLA_stage_00116462	-0.76118	3.22051	18.851	1.41337e-05	0.000662694
KPNA2_Taira201203_XENLA_stage_00049077	-0.475185	6.7279	18.8096	1.44437e-05	0.000675736
BC146639.1	-0.887021	6.03594	18.7865	1.46202e-05	0.000682488
NM_001091056.1	-0.53782	6.65134	18.7675	1.47666e-05	0.000687812
PRR12_Taira201203_XENLA_stage_00050352	-0.479358	5.99947	18.7399	1.49813e-05	0.000696284
OLIG2_XeXenL6RMv10027066m	-1.23676	-0.101341	18.68	1.54597e-05	0.000716954
NM_001087765.1	-0.728178	5.56027	18.6532	1.56785e-05	0.000725513
PLEKHG5_Ismailoglu201203_XENLA_00066558	0.505104	5.88032	18.6221	1.59363e-05	0.000735841
NM_001087224.1	0.599358	3.41529	18.6161	1.59868e-05	0.000736573
BCKDK_Taira201203_XENLA_tissue_00009790	-0.443039	6.66866	18.6003	1.61193e-05	0.000740723
F7C1U7_XENTR_Ismailoglu201203_XENLA_00030627	-0.684917	3.48661	18.5956	1.6159e-05	0.000740723
PRDM10_Taira201203_XENLA_stage_00137310	-0.616386	3.96545	18.593	1.61815e-05	0.000740723
NA_Kwon201107_XENLA_00051907	-1.34728	-0.380026	18.5843	1.62551e-05	0.000742493
FZD6_Taira201203_XENLA_tissue_00224405	-0.631935	5.11229	18.5757	1.63292e-05	0.000744276
NM_001094523.1	-0.577216	3.90826	18.5524	1.65298e-05	0.000751805
NOP10_Kwon201107_XENLA_00086227	-0.446683	6.43668	18.5444	1.6599e-05	0.00075334
CTF1_Taira201203_XENLA_stage_00037290	-0.405204	8.22829	18.5374	1.66606e-05	0.000754521
BC077744.1	-0.736576	1.89748	18.5007	1.69846e-05	0.000767559
COASY_Ismailoglu201203_XENLA_00028760	0.549209	4.41435	18.4507	1.74361e-05	0.000786291
CCDC37_Quigley201207_XENLA_00006512	-0.757409	3.22939	18.4321	1.76066e-05	0.000792299
BC133178.1	-0.811797	1.49434	18.4208	1.7711e-05	0.000795308
C12ORF63_Ismailoglu201203_XENLA_00065360	0.983265	1.36677	18.4033	1.78749e-05	0.000800979
FAM18B1_Taira201203_XENLA_stage_00019825	-1.18745	-0.482415	18.3886	1.80133e-05	0.000804038
KCTD15_Taira201203_XENLA_tissue_00160732	-0.672182	3.82265	18.388	1.80189e-05	0.000804038
NRSN1_Taira201203_XENLA_tissue_00124914	0.842895	4.28773	18.3782	1.8112e-05	0.000804643
BC157491.1	-0.491557	6.63935	18.3776	1.81178e-05	0.000804643
GLRX2_Taira201203_XENLA_stage_00134041	-0.524976	4.90291	18.3746	1.81461e-05	0.000804643
SLC30A10_Taira201203_XENLA_tissue_00269763	-0.81617	4.35793	18.3631	1.82563e-05	0.000807843
MCM5_Quigley201207_XENLA_00075980	-0.429684	6.62131	18.3575	1.831e-05	0.000808534
SURF6_Taira201203_XENLA_stage_00184070	-0.500992	6.23558	18.3533	1.83497e-05	0.000808603
DST_Taira201203_XENLA_tissue_00144636	0.993522	2.42107	18.3437	1.84431e-05	0.000811039
GALNT7_Taira201203_XENLA_tissue_00059014	-0.604469	5.33096	18.2719	1.91509e-05	0.000840422
NM_001094037.1	0.638926	2.69971	18.2211	1.96688e-05	0.000860666
CAB39_TeperekTkacz201206_XENLA_00086305	0.603444	3.07031	18.2187	1.96932e-05	0.000860666
HIPK2_TeperekTkacz201206_XENLA_00130472	-0.492752	5.81665	18.202	1.98672e-05	0.000866488
GJB3_Taira201203_XENLA_stage_00199497	-1.12889	0.394321	18.1798	2.01003e-05	0.00087311
COL17A1_Quigley201207_XENLA_00041639	-0.918823	3.36306	18.1797	2.01013e-05	0.00087311
CHMP2A_Ismailoglu201203_XENLA_00027920	-0.405483	7.08666	18.1338	2.05918e-05	0.000892192
SLC30A9_XeXenL6RMv10039788m	0.633986	2.60127	18.1307	2.06246e-05	0.000892192
NM_001122875.1	-0.49876	5.64845	18.1099	2.08512e-05	0.000899304
ZBTB46_Taira201203_XENLA_tissue_00068502	-0.680933	2.84674	18.1047	2.09088e-05	0.000899304
AFAP1L2_Taira201203_XENLA_tissue_00045730	-0.719385	2.88112	18.104	2.0916e-05	0.000899304
NM_001097088.1	0.505937	5.00366	18.0867	2.11066e-05	0.000905665
HMG20A_Taira201203_XENLA_stage_00109175	-0.836867	1.19792	18.0827	2.11516e-05	0.000905765
CHMP1B_Kwon201107_XENLA_00008541	-0.649676	4.56927	18.071	2.12813e-05	0.000909486
NM_001092086.1	-0.511401	4.68598	18.0435	2.1591e-05	0.000920869
FOSL2_Taira201203_XENLA_tissue_00235780	-0.545785	5.11607	18.0168	2.18967e-05	0.000932036
CCDC111_Ismailoglu201203_XENLA_00030748	-0.632375	3.74599	17.9966	2.21296e-05	0.000940066
USP6NL_Taira201203_XENLA_tissue_00135639	0.603246	2.9087	17.9691	2.24526e-05	0.000951882
NP_001093736.1_TC452162	-0.912436	0.565113	17.9534	2.26385e-05	0.000957852
USPL1_Ismailoglu201203_XENLA_00068688	0.606604	3.56654	17.9319	2.28957e-05	0.000964934
SLC23A2_Taira201203_XENLA_stage_00042070	-0.700674	3.89	17.926	2.29662e-05	0.000964934
CDC7_Taira201203_XENLA_stage_00075681	-0.706337	2.08143	17.9254	2.2973e-05	0.000964934
BPNT1_XeXenL6RMv10029821m	-0.513211	5.91759	17.9242	2.29876e-05	0.000964934
NM_001088949.1	-0.467038	7.54928	17.9173	2.30716e-05	0.000965389
ARHGAP35_Taira201203_XENLA_stage_00183480	0.466612	5.70672	17.9158	2.30893e-05	0.000965389
TMPRSS9_XeXenL6RMv10028005m	-0.870465	1.59158	17.906	2.32085e-05	0.000968466
RAB11FIP4_Taira201203_XENLA_tissue_00225887	-1.04949	0.351569	17.8431	2.39891e-05	0.000999075
SRSF10_Ismailoglu201203_XENLA_00027447	-0.495339	5.40065	17.8366	2.40704e-05	0.0010005
C2CD3_XeXenL6RMv10029281m	0.65607	2.60653	17.8212	2.42658e-05	0.00100665
NM_001092351.1	-0.819227	2.05781	17.8079	2.44371e-05	0.00101178
CREB3L4_Taira201203_XENLA_tissue_00069676	-0.676504	2.75847	17.7842	2.47432e-05	0.00102025
NM_001090234.1	-0.954923	1.99696	17.7824	2.47657e-05	0.00102025
NA_TC425575	0.544527	5.70314	17.7809	2.47858e-05	0.00102025
C2ORF63_Quigley201207_XENLA_00040172	-0.772288	2.16975	17.7624	2.5028e-05	0.00102823
GPRC5C_Ismailoglu201203_XENLA_00043485	-0.680855	4.32154	17.7521	2.51642e-05	0.00103183
SLC30A10_Kwon201107_XENLA_00033105	-1.21359	-0.393303	17.7372	2.53616e-05	0.00103792
NA_TC457647	-0.654231	2.74613	17.7163	2.56424e-05	0.00104739
ARHGAP39_Taira201203_XENLA_stage_00027608	-0.492954	6.44523	17.6867	2.60435e-05	0.00106079
IFRD1_TC415934	-0.562444	4.93825	17.6848	2.60702e-05	0.00106079
NM_001086627.1	-0.446719	8.84545	17.6772	2.61739e-05	0.00106297
ZNF217_Ismailoglu201203_XENLA_00052660	-0.51048	4.94218	17.6478	2.65819e-05	0.00107748
RPL8_Taira201203_XENLA_stage_00004792	-0.855584	0.944705	17.6308	2.68204e-05	0.00108508
NM_001096383.1	-0.457413	9.31325	17.6151	2.70432e-05	0.00109093
C12ORF43_XeXenL6RMv10007022m	-0.741774	1.80854	17.6134	2.70679e-05	0.00109093
SLC39A13_Taira201203_XENLA_stage_00084226	-0.5661	3.57058	17.5906	2.73943e-05	0.001102
NRBF2_Ismailoglu201203_XENLA_00011835	1.35621	-0.453028	17.5761	2.76042e-05	0.00110834
AKNA_Taira201203_XENLA_tissue_00087627	-0.979399	0.557463	17.5684	2.77156e-05	0.00111072
NM_001095378.1	-0.656269	2.6285	17.5503	2.79806e-05	0.00111922
BC042280.1	-0.486605	5.09582	17.4869	2.8929e-05	0.00115423
CEP19_Quigley201207_XENLA_00070696	-0.480968	5.34652	17.4846	2.89645e-05	0.00115423
NM_001096070.1	0.96284	3.58553	17.371	3.0749e-05	0.00122194
PMPCA_Quigley201207_XENLA_00031365	-0.418783	6.39288	17.3666	3.08188e-05	0.00122194
ETV6_Taira201203_XENLA_stage_00197969	-0.53319	4.72982	17.3656	3.08361e-05	0.00122194
NA_Taira201203_XENLA_stage_00074988	-0.829074	1.98239	17.335	3.13356e-05	0.00123829
NM_001091958.1	-0.635962	3.65373	17.3332	3.13655e-05	0.00123829
LSM11_Taira201203_XENLA_stage_00020190	-0.996314	0.831118	17.3067	3.18069e-05	0.00125143
BC106685.1	-0.972503	0.530542	17.3034	3.18611e-05	0.00125143
CASP8AP2_Kwon201107_XENLA_00129217	-0.618857	2.80656	17.3026	3.18753e-05	0.00125143
USP54_Kwon201107_XENLA_00118132	-0.480053	6.03127	17.2959	3.19874e-05	0.00125143
NM_001122696.1	-0.468409	5.47112	17.2956	3.19928e-05	0.00125143
FAM35A_Kwon201107_XENLA_00122499	-0.694694	2.13267	17.2792	3.22702e-05	0.00125996
CYP27C1_Ismailoglu201203_XENLA_00045032	-0.470493	7.62341	17.2142	3.33939e-05	0.00130018
CASP8AP2_Taira201203_XENLA_tissue_00263155	-0.632273	3.22842	17.2042	3.35685e-05	0.00130018
NM_001097911.1	-0.634163	4.84163	17.2011	3.36239e-05	0.00130018
EU124653.1	-0.680539	3.72407	17.1983	3.36736e-05	0.00130018
RAB32_XeXenL6RMv10046236m	1.40717	-0.602949	17.1982	3.3675e-05	0.00130018
FAM167A_Taira201203_XENLA_stage_00095701	0.713296	2.25411	17.1953	3.37273e-05	0.00130018
UIMC1_Quigley201112_XENLA_00021606	-0.85001	1.13794	17.1952	3.37288e-05	0.00130018
CHD3_Ismailoglu201203_XENLA_00000455	-0.45909	7.65341	17.1912	3.37997e-05	0.00130055
NM_001090002.1	-0.744676	3.86602	17.1754	3.40821e-05	0.00130905
NM_001085591.1	-1.20086	0.221452	17.1668	3.4237e-05	0.00131262
RGS19_Taira201203_XENLA_stage_00018806	-0.561328	4.02788	17.1593	3.43725e-05	0.00131545
AFF4_Quigley201207_XENLA_00034604	-0.623485	3.98919	17.136	3.47971e-05	0.00132711
NM_001088092.1	0.660405	2.26721	17.1357	3.48022e-05	0.00132711
WNT11_TeperekTkacz201206_XENLA_00080447	-0.794739	2.34943	17.1294	3.49175e-05	0.00132912
PHF6_Taira201203_XENLA_stage_00124371	0.513328	4.47024	17.093	3.55941e-05	0.00135245
NA_Taira201203_XENLA_tissue_00166679	-0.913884	1.9826	17.0826	3.57891e-05	0.00135743
NA_Ismailoglu201203_XENLA_00068288	-0.525723	4.64749	17.0727	3.59761e-05	0.00136209
DQ096883.1	-0.454245	5.62874	17.06	3.6217e-05	0.00136641
DENND2A_XeXenL6RMv10046866m	-0.995457	1.23906	17.0599	3.6219e-05	0.00136641
RAI14_Park201106_XENLA_00159968	-0.675909	3.38276	17.0361	3.66758e-05	0.00138119
CCDC104_Quigley201207_XENLA_00043737	-0.550239	3.9068	17.0063	3.72553e-05	0.00140054
ZFP36L2_Taira201203_XENLA_stage_00153001	-0.439021	6.97302	16.996	3.74583e-05	0.00140568
USP1_Taira201203_XENLA_stage_00202938	-0.484779	5.6375	16.9883	3.76103e-05	0.0014089
ACVR1B_Quigley201207_XENLA_00012309	0.536915	4.66616	16.9084	3.92284e-05	0.00146692
NA_Kwon201107_XENLA_00050203	-0.576056	4.05343	16.8832	3.97529e-05	0.00148195
TMEM116_Taira201203_XENLA_stage_00086462	-0.654672	2.89953	16.8823	3.97699e-05	0.00148195
HSPA5_Kwon201107_XENLA_00060042	-0.459896	6.15194	16.8669	4.00945e-05	0.00149143
NA_Amin201106_XENLA_00097857	-1.27992	-0.149018	16.8502	4.04485e-05	0.00150197
NM_001093271.1	0.602243	3.54784	16.8327	4.08232e-05	0.00151235
RAB11FIP2_Taira201203_XENLA_tissue_00084901	-0.586836	4.71656	16.8275	4.09362e-05	0.00151235
SIK3_Park201106_XENLA_00084429	-0.562882	4.29621	16.8256	4.09774e-05	0.00151235
WDFY2_Taira201203_XENLA_tissue_00232146	0.769805	1.80478	16.8239	4.1013e-05	0.00151235
PRICKLE2_XeXenL6RMv10027680m	-0.674928	2.54542	16.8166	4.11706e-05	0.00151554
RBM6_Quigley201207_XENLA_00117327	-0.409818	6.77655	16.7834	4.1898e-05	0.00153724
NA_Kwon201107_XENLA_00103357	-0.998423	1.14976	16.7831	4.1905e-05	0.00153724
PRC1.2_Ismailoglu201203_XENLA_00040162	-0.45941	5.63002	16.7688	4.22216e-05	0.00154618
TRIM36_Taira201203_XENLA_tissue_00290119	-0.500432	4.93729	16.762	4.23741e-05	0.0015491
HKDC1_XeXenL6RMv10003090m	-0.724358	4.40425	16.7172	4.33869e-05	0.0015834
NM_001094965.1	0.532736	4.14245	16.7063	4.36367e-05	0.00158978
DENND2A_Park201106_XENLA_00110761	-0.749084	4.0107	16.6662	4.45672e-05	0.0016209
ABLIM1_Taira201203_XENLA_tissue_00043731	-0.593659	5.91435	16.6329	4.53582e-05	0.00164685
CASC4_Taira201203_XENLA_stage_00194363	-0.625925	4.50988	16.6132	4.58319e-05	0.00165714
NM_001085796.1	1.16404	1.07789	16.6111	4.58828e-05	0.00165714
INTS5_Amin201106_XENLA_00063018	-0.557513	3.69943	16.6098	4.5912e-05	0.00165714
NP_001120543.1_Taira201203_XENLA_stage_00016916	-0.54309	5.75285	16.605	4.60291e-05	0.00165714
NA_TeperekTkacz201202_XENLA_00148454	-1.05842	0.933342	16.6049	4.60318e-05	0.00165714
BC142583.1	-0.557902	5.91795	16.5987	4.6183e-05	0.00165977
ACAP3_Taira201203_XENLA_stage_00045015	-0.683457	4.14192	16.5869	4.647e-05	0.00166548
WDR12_XeXenL6RMv10042759m	-0.472972	5.61534	16.5846	4.65272e-05	0.00166548
FAM57A_Amin201106_XENLA_00081201	-0.715128	1.85178	16.5826	4.65771e-05	0.00166548
TGIF1_Quigley201207_XENLA_00007756	0.485923	5.92652	16.5557	4.72408e-05	0.00168638
NA_TeperekTkacz201206_XENLA_00067407	-0.625625	5.19809	16.5484	4.7423e-05	0.00168837
NM_001088975.1	-0.676686	5.16428	16.5471	4.74557e-05	0.00168837
ARHGAP28_Taira201203_XENLA_stage_00191767	0.729824	2.61411	16.505	4.85215e-05	0.0017234
RNF146_Taira201203_XENLA_stage_00072013	-0.451842	5.97929	16.4973	4.8719e-05	0.00172753
NA_TeperekTkacz201206_XENLA_00104610	-0.786567	1.47782	16.4934	4.8821e-05	0.00172826
LRRN1_Quigley201207_XENLA_00097977	-0.524355	6.74685	16.4888	4.89384e-05	0.00172954
SMARCE1_XeXenL6RMv10008483m	-0.442932	5.67675	16.4832	4.90833e-05	0.00173178
NA_Park201106_XENLA_00132878	-0.635453	3.23247	16.4792	4.91856e-05	0.00173251
SLC30A2_Kwon201107_XENLA_00116675	-0.415543	6.80745	16.4622	4.96286e-05	0.00174522
FST_Taira201203_XENLA_stage_00085585	-0.732794	2.79179	16.4533	4.98643e-05	0.00174997
NM_001097682.1	0.522892	4.75704	16.4508	4.99284e-05	0.00174997
YIPF6_Taira201203_XENLA_stage_00117608	-0.591015	5.2097	16.4278	5.05389e-05	0.00176845
TOPBP1_Taira201203_XENLA_stage_00044099	-0.526612	4.32112	16.3821	5.17713e-05	0.0018062
UBE3A_Taira201203_XENLA_stage_00203228	0.837452	0.819452	16.3792	5.18503e-05	0.0018062
VENTX3.2_TeperekTkacz201206_XENLA_00045974	0.886034	1.18818	16.3784	5.18729e-05	0.0018062
RBM38_Quigley201207_XENLA_00008460	-0.616627	5.0311	16.364	5.22697e-05	0.00181703
ELMO1_TeperekTkacz201202_XENLA_00138404	-0.541363	4.49539	16.3351	5.30726e-05	0.00184193
ARHGAP33_Taira201203_XENLA_tissue_00179920	-0.672911	2.6931	16.3053	5.39121e-05	0.00186519
LMO3_XeXenL6RMv10004245m	-0.831633	2.36406	16.3051	5.39185e-05	0.00186519
NM_001127838.1	-0.444728	6.81564	16.2941	5.42317e-05	0.00187298
TGFBR1_Taira201203_XENLA_tissue_00165929	-0.658486	2.72167	16.2763	5.4745e-05	0.00188764
BC142578.1	-0.483073	6.13634	16.2692	5.49497e-05	0.00189162
AFAP1L2_Horb201201_XENLA_00087799	-0.728467	2.05153	16.233	5.60099e-05	0.001925
CKMT1B_Taira201203_XENLA_stage_00069915	-0.815405	3.91092	16.1945	5.71588e-05	0.00195894
TCF3_Taira201203_XENLA_stage_00133489	-0.490351	7.28534	16.1938	5.71818e-05	0.00195894
BC142543.1	-0.484616	4.79038	16.1686	5.79469e-05	0.00198019
ZNF503_Ismailoglu201203_XENLA_00016126	-0.64076	3.41825	16.1672	5.79885e-05	0.00198019
NA_Quigley201112_XENLA_00093568	-0.588775	4.33474	16.1585	5.82558e-05	0.00198612
LIMA1_Taira201203_XENLA_tissue_00105923	-0.450504	5.3387	16.1547	5.83744e-05	0.00198698
PDE8A_XeXenL6RMv10001215m	1.21718	-0.33836	16.1456	5.86552e-05	0.00199334
CEP152_XeXenL6RMv10042613m	-0.803564	1.09582	16.1399	5.88312e-05	0.00199613
LRP2_Quigley201112_XENLA_00120653	-0.672609	3.77809	16.1326	5.90589e-05	0.00200066
NA_Taira201203_XENLA_stage_00021155	-0.647606	2.36191	16.1242	5.93201e-05	0.00200403
SCAF1_Taira201203_XENLA_tissue_00010076	-0.498144	5.20293	16.1234	5.93471e-05	0.00200403
NM_001096128.1	0.520809	3.92772	16.1151	5.96077e-05	0.00200963
NM_001090821.1	-0.46128	6.70043	16.0585	6.14163e-05	0.00206733
ASTE1_Taira201203_XENLA_stage_00022186	0.500937	4.46454	16.0214	6.26319e-05	0.00210491
SFRPX_Taira201203_XENLA_tissue_00126173	-0.675843	2.65166	15.971	6.43208e-05	0.00215825
DDX47_XeXenL6RMv10023605m	-0.419945	6.65756	15.9635	6.45767e-05	0.00216342
CA8_Park201106_XENLA_00008890	-1.25837	0.0872644	15.9387	6.54267e-05	0.00218845
2410127L17RIK_Taira201203_XENLA_stage_00100181	-0.991894	0.205541	15.9213	6.60319e-05	0.00220522
TMEM150B_Taira201203_XENLA_tissue_00070606	-0.564021	3.82389	15.8713	6.77993e-05	0.00226069
NM_001092423.1	-0.526686	3.92652	15.8471	6.86705e-05	0.00228258
NA_Taira201203_XENLA_tissue_00062640	-0.623291	4.87177	15.8471	6.8671e-05	0.00228258
FASTKD5_Ismailoglu201203_XENLA_00026441	0.6571	3.7663	15.8168	6.9779e-05	0.00231579
TRDMT1_Taira201203_XENLA_stage_00069901	-0.587082	3.47427	15.8046	7.02303e-05	0.00232713
ATP11C_Taira201203_XENLA_tissue_00051932	0.670598	3.82497	15.798	7.04758e-05	0.00233163
DQ096896.1	-0.616313	3.5614	15.7948	7.05971e-05	0.00233201
FBXO5_Taira201203_XENLA_stage_00019536	-0.514398	5.86359	15.7874	7.08721e-05	0.00233746
ARFGEF1_Ismailoglu201203_XENLA_00063402	0.514181	4.64232	15.781	7.11143e-05	0.00234181
VSIG8_Chung201110_XENLA_00010375	-1.04198	1.61386	15.7554	7.20815e-05	0.00236999
EMILIN2_Taira201203_XENLA_tissue_00043921	-0.948723	0.698893	15.7212	7.33965e-05	0.00240949
CDC25C_Ismailoglu201203_XENLA_00006370	-0.38666	7.25954	15.7105	7.38144e-05	0.00241947
CPSF3_Taira201203_XENLA_tissue_00047839	-0.443056	5.78319	15.6986	7.42798e-05	0.00242914
WDR66_Taira201203_XENLA_stage_00061875	-1.11329	1.06387	15.6971	7.43382e-05	0.00242914
STK11_Ismailoglu201203_XENLA_00071312	0.632908	3.18245	15.6873	7.47231e-05	0.00243502
GNB3_Taira201203_XENLA_stage_00158844	-0.620818	5.45412	15.6867	7.47475e-05	0.00243502
NM_001089947.1	0.613893	2.72454	15.6757	7.5183e-05	0.00244546
ZNF608_Taira201203_XENLA_tissue_00224728	-0.463464	4.98096	15.6684	7.54749e-05	0.0024512
NP_001093736.1_Audic201207_XENLA_00006401	-0.648836	2.42142	15.6624	7.57139e-05	0.00245521
NM_001096250.1	0.633804	4.00075	15.6548	7.60198e-05	0.00246137
SKP2_Taira201203_XENLA_stage_00139479	-0.402096	6.72579	15.6307	7.69956e-05	0.00248571
C2CD3_TC462336	0.752163	1.46687	15.6304	7.70054e-05	0.00248571
CABP4_Taira201203_XENLA_tissue_00232609	-0.936545	0.0651916	15.621	7.73904e-05	0.00249434
NA_Taira201203_XENLA_tissue_00001097	-0.529997	4.46218	15.6131	7.77161e-05	0.00250105
ZADH2_Kwon201107_XENLA_00057288	0.667351	2.08415	15.6045	7.8067e-05	0.00250854
TRRAP_Quigley201112_XENLA_00016575	-0.51347	4.34222	15.5874	7.87797e-05	0.00252762
NTN3_Park201106_XENLA_00145564	-0.698086	1.80545	15.5757	7.92655e-05	0.00253937
LRP10_Kwon201107_XENLA_00125015	-0.678494	4.48495	15.5478	8.04455e-05	0.00257329
GPR61_Ismailoglu201203_XENLA_00064987	-0.687175	2.09269	15.5139	8.19011e-05	0.00261591
ZDHHC8_Ismailoglu201203_XENLA_00058992	-0.412835	5.78736	15.5071	8.21953e-05	0.00262136
ADMP2_Ismailoglu201203_XENLA_00055348	-0.53652	5.35296	15.4795	8.34029e-05	0.00265541
BC169769.1	-0.636624	4.31871	15.4771	8.35128e-05	0.00265541
ZBTB5_Quigley201207_XENLA_00042702	-0.62954	3.50481	15.4713	8.37683e-05	0.00265955
PTPN12_TC415501	0.450152	5.15658	15.4567	8.44151e-05	0.00267609
SMO_XeXenL6RMv10055574m	-0.608089	3.64863	15.4474	8.4835e-05	0.00268539
LRP2_Ismailoglu201203_XENLA_00058798	-0.889682	1.76734	15.4289	8.56684e-05	0.00270773
MLLT1_Ismailoglu201203_XENLA_00007653	-0.404791	6.17041	15.4231	8.59297e-05	0.00271196
KIAA1324_Taira201203_XENLA_tissue_00148244	-0.611044	5.06174	15.4089	8.65785e-05	0.00272445
LUC7L3_Taira201203_XENLA_tissue_00242858	-0.474899	6.84047	15.4088	8.65822e-05	0.00272445
ARHGEF11_Ismailoglu201203_XENLA_00016023	-0.469171	5.47708	15.398	8.70826e-05	0.00273614
NM_001099863.1	-0.462634	5.00925	15.3782	8.79994e-05	0.00276087
RPA2_Taira201203_XENLA_stage_00093171	-0.484612	4.95701	15.3451	8.95514e-05	0.00280541
GPR45_Taira201203_XENLA_tissue_00055901	-0.856101	0.607245	15.3253	9.04954e-05	0.00283081
BC077981.1	-0.396645	6.95296	15.3151	9.09842e-05	0.00284192
PFKFB3_Taira201203_XENLA_tissue_00086628	0.45738	4.99673	15.2857	9.24129e-05	0.0028823
DCAF5_XeXenL6RMv10011850m	0.617667	2.69634	15.276	9.28902e-05	0.00289294
TXN2_Quigley201112_XENLA_00105035	-0.651662	4.57784	15.2515	9.41032e-05	0.00292643
RNF114_Audic201207_XENLA_00000964	-0.576827	2.9055	15.1969	9.68642e-05	0.00300688
NA_TeperekTkacz201202_XENLA_00032161	0.546329	3.66778	15.1924	9.7094e-05	0.00300688
NR1I3_Quigley201112_XENLA_00102560	-1.04808	-0.325306	15.192	9.7115e-05	0.00300688
SLC16A6_Taira201203_XENLA_tissue_00216039	-0.899023	1.4373	15.1705	9.8224e-05	0.0030368
RPA1_Quigley201112_XENLA_00076311	-0.550226	3.08521	15.1624	9.86474e-05	0.00304545
PCDHA13_Quigley201207_XENLA_00054861	-0.58285	3.45981	15.1579	9.88816e-05	0.00304825
BC093544.1	0.445637	5.55701	15.1438	9.96225e-05	0.00306664
NM_001087873.1	-0.493581	8.41953	15.1282	0.000100449	0.003086
CU659670.1_Quigley201112_XENLA_00077271	-0.432588	6.66549	15.1265	0.000100542	0.003086
AB075972.1	-0.780023	1.72174	15.1129	0.000101271	0.00310388
ANKIB1_XeXenL6RMv10004271m	0.547329	3.34568	15.0971	0.000102121	0.00312544
ARHGAP33_XeXenL6RMv10026157m	-0.673469	1.48587	15.0926	0.000102364	0.00312836
IRF2BPL_TeperekTkacz201206_XENLA_00033211	-0.422862	6.09403	15.0881	0.00010261	0.00313137
ZFP91_Taira201203_XENLA_tissue_00291704	-0.49158	4.65691	15.0698	0.000103608	0.00315729
SYT10_TeperekTkacz201206_XENLA_00113452	-1.297	-1.03854	15.066	0.000103814	0.00315903
CCDC84_Taira201203_XENLA_stage_00192321	-0.555271	3.40681	15.0567	0.000104328	0.00317014
SIN3B_XeXenL6RMv10028576m	0.51424	4.5674	15.0493	0.000104737	0.00317462
NA_TC446646	-0.672842	1.71352	15.0487	0.000104775	0.00317462
ECE1_XeXenL6RMv10018800m	-0.493112	5.37941	15.0308	0.000105768	0.00320017
DLX3_TeperekTkacz201206_XENLA_00026045	-0.649638	3.38096	14.9841	0.000108419	0.00327507
LSG1_Ismailoglu201203_XENLA_00059027	-0.442485	5.87349	14.9818	0.000108555	0.00327507
NM_001096247.1	-0.526718	3.71289	14.9791	0.000108706	0.00327507
C9ORF7_Taira201203_XENLA_stage_00097346	-0.401573	5.93991	14.9623	0.000109679	0.00329969
NA_Park201106_XENLA_00137699	0.545523	3.50202	14.9422	0.000110858	0.00332563
HNRNPU_Taira201203_XENLA_stage_00209095	0.417751	6.19039	14.942	0.000110869	0.00332563
OCT91_Ismailoglu201203_XENLA_00018689	-0.477177	7.04176	14.9396	0.000111011	0.00332563
MED1_XENTR_Kwon201107_XENLA_00106854	-0.494699	4.17132	14.8969	0.000113548	0.00339685
NM_001097873.1	0.954933	1.4477	14.8834	0.000114367	0.00341454
BLOC1S1_Horb201201_XENLA_00037067	-0.433887	5.24556	14.8809	0.000114514	0.00341454
C7ORF55_TeperekTkacz201202_XENLA_00021410	-0.592465	3.04689	14.8792	0.000114622	0.00341454
NM_001127763.1	-0.457307	5.86961	14.8738	0.00011495	0.00341594
PIF1_Ismailoglu201203_XENLA_00038882	-0.501964	4.29697	14.8731	0.00011499	0.00341594
EDC3_TC417526	-0.480826	4.36715	14.8567	0.000115998	0.00344105
BCL9L_XeXenL6RMv10054525m	0.827496	0.649568	14.852	0.000116284	0.00344472
WAC_Kwon201107_XENLA_00107928	-0.46033	5.25612	14.8118	0.000118793	0.00351027
BC087472.1	-0.572132	3.57041	14.8112	0.000118827	0.00351027
NUF2_TC425868	-0.635747	2.53114	14.7975	0.000119695	0.00353101
LSM3_XeXenL6RMv10027884m	-0.592155	4.59242	14.7772	0.000120989	0.00356367
LIMD2_Taira201203_XENLA_tissue_00206729	-1.19761	-0.12511	14.7749	0.000121138	0.00356367
CCNE2_XeXenL6RMv10009987m	-0.545094	5.66503	14.7674	0.000121623	0.00357298
BC046690.1	-0.518312	4.81896	14.7579	0.000122235	0.003586
KIAA0195_TeperekTkacz201202_XENLA_00083987	-0.440256	5.34134	14.6966	0.000126274	0.00369939
CEP57_Taira201203_XENLA_stage_00133655	-0.540639	3.26234	14.6793	0.000127441	0.00372844
GAP43_XeXenL6RMv10048299m	-0.828788	1.31868	14.6664	0.000128312	0.00374876
BC157501.1	-0.454715	5.41283	14.6307	0.00013077	0.00381211
CAMTA2_Audic201207_XENLA_00000574	0.555231	3.60268	14.6297	0.000130839	0.00381211
MCC_Ismailoglu201203_XENLA_00013443	-0.8087	2.31088	14.6001	0.000132911	0.00386716
SAC3D1_TC449726	-0.60384	2.62813	14.5524	0.000136316	0.0039608
NP_001128287.2_Quigley201207_XENLA_00080846	-0.412471	5.69677	14.5406	0.00013717	0.00398017
CTPS_Ismailoglu201203_XENLA_00039586	-0.559463	7.56226	14.5258	0.000138256	0.00400621
ZNF438_XeXenL6RMv10026903m	-0.818368	1.6547	14.5228	0.000138473	0.00400703
B0JZZ7_XENTR_TeperekTkacz201206_XENLA_00107489	-0.481573	5.73276	14.5134	0.000139167	0.00402164
VBP1_Taira201203_XENLA_stage_00149257	-0.678848	1.7535	14.5059	0.000139724	0.00403226
FAM160B2_XeXenL6RMv10009372m	-0.478387	4.77637	14.5005	0.000140123	0.00403683
PPP2R3B_Taira201203_XENLA_tissue_00000677	-0.621571	3.38199	14.4985	0.000140268	0.00403683
GTF3C5_Taira201203_XENLA_tissue_00043880	-0.63987	1.93884	14.4961	0.000140453	0.00403683
BC099290.1	-0.4	6.00448	14.4877	0.000141079	0.00404934
NM_001086111.1	-0.461592	5.53145	14.4817	0.000141525	0.00405184
SORT1_Kwon201107_XENLA_00030116	0.494603	4.05468	14.4814	0.000141547	0.00405184
LRP2_Quigley201112_XENLA_00119416	-0.668812	3.54595	14.4761	0.000141953	0.00405798
BC091724.1	-0.646902	4.93561	14.4714	0.000142303	0.00406252
MTTP.2_XeXenL6RMv10032205m	-0.905537	0.651515	14.4669	0.000142647	0.00406689
M14455.1	-0.586506	5.64878	14.4639	0.000142873	0.00406787
MN1_Ismailoglu201203_XENLA_00041117	-0.405857	7.87962	14.451	0.000143853	0.00408572
FAM89A_Taira201203_XENLA_tissue_00220396	0.662937	2.32502	14.4506	0.000143885	0.00408572
XB-GENE-5809273_Kwon201107_XENLA_00074251	-0.47922	5.60583	14.4396	0.000144729	0.00410162
INO80D_XeXenL6RMv10033716m	-0.650166	2.86696	14.4375	0.00014489	0.00410162
PCDH19_Taira201203_XENLA_tissue_00195057	-0.675885	3.3417	14.434	0.000145157	0.00410162
KDM5A_TeperekTkacz201206_XENLA_00001125	-0.535404	4.67502	14.4332	0.000145217	0.00410162
KANSL3_XeXenL6RMv10021932m	-0.526663	4.4892	14.4218	0.0001461	0.00412107
NA_TeperekTkacz201206_XENLA_00009918	-0.700612	2.47993	14.4193	0.000146295	0.00412109
PTCHD4_Ismailoglu201203_XENLA_00012484	-0.821181	0.853418	14.4093	0.000147076	0.00413761
NM_001095674.1	-0.847068	0.986829	14.405	0.000147413	0.0041397
AKAP12_Taira201203_XENLA_tissue_00172113	-0.415362	5.97115	14.401	0.000147722	0.0041397
C12ORF63_mgEST_Xl4jul2012_1013112829	0.849238	1.15737	14.4009	0.000147735	0.0041397
MAB21L3_TeperekTkacz201202_XENLA_00044667	-0.969338	0.0143062	14.3848	0.000148997	0.00416956
NA_Horb201201_XENLA_00093984	-0.502498	4.12347	14.379	0.000149463	0.0041771
DDX6_Chung201110_XENLA_00035885	-0.545603	4.76571	14.3463	0.000152081	0.00424468
CAT.1_Amin201106_XENLA_00029949	-0.888138	0.999574	14.3317	0.00015326	0.00427198
B0BLZ3_XENTR_Kwon201107_XENLA_00046398	0.593771	2.95007	14.3242	0.000153873	0.00428344
EPAS1_Taira201203_XENLA_tissue_00009422	0.414944	5.74712	14.303	0.000155617	0.00432631
BSG_Taira201203_XENLA_stage_00064779	0.386513	8.69983	14.2961	0.000156184	0.00433641
EXOC6B_Taira201203_XENLA_stage_00139731	0.618545	2.11824	14.284	0.000157195	0.00435877
MST1R_Taira201203_XENLA_tissue_00266232	-0.570953	3.05557	14.2796	0.000157566	0.00436335
TRRAP_XeXenL6RMv10043115m	-0.396133	6.60317	14.2659	0.000158713	0.00438942
NA_XeXenL6RMv10030859m	-0.57131	3.94172	14.2626	0.000158994	0.00439145
RNASEK_TC432768	-0.573636	2.62206	14.252	0.000159894	0.0044106
ESYT3_Taira201203_XENLA_tissue_00009397	-0.519327	4.22915	14.2479	0.00016024	0.00441439
FAM123B_Taira201203_XENLA_stage_00109544	-0.372524	7.55712	14.2385	0.000161045	0.00443082
NM_001092654.1	-0.900111	0.500801	14.235	0.000161342	0.00443325
BC153759.1	-0.44125	5.63759	14.214	0.000163152	0.00447719
PSEN1_TC416461	-0.436372	5.32258	14.2065	0.000163801	0.00448921
NM_001096860.1	-0.633659	2.04481	14.1778	0.000166323	0.00455244
ATP13A-LIKE_Taira201203_XENLA_stage_00178850	0.773924	3.28994	14.159	0.000167992	0.00458663
TULP3_Kwon201107_XENLA_00000903	-0.467652	5.70356	14.1589	0.000168004	0.00458663
H2AY_CHICK_Taira201203_XENLA_tissue_00087552	-0.842052	2.38923	14.1564	0.000168222	0.00458671
PHF21B_XeXenL6RMv10052798m	-0.706493	2.40225	14.1473	0.000169042	0.00460313
WDR67_TC414244	-0.483743	5.12469	14.1321	0.000170406	0.00463435
RREB1_Ismailoglu201203_XENLA_00007423	-0.569995	6.17533	14.1252	0.000171038	0.00464559
BCAR3_Ismailoglu201203_XENLA_00023261	0.588401	3.86375	14.1149	0.000171977	0.00466513
NM_001112743.1	-0.679399	1.47732	14.1062	0.000172774	0.00468077
NM_001090073.1	-0.755029	1.40925	14.1003	0.000173313	0.00468938
AF183571.1	-0.977954	1.79579	14.0667	0.000176442	0.00476797
PNP_XeXenL6RMv10028362m	-0.696003	3.11683	14.0596	0.000177112	0.00478
A7MC59_XENTR_XeXenL6RMv10023807m	-0.535338	5.34245	14.0527	0.00017776	0.00479141
NM_001093111.1	-0.632296	1.97175	14.0499	0.000178022	0.00479238
NA_XeXenL6RMv10050733m	-0.632244	1.93365	14.031	0.000179818	0.0048346
CCDC51_Taira201203_XENLA_tissue_00162324	-0.397798	6.03143	14.0248	0.000180419	0.00484464
SLC25A28_Taira201203_XENLA_tissue_00145930	0.532025	3.07672	14.0039	0.000182436	0.00489262
TCF3_XeXenL6RMv10004575m	-0.425053	7.5863	13.9831	0.000184459	0.00494061
GPSM2_Quigley201207_XENLA_00052307	-0.378397	7.29348	13.9673	0.000186023	0.00497622
RBM48_Kwon201107_XENLA_00082511	0.889531	0.525654	13.9648	0.000186268	0.00497653
NCKAP5L_Ismailoglu201203_XENLA_00001033	-0.458639	5.17119	13.9549	0.000187254	0.00499657
PAN3_XeXenL6RMv10014009m	-0.480774	3.96132	13.9506	0.000187679	0.00500163
PIAS4_Taira201203_XENLA_stage_00216065	-0.417995	5.4291	13.9321	0.000189529	0.00504461
CHST2_XeXenL6RMv10045321m	-0.58287	2.55642	13.9227	0.000190486	0.00506373
EIF2C4_XeXenL6RMv10006325m	-0.419336	6.30366	13.8888	0.00019395	0.0051478
KIAA0895L_Taira201203_XENLA_tissue_00128884	-0.586115	2.35427	13.887	0.000194133	0.0051478
NM_001089818.1	-0.401812	6.6457	13.8829	0.000194557	0.0051526
BC074447.1	-0.547334	3.43047	13.862	0.000196737	0.00520385
C19ORF26_TeperekTkacz201202_XENLA_00119152	-0.678694	1.68289	13.8589	0.000197065	0.00520603
EMG1_TC426727	-0.400609	5.63573	13.855	0.000197467	0.00521018
TBX20_Amin201106_XENLA_00028934	-0.813774	1.32515	13.8328	0.000199822	0.00526578
PPP1R9B_Audic201207_XENLA_00000990	-1.11397	-0.185	13.8261	0.000200532	0.00526804
PCDH9_XeXenL6RMv10042447m	-1.17325	0.505525	13.8245	0.000200707	0.00526804
C6ORF47_Kwon201107_XENLA_00076346	-0.473905	5.85646	13.8235	0.00020081	0.00526804
NM_001087450.1	-0.492964	5.39542	13.8226	0.0002009	0.00526804
RSBN1L_Quigley201207_XENLA_00102409	0.458775	4.56486	13.8169	0.00020152	0.00527778
NA_Taira201203_XENLA_tissue_00152464	-0.432763	6.57255	13.8138	0.000201847	0.00527984
MTA2_Kwon201107_XENLA_00025889	-0.354114	7.39238	13.7931	0.000204088	0.0053319
SF3B2_Kwon201107_XENLA_00027297	-0.343882	8.7994	13.7859	0.000204863	0.00534556
AURKA_Taira201203_XENLA_stage_00023879	-0.506177	4.93947	13.7635	0.00020733	0.0054033
NA_XeXenL6RMv10052889m	-0.627364	2.03949	13.7588	0.00020784	0.00540995
ZNF474_Taira201203_XENLA_tissue_00218775	-0.79289	0.976728	13.7473	0.000209117	0.00543653
BC076744.1	0.582118	2.78558	13.7352	0.000210478	0.00546522
HEPACAM_Taira201203_XENLA_tissue_00174038	-1.01796	0.87686	13.7115	0.000213141	0.00552762
SENP8_TC418942	-0.549864	2.79906	13.7037	0.000214027	0.00554381
ANKRD13C_XeXenL6RMv10025119m	0.602664	4.48771	13.6783	0.000216946	0.00560991
RBM23_XeXenL6RMv10014269m	-0.463445	4.24858	13.6769	0.000217107	0.00560991
NM_001086964.1	-0.501221	6.87876	13.6542	0.000219751	0.00567133
NUTF2_Quigley201207_XENLA_00001517	-0.431811	5.38702	13.6468	0.000220614	0.00568669
SOCS4_Taira201203_XENLA_stage_00005864	-0.629314	3.42275	13.6389	0.000221546	0.00570379
CABZ01085657.1_Ismailoglu201203_XENLA_00022201	-0.493811	4.20156	13.6298	0.00022262	0.00572452
ARHGEF2_TC453506	-0.510852	3.94581	13.6198	0.000223809	0.00574158
NM_001086382.1	-0.669047	3.17219	13.6197	0.000223824	0.00574158
C3ORF58_Taira201203_XENLA_tissue_00286580	0.394137	5.75786	13.6155	0.000224331	0.00574305
NM_001087438.1	-0.459842	4.95515	13.6147	0.000224422	0.00574305
NM_001103185.1	0.903122	0.190796	13.6083	0.000225189	0.00575573
FAM134A_Kwon201107_XENLA_00053449	-0.652034	1.8028	13.5841	0.000228113	0.00582345
NP_001076825.1_Taira201203_XENLA_tissue_00146118	-0.615489	3.77974	13.571	0.000229711	0.00585385
ZNF574_Taira201203_XENLA_tissue_00067825	-0.585544	3.11872	13.5698	0.000229855	0.00585385
MAP2K6_TC416486	-0.442745	6.80626	13.5669	0.000230215	0.005856
ESYT3_Taira201203_XENLA_tissue_00066366	-0.752154	3.0295	13.5531	0.000231908	0.00589202
TRAFD1_Taira201203_XENLA_stage_00082059	-0.542521	3.13405	13.5486	0.000232467	0.00589916
CCNB1.2_Taira201203_XENLA_tissue_00082055	0.417431	7.3605	13.5414	0.00023336	0.00591476
NA_XeXenL6RMv10034952m	1.2225	-0.805229	13.5218	0.000235807	0.00596965
NA_TC448622	-0.541231	2.82242	13.4999	0.000238578	0.00603262
PLCL2_Taira201203_XENLA_stage_00148787	0.701707	1.51696	13.4922	0.000239562	0.00605029
FSTL1_Taira201203_XENLA_stage_00188856	-0.996534	3.59802	13.4755	0.000241705	0.00609717
NM_001110728.1	-0.54159	3.36171	13.4673	0.000242756	0.00611642
ARHGEF17_Ismailoglu201203_XENLA_00004066	-0.623048	2.53017	13.4256	0.000248217	0.0062453
TMEM169_XeXenL6RMv10045782m	-0.698754	3.09938	13.4237	0.000248459	0.0062453
NA_TeperekTkacz201206_XENLA_00025552	-0.517785	6.45817	13.419	0.000249084	0.0062536
BC073274.1	1.07517	-0.391381	13.4095	0.000250353	0.00627521
CNOT8_XeXenL6RMv10046560m	-0.372442	6.24316	13.4081	0.000250536	0.00627521
CHKA_Park201106_XENLA_00025589	0.799433	2.33961	13.3846	0.000253705	0.00634711
USP43_XeXenL6RMv10047014m	-0.460718	5.80515	13.3753	0.000254957	0.00636322
LRP2_Ismailoglu201203_XENLA_00051119	-0.753867	1.9641	13.3736	0.000255191	0.00636322
U44049.1	-0.585283	3.35311	13.3713	0.000255501	0.00636322
PPP1R8_Ismailoglu201203_XENLA_00020363	-0.337112	8.66933	13.371	0.000255548	0.00636322
NM_001094589.1	-0.403031	7.32243	13.3677	0.000255997	0.00636696
BC141734.1	-0.438717	4.5045	13.3518	0.000258178	0.00640995
NM_001085945.1	0.690403	2.41642	13.3507	0.000258329	0.00640995
SLX4_Taira201203_XENLA_stage_00056023	-0.428224	4.96137	13.2903	0.000266778	0.00661187
NA_XeXenL6RMv10000119m	-0.449179	4.38152	13.2729	0.000269266	0.00666575
COPE_XeXenL6RMv10036817m	-0.419233	5.5421	13.241	0.000273896	0.00677248
RNF115_Chung201110_XENLA_00082365	0.47209	4.16748	13.2367	0.00027452	0.00678001
RPS10_Taira201203_XENLA_stage_00132484	-0.431001	5.08978	13.2182	0.000277238	0.00683919
VHL_Kwon201107_XENLA_00091908	-0.740616	2.02702	13.2102	0.000278428	0.00685234
NM_001086489.1	-0.877365	0.629401	13.2083	0.000278718	0.00685234
KRT16_TC420262	0.981309	0.400558	13.2074	0.000278849	0.00685234
NM_001097926.1	-0.664605	2.65754	13.2059	0.000279062	0.00685234
NM_001099880.1	0.757017	2.01319	13.2022	0.000279627	0.0068583
MTA1_TeperekTkacz201206_XENLA_00059175	-0.439544	5.82411	13.1516	0.000287266	0.00703753
VAMP7_Taira201203_XENLA_stage_00167474	0.454525	4.46938	13.1491	0.000287657	0.00703898
TP53INP2_Taira201203_XENLA_stage_00212061	-0.455341	5.49269	13.1363	0.000289628	0.00707526
SLC38A5_Ismailoglu201203_XENLA_00039459	-0.639567	3.57329	13.1333	0.000290086	0.00707526
BCL2L12_Taira201203_XENLA_tissue_00180298	-0.439321	5.45143	13.1296	0.000290668	0.00707526
SLC7A5_Ismailoglu201203_XENLA_00041574	-0.825864	3.45812	13.1288	0.000290785	0.00707526
OSR1_Taira201203_XENLA_stage_00176560	-0.479717	5.14695	13.1287	0.000290805	0.00707526
DARMIN_TeperekTkacz201206_XENLA_00081109	-0.759915	5.99547	13.1228	0.000291726	0.00708953
SF3B3_XeXenL6RMv10021618m	-0.366338	7.36051	13.115	0.000292935	0.0071108
POLRMT_Taira201203_XENLA_stage_00115796	0.56607	3.95429	13.1099	0.000293733	0.00712201
BC106392.1	-0.783778	2.95843	13.0991	0.000295435	0.00715512
LSP1_Taira201203_XENLA_stage_00164452	-0.582432	4.67744	13.0951	0.000296068	0.00716227
LIN9_Ismailoglu201203_XENLA_00019645	0.468798	5.61779	13.0904	0.000296807	0.00717199
PALM_Park201106_XENLA_00093966	-0.759012	4.74539	13.0882	0.000297164	0.00717247
HM117644.1	-0.642973	1.79984	13.086	0.000297507	0.00717259
CKAP5_XeXenL6RMv10036592m	-0.480183	7.77808	13.0522	0.000302926	0.00729496
NM_001086198.1	-0.452361	6.36726	13.0433	0.000304376	0.00732158
EYA3_Ismailoglu201203_XENLA_00041083	0.382012	6.58915	13.0368	0.000305434	0.00733607
LLGL1_Taira201203_XENLA_stage_00132656	-0.365331	6.38913	13.0353	0.00030567	0.00733607
NM_001091289.1	0.575401	2.92738	13.0176	0.00030858	0.00739015
TBCD_TeperekTkacz201202_XENLA_00086397	0.962305	-0.316352	13.0153	0.000308962	0.00739015
PSMD14_Taira201203_XENLA_stage_00119967	-0.58831	2.98079	13.0132	0.000309295	0.00739015
ANKRD24_Quigley201112_XENLA_00094647	-1.13692	-0.574642	13.0131	0.000309315	0.00739015
PPP1R14C_Taira201203_XENLA_stage_00036081	-0.827416	0.704021	13.0021	0.00031115	0.00742565
ZMYND8_Kwon201107_XENLA_00012223	-0.71252	1.57015	12.9875	0.000313572	0.00747504
LONP1_Ismailoglu201203_XENLA_00038181	0.509711	4.26816	12.9848	0.000314033	0.00747766
MIS18BP1_Ismailoglu201203_XENLA_00020599	-0.3984	6.55517	12.9813	0.000314625	0.00748335
C15ORF23_Ismailoglu201203_XENLA_00045514	-0.536666	2.86878	12.97	0.00031653	0.00751989
CCNB1.2_Quigley201207_XENLA_00033085	0.393867	8.05486	12.9679	0.000316869	0.00751989
MAPRE2_Taira201203_XENLA_stage_00165975	0.588822	2.68147	12.9565	0.000318812	0.00755332
NA_XeXenL6RMv10050302m	0.997045	0.463914	12.9555	0.000318989	0.00755332
BDKRB2_XeXenL6RMv10023092m	-1.60163	-1.13993	12.9449	0.000320796	0.00758765
FBLIM1_Quigley201207_XENLA_00064131	-0.569161	3.9523	12.9337	0.000322711	0.00762445
NM_001094153.1	-0.450381	5.14328	12.9264	0.000323973	0.00764576
APOBEC2_XeXenL6RMv10043583m	-0.573603	6.16416	12.923	0.000324562	0.00765117
DEF8_Kwon201107_XENLA_00055885	0.630295	2.00512	12.9143	0.000326081	0.00767845
NM_001086719.1	-0.572453	4.16671	12.9122	0.000326451	0.00767864
NA_Taira201203_XENLA_tissue_00124904	-0.431366	4.80643	12.8874	0.000330797	0.00777226
ABCG2_TC415692	-0.469801	4.48502	12.8729	0.000333378	0.00782263
LYAR_Taira201203_XENLA_stage_00043919	-0.353582	7.50722	12.8712	0.000333677	0.00782263
B0JYW4_XENTR_Ismailoglu201203_XENLA_00030582	0.34568	7.00901	12.8575	0.000336132	0.0078715
NM_001092407.1	-0.362641	6.44071	12.8512	0.000337263	0.00788928
CCDC6_TeperekTkacz201206_XENLA_00080302	0.403605	5.35783	12.8453	0.000338328	0.00790549
ZMYM3_Ismailoglu201203_XENLA_00065233	-0.361946	7.53918	12.8345	0.000340294	0.00794137
SCNN1A_Taira201203_XENLA_tissue_00291738	-0.559542	2.68495	12.8327	0.000340611	0.00794137
NA_Ismailoglu201203_XENLA_00041458	-0.542992	2.57476	12.824	0.0003422	0.00796597
N4BP2L2_Taira201203_XENLA_stage_00178959	-0.460981	4.27802	12.8228	0.000342417	0.00796597
DCTN4_TeperekTkacz201202_XENLA_00113696	-0.60416	4.81593	12.8034	0.000345992	0.00804034
PHF6_XeXenL6RMv10005473m	0.515834	2.87878	12.7979	0.000347014	0.00805528
BRD7_Taira201203_XENLA_stage_00012700	-0.792046	0.638358	12.7872	0.000348991	0.00809232
C22ORF28_XeXenL6RMv10002642m	0.564969	2.26014	12.7807	0.000350214	0.00811183
NA_Taira201203_XENLA_tissue_00237396	-0.72946	1.14714	12.7635	0.000353453	0.00817794
ZNF319_TeperekTkacz201206_XENLA_00077695	-0.373	5.89917	12.7381	0.000358273	0.00828044
NA_XeXenL6RMv10045073m	0.594053	2.18201	12.717	0.000362353	0.00836563
NM_001086996.1	-0.390661	5.87835	12.7128	0.000363163	0.00837523
RARG_Quigley201207_XENLA_00089403	-0.405208	6.93739	12.7006	0.000365548	0.00842108
NRIP1_XeXenL6RMv10037491m	0.506608	3.50535	12.6959	0.000366461	0.00843298
NA_Amin201106_XENLA_00063535	-0.824872	0.789045	12.6853	0.000368547	0.00846254
CNOT3_TC428805	-0.348695	6.90454	12.6845	0.000368706	0.00846254
ANO9_Quigley201112_XENLA_00037981	-0.603524	6.62423	12.6833	0.000368941	0.00846254
NA_XeXenL6RMv10054440m	-0.573195	3.9689	12.6804	0.000369506	0.00846634
NA_TC450878	0.52726	7.85682	12.6761	0.000370369	0.00847698
SCAF8_Kwon201107_XENLA_00019796	-0.365569	6.21132	12.6727	0.000371034	0.00848305
PTK2B_XeXenL6RMv10011980m	-0.606969	3.90497	12.6707	0.000371437	0.00848314
GCN1L1_Kwon201107_XENLA_00085727	-0.350004	7.15311	12.6666	0.000372237	0.00849228
NA_Taira201203_XENLA_stage_00095941	-0.725999	3.78978	12.6622	0.000373123	0.00850336
HEXIM1_Taira201203_XENLA_stage_00027316	-0.483368	5.13062	12.6435	0.000376876	0.00857969
NEURL1B_Ismailoglu201203_XENLA_00018114	0.47143	4.67666	12.6297	0.000379659	0.00863379
TMF1_XeXenL6RMv10020467m	0.597877	3.78864	12.6242	0.000380783	0.0086501
QRICH1.2_Park201106_XENLA_00163047	0.896985	0.581649	12.6179	0.000382075	0.00867001
NA_XeXenL6RMv10040324m	-1.25222	1.03093	12.614	0.000382859	0.00867001
CYP2R1_Ismailoglu201203_XENLA_00043328	-0.547174	2.35356	12.6139	0.000382885	0.00867001
NM_001093627.1	1.07892	0.16838	12.5993	0.000385896	0.00872889
NM_001095514.1	-0.349209	6.89592	12.5821	0.000389457	0.00880007
GPR158_Kwon201107_XENLA_00027721	-0.694137	1.12196	12.5777	0.000390377	0.00881149
NM_001135232.1	-0.513607	6.95125	12.5701	0.000391966	0.00883796
CNN1_Ismailoglu201203_XENLA_00072446	-0.376457	8.21686	12.5603	0.000394029	0.00887505
KIAA1549_XeXenL6RMv10048680m	-0.948077	-0.286302	12.547	0.000396846	0.00892904
TOX4_Taira201203_XENLA_stage_00148104	-0.486452	4.0925	12.5442	0.000397438	0.00893068
DAZAP1_TeperekTkacz201206_XENLA_00126413	-0.402436	5.83739	12.5415	0.000398005	0.00893068
C19ORF20_Taira201203_XENLA_stage_00078284	-0.587769	3.05287	12.5407	0.000398181	0.00893068
NM_001096587.1	-0.45321	5.73055	12.53	0.00040048	0.00897279
NM_001086084.1	-0.511526	6.43509	12.5269	0.000401136	0.00897801
KCNN1_Ismailoglu201203_XENLA_00007109	-0.682791	1.64443	12.5202	0.000402584	0.00900094
NOVA2_Ismailoglu201203_XENLA_00023819	-0.464554	4.84823	12.4989	0.000407184	0.0090942
TRIM71_TeperekTkacz201202_XENLA_00070025	-0.644296	4.07153	12.49	0.000409133	0.00912813
RNASEK_mgEST_Xl4jul2012_1013254775	-0.447927	4.46272	12.4831	0.000410653	0.00915145
DLX3_Taira201203_XENLA_stage_00214349	-0.649832	3.83261	12.4813	0.00041104	0.00915145
ZNF295_Ismailoglu201203_XENLA_00074710	-0.429957	4.95785	12.4682	0.00041394	0.00920637
RGNEF_Taira201203_XENLA_tissue_00090210	0.848007	0.481471	12.4638	0.000414922	0.00921856
UNC50_Taira201203_XENLA_stage_00170341	-0.530413	4.62946	12.4548	0.000416918	0.00925323
CNTRL_Park201106_XENLA_00169531	-0.453167	7.1803	12.4461	0.000418874	0.00926582
GABPB1_Kwon201107_XENLA_00110860	0.447221	4.61368	12.4446	0.000419196	0.00926582
KLHL13_Kwon201107_XENLA_00080381	0.473526	3.69339	12.4442	0.000419284	0.00926582
SOCS3_Taira201203_XENLA_tissue_00286385	-0.381846	5.8383	12.4419	0.000419816	0.00926582
NOC2L_Kwon201107_XENLA_00026175	-0.33066	7.37822	12.4406	0.000420094	0.00926582
DNAJC16_Kwon201107_XENLA_00027956	0.46086	4.34424	12.4406	0.000420103	0.00926582
VANGL1_Taira201203_XENLA_tissue_00058232	-0.506185	3.93481	12.4272	0.000423137	0.00931884
SLC38A5_Taira201203_XENLA_tissue_00221968	-0.93736	0.866218	12.4254	0.000423525	0.00931884
NM_001171715.1	-0.408835	5.39386	12.4241	0.000423823	0.00931884
SI_CH211-110P13.9_Taira201203_XENLA_tissue_00171187	-1.02903	-0.0619076	12.4192	0.000424935	0.00933362
BC084260.1	0.517735	3.41541	12.4119	0.000426609	0.00936072
NM_001096378.1	-0.827418	0.414739	12.39	0.000431643	0.00946141
CDK16_Taira201203_XENLA_stage_00127772	0.607079	2.1718	12.3609	0.000438423	0.0096001
SMARCE1_Ismailoglu201203_XENLA_00050292	-0.339049	8.38017	12.3007	0.000452784	0.00990436
AFF4_XeXenL6RMv10030401m	-0.488191	4.31888	12.2985	0.000453321	0.00990591
TRAF6_Taira201203_XENLA_stage_00138423	0.760911	0.54561	12.285	0.000456605	0.00996742
FZD6_Ismailoglu201203_XENLA_00067795	-0.568124	3.32159	12.2767	0.000458646	0.0100017
PELI2_Ismailoglu201203_XENLA_00043540	-0.510872	6.15234	12.2695	0.000460431	0.0100303
NM_001091738.1	0.632533	2.37777	12.2671	0.000461025	0.010033
NA_XeXenL6RMv10018531m	-0.678806	1.51142	12.2605	0.000462653	0.0100581
DENND4A_XeXenL6RMv10038989m	0.59123	2.39984	12.2536	0.000464366	0.010085
NM_001085628.1	-0.462232	4.88861	12.2388	0.000468071	0.0101466
NUFIP1_Kwon201107_XENLA_00003810	-0.526092	3.39379	12.2384	0.000468157	0.0101466
OSBPL2_Horb201201_XENLA_00194443	-1.10014	0.30114	12.2324	0.000469673	0.0101649
PTCH2_Taira201203_XENLA_stage_00153759	-0.534008	4.25592	12.2312	0.000469959	0.0101649
NM_001090653.1	-0.572945	4.16463	12.2161	0.000473794	0.0102374
TCEB3_Taira201203_XENLA_tissue_00260078	-0.436278	6.09197	12.2093	0.000475515	0.010255
BC075192.1	-0.558984	2.82998	12.2091	0.000475571	0.010255
GLI1.1_Taira201203_XENLA_stage_00150788	-0.522779	3.4454	12.2032	0.000477077	0.010277
NM_001096579.1	-0.426958	4.99349	12.197	0.000478673	0.0103009
PDIK1L_XeXenL6RMv10003649m	-0.429418	4.48758	12.1782	0.000483521	0.0103897
CCDC63_Quigley201112_XENLA_00064656	-0.643	2.32292	12.1772	0.000483776	0.0103897
NA_Taira201203_XENLA_stage_00201365	-0.61548	3.49907	12.1714	0.000485268	0.0104069
LOXL1_Ismailoglu201203_XENLA_00046036	-0.554443	3.19807	12.1703	0.000485556	0.0104069
ZNF609_Taira201203_XENLA_tissue_00125014	-0.34801	6.78039	12.1646	0.000487038	0.0104201
CRLF3_Taira201203_XENLA_stage_00168876	0.351901	6.55345	12.1642	0.000487153	0.0104201
NM_001086587.1	-0.44467	8.08352	12.1548	0.000489628	0.0104532
NM_001095089.1	-0.371854	5.9297	12.153	0.000490079	0.0104532
SUFU_Quigley201207_XENLA_00027669	-0.442578	5.03427	12.1527	0.000490181	0.0104532
WNT5B_Audic201207_XENLA_00005441	-0.474313	6.24053	12.1489	0.000491171	0.0104639
U65897.1	0.517831	5.55407	12.1449	0.000492216	0.0104687
CRABP2_Taira201203_XENLA_stage_00159894	-0.785491	3.68203	12.1443	0.000492384	0.0104687
TMEM45A_Ismailoglu201203_XENLA_00025957	-0.499305	6.92008	12.1423	0.000492903	0.0104691
NM_001087159.1	-0.46257	4.34406	12.1395	0.000493652	0.0104691
ATF3_Taira201203_XENLA_tissue_00091862	-0.493648	3.07474	12.1386	0.000493881	0.0104691
DEAF1_Taira201203_XENLA_stage_00075631	-0.684666	2.1349	12.1363	0.000494498	0.0104717
FTSJD2_Park201106_XENLA_00061022	0.452303	3.90947	12.134	0.000495106	0.0104742
NM_001094600.1	-0.445433	4.51451	12.1306	0.000496012	0.0104829
NM_001091554.1	0.767821	1.10708	12.1217	0.000498387	0.0105164
RPA2_Taira201203_XENLA_stage_00208070	-0.61933	1.8517	12.1209	0.000498587	0.0105164
TBCD_Quigley201112_XENLA_00021034	0.732085	1.60113	12.1186	0.000499226	0.0105194
F1NLH9_CHICK_Taira201203_XENLA_stage_00024227	-0.888021	0.0749052	12.1123	0.000500914	0.0105445
POU4F1.2_Taira201203_XENLA_tissue_00159942	0.679686	1.21122	12.0961	0.000505278	0.0106259
NM_001085445.1	-0.442811	4.02009	12.0806	0.000509497	0.010704
TP73_Taira201203_XENLA_stage_00154389	-0.810484	1.54482	12.0573	0.000515908	0.010828
BC081260.1	-0.529347	3.08627	12.0252	0.000524864	0.011005
NM_001086215.1	-0.776193	4.91866	12.0214	0.000525919	0.0110163
FAM91A1_XeXenL6RMv10007762m	0.478645	4.19203	12.0186	0.000526713	0.0110221
CNOT7_Kwon201107_XENLA_00045615	0.519427	2.82156	12.011	0.00052887	0.0110469
NA_Taira201203_XENLA_tissue_00255626	-1.07132	-0.332291	12.0108	0.000528941	0.0110469
NA_TC428795	-0.918729	-0.2535	12.0031	0.000531119	0.0110815
SCRIB.1_Taira201203_XENLA_tissue_00137913	-0.392049	5.88179	11.9969	0.00053288	0.0111052
PRKCI_Ismailoglu201203_XENLA_00001332	-0.579187	2.63049	11.9955	0.0005333	0.0111052
NSD1_Kwon201107_XENLA_00132247	-0.38517	5.57156	11.9918	0.000534341	0.011116
ZNF362_Kwon201107_XENLA_00112530	-0.556478	2.57391	11.9805	0.00053759	0.0111677
NM_001094487.1	0.434745	4.66126	11.9773	0.00053852	0.0111677
NM_001095578.1	-0.671659	4.01579	11.977	0.000538602	0.0111677
DMAP1_Taira201203_XENLA_tissue_00028731	-0.393255	6.05756	11.9759	0.00053893	0.0111677
NA_Taira201203_XENLA_stage_00197069	-0.402135	7.38929	11.9662	0.000541742	0.011215
GADD45B_Taira201203_XENLA_tissue_00071821	-0.813439	1.07025	11.9575	0.00054429	0.0112568
GNG7_Ismailoglu201203_XENLA_00029571	-0.45621	6.5805	11.9372	0.000550231	0.0113686
BC159340.1	-0.736994	2.19258	11.9251	0.000553831	0.0114318
NA_Ismailoglu201203_XENLA_00063576	-0.435984	4.75573	11.9196	0.000555471	0.0114546
PDZD11_TeperekTkacz201202_XENLA_00043143	-0.434692	4.17118	11.9087	0.00055873	0.0115106
ZNF148_Kwon201107_XENLA_00071564	-0.754571	0.872021	11.8987	0.000561746	0.0115615
NA_XeXenL6RMv10041348m	-0.408151	5.34151	11.8938	0.000563202	0.0115735
NM_001088096.1	-0.490775	4.51712	11.8931	0.000563416	0.0115735
DDR2_Taira201203_XENLA_stage_00200722	-0.628852	5.27793	11.8869	0.000565296	0.0116009
GJC2_Taira201203_XENLA_tissue_00059974	-0.609832	4.32164	11.8827	0.000566584	0.0116161
BC072029.1	-0.824062	2.43823	11.8786	0.000567812	0.01163
NM_001097722.1	0.477998	3.45914	11.8753	0.000568829	0.0116396
FST_TC424338	-0.665504	2.74414	11.8603	0.000573443	0.0117227
VGLL4_Quigley201207_XENLA_00119215	-0.377956	6.76401	11.8481	0.000577207	0.0117883
GABARAPL2_XeXenL6RMv10011819m	0.648905	1.3777	11.8437	0.000578583	0.0118051
WDR96_XeXenL6RMv10054461m	-0.720782	1.63082	11.8361	0.00058093	0.0118416
ZNF592_Taira201203_XENLA_stage_00098331	-0.433287	5.31396	11.8316	0.000582335	0.0118479
SMTN_Taira201203_XENLA_tissue_00110126	-0.396157	6.1195	11.8316	0.000582352	0.0118479
FLNA_XeXenL6RMv10016034m	0.353255	6.48763	11.8212	0.000585608	0.0119027
TDH_Taira201203_XENLA_tissue_00068075	-0.585796	4.49046	11.8167	0.000587032	0.0119202
BC070573.1	-0.491276	3.40267	11.8133	0.0005881	0.0119305
WFDC2_Taira201203_XENLA_stage_00126744	-0.579556	2.64983	11.8078	0.000589837	0.0119543
GALNT10_Taira201203_XENLA_stage_00128146	0.358707	6.37238	11.7951	0.000593868	0.0120246
FBXO45_Taira201203_XENLA_tissue_00257514	0.530587	2.55868	11.7921	0.000594812	0.0120322
TCEB3_Ismailoglu201203_XENLA_00059805	-0.385058	7.25265	11.7885	0.000595971	0.0120442
NM_001085585.1	1.12996	-0.158044	11.7866	0.000596591	0.0120452
TACC3_XeXenL6RMv10019573m	-0.584248	4.65625	11.7805	0.000598556	0.0120734
FAM63B_XeXenL6RMv10005885m	0.639074	1.93275	11.7699	0.000601977	0.0121309
BC082670.1	-0.503336	4.05329	11.7641	0.000603856	0.0121532
C8G_Taira201203_XENLA_tissue_00277605	-1.00829	3.05793	11.7629	0.000604228	0.0121532
EMG1_TC450028	-0.3957	5.69914	11.7587	0.00060561	0.0121653
SLC26A11_TeperekTkacz201202_XENLA_00049624	-0.374268	7.85507	11.7575	0.000605975	0.0121653
HEXIM1_Taira201203_XENLA_stage_00032679	-0.398958	6.12038	11.7499	0.000608466	0.0121934
NM_001095677.1	-0.46628	4.25688	11.7497	0.000608522	0.0121934
COL11A1_XeXenL6RMv10002247m	-0.771651	0.856666	11.7289	0.000615355	0.0123187
TNIP2_Kwon201107_XENLA_00078533	-0.546032	2.75458	11.7236	0.000617137	0.0123427
MFSD6_Taira201203_XENLA_stage_00150051	0.560065	2.52798	11.7023	0.000624226	0.0124728
NA_Ismailoglu201203_XENLA_00067267	0.654248	2.2669	11.6721	0.000634432	0.0126648
TP53INP2_Ismailoglu201203_XENLA_00011035	-0.454808	3.74702	11.6704	0.000635031	0.0126648
NM_001086833.1	-0.732338	0.853358	11.6664	0.000636395	0.0126801
NP_001072468.1_TeperekTkacz201202_XENLA_00054452	-0.369971	5.5741	11.6465	0.000643239	0.0128045
DKK1_Amin201106_XENLA_00068887	-0.526369	3.28287	11.6408	0.000645207	0.0128317
MCM4_Ismailoglu201203_XENLA_00043671	-0.61695	3.3465	11.626	0.000650366	0.0129221
NA_XeXenL6RMv10020904m	-0.718361	1.8874	11.6236	0.000651205	0.0129267
X85746.1	-0.665427	0.909012	11.6201	0.000652433	0.012939
CHCHD4_Park201106_XENLA_00092664	-0.797806	0.627646	11.6143	0.000654475	0.0129674
METTL19_Ismailoglu201203_XENLA_00056016	0.497933	4.89845	11.5906	0.000662869	0.0131215
SLC23A2_TeperekTkacz201202_XENLA_00117834	-0.603399	3.2869	11.5867	0.000664252	0.0131366
DEPDC1_Quigley201207_XENLA_00007453	-0.457587	6.58643	11.5687	0.000670729	0.0132437
ERN1_Quigley201207_XENLA_00056460	-0.475184	3.37606	11.5681	0.000670914	0.0132437
STXBP5_Ismailoglu201203_XENLA_00015045	0.468769	3.36881	11.5561	0.000675264	0.0133106
NM_001090747.1	0.401605	8.46624	11.5553	0.000675555	0.0133106
GATAD2A_Park201106_XENLA_00117261	-0.681972	1.33887	11.5492	0.000677798	0.0133397
CDCA2_Taira201203_XENLA_stage_00064576	-0.461194	3.57717	11.5474	0.000678436	0.0133397
NM_001095510.1	-0.483739	3.61105	11.5461	0.000678916	0.0133397
ARHGAP35_TeperekTkacz201206_XENLA_00063302	0.499327	3.67177	11.5368	0.000682312	0.013394
ITGA4_Taira201203_XENLA_stage_00032158	-0.677893	2.32619	11.5278	0.000685622	0.0134465
SLC27A4_Taira201203_XENLA_tissue_00233627	0.547412	2.90316	11.516	0.000689999	0.0135099
FAM110A_Taira201203_XENLA_tissue_00106949	-0.432779	3.98369	11.5129	0.000691135	0.0135099
SOCS2_Taira201203_XENLA_stage_00203411	-0.907731	0.547614	11.5126	0.000691255	0.0135099
LRP2_Quigley201112_XENLA_00003456	-0.740557	1.85906	11.5122	0.000691397	0.0135099
C13ORF23_XeXenL6RMv10041100m	-0.537599	5.86342	11.5094	0.000692456	0.0135182
NM_001090246.1	-0.439386	4.28914	11.4845	0.000701794	0.0136879
PFKP_Taira201203_XENLA_tissue_00191455	0.702277	1.39201	11.4709	0.00070694	0.0137756
BC074414.1	-0.504244	3.5656	11.4679	0.000708085	0.0137853
RASSF3_Kwon201107_XENLA_00018395	0.412508	4.52853	11.4569	0.000712307	0.0138548
KIF22_TC436582	-0.315753	8.35578	11.4494	0.000715174	0.0138978
MYOM2_Quigley201207_XENLA_00103472	0.843678	2.2538	11.403	0.000733249	0.014236
DPH2_TC416284	-0.455521	4.08698	11.3978	0.0007353	0.0142628
TMEM101_XeXenL6RMv10029759m	0.5115	2.57272	11.3951	0.000736363	0.0142704
OSBPL11_TC415920	0.422536	4.72926	11.3869	0.00073964	0.0143208
PIGC_Ismailoglu201203_XENLA_00040080	0.684662	1.2754	11.3798	0.000742473	0.0143626
DUS3L_TeperekTkacz201206_XENLA_00102096	-0.774198	0.45085	11.3674	0.000747446	0.0144456
ANUBL1_Taira201203_XENLA_tissue_00036858	-0.539417	3.04988	11.3639	0.000748862	0.0144598
ZNF574_Taira201203_XENLA_stage_00011081	-0.638846	1.05703	11.3592	0.000750758	0.0144833
SI_CH211-110P13.9_Kwon201107_XENLA_00018627	-0.864021	0.187398	11.3529	0.000753311	0.0145194
BX000999.6_Ismailoglu201203_XENLA_00000418	-0.470013	4.63735	11.3471	0.000755675	0.0145517
NM_001093709.1	-0.501667	2.96046	11.3452	0.000756416	0.0145522
FUT1_Kwon201107_XENLA_00117946	-0.650674	1.45885	11.3395	0.00075875	0.0145522
RNF185_Taira201203_XENLA_tissue_00224321	0.694052	1.45986	11.3391	0.000758936	0.0145522
RBFOX2_Taira201203_XENLA_stage_00061931	-0.512572	7.87976	11.3387	0.000759074	0.0145522
NA_TeperekTkacz201202_XENLA_00137661	-0.573211	7.4237	11.3386	0.000759127	0.0145522
NM_001091226.1	-0.328379	7.24782	11.3325	0.000761639	0.0145872
SLC16A9_TeperekTkacz201202_XENLA_00151336	-0.805332	3.14412	11.3289	0.000763084	0.0146017
BC074474.1	-0.440083	4.69263	11.3269	0.000763921	0.0146046
NA_Park201106_XENLA_00014931	0.54449	2.2255	11.3251	0.000764667	0.0146057
NA_Chung201110_XENLA_00079561	-0.547	2.94379	11.3196	0.000766941	0.014636
CDK5R1_Audic201207_XENLA_00007059	-0.501623	5.48323	11.3153	0.000768705	0.0146564
NM_001085936.1	-0.356023	6.69067	11.3136	0.000769394	0.0146564
PLK2_Taira201203_XENLA_tissue_00181055	0.359266	7.23959	11.3107	0.000770604	0.0146629
NA_Park201106_XENLA_00086077	-0.391382	6.85623	11.3095	0.000771115	0.0146629
NA_TC419739	-0.635601	3.06244	11.3028	0.000773886	0.0147024
NM_001089885.1	-0.488693	4.40978	11.2967	0.000776433	0.0147377
NPC1_Taira201203_XENLA_tissue_00139551	0.326673	6.74395	11.2931	0.000777952	0.0147437
NA_Taira201203_XENLA_tissue_00267341	-0.58959	4.04571	11.2927	0.000778141	0.0147437
NA_Ismailoglu201203_XENLA_00013758	0.600052	2.61557	11.2875	0.000780307	0.0147716
PTCH2_TC413755	-0.5188	3.93766	11.2795	0.000783669	0.014822
ADAMTS18_XeXenL6RMv10025329m	-0.971817	-0.480443	11.2763	0.000785013	0.0148342
TP73_Quigley201207_XENLA_00055249	-0.863374	1.33581	11.2589	0.000792439	0.0149612
NM_001095251.1	0.656124	0.94182	11.2549	0.000794142	0.0149759
C18ORF25_Ismailoglu201203_XENLA_00058570	-0.395257	6.00214	11.2537	0.000794625	0.0149759
NOC4L_TeperekTkacz201202_XENLA_00077567	-0.369603	6.09007	11.2392	0.000800893	0.0150806
NA_Amin201106_XENLA_00065629	-0.469026	4.43662	11.236	0.000802245	0.0150927
MDM2_Ismailoglu201203_XENLA_00061590	0.354717	6.93689	11.2323	0.000803847	0.0151095
TMEM39A_XeXenL6RMv10038080m	-0.420944	6.16829	11.2297	0.000804994	0.0151177
CACNB4_XeXenL6RMv10042997m	-0.719952	1.15692	11.2211	0.000808746	0.0151747
NA_Taira201203_XENLA_tissue_00159302	-0.412347	4.52305	11.2191	0.000809609	0.0151775
NM_001087157.1	-0.366643	5.72176	11.2153	0.000811253	0.0151949
BC072868.1	0.431141	4.37185	11.2089	0.00081405	0.0152339
BC130163.1	-0.406599	4.43785	11.1995	0.000818189	0.0152906
C16ORF57_Taira201203_XENLA_tissue_00066510	-0.387411	5.36155	11.1988	0.000818522	0.0152906
NM_001088631.1	-0.472714	3.7481	11.1954	0.000820025	0.0153052
NM_001094990.1	0.720949	1.27666	11.1935	0.000820839	0.015307
NP_001121531.1_Taira201203_XENLA_stage_00021116	0.545959	3.25806	11.1915	0.000821747	0.0153104
NM_001095955.1	-0.438393	5.13552	11.1815	0.000826191	0.0153797
RBMX_Taira201203_XENLA_stage_00060893	0.350557	6.25023	11.174	0.000829517	0.015415
CSPG4_XeXenL6RMv10007374m	-0.610145	2.0782	11.174	0.000829536	0.015415
HIF1AN_Taira201203_XENLA_stage_00022811	0.418069	4.61359	11.1711	0.000830817	0.0154253
CRAMP1L_Kwon201107_XENLA_00052998	-0.640749	1.29235	11.1685	0.000831956	0.015433
NA_Taira201203_XENLA_stage_00026622	-0.330229	6.83228	11.1447	0.000842702	0.0156187
NM_001091045.1	-0.523922	5.11514	11.1233	0.000852484	0.015777
MED11_XeXenL6RMv10026210m	-0.42717	5.12973	11.1228	0.00085273	0.015777
GPANK1_TeperekTkacz201206_XENLA_00112476	-0.758564	0.256567	11.1188	0.000854569	0.0157972
HES3.1_Ismailoglu201203_XENLA_00072500	-0.39285	5.55751	11.099	0.000863756	0.0159532
BC074211.1	0.583337	1.66065	11.0934	0.000866364	0.0159818
ENC1.2_XeXenL6RMv10044893m	-0.452854	4.4016	11.0924	0.000866809	0.0159818
DPYSL3_mgEST_Xl4jul2012_1013252071	-0.840839	0.984797	11.0763	0.000874394	0.0161051
DIRC2_TeperekTkacz201202_XENLA_00027105	-0.330202	6.93453	11.075	0.000875014	0.0161051
BC087471.1	-0.371644	5.66916	11.0645	0.000879966	0.0161822
KCNK5_Taira201203_XENLA_tissue_00223642	-0.382343	5.66841	11.047	0.000888309	0.0163215
MCM5_XeXenL6RMv10045457m	-0.472437	3.09532	11.0442	0.000889629	0.016327
IFT140_Ismailoglu201203_XENLA_00010316	0.461267	3.96475	11.0432	0.000890145	0.016327
BC126009.1	0.536804	2.6384	11.019	0.000901828	0.016527
ACAP3_Kwon201107_XENLA_00059556	-0.625349	5.30019	11.0152	0.000903661	0.0165463
BRD8_Taira201203_XENLA_stage_00113401	-0.428313	4.04243	11.0033	0.000909481	0.0166289
BC123196.1	-0.655436	1.13642	11.0028	0.000909736	0.0166289
XIAP_Quigley201207_XENLA_00004298	-0.480559	5.32243	10.9994	0.000911419	0.0166332
ANKRD12_Taira201203_XENLA_tissue_00273832	0.412446	4.24381	10.9991	0.000911539	0.0166332
GALNT12_Taira201203_XENLA_tissue_00275548	-0.688957	3.3655	10.9933	0.000914428	0.0166716
TOMM7_Ismailoglu201203_XENLA_00031439	-0.405321	4.72251	10.9887	0.000916711	0.0166989
ALDH4A1_Quigley201207_XENLA_00103820	0.362174	5.82848	10.971	0.000925485	0.0168443
RSBN1L_XeXenL6RMv10022313m	0.443338	3.67264	10.9685	0.000926758	0.016853
GYLTL1B_TC416302	-0.384446	5.36586	10.9647	0.000928641	0.0168728
DSEL_Kwon201107_XENLA_00003761	-0.560296	1.99861	10.9561	0.000932979	0.0169111
NA_Kwon201107_XENLA_00019227	-0.534966	2.07166	10.956	0.000933029	0.0169111
CHERP_Taira201203_XENLA_tissue_00059819	-0.332413	6.69862	10.9557	0.000933137	0.0169111
RHBDF2_Quigley201112_XENLA_00136006	-0.500719	3.74724	10.9541	0.00093398	0.016912
PDZK1_Taira201203_XENLA_tissue_00268900	0.822534	0.430186	10.9155	0.000953617	0.0172528
RPL10_XeXenL6RMv10012352m	-0.606285	1.45389	10.9104	0.000956271	0.0172861
USF2_Taira201203_XENLA_tissue_00135897	-0.35708	5.9866	10.8957	0.000963896	0.0174091
CDK16_Taira201203_XENLA_tissue_00223089	0.476776	2.96541	10.8856	0.000969124	0.0174887
TFAP2A_TeperekTkacz201206_XENLA_00051095	0.294116	8.48324	10.8698	0.000977459	0.0176241
BC077928.1	-0.349175	5.89752	10.8607	0.000982255	0.0176866
KIAA1267_Taira201203_XENLA_tissue_00231445	-0.431771	4.796	10.8545	0.000985583	0.0176866
NM_001089937.1	-0.466009	3.89575	10.8541	0.000985761	0.0176866
SLC50A1_Park201106_XENLA_00131543	-0.486139	2.96038	10.8539	0.000985873	0.0176866
PSD3_Ismailoglu201203_XENLA_00057278	-0.66565	0.814447	10.8531	0.000986289	0.0176866
BC129512.1	-0.542391	2.29524	10.8524	0.000986682	0.0176866
CFH_TeperekTkacz201206_XENLA_00005002	-0.793181	2.84993	10.8523	0.000986752	0.0176866
NA_TeperekTkacz201206_XENLA_00097114	-1.74242	0.042839	10.8463	0.000989951	0.017729
RAB3D_Amin201106_XENLA_00009304	-0.657565	3.86211	10.826	0.00100087	0.0179095
NA_Taira201203_XENLA_tissue_00024108	0.478564	4.08616	10.816	0.00100626	0.0179906
RPS15_Taira201203_XENLA_stage_00133253	-0.362541	5.75988	10.7953	0.00101756	0.0181774
ALG14_Quigley201207_XENLA_00053143	-0.733526	0.283547	10.7909	0.00102001	0.0182059
DQ096854.1	-0.587567	1.99123	10.7881	0.00102154	0.0182178
CLDN3_TC463063	-0.986023	0.286044	10.7586	0.00103797	0.0184954
WDR12_Taira201203_XENLA_stage_00106678	-0.530663	4.11015	10.7563	0.00103925	0.0185026
NM_001099911.1	-0.578721	2.80139	10.7492	0.00104327	0.0185587
LAMA5_Taira201203_XENLA_stage_00136826	-0.523729	6.61113	10.739	0.00104902	0.0186367
NCBP1_Taira201203_XENLA_stage_00010821	-0.371868	5.47279	10.7383	0.00104941	0.0186367
MAN2A2_TC414011	0.425176	4.04789	10.7193	0.00106023	0.0188039
SEPN1_Taira201203_XENLA_stage_00189777	-0.420044	4.44493	10.7187	0.0010606	0.0188039
NM_001112873.1	0.465851	4.07104	10.6995	0.00107166	0.0189843
TRAPPC10_Ismailoglu201203_XENLA_00008282	0.440541	4.29517	10.6979	0.00107259	0.0189848
NM_001092084.1	-0.63091	3.24654	10.6725	0.0010874	0.0192309
SCOC_Quigley201112_XENLA_00118327	0.593652	1.77206	10.6641	0.00109237	0.0192888
TEF_Taira201203_XENLA_stage_00200073	0.377035	5.97621	10.6639	0.00109248	0.0192888
BC133793.1	-0.628733	1.63563	10.6379	0.00110795	0.0195456
ASTE1_XeXenL6RMv10047408m	-0.854543	-0.0531211	10.6185	0.00111961	0.0197348
CYP1A1_Taira201203_XENLA_tissue_00087286	-0.541484	3.00528	10.6135	0.00112268	0.019764
SUOX_Kwon201107_XENLA_00104491	-0.396936	5.43756	10.6127	0.00112312	0.019764
ATG4B_Taira201203_XENLA_tissue_00268259	0.475914	3.11089	10.6053	0.00112765	0.0198272
BC108439.1	-0.468413	4.17681	10.6021	0.0011296	0.0198452
NA_XeXenL6RMv10031635m	-0.629101	1.9908	10.6003	0.00113069	0.0198478
RBM18_Park201106_XENLA_00154341	-0.697231	0.445658	10.5775	0.00114474	0.0200716
BC084641.1	-0.462975	4.01904	10.5765	0.00114533	0.0200716
NA_TC436365	-0.404128	4.54711	10.5744	0.00114664	0.0200781
DHX16_Ismailoglu201203_XENLA_00062866	-0.391222	6.73969	10.5583	0.00115666	0.0202368
CDK8_TeperekTkacz201206_XENLA_00043019	0.418666	4.65942	10.5468	0.00116388	0.0203463
NM_001097833.1	-0.437083	3.78355	10.5431	0.0011662	0.0203702
ATXN7_Taira201203_XENLA_stage_00176887	-0.413704	4.38338	10.5376	0.00116967	0.020414
WTAP_Taira201203_XENLA_stage_00043672	-0.732041	1.12228	10.5337	0.00117217	0.0204267
AB602929.1	-0.94034	0.84924	10.5335	0.00117232	0.0204267
NM_001127789.1	-0.558721	3.49372	10.5312	0.00117375	0.0204349
NM_001090342.1	-0.330106	6.57941	10.517	0.00118283	0.0205761
NM_001088989.1	-0.469789	5.69702	10.5077	0.0011888	0.020663
AMOTL2_TeperekTkacz201206_XENLA_00108531	-0.444919	6.39138	10.5014	0.00119287	0.0207167
IFNGR2.1_Horb201201_XENLA_00143673	0.603619	1.49263	10.4982	0.00119493	0.0207355
CD274_XeXenL6RMv10001387m	-0.535246	2.19237	10.4932	0.00119815	0.0207717
NA_Chung201110_XENLA_00014361	-0.539397	4.30373	10.4919	0.00119897	0.0207717
NM_001097046.1	-0.678199	2.60734	10.4793	0.00120716	0.0208931
MCM6.2_XeXenL6RMv10032544m	-0.477498	6.1958	10.4782	0.00120794	0.0208931
RAB11FIP4L_TeperekTkacz201202_XENLA_00072688	-0.483069	2.6566	10.4738	0.00121079	0.0209253
PIK3CA_Park201106_XENLA_00061584	0.46137	3.29505	10.471	0.00121261	0.0209397
C20ORF151_Taira201203_XENLA_stage_00108353	-0.877365	0.39644	10.4514	0.00122555	0.0211146
TMM93_XENTR_Audic201207_XENLA_00003169	-0.382924	5.01421	10.4512	0.00122571	0.0211146
MANF_Audic201207_XENLA_00007317	-0.374546	4.97294	10.4512	0.00122572	0.0211146
TBX1_TC416295	-0.768787	3.18424	10.4479	0.0012279	0.0211351
NM_001086193.1	-0.332652	6.9987	10.4451	0.00122974	0.0211495
CDC34_Taira201203_XENLA_tissue_00252495	-0.409155	6.29902	10.4266	0.00124211	0.0213449
KIAA1614_Taira201203_XENLA_tissue_00286533	-0.561032	4.1866	10.4137	0.00125085	0.0214778
PAFAH1B3_mgEST_Xl4jul2012_1013089719	-0.410079	5.31903	10.401	0.00125945	0.0216081
TCF3_Ismailoglu201203_XENLA_00061101	-0.368559	9.09993	10.3989	0.00126092	0.0216158
LMO4.2_XeXenL6RMv10029643m	-0.444169	7.60336	10.396	0.00126292	0.0216326
DIRAS3_Taira201203_XENLA_tissue_00235335	-0.606492	2.01586	10.3768	0.00127607	0.0218403
TTC12_Quigley201207_XENLA_00021951	-0.91071	0.863473	10.3679	0.00128227	0.0219287
XB-GENE-5805799_Ismailoglu201203_XENLA_00037319	-0.340653	6.1736	10.3621	0.00128629	0.0219798
VPS37B_TC416176	0.376536	6.98115	10.358	0.00128913	0.0220106
IMPA1_Audic201207_XENLA_00007426	-0.468317	2.84266	10.3467	0.00129706	0.0221282
ARL6IP6_Park201106_XENLA_00126560	-0.804439	0.376221	10.3334	0.00130645	0.0222705
EFHC1_Taira201203_XENLA_tissue_00201917	-0.519276	3.40595	10.3253	0.00131217	0.0223501
RPS9_TC426070	-0.365139	6.28297	10.3186	0.00131697	0.0224137
ST6GALNAC2_Ismailoglu201203_XENLA_00009372	-0.398783	5.69387	10.3066	0.00132555	0.0225417
NA_Taira201203_XENLA_stage_00088482	-0.494919	3.27342	10.2997	0.00133052	0.022587
BC044114.1	-0.395173	5.71792	10.2995	0.00133069	0.022587
DPP8_Taira201203_XENLA_stage_00039872	0.411438	4.20819	10.2985	0.0013314	0.022587
RAI14_Taira201203_XENLA_stage_00102979	-0.599216	1.68431	10.2963	0.001333	0.022596
NM_001087265.1	-0.67065	1.67411	10.2748	0.00134862	0.0228427
NA_Quigley201112_XENLA_00056968	-0.366975	5.78334	10.268	0.00135355	0.0229079
CFP_Amin201106_XENLA_00097696	-0.467004	3.05747	10.2649	0.00135588	0.0229291
HTATSF1_XeXenL6RMv10028640m	-0.623524	1.08093	10.2603	0.00135921	0.0229671
GLTSCR2_Ismailoglu201203_XENLA_00072705	-0.543703	1.79326	10.2564	0.00136212	0.0229979
MAP1LC3A_Amin201106_XENLA_00042927	-0.463921	4.84403	10.2513	0.0013659	0.0230175
PAICS.1_Taira201203_XENLA_stage_00186930	-1.04979	0.55727	10.2506	0.0013664	0.0230175
NA_Horb201201_XENLA_00010666	-0.639529	4.50798	10.2504	0.00136653	0.0230175
LZTS1_Ismailoglu201203_XENLA_00050280	-0.474478	3.45957	10.239	0.00137503	0.0231423
SOX9_Kwon201107_XENLA_00126742	-0.516566	2.38862	10.2297	0.00138195	0.0232352
Q5ZI60_CHICK_Taira201203_XENLA_tissue_00104456	-0.446723	3.00864	10.2266	0.00138429	0.0232352
LRRC59_XeXenL6RMv10039769m	-0.360175	5.45524	10.2258	0.00138487	0.0232352
NA_TC422377	0.436387	4.31474	10.2258	0.00138492	0.0232352
B0JZZ7_XENTR_Taira201203_XENLA_stage_00039715	-0.361142	5.71817	10.2222	0.00138759	0.0232556
NM_001086081.1	-0.344587	6.31662	10.2212	0.00138833	0.0232556
PQBP1_Taira201203_XENLA_tissue_00206984	-0.461926	2.8269	10.2135	0.00139415	0.0233312
SLC18A3_XeXenL6RMv10013902m	-1.13628	-1.04792	10.2107	0.00139626	0.0233312
TSPAN1_Taira201203_XENLA_stage_00032067	-0.367541	7.24597	10.2104	0.00139653	0.0233312
ATXN1L_XeXenL6RMv10043515m	0.453726	2.95977	10.2094	0.00139723	0.0233312
RPL22_Park201106_XENLA_00091392	-0.580836	1.698	10.2072	0.00139891	0.0233409
C11ORF74_Taira201203_XENLA_tissue_00264652	-0.560505	2.68193	10.2021	0.00140278	0.0233871
FBXL18_XeXenL6RMv10022567m	0.537477	2.23825	10.1981	0.00140585	0.0234199
NA_XeXenL6RMv10006000m	-0.585167	4.1386	10.1943	0.00140878	0.0234502
NM_001096883.1	-0.555681	5.76258	10.1882	0.0014134	0.0235088
PRPF19_TC430436	-0.30315	7.8694	10.1785	0.00142086	0.0236142
EIF4E2_Taira201203_XENLA_stage_00047962	-0.384318	5.09243	10.1771	0.00142198	0.0236145
E2F8_TeperekTkacz201206_XENLA_00094528	-0.293667	8.89331	10.173	0.00142511	0.0236479
NM_001090189.1	-0.490792	2.95576	10.1648	0.0014315	0.0237354
NM_001096528.1	-0.358548	6.13436	10.1578	0.00143696	0.0238057
NM_001086585.1	-0.441033	4.10627	10.1558	0.00143846	0.0238057
NM_001092475.1	0.977709	-0.551723	10.155	0.0014391	0.0238057
AGFG1_TC425960	0.397305	4.86115	10.1487	0.00144407	0.0238528
NM_001092624.1	0.364747	6.07434	10.1485	0.00144419	0.0238528
NA_TeperekTkacz201206_XENLA_00013302	1.03871	-0.860353	10.1386	0.00145197	0.0239496
NM_001096013.1	-0.369242	6.26756	10.1371	0.00145316	0.0239496
NKX3-1_XeXenL6RMv10015605m	-0.524696	2.33063	10.1367	0.00145344	0.0239496
SRI_XeXenL6RMv10026014m	-0.782119	0.376398	10.1287	0.00145977	0.0240353
PCDH19_Taira201203_XENLA_tissue_00230375	-0.547607	5.29058	10.1224	0.00146475	0.0240986
ZFR_XeXenL6RMv10008510m	-0.334123	6.33081	10.1175	0.00146871	0.0241421
NA_Audic201207_XENLA_00007146	-0.454027	4.21938	10.1159	0.00146998	0.0241421
PTPN9_Taira201203_XENLA_stage_00170235	-0.502059	3.81384	10.1148	0.0014708	0.0241421
NA_Ismailoglu201203_XENLA_00029357	0.75605	0.733694	10.1071	0.00147702	0.0242254
NM_001094029.1	-0.346159	6.15852	10.1028	0.00148041	0.0242622
NA_TeperekTkacz201202_XENLA_00095957	-0.489364	2.74501	10.099	0.00148353	0.0242946
BC077252.1	-0.346136	5.84019	10.0928	0.00148851	0.0243574
TNFRSF1A_Taira201203_XENLA_tissue_00109777	-0.709359	0.98307	10.0901	0.00149068	0.0243608
ANKRD9_Taira201203_XENLA_tissue_00238668	0.477963	3.01518	10.0897	0.00149101	0.0243608
CIRH1A_Kwon201107_XENLA_00123950	-0.423866	3.89423	10.0867	0.00149342	0.0243814
CNTN1_Taira201203_XENLA_tissue_00134660	-0.646821	3.87998	10.0836	0.00149592	0.0243859
TTLL13_Quigley201207_XENLA_00027749	-0.793677	1.58001	10.0836	0.00149599	0.0243859
RAB11A_Kwon201107_XENLA_00116362	0.389842	5.40931	10.0588	0.00151623	0.0246968
NM_001097968.1	-0.345704	6.9696	10.054	0.00152015	0.0247418
HNF1B_TC445330	-0.5947	4.32126	10.0455	0.00152719	0.0248373
FAM69A_Ismailoglu201203_XENLA_00034185	-0.466457	4.47324	10.0317	0.0015387	0.0250004
KCP_Taira201203_XENLA_tissue_00271249	-0.552577	2.62697	10.0306	0.00153957	0.0250004
PRC1.2_Kwon201107_XENLA_00004143	-0.427823	4.61454	10.0154	0.00155239	0.0251893
NP_001090695.1_Taira201203_XENLA_stage_00185591	0.558588	1.75578	10.0056	0.00156069	0.0253046
ARHGEF3.2_Quigley201207_XENLA_00104481	-0.475777	4.2017	9.99759	0.00156745	0.0253948
AGGF1_Taira201203_XENLA_stage_00063114	0.515017	2.22779	9.99471	0.00156991	0.0254153
NM_001096777.1	0.457402	3.51797	9.98708	0.00157642	0.025499
NA_Ismailoglu201203_XENLA_00036510	-0.341302	6.27709	9.98585	0.00157748	0.025499
CLCN3_Ismailoglu201203_XENLA_00041872	-0.404852	5.20854	9.97629	0.00158569	0.0256122
RRP15_Taira201203_XENLA_stage_00142265	-0.324756	6.60153	9.96983	0.00159126	0.0256826
F7ALI0_XENTR_Kwon201107_XENLA_00015519	-0.516661	6.24679	9.9667	0.00159397	0.0257068
PCIF1_Quigley201112_XENLA_00004979	-0.411776	5.30534	9.95882	0.0016008	0.0257974
PSMC2_TC450223	-0.389281	4.34844	9.95613	0.00160315	0.0258157
SMYD4_Taira201203_XENLA_tissue_00104910	-0.527833	2.07559	9.94882	0.00160952	0.0258987
MARCH6_XeXenL6RMv10046796m	-0.456098	4.40792	9.94346	0.00161422	0.0259546
MGAT2_Taira201203_XENLA_stage_00007321	0.759659	0.241987	9.93838	0.00161868	0.0260066
EFCAB7_Park201106_XENLA_00008174	-0.626342	1.54627	9.92402	0.00163136	0.0261728
CPXM2_Ismailoglu201203_XENLA_00066963	-0.470674	2.53116	9.92305	0.00163222	0.0261728
NA_Kwon201107_XENLA_00002594	-0.612589	2.28651	9.92248	0.00163272	0.0261728
NM_001090252.1	-0.44312	4.0188	9.91674	0.00163782	0.0262151
MTA1_XeXenL6RMv10043598m	-0.379977	5.7175	9.91673	0.00163783	0.0262151
SIRT3.2_Taira201203_XENLA_tissue_00206304	-0.913454	-0.407876	9.91037	0.0016435	0.026286
NA_Taira201203_XENLA_stage_00031421	-0.483471	4.15174	9.90716	0.00164637	0.0263122
RANGAP1_Taira201203_XENLA_stage_00127157	-0.409965	4.74014	9.90275	0.00165032	0.0263382
NM_001097050.1	-0.340751	5.92322	9.90257	0.00165048	0.0263382
C9ORF16_Taira201203_XENLA_stage_00158851	0.522271	2.26255	9.89477	0.00165749	0.0264178
GMPPB_Ismailoglu201203_XENLA_00010693	-0.370755	5.30188	9.89382	0.00165835	0.0264178
BC094120.1	-0.58721	2.98332	9.89222	0.00165979	0.0264178
SBNO1_Veenstra201204_XENLA_00007944	-0.482697	3.80198	9.8915	0.00166044	0.0264178
AF096301.1	-0.852659	-0.154741	9.88969	0.00166208	0.026424
SNX4_Taira201203_XENLA_tissue_00223878	0.456788	2.99258	9.87122	0.00167884	0.0266705
QRICH1.1_Taira201203_XENLA_tissue_00062091	0.377767	5.2052	9.86707	0.00168263	0.0267108
RYK_Ismailoglu201203_XENLA_00035022	-0.305722	7.67797	9.86494	0.00168458	0.0267218
ARHGEF2_Quigley201207_XENLA_00112023	-0.425143	5.72523	9.86073	0.00168844	0.0267631
HOMEZ_Quigley201112_XENLA_00006988	-0.722764	0.64881	9.85421	0.00169443	0.026838
C15ORF17_Quigley201112_XENLA_00125437	-0.450922	4.12379	9.85076	0.00169761	0.0268593
NM_001096550.1	-0.405143	4.7539	9.84963	0.00169866	0.0268593
CYC1_Audic201207_XENLA_00000343	0.300199	7.31957	9.84846	0.00169974	0.0268593
NA_Audic201207_XENLA_00004854	-0.68191	3.6654	9.84727	0.00170084	0.0268593
C19ORF70_Kwon201107_XENLA_00106085	-0.54303	2.30233	9.84534	0.00170263	0.0268676
NM_001093364.1	-0.511715	2.83293	9.82853	0.00171825	0.0270941
ADCK1_Taira201203_XENLA_stage_00047338	-0.601653	2.0469	9.82562	0.00172097	0.0271168
NM_001086008.1	-0.627343	1.64838	9.81941	0.0017268	0.0271729
BC106619.1	-0.319499	7.0112	9.8191	0.00172709	0.0271729
NFE2L3_TeperekTkacz201202_XENLA_00157367	-0.482968	3.45983	9.81148	0.00173426	0.0272655
DPYSL4_Taira201203_XENLA_tissue_00137761	-0.620199	2.24829	9.80434	0.001741	0.027337
CMTM8_Quigley201207_XENLA_00049952	-0.497684	5.46348	9.80293	0.00174234	0.027337
BC078022.1	0.316041	6.35934	9.80259	0.00174267	0.027337
PSMG3_Taira201203_XENLA_tissue_00012564	-0.510298	2.01019	9.78515	0.00175927	0.027577
JAGN1_XeXenL6RMv10039934m	-0.420685	3.61903	9.76786	0.00177589	0.027817
WDR20_Taira201203_XENLA_tissue_00163348	0.5514	2.39875	9.76492	0.00177873	0.027841
TMEM238_Taira201203_XENLA_tissue_00047788	-0.49338	2.84701	9.76278	0.00178081	0.0278521
OTX1_Taira201203_XENLA_tissue_00116631	-0.467467	3.23194	9.76091	0.00178262	0.0278521
ETHE1_XeXenL6RMv10039717m	0.481841	3.73957	9.76013	0.00178338	0.0278521
NA_TeperekTkacz201202_XENLA_00039118	-0.77691	1.22301	9.75688	0.00178653	0.027875
AACS_XeXenL6RMv10014863m	0.558846	1.927	9.75592	0.00178746	0.027875
NP_001072836.1_XeXenL6RMv10045185m	0.694904	0.637772	9.74531	0.00179781	0.0280013
NM_001086005.1	-0.436111	4.60322	9.74491	0.0017982	0.0280013
UBE2C_Quigley201207_XENLA_00112784	-0.464587	2.94975	9.73036	0.00181249	0.0282031
MTTP.2_Kwon201107_XENLA_00063385	-0.742277	0.0548764	9.72544	0.00181734	0.028245
FLVCR2_Taira201203_XENLA_tissue_00287319	-0.582444	1.25971	9.72495	0.00181784	0.028245
LMO4.2_TeperekTkacz201202_XENLA_00076348	-0.541221	3.06425	9.72152	0.00182123	0.0282629
BC155933.1	0.561607	2.05341	9.71887	0.00182385	0.0282629
COQ10A_Quigley201207_XENLA_00096393	0.467053	2.76549	9.71679	0.00182593	0.0282629
MRPL40_Ismailoglu201203_XENLA_00012139	-0.33721	5.84715	9.71636	0.00182635	0.0282629
PRPS1L3_TeperekTkacz201202_XENLA_00003065	-0.354086	5.5979	9.71599	0.00182671	0.0282629
BC072776.1	-0.401757	5.7779	9.71573	0.00182698	0.0282629
CU694254.1_TeperekTkacz201202_XENLA_00085915	-2.04305	1.17195	9.71307	0.00182962	0.0282659
CRABP2_TeperekTkacz201206_XENLA_00064863	-0.50866	6.19242	9.71286	0.00182983	0.0282659
NM_001093335.1	-0.928777	-0.20692	9.70854	0.00183414	0.0283119
NA_XeXenL6RMv10047763m	-0.409889	4.19708	9.70576	0.00183691	0.0283341
KCTD15_XeXenL6RMv10044773m	-0.47138	3.27097	9.69819	0.0018445	0.0284304
NA_Taira201203_XENLA_tissue_00185520	-0.814807	2.68864	9.69056	0.00185217	0.0285147
NA_TC437796	0.880599	0.741616	9.69008	0.00185265	0.0285147
MEF2D_TC416990	-0.605168	4.56797	9.68325	0.00185955	0.0286002
WNT8A_TeperekTkacz201206_XENLA_00098609	-0.440087	4.9428	9.67702	0.00186587	0.0286703
MAP2K6_TC415103	-0.417483	6.57304	9.6761	0.00186681	0.0286703
H1F0_TC441782	0.491459	2.73215	9.66669	0.00187639	0.0287966
ARHGEF17_XeXenL6RMv10041288m	-0.569202	1.82817	9.66314	0.00188002	0.0288315
MFAP2_Amin201106_XENLA_00076701	-0.75235	2.27876	9.65973	0.00188351	0.0288642
AC004017.1_TC447280	0.38778	4.87368	9.65679	0.00188653	0.0288736
UTP15_XeXenL6RMv10010501m	-0.423183	4.50051	9.65617	0.00188716	0.0288736
NM_001091208.1	0.631117	1.06918	9.6546	0.00188878	0.0288736
ST3GAL2.1_XeXenL6RMv10021617m	-0.807235	0.573725	9.65384	0.00188956	0.0288736
NRARP_TC416603	-0.304979	8.96173	9.65041	0.0018931	0.0289068
TMEM111_Taira201203_XENLA_stage_00184345	-0.411481	4.00514	9.64589	0.00189775	0.028941
KIFC3_Ismailoglu201203_XENLA_00057636	-0.360822	5.73874	9.6456	0.00189806	0.028941
NM_001086969.1	-0.582388	6.20361	9.62931	0.00191496	0.0291778
SLC5A7_Taira201203_XENLA_tissue_00056034	0.860811	-0.20334	9.62082	0.00192384	0.029292
PDCD7_Kwon201107_XENLA_00127644	-0.346875	5.37339	9.61291	0.00193214	0.0293974
TM2D2_Taira201203_XENLA_tissue_00268450	-0.708201	0.366525	9.6026	0.00194303	0.0295294
NA_TeperekTkacz201206_XENLA_00015080	0.615003	1.47679	9.60205	0.0019436	0.0295294
NLRC4_Taira201203_XENLA_stage_00044876	-0.568162	5.80546	9.60024	0.00194552	0.0295374
C7ORF70_Taira201203_XENLA_stage_00093535	-0.529192	2.55359	9.5983	0.00194758	0.0295476
SMG5_Taira201203_XENLA_stage_00202793	0.382965	5.12447	9.59076	0.00195559	0.0296479
NBL1_TC443291	-0.349079	5.37158	9.5876	0.00195896	0.0296778
C1ORF9_Kwon201107_XENLA_00050612	0.391455	4.30779	9.5842	0.00196259	0.0297116
NM_001086409.1	0.380807	5.62502	9.5767	0.00197062	0.029812
KIAA1161_Kwon201107_XENLA_00093459	-0.355957	5.49169	9.57242	0.00197523	0.0298604
TMEM45B_Ismailoglu201203_XENLA_00033015	-0.460479	6.24037	9.56652	0.00198158	0.0299351
NM_001096803.1	-0.448091	3.35248	9.56033	0.00198827	0.0300149
DFNA5_Taira201203_XENLA_stage_00195344	-0.484702	2.27522	9.55776	0.00199106	0.030033
ISCA1_Taira201203_XENLA_stage_00011649	0.325422	5.88269	9.55661	0.0019923	0.030033
Q28EV0_XENTR_Taira201203_XENLA_stage_00130345	-0.412281	3.66767	9.55055	0.00199889	0.030111
NM_001087097.1	-0.409116	5.78139	9.54118	0.00200912	0.0302436
TRIL_Taira201203_XENLA_stage_00128312	-0.786107	2.68696	9.53709	0.00201361	0.0302603
NM_001094880.1	0.589448	1.35625	9.53693	0.00201378	0.0302603
BMPER_TC418159	-0.638159	3.16455	9.53628	0.0020145	0.0302603
NRF1_Taira201203_XENLA_tissue_00200733	-0.352597	5.95599	9.52849	0.00202306	0.0303674
NA_Kwon201107_XENLA_00075359	0.573508	1.93857	9.48572	0.00207078	0.0310352
FBRS_Ismailoglu201203_XENLA_00031689	-0.290616	7.50131	9.48474	0.00207188	0.0310352
ARHGAP33_XeXenL6RMv10006512m	-0.507294	1.94253	9.48469	0.00207194	0.0310352
NM_001091655.1	-0.357058	5.13588	9.48103	0.00207608	0.0310753
U09632.1	-0.701784	2.00315	9.47734	0.00208025	0.0311159
UNC119B_Kwon201107_XENLA_00058556	-0.313593	6.30668	9.47279	0.00208542	0.0311712
FOXN3_TC419940	-0.420984	3.94085	9.47134	0.00208707	0.0311739
CASC4_Taira201203_XENLA_tissue_00227329	-0.539167	2.86681	9.46382	0.00209565	0.0312706
TMEM68_Ismailoglu201203_XENLA_00065535	-0.660111	1.00257	9.46308	0.00209649	0.0312706
BC073718.1	-0.578145	1.42042	9.44977	0.00211176	0.0314764
CDK17_XeXenL6RMv10031754m	0.43277	3.11587	9.4478	0.00211402	0.0314863
ZNF219_XeXenL6RMv10047521m	-0.449108	3.92667	9.44661	0.00211539	0.0314863
RANGAP1_Park201106_XENLA_00129594	-0.405627	3.87969	9.43269	0.00213152	0.0316904
HBG1_Taira201203_XENLA_tissue_00094705	1.36969	-1.43123	9.4322	0.00213209	0.0316904
GATA3_Taira201203_XENLA_tissue_00212153	-0.567248	1.4659	9.42772	0.0021373	0.0317456
NM_001097654.1	-0.56499	1.91777	9.42201	0.00214397	0.0318224
EIF4G1_Kwon201107_XENLA_00021419	-0.288026	8.518	9.4132	0.00215429	0.0319533
SLC24A5_Ismailoglu201203_XENLA_00046160	1.14093	-0.694901	9.39268	0.00217853	0.0322515
NM_001093172.1	0.771427	0.274357	9.38974	0.00218204	0.0322515
PPP1R3B_Kwon201107_XENLA_00073610	-0.327203	5.99212	9.3887	0.00218327	0.0322515
GVINP1_Taira201203_XENLA_tissue_00175749	-1.0591	-0.576756	9.38861	0.00218338	0.0322515
ZNHIT3_Taira201203_XENLA_stage_00068979	-0.978558	-0.445541	9.38857	0.00218342	0.0322515
SEL1L_XeXenL6RMv10026028m	0.534879	3.52491	9.3885	0.0021835	0.0322515
CENPT_Taira201203_XENLA_stage_00078138	-0.400171	4.25358	9.38574	0.0021868	0.0322778
BC170183.1	-0.543189	2.51681	9.38383	0.00218908	0.032289
C9ORF86_Ismailoglu201203_XENLA_00048802	0.323254	6.17449	9.36818	0.00220784	0.0325431
LRRC4B_TC456040	-1.18945	-1.35063	9.35786	0.00222031	0.0326791
TESK2_Taira201203_XENLA_tissue_00028035	0.513203	2.23891	9.35665	0.00222178	0.0326791
JAGN1_Ismailoglu201203_XENLA_00019059	-0.345928	5.07507	9.35628	0.00222222	0.0326791
STK40_XeXenL6RMv10015764m	-0.408716	5.37893	9.35546	0.00222323	0.0326791
PRICKLE3_Taira201203_XENLA_tissue_00223608	-0.545744	2.3249	9.35387	0.00222515	0.0326848
BC082432.1	-0.384555	6.3919	9.34385	0.00223735	0.0328413
BC139850.1	-0.467525	3.06231	9.34061	0.00224131	0.0328767
GSK3A_TC425134	-0.350522	6.95538	9.33523	0.0022479	0.0329507
SMARCE1_mgEST_Xl4jul2012_1013253974	-0.328188	5.65901	9.33053	0.00225368	0.0329998
NM_001086855.1	-0.304549	8.53528	9.32883	0.00225576	0.0329998
BC073639.1	-0.46717	2.55587	9.32749	0.00225741	0.0329998
BC116461.1	-0.535386	4.04559	9.32744	0.00225747	0.0329998
KIAA1267_Ismailoglu201203_XENLA_00032817	-0.435426	3.81046	9.3175	0.00226976	0.0331566
ZNF862_Taira201203_XENLA_tissue_00269892	0.801995	0.184105	9.30857	0.00228085	0.0332957
HAUS8_Taira201203_XENLA_tissue_00283575	-0.447367	3.19918	9.30729	0.00228244	0.0332961
ZNF384_Kwon201107_XENLA_00136225	-0.342786	6.34291	9.30595	0.00228411	0.033297
NA_Audic201207_XENLA_00005085	0.780003	0.0670377	9.30472	0.00228564	0.033297
DHX16_TC451848	0.452377	2.74235	9.3011	0.00229017	0.0333401
TOPBP1_TC413724	-0.480244	2.07961	9.29831	0.00229365	0.0333679
AM419008.1	-0.482769	4.75643	9.29103	0.00230278	0.0334413
WTAP_Quigley201207_XENLA_00085183	-0.315484	6.05525	9.29062	0.00230331	0.0334413
CORO1A_Quigley201112_XENLA_00098287	-0.886456	-0.393004	9.2886	0.00230585	0.0334413
NA_Taira201203_XENLA_stage_00049253	-0.550691	2.19108	9.28848	0.00230599	0.0334413
SFSWAP_Taira201203_XENLA_stage_00118254	-0.390172	4.64951	9.28763	0.00230707	0.0334413
ZNF518A_TeperekTkacz201206_XENLA_00063777	-0.581812	1.36259	9.28677	0.00230814	0.0334413
NM_001095839.1	0.747521	1.48747	9.27821	0.00231895	0.033575
DQ096851.1	-0.471792	9.15418	9.27586	0.00232193	0.0335786
PTPRC_Taira201203_XENLA_tissue_00051034	1.05976	0.606703	9.27527	0.00232269	0.0335786
CDADC1_Taira201203_XENLA_stage_00112031	0.5691	1.81271	9.27373	0.00232464	0.0335786
NM_001087148.1	-0.584226	1.4508	9.27267	0.00232598	0.0335786
ZRANB1_Kwon201107_XENLA_00109607	0.404058	4.59745	9.27109	0.00232799	0.0335786
ALG2_Audic201207_XENLA_00001739	-0.472702	4.73858	9.27054	0.00232869	0.0335786
PDGFB_Quigley201207_XENLA_00001500	-0.519202	3.33385	9.2689	0.00233078	0.033586
HKDC1_Horb201201_XENLA_00044095	-0.428272	5.75473	9.26498	0.00233578	0.0336352
MCART1_Ismailoglu201203_XENLA_00022970	0.620047	0.868742	9.26245	0.002339	0.0336588
C2CD2_Taira201203_XENLA_stage_00130528	-0.348217	5.72036	9.2592	0.00234316	0.0336682
NM_001097901.1	-0.404881	5.36949	9.25816	0.00234449	0.0336682
FGF16_Taira201203_XENLA_tissue_00055335	-0.435395	4.40839	9.25708	0.00234587	0.0336682
C18ORF32_Taira201203_XENLA_tissue_00226079	-0.396181	4.238	9.25698	0.002346	0.0336682
GLIS2_TC452573	-0.558425	2.45387	9.25417	0.0023496	0.0336971
KLHL8_Audic201207_XENLA_00007564	-0.448845	3.18783	9.24046	0.00236726	0.0339275
NM_001092421.1	0.418955	3.42722	9.23192	0.00237832	0.0340631
CBY1_TeperekTkacz201206_XENLA_00084543	-0.82407	0.393347	9.22737	0.00238424	0.0341249
C9ORF86_Taira201203_XENLA_tissue_00059086	0.470069	3.99681	9.22145	0.00239196	0.0342122
FAM20B_Ismailoglu201203_XENLA_00005437	0.639893	1.856	9.21986	0.00239404	0.034219
AMMECR1L_Taira201203_XENLA_tissue_00208111	0.500245	2.43853	9.20697	0.00241095	0.0344222
NA_Audic201207_XENLA_00003837	0.399698	4.07707	9.20572	0.0024126	0.0344222
NM_001096391.1	-0.276568	8.66803	9.20508	0.00241345	0.0344222
BET1L_Taira201203_XENLA_stage_00050518	-0.420042	3.98276	9.2041	0.00241474	0.0344222
NA_Horb201201_XENLA_00033566	-0.600035	1.49025	9.19157	0.00243133	0.0346354
BC059340.1	0.515256	3.55806	9.17838	0.0024489	0.0348624
NA_Kwon201107_XENLA_00123601	-0.827148	0.444873	9.17033	0.00245971	0.0349928
NM_001091363.1	-0.692553	3.44844	9.15612	0.00247888	0.0352419
NA_TC433756	1.07045	-0.641354	9.15451	0.00248106	0.0352493
ARHGEF40_Taira201203_XENLA_stage_00200091	-0.874103	0.161288	9.15162	0.00248498	0.0352814
NM_001093412.1	-0.411011	3.36748	9.14604	0.00249257	0.0353655
GABARAPL2_TC430294	0.682596	0.627369	9.14384	0.00249557	0.0353845
AKAP13_Horb201201_XENLA_00182715	0.721229	0.261078	9.1401	0.00250067	0.0354332
NA_XeXenL6RMv10002712m	-0.685047	0.88969	9.13766	0.00250401	0.0354568
DDX27_Taira201203_XENLA_stage_00001583	-0.289222	7.95106	9.1329	0.00251053	0.0355255
BC169867.1	0.386575	5.1951	9.13093	0.00251324	0.0355401
NM_001094370.1	-0.441232	7.35055	9.12682	0.0025189	0.0355964
XB-GENE-5994092_XeXenL6RMv10035365m	-0.871448	-0.196973	9.12412	0.00252261	0.0356252
KDM4A_Kwon201107_XENLA_00087442	0.320493	5.65445	9.11735	0.00253196	0.0357335
TUBB_mgEST_Xl4jul2012_1013254044	-0.369265	7.34749	9.11318	0.00253775	0.0357913
BC077421.1	-0.433196	6.90961	9.11181	0.00253964	0.0357942
RBL1_Audic201207_XENLA_00007667	-0.358919	7.02976	9.11056	0.00254139	0.0357951
CCDC65_Taira201203_XENLA_tissue_00076266	-0.638775	1.31384	9.10649	0.00254704	0.0358301
NA_Quigley201112_XENLA_00111372	-0.889817	-0.489809	9.10532	0.00254867	0.0358301
TLE4_Taira201203_XENLA_tissue_00156874	0.407469	4.04021	9.10495	0.00254919	0.0358301
NP_001017052.1_TeperekTkacz201202_XENLA_00001990	-0.282067	9.43556	9.10392	0.00255062	0.0358301
USP37_Park201106_XENLA_00035322	-0.385958	4.41805	9.10186	0.0025535	0.035835
PARP1_Quigley201207_XENLA_00041886	-0.404523	7.99962	9.10099	0.00255471	0.035835
NA_Taira201203_XENLA_stage_00106273	-0.696693	0.675467	9.10005	0.00255603	0.035835
TTK_XeXenL6RMv10026933m	-0.398195	5.27681	9.09757	0.00255949	0.0358599
STRAP_Taira201203_XENLA_stage_00091288	-0.473789	3.03995	9.09029	0.0025697	0.0359791
C20ORF151_XeXenL6RMv10030628m	-0.742833	1.16459	9.08087	0.00258297	0.036121
JUN_TC418666	-0.536622	2.30198	9.08069	0.00258323	0.036121
T2_Ismailoglu201203_XENLA_00023316	-0.357021	7.67544	9.07886	0.00258581	0.0361333
GYLTL1B_Kwon201107_XENLA_00076271	-0.332364	6.00915	9.06295	0.00260841	0.0364142
ATP2C1_XeXenL6RMv10014148m	0.422975	3.68629	9.0623	0.00260934	0.0364142
HSF1_Quigley201207_XENLA_00008358	-0.373173	4.39522	9.05829	0.00261506	0.0364624
KAT2B_Taira201203_XENLA_stage_00158914	0.476267	2.65401	9.05748	0.00261623	0.0364624
NM_001114404.1	-0.382868	4.39257	9.05401	0.00262119	0.0365076
GREB1L_Taira201203_XENLA_stage_00191944	-0.495015	8.68484	9.04879	0.00262869	0.036581
PPARD_Park201106_XENLA_00009503	-0.648366	0.777131	9.04794	0.00262991	0.036581
BPGM_mgEST_Xl4jul2012_1013104806	-0.503898	4.87746	9.04258	0.00263764	0.0366645
IFRD1_Taira201203_XENLA_stage_00010666	-0.422999	5.43081	9.04037	0.00264082	0.0366723
NM_001096663.1	-0.343906	5.78698	9.0398	0.00264165	0.0366723
AF412332.1	0.510994	2.24959	9.03531	0.00264815	0.0367385
GPAM_XeXenL6RMv10038751m	-0.378503	4.71008	9.03326	0.00265112	0.0367557
BC073080.1	-0.410954	3.52393	9.02983	0.00265609	0.0368006
NM_001089846.1	-0.313702	8.49699	9.02208	0.00266737	0.036916
NCKIPSD_Kwon201107_XENLA_00108685	0.353254	4.87273	9.02173	0.00266789	0.036916
CNIH_Taira201203_XENLA_tissue_00050014	-0.373978	4.28857	9.01492	0.00267785	0.0370296
NM_001091139.1	-0.653866	0.957659	9.00232	0.00269638	0.0372616
NM_001095905.1	0.364612	5.62713	8.99778	0.00270308	0.0373299
NM_001094879.1	-0.338712	5.546	8.99493	0.00270729	0.0373638
PTK2B_Taira201203_XENLA_tissue_00006004	-0.481019	3.6456	8.99299	0.00271017	0.0373792
NM_001088704.1	0.335936	5.19906	8.99058	0.00271375	0.0374043
NA_Quigley201112_XENLA_00072706	0.76262	-0.0481239	8.98508	0.00272193	0.0374927
BC108553.1	-0.31358	6.39603	8.98241	0.00272591	0.0375232
GPN2_Ismailoglu201203_XENLA_00032183	0.451966	3.5569	8.97494	0.00273707	0.0376525
NM_001095580.1	-0.799094	1.2462	8.9645	0.00275276	0.0378438
NM_001092805.1	-0.292928	6.90045	8.96304	0.00275495	0.0378494
TBCD_Quigley201207_XENLA_00057839	0.494364	2.34689	8.95823	0.00276222	0.0379248
NM_001101777.1	-0.446657	2.97063	8.95313	0.00276995	0.0379922
PLCL2_TC438895	0.822959	-0.247215	8.95262	0.00277071	0.0379922
KLHL24_Kwon201107_XENLA_00111234	0.533505	2.25356	8.95039	0.0027741	0.0380142
NM_001093298.1	-0.870586	-0.0125774	8.94451	0.00278305	0.0381107
GALNT11_TC434553	-0.515979	4.21332	8.9434	0.00278474	0.0381107
EGLN2_XeXenL6RMv10033078m	0.991932	-0.268706	8.9391	0.0027913	0.0381759
NA_XeXenL6RMv10013183m	-0.428023	4.22947	8.93589	0.00279622	0.0382186
NM_001094713.1	-0.703352	0.494054	8.93135	0.00280318	0.0382853
DKKX_XeXenL6RMv10035542m	-0.573697	2.35366	8.93035	0.0028047	0.0382853
TRPV5_Taira201203_XENLA_stage_00005768	-0.578702	2.7167	8.92896	0.00280684	0.0382857
TAB3_XeXenL6RMv10028459m	-0.473275	3.28909	8.92798	0.00280834	0.0382857
TMEM116_Taira201203_XENLA_stage_00214836	-1.00242	3.21105	8.92591	0.00281153	0.0383046
SNCAIP_Taira201203_XENLA_tissue_00064030	0.956488	1.27229	8.9186	0.00282281	0.0383929
NM_001095023.1	-0.3571	5.25929	8.91776	0.00282411	0.0383929
GINS1_Taira201203_XENLA_stage_00194386	-0.606967	1.0143	8.91717	0.00282502	0.0383929
CAB39_XeXenL6RMv10037739m	0.81406	-0.203033	8.91703	0.00282524	0.0383929
PRPF4B_TC455954	-0.710215	0.520645	8.91065	0.00283513	0.0384931
SGMS1_TeperekTkacz201206_XENLA_00129715	-0.426563	3.846	8.90993	0.00283624	0.0384931
BC071053.1	-0.438814	5.33082	8.90679	0.00284112	0.0385347
NM_001096967.1	0.446324	2.96713	8.90238	0.00284799	0.0386032
NA_Taira201203_XENLA_stage_00122175	-0.569514	6.21906	8.89828	0.00285439	0.038644
DOC2A_Taira201203_XENLA_tissue_00082054	0.960692	-0.867051	8.89813	0.00285463	0.038644
AY211396.1	0.406094	3.79584	8.88735	0.00287153	0.038848
AURKB_XeXenL6RMv10038346m	-0.385489	4.20552	8.86797	0.00290217	0.0392375
USP8_Ismailoglu201203_XENLA_00020345	0.502172	3.00965	8.86639	0.00290469	0.0392465
NA_Quigley201112_XENLA_00052430	-0.398042	4.58603	8.86515	0.00290667	0.0392483
ANKAR_Taira201203_XENLA_tissue_00014833	-0.868707	-0.140026	8.8577	0.00291855	0.0393837
C12ORF23_Ismailoglu201203_XENLA_00058322	-0.360324	4.71006	8.85223	0.00292731	0.0394769
NUS1_Taira201203_XENLA_stage_00091247	0.475657	2.24978	8.84869	0.00293299	0.0395284
GNAQ_TeperekTkacz201206_XENLA_00051514	0.331768	5.36035	8.84382	0.00294082	0.0396088
NA_XeXenL6RMv10045515m	0.954751	-0.807882	8.83934	0.00294806	0.0396811
NM_001096111.1	-0.325527	5.72717	8.82759	0.00296709	0.039912
TSHZ1_Taira201203_XENLA_stage_00063193	0.927246	-0.475962	8.82525	0.00297091	0.0399344
VPRBP_Ismailoglu201203_XENLA_00037134	0.410613	3.867	8.82426	0.00297252	0.0399344
NM_001087979.1	-0.429162	5.96243	8.81627	0.00298556	0.0400476
NA_Taira201203_XENLA_tissue_00281514	0.805284	-0.256929	8.81601	0.00298599	0.0400476
SIDT2_Taira201203_XENLA_stage_00206651	-0.345538	5.25134	8.81564	0.0029866	0.0400476
ARHGEF40_Taira201203_XENLA_tissue_00144294	-0.534007	2.8929	8.8077	0.00299962	0.040184
AKAP11_Kwon201107_XENLA_00078440	0.583351	1.58512	8.80713	0.00300055	0.040184
CEBPB_Ismailoglu201203_XENLA_00073346	-0.885428	-0.22947	8.80398	0.00300574	0.0402127
PKP1_Taira201203_XENLA_tissue_00019803	-0.405973	4.37015	8.80353	0.00300648	0.0402127
JAK2_XeXenL6RMv10024929m	0.60449	1.45728	8.80175	0.00300941	0.0402151
NM_001086287.1	-0.296094	6.68219	8.80112	0.00301045	0.0402151
TBC1D12_Kwon201107_XENLA_00041790	0.385483	5.32738	8.79735	0.00301668	0.040273
SH2B3_Ismailoglu201203_XENLA_00052335	0.474657	2.35881	8.79595	0.003019	0.0402786
ADNP2_Taira201203_XENLA_tissue_00067257	-0.325367	5.83555	8.78799	0.00303219	0.0404293
ARL6IP6_Taira201203_XENLA_stage_00212115	-0.677766	0.634111	8.7854	0.00303651	0.0404615
TEAD1_TC432461	-0.425958	3.51478	8.78027	0.00304507	0.04055
RPA1_XeXenL6RMv10022604m	-0.555657	1.61341	8.77912	0.00304698	0.0405501
OXNAD1_Taira201203_XENLA_stage_00083321	0.475988	2.40696	8.76549	0.00306984	0.0408206
CDC42_TeperekTkacz201202_XENLA_00129439	-0.405701	4.96623	8.76471	0.00307115	0.0408206
LIN28A_Quigley201207_XENLA_00035231	-0.373837	9.24792	8.76096	0.00307747	0.040879
PCDH8_XeXenL6RMv10032431m	-0.911054	-0.0837299	8.75795	0.00308256	0.0409002
CNOT3_XeXenL6RMv10052761m	-0.30515	5.94165	8.75774	0.00308292	0.0409002
NM_001093618.1	-0.52288	2.20316	8.74506	0.00310441	0.0411597
PDIA3_XeXenL6RMv10001162m	0.287248	6.8116	8.74243	0.0031089	0.0411752
LRRC14_Taira201203_XENLA_stage_00086489	-0.492134	2.24953	8.7421	0.00310946	0.0411752
MAP9_XeXenL6RMv10054026m	-0.438306	2.94296	8.72961	0.00313084	0.0414324
MMP19_TeperekTkacz201202_XENLA_00087527	-0.465969	2.593	8.72563	0.00313767	0.041497
CD99L2_Taira201203_XENLA_tissue_00200688	-0.508155	3.52416	8.71996	0.00314744	0.0416003
NM_001093046.1	-0.345372	6.12789	8.71291	0.00315964	0.0417234
PPAT_Audic201207_XENLA_00003132	-0.300222	6.32727	8.71231	0.00316068	0.0417234
FAM212A_Taira201203_XENLA_stage_00143585	-0.746007	0.0153544	8.70895	0.00316652	0.0417744
ZC4H2_TC421620	-0.316537	5.82471	8.70633	0.00317108	0.0418086
DMRTA2_Taira201203_XENLA_stage_00041379	-0.615117	1.70203	8.70472	0.00317387	0.0418195
CEP95_Ismailoglu201203_XENLA_00060228	-0.306233	6.19724	8.6981	0.00318541	0.0419455
CAV2_Taira201203_XENLA_stage_00194938	-0.622829	2.73253	8.69463	0.0031915	0.0419996
DEPDC4_Taira201203_XENLA_stage_00056350	0.430016	4.01859	8.69214	0.00319585	0.0420309
UQCR11_Kwon201107_XENLA_00024298	-0.286935	7.51024	8.68948	0.00320052	0.0420551
KIF11_XeXenL6RMv10028561m	-0.368926	5.07742	8.68855	0.00320215	0.0420551
KCTD15_TC415709	-0.713565	0.435594	8.68771	0.00320363	0.0420551
INSM1_Ismailoglu201203_XENLA_00016955	-0.424459	3.52508	8.6837	0.00321069	0.0421027
NM_001094609.1	-0.345346	5.14842	8.6834	0.00321122	0.0421027
NM_001089611.1	-0.842021	-0.592531	8.67701	0.00322249	0.0422136
CPM_Taira201203_XENLA_tissue_00041079	-0.481244	4.45066	8.67635	0.00322365	0.0422136
NM_001092631.2	0.393065	3.77124	8.67325	0.00322915	0.0422594
SFRPX_Quigley201112_XENLA_00110009	-0.726648	1.40624	8.66521	0.00324342	0.0424201
FRMD6_Taira201203_XENLA_stage_00194266	0.464353	3.17439	8.66138	0.00325025	0.0424833
SPOPL_Kwon201107_XENLA_00112832	0.420131	3.0864	8.65667	0.00325867	0.0425671
BC099001.1	0.755343	-0.161725	8.65469	0.0032622	0.0425687
E1C2T7_CHICK_Ismailoglu201203_XENLA_00003699	0.388225	4.99393	8.65133	0.00326822	0.0425687
NA_Taira201203_XENLA_stage_00008211	-0.441733	5.58158	8.65103	0.00326876	0.0425687
RCBTB2_Taira201203_XENLA_tissue_00197723	0.39819	4.02813	8.65083	0.00326913	0.0425687
NA_Taira201203_XENLA_tissue_00056258	-0.58241	3.87391	8.65064	0.00326946	0.0425687
BC041195.1	-0.329654	7.85754	8.64725	0.00327556	0.0425687
RBM14_Taira201203_XENLA_stage_00152033	-0.385052	7.84315	8.6463	0.00327725	0.0425687
PROS1_Taira201203_XENLA_tissue_00168898	-0.609429	1.7108	8.64572	0.0032783	0.0425687
PSMB7_TeperekTkacz201206_XENLA_00047398	-0.320837	5.62178	8.64508	0.00327945	0.0425687
MTM1_Kwon201107_XENLA_00122390	0.343045	4.89859	8.64442	0.00328064	0.0425687
NM_001096074.1	-0.387672	4.34623	8.64432	0.00328083	0.0425687
NM_001093493.1	0.386346	4.55163	8.62792	0.00331049	0.0429113
DBF4B_Kwon201107_XENLA_00076573	-0.515794	2.99109	8.62749	0.00331128	0.0429113
MLL_Taira201203_XENLA_stage_00186681	-0.39161	5.25531	8.62531	0.00331523	0.0429243
MYC_TeperekTkacz201206_XENLA_00099058	-0.518109	3.77913	8.62471	0.00331632	0.0429243
UHRF1_Ismailoglu201203_XENLA_00052733	-0.592767	0.781702	8.62336	0.00331879	0.04293
IFFO2_Ismailoglu201203_XENLA_00006123	-0.470159	2.48321	8.61568	0.00333282	0.0430852
EIF4A1B_Taira201203_XENLA_tissue_00095892	-0.572022	1.78587	8.60203	0.00335788	0.0433828
NM_001090633.1	-0.487933	4.73369	8.60086	0.00336004	0.0433843
MIDN_XeXenL6RMv10004225m	-0.326773	8.85963	8.59414	0.00337246	0.0434903
TESK2_Taira201203_XENLA_stage_00118699	0.351474	4.66818	8.59298	0.00337461	0.0434903
AGAP2_XeXenL6RMv10024762m	-1.01243	1.95717	8.59201	0.00337641	0.0434903
LRP2_Ismailoglu201203_XENLA_00066879	-0.7435	0.869306	8.59199	0.00337644	0.0434903
DDX39B_TC461280	0.678582	0.187051	8.5901	0.00337996	0.0435093
MCL1_Kwon201107_XENLA_00109690	-0.285037	6.62267	8.58683	0.00338602	0.043561
MED13L_XeXenL6RMv10041766m	0.470519	3.92105	8.57049	0.00341656	0.043885
NM_001095854.1	0.643977	0.842203	8.57026	0.00341698	0.043885
NM_001093036.1	0.294332	6.45067	8.57003	0.00341741	0.043885
SPTAN1_XeXenL6RMv10053359m	-0.292317	6.87303	8.5574	0.00344121	0.0441639
NIPA2_Park201106_XENLA_00149140	-0.394899	4.13034	8.55402	0.00344761	0.0442193
NM_001097057.1	-0.408435	4.8373	8.54657	0.00346174	0.0443549
NM_001093377.1	-0.35928	4.83918	8.54536	0.00346405	0.0443549
FOXO4_Quigley201112_XENLA_00125825	-0.392042	4.08918	8.54515	0.00346445	0.0443549
CIB3_Taira201203_XENLA_tissue_00146656	-0.561865	2.006	8.53602	0.00348186	0.044551
NM_001092248.1	-0.652871	1.33863	8.52884	0.00349563	0.0446837
BC079821.1	0.380553	9.67839	8.52842	0.00349644	0.0446837
ZNF639_Taira201203_XENLA_stage_00218238	-0.298735	6.03007	8.52397	0.00350499	0.0447612
MMRN2_Taira201203_XENLA_tissue_00243195	-0.57674	3.54436	8.52209	0.00350861	0.0447612
EEA1_Taira201203_XENLA_tissue_00114486	0.439802	3.27478	8.52198	0.00350882	0.0447612
ITGB1BP1_Quigley201112_XENLA_00010905	-0.484443	1.91035	8.51847	0.00351559	0.0448206
CHMP1A_Ismailoglu201203_XENLA_00007994	0.462572	4.45122	8.50787	0.00353613	0.0450555
HELLS_XeXenL6RMv10013547m	-0.347348	5.17307	8.49866	0.00355409	0.0452571
MAMDC4_Taira201203_XENLA_tissue_00010637	0.467156	2.4047	8.49397	0.00356326	0.0453467
SOCS1_TC438610	-0.41677	3.62564	8.49066	0.00356973	0.0454019
BC133759.1	-0.407459	3.18688	8.48754	0.00357586	0.0454526
CCDC130_Ismailoglu201203_XENLA_00066710	0.430105	2.9113	8.48539	0.00358011	0.0454527
PRIM2_XeXenL6RMv10041733m	0.603087	0.930837	8.48536	0.00358015	0.0454527
COX4I1_TC425519	0.353567	4.63948	8.48081	0.00358912	0.0455394
DMPK_Taira201203_XENLA_tissue_00054977	0.535812	1.75014	8.4735	0.00360358	0.0456955
ZADH2_TC419213	0.421997	3.51156	8.46892	0.00361266	0.0457833
PUS3_XeXenL6RMv10024542m	-0.658001	0.227669	8.46694	0.00361659	0.0458058
LRRC68_Ismailoglu201203_XENLA_00014073	0.359616	4.54243	8.46555	0.00361937	0.0458137
CDC25C_Ismailoglu201203_XENLA_00044266	-0.444282	2.39072	8.46258	0.00362526	0.045861
CRABP2_Taira201203_XENLA_tissue_00241645	-0.653867	5.86777	8.45861	0.00363319	0.0459339
SLC2A13_Taira201203_XENLA_tissue_00055635	0.929853	-0.778493	8.45687	0.00363668	0.0459506
NM_001094806.1	0.43037	3.16426	8.45453	0.00364135	0.0459823
ALS2CL_Taira201203_XENLA_tissue_00012048	0.506353	2.67121	8.45249	0.00364544	0.0460066
APPL1_XeXenL6RMv10042406m	0.451828	2.35118	8.44824	0.00365397	0.0460607
C1ORF43_Ismailoglu201203_XENLA_00059882	-0.382199	3.92907	8.44819	0.00365406	0.0460607
ZNF644_Taira201203_XENLA_tissue_00069368	-0.5161	3.71123	8.44707	0.00365631	0.0460617
CBLN1_Quigley201207_XENLA_00101732	-0.559401	1.61542	8.44495	0.00366058	0.0460882
RPA1_TC415744	-0.345991	4.66698	8.44255	0.00366541	0.0461216
NM_001103190.1	0.39808	4.08888	8.43767	0.00367526	0.0461815
ERRFI1_Quigley201207_XENLA_00091060	-0.98214	-0.603803	8.43717	0.00367628	0.0461815
NM_001085721.1	-0.748145	2.20579	8.43492	0.00368082	0.0461815
HK1_XeXenL6RMv10008330m	0.6984	1.1521	8.43489	0.0036809	0.0461815
CBY1_Kwon201107_XENLA_00033993	-0.654897	1.06138	8.43482	0.00368104	0.0461815
CFI_Audic201207_XENLA_00002220	-0.839667	0.436894	8.42515	0.00370066	0.0464002
NA_Quigley201112_XENLA_00100591	-0.591823	2.81068	8.42357	0.00370388	0.0464132
NM_001127846.1	0.365815	4.45608	8.41988	0.00371141	0.0464802
NM_001085895.1	-0.296854	6.70051	8.41289	0.00372569	0.0466315
FOSL2_Kwon201107_XENLA_00078674	-0.44159	3.69661	8.40973	0.00373219	0.0466853
VSIG10_Taira201203_XENLA_stage_00084483	0.425676	2.84453	8.40848	0.00373475	0.0466899
MFN1_Taira201203_XENLA_tissue_00163852	0.625042	1.02981	8.40512	0.00374165	0.0467486
PDK3_Quigley201207_XENLA_00077575	0.60481	1.31641	8.4014	0.00374931	0.0468168
NM_001095131.1	-0.409397	3.20679	8.38327	0.00378691	0.0472585
WDR96_TeperekTkacz201202_XENLA_00047016	-0.642298	1.1183	8.37875	0.00379633	0.0473483
GPX1_Taira201203_XENLA_tissue_00030949	-0.758837	-0.463257	8.3642	0.00382686	0.0476807
ELOF1_TC446117	-0.285205	6.69561	8.36159	0.00383235	0.0476807
RSPRY1_XeXenL6RMv10000908m	0.774187	-0.0028825	8.36147	0.00383261	0.0476807
SEPP1_Kwon201107_XENLA_00015837	0.68693	0.853602	8.36095	0.00383371	0.0476807
ZMIZ1_TeperekTkacz201206_XENLA_00104741	-0.398939	5.29578	8.36071	0.00383421	0.0476807
EFNB1_Kwon201107_XENLA_00025453	-0.421521	6.45444	8.35655	0.00384299	0.047762
CARD11_Ismailoglu201203_XENLA_00063512	-0.860724	0.471435	8.35456	0.0038472	0.0477863
SELS_Taira201203_XENLA_tissue_00119105	-0.357508	4.87864	8.34853	0.00385999	0.0479118
GJC2_Park201106_XENLA_00148630	-0.912118	-0.671238	8.3471	0.00386304	0.0479118
E2F7_Ismailoglu201203_XENLA_00066797	-0.267723	8.1337	8.34661	0.00386408	0.0479118
XB-GENE-5815363_Ismailoglu201203_XENLA_00013803	-0.354696	6.67892	8.33164	0.00389604	0.04828
SLC27A2_Horb201201_XENLA_00160791	0.407397	3.23164	8.32623	0.00390767	0.0483959
KCNK5_Taira201203_XENLA_stage_00173307	-0.432737	5.87158	8.3186	0.00392411	0.0485711
NM_001093904.1	0.318036	5.32867	8.31641	0.00392886	0.0486016
DUSP1_XeXenL6RMv10033068m	-0.435485	3.49028	8.31445	0.0039331	0.0486258
NM_001085692.1	0.437184	4.42174	8.31155	0.00393937	0.048675
NM_001086720.1	-0.360697	5.69812	8.3084	0.00394621	0.0487311
RAB13_Kwon201107_XENLA_00062280	-0.398155	3.92083	8.30498	0.00395366	0.0487747
CDKN1A_Taira201203_XENLA_tissue_00143446	-0.614013	1.14014	8.30371	0.00395643	0.0487747
TXNDC17_Ismailoglu201203_XENLA_00020445	-0.390078	4.09602	8.30361	0.00395663	0.0487747
MRTO4_TeperekTkacz201206_XENLA_00073097	-0.301976	6.4213	8.30184	0.0039605	0.0487808
PDIA4_Park201106_XENLA_00071791	-0.32857	5.50295	8.30128	0.00396171	0.0487808
NA_TeperekTkacz201206_XENLA_00132071	-1.75841	-0.725696	8.29917	0.00396633	0.0488093
SLU7_Quigley201207_XENLA_00011766	-0.295981	6.62204	8.29303	0.00397975	0.0489221
EGFLAM_Kwon201107_XENLA_00111824	-0.5364	4.53134	8.29287	0.00398011	0.0489221
NM_001098684.1	-0.441359	3.15403	8.28886	0.00398891	0.049002
NA_Audic201207_XENLA_00004314	-0.432667	3.58818	8.28381	0.00400001	0.04911
NM_001096248.1	-0.455558	7.43705	8.26498	0.0040417	0.0495932
NM_001094516.1	-0.449356	3.05069	8.26284	0.00404648	0.0496232
EYA1_Park201106_XENLA_00140098	-0.636772	4.17816	8.25713	0.00405922	0.0497506
CYP27C1_XeXenL6RMv10007439m	-0.502975	2.21932	8.25168	0.00407143	0.049855
NA_Quigley201207_XENLA_00070182	-0.503425	3.25205	8.25123	0.00407243	0.049855
NA_Taira201203_XENLA_tissue_00035115	0.661078	1.14277	8.24711	0.0040817	0.0499397

## Sheet: Kdm5b-sperm
gene_id	logFC	logCPM	LR	PValue	FDR
HARS_Park201106_XENLA_00177823	-2.95186	6.31346	448.599	1.45575e-99	3.03698e-95
NM_001086345.1	-2.45434	8.42067	374.71	1.76472e-83	1.84078e-79
NM_001087446.1	-3.2268	4.48377	298.371	7.45722e-67	5.18575e-63
PLAUR_Taira201203_XENLA_tissue_00281787	-2.66878	5.47724	289.574	6.15717e-65	3.21127e-61
NA_XeXenL6RMv10004171m	-2.40156	5.82081	282.746	1.89291e-63	7.89796e-60
CTPS_Ismailoglu201203_XENLA_00039586	-1.85869	8.62467	281.926	2.8562e-63	9.93102e-60
CCNG1_XeXenL6RMv10009072m	-1.47899	10.0324	277.973	2.07677e-62	6.18936e-59
COL17A1_Quigley201207_XENLA_00041639	-3.32397	5.69214	267.931	3.2054e-60	8.35888e-57
NA_Taira201203_XENLA_tissue_00047970	-3.21109	4.56451	262.227	5.61246e-59	1.30097e-55
S1PR5_TeperekTkacz201206_XENLA_00068936	3.11741	6.12137	260.854	1.11768e-58	2.3317e-55
BC048022.1	-2.39841	5.19611	250.495	2.02573e-56	3.84189e-53
COL17A1_TeperekTkacz201202_XENLA_00120867	-3.34888	5.25775	243.517	6.72665e-55	1.16943e-51
RBL2_Taira201203_XENLA_tissue_00253571	-1.82372	6.5094	240.321	3.34785e-54	5.37252e-51
E230028L10RIK_Ismailoglu201203_XENLA_00035721	-1.75307	7.20934	235.411	3.9385e-53	5.86893e-50
S1PR5_Taira201203_XENLA_stage_00019774	3.8846	4.25996	230.982	3.6414e-52	5.06446e-49
MARS2_Horb201201_XENLA_00089909	-1.41401	9.11915	218.281	2.14442e-49	2.79605e-46
BC094137.1	-1.69291	6.64326	217.658	2.93197e-49	3.59805e-46
EMR2_Taira201203_XENLA_stage_00008255	-2.39721	5.46309	208.368	3.11892e-47	3.61483e-44
XB-GENE-5815363_Ismailoglu201203_XENLA_00013803	-1.7274	7.69251	201.268	1.10424e-45	1.21245e-42
NA_XeXenL6RMv10026796m	-2.60039	4.6069	200.64	1.51383e-45	1.57908e-42
MAP1LC3A_Amin201106_XENLA_00042927	-1.70918	5.99865	198.849	3.72408e-45	3.69961e-42
NM_001089073.1	-1.65078	8.22973	188.536	6.63611e-43	6.29284e-40
PTPN14_Kwon201107_XENLA_00101059	-1.59827	6.43829	187.337	1.21225e-42	1.09957e-39
NM_001094747.1	-1.62202	7.66323	181.146	2.72444e-41	2.36822e-38
NA_Taira201203_XENLA_tissue_00110760	-3.25002	3.3019	178.796	8.8794e-41	7.40968e-38
RNF24_Taira201203_XENLA_tissue_00178150	-1.79837	6.38331	170.91	4.68093e-39	3.75591e-36
NA_Kwon201107_XENLA_00002594	-2.75341	4.5062	170.794	4.96291e-39	3.83467e-36
SESN1_Ismailoglu201203_XENLA_00023550	-1.5643	6.79349	169.942	7.61934e-39	5.67695e-36
MYO9B_Taira201203_XENLA_tissue_00071809	-1.67689	6.31777	169.48	9.60978e-39	6.91308e-36
MMP14_Amin201106_XENLA_00082467	-1.9871	7.80191	168.34	1.70481e-38	1.18552e-35
TANC1_Taira201203_XENLA_stage_00090120	-2.03747	4.9947	164.395	1.24005e-37	8.34517e-35
JN713926.1	-1.58022	5.9574	162.107	3.9209e-37	2.55618e-34
HEPACAM_Taira201203_XENLA_tissue_00174038	-3.04719	2.84438	157.84	3.35409e-36	2.12039e-33
NA_Quigley201207_XENLA_00019564	-2.27711	4.22026	154.545	1.76069e-35	1.08034e-32
MAP4K4_Audic201207_XENLA_00005421	-1.41645	6.273	153.189	3.48301e-35	2.07607e-32
EDA2R_Kwon201107_XENLA_00038902	-1.4629	7.14934	152.941	3.94657e-35	2.28703e-32
TANC1_Taira201203_XENLA_stage_00177563	-1.93202	4.90696	140.148	2.47095e-32	1.39321e-29
MCC_Audic201207_XENLA_00002896	-2.06528	4.19993	139.78	2.97367e-32	1.63254e-29
NA_Taira201203_XENLA_tissue_00071943	-1.32863	6.53351	139.33	3.72973e-32	1.99512e-29
MCC_Ismailoglu201203_XENLA_00013443	-2.68654	3.29714	138.395	5.97453e-32	3.11602e-29
H2AY_CHICK_Taira201203_XENLA_tissue_00087552	-3.16148	3.38028	137.561	9.09167e-32	4.62611e-29
RAB40B_TC422091	-1.34492	6.63772	135.893	2.10597e-31	1.04607e-28
DIRAS3_Taira201203_XENLA_tissue_00235335	-2.35682	3.77827	135.638	2.39397e-31	1.16146e-28
NA_TC419739	-3.15907	4.97356	133.495	7.04629e-31	3.3409e-28
HQ236552.1	-2.60529	2.90357	133.438	7.2497e-31	3.36096e-28
PRDM14_Ismailoglu201203_XENLA_00001210	2.19886	4.45027	132.727	1.03753e-30	4.70541e-28
BC100184.1	1.51796	6.09831	131.813	1.64404e-30	7.29742e-28
NM_001097728.1	-1.71038	5.16598	129.583	5.05539e-30	2.1972e-27
NA_Quigley201112_XENLA_00131306	-2.69903	3.71477	127.993	1.12663e-29	4.79669e-27
CYP26C1_Taira201203_XENLA_stage_00087131	3.55327	2.01151	125.725	3.53228e-29	1.47381e-26
CPM_Taira201203_XENLA_tissue_00041079	-1.68989	5.20218	123.63	1.01499e-28	4.15192e-26
CKAP2_Taira201203_XENLA_stage_00070693	-1.46857	7.53984	123.158	1.28782e-28	5.16662e-26
PIK3R5_TC414333	-3.02645	3.12891	122.914	1.45617e-28	5.73181e-26
OLFM4_Quigley201112_XENLA_00066091	3.2734	2.91042	122.395	1.89131e-28	7.30678e-26
AIRE_TC467775	-3.02094	2.10805	122.056	2.24411e-28	8.51212e-26
PRDM14_TeperekTkacz201206_XENLA_00130032	1.78171	4.63796	121.771	2.59083e-28	9.65178e-26
HESX1_TC423712	2.93602	2.23029	121.306	3.2748e-28	1.19858e-25
PARP3_Ismailoglu201203_XENLA_00072813	-1.52263	5.96616	119.131	9.80139e-28	3.52546e-25
GJC2_Taira201203_XENLA_tissue_00059974	-2.34033	4.45205	117.936	1.79097e-27	6.33277e-25
FOXI4.1_Audic201207_XENLA_00002210	2.58762	2.78555	115.54	5.9942e-27	2.08418e-24
PDE4DIP_Ismailoglu201203_XENLA_00036763	-2.5751	2.90443	115.162	7.25237e-27	2.48031e-24
PTPRT_Taira201203_XENLA_tissue_00120268	-2.26795	3.21261	114.148	1.20944e-26	4.06957e-24
NT5M_Park201106_XENLA_00098058	-2.29499	3.02413	113.995	1.3061e-26	4.32507e-24
ULK1_Kwon201107_XENLA_00010325	-1.53248	5.29487	112.753	2.44366e-26	7.96557e-24
DSCAML1_TeperekTkacz201202_XENLA_00112016	-1.5384	7.59314	110.808	6.52e-26	2.09262e-23
NP_001096447.1_Taira201203_XENLA_tissue_00163778	-1.89439	4.09006	109.612	1.19186e-25	3.76736e-23
SESN1_Taira201203_XENLA_tissue_00285480	-1.64804	5.33003	108.132	2.51429e-25	7.82884e-23
BC074153.1	-1.30244	6.58857	108.024	2.65529e-25	8.14627e-23
HSH2D_Taira201203_XENLA_stage_00102768	-1.98326	4.18119	107.274	3.87736e-25	1.17231e-22
NA_Taira201203_XENLA_stage_00092538	-1.86152	3.78142	106.863	4.7695e-25	1.42145e-22
PAPPA2_XeXenL6RMv10034808m	-5.1539	1.95031	105.481	9.58296e-25	2.81577e-22
MDM2_Ismailoglu201203_XENLA_00061590	-1.17422	7.77781	105.064	1.18248e-24	3.42623e-22
NA_XeXenL6RMv10002712m	-2.77805	1.953	104.271	1.76445e-24	5.04246e-22
NA_TeperekTkacz201206_XENLA_00006101	-2.86461	2.14388	103.285	2.90263e-24	8.18305e-22
TMPRSS4_Taira201203_XENLA_tissue_00276064	-1.17692	7.81745	101.168	8.44914e-24	2.35021e-21
XB-GENE-987370_Ismailoglu201203_XENLA_00030421	-1.75686	4.826	101.135	8.59139e-24	2.35834e-21
BC091724.1	-1.65913	5.18074	100.411	1.23854e-23	3.35565e-21
AMOTL1_Taira201203_XENLA_tissue_00151547	-2.00961	3.96297	100.274	1.32689e-23	3.54893e-21
TCF24_Taira201203_XENLA_stage_00095200	-2.93544	3.10726	100.161	1.40513e-23	3.7106e-21
DNAJB1_Park201106_XENLA_00101765	-1.76732	3.82557	100.124	1.43178e-23	3.73372e-21
PDLIM5_Taira201203_XENLA_tissue_00158556	-1.61892	5.40084	100.053	1.48347e-23	3.82077e-21
BC045272.1	-1.23922	7.1575	98.7532	2.86021e-23	7.27679e-21
NA_XeXenL6RMv10040162m	-2.48459	2.33905	98.4444	3.34281e-23	8.40214e-21
NM_001086084.1	-1.41884	6.76549	97.8931	4.416e-23	1.09675e-20
ULK1_TeperekTkacz201206_XENLA_00063451	-1.28681	6.40344	97.6635	4.95883e-23	1.21707e-20
ST6GALNAC2_Horb201201_XENLA_00171717	-1.33331	5.44759	97.4505	5.52192e-23	1.33951e-20
NM_001090071.1	-1.87108	5.96642	97.0013	6.92829e-23	1.66136e-20
SFRPX_Quigley201112_XENLA_00110009	-2.63443	3.01433	95.8523	1.23785e-22	2.93454e-20
PIDD_Quigley201207_XENLA_00024420	-1.33216	6.12501	95.6181	1.39327e-22	3.2659e-20
AB602929.1	-2.68591	3.02475	95.4158	1.54314e-22	3.57701e-20
FAM69A_Ismailoglu201203_XENLA_00034185	-1.5541	4.94259	94.952	1.9506e-22	4.47181e-20
NDUFA8_Ismailoglu201203_XENLA_00021702	-1.52997	5.2889	94.7408	2.17015e-22	4.8493e-20
BC080062.1	-2.23463	3.00227	94.7303	2.18177e-22	4.8493e-20
RNF168_Taira201203_XENLA_stage_00124702	-1.0728	7.25765	94.7273	2.185e-22	4.8493e-20
RNF169_XeXenL6RMv10050260m	-1.35858	5.00053	92.827	5.70712e-22	1.25328e-19
MARCH8_Taira201203_XENLA_stage_00144257	-1.14657	6.08412	91.8286	9.45201e-22	2.05404e-19
NM_001094563.1	-2.05896	6.05556	91.4394	1.1506e-21	2.47461e-19
BC093488.1	-1.23419	5.65622	90.2346	2.11528e-21	4.50295e-19
NM_001086595.1	-1.41471	8.86743	90.109	2.25389e-21	4.74956e-19
NA_XeXenL6RMv10038731m	-1.37006	5.28518	89.98	2.4058e-21	5.01899e-19
HIP1_Taira201203_XENLA_stage_00009136	-2.03675	2.92504	89.7232	2.73923e-21	5.658e-19
SPTBN2_Kwon201107_XENLA_00029931	-1.09453	9.1544	88.9691	4.01023e-21	8.20211e-19
ZNF534_XeXenL6RMv10041665m	-3.141	1.68444	88.7886	4.39342e-21	8.89859e-19
PIK3R3_Taira201203_XENLA_stage_00143968	-1.30058	5.25574	87.6017	8.00539e-21	1.60585e-18
BC077452.1	-1.01791	7.54649	87.5342	8.28353e-21	1.64582e-18
LNX1_Quigley201207_XENLA_00097894	-1.55601	4.08621	87.4168	8.79008e-21	1.72999e-18
TFAP2A_Ismailoglu201203_XENLA_00044494	0.984339	7.60901	86.397	1.47207e-20	2.85481e-18
ENC1.2_XeXenL6RMv10044893m	-1.53266	4.84298	86.3892	1.4779e-20	2.85481e-18
NA_Taira201203_XENLA_tissue_00275540	-6.13476	0.619724	86.0776	1.73014e-20	3.31139e-18
NM_001096615.1	-1.9502	3.95682	85.7892	2.00177e-20	3.79645e-18
ULK1_Ismailoglu201203_XENLA_00016756	-1.26809	6.40656	85.7444	2.04766e-20	3.8485e-18
DENND1C_XeXenL6RMv10020430m	-2.67378	1.98462	84.3428	4.16012e-20	7.74896e-18
BC079803.1	-2.0888	2.78599	84.0715	4.77205e-20	8.81014e-18
PLK2_Taira201203_XENLA_tissue_00181055	-1.20735	8.00504	83.5498	6.21305e-20	1.13699e-17
PRR5L_Park201106_XENLA_00160942	-1.21745	5.97067	82.8706	8.76039e-20	1.58921e-17
NM_001091032.1	-0.904546	9.42231	81.7633	1.53402e-19	2.75885e-17
BC046267.1	-1.13708	7.54089	81.2648	1.97413e-19	3.52002e-17
LRRN4_Taira201203_XENLA_tissue_00286865	-2.08763	3.8732	80.8661	2.4154e-19	4.24821e-17
CYP27C1_Ismailoglu201203_XENLA_00045032	-1.08248	7.9111	80.8597	2.42325e-19	4.24821e-17
AMOTL1_XeXenL6RMv10041546m	-1.85197	4.10965	80.4645	2.95973e-19	5.14549e-17
NCOR2_XeXenL6RMv10014872m	-1.62914	3.97234	79.195	5.62727e-19	9.70215e-17
CAV2_Taira201203_XENLA_stage_00194938	-1.95119	3.66879	78.6827	7.29331e-19	1.24716e-16
NA_TeperekTkacz201206_XENLA_00129288	-2.27856	1.96751	78.5139	7.94378e-19	1.34734e-16
NM_001092436.1	-1.21447	6.07062	78.3405	8.6725e-19	1.45908e-16
ARHGEF19_Quigley201207_XENLA_00022263	-1.47357	5.70392	77.8572	1.10766e-18	1.84864e-16
B0BMG0_XENTR_Taira201203_XENLA_tissue_00042092	-1.56443	4.35754	77.7489	1.17006e-18	1.93729e-16
PDE4DIP_Taira201203_XENLA_tissue_00221191	-3.47263	0.808559	77.5455	1.297e-18	2.13056e-16
LAMB1_Taira201203_XENLA_stage_00035701	1.3797	5.6935	75.8044	3.13198e-18	5.10463e-16
C4ORF48_Taira201203_XENLA_tissue_00105511	-3.77257	1.88406	75.5844	3.50111e-18	5.66202e-16
SLC26A9_TeperekTkacz201206_XENLA_00000080	-2.05953	6.6366	75.1627	4.3349e-18	6.95652e-16
MYO9B_Park201106_XENLA_00130013	-1.47682	4.04443	74.5123	6.02616e-18	9.59677e-16
NT5M_Quigley201207_XENLA_00091072	-1.83156	3.02933	74.0696	7.54102e-18	1.18121e-15
NM_001093083.1	-1.52208	4.18197	74.064	7.56233e-18	1.18121e-15
NEUROG2_Kwon201107_XENLA_00138159	1.71561	3.72011	74.0576	7.58708e-18	1.18121e-15
NM_001094637.1	-1.19714	5.8649	73.9453	8.031e-18	1.24106e-15
CIB3_Taira201203_XENLA_tissue_00146656	-2.0553	3.24952	73.7035	9.07787e-18	1.39252e-15
BPIFC_XeXenL6RMv10004080m	-2.46789	1.92841	73.5637	9.74427e-18	1.48383e-15
PRICKLE1_TeperekTkacz201206_XENLA_00045289	-0.806934	8.83683	72.8072	1.42952e-17	2.16106e-15
NM_001094694.1	1.31205	5.64466	72.2752	1.8718e-17	2.80932e-15
FAM83A_Taira201203_XENLA_stage_00199554	-1.56344	4.67375	71.9134	2.24851e-17	3.3506e-15
CHST2_XeXenL6RMv10045321m	-1.76282	3.53524	71.8307	2.34481e-17	3.46933e-15
FGFR2_Quigley201207_XENLA_00116666	-0.898659	8.00201	71.4954	2.77911e-17	4.08295e-15
NM_001086497.1	-2.04649	2.71623	71.0809	3.42876e-17	5.00215e-15
PRX_Taira201203_XENLA_tissue_00284571	-2.54328	1.49621	70.7437	4.06774e-17	5.89314e-15
TMCC1_Ismailoglu201203_XENLA_00064494	-0.95938	7.08562	70.4991	4.60483e-17	6.62524e-15
AY218797.1	-0.910074	7.52909	70.408	4.8223e-17	6.8906e-15
MPP5_Ismailoglu201203_XENLA_00048860	-1.40462	5.05264	70.2168	5.31312e-17	7.54029e-15
NA_Taira201203_XENLA_stage_00095941	-1.6583	4.11175	69.9261	6.15697e-17	8.67883e-15
RIOK3_TeperekTkacz201206_XENLA_00122507	-0.877199	8.28488	69.4803	7.71834e-17	1.08067e-14
NM_001086948.1	0.974055	6.16834	69.4292	7.92057e-17	1.10159e-14
NM_001094464.1	-1.67642	4.23919	69.2375	8.72907e-17	1.206e-14
CDC6_TC417298	1.52162	6.24315	69.0146	9.77388e-17	1.34146e-14
TRAF4_Taira201203_XENLA_tissue_00033689	-1.02921	7.88621	68.9256	1.02251e-16	1.39422e-14
NA_Taira201203_XENLA_stage_00197069	-0.848259	8.05241	68.7164	1.13693e-16	1.54017e-14
C22ORF28_Ismailoglu201203_XENLA_00066335	-1.02729	6.04569	68.1839	1.48934e-16	2.00456e-14
TK2_TC423268	-0.943386	6.41649	68.0641	1.58264e-16	2.11647e-14
FAT1_Taira201203_XENLA_tissue_00017935	-1.00557	7.36215	67.9622	1.66662e-16	2.21459e-14
WNT11B_Kwon201107_XENLA_00085116	-0.845696	9.02318	67.7378	1.86749e-16	2.4658e-14
GM2A_Taira201203_XENLA_tissue_00009361	-2.72544	1.81409	67.4186	2.19567e-16	2.88088e-14
OLIG3_Taira201203_XENLA_stage_00040164	2.08379	2.15685	67.3316	2.29472e-16	2.99203e-14
TP73_Taira201203_XENLA_stage_00154389	-2.02878	2.32739	67.285	2.34961e-16	3.04457e-14
CCDC134_Ismailoglu201203_XENLA_00050608	-1.48078	4.37356	67.1896	2.46611e-16	3.17581e-14
IRX2_Taira201203_XENLA_tissue_00092633	1.1115	5.30353	67.0686	2.62218e-16	3.35606e-14
NA_TeperekTkacz201206_XENLA_00067407	-1.15441	5.82441	66.7693	3.05208e-16	3.88247e-14
NM_001086969.1	-1.87687	7.11794	66.7373	3.10216e-16	3.92225e-14
BC073066.1	-0.808485	8.10224	66.7	3.16141e-16	3.9731e-14
KCNN1_Ismailoglu201203_XENLA_00007109	-2.16037	2.37349	66.5128	3.47633e-16	4.34271e-14
CASC4_Taira201203_XENLA_stage_00194363	-1.09952	5.20281	66.1319	4.21739e-16	5.2371e-14
FJX1_Taira201203_XENLA_tissue_00021756	-1.36209	4.07097	66.0575	4.37968e-16	5.40644e-14
TP73_Quigley201207_XENLA_00055249	-1.96845	2.28723	65.9063	4.72886e-16	5.80314e-14
VEGT_Kwon201107_XENLA_00061961	-0.633111	10.2111	65.2772	6.50697e-16	7.9385e-14
E1BYU7_CHICK_Taira201203_XENLA_tissue_00112627	-1.30225	4.48113	64.9871	7.53914e-16	9.14427e-14
ENC1.2_Taira201203_XENLA_stage_00052113	-1.19629	5.58962	64.9593	7.64626e-16	9.22059e-14
HIP1_Kwon201107_XENLA_00033909	-1.57931	3.55856	64.9299	7.76087e-16	9.30502e-14
MARCH8_Ismailoglu201203_XENLA_00024521	-0.905131	6.69172	64.8565	8.05567e-16	9.60328e-14
PCDH19_Taira201203_XENLA_tissue_00230375	-1.03509	6.08148	64.8276	8.17452e-16	9.68959e-14
FJX1_Taira201203_XENLA_stage_00032513	-1.96153	2.43023	64.4561	9.87098e-16	1.16344e-13
NM_001085828.1	-4.3487	0.417727	64.2161	1.11494e-15	1.30674e-13
CYP27B1_XeXenL6RMv10004453m	-2.13984	2.12422	64.203	1.12238e-15	1.3081e-13
C7ORF46_TC450347	-1.36263	4.9117	64.1702	1.14123e-15	1.32268e-13
CNTRL_Park201106_XENLA_00169531	-1.33143	7.61022	63.8973	1.31078e-15	1.5108e-13
NM_001092642.1	-1.42507	4.88089	63.8582	1.33704e-15	1.5326e-13
BC157495.1	-0.8568	8.28836	63.3038	1.77166e-15	2.01969e-13
ANGPT4_Taira201203_XENLA_stage_00132334	-1.5064	5.07668	62.9849	2.08297e-15	2.35968e-13
IRF9_Ismailoglu201203_XENLA_00023974	-1.21927	4.73981	62.9759	2.09252e-15	2.35968e-13
CKAP2_Ismailoglu201203_XENLA_00049577	-0.759005	9.34795	62.9153	2.15791e-15	2.42033e-13
NEDD9_Quigley201207_XENLA_00047216	1.64755	3.80612	62.2249	3.06395e-15	3.41818e-13
TFAP2A_TeperekTkacz201206_XENLA_00051095	0.790474	8.49866	61.9797	3.47019e-15	3.8508e-13
NA_Taira201203_XENLA_stage_00135127	-0.967152	5.79954	61.9588	3.50718e-15	3.87126e-13
NM_001094642.1	-1.51777	3.70625	61.9307	3.55759e-15	3.90623e-13
BC084133.1	-1.53801	3.82193	61.9023	3.60928e-15	3.94224e-13
MECOM_Taira201203_XENLA_tissue_00062186	-2.52341	1.89166	61.6605	4.08081e-15	4.43406e-13
LANCL3_Ismailoglu201203_XENLA_00009144	-1.80594	2.9262	61.4575	4.52405e-15	4.89019e-13
ACAP3_Kwon201107_XENLA_00059556	-1.24009	5.52662	61.4011	4.65546e-15	5.0063e-13
NM_001096959.1	-1.38689	6.29952	61.2535	5.01795e-15	5.36843e-13
NIF_Taira201203_XENLA_stage_00073688	-1.31387	4.17521	61.2317	5.07371e-15	5.40039e-13
CACNA1G_XeXenL6RMv10039773m	-2.3198	2.18154	61.0903	5.45159e-15	5.77315e-13
BC159340.1	-1.70466	3.68075	61.055	5.55031e-15	5.84801e-13
F6UML9_XENTR_Taira201203_XENLA_tissue_00247935	-2.49684	3.4509	60.9177	5.95128e-15	6.23897e-13
SESN1_TC419834	-1.69959	2.93653	60.5162	7.29765e-15	7.61218e-13
FERMT1_Amin201106_XENLA_00058758	-1.83683	3.27342	60.4484	7.55337e-15	7.83972e-13
PDLIM5_Taira201203_XENLA_tissue_00182959	-1.66618	3.75463	60.1107	8.96712e-15	9.261e-13
AF387815.1	-0.915273	7.21758	60.0912	9.05644e-15	9.30716e-13
NA_Taira201203_XENLA_stage_00123858	-2.50736	1.34068	60.0468	9.26279e-15	9.47256e-13
TUBB2C_TC420595	-0.897892	7.13948	59.9532	9.71403e-15	9.88556e-13
ARID1B_Taira201203_XENLA_tissue_00207606	-1.83849	2.83156	59.7911	1.05479e-14	1.06821e-12
ARHGAP39_Taira201203_XENLA_tissue_00120894	-1.01029	6.81648	59.7766	1.06259e-14	1.0709e-12
CCDC37_Quigley201207_XENLA_00006512	-1.6541	4.09164	59.7219	1.09252e-14	1.09578e-12
MAPK12_Taira201203_XENLA_stage_00216797	-1.02556	5.30585	59.5932	1.1664e-14	1.16428e-12
BC045251.1	-1.39188	5.65097	59.4729	1.23991e-14	1.23176e-12
MAP4K4_Audic201207_XENLA_00005911	-1.40678	3.5833	59.3666	1.30871e-14	1.29395e-12
GTPBP2_Taira201203_XENLA_tissue_00155250	-1.05924	5.17793	59.2977	1.35537e-14	1.33376e-12
BC072776.1	-0.983807	6.0757	58.9042	1.65535e-14	1.62131e-12
ZFHX2_Taira201203_XENLA_tissue_00040234	-1.32588	4.24889	58.8628	1.69057e-14	1.64807e-12
CDC25C_Ismailoglu201203_XENLA_00006370	-0.840343	7.66132	58.7053	1.83143e-14	1.77708e-12
GOPC_Audic201207_XENLA_00005577	-1.22879	4.37534	57.9058	2.74972e-14	2.65577e-12
MARCH7_TC415150	-1.33112	4.85764	57.483	3.40919e-14	3.27754e-12
PKIB_Kwon201107_XENLA_00111710	-1.6075	3.35514	57.4167	3.52604e-14	3.37432e-12
BC077870.1	-1.81996	3.66864	57.2887	3.7632e-14	3.58484e-12
LIG4_Taira201203_XENLA_stage_00191726	-1.35544	3.78189	57.1488	4.04048e-14	3.83148e-12
NM_001091771.1	-1.37147	3.74944	56.9651	4.43616e-14	4.18765e-12
PVRL1_Ismailoglu201203_XENLA_00049060	-1.0143	5.38046	56.9197	4.53965e-14	4.26604e-12
PTAFR_Taira201203_XENLA_stage_00163362	-1.32591	6.89557	56.8971	4.59215e-14	4.29603e-12
PLEKHG5_XeXenL6RMv10001236m	-1.16761	4.98093	56.65	5.20698e-14	4.84947e-12
MTUS1_Ismailoglu201203_XENLA_00007463	-1.33855	4.58598	56.5133	5.5819e-14	5.17553e-12
MCAM_Taira201203_XENLA_tissue_00222537	-3.08708	1.35965	56.2856	6.26725e-14	5.78528e-12
MIXER_TeperekTkacz201206_XENLA_00068172	-0.851586	7.97964	56.1929	6.56986e-14	6.03791e-12
FAM214A_Taira201203_XENLA_tissue_00283994	-1.95574	3.03955	56.1665	6.65873e-14	6.09274e-12
WDFY4_Ismailoglu201203_XENLA_00019649	-1.48105	4.56687	55.9497	7.43504e-14	6.77335e-12
DPP3_Ismailoglu201203_XENLA_00040496	-0.83775	7.43601	55.8171	7.95357e-14	7.18311e-12
PLS3_TC414929	-0.8135	8.00238	55.8171	7.95369e-14	7.18311e-12
TINF2_Ismailoglu201203_XENLA_00009752	-0.82926	6.52502	55.3931	9.86809e-14	8.87363e-12
KCNQ4_Taira201203_XENLA_tissue_00053820	-1.82095	2.20279	55.0816	1.15629e-13	1.0353e-11
FOXO3_Kwon201107_XENLA_00002203	-0.895961	5.87361	55.0339	1.18467e-13	1.05618e-11
FGFR2_TeperekTkacz201206_XENLA_00119229	-1.19663	5.01961	54.9801	1.21755e-13	1.08087e-11
STIM2_TeperekTkacz201206_XENLA_00105093	-0.987777	5.57483	54.682	1.41702e-13	1.25262e-11
NM_001094287.1	-2.39621	1.2411	54.4944	1.55891e-13	1.37224e-11
NA_Taira201203_XENLA_tissue_00198850	-1.34978	4.18243	54.4277	1.61276e-13	1.41367e-11
NA_Taira201203_XENLA_tissue_00101032	-3.10841	0.378094	54.1986	1.81213e-13	1.58178e-11
NM_001086035.1	-1.33238	3.69611	54.1732	1.83573e-13	1.59571e-11
PIK3R3_Kwon201107_XENLA_00017045	-0.996493	5.18599	53.9892	2.01596e-13	1.7451e-11
MXD1_Kwon201107_XENLA_00105589	-1.07723	4.61601	53.9688	2.03694e-13	1.75598e-11
EEF1A2_XeXenL6RMv10025171m	-2.38748	1.53603	53.6232	2.42873e-13	2.08511e-11
ADMP2_Ismailoglu201203_XENLA_00055348	-1.0628	6.13245	53.6139	2.44032e-13	2.08648e-11
AG1_Quigley201207_XENLA_00029258	1.17268	5.3583	53.514	2.56754e-13	2.18629e-11
NA_Quigley201207_XENLA_00062965	-1.22734	4.29508	53.4767	2.61679e-13	2.21917e-11
ABCA1_Ismailoglu201203_XENLA_00052619	-1.81333	4.09783	53.3838	2.74351e-13	2.31063e-11
BC071053.1	-1.03481	5.44095	53.3814	2.74679e-13	2.31063e-11
FAM214A_Taira201203_XENLA_stage_00042784	-1.12103	4.96127	53.3609	2.77561e-13	2.32549e-11
MYH13_XeXenL6RMv10046990m	-1.87221	2.30777	53.151	3.08875e-13	2.5775e-11
HEBP2_XeXenL6RMv10003514m	-2.02739	2.35194	52.863	3.57642e-13	2.97256e-11
NA_XeXenL6RMv10037064m	-1.50968	3.4355	52.8416	3.61568e-13	2.99326e-11
PSMD14_Taira201203_XENLA_stage_00119967	-1.50362	3.88074	52.0761	5.33902e-13	4.40248e-11
ODZ4_Taira201203_XENLA_stage_00008956	-2.41732	1.38249	51.9001	5.83971e-13	4.79638e-11
DOCK2_Taira201203_XENLA_tissue_00049111	-2.38927	2.73476	51.6015	6.79891e-13	5.56231e-11
NA_Horb201201_XENLA_00114479	-2.42996	1.19902	51.5892	6.84173e-13	5.56724e-11
FOXA2_Quigley201112_XENLA_00082222	-0.986985	6.2367	51.5844	6.8583e-13	5.56724e-11
GTF2A1_TC414887	-0.760119	7.33936	51.2857	7.98548e-13	6.4571e-11
AF212198.2	0.981079	5.43602	51.1145	8.71334e-13	7.01845e-11
NA_Taira201203_XENLA_stage_00034511	-1.43281	4.18072	50.8865	9.78627e-13	7.85235e-11
MARCH8_TeperekTkacz201206_XENLA_00094067	-1.09334	4.47271	50.8695	9.8718e-13	7.89063e-11
FAM189A2_Taira201203_XENLA_tissue_00202049	-1.33542	3.5646	50.7427	1.05304e-12	8.38492e-11
KCNK5_Taira201203_XENLA_stage_00173307	-0.934678	6.21797	50.7264	1.0618e-12	8.42257e-11
STOX1_Ismailoglu201203_XENLA_00040261	-0.917467	7.11118	50.5155	1.18225e-12	9.34247e-11
CHRD_XeXenL6RMv10014175m	-0.669254	9.39896	50.2762	1.33563e-12	1.05147e-10
FAM212B_Kwon201107_XENLA_00007517	-2.64382	1.0771	50.2359	1.36329e-12	1.06921e-10
SLC12A3.2_TeperekTkacz201206_XENLA_00055122	-0.695635	10.0842	50.2132	1.37919e-12	1.07763e-10
PTPN3_Taira201203_XENLA_tissue_00226333	-1.655	3.02634	50.0939	1.46564e-12	1.1409e-10
QSOX1_Kwon201107_XENLA_00103394	-2.33529	1.6016	49.9148	1.60567e-12	1.24526e-10
MN1_Taira201203_XENLA_stage_00064145	1.28741	4.48708	49.8579	1.65295e-12	1.27718e-10
MYLK_Taira201203_XENLA_tissue_00200768	-2.56587	0.74439	49.6136	1.87211e-12	1.44118e-10
GPR65_Quigley201112_XENLA_00067836	-1.18103	4.32188	49.3538	2.13721e-12	1.63921e-10
NM_001091808.1	-1.44241	4.21453	49.1924	2.32045e-12	1.76935e-10
CYP27C1_XeXenL6RMv10007439m	-2.3795	3.85886	49.1895	2.32386e-12	1.76935e-10
SOCS4_Taira201203_XENLA_stage_00005864	-1.36893	4.02659	49.1048	2.42646e-12	1.84076e-10
SNRK_Taira201203_XENLA_stage_00057657	-1.20422	4.13883	49.0457	2.50066e-12	1.89018e-10
BC044008.1	-0.768194	7.65209	48.8542	2.75708e-12	2.07647e-10
GDF10_Taira201203_XENLA_stage_00133363	1.78212	2.16995	48.6997	2.98307e-12	2.23859e-10
LPIN2_Taira201203_XENLA_tissue_00042375	-1.42312	3.71159	48.6805	3.01243e-12	2.25252e-10
ITGA6_Taira201203_XENLA_tissue_00193984	-1.48958	4.22486	48.6103	3.1223e-12	2.32634e-10
NM_001088927.1	-2.12057	3.27567	48.5956	3.14569e-12	2.33543e-10
CLCN2_Taira201203_XENLA_tissue_00146000	-1.79728	2.4628	48.5516	3.2171e-12	2.37997e-10
CASK_Ismailoglu201203_XENLA_00022117	-1.0694	4.48498	48.5056	3.29346e-12	2.42785e-10
NM_001127827.1	-0.836552	5.9873	48.4255	3.43071e-12	2.52012e-10
NA_TeperekTkacz201202_XENLA_00148454	6.11996	-0.847124	48.2808	3.69347e-12	2.70362e-10
BAIAP2_Taira201203_XENLA_tissue_00236698	-1.38962	4.03373	48.1312	3.98627e-12	2.90775e-10
CRABP2_TeperekTkacz201206_XENLA_00064863	-1.19554	6.70038	47.9445	4.38445e-12	3.18705e-10
FREM2_XeXenL6RMv10000514m	-1.3809	3.47506	47.8851	4.51936e-12	3.27371e-10
RUNX1_TeperekTkacz201206_XENLA_00081065	-1.61168	2.39379	47.7403	4.86584e-12	3.5125e-10
TTC34_Taira201203_XENLA_tissue_00215799	-1.42765	3.10565	47.5431	5.38088e-12	3.87089e-10
NM_001092482.1	-1.11368	4.42774	47.4396	5.67254e-12	4.06668e-10
DOPEY2_TC413460	-0.970525	5.71733	47.3907	5.81592e-12	4.15194e-10
CIC_Taira201203_XENLA_tissue_00281877	-1.08388	5.41283	47.3855	5.83126e-12	4.15194e-10
GPR45_Taira201203_XENLA_tissue_00055901	-1.84752	1.81161	47.2942	6.10938e-12	4.33517e-10
NM_001093357.1	-1.67629	2.39503	47.1879	6.44964e-12	4.5611e-10
CA14_Ismailoglu201203_XENLA_00030232	-0.926331	7.103	47.1145	6.69599e-12	4.71931e-10
BCKDK_Taira201203_XENLA_tissue_00009790	-0.785733	6.70207	47.0527	6.91025e-12	4.85392e-10
F7C6Z8_XENTR_Taira201203_XENLA_tissue_00240266	-1.11641	4.13022	47.0154	7.04315e-12	4.91996e-10
FBXO32_TeperekTkacz201206_XENLA_00005650	-1.39658	3.04949	47.0131	7.05142e-12	4.91996e-10
RASL11B_TeperekTkacz201206_XENLA_00026584	-1.03524	7.10201	46.9166	7.40723e-12	5.14735e-10
BC073563.1	-1.77762	3.32647	46.9115	7.42667e-12	5.14735e-10
NM_001096363.1	-0.82483	8.22298	46.8812	7.54226e-12	5.21016e-10
MRC2_Quigley201112_XENLA_00042227	-2.04488	2.06029	46.8358	7.71897e-12	5.31463e-10
NM_001096383.1	-0.689804	9.53942	46.7111	8.22632e-12	5.64531e-10
NA_Horb201201_XENLA_00150999	-2.0228	1.65824	46.6636	8.42782e-12	5.76463e-10
FAM169A_Taira201203_XENLA_stage_00215851	-1.51413	3.27904	46.6551	8.4647e-12	5.77094e-10
NM_001091212.1	-0.635657	8.7699	46.5365	8.99261e-12	6.11088e-10
AOX1_Quigley201112_XENLA_00049525	-1.32039	3.53415	46.4744	9.28228e-12	6.28724e-10
EBF2_Taira201203_XENLA_stage_00131856	-2.55883	1.18273	46.4141	9.5726e-12	6.4629e-10
AACS_Taira201203_XENLA_stage_00157021	-1.51117	3.73644	46.2557	1.03785e-11	6.98443e-10
NA_Taira201203_XENLA_tissue_00046894	-1.00364	4.96908	45.9959	1.18501e-11	7.94907e-10
ENC1_TC416767	-0.795344	7.12099	45.8342	1.28699e-11	8.60548e-10
TSPAN2_Taira201203_XENLA_stage_00025283	-2.0805	1.98935	45.6418	1.41978e-11	9.46309e-10
OSR1_Park201106_XENLA_00039544	-1.35547	3.20536	45.609	1.44375e-11	9.59217e-10
GTPBP2_Kwon201107_XENLA_00114662	-0.989629	5.09828	45.1178	1.85533e-11	1.22876e-09
AF081350.1	-0.866724	7.16861	45.0363	1.93418e-11	1.27692e-09
IRX2_TC416945	0.822158	5.97889	44.9711	1.99967e-11	1.316e-09
CDC6_Ismailoglu201203_XENLA_00008230	0.692081	8.06822	44.9633	2.00767e-11	1.31711e-09
TNKS2_Taira201203_XENLA_stage_00155785	-0.623736	8.76729	44.7846	2.19946e-11	1.43841e-09
NA_Taira201203_XENLA_tissue_00271027	-1.5848	2.97538	44.6755	2.32549e-11	1.51608e-09
PKP1_Taira201203_XENLA_tissue_00019803	-1.0993	4.65683	44.5302	2.50458e-11	1.62774e-09
CHN2_Taira201203_XENLA_tissue_00138490	-1.67497	1.97134	44.3811	2.70281e-11	1.75112e-09
DAPL1_XeXenL6RMv10023171m	-1.05052	4.69864	44.359	2.73346e-11	1.76549e-09
TRIM67_Ismailoglu201203_XENLA_00046035	-0.972191	5.13244	44.3346	2.76785e-11	1.78219e-09
CYP1A1_Taira201203_XENLA_tissue_00087286	1.2308	3.81415	44.304	2.81136e-11	1.80463e-09
TBL1X_Taira201203_XENLA_stage_00210260	-1.09968	4.76276	44.2536	2.88473e-11	1.84605e-09
SGK223_Ismailoglu201203_XENLA_00013157	-0.712631	7.47107	43.9863	3.30689e-11	2.10435e-09
IQCA1_Taira201203_XENLA_tissue_00108457	-1.3921	3.84153	43.9853	3.30854e-11	2.10435e-09
SFRPX_Taira201203_XENLA_tissue_00126173	-1.49282	3.3347	43.9542	3.36154e-11	2.13156e-09
SPOPL_Ismailoglu201203_XENLA_00056404	-1.1302	4.61284	43.8067	3.62467e-11	2.29145e-09
NA_Taira201203_XENLA_stage_00119658	-0.784279	6.79773	43.752	3.72726e-11	2.34919e-09
NT5C1A_Taira201203_XENLA_stage_00007549	-0.837389	5.7145	43.6948	3.83792e-11	2.41165e-09
TMC5_XeXenL6RMv10055056m	-2.42293	0.875299	43.5758	4.07848e-11	2.55511e-09
NP_001135511.1_XeXenL6RMv10017715m	-1.08092	5.42077	43.3103	4.67124e-11	2.91771e-09
NM_001097873.1	-1.95822	2.45932	43.1977	4.94782e-11	3.08124e-09
ARG2_XeXenL6RMv10031934m	-1.26876	4.18208	43.162	5.0389e-11	3.12862e-09
NA_Taira201203_XENLA_stage_00183712	-1.97273	1.46117	43.0936	5.2182e-11	3.22518e-09
DSEL_Kwon201107_XENLA_00003761	-1.67265	2.22839	43.091	5.22534e-11	3.22518e-09
NM_001090383.1	-1.80214	5.69858	42.9176	5.70948e-11	3.50924e-09
GEMC1_Ismailoglu201203_XENLA_00022335	1.29891	3.32523	42.9143	5.71921e-11	3.50924e-09
MYH13_XeXenL6RMv10051860m	-2.53031	0.65913	42.9047	5.74712e-11	3.51602e-09
FOXR1_Ismailoglu201203_XENLA_00038218	-1.88247	1.70819	42.8959	5.77302e-11	3.52154e-09
NUAK2_Ismailoglu201203_XENLA_00034465	-0.704523	7.73566	42.8342	5.95821e-11	3.62391e-09
GM101_Quigley201207_XENLA_00112929	-1.6829	1.82257	42.7274	6.29251e-11	3.81612e-09
FOXO3_Ismailoglu201203_XENLA_00057161	-1.53214	2.32182	42.7185	6.3211e-11	3.82234e-09
MAP3K8_Taira201203_XENLA_tissue_00274533	-1.07076	4.16273	42.6878	6.42127e-11	3.87169e-09
BPNT1_XeXenL6RMv10029821m	-0.915002	6.36153	42.5538	6.87642e-11	4.13417e-09
KDM4C_Kwon201107_XENLA_00015236	-0.933028	4.86355	42.4084	7.40698e-11	4.44036e-09
GALNT5_Park201106_XENLA_00094661	-1.7215	1.87874	42.3897	7.47843e-11	4.47034e-09
NM_001090002.1	-1.23172	4.47658	42.3478	7.64025e-11	4.55403e-09
MAP1LC3A_TC420179	-1.30904	3.35146	42.2383	8.0801e-11	4.80248e-09
AGRN_Taira201203_XENLA_tissue_00124619	-1.13329	4.56269	42.2217	8.14902e-11	4.82968e-09
KIAA1731_Taira201203_XENLA_stage_00212208	-1.76294	2.80152	41.9956	9.14791e-11	5.40634e-09
USP2_Ismailoglu201203_XENLA_00054705	-2.73883	1.89859	41.9363	9.42963e-11	5.55709e-09
LOC728026_Chung201110_XENLA_00018687	0.658554	10.0494	41.9115	9.55016e-11	5.61227e-09
FGFR2_XeXenL6RMv10045165m	-0.798125	6.62865	41.8832	9.68903e-11	5.67788e-09
BC154975.1	-1.92228	2.90459	41.872	9.74467e-11	5.67923e-09
RIOK3_TeperekTkacz201206_XENLA_00127218	-0.874496	7.2504	41.8718	9.74578e-11	5.67923e-09
PDE8B_XeXenL6RMv10018057m	-1.95452	1.25406	41.7989	1.01158e-10	5.87845e-09
KLHL2_Audic201207_XENLA_00001089	-1.38296	3.02805	41.7667	1.02838e-10	5.95946e-09
MAN2A2_Taira201203_XENLA_tissue_00175838	-1.27842	3.39856	41.6689	1.08117e-10	6.24801e-09
S83518.1	-0.610154	9.23011	41.6607	1.08568e-10	6.25675e-09
NA_Park201106_XENLA_00086077	-0.721463	7.21768	41.6291	1.10337e-10	6.3412e-09
CKMT1B_Taira201203_XENLA_stage_00069915	-1.11008	4.6755	41.4615	1.20218e-10	6.8901e-09
WFS1_XeXenL6RMv10002294m	-0.876013	6.13131	41.4466	1.21133e-10	6.92348e-09
FOXI4.1_Quigley201112_XENLA_00036813	1.47858	2.44128	41.4405	1.21512e-10	6.92617e-09
DOCK7_Taira201203_XENLA_stage_00107443	-0.93188	4.81897	41.4322	1.2203e-10	6.93675e-09
NA_Taira201203_XENLA_tissue_00274953	-1.45725	3.12406	41.4035	1.23836e-10	7.02029e-09
CAMK2N2_Taira201203_XENLA_tissue_00290174	-1.16441	3.95681	41.3107	1.29859e-10	7.34176e-09
BC082847.1	0.767528	7.12939	41.2987	1.30657e-10	7.36593e-09
SSH2_Ismailoglu201203_XENLA_00060736	-0.780816	6.62913	41.2937	1.30992e-10	7.36593e-09
NM_001097921.1	-0.781721	7.68014	41.2719	1.3246e-10	7.42842e-09
NCOR2_Taira201203_XENLA_tissue_00098081	-1.67904	2.912	41.1232	1.42928e-10	7.99399e-09
HIST2H3C1.1_Taira201203_XENLA_stage_00209243	0.715809	6.79636	41.0214	1.50571e-10	8.39896e-09
EYA1_Kwon201107_XENLA_00020498	1.47968	2.46443	41.0133	1.51195e-10	8.41126e-09
DLC1_Quigley201207_XENLA_00096702	-0.781371	7.12005	40.9092	1.59469e-10	8.83372e-09
GRASP_Taira201203_XENLA_tissue_00109197	-0.930693	5.92036	40.9072	1.59635e-10	8.83372e-09
CXORF57_XeXenL6RMv10045091m	-0.799541	6.67219	40.8723	1.62504e-10	8.9687e-09
MYO5B_Park201106_XENLA_00178032	-1.34104	3.48162	40.6934	1.78089e-10	9.80288e-09
NM_001170450.1	-1.01723	5.85373	40.5379	1.92842e-10	1.05871e-08
NA_Taira201203_XENLA_tissue_00270185	-3.29066	0.58626	40.3802	2.09046e-10	1.14465e-08
NA_XeXenL6RMv10007752m	-2.30464	1.45634	40.1477	2.35463e-10	1.28592e-08
REV3L_Ismailoglu201203_XENLA_00067433	-0.876208	5.63507	40.0199	2.51391e-10	1.36932e-08
APLNR_TC437685	-0.749952	7.53618	40.0112	2.52504e-10	1.37181e-08
MADD_Taira201203_XENLA_tissue_00210984	-1.05861	4.34907	39.9588	2.59382e-10	1.40551e-08
OSR1_Taira201203_XENLA_stage_00176560	-0.79753	5.76962	39.7824	2.83889e-10	1.53432e-08
XB-GENE-992550_Kwon201107_XENLA_00099637	-2.34634	0.867307	39.6444	3.04677e-10	1.64242e-08
SRGAP1_Taira201203_XENLA_tissue_00098895	1.22354	3.51812	39.6259	3.07584e-10	1.65382e-08
CMTM8_Quigley201207_XENLA_00049952	-0.888456	6.40594	39.5795	3.1498e-10	1.68923e-08
ROBO4_Taira201203_XENLA_tissue_00127084	-1.76476	2.34142	39.4593	3.3497e-10	1.79183e-08
PSAT1_Taira201203_XENLA_stage_00185773	-1.03959	4.16941	39.4326	3.39581e-10	1.81185e-08
JUN_TC418666	-1.48402	2.86007	39.3397	3.56122e-10	1.89526e-08
NA_Taira201203_XENLA_tissue_00211992	-1.33142	3.11407	39.1678	3.88897e-10	2.06442e-08
PSAT1_TeperekTkacz201202_XENLA_00044132	1.08141	4.35237	39.0169	4.20144e-10	2.22463e-08
BC087471.1	0.834277	5.94619	38.9995	4.23916e-10	2.23892e-08
NM_001087265.1	-1.56895	2.87074	38.9401	4.37004e-10	2.30222e-08
FAM13A_Kwon201107_XENLA_00073252	-1.60233	2.93807	38.8874	4.48977e-10	2.35512e-08
NA_Taira201203_XENLA_tissue_00189999	-0.802831	5.39907	38.8859	4.49303e-10	2.35512e-08
FOXI1_Taira201203_XENLA_tissue_00089622	1.94434	3.81977	38.7792	4.74569e-10	2.48132e-08
NA_TeperekTkacz201206_XENLA_00116932	2.35499	1.00123	38.7235	4.88293e-10	2.54669e-08
NA_Quigley201112_XENLA_00056189	-1.34049	4.80837	38.7033	4.93377e-10	2.56325e-08
JUND_Taira201203_XENLA_stage_00028201	-1.45008	3.86888	38.7011	4.93925e-10	2.56325e-08
PHLDA2_Quigley201112_XENLA_00024162	-1.4463	2.69726	38.6808	4.99096e-10	2.58366e-08
BMF_Taira201203_XENLA_tissue_00152162	-1.40877	3.67345	38.6516	5.06618e-10	2.6161e-08
NM_001172060.1	-0.631865	9.69726	38.5854	5.24108e-10	2.69974e-08
BC072844.1	-1.07575	4.18903	38.5755	5.26756e-10	2.70669e-08
ANKRD32_Taira201203_XENLA_tissue_00140172	-1.34023	3.00209	38.5633	5.30052e-10	2.71694e-08
SMARCA5_Ismailoglu201203_XENLA_00073603	0.817108	7.24113	38.4988	5.47884e-10	2.80146e-08
HSPB8_Audic201207_XENLA_00000377	-2.38143	3.16574	38.476	5.54313e-10	2.8274e-08
SLC26A11_TeperekTkacz201202_XENLA_00049624	-0.807627	7.71673	38.4603	5.58785e-10	2.84326e-08
NM_001086719.1	-0.930733	4.78706	38.4334	5.66558e-10	2.8758e-08
NM_001099881.1	-1.8423	3.20469	38.4026	5.75552e-10	2.91436e-08
CHST12_Taira201203_XENLA_tissue_00148004	-1.11192	4.03	38.3042	6.05335e-10	3.05775e-08
SVIL_Taira201203_XENLA_stage_00051576	-1.22274	5.06112	38.1815	6.44598e-10	3.24821e-08
NA_Chung201110_XENLA_00014361	-1.16661	3.84445	38.1421	6.57739e-10	3.30645e-08
NM_001088873.1	-2.03892	0.889661	38.1083	6.69233e-10	3.35614e-08
LZTS1_Ismailoglu201203_XENLA_00050280	-1.03578	4.14715	38.0099	7.03861e-10	3.52133e-08
GALNT7_Taira201203_XENLA_tissue_00059014	-1.02647	5.53059	37.9701	7.18361e-10	3.58527e-08
RNF223_Taira201203_XENLA_tissue_00039506	-1.78367	1.40073	37.8608	7.59768e-10	3.78288e-08
TGM1_Taira201203_XENLA_tissue_00093217	-2.62654	0.633316	37.8224	7.74873e-10	3.84891e-08
ARHGAP17_Quigley201207_XENLA_00025427	-0.693698	7.4338	37.7809	7.91519e-10	3.92225e-08
HES3.1_Ismailoglu201203_XENLA_00072500	-0.784277	5.84256	37.6268	8.56616e-10	4.23477e-08
LITAF_Taira201203_XENLA_tissue_00109834	-0.706984	6.86693	37.5955	8.70428e-10	4.29288e-08
CROCC_TeperekTkacz201206_XENLA_00048683	-0.908857	5.53693	37.573	8.80558e-10	4.33259e-08
TMEM125_Taira201203_XENLA_tissue_00169772	-1.9688	1.72016	37.4845	9.21412e-10	4.52294e-08
CHMP1B_Kwon201107_XENLA_00008541	-0.938848	5.40452	37.4397	9.42855e-10	4.61734e-08
ENTPD4_Taira201203_XENLA_stage_00193867	-0.87664	4.94386	37.3311	9.96844e-10	4.8703e-08
FLT1_TC416187	-1.08961	3.6786	37.3069	1.00929e-09	4.9196e-08
NM_001090453.1	1.21958	4.41927	37.2812	1.02264e-09	4.97301e-08
LHB_XeXenL6RMv10026001m	-2.29707	1.73627	37.2164	1.0572e-09	5.12912e-08
NM_001110751.1	-1.76642	1.54664	37.1651	1.08539e-09	5.25367e-08
NBEAL2_Taira201203_XENLA_tissue_00004659	-1.18706	3.8744	37.1258	1.10748e-09	5.3482e-08
ATP11A_XeXenL6RMv10032557m	-2.21137	1.10443	37.0656	1.1422e-09	5.50315e-08
SFRPX_TC417898	-2.00339	1.09746	37.0449	1.15441e-09	5.54915e-08
C20ORF151_Quigley201112_XENLA_00093004	-1.10433	4.1239	37.0385	1.15819e-09	5.55452e-08
WIPF1_Taira201203_XENLA_tissue_00150159	-2.00543	0.974862	36.9906	1.18698e-09	5.67952e-08
BLVRB_Taira201203_XENLA_stage_00169730	-1.70213	2.49144	36.9544	1.20927e-09	5.77297e-08
HNF4A_XeXenL6RMv10008140m	-1.46003	2.04051	36.8372	1.28414e-09	6.11638e-08
MYH14_XeXenL6RMv10052947m	-1.2109	3.56721	36.6444	1.41769e-09	6.7371e-08
DENND2C_Taira201203_XENLA_stage_00125967	-0.779029	5.66633	36.3415	1.65597e-09	7.85154e-08
CNN1_Ismailoglu201203_XENLA_00072446	0.600324	7.97794	36.3249	1.67018e-09	7.901e-08
BC058326.1	1.2812	2.95524	36.0856	1.88833e-09	8.91274e-08
NM_001086843.1	-0.822774	5.29006	36.05	1.9232e-09	9.05685e-08
IL16_XeXenL6RMv10001185m	-1.88966	1.06188	36.034	1.93906e-09	9.11097e-08
PLEKHG1_Taira201203_XENLA_tissue_00055116	-0.980624	4.29736	36.0149	1.95817e-09	9.18007e-08
ARMC4_Quigley201112_XENLA_00112795	-1.54928	2.87853	35.881	2.0974e-09	9.81076e-08
SMARCA5_Horb201201_XENLA_00203481	0.686389	6.73991	35.7758	2.21378e-09	1.0332e-07
TSPAN2_XeXenL6RMv10042074m	-4.07687	-0.725813	35.6381	2.37589e-09	1.10638e-07
WDR66_Taira201203_XENLA_stage_00061875	-1.57415	1.89885	35.6045	2.41724e-09	1.12313e-07
ARHGAP17_TeperekTkacz201206_XENLA_00110647	-0.967929	5.07393	35.5774	2.45119e-09	1.13489e-07
PTGS1_Taira201203_XENLA_stage_00161616	-1.13847	4.0828	35.5756	2.45344e-09	1.13489e-07
STOX1_Taira201203_XENLA_stage_00121654	-0.737053	7.32172	35.5206	2.52368e-09	1.1648e-07
GLIS2_TC452573	-1.58047	1.79088	35.4791	2.57799e-09	1.18724e-07
WHSC1_XeXenL6RMv10053021m	0.727583	6.15881	35.4417	2.62806e-09	1.20763e-07
NT5DC2_Ismailoglu201203_XENLA_00023651	-0.608187	9.07554	35.4153	2.66389e-09	1.22141e-07
C2ORF77_TeperekTkacz201206_XENLA_00068940	-1.10709	3.86854	35.3909	2.69743e-09	1.23407e-07
NCOA1_Taira201203_XENLA_tissue_00165583	-1.28571	2.92331	35.2935	2.83571e-09	1.2945e-07
PRRG4_Ismailoglu201203_XENLA_00057894	0.676935	6.71986	35.1927	2.98634e-09	1.36029e-07
NA_Taira201203_XENLA_tissue_00110593	-1.62593	4.04787	35.1301	3.08393e-09	1.40168e-07
ALDH1A2_Ismailoglu201203_XENLA_00002724	-0.627725	8.4511	35.0723	3.17684e-09	1.44077e-07
RBM20_Taira201203_XENLA_tissue_00141533	-0.716342	6.92817	35.0384	3.23262e-09	1.46288e-07
CDK5RAP2_mgEST_Xl4jul2012_1013113903	-1.19969	3.49781	34.9301	3.41749e-09	1.54319e-07
KDM2A_Ismailoglu201203_XENLA_00058363	-0.671768	6.51616	34.7534	3.74221e-09	1.68618e-07
OTX1_Taira201203_XENLA_tissue_00116631	1.22337	2.98032	34.7237	3.79986e-09	1.70846e-07
FHL3_Ismailoglu201203_XENLA_00020633	-0.746154	5.67515	34.6585	3.92913e-09	1.76279e-07
PRDM14_Ismailoglu201203_XENLA_00017418	2.18014	0.857377	34.5628	4.12719e-09	1.84767e-07
FGF10_Taira201203_XENLA_tissue_00010125	-1.53542	1.72561	34.5455	4.16408e-09	1.8602e-07
GAS7_TC414974	-1.28535	3.00186	34.5112	4.23798e-09	1.88916e-07
C16ORF57_Taira201203_XENLA_tissue_00066510	-0.725345	5.724	34.4536	4.36533e-09	1.94178e-07
NA_Quigley201207_XENLA_00067112	-1.70864	1.58384	34.4034	4.47931e-09	1.98824e-07
NA_Taira201203_XENLA_tissue_00268520	-2.49225	0.326381	34.1105	5.20691e-09	2.30629e-07
NA_Taira201203_XENLA_tissue_00088125	-2.97949	-0.137921	33.9409	5.68127e-09	2.51107e-07
ADRB2_Taira201203_XENLA_tissue_00258486	-1.06738	4.69644	33.9227	5.73445e-09	2.52922e-07
ATP5A1_TC428730	0.719676	6.48912	33.8993	5.80403e-09	2.55211e-07
E1BYU7_CHICK_Taira201203_XENLA_stage_00138151	-0.950383	4.71622	33.897	5.81081e-09	2.55211e-07
K1C18_XENTR_Taira201203_XENLA_stage_00059755	-0.676596	7.54437	33.6287	6.67012e-09	2.92336e-07
LPAR2_XeXenL6RMv10012537m	-0.755594	5.9434	33.5867	6.81563e-09	2.98087e-07
FAT1_Taira201203_XENLA_stage_00175411	-0.805538	5.3345	33.5686	6.87931e-09	3.00243e-07
RUSC2_XeXenL6RMv10008721m	-3.04549	-0.435831	33.4554	7.29186e-09	3.17584e-07
CASC4_Taira201203_XENLA_tissue_00227329	-1.07451	3.49831	33.3675	7.62901e-09	3.31576e-07
NCOA1_Quigley201112_XENLA_00118375	-1.3019	2.78269	33.3407	7.73463e-09	3.35468e-07
MN1_Ismailoglu201203_XENLA_00041117	-0.720161	7.79416	33.3092	7.86086e-09	3.40235e-07
NM_001087887.1	-1.02948	5.46486	33.207	8.2851e-09	3.57854e-07
DLX5_Horb201201_XENLA_00125782	0.663262	6.30558	33.143	8.56254e-09	3.69074e-07
BC073105.1	-0.679036	6.79427	33.1167	8.67887e-09	3.73317e-07
NA_XeXenL6RMv10020904m	-2.09906	1.95434	33.1097	8.71035e-09	3.739e-07
NA_Taira201203_XENLA_tissue_00207593	-1.48888	2.28679	33.1032	8.73953e-09	3.74382e-07
DNAH12_XeXenL6RMv10011207m	-1.3618	2.60558	33.0755	8.86507e-09	3.78982e-07
PDZK1_Taira201203_XENLA_tissue_00268900	-1.56715	1.85474	33.0459	9.00084e-09	3.83999e-07
LIF_Taira201203_XENLA_tissue_00291971	-1.4948	2.04388	32.9759	9.33101e-09	3.97273e-07
MRC2_Ismailoglu201203_XENLA_00069949	-1.67646	1.83517	32.9632	9.39205e-09	3.99057e-07
NM_001092342.1	-1.69438	1.52966	32.9577	9.41851e-09	3.99368e-07
GPC4_Taira201203_XENLA_stage_00208167	-0.629479	7.11835	32.915	9.6279e-09	4.07418e-07
NM_001136168.1	0.622093	6.89001	32.9062	9.67125e-09	4.08424e-07
NM_001105268.1	-1.8133	1.32384	32.8851	9.77702e-09	4.12057e-07
MN1_XeXenL6RMv10006960m	1.33271	2.78189	32.8794	9.80555e-09	4.12426e-07
BC082627.1	-0.621645	7.04752	32.8615	9.89633e-09	4.15407e-07
TOP1.1_TeperekTkacz201206_XENLA_00107503	-0.759727	5.52195	32.8384	1.00146e-08	4.19528e-07
NCEH1_Taira201203_XENLA_tissue_00058155	-0.771409	7.69394	32.7592	1.04311e-08	4.36099e-07
KIF18A_Taira201203_XENLA_stage_00027101	-0.80042	5.75722	32.7476	1.04933e-08	4.37824e-07
USP2_Taira201203_XENLA_tissue_00219928	-2.7498	0.387372	32.6932	1.07912e-08	4.49355e-07
FOSL2_Kwon201107_XENLA_00078674	-1.15195	4.17368	32.6658	1.09445e-08	4.5483e-07
CDT1_TeperekTkacz201206_XENLA_00080563	0.658303	7.83853	32.5512	1.16093e-08	4.81496e-07
BCL2L14_Quigley201207_XENLA_00073295	-2.50012	1.81365	32.5019	1.19074e-08	4.9288e-07
NM_001087226.1	1.5485	2.85839	32.3608	1.28041e-08	5.28948e-07
NM_001089653.1	-0.771614	5.68885	32.2863	1.33046e-08	5.48537e-07
USP25_Kwon201107_XENLA_00045155	0.676181	6.66837	32.2257	1.3726e-08	5.64798e-07
DQ096851.1	-0.588478	9.30406	32.1977	1.39253e-08	5.71869e-07
SSH2_XeXenL6RMv10029839m	-0.867355	5.05619	32.0407	1.50973e-08	6.1878e-07
NM_001085920.1	-1.26066	3.52775	31.9615	1.57257e-08	6.43274e-07
BC081244.1	-2.34786	2.11483	31.9381	1.59162e-08	6.49793e-07
WDR86_Park201106_XENLA_00087398	-1.78165	2.52678	31.8938	1.62834e-08	6.63483e-07
NM_001086813.1	-0.891625	4.33086	31.8337	1.67956e-08	6.83022e-07
NA_XeXenL6RMv10040324m	-2.30932	0.254256	31.7383	1.76407e-08	7.15995e-07
DCTN4_TeperekTkacz201202_XENLA_00113696	-0.790073	5.04844	31.655	1.84143e-08	7.45942e-07
RAPGEF5_Taira201203_XENLA_tissue_00262766	-1.16381	3.16145	31.5781	1.91576e-08	7.74545e-07
POU4F1.2_Taira201203_XENLA_tissue_00159942	1.99226	1.44979	31.5498	1.94387e-08	7.84391e-07
BAZ1A_Taira201203_XENLA_tissue_00091551	-0.706846	6.68863	31.5408	1.95292e-08	7.86522e-07
TMCC1_TC451001	-0.705771	6.96945	31.5248	1.9691e-08	7.9151e-07
FAS_Taira201203_XENLA_tissue_00028333	-2.24522	0.699578	31.4562	2.0399e-08	8.18391e-07
MMRN2_Taira201203_XENLA_tissue_00243195	-1.06626	4.27491	31.3897	2.11101e-08	8.45294e-07
RNF130_Ismailoglu201203_XENLA_00013239	-1.16642	3.19324	31.3686	2.13404e-08	8.52881e-07
CRB2_Amin201106_XENLA_00084912	-0.736931	5.40297	31.3366	2.16956e-08	8.65418e-07
NM_001091966.1	-0.759155	5.21412	31.3169	2.19165e-08	8.72562e-07
IL16_Taira201203_XENLA_tissue_00157809	-1.49551	1.81085	31.2909	2.22121e-08	8.82644e-07
SORBS1_Taira201203_XENLA_tissue_00189177	-1.2595	3.57196	31.2815	2.23198e-08	8.8524e-07
FMNL2_Taira201203_XENLA_tissue_00082825	-1.00147	3.7534	31.2433	2.27636e-08	9.01127e-07
TXNRD1_Taira201203_XENLA_tissue_00235674	-1.44191	2.93108	31.1816	2.34984e-08	9.28454e-07
NM_001088485.1	-0.752492	6.35028	31.0818	2.47379e-08	9.75582e-07
MEF2D_Amin201106_XENLA_00096670	-0.927163	4.33994	31.0758	2.48148e-08	9.76766e-07
BC128920.1	-0.574259	7.95585	31.0637	2.49692e-08	9.80992e-07
NA_Quigley201112_XENLA_00093568	-0.810492	4.82188	31.0547	2.50856e-08	9.83714e-07
BPIFC_Taira201203_XENLA_tissue_00072362	-3.00704	0.450632	31.0132	2.56275e-08	1.00308e-06
HES3.1_TC436082	-0.668442	6.15098	31.0043	2.57464e-08	1.00584e-06
GAD2_Quigley201207_XENLA_00025484	0.637539	6.31467	30.9888	2.59517e-08	1.01197e-06
CRABP2_Taira201203_XENLA_stage_00159894	-1.24946	3.62436	30.8966	2.72152e-08	1.05926e-06
RAB39_Taira201203_XENLA_stage_00129194	-2.80072	0.0583291	30.8788	2.74657e-08	1.06702e-06
TP73_Quigley201207_XENLA_00089617	-2.36556	0.161372	30.8497	2.78805e-08	1.08112e-06
C3ORF77_Taira201203_XENLA_tissue_00028057	-1.12214	3.03117	30.8374	2.80581e-08	1.08599e-06
NM_001092514.1	-2.61251	0.802207	30.6966	3.01701e-08	1.16557e-06
NM_001092904.1	-0.747713	5.68261	30.6695	3.05931e-08	1.17973e-06
SMTN_Taira201203_XENLA_tissue_00110126	-0.642667	6.31999	30.6009	3.1694e-08	1.21993e-06
CPAMD8_Ismailoglu201203_XENLA_00019119	-0.785528	6.23856	30.5896	3.18798e-08	1.22482e-06
NM_001088148.1	0.580114	8.4865	30.54	3.27058e-08	1.25424e-06
NM_001127804.1	2.46535	2.51495	30.4488	3.42791e-08	1.31217e-06
NA_Horb201201_XENLA_00162365	-0.961472	5.25215	30.4282	3.4645e-08	1.32374e-06
NM_001095138.1	-1.49069	2.9849	30.3863	3.54027e-08	1.35022e-06
LHFPL2_Quigley201112_XENLA_00050430	-0.924352	4.39361	30.3455	3.61547e-08	1.37639e-06
BET1L_Taira201203_XENLA_stage_00050518	-1.05009	4.46531	30.2768	3.74586e-08	1.42343e-06
NM_001088024.1	-2.72859	-0.155468	30.2573	3.78368e-08	1.43518e-06
IRF5_Taira201203_XENLA_stage_00196232	-1.23407	4.77315	30.2332	3.83105e-08	1.45051e-06
IQSEC3_Ismailoglu201203_XENLA_00046494	1.12619	3.12285	30.2216	3.85398e-08	1.45655e-06
FBXW7_Quigley201207_XENLA_00059382	-0.779673	4.93256	30.2162	3.8647e-08	1.45796e-06
SP6_Taira201203_XENLA_tissue_00262156	-1.44121	2.25088	30.1932	3.91085e-08	1.47271e-06
NA_Taira201203_XENLA_tissue_00111176	-2.50795	1.85762	30.1529	3.99292e-08	1.50091e-06
SDF4_Quigley201207_XENLA_00053925	-0.793953	5.09335	30.1225	4.05607e-08	1.5219e-06
RAD51_Taira201203_XENLA_tissue_00112571	-0.712398	6.46513	30.0902	4.12404e-08	1.54463e-06
CRABP2_Taira201203_XENLA_tissue_00241645	-1.39877	5.47701	30.0857	4.13358e-08	1.54543e-06
RNF223_Ismailoglu201203_XENLA_00053185	-1.15993	3.93196	30.0018	4.3164e-08	1.61089e-06
CYYR1_mgEST_Xl4jul2012_1013087247	0.88993	4.57434	29.9291	4.48142e-08	1.66949e-06
NRP2_Taira201203_XENLA_tissue_00090130	-0.74304	7.54617	29.9068	4.53309e-08	1.68573e-06
CCDC151_Taira201203_XENLA_stage_00152250	-0.968317	4.24261	29.832	4.71143e-08	1.74893e-06
PRDM1_Taira201203_XENLA_tissue_00178910	0.599701	7.30434	29.7583	4.8941e-08	1.81351e-06
RND1_TeperekTkacz201202_XENLA_00006524	-0.621436	6.26371	29.7318	4.96132e-08	1.83516e-06
MN1_Park201106_XENLA_00072263	1.4573	2.41587	29.7228	4.9844e-08	1.84043e-06
CHTOP_Ismailoglu201203_XENLA_00024515	-1.04803	4.455	29.71	5.01758e-08	1.84941e-06
IQUB_Ismailoglu201203_XENLA_00040171	-1.06174	3.44693	29.695	5.05651e-08	1.86048e-06
NA_XeXenL6RMv10010951m	-2.0633	0.871193	29.6618	5.14375e-08	1.88924e-06
NM_001087979.1	0.759986	5.4805	29.6314	5.22529e-08	1.91582e-06
BC139486.1	-0.589479	8.32511	29.5904	5.33688e-08	1.9533e-06
NA_Kwon201107_XENLA_00120888	-1.68507	1.68709	29.5085	5.56733e-08	2.03373e-06
GPR65_XeXenL6RMv10011019m	-1.54425	1.66645	29.5054	5.57613e-08	2.03373e-06
DSCR6_Taira201203_XENLA_stage_00022906	-1.55752	2.30726	29.4813	5.64582e-08	2.05555e-06
RAB34_Quigley201112_XENLA_00065316	-0.704637	5.67354	29.474	5.6672e-08	2.05831e-06
CXCL12_Taira201203_XENLA_tissue_00058018	1.34398	2.01765	29.4713	5.67496e-08	2.05831e-06
RBM20_XeXenL6RMv10032301m	-0.856841	6.02841	29.4684	5.68366e-08	2.05831e-06
NM_001085596.1	1.6714	2.21426	29.4624	5.70115e-08	2.05831e-06
XB-GENE-5936529_XeXenL6RMv10008216m	-1.93008	0.990146	29.4619	5.70273e-08	2.05831e-06
BC044072.1	-1.20471	5.68003	29.4555	5.72165e-08	2.05935e-06
NM_001096883.1	-0.78046	6.58164	29.4542	5.72535e-08	2.05935e-06
CDKN2B_XeXenL6RMv10049366m	-2.5457	0.963726	29.4405	5.76607e-08	2.06838e-06
F7BE52_XENTR_Taira201203_XENLA_tissue_00112606	-0.884827	5.25282	29.4391	5.77029e-08	2.06838e-06
RREB1_Ismailoglu201203_XENLA_00007423	-0.705292	6.06648	29.4155	5.84079e-08	2.09006e-06
EML5_Taira201203_XENLA_stage_00108427	-2.26437	1.3041	29.4059	5.87001e-08	2.09692e-06
SLC22A23_Kwon201107_XENLA_00078111	-0.677193	5.98511	29.37	5.97964e-08	2.13243e-06
CCDC83_XeXenL6RMv10041896m	-1.56131	1.5422	29.2136	6.48218e-08	2.3077e-06
BMPR1B_XeXenL6RMv10018232m	2.24727	0.716619	29.1764	6.6078e-08	2.34842e-06
NA_Taira201203_XENLA_stage_00115332	0.621056	7.42293	29.1656	6.64492e-08	2.35759e-06
NDST1_Quigley201112_XENLA_00059835	0.621179	6.58091	28.9812	7.3084e-08	2.58859e-06
NM_001085597.1	-1.00397	3.42043	28.901	7.61755e-08	2.69277e-06
RIPPLY2.2_XeXenL6RMv10005693m	1.87875	1.37071	28.8972	7.63251e-08	2.69277e-06
NUAK2_Taira201203_XENLA_stage_00028776	-0.655698	5.98162	28.8949	7.64125e-08	2.69277e-06
NM_001092337.1	0.780176	7.14945	28.8087	7.98913e-08	2.81061e-06
USP2_XeXenL6RMv10007214m	-2.38981	0.308325	28.7255	8.3399e-08	2.92908e-06
PTPN14_Taira201203_XENLA_stage_00165409	-0.705423	5.41475	28.7081	8.41501e-08	2.95049e-06
GPR143_TC431179	-0.693297	7.17483	28.554	9.11204e-08	3.18952e-06
AJ421626.1	-3.30819	2.61881	28.5436	9.16137e-08	3.20142e-06
TCF7L1_mgEST_Xl4jul2012_1013251509	0.604948	6.72077	28.5379	9.18833e-08	3.20547e-06
NA_XeXenL6RMv10000748m	0.905009	4.79607	28.5227	9.26076e-08	3.22534e-06
MYCL1_TeperekTkacz201202_XENLA_00008286	0.645094	6.43349	28.5081	9.3309e-08	3.24435e-06
CCNO_Kwon201107_XENLA_00131867	0.997738	4.1678	28.3821	9.95822e-08	3.45671e-06
NA_XeXenL6RMv10044159m	-1.72963	1.1761	28.2757	1.05207e-07	3.6459e-06
GPR56_XeXenL6RMv10009103m	-0.698734	6.1101	28.2382	1.07266e-07	3.70122e-06
NCK2_Taira201203_XENLA_stage_00103758	-0.912343	3.93713	28.2354	1.07424e-07	3.70122e-06
NA_Ismailoglu201203_XENLA_00005139	0.679271	5.84221	28.2353	1.07426e-07	3.70122e-06
ARHGEF17_Ismailoglu201203_XENLA_00004066	-1.16749	2.86577	28.2338	1.07513e-07	3.70122e-06
WDR16_Ismailoglu201203_XENLA_00067115	-0.916131	4.89292	28.2111	1.08777e-07	3.73856e-06
FAM124B_Taira201203_XENLA_tissue_00020081	-1.66224	1.27403	28.1519	1.12157e-07	3.84839e-06
NA_XeXenL6RMv10021379m	-0.676544	7.69822	28.128	1.13553e-07	3.8899e-06
NM_001096034.1	-1.88514	0.548195	28.1181	1.14135e-07	3.90343e-06
LIN28A_Quigley201207_XENLA_00035231	-0.522938	8.78694	28.0156	1.2034e-07	4.10888e-06
TTC12_Quigley201207_XENLA_00021951	-1.22964	3.01328	27.9744	1.22928e-07	4.186e-06
NP_001106619.1_Kwon201107_XENLA_00052712	-0.534523	8.43032	27.9733	1.23e-07	4.186e-06
CAMK2D_Taira201203_XENLA_tissue_00153371	-0.875899	4.18718	27.946	1.24748e-07	4.2386e-06
NM_001093048.1	-2.00054	0.558874	27.9285	1.25883e-07	4.2702e-06
P2RY2_XeXenL6RMv10010198m	-1.03386	3.40542	27.8895	1.28445e-07	4.34389e-06
TCEB3_Taira201203_XENLA_tissue_00260078	-0.746673	6.14777	27.8891	1.28472e-07	4.34389e-06
RAP2B_TC445189	-0.579124	7.08685	27.7849	1.35579e-07	4.5714e-06
KCNK6_TeperekTkacz201206_XENLA_00071471	-0.822061	5.76665	27.7841	1.35639e-07	4.5714e-06
HEXIM1_Taira201203_XENLA_stage_00027316	-0.688307	5.38761	27.7533	1.37811e-07	4.63276e-06
BTG1_Kwon201107_XENLA_00128384	-0.489939	9.55911	27.752	1.37904e-07	4.63276e-06
RND1_Kwon201107_XENLA_00031226	-0.519551	8.26296	27.6151	1.48021e-07	4.96466e-06
TIPARP_TeperekTkacz201202_XENLA_00022607	-0.777014	5.50652	27.5814	1.50618e-07	5.04364e-06
ARL4C_Taira201203_XENLA_tissue_00267617	-0.924015	4.55594	27.5521	1.52915e-07	5.11237e-06
NM_001095085.1	-0.852831	4.49469	27.5457	1.53425e-07	5.11365e-06
F7DUN3_XENTR_Taira201203_XENLA_tissue_00227130	-2.55734	0.197587	27.5455	1.53444e-07	5.11365e-06
CRABP2_Taira201203_XENLA_stage_00059187	-1.03742	4.06861	27.5416	1.53755e-07	5.11585e-06
NM_001085585.1	-1.57375	1.78059	27.5269	1.54924e-07	5.14654e-06
NM_001096711.1	-1.63319	1.50433	27.5186	1.55593e-07	5.15743e-06
DQ096943.1	-0.564156	7.88635	27.5167	1.55746e-07	5.15743e-06
M23238.1	1.02774	3.7284	27.5133	1.56019e-07	5.15828e-06
KCTD12_XeXenL6RMv10024973m	-1.10291	3.16744	27.4166	1.64015e-07	5.41406e-06
FBXO21_XeXenL6RMv10026830m	-1.19617	3.27412	27.3329	1.71272e-07	5.64466e-06
NA_Kwon201107_XENLA_00103357	3.57635	-0.629346	27.2932	1.74824e-07	5.75266e-06
NM_001091889.1	-0.996443	3.91197	27.2259	1.81019e-07	5.94711e-06
NM_001092351.1	-1.08775	3.06394	27.2027	1.83199e-07	6.00926e-06
NM_001086156.1	-0.609037	6.14811	27.1868	1.84712e-07	6.0494e-06
B0BMG0_XENTR_Taira201203_XENLA_stage_00044907	-1.03846	3.55829	27.182	1.85178e-07	6.05516e-06
BC170181.1	-0.549647	8.0515	27.052	1.98056e-07	6.4661e-06
DSCAML1_XeXenL6RMv10042235m	-1.00977	3.50602	27.0101	2.024e-07	6.5976e-06
ECE1_XeXenL6RMv10018800m	-0.754266	5.65364	26.9894	2.04571e-07	6.65796e-06
NM_001094580.1	0.56168	8.21973	26.9402	2.09845e-07	6.81897e-06
AY340103.1	-0.736441	4.81325	26.9146	2.12645e-07	6.89923e-06
NM_001087833.1	0.635473	5.73429	26.8955	2.14754e-07	6.95684e-06
BC142578.1	0.721053	5.83519	26.8707	2.17535e-07	7.03598e-06
NA_XeXenL6RMv10045515m	-1.8158	0.715788	26.8325	2.21879e-07	7.15513e-06
ITGA6_Chung201110_XENLA_00041291	-2.40622	-0.252751	26.8322	2.21904e-07	7.15513e-06
PIK3R6_XeXenL6RMv10047003m	-1.57652	1.21565	26.7321	2.33704e-07	7.52398e-06
ZNF474_Taira201203_XENLA_tissue_00218775	-1.49203	1.37822	26.7211	2.35039e-07	7.55529e-06
LAMC1_Taira201203_XENLA_stage_00021287	-0.588596	7.06082	26.7145	2.3584e-07	7.56936e-06
LYSMD1_Kwon201107_XENLA_00071365	-0.887341	4.15158	26.6712	2.41188e-07	7.72914e-06
KCNN1_XeXenL6RMv10028566m	-2.72717	-0.350744	26.6496	2.439e-07	7.80369e-06
LOC375190_mgEST_Xl4jul2012_1013110096	-1.19706	2.4342	26.6467	2.44263e-07	7.80369e-06
SLC9A3_Taira201203_XENLA_stage_00032015	-0.774335	7.32504	26.6412	2.44966e-07	7.8142e-06
MYO9B_Ismailoglu201203_XENLA_00050735	-0.975604	3.55404	26.622	2.47413e-07	7.88021e-06
NA_Taira201203_XENLA_tissue_00067171	-1.43488	1.70476	26.542	2.57867e-07	8.20063e-06
O93468_CHICK_Taira201203_XENLA_tissue_00110422	-0.590408	6.51409	26.5117	2.61949e-07	8.31776e-06
TMEM55A_Taira201203_XENLA_tissue_00257312	0.87663	3.82772	26.5	2.63539e-07	8.35555e-06
NM_001090747.1	0.524043	8.43468	26.4913	2.64727e-07	8.38047e-06
PWP2_Ismailoglu201203_XENLA_00043302	0.577843	6.91596	26.4082	2.76361e-07	8.73552e-06
SLC9A8_Ismailoglu201203_XENLA_00012179	-0.847373	4.22559	26.399	2.77682e-07	8.75263e-06
PYGL_XeXenL6RMv10019137m	-0.663299	6.08263	26.3986	2.77742e-07	8.75263e-06
XB-GENE-5965587_XeXenL6RMv10055683m	-1.37636	3.3776	26.33	2.87788e-07	9.05554e-06
FBXW7_Quigley201207_XENLA_00092258	-0.837003	4.15301	26.3224	2.88925e-07	9.07763e-06
RFX4_Taira201203_XENLA_stage_00010665	1.72987	0.921864	26.306	2.91387e-07	9.14122e-06
F1NB58_CHICK_Taira201203_XENLA_stage_00165656	-1.38958	1.53372	26.289	2.93959e-07	9.20807e-06
OTUD7B_XeXenL6RMv10019819m	-0.874682	3.93229	26.282	2.95021e-07	9.22747e-06
BCAT2_Taira201203_XENLA_stage_00070542	-0.694355	5.53141	26.2158	3.05311e-07	9.53501e-06
FOXO3_XeXenL6RMv10047160m	-1.6227	0.980001	26.146	3.16551e-07	9.86679e-06
NM_001086456.1	-0.558211	6.98276	26.144	3.1688e-07	9.86679e-06
CAP1_Ismailoglu201203_XENLA_00005575	-0.613981	6.72497	26.1312	3.1899e-07	9.91767e-06
RGS20_Taira201203_XENLA_tissue_00105057	-1.19766	4.95283	26.1247	3.20068e-07	9.9364e-06
ANKRD50_XeXenL6RMv10016768m	-0.746154	4.63727	26.1166	3.21413e-07	9.96331e-06
HEBP2_Taira201203_XENLA_stage_00141334	-1.04122	4.09137	26.1069	3.23022e-07	9.9864e-06
NM_001093850.1	-0.809168	4.79669	26.1064	3.23115e-07	9.9864e-06
S1PR3_TeperekTkacz201206_XENLA_00024033	2.32052	-0.0908972	26.0897	3.25921e-07	1.00582e-05
PLEKHG5_Ismailoglu201203_XENLA_00066558	-0.633055	6.8118	26.0742	3.2854e-07	1.01241e-05
U68059.1	-0.580237	6.68961	26.0548	3.31871e-07	1.02015e-05
ALPL_Park201106_XENLA_00158582	-0.47814	8.80069	26.0538	3.32031e-07	1.02015e-05
LY6G6C_XeXenL6RMv10009950m	-1.38017	3.80655	26.0168	3.38457e-07	1.03837e-05
WTIP_Ismailoglu201203_XENLA_00018428	-1.28774	3.14621	25.996	3.42117e-07	1.04666e-05
DTL_Taira201203_XENLA_stage_00025773	0.962332	3.93785	25.9958	3.42164e-07	1.04666e-05
DSCAML1_Kwon201107_XENLA_00115551	-1.7823	1.08603	25.9761	3.45662e-07	1.05581e-05
XB-GENE-5809273_Kwon201107_XENLA_00074251	-0.623359	5.75825	25.9649	3.4768e-07	1.06042e-05
GLDC_Taira201203_XENLA_stage_00066266	-0.519	8.23957	25.9413	3.51966e-07	1.07193e-05
PRR18_Taira201203_XENLA_tissue_00050024	-1.34059	2.47585	25.9268	3.54617e-07	1.07843e-05
BAZ1B_Ismailoglu201203_XENLA_00015846	0.723566	4.85157	25.909	3.57896e-07	1.08556e-05
OSBP2_Taira201203_XENLA_tissue_00288378	-1.41598	2.77685	25.9084	3.58002e-07	1.08556e-05
NODAL6_Taira201203_XENLA_stage_00003298	-1.94135	1.09222	25.8831	3.62735e-07	1.09831e-05
NP_001072692.1_Ismailoglu201203_XENLA_00004423	0.621212	6.54036	25.8526	3.68514e-07	1.1142e-05
NA_Taira201203_XENLA_stage_00081786	-0.903234	3.8276	25.8377	3.71371e-07	1.12121e-05
NDUFA8_Taira201203_XENLA_stage_00208035	-1.31466	1.96456	25.7934	3.79984e-07	1.14555e-05
ELL2_Quigley201207_XENLA_00036717	-0.611734	7.33161	25.7781	3.8301e-07	1.15301e-05
TRPV5_Taira201203_XENLA_stage_00005768	-1.36727	2.72064	25.7626	3.86105e-07	1.16065e-05
EEF1A1_Taira201203_XENLA_stage_00008071	-0.264308	13.7835	25.7561	3.87398e-07	1.16286e-05
ITPRIP_TeperekTkacz201202_XENLA_00051398	-0.886239	4.22923	25.7503	3.88557e-07	1.16467e-05
NAV3_XeXenL6RMv10028512m	-0.9312	4.25367	25.7319	3.92285e-07	1.17415e-05
GRHL3_TC438795	0.537162	7.68471	25.6787	4.03253e-07	1.20525e-05
EGFLAM_Kwon201107_XENLA_00111824	-0.797456	4.97508	25.6281	4.13966e-07	1.2355e-05
NM_001096464.1	2.80606	0.112535	25.6246	4.14724e-07	1.236e-05
SNRK_XeXenL6RMv10015630m	-1.29535	2.06649	25.6159	4.16585e-07	1.23977e-05
RNF213_Taira201203_XENLA_tissue_00137561	-0.818689	4.44808	25.5642	4.27911e-07	1.27166e-05
OCT91_XeXenL6RMv10031376m	-0.603541	8.03357	25.4648	4.50537e-07	1.337e-05
WNT8A_TeperekTkacz201206_XENLA_00098609	-0.689934	5.605	25.4503	4.5393e-07	1.34515e-05
NEDD9_XeXenL6RMv10026402m	1.87236	2.88445	25.4203	4.61044e-07	1.3643e-05
NCOA6_Ismailoglu201203_XENLA_00057128	0.969334	3.57945	25.4113	4.63187e-07	1.3687e-05
IQGAP1_Kwon201107_XENLA_00034712	-0.581881	6.10792	25.3623	4.75101e-07	1.40192e-05
DMXL1_Kwon201107_XENLA_00103248	-1.15821	3.56024	25.3412	4.8033e-07	1.41535e-05
ARX_Quigley201207_XENLA_00087966	-2.32312	0.539556	25.3289	4.83405e-07	1.4224e-05
KLF11_Taira201203_XENLA_stage_00108941	-0.594259	6.95556	25.3095	4.88303e-07	1.43478e-05
NIN_XeXenL6RMv10019135m	-1.19273	2.39864	25.2979	4.91239e-07	1.44138e-05
NA_Ismailoglu201203_XENLA_00036672	0.654716	5.58189	25.2811	4.95544e-07	1.45197e-05
NM_001090574.1	0.513452	8.66824	25.2132	5.13285e-07	1.50185e-05
DNAJA4.2_Park201106_XENLA_00096986	-1.05106	3.20077	25.18	5.22198e-07	1.52578e-05
LHFPL2_Quigley201207_XENLA_00018019	-0.986807	3.34099	25.1704	5.24818e-07	1.5313e-05
RORB_Kwon201107_XENLA_00122609	-2.42544	0.372277	25.1627	5.26908e-07	1.53525e-05
NM_001094589.1	-0.568001	7.75821	25.1584	5.2808e-07	1.53652e-05
ZFHX2_Taira201203_XENLA_tissue_00278923	-1.10108	2.86277	25.1506	5.30233e-07	1.54063e-05
VGLL2_Audic201207_XENLA_00005101	-3.81595	0.926735	25.1394	5.3332e-07	1.54744e-05
NM_001093976.1	0.90668	4.62738	25.1157	5.39909e-07	1.56439e-05
NA_Taira201203_XENLA_stage_00002021	-2.09347	0.186381	25.0839	5.48887e-07	1.58819e-05
ITGA3_Taira201203_XENLA_stage_00003257	-0.924912	3.93877	25.0672	5.53671e-07	1.59982e-05
BC089088.1	-0.72922	4.82687	25.0563	5.56807e-07	1.60666e-05
FLRT2_Taira201203_XENLA_tissue_00158835	-1.23947	2.80121	25.0528	5.57827e-07	1.60737e-05
ITGB6_Taira201203_XENLA_tissue_00185306	-0.826269	4.24774	25.0306	5.6428e-07	1.62373e-05
TTLL13_Quigley201207_XENLA_00027749	-1.2032	2.49998	25.0014	5.72875e-07	1.64619e-05
HEXIM1_Taira201203_XENLA_stage_00032679	-0.584967	6.33122	24.9736	5.81203e-07	1.66782e-05
GMNN_Taira201203_XENLA_stage_00209974	0.668361	5.46025	24.9313	5.94111e-07	1.70252e-05
BC157450.1	0.457474	9.33594	24.8987	6.04244e-07	1.72918e-05
CRYGN_Taira201203_XENLA_tissue_00232659	-2.94122	-0.61078	24.8707	6.13068e-07	1.75098e-05
IGF2_TC421105	-1.26192	3.12258	24.8692	6.1354e-07	1.75098e-05
ANKLE1_Kwon201107_XENLA_00013466	-0.589227	6.04141	24.8358	6.24264e-07	1.77787e-05
NP_001106558.1_XeXenL6RMv10051952m	-0.861562	4.29875	24.833	6.25175e-07	1.77787e-05
ETV6_Taira201203_XENLA_stage_00197969	-0.890668	5.01009	24.832	6.2552e-07	1.77787e-05
TMEM222_Taira201203_XENLA_stage_00177869	-1.02408	3.01611	24.8003	6.35876e-07	1.80485e-05
NM_001086762.1	-0.837978	4.99761	24.761	6.48957e-07	1.83948e-05
NA_Quigley201112_XENLA_00111687	-2.03047	1.0399	24.7513	6.52242e-07	1.84628e-05
SNRK_Taira201203_XENLA_stage_00158084	-1.45296	1.53496	24.7301	6.59464e-07	1.86419e-05
NA_Horb201201_XENLA_00027444	-0.854134	4.59871	24.651	6.87079e-07	1.93963e-05
CADM1_Kwon201107_XENLA_00130885	0.712442	5.15565	24.6378	6.91827e-07	1.95039e-05
TCTE1_Quigley201112_XENLA_00115918	-1.89376	1.31136	24.6336	6.93331e-07	1.95199e-05
LRRN4CL_Taira201203_XENLA_tissue_00097503	-2.29706	0.398964	24.5556	7.21967e-07	2.02987e-05
TMEM116_Taira201203_XENLA_stage_00086462	-1.03481	3.23394	24.545	7.25933e-07	2.03828e-05
CACNA1E_XeXenL6RMv10014933m	-1.82203	0.931012	24.5175	7.36384e-07	2.06484e-05
PLXNA4_TeperekTkacz201202_XENLA_00114368	2.42152	-0.206677	24.4298	7.70677e-07	2.1581e-05
NA_XeXenL6RMv10029390m	-1.00272	3.3201	24.4203	7.74472e-07	2.16468e-05
LPAR3_Taira201203_XENLA_tissue_00136422	-2.47048	-0.0908782	24.4188	7.751e-07	2.16468e-05
FLRT3_TeperekTkacz201206_XENLA_00057784	-0.557173	7.88073	24.3829	7.89677e-07	2.20244e-05
LIM2_Taira201203_XENLA_stage_00127553	-2.01182	1.25402	24.3652	7.96955e-07	2.21977e-05
MVP_TC455082	-0.615335	5.63229	24.2997	8.24498e-07	2.29342e-05
TCF3_XeXenL6RMv10004575m	-0.548054	7.53088	24.2515	8.45428e-07	2.34851e-05
Q28DX7_XENTR_Horb201201_XENLA_00210654	-1.31446	1.64591	24.2477	8.47087e-07	2.34999e-05
PWWP2B_Chung201110_XENLA_00008474	0.717463	4.77641	24.2289	8.55405e-07	2.36992e-05
MMP17_Taira201203_XENLA_stage_00183862	-2.73097	0.301726	24.1993	8.68619e-07	2.40333e-05
ENTPD2_Horb201201_XENLA_00090440	-0.906597	3.60528	24.0741	9.27004e-07	2.56148e-05
MADD_XeXenL6RMv10014922m	-0.933938	3.39323	24.0664	9.30696e-07	2.56828e-05
MRPL37_Taira201203_XENLA_stage_00183949	0.770493	4.58862	24.0479	9.39677e-07	2.58964e-05
FRMD4B_Ismailoglu201203_XENLA_00038497	-0.588256	5.94436	24.038	9.4453e-07	2.59744e-05
PDE12_TC416362	0.544505	6.59751	24.037	9.44999e-07	2.59744e-05
MASP1_TC415014	-1.95859	0.835743	23.971	9.77957e-07	2.68449e-05
SESN2_Taira201203_XENLA_tissue_00113774	-0.704471	4.67708	23.9649	9.81063e-07	2.68948e-05
PKP3_Audic201207_XENLA_00001707	-0.633636	5.37345	23.9138	1.00744e-06	2.75817e-05
NA_Quigley201207_XENLA_00103616	-0.510042	9.22318	23.9105	1.00917e-06	2.75929e-05
TMCO3_Kwon201107_XENLA_00021903	0.860903	4.07881	23.903	1.01315e-06	2.76653e-05
TBC1D20.1_XeXenL6RMv10040903m	-0.962544	3.2735	23.8935	1.01817e-06	2.7766e-05
ATRN_TeperekTkacz201202_XENLA_00031289	-0.831113	4.24995	23.8787	1.026e-06	2.79431e-05
NA_Park201106_XENLA_00125570	-2.46517	-0.334954	23.8277	1.05356e-06	2.86562e-05
DNAI2_Quigley201207_XENLA_00109780	-0.893869	3.7785	23.7895	1.07467e-06	2.91924e-05
TFCP2_Ismailoglu201203_XENLA_00043688	-0.578422	5.96501	23.7689	1.08625e-06	2.94685e-05
LYPD6_Taira201203_XENLA_tissue_00062148	1.58078	1.37321	23.7606	1.09094e-06	2.95574e-05
NM_001086930.1	-0.946093	3.45108	23.7266	1.11037e-06	3.00175e-05
SH3BP1_Taira201203_XENLA_tissue_00260170	-2.25789	0.0799795	23.7259	1.1108e-06	3.00175e-05
RNF24_Taira201203_XENLA_stage_00112871	-1.82289	0.382366	23.6847	1.1348e-06	3.06264e-05
AFAP1L1_Taira201203_XENLA_tissue_00183484	-0.705991	5.52463	23.6718	1.14241e-06	3.07774e-05
C2ORF63_Quigley201207_XENLA_00040172	-1.13284	2.59607	23.6703	1.14335e-06	3.07774e-05
NT5C1B_Taira201203_XENLA_stage_00005535	-1.01747	3.35774	23.6565	1.15156e-06	3.09585e-05
NM_001093305.1	0.75593	4.68958	23.6419	1.16033e-06	3.11542e-05
SBNO2_Ismailoglu201203_XENLA_00013142	-0.822675	4.22035	23.6251	1.17052e-06	3.13873e-05
MPV17L_XeXenL6RMv10041580m	-0.793773	4.5203	23.6109	1.17919e-06	3.15793e-05
NM_001087435.1	0.831593	5.26239	23.6007	1.18542e-06	3.17055e-05
AZI1_Ismailoglu201203_XENLA_00021686	0.522973	7.10182	23.5659	1.20709e-06	3.22438e-05
KIAA1217_Taira201203_XENLA_tissue_00094288	-1.50006	3.17098	23.5153	1.23922e-06	3.30596e-05
DLX5A_Taira201203_XENLA_stage_00038919	0.662047	5.37766	23.4973	1.25086e-06	3.33276e-05
QSOX1_Kwon201107_XENLA_00000608	-0.774329	4.93461	23.4578	1.27687e-06	3.39772e-05
CCDC65_Taira201203_XENLA_tissue_00076266	-1.1154	2.46759	23.4487	1.28289e-06	3.40939e-05
BC075128.1	0.666169	5.24506	23.4121	1.3075e-06	3.47037e-05
UCK2_TeperekTkacz201206_XENLA_00059726	0.847884	4.20914	23.3917	1.32149e-06	3.50305e-05
SPTBN2_XeXenL6RMv10000387m	-0.523139	7.45413	23.3721	1.33501e-06	3.53438e-05
PAQR4_XeXenL6RMv10043386m	-0.826738	4.55061	23.3575	1.34518e-06	3.55312e-05
TCF7_Taira201203_XENLA_stage_00164041	-0.805722	4.30577	23.3571	1.34549e-06	3.55312e-05
NA_Taira201203_XENLA_tissue_00078973	-0.703781	6.61787	23.3319	1.36324e-06	3.59543e-05
XPO6_Taira201203_XENLA_stage_00158057	0.976862	5.58656	23.2913	1.39227e-06	3.66736e-05
NM_001091166.1	1.91518	0.467627	23.2415	1.42879e-06	3.75881e-05
A7MC59_XENTR_XeXenL6RMv10023807m	-0.631984	5.91185	23.2171	1.44707e-06	3.80211e-05
DNAH8_Chung201110_XENLA_00032242	-3.73825	-1.16067	23.2029	1.45781e-06	3.82551e-05
DMPK_Taira201203_XENLA_tissue_00054977	-1.13526	2.41318	23.1906	1.46714e-06	3.84517e-05
FTSJD2_Park201106_XENLA_00061022	-0.805183	4.17399	23.1779	1.47681e-06	3.86565e-05
ING2_Taira201203_XENLA_tissue_00092296	0.964351	3.57879	23.1739	1.47993e-06	3.86697e-05
SLC22A5_Ismailoglu201203_XENLA_00055342	0.540379	7.05053	23.1725	1.48102e-06	3.86697e-05
ACAP3_Taira201203_XENLA_tissue_00009150	-1.25051	1.75267	23.1661	1.48593e-06	3.87492e-05
NM_001095072.1	-0.679877	5.48265	23.1577	1.49242e-06	3.88699e-05
NA_Taira201203_XENLA_stage_00089175	1.25592	3.0086	23.1323	1.51227e-06	3.93379e-05
NA_Taira201203_XENLA_tissue_00045286	-0.967766	3.48578	23.1269	1.5165e-06	3.93989e-05
IMPA2_TeperekTkacz201206_XENLA_00092872	-0.827841	5.04976	23.1209	1.52129e-06	3.94456e-05
TPD52L1_Taira201203_XENLA_tissue_00098856	-1.79259	0.916113	23.1199	1.52208e-06	3.94456e-05
PLEKHG3_XeXenL6RMv10002138m	-0.989372	3.82882	23.1002	1.53772e-06	3.98015e-05
DDIT4_Taira201203_XENLA_tissue_00155885	-0.454189	8.89201	23.0955	1.54154e-06	3.98508e-05
GCNT4_Taira201203_XENLA_tissue_00170838	-1.17608	2.71399	23.0793	1.55455e-06	4.01373e-05
DNAH1_Taira201203_XENLA_tissue_00057826	-1.47064	4.1279	23.0447	1.58278e-06	4.08157e-05
ANKLE1_Kwon201107_XENLA_00026010	-1.01976	3.16995	22.9994	1.62052e-06	4.17374e-05
DENND2A_Park201106_XENLA_00110761	-0.95386	4.18282	22.9652	1.64961e-06	4.24341e-05
NA_Taira201203_XENLA_stage_00068294	-1.0874	2.85022	22.9546	1.65874e-06	4.26166e-05
BC087523.1	-1.28975	2.43051	22.9277	1.68209e-06	4.31632e-05
LRRC9_Quigley201207_XENLA_00068857	-1.54586	2.2116	22.9254	1.68415e-06	4.31632e-05
NRL_Taira201203_XENLA_tissue_00039504	-2.10849	-0.0930456	22.8898	1.7156e-06	4.39153e-05
NA_Taira201203_XENLA_tissue_00265297	1.4883	1.61254	22.8165	1.78229e-06	4.55663e-05
NM_001086916.1	-0.528405	7.02895	22.7958	1.80155e-06	4.60023e-05
IMPDH1_Ismailoglu201203_XENLA_00039639	-0.572318	6.19713	22.783	1.81358e-06	4.6253e-05
D10259.1	0.840778	4.32946	22.749	1.84597e-06	4.70215e-05
FBLIM1_Quigley201207_XENLA_00064131	-0.808008	3.87741	22.7431	1.85167e-06	4.71092e-05
ACAP3_Taira201203_XENLA_stage_00045015	-0.802873	4.30558	22.7251	1.86912e-06	4.74952e-05
NM_001087605.1	-0.547355	8.03139	22.6931	1.90052e-06	4.82343e-05
WEE1_Ismailoglu201203_XENLA_00074025	-0.582955	6.43528	22.645	1.94871e-06	4.93973e-05
SCHIP1_Park201106_XENLA_00158131	-1.12515	2.58771	22.6425	1.95119e-06	4.94e-05
DLEC1_XeXenL6RMv10028877m	-1.20014	2.19492	22.6282	1.96575e-06	4.96969e-05
N4BP3_Taira201203_XENLA_tissue_00273354	-0.787167	4.62708	22.6263	1.96767e-06	4.96969e-05
NA_TeperekTkacz201202_XENLA_00154778	-0.562239	8.52893	22.6082	1.98639e-06	5.0109e-05
ZHX3_Taira201203_XENLA_tissue_00235520	0.87286	3.57913	22.5212	2.07833e-06	5.23649e-05
ZNRF1_Ismailoglu201203_XENLA_00032796	-0.803115	4.52494	22.5133	2.08696e-06	5.25188e-05
RAB33B_Quigley201112_XENLA_00010217	0.597836	5.50678	22.5109	2.08955e-06	5.25208e-05
VANGL1_Taira201203_XENLA_stage_00107524	-0.820357	4.54532	22.4698	2.13476e-06	5.35925e-05
EVX1_TeperekTkacz201202_XENLA_00087137	-0.874956	5.32937	22.4624	2.14303e-06	5.37354e-05
PLEKHA3_XeXenL6RMv10023055m	-1.15228	2.48344	22.4338	2.17508e-06	5.44737e-05
ZNF839_Taira201203_XENLA_tissue_00120547	0.593453	5.7984	22.3773	2.24001e-06	5.60324e-05
HES1_TC421852	-0.978379	3.89469	22.2845	2.351e-06	5.87131e-05
SP5L_Ismailoglu201203_XENLA_00016609	-0.415402	9.95558	22.283	2.3528e-06	5.87131e-05
NA_Quigley201207_XENLA_00043250	-1.05532	2.55883	22.2327	2.41522e-06	6.01987e-05
BC128959.1	-0.817531	4.04268	22.2032	2.45259e-06	6.10572e-05
PTCH1_Kwon201107_XENLA_00035394	1.1036	2.30597	22.1803	2.4821e-06	6.17181e-05
FAT1_Quigley201112_XENLA_00112812	-0.771829	4.51478	22.1508	2.52046e-06	6.25975e-05
EFCAB7_Park201106_XENLA_00008174	-1.12153	2.17214	22.1349	2.54143e-06	6.30431e-05
GLIS2_Audic201207_XENLA_00000197	-1.15448	2.67551	22.1204	2.56081e-06	6.34484e-05
PITPNC1_Taira201203_XENLA_stage_00022154	-1.10815	2.81478	22.1019	2.58549e-06	6.39839e-05
SH3BGRL_Taira201203_XENLA_tissue_00215817	-0.769383	4.60652	22.0721	2.62602e-06	6.49099e-05
FAM189A2_XeXenL6RMv10002368m	-1.35001	1.35217	22.0652	2.63551e-06	6.50674e-05
SLC12A3.2_XeXenL6RMv10028389m	-0.655881	5.16083	22.0415	2.66818e-06	6.57962e-05
SLC12A6_Horb201201_XENLA_00128125	-0.847061	3.76072	22.0025	2.72298e-06	6.70682e-05
BC170295.1	-1.07219	2.83489	21.9688	2.77119e-06	6.81753e-05
SNX18_TC444494	-1.55177	0.907471	21.9354	2.8198e-06	6.92895e-05
YIF1B_Taira201203_XENLA_tissue_00152421	-0.63451	5.28142	21.8787	2.90434e-06	7.12828e-05
BC085223.1	0.64153	5.17419	21.8464	2.95365e-06	7.24031e-05
NCOA2_Taira201203_XENLA_stage_00022582	-0.681554	5.70907	21.8414	2.96139e-06	7.24031e-05
ZC4H2_TC421620	0.638809	5.11895	21.8408	2.9624e-06	7.24031e-05
NA_XeXenL6RMv10052299m	-1.58251	0.858515	21.8398	2.96387e-06	7.24031e-05
CDKN1A_Taira201203_XENLA_tissue_00143446	-1.26506	1.67753	21.828	2.98212e-06	7.27638e-05
MSL2_Quigley201207_XENLA_00114867	0.64233	5.13999	21.7845	3.0506e-06	7.43477e-05
PPP1R12B_Taira201203_XENLA_tissue_00230622	-1.21269	1.84596	21.7721	3.07034e-06	7.47415e-05
FAM208A_Taira201203_XENLA_stage_00085906	-0.649451	5.69577	21.7409	3.12068e-06	7.58784e-05
SHBG_XeXenL6RMv10033605m	-1.71326	1.05007	21.7376	3.12605e-06	7.59204e-05
TSPAN1_Taira201203_XENLA_stage_00032067	-0.550022	7.70136	21.7041	3.18105e-06	7.71663e-05
KCTD1_XeXenL6RMv10005963m	2.072	0.00398977	21.7	3.18791e-06	7.72396e-05
BMP10_XeXenL6RMv10003133m	-2.1827	0.106952	21.6979	3.19148e-06	7.72396e-05
MSI1_Taira201203_XENLA_stage_00208498	0.645103	5.00237	21.6858	3.21164e-06	7.76375e-05
RNF125_Taira201203_XENLA_stage_00177931	1.95043	0.496903	21.6802	3.22095e-06	7.77012e-05
UPK2_mgEST_Xl4jul2012_1013109773	-0.72303	5.35058	21.6798	3.22172e-06	7.77012e-05
NM_001092303.1	-0.513238	6.91131	21.6035	3.35231e-06	8.07574e-05
MANEA_XeXenL6RMv10028413m	1.86203	0.351983	21.5445	3.4572e-06	8.31881e-05
MRC2_TeperekTkacz201202_XENLA_00026284	-1.73681	0.502861	21.5346	3.47504e-06	8.3521e-05
NA_Ismailoglu201203_XENLA_00014390	-2.0391	-0.133813	21.5296	3.484e-06	8.36401e-05
DLX5_Quigley201207_XENLA_00014447	0.659213	5.13513	21.5237	3.49492e-06	8.38057e-05
LSM4_Quigley201207_XENLA_00106001	-0.701965	4.67592	21.4941	3.54912e-06	8.50077e-05
NA_Quigley201112_XENLA_00066579	-0.494497	7.24155	21.4621	3.60889e-06	8.63403e-05
DCAF5_XeXenL6RMv10041344m	-1.23431	2.66983	21.4295	3.6707e-06	8.77184e-05
AGAP2_mgEST_Xl4jul2012_1013121274	-1.44233	1.35487	21.3972	3.7331e-06	8.91075e-05
RHBDD2_XeXenL6RMv10021035m	0.503373	6.81667	21.3473	3.83169e-06	9.13561e-05
AHCYL2_Kwon201107_XENLA_00047311	-0.487251	7.6706	21.2647	4.00025e-06	9.52662e-05
NM_001096467.1	-0.652827	6.87536	21.2528	4.02514e-06	9.569e-05
BSG_Taira201203_XENLA_stage_00064779	0.462185	8.35717	21.2518	4.02722e-06	9.569e-05
COL17A1_Taira201203_XENLA_tissue_00022099	-2.49684	-0.0312861	21.2442	4.04323e-06	9.59611e-05
RHOF_TC419322	-0.742812	4.65033	21.2408	4.05053e-06	9.60252e-05
PIEZO2_Kwon201107_XENLA_00024364	-1.36036	2.0251	21.2117	4.11256e-06	9.73851e-05
LAYN_Kwon201107_XENLA_00048140	-1.88175	1.16672	21.1841	4.1721e-06	9.86332e-05
NM_001089939.1	-1.52896	2.08947	21.1829	4.17472e-06	9.86332e-05
DAG1_Taira201203_XENLA_stage_00143549	-0.63526	5.21427	21.1756	4.1906e-06	9.88963e-05
M11940.1	-0.845326	6.60258	21.1253	4.30213e-06	0.000101414
BC078036.1	1.13929	2.62181	21.0285	4.52513e-06	0.00010655
BC126032.1	-0.969484	2.86961	21.0007	4.59124e-06	0.000107926
SPNS2_Taira201203_XENLA_stage_00083210	-0.776183	3.90907	20.9995	4.59392e-06	0.000107926
NM_001097652.1	-2.65944	-0.916175	20.9949	4.60504e-06	0.000108066
NM_001096250.1	0.900669	4.04056	20.9602	4.68925e-06	0.000109918
NA_Taira201203_XENLA_tissue_00214139	-1.05215	2.43863	20.9577	4.69534e-06	0.000109937
DCAF10_Ismailoglu201203_XENLA_00007937	-0.553343	5.90701	20.9376	4.74481e-06	0.000110971
NM_001087373.1	0.404247	9.28784	20.9287	4.76689e-06	0.000111363
GJB2_Taira201203_XENLA_stage_00124664	-0.55373	8.31801	20.9103	4.81307e-06	0.000112316
COL1A2_Taira201203_XENLA_tissue_00057911	-1.79251	3.30437	20.9015	4.83503e-06	0.000112702
NM_001087494.1	-0.435816	8.86751	20.8985	4.84284e-06	0.000112758
BC158208.1	-1.11044	3.3952	20.8515	4.96308e-06	0.000115427
NP_001123841.1_Taira201203_XENLA_stage_00153981	0.652991	5.03916	20.8494	4.96852e-06	0.000115427
ARHGAP39_Taira201203_XENLA_stage_00027608	-0.55375	6.21799	20.8399	4.99321e-06	0.000115871
STIM2_XeXenL6RMv10042031m	-0.621063	5.07493	20.8311	5.01625e-06	0.000116277
RGS12_Quigley201112_XENLA_00021078	-0.834314	3.91753	20.8026	5.09131e-06	0.000117886
PVRL1_Taira201203_XENLA_tissue_00136425	-0.984979	3.34529	20.7994	5.09984e-06	0.000117952
NA_Taira201203_XENLA_tissue_00243576	-2.51095	-0.0311609	20.7552	5.21883e-06	0.000120571
LMBR1_XeXenL6RMv10026673m	-1.06034	2.62934	20.7446	5.24785e-06	0.000121107
F6WQP1_XENTR_XeXenL6RMv10019714m	1.75221	0.233462	20.7406	5.25888e-06	0.000121227
DQ096915.1	-0.890087	3.96286	20.7365	5.27005e-06	0.000121351
NA_TC415129	-0.799021	4.32901	20.7073	5.35117e-06	0.000123083
NM_001087670.1	-0.719592	4.70921	20.7023	5.36514e-06	0.000123268
GNA15_Ismailoglu201203_XENLA_00004055	-1.61166	1.90153	20.679	5.43073e-06	0.000124638
FOXG1_Taira201203_XENLA_stage_00105996	-2.15989	-0.508043	20.6768	5.43719e-06	0.000124649
EPHA4_XeXenL6RMv10022430m	-0.510892	8.43313	20.614	5.61826e-06	0.000128659
MFGE8_Amin201106_XENLA_00045291	-0.717318	4.49405	20.6078	5.63663e-06	0.000128938
ARHGEF38_Ismailoglu201203_XENLA_00059966	-0.747378	4.77584	20.59	5.68921e-06	0.000129998
ZFYVE1_Taira201203_XENLA_stage_00190519	-0.642265	5.32831	20.4958	5.97612e-06	0.000136405
NELL2_TC413908	-1.27179	2.13172	20.4902	5.99378e-06	0.000136641
NM_001086215.1	-0.81898	5.11892	20.4883	5.99956e-06	0.000136641
FRYL_Taira201203_XENLA_tissue_00178912	-0.958237	3.19725	20.4698	6.05808e-06	0.000137823
LAMC2_Taira201203_XENLA_tissue_00029645	-1.25079	1.65884	20.4478	6.12816e-06	0.000139265
NM_001096277.1	-1.04629	2.56492	20.4354	6.16772e-06	0.000140012
TTLL12_XeXenL6RMv10003984m	-0.732664	4.23872	20.3801	6.34879e-06	0.000143966
KLF13_mgEST_Xl4jul2012_1013102396	0.900468	3.18379	20.33	6.51719e-06	0.000147624
NA_Ismailoglu201203_XENLA_00047141	-0.669422	5.95288	20.3081	6.59202e-06	0.000149157
NA_XeXenL6RMv10048542m	-1.17322	2.63809	20.293	6.64445e-06	0.00015018
MCM6.2_TeperekTkacz201206_XENLA_00023780	0.703895	5.13497	20.2878	6.66225e-06	0.000150412
TAF5L_Taira201203_XENLA_stage_00092094	0.774519	4.07547	20.2859	6.66911e-06	0.000150412
SCPEP1_Park201106_XENLA_00121401	-0.932136	3.62765	20.2651	6.74206e-06	0.000151893
MCC_Taira201203_XENLA_tissue_00038642	-1.57159	0.844888	20.2583	6.76606e-06	0.000152269
ADORA2A_TC419598	-1.36546	1.32099	20.2491	6.79852e-06	0.000152835
IRF9_Taira201203_XENLA_tissue_00013207	-0.8731	3.64701	20.2432	6.81968e-06	0.000153145
NA_Taira201203_XENLA_stage_00000464	-1.11645	2.8081	20.2331	6.8558e-06	0.000153791
AY796189.1	1.10491	2.35897	20.2226	6.8933e-06	0.000154466
NM_001087429.1	0.50876	6.49078	20.199	6.9791e-06	0.000156221
SEMA6D_Kwon201107_XENLA_00014789	0.645473	4.81684	20.1968	6.98713e-06	0.000156233
NM_001086606.1	0.421342	9.02783	20.1044	7.33289e-06	0.000163789
DEPDC1_Quigley201207_XENLA_00007453	-0.510858	6.86126	20.0983	7.35603e-06	0.00016413
CCNE2_XeXenL6RMv10009987m	0.655558	5.9551	20.0865	7.40176e-06	0.000164974
NM_001095076.1	0.699875	5.64036	20.0703	7.46476e-06	0.000166201
NM_001096674.1	-0.73368	4.32197	20.0586	7.51048e-06	0.00016704
RRP12_Kwon201107_XENLA_00086750	-0.448955	8.45669	20.0533	7.53132e-06	0.000167325
ATP1B3_TeperekTkacz201206_XENLA_00036575	-0.506953	6.99058	19.9758	7.84276e-06	0.000174059
HS3ST3A1_TC420639	-0.836735	4.12127	19.964	7.8912e-06	0.000174948
NA_Taira201203_XENLA_tissue_00288866	-0.756698	3.95214	19.9576	7.9179e-06	0.000175354
CCNA2_XeXenL6RMv10036576m	0.422622	8.6151	19.9366	8.0053e-06	0.000177101
CDK5R1_Audic201207_XENLA_00007059	-0.574981	5.67488	19.9303	8.03189e-06	0.000177501
FAM189A2_XeXenL6RMv10043139m	-1.04709	2.33113	19.8566	8.34721e-06	0.000184275
SNED1_Kwon201107_XENLA_00036705	-1.54588	0.756242	19.8192	8.51234e-06	0.000187721
NAALAD2_XeXenL6RMv10010887m	-0.600187	6.67975	19.8147	8.53252e-06	0.000187968
VENTX1.2_mgEST_Xl4jul2012_1013091144	-0.489815	6.58899	19.7875	8.65471e-06	0.000190296
HDAC7_Taira201203_XENLA_stage_00214534	-0.873789	3.43137	19.7868	8.65773e-06	0.000190296
SKP2_Taira201203_XENLA_stage_00139479	0.503668	6.29683	19.7851	8.66558e-06	0.000190296
DPYSL4_Taira201203_XENLA_tissue_00137761	1.39346	1.2508	19.78	8.68893e-06	0.000190608
NM_001090301.1	-1.84447	0.48373	19.7677	8.74492e-06	0.000191635
SERTAD1_Taira201203_XENLA_stage_00047163	-0.676231	4.82424	19.7341	8.8998e-06	0.000194824
NM_001097911.1	-0.817783	4.64828	19.731	8.91445e-06	0.000194941
NM_001093084.1	0.643752	6.6755	19.7252	8.94122e-06	0.000195321
GPANK1_TeperekTkacz201206_XENLA_00112476	-1.49856	0.990692	19.7187	8.97178e-06	0.000195784
BC081096.1	-0.690433	5.84048	19.7094	9.01575e-06	0.000196538
SIRT6_Taira201203_XENLA_stage_00179114	0.538284	5.76703	19.6711	9.19836e-06	0.000200309
SCARB2_Kwon201107_XENLA_00029073	0.880832	3.57821	19.6676	9.21498e-06	0.000200462
SDF2L1_Taira201203_XENLA_tissue_00079401	-0.543395	7.13137	19.6653	9.22599e-06	0.000200492
NKX3-1_XeXenL6RMv10015605m	2.05178	1.05861	19.646	9.32004e-06	0.000202325
MCF2L_Taira201203_XENLA_tissue_00038080	-0.729449	4.21849	19.6439	9.33009e-06	0.000202333
FRYL_XeXenL6RMv10037898m	-1.02198	3.11937	19.5973	9.56021e-06	0.000207108
NA_Quigley201112_XENLA_00072706	-1.89	0.471386	19.5943	9.57531e-06	0.000207171
ANKRD57_Taira201203_XENLA_tissue_00018102	0.584656	5.30892	19.5928	9.58296e-06	0.000207171
AB280760.1	-1.50641	0.88004	19.5634	9.7317e-06	0.00020996
NM_001094903.1	-0.916406	3.1191	19.5633	9.73213e-06	0.00020996
DGKD_Taira201203_XENLA_tissue_00198630	-0.6788	5.80468	19.5431	9.83563e-06	0.000211878
BLVRB_Taira201203_XENLA_tissue_00137182	-1.7744	0.470693	19.541	9.84659e-06	0.000211878
ABLIM1_Taira201203_XENLA_tissue_00043731	-0.580503	5.71632	19.539	9.85671e-06	0.000211878
DMRT2_Taira201203_XENLA_tissue_00041735	-1.24043	2.23028	19.538	9.86164e-06	0.000211878
NA_Taira201203_XENLA_stage_00042062	-0.872714	3.4459	19.5219	9.94534e-06	0.000213457
NM_001127797.1	-1.00922	3.13812	19.5077	1.00196e-05	0.000214829
IRX3_Ismailoglu201203_XENLA_00040848	-0.521038	6.01615	19.5032	1.00431e-05	0.000215113
RGMA_XeXenL6RMv10018767m	0.739748	4.14529	19.4942	1.00907e-05	0.000215911
NM_001093278.1	0.721442	5.48859	19.4759	1.01879e-05	0.000217766
HTRA1_XeXenL6RMv10047297m	1.04808	2.41994	19.4504	1.03248e-05	0.000220276
MET_Taira201203_XENLA_tissue_00068082	1.04251	2.29997	19.4501	1.03264e-05	0.000220276
NM_001093384.1	-1.01733	3.34375	19.445	1.03539e-05	0.000220636
IRAK3_Taira201203_XENLA_tissue_00235574	-2.42294	-0.224563	19.4382	1.03909e-05	0.000221199
NM_001087554.1	-1.51366	0.998969	19.4155	1.05151e-05	0.000223615
C10ORF81_Taira201203_XENLA_tissue_00179798	-0.999837	3.14995	19.4115	1.05372e-05	0.000223857
NM_001085992.1	-0.551018	7.30537	19.4052	1.05717e-05	0.000224361
HIST1H2AA_Ismailoglu201203_XENLA_00022867	0.651744	6.21717	19.3956	1.06251e-05	0.000225265
NM_001090356.1	-0.794482	3.74436	19.3716	1.07593e-05	0.000227878
FASTKD5_Ismailoglu201203_XENLA_00026441	1.00609	2.90565	19.3134	1.10922e-05	0.000234692
NA_Kwon201107_XENLA_00104499	-1.61856	1.14379	19.3092	1.11172e-05	0.000234819
MEF2D_TC416990	-0.771373	4.4229	19.3085	1.11208e-05	0.000234819
NA_Quigley201207_XENLA_00103162	-1.26833	1.49538	19.2894	1.12327e-05	0.000236944
CNFN.1_Park201106_XENLA_00033552	-0.661454	5.80254	19.2843	1.12628e-05	0.000237339
NM_001094011.1	0.45414	8.06087	19.2796	1.12907e-05	0.000237685
TMEM63B_Taira201203_XENLA_tissue_00153776	-0.777828	3.7625	19.2602	1.14057e-05	0.000239696
EFCAB2_Kwon201107_XENLA_00078975	-1.29003	1.44803	19.2597	1.14092e-05	0.000239696
DAD1_TC435518	-0.784677	3.94422	19.2144	1.1683e-05	0.000245203
C16ORF96_Chung201110_XENLA_00004327	-1.74512	0.808916	19.2036	1.1749e-05	0.000246144
TNFRSF11A_Taira201203_XENLA_tissue_00290531	-1.42527	1.72571	19.2032	1.17515e-05	0.000246144
SIK3_Park201106_XENLA_00084429	-0.732546	4.33885	19.2005	1.17684e-05	0.000246251
GRK6_Ismailoglu201203_XENLA_00023287	-0.661055	4.72649	19.1948	1.18034e-05	0.000246737
HOXC3_Taira201203_XENLA_stage_00159449	-2.69218	-0.34242	19.1865	1.1855e-05	0.000247566
DCDC2_Taira201203_XENLA_stage_00113051	-2.45256	-0.578807	19.1792	1.19001e-05	0.00024826
APOBEC2_XeXenL6RMv10043583m	-0.555325	5.65669	19.174	1.19325e-05	0.000248686
M60076.1	-0.559582	7.11103	19.1434	1.21258e-05	0.000252464
ZC3H12A_Taira201203_XENLA_tissue_00077195	-1.9326	0.882045	19.1242	1.22481e-05	0.000254756
CHST1_XeXenL6RMv10043973m	-1.55398	0.888705	19.1164	1.22984e-05	0.000255548
NP_001107550.1_Taira201203_XENLA_tissue_00037322	-1.40877	1.75662	19.1104	1.23369e-05	0.000256091
NM_001091358.1	-0.543276	5.8933	19.0987	1.24129e-05	0.000257414
AMOTL2_XeXenL6RMv10009153m	-0.557844	6.38698	19.0686	1.26103e-05	0.000261247
NP_001072436.1_Quigley201207_XENLA_00006824	-1.9209	0.195206	19.047	1.27541e-05	0.000263965
PHOX2B_XeXenL6RMv10050188m	1.18638	2.37298	19.0226	1.29178e-05	0.000267087
AVPR1B_XeXenL6RMv10005211m	-2.27415	-0.0436077	19.0122	1.29884e-05	0.00026828
BC108553.1	-0.587037	6.88475	19.0071	1.30231e-05	0.000268731
NPAS4_XeXenL6RMv10050824m	-2.24351	-0.581115	18.9888	1.31487e-05	0.000271057
THBS1_XeXenL6RMv10009545m	-2.04494	1.03494	18.968	1.32926e-05	0.000273751
BC041221.1	-0.673068	4.64241	18.9326	1.3542e-05	0.000278612
IRX1_Taira201203_XENLA_stage_00191157	0.536224	5.78913	18.8993	1.37805e-05	0.00028324
RXRA_Taira201203_XENLA_tissue_00188040	-0.955029	2.92124	18.8411	1.42071e-05	0.00029172
CRX_Ismailoglu201203_XENLA_00054319	0.498036	7.83309	18.8385	1.42265e-05	0.000291832
USP43_XeXenL6RMv10047014m	-0.553598	5.9804	18.8184	1.43777e-05	0.000294644
TDH_Taira201203_XENLA_tissue_00058652	2.03648	-0.320606	18.8159	1.43961e-05	0.000294731
CDC6_Ismailoglu201203_XENLA_00014592	0.75942	4.26629	18.8128	1.44194e-05	0.000294919
RNF223_TeperekTkacz201202_XENLA_00134907	-1.32305	2.17389	18.7831	1.46461e-05	0.000299262
NA_Audic201207_XENLA_00001807	-0.776847	3.56655	18.7467	1.49285e-05	0.000304734
NA_Amin201106_XENLA_00063535	-1.56037	0.787736	18.7382	1.49952e-05	0.000305796
GPANK1_Taira201203_XENLA_stage_00003997	-1.06589	1.94885	18.7237	1.51096e-05	0.000307829
LRP10_Kwon201107_XENLA_00125015	-0.620781	4.86525	18.6632	1.55967e-05	0.000317442
NKAIN3_Taira201203_XENLA_stage_00193203	-1.86911	-0.0412352	18.6572	1.56458e-05	0.000317817
FAM163B_Taira201203_XENLA_tissue_00264987	-1.6761	0.916525	18.6562	1.56535e-05	0.000317817
RAB34_Taira201203_XENLA_stage_00017148	-0.568958	6.7203	18.6553	1.56608e-05	0.000317817
B0BMM6_XENTR_Ismailoglu201203_XENLA_00072305	0.395886	8.99629	18.6169	1.59795e-05	0.000323969
NA_Ismailoglu201203_XENLA_00012632	-1.0148	2.47026	18.6094	1.6043e-05	0.000324941
BC072290.1	-1.29747	1.49215	18.5879	1.62248e-05	0.000328305
IMPAD1_Kwon201107_XENLA_00005756	0.696667	4.76171	18.5852	1.62475e-05	0.000328445
KRT18_XeXenL6RMv10015106m	-0.342475	10.027	18.5607	1.64578e-05	0.000331984
AC004017.1_TC447280	0.679938	4.81501	18.5597	1.64668e-05	0.000331984
NM_001094778.1	-0.45801	7.55065	18.5577	1.64839e-05	0.000331984
NA_Taira201203_XENLA_stage_00048712	-0.59547	6.6966	18.5574	1.64862e-05	0.000331984
MCM5_Quigley201207_XENLA_00075980	0.488865	6.25445	18.5503	1.65481e-05	0.000332734
NM_001090271.1	-0.990861	3.57454	18.5494	1.65554e-05	0.000332734
RHBDF1_XeXenL6RMv10012058m	-1.471	0.848732	18.5446	1.65973e-05	0.000333256
NM_001095615.1	0.892235	3.71511	18.4839	1.71348e-05	0.000343463
EPAS1_Taira201203_XENLA_stage_00151684	-0.756436	4.27386	18.4835	1.71386e-05	0.000343463
CT573389.2_TeperekTkacz201202_XENLA_00129053	-0.871761	3.55956	18.4798	1.71713e-05	0.000343789
BMPR2_Taira201203_XENLA_tissue_00128374	-1.05724	1.88763	18.4553	1.73936e-05	0.000347905
CTDSP2_Quigley201207_XENLA_00082721	0.484303	6.81152	18.4507	1.74356e-05	0.000348411
TCF3_Taira201203_XENLA_stage_00133489	-0.462548	7.29427	18.4291	1.76341e-05	0.00035204
FMR1_Quigley201207_XENLA_00119199	-0.563245	5.4223	18.3954	1.79488e-05	0.000357981
XB-GENE-5815363_Taira201203_XENLA_tissue_00119059	-0.840989	3.35501	18.3589	1.82967e-05	0.000364571
BC106392.1	-1.27562	3.34061	18.3503	1.83786e-05	0.000365854
IRAK2_Taira201203_XENLA_tissue_00146767	-0.8558	3.81048	18.342	1.84593e-05	0.00036711
CPD_Quigley201207_XENLA_00069575	0.686677	4.51836	18.332	1.8556e-05	0.000368681
NA_XeXenL6RMv10010032m	0.498227	8.04054	18.3268	1.86075e-05	0.000369353
ANGPT2_XeXenL6RMv10040599m	1.83485	0.232472	18.3237	1.8637e-05	0.000369587
TGFB1_TC416048	-1.66583	1.16962	18.3195	1.86786e-05	0.00037006
AGAP2_XeXenL6RMv10024762m	-1.2948	2.3705	18.287	1.90004e-05	0.000376077
NM_001092278.1	-0.717886	4.4365	18.2809	1.90611e-05	0.000376922
NM_001092754.1	-1.08639	3.29025	18.279	1.90794e-05	0.000376927
NM_001088399.1	0.586341	7.10483	18.2672	1.91981e-05	0.000378913
XB-GENE-5889689_Park201106_XENLA_00073029	-2.1616	-0.443375	18.2222	1.96579e-05	0.000387621
SHRM2_XENTR_Quigley201112_XENLA_00065186	-0.582746	5.63939	18.2114	1.97693e-05	0.000389111
MTMR12_Taira201203_XENLA_tissue_00206183	-0.532666	6.39203	18.2113	1.97707e-05	0.000389111
PLEKHN1_Ismailoglu201203_XENLA_00007733	-0.849853	3.33142	18.1962	1.99278e-05	0.000391694
NM_001086235.1	-1.1178	3.85456	18.1951	1.99396e-05	0.000391694
ADAMTSL5_Taira201203_XENLA_tissue_00075538	-1.61128	1.96788	18.1729	2.01727e-05	0.000395566
LAMP2_TeperekTkacz201206_XENLA_00056079	-0.493658	6.31321	18.1727	2.01746e-05	0.000395566
PDE2A_XeXenL6RMv10036078m	-2.1417	-0.282264	18.1213	2.07272e-05	0.000406019
ARX_XeXenL6RMv10045083m	-2.14106	0.32856	18.1173	2.07705e-05	0.000406486
ARHGEF2_Quigley201207_XENLA_00112023	-0.591978	5.9254	18.104	2.09158e-05	0.000408946
NM_001086198.1	0.73993	5.51258	18.0989	2.09722e-05	0.000409664
NAALAD2_Taira201203_XENLA_stage_00046481	-0.694431	5.27717	18.0885	2.10875e-05	0.000411532
NM_001093617.1	0.58911	5.47603	18.0675	2.13212e-05	0.000415417
DMRTA2_Taira201203_XENLA_stage_00041379	-1.01477	2.53906	18.0658	2.13403e-05	0.000415417
FEM1B_Ismailoglu201203_XENLA_00050711	0.579331	5.41829	18.0652	2.13463e-05	0.000415417
BC166055.1	0.757798	3.87879	18.0538	2.14749e-05	0.000417529
SGSM3_XeXenL6RMv10008864m	-1.09866	3.3549	18.0276	2.17726e-05	0.000422925
RAB11A_Kwon201107_XENLA_00116362	0.619975	4.7728	18.0153	2.1914e-05	0.000425275
NM_001094599.1	-0.450113	7.59455	18.0123	2.19482e-05	0.000425543
ZNF395_Ismailoglu201203_XENLA_00074653	0.528173	6.09853	17.9934	2.21669e-05	0.000429384
HIPK1_Kwon201107_XENLA_00086808	0.535741	5.81473	17.9742	2.2392e-05	0.000433341
CYP2A13_Audic201207_XENLA_00000843	-1.00512	3.62501	17.9598	2.25621e-05	0.000436229
OTOL1_Park201106_XENLA_00111432	-2.76828	-0.518813	17.9406	2.27912e-05	0.00044025
CDCP1_Taira201203_XENLA_stage_00208640	-0.5277	6.2078	17.9345	2.28634e-05	0.000440834
VWC2L.2_Taira201203_XENLA_stage_00203672	1.67755	0.212656	17.9345	2.28637e-05	0.000440834
PRKCA_Park201106_XENLA_00132964	-0.578135	5.64734	17.9051	2.32204e-05	0.000447298
NM_001092224.1	0.615147	5.34445	17.8883	2.34256e-05	0.000450835
WFIKKN1_Taira201203_XENLA_tissue_00090892	-1.57223	0.889772	17.8762	2.35753e-05	0.000453298
NECAB2_Taira201203_XENLA_tissue_00148267	-1.52848	0.473847	17.8654	2.37096e-05	0.000455461
SGPP1_Quigley201112_XENLA_00072477	0.691134	4.69589	17.8633	2.37359e-05	0.000455545
SCYL2_Taira201203_XENLA_stage_00143106	-0.877021	3.86984	17.844	2.39768e-05	0.000459333
C3ORF58_Ismailoglu201203_XENLA_00074382	0.844167	3.30371	17.844	2.39773e-05	0.000459333
NM_001086129.1	-0.45994	7.1945	17.8212	2.42662e-05	0.000464442
RBM7_TeperekTkacz201206_XENLA_00036880	0.465447	7.21718	17.8173	2.43157e-05	0.000464962
KDM5C_Kwon201107_XENLA_00020802	-0.507708	6.18487	17.8141	2.43566e-05	0.000465318
DLGAP4_Taira201203_XENLA_tissue_00269449	-0.934799	2.93219	17.7818	2.47739e-05	0.000472496
NM_001094354.1	-1.02787	2.60583	17.7815	2.47776e-05	0.000472496
NP_001072416.1_Kwon201107_XENLA_00002335	-0.964319	2.67134	17.7796	2.48026e-05	0.000472541
MYO9B_Taira201203_XENLA_tissue_00036102	-0.644051	4.73326	17.7631	2.50189e-05	0.000476226
RECK_Taira201203_XENLA_tissue_00226494	-1.04848	2.08245	17.7377	2.53545e-05	0.000482174
NA_XeXenL6RMv10012284m	-1.82583	-0.0532266	17.7236	2.55438e-05	0.000485332
C10ORF26_Taira201203_XENLA_stage_00054630	-0.993393	2.12173	17.6938	2.59475e-05	0.000492554
NA_Amin201106_XENLA_00001294	-1.99088	-0.132163	17.6871	2.60389e-05	0.00049384
PCDH7_XeXenL6RMv10014053m	0.976492	2.39538	17.684	2.60809e-05	0.000494187
GMNN_Taira201203_XENLA_tissue_00111190	0.872626	3.21447	17.6777	2.6168e-05	0.000495388
BC146637.1	-0.48763	8.70976	17.6668	2.63182e-05	0.000497778
IGSF9_Quigley201112_XENLA_00078927	-1.48105	0.646602	17.6463	2.66034e-05	0.000502718
NM_001096530.1	-0.721076	4.04144	17.6019	2.72321e-05	0.000513742
NM_001092916.1	-0.676984	4.12414	17.6016	2.72361e-05	0.000513742
NM_001091232.1	-0.444512	7.72081	17.5993	2.72695e-05	0.000513909
DLX6_Ismailoglu201203_XENLA_00030441	0.828991	3.08272	17.5784	2.75707e-05	0.000519012
NA_Taira201203_XENLA_stage_00207172	-1.6957	0.353399	17.577	2.75901e-05	0.000519012
NM_001135223.1	-0.560393	5.35077	17.5675	2.77294e-05	0.000521162
ARVCF_Taira201203_XENLA_stage_00069278	0.458164	6.82141	17.5607	2.78278e-05	0.000522396
DNAH8_Quigley201112_XENLA_00057355	-2.07671	-0.573948	17.5595	2.78451e-05	0.000522396
MYCBPAP_Taira201203_XENLA_tissue_00043999	-1.20679	1.61453	17.5446	2.80653e-05	0.000526055
BC086314.1	0.67706	4.75383	17.5289	2.82974e-05	0.000529929
NM_001095460.1	-0.484576	6.13064	17.4807	2.90232e-05	0.000543033
GARNL3_Ismailoglu201203_XENLA_00003080	-1.47472	1.60507	17.4774	2.90742e-05	0.0005435
APLN_TeperekTkacz201206_XENLA_00013087	-0.815616	3.65585	17.4667	2.92392e-05	0.000546095
C13ORF15_Ismailoglu201203_XENLA_00060718	1.39349	1.72613	17.4415	2.96285e-05	0.00055287
BC106325.1	-0.576774	5.01439	17.4262	2.98681e-05	0.000556843
TBX15_XeXenL6RMv10054171m	-1.68351	0.432007	17.4078	3.01592e-05	0.000561573
UCK2_TC419176	0.544388	5.72841	17.4067	3.01756e-05	0.000561573
NP_001107371.1_Kwon201107_XENLA_00101706	0.532869	5.49294	17.3975	3.03226e-05	0.000563805
DHH_Taira201203_XENLA_stage_00014154	-0.724851	4.99749	17.3939	3.03796e-05	0.000564362
LNX1_Taira201203_XENLA_tissue_00035276	-1.53146	0.373846	17.3788	3.06215e-05	0.000568351
TLL1_XeXenL6RMv10007106m	-1.77266	0.312746	17.3436	3.11949e-05	0.000578477
MYCBP_Quigley201207_XENLA_00064347	-0.937529	2.63373	17.296	3.19865e-05	0.000592631
NM_001090342.1	0.521723	6.33517	17.281	3.22389e-05	0.000596777
NM_001090691.1	0.862176	3.12551	17.2777	3.22951e-05	0.000597287
CD40_TC446898	-1.6138	0.347727	17.2702	3.24232e-05	0.000599125
DCK.2_Taira201203_XENLA_tissue_00198050	0.747689	4.32209	17.2019	3.36104e-05	0.000620514
SEMA4G_Taira201203_XENLA_stage_00195549	-0.45905	7.33988	17.1909	3.38049e-05	0.000623127
WDR96_TeperekTkacz201202_XENLA_00047016	-1.2618	2.16044	17.1905	3.38117e-05	0.000623127
NA_Taira201203_XENLA_stage_00038039	-1.80599	0.177573	17.1883	3.38509e-05	0.0006233
NM_001086033.1	-0.701117	3.98135	17.1845	3.39189e-05	0.000623476
CBFB_Kwon201107_XENLA_00119374	0.661051	4.3524	17.1844	3.39203e-05	0.000623476
LETM1_Quigley201207_XENLA_00033684	0.489808	6.54243	17.1815	3.39725e-05	0.000623887
NA_Quigley201207_XENLA_00037867	-1.69439	0.31803	17.1719	3.41448e-05	0.000626498
FREM2_XeXenL6RMv10041098m	-1.63477	0.794352	17.1671	3.42308e-05	0.000627525
SESN2_TeperekTkacz201206_XENLA_00019754	-0.985347	2.05198	17.1495	3.45494e-05	0.000632808
CHN2_XeXenL6RMv10017901m	-1.66988	0.215128	17.1436	3.46583e-05	0.000634247
NM_001092235.1	0.464842	7.29062	17.1367	3.47839e-05	0.000635987
BAALC_Taira201203_XENLA_tissue_00136260	-1.81814	0.470394	17.1192	3.51063e-05	0.000641319
TESK1_Taira201203_XENLA_stage_00066222	-1.03329	2.44647	17.0937	3.55799e-05	0.000649402
MBD5_Taira201203_XENLA_stage_00142778	0.583427	4.97208	17.08	3.58375e-05	0.000653534
BC081018.1	0.756689	4.22848	17.054	3.63323e-05	0.000661977
C1GALT1_Quigley201207_XENLA_00091977	0.717627	4.73734	17.0031	3.73195e-05	0.000679371
BCAR3_Park201106_XENLA_00171986	-2.11613	0.379826	16.9992	3.73956e-05	0.000680164
SLC16A6_Taira201203_XENLA_tissue_00216039	-0.990195	2.51619	16.9905	3.7568e-05	0.000682703
BC073378.1	-0.604547	4.79136	16.9822	3.77311e-05	0.000685071
ENTPD2_XeXenL6RMv10031374m	-0.788496	3.966	16.9628	3.81199e-05	0.000691528
CCDC135_Quigley201112_XENLA_00124219	-1.27832	2.21566	16.9557	3.82632e-05	0.000692932
NEUROG2_Taira201203_XENLA_stage_00013851	2.19447	-0.302033	16.9556	3.82637e-05	0.000692932
TXN2_Quigley201112_XENLA_00105035	-0.818694	4.57794	16.9484	3.84088e-05	0.000694956
LATS2_Ismailoglu201203_XENLA_00052723	0.807671	3.57683	16.9415	3.85489e-05	0.000696887
PPP2R3B_Taira201203_XENLA_tissue_00000677	-0.854808	3.25345	16.9262	3.88618e-05	0.000701936
MARCH8_Taira201203_XENLA_tissue_00292001	-0.818417	3.63225	16.8924	3.95597e-05	0.000713384
DMRTA2_Taira201203_XENLA_tissue_00288329	-1.04138	2.04271	16.8922	3.9564e-05	0.000713384
RP11-766F14.2.1_XeXenL6RMv10007291m	-1.36776	1.01874	16.8733	3.99591e-05	0.000719886
BC073343.1	-1.2427	1.8763	16.8661	4.01107e-05	0.000721993
EPS8L3_mgEST_Xl4jul2012_1013114833	-1.51905	1.20079	16.8632	4.01735e-05	0.0007225
BC079830.1	-0.887272	2.76301	16.8584	4.02742e-05	0.000723688
GADD45GIP1_Kwon201107_XENLA_00039806	0.553702	5.28224	16.8548	4.03504e-05	0.000724432
TP73_Taira201203_XENLA_tissue_00209174	-2.09206	-0.723301	16.8433	4.05972e-05	0.000728236
NM_001090189.1	-0.867851	3.35369	16.8353	4.07689e-05	0.000730538
GDAP1_Taira201203_XENLA_tissue_00268205	-1.3433	0.980185	16.834	4.07955e-05	0.000730538
NM_001092501.1	-0.729117	3.65116	16.8228	4.10365e-05	0.000733793
ZC3H12C_XeXenL6RMv10043125m	1.43974	1.24291	16.8223	4.10477e-05	0.000733793
ATAD5_Taira201203_XENLA_tissue_00133240	0.51725	5.77524	16.8116	4.128e-05	0.000737315
PDE8B_Quigley201112_XENLA_00019269	-1.80063	0.0448467	16.8032	4.14641e-05	0.00073997
NM_001094148.1	-0.836457	3.00602	16.7995	4.15449e-05	0.000740777
ZNF365_Taira201203_XENLA_tissue_00238745	-0.455473	7.28036	16.7946	4.16525e-05	0.000741805
SSH2_TeperekTkacz201202_XENLA_00050812	-0.700275	3.95633	16.7936	4.16736e-05	0.000741805
EF120478.2	-0.547863	5.38498	16.7614	4.23871e-05	0.000753736
NM_001095397.1	-2.54886	-1.1437	16.7601	4.24162e-05	0.000753736
NM_001086237.1	-0.73983	5.79472	16.7566	4.24931e-05	0.00075446
VENTX3.2_Ismailoglu201203_XENLA_00041489	-0.572402	5.32028	16.7227	4.326e-05	0.000767424
LYPD6_Taira201203_XENLA_stage_00152177	1.02625	2.4879	16.709	4.35748e-05	0.000772351
PLSCR1_Ismailoglu201203_XENLA_00028545	0.420425	8.13418	16.5978	4.62043e-05	0.000818264
SCN5A_Horb201201_XENLA_00080597	-1.9945	0.253894	16.5946	4.62831e-05	0.000818964
CDCA7_Taira201203_XENLA_stage_00211711	0.621794	4.81496	16.5904	4.63848e-05	0.000820068
NA_Taira201203_XENLA_tissue_00287806	-2.41551	-0.541473	16.5875	4.6456e-05	0.000820632
NA_Taira201203_XENLA_stage_00200750	0.684123	4.67189	16.5829	4.65699e-05	0.000821661
NM_001089222.1	-0.590883	4.71347	16.5819	4.65931e-05	0.000821661
NM_001087746.1	-0.463934	6.8665	16.5694	4.69007e-05	0.000826387
TTC24_Taira201203_XENLA_stage_00049672	-1.63117	0.661494	16.5655	4.69988e-05	0.000827417
NM_001088572.1	0.550594	5.75152	16.5622	4.70804e-05	0.000828155
BC169775.1	-0.467173	7.62235	16.5448	4.75135e-05	0.000835068
S1PR3_XeXenL6RMv10007839m	1.54424	0.584635	16.5359	4.77382e-05	0.000838311
NM_001095101.1	1.39791	1.11447	16.5312	4.78571e-05	0.000839693
PRDM1_TeperekTkacz201206_XENLA_00074690	0.505004	6.54662	16.5214	4.81044e-05	0.000843322
T2_Ismailoglu201203_XENLA_00023316	-0.432309	7.70223	16.5149	4.82699e-05	0.000845513
NM_001086108.1	-0.538868	5.34473	16.5123	4.83345e-05	0.000845934
TMEFF1_XeXenL6RMv10034310m	-0.870656	3.19802	16.5064	4.84861e-05	0.000847877
NM_001088337.1	0.731821	4.23548	16.4936	4.88157e-05	0.000852665
GLA_Ismailoglu201203_XENLA_00062117	-0.551745	5.32253	16.4925	4.88417e-05	0.000852665
P4HA2_Ismailoglu201203_XENLA_00015998	-0.567981	5.58654	16.4803	4.91574e-05	0.00085746
LFNG_Audic201207_XENLA_00002214	0.731591	4.076	16.4595	4.97011e-05	0.000866219
NM_001096770.1	-0.989393	3.78349	16.4508	4.99291e-05	0.000869467
LENG8_Taira201203_XENLA_tissue_00035420	-0.492412	7.28654	16.4453	5.00733e-05	0.000871251
KIAA0247_TeperekTkacz201206_XENLA_00116800	-0.478881	6.40464	16.4436	5.01183e-05	0.000871306
NET1_Taira201203_XENLA_stage_00187313	-0.537335	5.89656	16.4281	5.05309e-05	0.000877538
SBNO2_Taira201203_XENLA_tissue_00167592	-0.505507	5.75088	16.427	5.05608e-05	0.000877538
BC129634.1	0.746872	3.58007	16.4071	5.10948e-05	0.000885506
WDR38_Quigley201112_XENLA_00105752	-1.58573	0.418385	16.4067	5.11048e-05	0.000885506
PHLPP1_Taira201203_XENLA_tissue_00041512	0.546518	5.30491	16.3902	5.15516e-05	0.000892506
FBXW7_Taira201203_XENLA_stage_00036083	-0.882298	3.30571	16.3751	5.19645e-05	0.000898908
PCDH19_Taira201203_XENLA_tissue_00195057	-0.728994	4.04666	16.361	5.23509e-05	0.000904843
DENND3_Taira201203_XENLA_tissue_00196114	0.864829	3.94824	16.345	5.27966e-05	0.00091179
H1F0_TC441782	1.09172	2.19464	16.342	5.28777e-05	0.000912436
KIAA0232_Quigley201207_XENLA_00094729	-0.663212	4.36188	16.3342	5.30961e-05	0.000915446
ACSL3_XeXenL6RMv10022446m	0.58426	4.71385	16.3229	5.34156e-05	0.000920196
BC092332.1	-1.00387	2.77488	16.3034	5.39679e-05	0.000928942
CSNK1E_XeXenL6RMv10038787m	-0.526384	5.48411	16.2959	5.41813e-05	0.000931847
ATP1A1_Ismailoglu201203_XENLA_00051285	-0.333083	10.4199	16.2922	5.42869e-05	0.000932893
NA_Taira201203_XENLA_tissue_00239342	-0.818333	4.04611	16.2707	5.49058e-05	0.000942753
U65897.1	0.620718	5.79976	16.2603	5.52076e-05	0.000947156
WASF2_TeperekTkacz201206_XENLA_00052446	-0.361039	8.93917	16.2162	5.65099e-05	0.000968701
CABIN1_Ismailoglu201203_XENLA_00059530	-0.510212	5.62741	16.1972	5.70793e-05	0.000977658
FGD3_Taira201203_XENLA_tissue_00057341	-1.22886	2.10234	16.1943	5.71664e-05	0.000978348
ATP11C_Taira201203_XENLA_tissue_00051932	-0.813653	3.94142	16.1915	5.72507e-05	0.000978986
CLDN11_Ismailoglu201203_XENLA_00021368	1.19621	2.14134	16.1758	5.77256e-05	0.000986299
FGD1_Quigley201112_XENLA_00014140	-1.06888	1.84295	16.1688	5.79414e-05	0.000989176
GCH1_Taira201203_XENLA_tissue_00127764	-0.978719	3.33323	16.1534	5.84131e-05	0.000996414
CLCN5_Taira201203_XENLA_stage_00035730	-0.618594	4.9972	16.1374	5.89106e-05	0.00100408
DNALI1_Audic201207_XENLA_00002207	-0.572075	4.73243	16.132	5.90761e-05	0.00100608
GNMT_Taira201203_XENLA_tissue_00221284	-1.01642	1.79758	16.1186	5.94959e-05	0.0010124
USP37_Park201106_XENLA_00035322	0.65227	4.15174	16.1153	5.96006e-05	0.00101336
NM_001096421.1	-1.52662	1.7353	16.088	6.04658e-05	0.00102723
LRRC34_TC421126	-1.71729	0.145669	16.0841	6.05913e-05	0.00102803
NM_001095525.1	1.18009	3.05212	16.0824	6.0644e-05	0.00102803
DOCK9_Taira201203_XENLA_tissue_00239069	-0.656036	5.03121	16.0819	6.06608e-05	0.00102803
PMEPA1_Park201106_XENLA_00154644	-0.686946	3.95974	16.0681	6.1105e-05	0.00103472
AF393655.1	-0.580475	6.28086	16.0621	6.12992e-05	0.00103711
NRL_Ismailoglu201203_XENLA_00040182	-2.05755	-0.382636	16.0606	6.13457e-05	0.00103711
NP_001027511.1_Taira201203_XENLA_stage_00021510	-1.05908	1.62164	16.0587	6.14095e-05	0.00103735
NA_Ismailoglu201203_XENLA_00015244	-0.761765	3.36744	16.047	6.17901e-05	0.00104293
CAMK2N2_TC454157	-1.86786	0.267968	16.0341	6.22119e-05	0.0010492
JMJD1C_Taira201203_XENLA_tissue_00008806	-0.593705	4.69686	16.0178	6.27484e-05	0.0010574
NM_001172212.1	-0.606285	5.5749	16.0161	6.28045e-05	0.00105749
C5ORF42_Quigley201207_XENLA_00110848	-0.744871	3.7376	16.0125	6.29256e-05	0.00105867
MMRN2_Kwon201107_XENLA_00011088	-1.19588	1.38397	15.9992	6.337e-05	0.00106529
NUP153_Taira201203_XENLA_stage_00209240	0.439076	7.30264	15.9686	6.44024e-05	0.00108177
FRAS1_Taira201203_XENLA_tissue_00291265	-0.902057	2.79688	15.9622	6.46207e-05	0.00108457
PCDHA13_Quigley201207_XENLA_00054861	0.690799	3.8922	15.9556	6.48468e-05	0.00108749
KIAA0232_XeXenL6RMv10021417m	-0.596886	4.73174	15.9419	6.53175e-05	0.0010945
APCDD1_Taira201203_XENLA_stage_00202221	-0.638999	4.3659	15.9058	6.65758e-05	0.00111469
BC108779.1	0.567124	4.95895	15.8859	6.72775e-05	0.00112554
NA_Taira201203_XENLA_tissue_00096808	-1.87086	0.225272	15.8819	6.74197e-05	0.00112701
ZBTB47_Taira201203_XENLA_tissue_00037084	-0.523103	5.76481	15.8666	6.7966e-05	0.00113523
ITM2A_XeXenL6RMv10006075m	-0.464494	6.27399	15.8628	6.81056e-05	0.00113665
ADAM7_Taira201203_XENLA_tissue_00171040	1.092	1.85713	15.8597	6.82157e-05	0.00113758
NM_001086189.1	-0.438853	6.86747	15.8525	6.84756e-05	0.00114101
NM_001088152.1	0.715722	3.93871	15.8433	6.88083e-05	0.00114563
NM_001087181.1	1.30032	1.28256	15.8388	6.89743e-05	0.00114748
LENG8_Taira201203_XENLA_stage_00130770	-0.51966	7.06276	15.8314	6.92443e-05	0.00115106
CCDC39_Taira201203_XENLA_tissue_00074120	-0.796245	3.31839	15.8084	7.00902e-05	0.00116419
Q0V9S5_XENTR_XeXenL6RMv10049465m	-1.37228	0.951496	15.7905	7.0757e-05	0.00117415
NA_Quigley201207_XENLA_00046661	-1.81594	-0.294193	15.7893	7.08022e-05	0.00117415
NM_001090018.1	-0.607362	4.58135	15.7849	7.0966e-05	0.00117593
TNRC18_Taira201203_XENLA_tissue_00104384	-0.883945	2.6952	15.7772	7.12553e-05	0.00117978
BC170378.1	0.540128	5.86152	15.7325	7.29616e-05	0.00120708
AGMO_Ismailoglu201203_XENLA_00024260	-0.965461	2.15776	15.7289	7.30984e-05	0.00120838
PTS_XeXenL6RMv10028786m	-1.70175	0.223576	15.7246	7.3267e-05	0.00121021
NM_001086796.1	0.462764	6.22783	15.7151	7.36327e-05	0.00121529
RGS14_TC414082	-1.07173	1.94075	15.7131	7.37108e-05	0.00121562
SSBP3_Kwon201107_XENLA_00020070	0.383905	8.34671	15.7011	7.41827e-05	0.00122243
CHGB_XeXenL6RMv10024773m	-1.17134	1.68338	15.6924	7.45235e-05	0.00122708
FER1L4_Horb201201_XENLA_00118498	-1.19737	2.08322	15.688	7.4697e-05	0.00122897
MED4_Taira201203_XENLA_tissue_00001047	0.682564	4.31264	15.683	7.48946e-05	0.00123125
NM_001094713.1	-1.32184	1.2733	15.6745	7.52309e-05	0.0012358
NM_001087059.1	-0.49328	7.01666	15.6549	7.60142e-05	0.00124768
EPN3_Taira201203_XENLA_tissue_00006351	-0.832525	3.35675	15.6422	7.6527e-05	0.00125511
AJ009279.1	0.441864	6.4508	15.6393	7.66445e-05	0.00125572
ZC3H4_Kwon201107_XENLA_00046823	-0.743755	3.61806	15.6383	7.66842e-05	0.00125572
CD99_Taira201203_XENLA_stage_00076255	-0.39922	7.84922	15.6025	7.81504e-05	0.00127872
PHKG2_XeXenL6RMv10024553m	0.714399	3.89229	15.5865	7.88144e-05	0.00128858
RGMA_TeperekTkacz201206_XENLA_00019990	0.548754	5.91015	15.548	8.04368e-05	0.00131407
RSPH6A_Chung201110_XENLA_00046712	-0.582996	4.66168	15.5455	8.05432e-05	0.00131478
TNFSF10_Taira201203_XENLA_tissue_00189281	-0.942809	2.42437	15.5424	8.06748e-05	0.0013159
COL5A3_XeXenL6RMv10022142m	-2.02886	-0.413086	15.5345	8.10128e-05	0.00132038
NA_Kwon201107_XENLA_00013580	-0.337701	9.68073	15.5285	8.1269e-05	0.00132352
F6UT48_XENTR_Taira201203_XENLA_tissue_00145599	-0.80947	3.54755	15.5267	8.13473e-05	0.00132377
AMBRA1_Taira201203_XENLA_stage_00016319	0.560346	4.75123	15.5199	8.1643e-05	0.00132754
ARHGAP27_Taira201203_XENLA_tissue_00015001	-0.802098	3.47647	15.5055	8.22676e-05	0.00133666
FGD5_Taira201203_XENLA_tissue_00277788	-1.8567	0.156937	15.5007	8.24768e-05	0.00133901
ZNF217_Taira201203_XENLA_stage_00066772	-0.51358	7.67785	15.4962	8.26715e-05	0.00134113
NM_001095284.1	-1.05408	1.9838	15.4867	8.30885e-05	0.00134685
E1BXE8_CHICK_Taira201203_XENLA_tissue_00025206	-1.33962	0.690852	15.4679	8.39187e-05	0.00135925
TMEM119_Taira201203_XENLA_stage_00171015	1.33048	1.50009	15.4652	8.40388e-05	0.00136014
NM_001090550.1	-0.941395	2.15527	15.4416	8.50965e-05	0.00137619
CHD7_TC454280	0.467099	6.53532	15.436	8.53491e-05	0.00137877
VANGL1_Taira201203_XENLA_tissue_00058232	-0.748047	3.81136	15.4351	8.53884e-05	0.00137877
DQ096858.1	0.461069	6.07216	15.4164	8.62388e-05	0.00139143
NM_001086119.1	-2.42666	-0.358923	15.4011	8.6936e-05	0.00140159
AY757358.1	1.02942	2.9166	15.3808	8.78782e-05	0.00141569
NM_001094110.1	0.519427	5.64735	15.3768	8.80625e-05	0.00141684
BC170176.1	-2.04032	-0.584774	15.3763	8.80857e-05	0.00141684
PARP3_Taira201203_XENLA_tissue_00036963	-1.48402	0.604605	15.3535	8.91572e-05	0.00143285
STARD13_Quigley201207_XENLA_00053948	0.531103	5.90344	15.3522	8.92184e-05	0.00143285
DNAH6_Taira201203_XENLA_tissue_00233098	-1.40318	0.525135	15.3434	8.9635e-05	0.00143809
GLI3_TC413489	0.714835	4.47757	15.3424	8.96822e-05	0.00143809
DNAJB11_Kwon201107_XENLA_00044163	-0.511225	5.80072	15.3348	9.00414e-05	0.00144274
PARD6G_Ismailoglu201203_XENLA_00032340	0.590293	5.22135	15.3046	9.14918e-05	0.00146485
TRIM36_Kwon201107_XENLA_00011813	0.664724	3.8626	15.2796	9.27147e-05	0.00148329
PLIN2_Taira201203_XENLA_tissue_00128088	-0.983908	1.74692	15.269	9.32318e-05	0.00149042
GALNT10_Taira201203_XENLA_stage_00128146	0.451497	6.23532	15.2252	9.54193e-05	0.00152422
ENC1_Kwon201107_XENLA_00080116	-0.896019	2.78001	15.2136	9.60072e-05	0.00153244
B0JYW4_XENTR_Ismailoglu201203_XENLA_00030582	-0.416758	7.28696	15.2087	9.62605e-05	0.00153531
NM_001086349.1	-1.45194	1.37908	15.1993	9.67386e-05	0.00154176
ANKRD37_Taira201203_XENLA_stage_00132389	1.03743	1.92161	15.1973	9.68426e-05	0.00154224
BC049390.1	0.537713	7.07152	15.1918	9.71254e-05	0.00154556
C6ORF165_Quigley201207_XENLA_00073406	-1.02678	2.14324	15.1769	9.78933e-05	0.00155659
PTPRA_TC414856	0.630056	4.43755	15.1547	9.90494e-05	0.00157378
FREM2_Taira201203_XENLA_tissue_00015602	-1.23101	1.11001	15.1459	9.95165e-05	0.00157999
ALDH4A1_Quigley201207_XENLA_00103820	0.503975	5.43628	15.1355	0.000100066	0.00158751
ZMYND8_Kwon201107_XENLA_00059029	-1.01311	2.75574	15.1333	0.000100179	0.0015881
CPEB2_Taira201203_XENLA_tissue_00001146	-0.536601	4.98611	15.1129	0.000101268	0.00160415
SFRP1_Taira201203_XENLA_tissue_00209861	1.19528	1.78767	15.1081	0.000101529	0.00160705
FADS2_XeXenL6RMv10052580m	-1.66127	0.110269	15.1035	0.000101777	0.00160976
FGF16_Taira201203_XENLA_tissue_00055335	-0.623776	4.48245	15.1014	0.00010189	0.00160999
NM_001091097.1	-0.582466	5.14787	15.1003	0.000101946	0.00160999
NA_Audic201207_XENLA_00007146	-0.610506	4.29796	15.0873	0.000102653	0.00161992
NM_001091444.1	0.660735	5.16947	15.0856	0.000102746	0.00162018
PTPRB_Taira201203_XENLA_tissue_00206779	-1.41406	0.767754	15.082	0.000102942	0.00162204
SYN1_Quigley201207_XENLA_00041060	0.907468	2.65756	15.0721	0.000103482	0.00162932
FOXJ1_Chung201110_XENLA_00073874	-0.595672	6.10642	15.053	0.000104532	0.00164461
FZD5_Ismailoglu201203_XENLA_00002341	-0.877669	2.63143	14.9909	0.000108032	0.00169839
NA_Ismailoglu201203_XENLA_00031090	0.54045	5.30854	14.9883	0.000108178	0.00169941
AJ009291.1	-0.617113	5.11373	14.9836	0.000108452	0.00170211
LNX1_Taira201203_XENLA_tissue_00271151	-1.82087	-0.326158	14.9809	0.000108606	0.00170211
NA_XeXenL6RMv10036561m	-1.79813	0.057647	14.9797	0.000108673	0.00170211
GLRX5_XeXenL6RMv10032918m	0.500993	5.54297	14.9789	0.00010872	0.00170211
NA_TC426513	0.984536	2.11444	14.9782	0.000108758	0.00170211
SLC26A9_Taira201203_XENLA_tissue_00253215	-1.0428	1.87569	14.9728	0.000109072	0.00170575
RREB1_Ismailoglu201203_XENLA_00055191	-0.439253	7.86692	14.9569	0.000109994	0.00171887
CORO1A_XeXenL6RMv10041673m	-2.34215	-0.950012	14.9448	0.000110703	0.00172865
NM_001095873.1	-1.8601	-0.339403	14.9307	0.00011153	0.00174028
CFP_Amin201106_XENLA_00097696	1.00398	2.57239	14.9289	0.000111641	0.0017407
ALG14_Quigley201207_XENLA_00053143	-1.21234	1.06495	14.9066	0.000112965	0.00176003
PPRC1_Taira201203_XENLA_stage_00088231	0.663759	5.40757	14.898	0.000113486	0.00176682
NM_001090073.1	-1.19023	1.13998	14.881	0.000114513	0.00178148
MAP3K8_Taira201203_XENLA_tissue_00062227	0.795926	2.8817	14.8764	0.00011479	0.00178446
PCDH8L_Taira201203_XENLA_stage_00137150	0.94703	3.08075	14.8717	0.000115076	0.00178758
B3GNT9_Taira201203_XENLA_tissue_00292762	-3.41081	-0.265521	14.8662	0.000115411	0.00178945
BC072106.1	0.490393	7.28423	14.8658	0.000115437	0.00178945
FASTKD1_Ismailoglu201203_XENLA_00043279	0.994436	2.40992	14.8655	0.000115454	0.00178945
STAT2_Taira201203_XENLA_tissue_00233462	-0.736824	3.34566	14.8638	0.000115558	0.00178974
FAT1_XeXenL6RMv10049988m	-0.799306	3.07609	14.8593	0.000115836	0.0017927
TLE1_Quigley201207_XENLA_00036174	0.450234	6.03818	14.854	0.00011616	0.00179638
CDO1_TeperekTkacz201206_XENLA_00040703	0.524158	7.10295	14.8517	0.000116304	0.00179728
ATRN_TeperekTkacz201202_XENLA_00110870	-1.1057	1.35048	14.8057	0.000119175	0.00184029
WDR86_XeXenL6RMv10011833m	-2.13751	0.197844	14.8026	0.00011937	0.00184193
PRKAA1_TC427237	0.550947	5.18177	14.7796	0.000120837	0.0018632
PSMA1_Ismailoglu201203_XENLA_00060592	0.546257	4.966	14.7778	0.000120952	0.00186359
MAP2K1_Park201106_XENLA_00025637	-0.367816	8.43604	14.7711	0.000121379	0.0018688
NA_Quigley201207_XENLA_00070182	-0.696776	3.57419	14.7671	0.000121642	0.00187072
LRRC3B_Taira201203_XENLA_tissue_00170371	-1.62455	-0.00817089	14.7664	0.000121684	0.00187072
ATRN_Park201106_XENLA_00120008	-0.856529	2.88101	14.7517	0.000122635	0.00188395
BC130115.1	0.527533	5.12435	14.7431	0.000123199	0.00189123
PLEKHG3_Ismailoglu201203_XENLA_00043656	-0.549412	7.50839	14.7353	0.000123709	0.00189766
WDR90_Taira201203_XENLA_tissue_00253405	0.675492	4.09173	14.7318	0.000123937	0.00189976
NA_Amin201106_XENLA_00034869	-1.16286	1.74592	14.7205	0.000124684	0.00190981
TRIL_Taira201203_XENLA_stage_00073019	-1.09441	2.3848	14.708	0.000125512	0.00192107
LASP1_XeXenL6RMv10046448m	-0.528675	5.27907	14.7062	0.000125629	0.00192147
HAS2_Ismailoglu201203_XENLA_00004296	0.469836	5.84907	14.6634	0.000128516	0.00196418
NA_Kwon201107_XENLA_00087893	0.469511	5.71254	14.6577	0.000128908	0.00196872
ATP1B1_Park201106_XENLA_00031877	-0.839315	3.20339	14.6447	0.000129799	0.00198088
VPS37B_TC416176	0.4474	6.90586	14.6189	0.000131588	0.00200671
GLB1L2_Quigley201207_XENLA_00117517	-1.05858	3.27944	14.6144	0.000131905	0.00201008
KDM5C_TeperekTkacz201206_XENLA_00006051	-0.436142	7.50127	14.5972	0.000133115	0.00202704
GATA2_TC436966	0.597257	4.96572	14.577	0.000134548	0.00204737
NP_001120166.1_Taira201203_XENLA_tissue_00249709	-1.89718	-0.534946	14.5754	0.000134661	0.00204759
FAM154B_Chung201110_XENLA_00066068	-0.909265	2.1384	14.5683	0.000135168	0.0020538
GAST_TeperekTkacz201206_XENLA_00029174	-2.19769	-0.380975	14.5605	0.000135729	0.00206082
PLEKHA2_TC427696	-2.35775	0.365925	14.548	0.000136635	0.00207308
TIAM1_Taira201203_XENLA_stage_00198736	-0.443382	6.74942	14.5084	0.000139535	0.00211553
SLC25A34_XeXenL6RMv10021835m	0.640624	4.16716	14.504	0.000139864	0.00211898
NM_001085980.1	0.450349	6.11971	14.4926	0.000140712	0.00213029
NM_001127768.1	-1.0384	1.71813	14.4871	0.00014112	0.00213491
GRIP1_Ismailoglu201203_XENLA_00001832	-1.31846	1.08351	14.4727	0.000142202	0.00214824
FAM83F_Quigley201207_XENLA_00049711	-0.779296	3.71019	14.4727	0.000142207	0.00214824
ESR-5_Taira201203_XENLA_tissue_00272077	-0.542981	5.3735	14.4618	0.000143029	0.0021591
SLC35D3_XeXenL6RMv10050043m	-1.90418	-0.494991	14.4475	0.000144118	0.00217396
NM_001088985.1	-0.738351	3.31845	14.4419	0.000144554	0.00217896
AKNA_Taira201203_XENLA_tissue_00087627	-1.66722	0.326374	14.4359	0.000145008	0.00218424
BC099261.1	0.460656	5.83994	14.4295	0.000145503	0.00219011
JMJD1C_XeXenL6RMv10055243m	-0.751316	3.3548	14.4159	0.000146559	0.00220441
ANXA7_Ismailoglu201203_XENLA_00069573	-0.365087	8.55705	14.4097	0.000147046	0.00221014
BCL9_Ismailoglu201203_XENLA_00045496	0.419015	7.60254	14.3993	0.00014786	0.00222078
NA_XeXenL6RMv10054416m	-1.10001	1.28253	14.3798	0.000149399	0.00224228
IQSEC3_XeXenL6RMv10049433m	1.25015	0.90614	14.3674	0.000150381	0.00225539
NM_001089667.1	-0.399823	8.08344	14.3555	0.000151339	0.00226635
SPRY4_Taira201203_XENLA_tissue_00000609	-0.557441	4.69514	14.3551	0.000151368	0.00226635
MAPK6_Amin201106_XENLA_00049286	0.455171	6.33424	14.3542	0.000151438	0.00226635
NM_001089893.1	1.01744	2.04952	14.3322	0.000153219	0.00229137
ZHX3_Taira201203_XENLA_stage_00000595	0.971512	1.71379	14.3145	0.000154672	0.00231105
NM_001087056.1	-0.362961	10.5651	14.3134	0.000154757	0.00231105
NM_001091267.1	-0.293371	11.0561	14.3109	0.000154961	0.00231245
CLCF1_Ismailoglu201203_XENLA_00028516	-0.723099	3.75517	14.3039	0.000155542	0.00231946
RMI2_Taira201203_XENLA_stage_00082008	-0.531118	4.96984	14.3019	0.000155708	0.00232027
KLHL15_Ismailoglu201203_XENLA_00068192	0.664719	4.19987	14.2972	0.000156095	0.00232325
LRRN1_Quigley201207_XENLA_00097977	0.533758	6.02102	14.2968	0.00015613	0.00232325
BC072868.1	0.664602	3.96416	14.2898	0.000156715	0.00233029
SLC39A14_Taira201203_XENLA_tissue_00151836	-1.08446	3.04492	14.2738	0.000158048	0.00234844
RNF219_Taira201203_XENLA_stage_00052836	0.610785	4.29698	14.2682	0.000158521	0.00235378
BC078015.1	-0.57766	5.16452	14.2549	0.000159642	0.00236874
EXOSC6_TeperekTkacz201202_XENLA_00120996	0.468175	5.74861	14.2441	0.000160563	0.00238071
FRMD4B_Taira201203_XENLA_tissue_00146409	-0.77665	3.31015	14.2402	0.000160899	0.00238401
NA_TC431680	-0.450904	7.38021	14.2337	0.000161452	0.0023905
NAV2_Taira201203_XENLA_tissue_00189484	-0.561254	5.75343	14.2208	0.000162563	0.00240469
SMARCA5_XeXenL6RMv10008724m	0.863757	2.66241	14.2199	0.000162641	0.00240469
SLC9A4_TeperekTkacz201202_XENLA_00048466	-1.23747	2.22324	14.2063	0.000163818	0.00242037
ANO9_Quigley201112_XENLA_00037981	-0.605619	5.74466	14.2029	0.000164114	0.00242304
LTBP4_Amin201106_XENLA_00023858	-1.43968	0.40974	14.1989	0.000164469	0.00242656
SH2D5_XeXenL6RMv10054295m	-1.40561	0.494611	14.1872	0.000165495	0.00243997
UBP1_Taira201203_XENLA_tissue_00085494	-1.25827	0.835491	14.1592	0.000167974	0.00247478
GEMIN4_Quigley201207_XENLA_00043324	0.673517	3.82997	14.1501	0.000168791	0.00248506
LIN28B_TeperekTkacz201206_XENLA_00005047	0.675014	3.86187	14.1326	0.000170365	0.00250646
TJAP1_XeXenL6RMv10034454m	0.565446	4.72221	14.1298	0.000170618	0.00250841
BC041186.1	0.823248	3.06956	14.1237	0.000171176	0.00251485
COBLL1_Kwon201107_XENLA_00074861	-0.913037	2.01344	14.1201	0.000171506	0.00251791
NM_001094734.1	0.470634	6.007	14.1165	0.000171829	0.00252084
SLC12A2_Quigley201207_XENLA_00020738	0.450652	5.96133	14.1152	0.000171947	0.00252084
UNC13D_XeXenL6RMv10043817m	-2.26345	0.309026	14.1056	0.000172829	0.00253199
NM_001091603.1	-0.956874	2.39279	14.0934	0.00017395	0.00254662
BC160736.1	1.52254	0.0802348	14.0771	0.000175467	0.00256704
MYO10.2_TeperekTkacz201202_XENLA_00039192	-0.565652	5.1305	14.0727	0.000175881	0.00257129
CDC25C_Ismailoglu201203_XENLA_00044266	-0.785327	2.81043	14.0555	0.000177496	0.00259308
NM_001087933.1	-0.612656	4.25277	14.0487	0.000178136	0.00260061
RBM27_TeperekTkacz201202_XENLA_00015883	0.458856	6.88119	14.0414	0.000178831	0.00260893
U44049.1	0.756733	3.16409	14.0375	0.0001792	0.00261249
BC157494.1	-0.505057	5.74785	14.0235	0.000180544	0.00263024
LAMB3_Taira201203_XENLA_tissue_00080099	-0.813622	3.08838	14.0131	0.000181541	0.00264292
NM_001097702.1	0.976424	2.65902	14.0026	0.000182555	0.00265583
GRASP_Ismailoglu201203_XENLA_00016663	-0.556202	4.8744	13.9999	0.00018282	0.00265783
BC074310.1	0.614794	4.41066	13.9951	0.000183284	0.00266272
C6ORF62_XeXenL6RMv10003531m	0.520294	5.63529	13.9918	0.000183613	0.00266565
WDR96_XeXenL6RMv10054461m	-1.02773	2.63882	13.9888	0.000183899	0.00266795
OPTN_Kwon201107_XENLA_00016546	1.00403	3.3781	13.9872	0.000184062	0.00266845
NM_001093832.1	1.93086	0.48177	13.9739	0.000185365	0.00268548
NA_XeXenL6RMv10022803m	-1.85254	-0.0869113	13.9654	0.000186208	0.00269582
MCM6.2_XeXenL6RMv10032544m	0.479403	5.55906	13.9628	0.000186468	0.00269771
ZNF217_Ismailoglu201203_XENLA_00052660	-0.545069	5.13677	13.9492	0.000187817	0.00271534
NM_001091259.1	0.452174	5.9815	13.9424	0.000188501	0.00272335
CEBPG_TC418024	0.777961	3.49296	13.9407	0.000188672	0.00272393
PDK4_TC415272	-0.412041	7.25355	13.9087	0.000191913	0.00276881
CRHR1.1_Taira201203_XENLA_tissue_00171260	2.19496	-0.940134	13.906	0.000192188	0.00277086
NM_001086219.1	1.00536	2.86413	13.8949	0.000193321	0.00278526
NM_001094750.1	-1.00728	2.93947	13.8606	0.000196882	0.00283366
NM_001094479.1	0.548218	4.90869	13.8599	0.000196952	0.00283366
TSPAN15_Kwon201107_XENLA_00028745	-0.9051	2.82427	13.8499	0.000198007	0.00284688
LIMA1_Taira201203_XENLA_tissue_00105923	-0.51638	5.28332	13.8312	0.000199993	0.00287345
PHLDB1_Ismailoglu201203_XENLA_00039150	-0.506732	5.58969	13.8096	0.000202296	0.00290454
NM_001095513.1	-0.627792	4.02075	13.7812	0.000205381	0.00294681
FSD1L_Taira201203_XENLA_tissue_00028458	0.803963	2.86148	13.7721	0.000206375	0.00295715
NM_001096471.1	-0.513331	5.19013	13.772	0.000206385	0.00295715
BCAP31_Taira201203_XENLA_stage_00114523	-0.776001	2.99076	13.7692	0.000206695	0.00295889
NA_Taira201203_XENLA_tissue_00205666	-0.977847	1.8154	13.7674	0.0002069	0.00295889
NENF_Amin201106_XENLA_00062286	0.920038	2.10807	13.7671	0.000206932	0.00295889
BC073334.1	-0.384111	7.65121	13.7471	0.000209144	0.00298847
OXR1_XENTR_TC414275	-0.571922	5.16745	13.7455	0.00020932	0.00298893
KIFC3_Ismailoglu201203_XENLA_00057636	-0.478955	6.00598	13.741	0.000209821	0.00299404
KIAA1456_XeXenL6RMv10044569m	0.685	3.46071	13.7138	0.000212882	0.00303565
HAP1_Taira201203_XENLA_tissue_00240791	-0.474269	6.42867	13.7125	0.000213035	0.00303575
NM_001089872.1	-1.94153	-0.236224	13.6932	0.000215233	0.00306498
MBOAT1_Taira201203_XENLA_tissue_00209414	-1.16917	1.56381	13.6913	0.000215445	0.0030659
FZD2_Taira201203_XENLA_stage_00107362	0.685364	3.50528	13.6841	0.000216281	0.0030757
CDK2_XeXenL6RMv10044052m	0.499175	5.47763	13.6818	0.000216544	0.00307734
REPS2_Quigley201112_XENLA_00037939	-0.965473	2.85247	13.6587	0.000219222	0.00311329
FER1L4_XeXenL6RMv10002241m	-0.721394	3.81298	13.6563	0.000219509	0.00311524
NM_001088727.1	-0.746025	3.45933	13.6522	0.000219987	0.00311846
UPK2_Taira201203_XENLA_stage_00212986	-0.52042	6.4033	13.6518	0.000220035	0.00311846
FRZB_Ismailoglu201203_XENLA_00033617	-0.472663	5.7663	13.6465	0.000220656	0.00312514
BRD2_Ismailoglu201203_XENLA_00069249	-0.381868	8.14916	13.6283	0.000222803	0.00315189
FAM83C_TeperekTkacz201206_XENLA_00117535	-0.568153	4.73976	13.6279	0.000222847	0.00315189
UBR5_XeXenL6RMv10010008m	-0.367612	8.09686	13.6112	0.000224838	0.00317789
CISH_Taira201203_XENLA_tissue_00172578	-0.932016	3.61222	13.594	0.000226912	0.00320504
NA_XeXenL6RMv10034392m	-1.15947	1.17888	13.5906	0.000227323	0.00320867
ZBTB11_XeXenL6RMv10007405m	1.82915	-0.635055	13.5757	0.000229128	0.00323196
NA_Park201106_XENLA_00049422	-1.68366	0.00272758	13.5532	0.000231902	0.00326887
NA_XeXenL6RMv10020974m	-1.03114	1.99533	13.5514	0.000232124	0.00326979
BAZ1B_Taira201203_XENLA_stage_00126340	0.434216	6.62695	13.545	0.000232905	0.00327859
BC161684.1	-0.541041	5.03995	13.5404	0.000233478	0.00328444
STT3B_Quigley201112_XENLA_00081140	-0.591104	4.89536	13.536	0.000234036	0.00329006
USP53_Ismailoglu201203_XENLA_00054411	0.566261	5.30674	13.5331	0.000234398	0.00329294
MAGI1_Ismailoglu201203_XENLA_00003337	0.663687	4.79964	13.5144	0.000236736	0.00332355
BC089275.1	-0.663945	3.66678	13.4993	0.000238656	0.00334756
AUTS2_Taira201203_XENLA_tissue_00148963	-0.480154	5.86855	13.4984	0.000238767	0.00334756
BC094209.1	0.525603	5.28346	13.4896	0.000239884	0.00336096
FAM13A_Taira201203_XENLA_tissue_00150631	-1.06039	2.79771	13.4869	0.000240231	0.00336355
NM_001087438.1	0.483586	5.38863	13.4822	0.000240833	0.00336813
FAM46A_Quigley201207_XENLA_00002344	-0.668272	3.79423	13.4819	0.00024088	0.00336813
NM_001095786.1	-0.574973	4.72561	13.4806	0.000241048	0.00336821
C10ORF88_Taira201203_XENLA_tissue_00098874	0.655481	4.1388	13.4693	0.000242504	0.00338557
NM_001086376.1	-1.20781	2.48186	13.4684	0.00024262	0.00338557
NM_001091590.1	-0.478972	6.18901	13.4672	0.000242777	0.00338557
NM_001093441.1	0.514887	4.90217	13.4591	0.000243825	0.00339792
BC073689.1	-0.60738	4.08196	13.4477	0.000245311	0.00341544
NM_001086476.1	-1.18216	1.68838	13.4469	0.00024541	0.00341544
ATRN_TeperekTkacz201206_XENLA_00088271	-0.866764	2.64156	13.4446	0.000245717	0.00341744
NA_Taira201203_XENLA_stage_00029115	0.572535	5.93072	13.4413	0.000246147	0.00341887
XB-GENE-5805799_Ismailoglu201203_XENLA_00037319	0.467592	6.15663	13.4413	0.000246148	0.00341887
NM_001095553.1	-1.30421	1.47016	13.4393	0.000246405	0.00342016
ACER1_Taira201203_XENLA_tissue_00221017	-1.03072	1.64729	13.434	0.0002471	0.00342752
SNED1_Kwon201107_XENLA_00071515	-1.40493	0.707303	13.4317	0.000247404	0.00342946
CD99L2_Taira201203_XENLA_tissue_00200688	-0.643119	4.447	13.42	0.000248957	0.00344812
KCNB2_Taira201203_XENLA_tissue_00088023	-1.72855	0.170086	13.419	0.000249084	0.00344812
NDRG4_Kwon201107_XENLA_00125654	-0.843606	2.31345	13.4178	0.000249245	0.00344812
STON2_Taira201203_XENLA_stage_00141681	-0.549519	4.64636	13.415	0.000249623	0.00345105
BC097812.1	-0.514879	4.98392	13.4029	0.000251238	0.00347108
MDK_Taira201203_XENLA_stage_00206604	-0.817899	2.70489	13.3938	0.000252464	0.0034857
KCP_Taira201203_XENLA_tissue_00271249	-1.13611	3.03356	13.367	0.000256086	0.00353337
PDE7A_TeperekTkacz201206_XENLA_00048489	0.591692	4.30688	13.3587	0.000257223	0.00354672
AL929195.1_TC456522	-1.13688	1.33821	13.3365	0.000260291	0.00358488
BC078022.1	0.455454	6.21158	13.3362	0.000260334	0.00358488
GAS6_XeXenL6RMv10046723m	0.621881	3.93505	13.3314	0.000260994	0.00359159
RALGAPA1_XeXenL6RMv10041375m	-0.794863	3.37123	13.3273	0.000261576	0.00359572
EXOC3L2_Horb201201_XENLA_00221600	-1.54671	0.828913	13.3268	0.000261638	0.00359572
NA_XeXenL6RMv10053156m	-0.911228	2.02889	13.3232	0.000262146	0.00360032
NP_001107371.1_Chung201110_XENLA_00030720	0.411661	6.4381	13.3022	0.000265092	0.00363839
CDKL4_Park201106_XENLA_00027967	-1.18939	0.869972	13.2993	0.000265506	0.00364167
NA_XeXenL6RMv10021838m	0.985179	1.82837	13.2829	0.000267831	0.00367115
MSX1_TeperekTkacz201206_XENLA_00125235	0.449241	5.92405	13.2734	0.000269201	0.00368751
NM_001090067.1	0.708648	4.14741	13.2665	0.00027019	0.00369863
USPL1_Taira201203_XENLA_stage_00048456	0.691233	3.9486	13.2606	0.000271044	0.00370789
BC108473.1	0.702903	3.97223	13.2424	0.000273681	0.00374151
PLEKHG4_Taira201203_XENLA_stage_00112026	0.511377	5.4717	13.2366	0.00027453	0.00375066
SEMA3F_TeperekTkacz201202_XENLA_00112779	-0.464262	6.04476	13.2199	0.000276986	0.00378173
RAB11B.1_XeXenL6RMv10047220m	-0.378367	7.53645	13.2161	0.000277547	0.00378692
SLA2_Taira201203_XENLA_tissue_00095932	-1.07317	1.20595	13.2022	0.000279616	0.00381203
UPK2_Kwon201107_XENLA_00045414	0.359055	8.96806	13.2013	0.000279753	0.00381203
KCNQ4_Taira201203_XENLA_tissue_00156868	-1.59045	0.0682805	13.1876	0.00028181	0.00383755
NM_001096127.1	-0.445132	6.27037	13.1824	0.000282596	0.00384575
LAMC1_XeXenL6RMv10020579m	-0.393084	7.55375	13.1677	0.000284821	0.00387349
ST6GAL2_XeXenL6RMv10030154m	-1.65619	-0.030795	13.164	0.000285374	0.00387796
NA_XeXenL6RMv10054440m	-0.552706	4.61028	13.1631	0.000285521	0.00387796
FABP3_Taira201203_XENLA_tissue_00077104	-1.05391	1.43024	13.157	0.000286441	0.00388791
FHDC1_XeXenL6RMv10015926m	-0.713839	3.15078	13.1558	0.000286631	0.00388797
LHX1_XeXenL6RMv10029814m	-0.436356	6.52807	13.1425	0.000288674	0.00391314
DHX16_Ismailoglu201203_XENLA_00010708	0.464292	5.37093	13.1218	0.000291885	0.00395209
NM_001088162.1	-0.381588	7.95754	13.1215	0.000291926	0.00395209
RHBDF2_Quigley201112_XENLA_00136006	-0.629321	4.00951	13.1072	0.000294161	0.00397975
TMEM238_Taira201203_XENLA_tissue_00047788	-0.75938	3.16887	13.1012	0.000295104	0.00398993
PDE5A_Taira201203_XENLA_tissue_00007725	-1.21856	1.06234	13.0948	0.000296114	0.00400099
PMEL_Kwon201107_XENLA_00000161	-0.395958	7.67849	13.0901	0.000296865	0.00400854
MXI1_TeperekTkacz201202_XENLA_00012864	-0.397362	8.05602	13.0827	0.000298033	0.00402171
LETM2_Kwon201107_XENLA_00084761	0.652648	4.48002	13.0661	0.000300687	0.0040549
KIAA1429_Ismailoglu201203_XENLA_00022648	0.396459	6.84544	13.0407	0.000304787	0.00410533
NM_001085958.1	-0.481766	5.24215	13.0402	0.000304877	0.00410533
NM_001096779.1	-0.413827	6.48463	13.0393	0.000305017	0.00410533
NM_001093047.1	-0.852806	2.5819	13.033	0.000306048	0.00411655
PARP1_Quigley201207_XENLA_00041886	0.417543	7.81602	13.0287	0.000306753	0.00412338
NES_XeXenL6RMv10038244m	0.729669	3.05529	13.0217	0.000307903	0.00413617
HUNK_Taira201203_XENLA_tissue_00225069	0.471814	5.41848	13.019	0.000308345	0.00413944
HPS1_Audic201207_XENLA_00004653	0.701954	4.2175	13.0176	0.000308585	0.00414
NP_001076825.1_Taira201203_XENLA_tissue_00146118	-0.900066	3.55445	13.0071	0.000310319	0.00416059
WDR43_Audic201207_XENLA_00006136	0.403881	6.39471	13.0034	0.000310919	0.00416367
TAF5L_Kwon201107_XENLA_00015825	0.571311	4.31466	13.003	0.000310994	0.00416367
NM_001091085.1	-0.663912	5.35142	13.0014	0.000311264	0.00416367
TRIL_Taira201203_XENLA_stage_00129591	-0.700603	3.95231	13.0009	0.000311347	0.00416367
ASPG_Taira201203_XENLA_stage_00151345	0.437959	6.17007	12.9918	0.000312856	0.00418117
CHN1_Amin201106_XENLA_00076850	-0.836659	3.72212	12.9773	0.000315297	0.00420994
KIF11_XeXenL6RMv10028561m	-0.503813	5.63373	12.9766	0.000315413	0.00420994
NA_XeXenL6RMv10015172m	-0.778273	3.60042	12.9639	0.000317551	0.00423577
HNRNPR_TeperekTkacz201206_XENLA_00012434	0.371791	7.73935	12.9607	0.000318096	0.00424034
NM_001092860.1	0.697824	3.48223	12.9565	0.000318814	0.00424719
NM_001086596.1	0.285292	10.4034	12.955	0.000319073	0.00424793
CCDC158_Kwon201107_XENLA_00069282	0.725656	3.39645	12.9516	0.000319653	0.00425286
ZC3H18_Kwon201107_XENLA_00047819	0.414047	7.22924	12.9504	0.000319851	0.00425286
BC046952.1	1.27185	0.857725	12.9432	0.000321091	0.00426663
UBXN2A_TeperekTkacz201206_XENLA_00061112	0.420076	6.07435	12.9387	0.000321851	0.00427399
OTX2_XeXenL6RMv10009265m	0.620627	3.97235	12.9361	0.000322303	0.00427399
NA_TeperekTkacz201202_XENLA_00096729	-0.833944	2.78006	12.9352	0.000322459	0.00427399
TUFT1_Taira201203_XENLA_tissue_00185896	-1.13478	1.78035	12.9352	0.000322465	0.00427399
C10ORF28_Taira201203_XENLA_tissue_00112515	-0.476684	5.19655	12.9331	0.000322827	0.00427608
XRCC5_XeXenL6RMv10043953m	-0.663488	3.50462	12.9318	0.000323052	0.00427634
SH3BP4_TC414427	-0.390432	7.67376	12.9206	0.000324978	0.0042991
BASP1_Taira201203_XENLA_tissue_00155122	1.93672	2.06767	12.9185	0.000325356	0.00430138
STMN1_XeXenL6RMv10014772m	0.49886	5.04656	12.9161	0.000325776	0.00430194
B0JZZ7_XENTR_TeperekTkacz201206_XENLA_00107489	0.512224	5.18785	12.9159	0.000325811	0.00430194
CDKNX_XeXenL6RMv10048126m	0.410047	6.31756	12.9087	0.000327061	0.00431572
ZNF319_TeperekTkacz201206_XENLA_00077695	-0.433821	6.02536	12.9058	0.00032757	0.00431711
ACOT8_Taira201203_XENLA_tissue_00054054	-1.16295	0.794921	12.9057	0.00032758	0.00431711
LRBA_TeperekTkacz201206_XENLA_00097642	-1.36258	0.353949	12.8932	0.000329775	0.00434328
NP_001096230.1_Taira201203_XENLA_tissue_00244574	-1.38047	0.273305	12.8666	0.000334499	0.00440273
LOC728026_Quigley201112_XENLA_00028742	0.319366	10.4118	12.8654	0.000334712	0.00440275
BC047971.1	-1.2875	0.613665	12.849	0.000337656	0.00443868
BC080324.1	0.52632	5.21652	12.8414	0.000339036	0.00445401
NM_001127766.1	-1.66396	0.35277	12.8281	0.000341455	0.00448296
ANKRD13C_XeXenL6RMv10003397m	0.613429	4.51455	12.8246	0.000342094	0.00448493
CDX4_Horb201201_XENLA_00139468	-0.571003	5.38637	12.8238	0.000342231	0.00448493
ABT1_Taira201203_XENLA_tissue_00090061	0.416799	6.07888	12.8237	0.00034225	0.00448493
SPRY4_XeXenL6RMv10030390m	-0.907492	2.55831	12.8079	0.000345164	0.00452029
CHD7_XeXenL6RMv10055135m	0.451814	6.29525	12.7976	0.00034706	0.00454226
BC098954.1	-0.768408	2.81866	12.7933	0.000347862	0.0045499
SEMA4G_Taira201203_XENLA_tissue_00251754	-1.07362	1.33862	12.7733	0.000351596	0.00459586
DNAH5_Taira201203_XENLA_tissue_00062233	-1.03823	1.26163	12.7714	0.000351962	0.00459776
GSS_Taira201203_XENLA_tissue_00280150	-0.818624	3.57096	12.7691	0.000352385	0.00460041
PPA2_XeXenL6RMv10012874m	-0.54382	4.49038	12.7535	0.000355348	0.00463492
MKKS_XeXenL6RMv10055386m	0.728154	3.06003	12.7528	0.000355473	0.00463492
FAM214A_Taira201203_XENLA_tissue_00137842	-1.21278	1.05262	12.7427	0.000357409	0.00465726
BC082432.1	-0.445642	6.12612	12.733	0.000359255	0.00467839
NA_Ismailoglu201203_XENLA_00015402	0.514403	5.03749	12.7307	0.000359709	0.00468138
SLC30A10_Taira201203_XENLA_tissue_00269763	-0.683976	4.68972	12.7291	0.000360011	0.00468239
AGRN_Taira201203_XENLA_stage_00135882	-1.60864	-0.22779	12.7171	0.000362322	0.00470951
MTMR4_XeXenL6RMv10026449m	0.57949	4.18495	12.7085	0.000364005	0.00472844
L29057.1	-0.411627	8.06802	12.7	0.000365647	0.00474681
BC127426.1	0.521157	5.12367	12.6911	0.000367407	0.00476669
HAS-RS_TeperekTkacz201202_XENLA_00083067	0.256275	11.4655	12.6861	0.000368391	0.00477649
TP53INP1_TeperekTkacz201206_XENLA_00049613	-0.631129	3.74432	12.6806	0.00036947	0.0047875
WNT5B_Audic201207_XENLA_00005441	-0.433809	6.40881	12.6774	0.000370111	0.00479283
C9ORF172_Taira201203_XENLA_tissue_00152750	-0.95682	1.80268	12.6714	0.000371295	0.00480518
QSOX2_Ismailoglu201203_XENLA_00032463	0.465322	5.27334	12.658	0.000373969	0.00483678
DDR2_Taira201203_XENLA_stage_00200722	-0.541366	5.06976	12.6548	0.000374604	0.004842
NM_001177440.1	-0.690259	3.47286	12.6531	0.000374951	0.00484312
COL4A5_XeXenL6RMv10010244m	-1.02119	1.29925	12.652	0.000375155	0.00484312
NM_001092922.1	-1.37843	0.511666	12.6463	0.000376314	0.00485489
POPDC2_Taira201203_XENLA_tissue_00128214	-0.953617	2.20861	12.6452	0.000376532	0.00485489
NM_001088172.1	0.929214	2.15182	12.6176	0.000382137	0.00492411
SIDT2_Taira201203_XENLA_stage_00206651	-0.49991	5.4644	12.6126	0.000383161	0.00493394
LRRC56_Quigley201207_XENLA_00107613	-0.660832	5.61085	12.6115	0.000383372	0.00493394
PPP4R2_Kwon201107_XENLA_00136610	0.405976	6.22499	12.6081	0.000384081	0.00494001
ESRRG_Quigley201207_XENLA_00057176	-1.09632	1.45034	12.5964	0.000386484	0.00496786
MCM4_Ismailoglu201203_XENLA_00043671	0.75781	3.10347	12.5943	0.000386926	0.00496889
CCNDX_Taira201203_XENLA_stage_00138680	-1.09477	1.4312	12.5937	0.000387041	0.00496889
NM_001094609.1	0.515058	4.7539	12.5752	0.000390909	0.00501546
GPX1_Taira201203_XENLA_tissue_00160287	-0.721774	2.94317	12.572	0.000391562	0.00502076
MKNK2_TC413660	-0.369803	7.68178	12.5699	0.000392	0.00502328
SUDS3_Taira201203_XENLA_stage_00079295	0.850547	2.84654	12.5536	0.000395437	0.00506143
BC077402.1	0.37383	8.26893	12.553	0.000395565	0.00506143
NM_001088604.1	0.339758	8.49304	12.5524	0.000395705	0.00506143
NA_Ismailoglu201203_XENLA_00045177	-0.791868	2.86687	12.5508	0.000396043	0.00506266
DARMIN_TeperekTkacz201206_XENLA_00081109	-0.429649	6.51729	12.5451	0.000397249	0.00507255
NM_001089764.1	-0.591816	4.28965	12.5437	0.00039754	0.00507255
GLIS3_TeperekTkacz201206_XENLA_00030850	-0.892445	3.03692	12.5437	0.000397547	0.00507255
ERI1_Ismailoglu201203_XENLA_00066168	0.492402	5.4202	12.5401	0.000398321	0.00507932
MAFB_Taira201203_XENLA_tissue_00222808	-1.1545	4.69765	12.5284	0.000400811	0.00510795
PTS_Quigley201207_XENLA_00031350	-1.12247	0.924171	12.5212	0.000402371	0.0051247
SOS2_TeperekTkacz201206_XENLA_00116975	-0.735821	2.88573	12.518	0.000403058	0.00513032
NM_001088706.1	1.8346	0.159037	12.5151	0.000403674	0.00513503
NA_Taira201203_XENLA_stage_00064295	-0.531173	4.95875	12.5083	0.000405139	0.00515053
TAF3_TeperekTkacz201206_XENLA_00007190	0.401017	6.2124	12.5068	0.00040548	0.00515172
OSBPL2_Horb201201_XENLA_00194443	-1.4211	0.338913	12.5048	0.000405918	0.00515415
TESK1_Quigley201112_XENLA_00082549	-0.800567	2.78765	12.4999	0.00040697	0.00516436
P4HA2_XeXenL6RMv10013830m	-0.95487	1.7407	12.4942	0.000408219	0.00517452
NA_Taira201203_XENLA_tissue_00075852	-0.580078	4.35716	12.494	0.000408267	0.00517452
CDKN2AIP_Taira201203_XENLA_tissue_00251040	0.480746	5.30192	12.4899	0.000409167	0.00518278
NA_TC435501	-0.721822	3.96446	12.484	0.000410452	0.0051959
CHAF1A_Taira201203_XENLA_tissue_00040952	0.464853	6.06609	12.4777	0.00041184	0.00521031
HS3ST1_Taira201203_XENLA_stage_00203768	1.16275	1.01606	12.4755	0.000412316	0.00521317
SLC25A22_Taira201203_XENLA_tissue_00182759	-0.78482	2.57705	12.4734	0.000412781	0.00521589
SESN3_TeperekTkacz201206_XENLA_00046107	-0.587399	3.94727	12.4711	0.000413308	0.00521938
AGRP_XeXenL6RMv10043301m	-1.89293	-0.220525	12.461	0.000415533	0.00524432
ARL6IP1_Taira201203_XENLA_tissue_00255859	-0.882162	2.13988	12.459	0.000415977	0.00524674
NM_001093904.1	0.525137	4.74712	12.4546	0.000416963	0.00525601
NM_001090797.1	-0.844957	2.57288	12.4345	0.000421477	0.00530969
NA_Taira201203_XENLA_stage_00151924	-1.22639	0.531702	12.4332	0.000421764	0.0053101
FST_TC424338	-0.761813	2.97418	12.4249	0.000423649	0.00533062
LAMA3_Taira201203_XENLA_tissue_00232181	-1.17011	2.06613	12.406	0.000427965	0.0053787
C9ORF172_XeXenL6RMv10029615m	-1.74981	0.0398214	12.4059	0.000427986	0.0053787
FAM55C_Taira201203_XENLA_tissue_00286244	-1.03238	1.52726	12.3925	0.000431063	0.00541411
BC130067.1	0.737858	3.71687	12.382	0.000433492	0.00544134
RAVER2_Taira201203_XENLA_tissue_00013035	0.520268	4.54113	12.3779	0.000434439	0.00544996
AF220426.1	0.472854	6.76694	12.366	0.000437217	0.0054815
NM_001090344.1	-0.439459	6.34499	12.3598	0.000438679	0.00549138
NM_001089709.1	0.46119	5.57766	12.3588	0.000438912	0.00549138
NM_001087255.1	0.33603	8.67912	12.3583	0.000439022	0.00549138
BX000999.6_TeperekTkacz201206_XENLA_00040478	-0.417589	7.98389	12.3582	0.000439058	0.00549138
BC106400.1	0.929459	1.80558	12.3484	0.000441369	0.00551698
CHD7_Taira201203_XENLA_stage_00058983	0.436287	5.85862	12.3398	0.000443392	0.00553894
SH2D5_Park201106_XENLA_00010202	-0.947652	1.65051	12.3178	0.000448652	0.0056013
PIK3CG_XeXenL6RMv10022272m	-1.87246	-0.0820494	12.3152	0.000449282	0.00560581
RAB11FIP4_Taira201203_XENLA_tissue_00231469	-1.17747	0.972154	12.3123	0.00044998	0.00561117
MRC2_XeXenL6RMv10011556m	-1.46388	0.329022	12.3006	0.000452822	0.00564323
ADARB1_Ismailoglu201203_XENLA_00032226	0.570994	4.54371	12.2989	0.000453237	0.00564503
NA_Taira201203_XENLA_tissue_00076498	-0.859022	2.47938	12.2965	0.000453801	0.00564869
GRHL1_Quigley201207_XENLA_00040360	0.401669	6.28572	12.2913	0.000455073	0.00566114
BMP7.1_XeXenL6RMv10005646m	-0.650682	3.59961	12.2895	0.000455505	0.00566314
PA2G4_XeXenL6RMv10039895m	0.448706	5.41791	12.2864	0.000456281	0.00566941
SLC6A16_Taira201203_XENLA_stage_00160707	-0.945159	2.77284	12.2835	0.000456992	0.00567487
MKRN3_Ismailoglu201203_XENLA_00063812	0.447404	6.97534	12.2764	0.000458723	0.00569239
BC108446.1	0.833805	2.37182	12.2755	0.000458949	0.00569239
WDR89_Taira201203_XENLA_stage_00217115	0.624033	4.07316	12.2608	0.000462573	0.00573393
ODC1_XeXenL6RMv10053554m	0.300838	10.2918	12.257	0.000463525	0.00574232
GLI1.1_Taira201203_XENLA_stage_00150788	-0.670213	3.67351	12.2542	0.000464212	0.00574741
NM_001088110.1	0.40289	7.09313	12.2375	0.000468388	0.00579568
NM_001094292.1	0.569071	4.64201	12.2032	0.000477088	0.00589768
CLINT1_Taira201203_XENLA_tissue_00188030	0.676665	3.61937	12.2027	0.000477197	0.00589768
SZT2_TeperekTkacz201202_XENLA_00062065	-1.01798	1.67046	12.1833	0.000482181	0.00595528
USP37_Taira201203_XENLA_stage_00211887	0.527749	4.7817	12.1824	0.000482428	0.00595528
LZTS2_Taira201203_XENLA_stage_00211305	-0.531805	5.13223	12.1741	0.000484565	0.00597812
NA_XeXenL6RMv10044680m	-1.71953	-0.254696	12.1718	0.000485174	0.00598209
FOXJ1_Taira201203_XENLA_stage_00143582	-0.551637	5.40094	12.1657	0.000486769	0.00599822
NA_XeXenL6RMv10023702m	1.28927	0.951842	12.1574	0.000488947	0.0060215
PHLDA2_Ismailoglu201203_XENLA_00001795	-1.03928	1.42403	12.1363	0.000494489	0.00608615
CKAP4_Ismailoglu201203_XENLA_00020307	-0.426806	7.41549	12.1339	0.000495142	0.0060906
DOPEY2_Quigley201112_XENLA_00123576	-0.556174	4.4901	12.1311	0.000495867	0.00609592
BC042314.1	0.631831	3.72605	12.1287	0.000496508	0.0061002
ROBO3_Taira201203_XENLA_tissue_00093443	0.717665	3.97117	12.1266	0.000497073	0.00610355
BC046688.1	-0.796086	3.96203	12.1183	0.000499298	0.00612727
NA_Ismailoglu201203_XENLA_00004822	-0.421946	7.57024	12.1105	0.000501399	0.00614943
BC044003.1	0.457066	5.42959	12.1012	0.000503889	0.00617634
NM_001086667.1	-1.04129	2.53608	12.0998	0.000504269	0.00617737
DHX9_Ismailoglu201203_XENLA_00028078	-0.353168	8.30123	12.0971	0.000505002	0.00618271
ADAMTS3_XeXenL6RMv10050724m	-1.42759	0.244069	12.0957	0.000505376	0.00618367
BC085228.1	-0.704478	3.083	12.0809	0.000509422	0.00622952
CDC14A_Taira201203_XENLA_stage_00147231	-0.605573	3.95054	12.076	0.000510755	0.00624216
NA_Quigley201207_XENLA_00030663	-1.26428	0.605941	12.0508	0.00051771	0.00632346
2310033E01RIK_Taira201203_XENLA_tissue_00122414	-2.20637	0.849887	12.0473	0.000518676	0.00633155
F7CFV6_XENTR_Horb201201_XENLA_00013998	0.507034	5.02325	12.0358	0.000521874	0.00636687
BC080125.1	2.83409	-0.921592	12.033	0.000522673	0.00637289
FGD1_Taira201203_XENLA_tissue_00028879	-0.732784	3.15334	12.0213	0.000525956	0.00640916
ANKAR_Taira201203_XENLA_tissue_00014833	-1.28006	0.785712	12.0198	0.000526383	0.00641062
NM_001090059.1	-0.504072	5.20512	12.0115	0.00052874	0.00643491
NA_Horb201201_XENLA_00010666	-0.622777	3.98535	12.0106	0.000528994	0.00643491
AY371498.1	-0.782485	2.55847	11.9951	0.000533411	0.00648487
USPL1_Ismailoglu201203_XENLA_00068688	0.777781	2.54388	11.9904	0.000534757	0.00649744
NM_001088651.1	0.686523	3.09109	11.9783	0.00053823	0.00653583
ARHGAP5_Taira201203_XENLA_stage_00054002	-0.431444	7.53839	11.9576	0.00054426	0.00660358
NM_001096175.1	0.468991	5.27555	11.9569	0.000544442	0.00660358
NA_XeXenL6RMv10005013m	-0.918221	2.16903	11.9523	0.000545787	0.00661604
C10ORF140_Taira201203_XENLA_stage_00100761	0.717372	3.11402	11.9497	0.000546556	0.00661859
PRDX1_Audic201207_XENLA_00005829	0.949181	1.36859	11.9495	0.000546632	0.00661859
NOTUM_Taira201203_XENLA_stage_00135205	0.474668	5.15144	11.9368	0.000550372	0.00666002
POU2F3_Chung201110_XENLA_00008330	1.19094	1.14792	11.9309	0.000552092	0.00667695
NM_001093333.1	-0.737276	3.03412	11.9192	0.000555594	0.00671541
NM_001086227.1	0.367572	7.72827	11.9021	0.000560696	0.00677315
POST_XeXenL6RMv10008609m	-0.520755	7.91688	11.8945	0.000563006	0.00679713
TCF19_Kwon201107_XENLA_00008171	0.765197	3.3239	11.8922	0.000563681	0.00680134
SLC26A6_Ismailoglu201203_XENLA_00047300	0.500567	5.32415	11.8786	0.000567823	0.00684736
NA_Taira201203_XENLA_stage_00038823	-0.480072	6.18433	11.8759	0.000568662	0.00685351
GPR110_Quigley201207_XENLA_00116845	-0.797686	2.99916	11.8705	0.000570315	0.00686946
MID1_Ismailoglu201203_XENLA_00059773	-0.566576	4.54534	11.8577	0.000574239	0.00691052
PLVAP_Park201106_XENLA_00092758	-1.14553	1.13436	11.8572	0.000574386	0.00691052
BC073487.1	0.38931	7.21341	11.8484	0.000577123	0.00693944
ACSF2_Taira201203_XENLA_tissue_00170686	2.93234	2.6726	11.8395	0.000579877	0.00696577
PSEN1_TC416461	-0.495009	5.45741	11.8384	0.000580229	0.00696577
BTG5_TC416839	-0.579283	3.93437	11.8381	0.000580314	0.00696577
NM_001087839.1	0.57447	5.21035	11.836	0.00058095	0.0069694
MYH6_TC451771	0.879892	1.70706	11.8127	0.000588283	0.00705331
NM_001093262.1	0.508617	4.98262	11.8098	0.000589184	0.00706006
CITED4_XeXenL6RMv10024805m	0.690097	3.01978	11.8078	0.00058984	0.00706323
NM_001093397.1	-0.955252	1.75269	11.8069	0.000590126	0.00706323
TPX2_XeXenL6RMv10004825m	-0.33658	8.87901	11.802	0.000591682	0.00707747
DNAH6_Quigley201112_XENLA_00066607	-1.78782	-0.414595	11.801	0.000591994	0.00707747
NM_001096211.1	-1.52615	-0.173932	11.7948	0.000593961	0.00709623
NA_Kwon201107_XENLA_00081813	-0.858775	1.79366	11.7939	0.000594244	0.00709623
NA_Taira201203_XENLA_tissue_00182581	-1.49477	0.706134	11.7789	0.000599073	0.00714981
LONP1_Ismailoglu201203_XENLA_00038181	0.653964	3.62374	11.7696	0.000602045	0.00718117
SLC12A6_Taira201203_XENLA_stage_00001456	-0.760695	2.58875	11.7645	0.000603702	0.00719682
HERC6_XeXenL6RMv10023206m	-1.01003	1.51346	11.7554	0.000606656	0.00722791
HIP1_XeXenL6RMv10018240m	-1.33659	0.293571	11.7504	0.000608295	0.00724329
LRP10_Ismailoglu201203_XENLA_00047768	-0.6823	3.28286	11.7491	0.000608731	0.00724435
MYO5C_Quigley201112_XENLA_00109763	-0.753863	3.00768	11.7428	0.000610788	0.00726469
NM_001094470.1	-0.405635	6.94945	11.7344	0.000613565	0.00728669
GDPD2_Chung201110_XENLA_00035441	-0.670375	3.9794	11.7339	0.000613721	0.00728669
NM_001094745.1	-0.828986	2.48133	11.7333	0.00061393	0.00728669
NA_XeXenL6RMv10020279m	0.669625	3.22856	11.7317	0.000614444	0.00728669
GPRC5B_TeperekTkacz201202_XENLA_00003773	-0.653795	4.94825	11.731	0.000614671	0.00728669
CHSY1_Chung201110_XENLA_00043123	-0.49145	5.23266	11.7308	0.000614734	0.00728669
WDR93_Taira201203_XENLA_tissue_00102555	-0.90362	1.60808	11.7263	0.000616242	0.00730042
CDAN1_Park201106_XENLA_00078268	0.852634	1.98957	11.7188	0.000618722	0.00732564
NM_001086903.1	-0.407545	6.98238	11.7107	0.000621409	0.00735328
SEMA6D_Taira201203_XENLA_tissue_00257890	0.451649	5.24389	11.7026	0.000624113	0.00738015
EFHC1_Taira201203_XENLA_tissue_00201917	-0.71803	3.48342	11.7018	0.000624387	0.00738015
DNM1_Taira201203_XENLA_tissue_00044171	-1.47269	-0.234513	11.6904	0.00062822	0.00742125
NM_001086527.1	-1.40941	0.393982	11.688	0.000629055	0.00742363
BC059962.1	0.458859	5.21676	11.6877	0.000629133	0.00742363
MGC69520_Kwon201107_XENLA_00032652	-0.4274	6.89113	11.6822	0.000631	0.00744145
HIP1_Quigley201112_XENLA_00093860	-1.32817	0.351769	11.6782	0.000632366	0.00745335
PLEKHG1_Kwon201107_XENLA_00006289	-0.684631	3.00441	11.6724	0.000634337	0.00746684
NM_001086925.1	0.654741	3.32068	11.6718	0.000634556	0.00746684
C14ORF43_Taira201203_XENLA_stage_00012374	-0.658177	4.06201	11.6717	0.000634585	0.00746684
AF173940.1	-0.654186	4.19899	11.6673	0.00063609	0.00748033
NM_001086169.1	-0.82012	1.99038	11.657	0.000639602	0.00751739
INSM1_Ismailoglu201203_XENLA_00016955	0.683863	3.55476	11.6543	0.000640527	0.00752403
SST_Amin201106_XENLA_00067252	1.71891	0.404817	11.6486	0.000642523	0.00754323
NM_001088235.1	-0.409239	7.02648	11.6467	0.000643182	0.00754504
NM_001094001.1	0.571109	4.01419	11.646	0.0006434	0.00754504
SUV420H1_Taira201203_XENLA_tissue_00221514	-0.522763	4.53869	11.642	0.000644779	0.00754957
LOC100145274_Quigley201207_XENLA_00113288	0.459336	7.25221	11.6418	0.000644878	0.00754957
SHROOM1_Kwon201107_XENLA_00037636	0.436059	5.5344	11.6408	0.000645219	0.00754957
NA_Park201106_XENLA_00013973	-0.506368	4.88036	11.6407	0.000645248	0.00754957
NA_TC421175	0.443269	5.43045	11.6397	0.000645596	0.00754957
PHLDB1_Taira201203_XENLA_tissue_00200637	-0.436621	5.83536	11.6242	0.000650978	0.00760823
NM_001090578.1	-0.388172	8.75653	11.605	0.000657733	0.00768288
BC106488.1	-0.634743	3.48177	11.6009	0.00065921	0.00769583
ZFPM1_Taira201203_XENLA_stage_00192680	-1.2874	0.547696	11.5905	0.000662881	0.00773435
NUDT4_XeXenL6RMv10013159m	-0.410886	5.87765	11.5785	0.00066719	0.00777675
PDE4C_Taira201203_XENLA_stage_00084106	-0.938668	2.51135	11.5783	0.000667261	0.00777675
BC077761.1	0.39741	7.19662	11.5731	0.000669136	0.00779426
BHLHE40_Taira201203_XENLA_tissue_00019254	-0.981361	1.49614	11.5642	0.000672321	0.00782699
XEPSIN_Taira201203_XENLA_stage_00061520	0.851304	2.81143	11.5579	0.000674624	0.00784941
POLD2_Ismailoglu201203_XENLA_00046427	0.480154	5.82811	11.5536	0.000676175	0.00785938
MST1R_Taira201203_XENLA_tissue_00266232	-0.737534	3.20486	11.5535	0.000676234	0.00785938
AY289207.1	-2.03337	0.167086	11.5444	0.00067954	0.00789341
BC044281.1	0.635754	3.41684	11.5357	0.000682728	0.00792603
HNF1B_TC445330	-0.573047	4.61161	11.515	0.000690385	0.00801047
NM_001092934.1	0.478179	5.02926	11.5074	0.000693185	0.00803848
NM_001172195.1	1.74981	-0.339999	11.5056	0.000693857	0.0080418
TMEM169_XeXenL6RMv10045782m	-0.835007	2.52379	11.5014	0.000695423	0.00805548
NM_001096803.1	-0.70137	3.28532	11.4925	0.000698769	0.00808975
EPHA2_TeperekTkacz201206_XENLA_00092816	-0.427379	5.82158	11.4838	0.00070204	0.0081231
NM_001092379.1	0.424401	5.82792	11.4808	0.00070317	0.00813167
TWISTNB_TeperekTkacz201202_XENLA_00093008	0.719564	3.14038	11.4789	0.000703905	0.00813566
SLC13A3_Taira201203_XENLA_stage_00156612	-0.524801	4.75074	11.4751	0.000705359	0.00814795
NM_001092698.1	0.514596	6.0711	11.4739	0.000705789	0.0081484
SAP130_Taira201203_XENLA_stage_00000477	0.514683	4.99926	11.4725	0.000706351	0.00815039
NOTCH2_Taira201203_XENLA_stage_00011576	-0.755155	2.56669	11.4512	0.000714468	0.00823949
SEMA3F_XeXenL6RMv10048727m	-0.439641	5.81232	11.4456	0.000716623	0.00825977
SMEK2_XeXenL6RMv10008742m	0.340426	7.84678	11.443	0.000717629	0.0082668
ATP13A4_Taira201203_XENLA_stage_00193620	-1.0313	2.98863	11.4407	0.000718533	0.00827264
NRIP1_XeXenL6RMv10037491m	0.732815	3.01966	11.4344	0.000720971	0.00829614
AXL_XeXenL6RMv10033084m	-0.844644	1.96482	11.4301	0.000722633	0.00831068
RBM6_Quigley201207_XENLA_00117327	-0.387153	7.22492	11.4267	0.000723954	0.00832128
NCKAP1_mgEST_Xl4jul2012_1013088337	-0.367954	7.10527	11.4245	0.000724812	0.00832627
AF090829.1	0.504562	4.75759	11.423	0.000725412	0.00832627
CADM1_Audic201207_XENLA_00006807	0.494507	4.94373	11.4225	0.000725586	0.00832627
KIAA0232_Taira201203_XENLA_tissue_00024667	-0.370479	7.4974	11.4168	0.000727824	0.00834473
GSTO1_Kwon201107_XENLA_00091867	-0.847512	2.43003	11.4164	0.000727994	0.00834473
AACS_XeXenL6RMv10014863m	-0.934368	1.56769	11.4089	0.000730913	0.0083736
LOXL1_Ismailoglu201203_XENLA_00046036	-0.575337	3.98796	11.3991	0.000734812	0.00841364
NM_001093288.1	0.382225	6.26599	11.391	0.000737992	0.00844541
SNX12_Quigley201207_XENLA_00120637	0.368096	6.81739	11.3819	0.000741642	0.00848135
NM_001091165.1	-0.679815	3.33569	11.3811	0.000741945	0.00848135
GCM1_Taira201203_XENLA_stage_00024582	-1.02376	1.21686	11.3663	0.000747889	0.00854461
ARHGAP4_Taira201203_XENLA_tissue_00012118	-0.60859	4.20829	11.3631	0.000749162	0.00855447
PIK3C2A_Quigley201207_XENLA_00103601	0.387862	6.84545	11.3604	0.000750261	0.00856233
RAD54L2_XeXenL6RMv10048710m	0.567452	4.1854	11.3552	0.000752366	0.00858166
HYDIN_Quigley201112_XENLA_00107095	-0.764859	2.38311	11.3532	0.000753162	0.00858605
STX8_Taira201203_XENLA_tissue_00265256	-0.597315	3.77376	11.3502	0.000754412	0.0085956
SLC43A2_Chung201110_XENLA_00084103	-1.13938	0.833739	11.3421	0.000757706	0.00862178
SNX30_Taira201203_XENLA_tissue_00138273	0.726868	4.1167	11.3405	0.00075833	0.00862178
PLEKHO1_Taira201203_XENLA_stage_00123081	-0.711626	5.32318	11.3405	0.000758362	0.00862178
NA_Taira201203_XENLA_tissue_00247687	-1.30676	0.777924	11.3405	0.000758363	0.00862178
FBXO32_XeXenL6RMv10007767m	-1.33717	0.233579	11.3315	0.000762054	0.00865902
JMJD1C_Taira201203_XENLA_stage_00207735	-0.389217	6.27013	11.3222	0.000765855	0.00869748
PRSS36_TeperekTkacz201206_XENLA_00109064	-1.13236	0.956612	11.3196	0.000766925	0.00870489
ALG2_Audic201207_XENLA_00001739	-0.494446	5.14955	11.3182	0.000767524	0.00870696
SERPINB10_Taira201203_XENLA_tissue_00261973	-1.69201	-0.169655	11.3133	0.000769549	0.00872518
CBLL1_Taira201203_XENLA_stage_00155887	0.395566	6.09182	11.3071	0.000772119	0.00874956
ETAA1_XeXenL6RMv10022008m	-0.484943	5.35587	11.3026	0.000773969	0.00876514
NLRC4_Taira201203_XENLA_stage_00044876	-0.519557	5.42386	11.3018	0.000774334	0.00876514
HLA-DRB1_TC421244	-0.80641	2.02254	11.2706	0.000787443	0.00890869
NM_001091083.1	-0.760511	2.74265	11.268	0.000788564	0.00891654
VSX2_Taira201203_XENLA_tissue_00066871	-0.780352	2.29897	11.2475	0.000797286	0.00900663
NM_001095538.1	0.739285	3.03427	11.2473	0.000797395	0.00900663
ACER2_Taira201203_XENLA_tissue_00213557	-0.468778	5.05317	11.2449	0.000798402	0.00901313
TOX3_Taira201203_XENLA_stage_00182408	0.741193	2.71738	11.2407	0.000800211	0.00902867
RAB33B_TC422019	0.686555	2.90768	11.2391	0.000800917	0.00903175
KDM6A_XeXenL6RMv10018309m	0.553833	4.31874	11.2321	0.000803938	0.00905433
FAM171A1_Taira201203_XENLA_tissue_00135792	0.42731	5.91665	11.2316	0.000804182	0.00905433
NA_Amin201106_XENLA_00065629	-0.610792	4.58422	11.2315	0.000804221	0.00905433
ANKRD28_XeXenL6RMv10037511m	0.710443	2.89378	11.2241	0.000807418	0.00908542
NA_Chung201110_XENLA_00019056	-1.49313	1.04166	11.2142	0.000811719	0.00912651
NM_001086630.1	-0.439029	5.44173	11.2128	0.000812369	0.00912651
CDH11_Taira201203_XENLA_stage_00110415	-0.868602	2.78919	11.2127	0.000812383	0.00912651
ADCY8_Taira201203_XENLA_tissue_00007243	1.07755	1.07695	11.2104	0.0008134	0.00913302
EDEM3_TC413714	0.593487	3.72969	11.1959	0.000819764	0.00919952
USP9X_Taira201203_XENLA_tissue_00152170	-0.460763	5.3394	11.193	0.000821074	0.00920928
HIF1AN_Taira201203_XENLA_stage_00022811	0.588612	3.95926	11.1894	0.000822665	0.00922216
FAM46A_XeXenL6RMv10039416m	-0.985007	1.96587	11.1872	0.000823629	0.009228
NA_XeXenL6RMv10041857m	-1.26839	0.503338	11.1822	0.00082586	0.00924803
NM_001089101.1	1.97423	0.514921	11.1764	0.000828459	0.00927216
HERC6_XeXenL6RMv10002209m	-0.679828	3.11814	11.1718	0.000830504	0.00929007
MYH7_XeXenL6RMv10048196m	-1.03192	1.0716	11.161	0.000835364	0.00933943
CDK2_TC444842	0.632929	3.66644	11.1569	0.000837182	0.00935473
THAP11_Taira201203_XENLA_stage_00043906	0.955222	1.36025	11.1407	0.000844529	0.00943178
NM_001086788.1	-0.419925	5.89135	11.1358	0.000846791	0.00945199
FGD1_TeperekTkacz201206_XENLA_00121666	-0.667391	3.16833	11.1338	0.000847666	0.00945669
BC074217.1	-0.604166	4.14266	11.1211	0.000853489	0.00951512
BC122515.1	0.752098	2.64715	11.1204	0.000853815	0.00951512
NM_001091062.1	-0.363522	8.02855	11.105	0.000860966	0.00958968
SHOX2_Taira201203_XENLA_tissue_00183319	-1.32759	0.313451	11.1023	0.000862219	0.00959851
ELF2_Audic201207_XENLA_00005450	0.484069	4.76139	11.0937	0.000866217	0.00963788
BC123263.1	1.48493	0.760091	11.091	0.000867486	0.00964685
RNF130_Taira201203_XENLA_tissue_00248133	-0.84083	1.93295	11.0892	0.000868325	0.00965104
NA_Kwon201107_XENLA_00107063	0.473677	5.07793	11.0861	0.000869776	0.00966202
NEO1_Taira201203_XENLA_stage_00072461	0.44787	5.415	11.0752	0.000874923	0.00971402
C8ORF48_Ismailoglu201203_XENLA_00027829	-0.583405	4.30743	11.0669	0.000878839	0.00975231
LGALS4_Ismailoglu201203_XENLA_00067737	-0.99422	1.3181	11.06	0.000882087	0.00978314
MARCKSL1_TeperekTkacz201202_XENLA_00040316	-0.799438	2.02694	11.057	0.00088351	0.00979372
EYA1_Park201106_XENLA_00140098	0.736687	3.18001	11.0487	0.000887473	0.00983242
VGLL4_Quigley201207_XENLA_00119215	-0.364836	6.63256	11.0472	0.000888194	0.00983519
PARG_XeXenL6RMv10037669m	0.717281	3.8437	11.0434	0.000890048	0.00984849
CDAN1_TeperekTkacz201206_XENLA_00038913	1.16402	1.05556	11.0428	0.000890339	0.00984849
COX8A_Amin201106_XENLA_00091514	-2.08005	0.686205	11.0391	0.000892103	0.00986277
MLXIP_Taira201203_XENLA_tissue_00028348	0.473333	5.14157	11.0362	0.000893518	0.00987318
NM_001096403.1	-0.4655	5.04678	11.0326	0.000895234	0.00988203
NM_001095563.1	-0.376885	6.76007	11.0325	0.000895266	0.00988203
NA_Quigley201112_XENLA_00079822	-2.38791	-0.645705	11.0212	0.000900782	0.00993766
NM_001091950.1	0.496936	4.49272	11.017	0.000902795	0.0099546
COBLL1_Taira201203_XENLA_tissue_00091189	-0.821225	2.59498	11.0148	0.000903887	0.00996138
SIRT3_Amin201106_XENLA_00031796	-1.54195	-0.411085	11.0079	0.000907262	0.0099933
CABLES2_Kwon201107_XENLA_00032193	-0.490649	4.87413	11.0055	0.000908437	0.010001
BC077764.1	0.370452	6.61477	11.0014	0.000910415	0.0100174
PTPN12_TC415501	0.468766	4.83114	10.9971	0.000912562	0.0100341
AHNAK_TeperekTkacz201206_XENLA_00076230	-0.576083	4.81732	10.9964	0.000912888	0.0100341
TJAP1_TeperekTkacz201202_XENLA_00065555	0.777436	2.38394	10.9867	0.000917677	0.0100814
VENTX1.2_XeXenL6RMv10032769m	-0.666549	3.11623	10.9815	0.000920237	0.0101007
F7CFV6_XENTR_Taira201203_XENLA_tissue_00081547	0.625059	3.78465	10.9812	0.0009204	0.0101007
TMEM39B_TeperekTkacz201206_XENLA_00056987	0.568365	4.2288	10.9774	0.000922284	0.010116
MAP2K1_XeXenL6RMv10004010m	-0.361406	6.96369	10.9756	0.00092318	0.0101205
ANAPC7_Ismailoglu201203_XENLA_00049513	0.601435	4.08366	10.9596	0.00093122	0.0102033
KDM6A_Taira201203_XENLA_tissue_00095614	0.692029	2.88103	10.9421	0.000940059	0.0102948
DENND2A_XeXenL6RMv10046866m	-0.944771	1.43637	10.9381	0.000942058	0.0103066
METTL19_Ismailoglu201203_XENLA_00056016	0.507181	4.89389	10.938	0.000942132	0.0103066
FOXA4_TeperekTkacz201206_XENLA_00087748	-0.357745	8.04395	10.9355	0.000943414	0.0103153
HSPH1_XeXenL6RMv10006805m	0.439355	5.93798	10.9336	0.000944364	0.0103202
NM_001087403.1	0.463241	5.13294	10.9141	0.00095436	0.010424
F7CFV6_XENTR_XeXenL6RMv10025218m	0.656531	3.50382	10.9129	0.000954965	0.0104252
KLHL8_Audic201207_XENLA_00007564	-0.641413	3.38715	10.9079	0.00095756	0.010448
BC054296.1	-1.11126	0.687218	10.9049	0.000959126	0.0104596
PIAS1_XeXenL6RMv10004025m	0.728507	2.68978	10.8867	0.000968591	0.0105573
NM_001097966.1	-0.531849	4.29673	10.8839	0.000970018	0.0105674
KLF2_Taira201203_XENLA_stage_00111429	0.44581	5.28725	10.8813	0.000971401	0.0105769
POST_XeXenL6RMv10029460m	-0.444908	8.67383	10.8655	0.00097974	0.0106622
NM_001088164.1	-0.358032	7.66388	10.8603	0.000982456	0.0106861
PAWR_Kwon201107_XENLA_00069834	-0.359339	6.80358	10.8558	0.000984845	0.0107065
TTC26_Taira201203_XENLA_tissue_00238815	0.53701	4.32012	10.849	0.000988473	0.0107404
CDK7_Quigley201112_XENLA_00104810	0.547601	4.36556	10.8474	0.000989331	0.0107441
BC079723.1	0.41482	6.15766	10.8451	0.000990596	0.0107509
DPYSL5_Taira201203_XENLA_stage_00087308	-1.62223	0.347397	10.8443	0.000990994	0.0107509
ZC3H12A_Taira201203_XENLA_tissue_00062029	-1.08093	1.49171	10.8434	0.000991499	0.0107509
FRAS1_Taira201203_XENLA_tissue_00122143	-1.32077	0.20328	10.8399	0.00099337	0.0107655
NA_Kwon201107_XENLA_00018103	-0.582856	3.9312	10.8387	0.000993986	0.0107666
FES_XeXenL6RMv10011476m	-1.62785	-0.134228	10.8357	0.000995639	0.0107789
C20ORF151_XeXenL6RMv10030628m	-1.15679	1.19654	10.8277	0.000999902	0.0108195
BC086465.1	-0.397706	6.91423	10.8183	0.00100501	0.0108691
NM_001085987.1	0.568152	5.42122	10.8169	0.00100576	0.0108716
POLR2I_Taira201203_XENLA_tissue_00263695	0.501442	5.15083	10.8146	0.00100701	0.0108795
AY100020.1	-0.947057	1.39637	10.7872	0.00102202	0.0110359
RBM33_Taira201203_XENLA_tissue_00291124	-0.382343	6.77267	10.781	0.00102546	0.0110673
BC133742.1	-1.12487	0.888606	10.7787	0.00102675	0.0110755
BC077368.1	-0.620789	3.45295	10.773	0.00102992	0.0111039
GALNTL1_TC415558	1.26473	0.858855	10.772	0.00103045	0.0111039
SOX11_XeXenL6RMv10055264m	0.53485	4.88866	10.7589	0.00103777	0.0111771
NM_001090297.1	-0.528867	4.48637	10.7576	0.0010385	0.0111792
SPSB1_XeXenL6RMv10050636m	0.615205	3.44102	10.7464	0.00104484	0.0112416
C12ORF45_Taira201203_XENLA_tissue_00115817	0.483911	4.98784	10.7444	0.00104596	0.0112479
DPYSL2_Quigley201207_XENLA_00078248	0.490551	5.97021	10.7342	0.00105172	0.011304
CGNL1_Ismailoglu201203_XENLA_00052848	0.631499	4.57861	10.7306	0.00105379	0.011318
NP_001107353.1_Taira201203_XENLA_stage_00080717	-0.713707	2.91792	10.73	0.00105412	0.011318
AF027183.1	0.612513	3.39761	10.7261	0.00105636	0.0113363
IL4I1_Taira201203_XENLA_tissue_00157491	-1.25557	0.348211	10.7161	0.00106208	0.0113918
SRGAP1_Ismailoglu201203_XENLA_00009552	0.686704	2.73291	10.7038	0.00106914	0.0114617
NA_Taira201203_XENLA_tissue_00189208	-1.18485	1.08649	10.6999	0.0010714	0.01148
USP49_Ismailoglu201203_XENLA_00063910	0.505071	5.25868	10.6979	0.00107255	0.0114864
WIPI1_TC461883	-0.537934	4.65364	10.6931	0.00107537	0.0115104
NM_001091652.1	-0.477515	5.9789	10.6922	0.0010759	0.0115104
SEMA4D_Ismailoglu201203_XENLA_00036060	0.586436	3.63083	10.6885	0.00107804	0.0115274
NA_XeXenL6RMv10054880m	0.488988	5.51434	10.683	0.00108126	0.011556
NRD1_XeXenL6RMv10008665m	-0.764653	2.38451	10.6725	0.0010874	0.0116097
U09632.1	-0.802287	2.51658	10.6712	0.00108815	0.0116097
NM_001091172.1	0.495681	4.8068	10.6708	0.00108838	0.0116097
TFAP2C_Ismailoglu201203_XENLA_00048065	0.523406	4.58903	10.6706	0.00108851	0.0116097
CLCN2_Taira201203_XENLA_tissue_00222616	-1.96882	-1.10455	10.6683	0.00108988	0.0116184
BC153798.1	-1.96269	-0.564549	10.6659	0.00109127	0.0116227
LRP6_XeXenL6RMv10013494m	0.435497	5.5915	10.6657	0.0010914	0.0116227
UBL3_TC419160	0.791337	2.82938	10.6584	0.00109574	0.0116629
GALNTL4_Amin201106_XENLA_00025601	-1.0251	1.31968	10.6563	0.00109698	0.0116682
HTRA3__TeperekTkacz201202_XENLA_00152299	0.891297	1.73112	10.6556	0.00109736	0.0116682
NM_001097135.1	-0.725539	2.90077	10.6481	0.00110182	0.0117097
NA_Taira201203_XENLA_tissue_00104256	0.345374	7.82489	10.6462	0.00110298	0.0117145
LIN9_Ismailoglu201203_XENLA_00019645	0.484455	5.25293	10.6455	0.0011034	0.0117145
NM_001094788.1	-0.944944	2.35769	10.644	0.00110431	0.0117182
TMSB4X_mgEST_Xl4jul2012_1013085733	-0.315424	8.34268	10.6417	0.00110567	0.0117268
CCNB1_TC446757	0.973008	5.12834	10.6367	0.00110868	0.0117527
IDH2_XeXenL6RMv10011457m	-0.286505	10.0411	10.6327	0.00111106	0.011772
SLC2A12_Audic201207_XENLA_00007325	-0.595373	3.57798	10.6258	0.00111522	0.01181
NA_TC430704	0.482906	4.89123	10.6203	0.00111852	0.0118389
NUP133_Kwon201107_XENLA_00094766	0.478372	4.72437	10.6135	0.00112266	0.0118768
PCNA_TC422673	-0.505669	5.39089	10.6118	0.0011237	0.0118817
MYOS_Audic201207_XENLA_00001796	1.59352	0.471297	10.6015	0.00112996	0.0119419
CDK13_Kwon201107_XENLA_00107424	0.381767	6.62378	10.599	0.00113148	0.0119518
NM_001095091.1	-0.82923	1.84803	10.5972	0.00113262	0.0119578
BC073423.1	-0.611645	3.9746	10.5877	0.00113843	0.0120132
BC141766.1	1.68074	4.30156	10.5753	0.00114606	0.0120875
FAM124A_Taira201203_XENLA_tissue_00212149	-1.24271	0.303527	10.5712	0.00114861	0.0121083
NM_001087434.1	0.471365	5.55771	10.5638	0.00115327	0.0121512
BC060749.1	0.505871	4.83176	10.5536	0.00115964	0.0122122
NM_001092204.1	0.836284	2.41792	10.5506	0.0011615	0.0122256
BC169885.1	-0.586736	4.79694	10.5447	0.00116523	0.0122587
MCL1_Taira201203_XENLA_tissue_00025959	-0.454767	7.63275	10.5331	0.00117254	0.0123294
NM_001096910.1	-0.830672	2.71071	10.5289	0.00117519	0.0123511
CEP120_TeperekTkacz201202_XENLA_00103536	0.521846	5.46061	10.5239	0.00117839	0.0123782
PLXND1_XeXenL6RMv10010077m	-0.896244	1.70203	10.523	0.00117896	0.0123782
FLRT2_Taira201203_XENLA_tissue_00285415	-0.736675	3.02211	10.5164	0.00118318	0.0124162
NA_Taira201203_XENLA_stage_00023161	-0.411022	5.47272	10.4952	0.00119684	0.0125533
RALGDS_Taira201203_XENLA_tissue_00008966	-0.578816	5.11061	10.4766	0.00120896	0.012674
NP_001135539.1_Taira201203_XENLA_tissue_00168067	1.28601	0.0923244	10.4616	0.00121885	0.0127713
NM_001096055.1	0.447395	5.33852	10.457	0.00122184	0.0127962
AATF_Taira201203_XENLA_stage_00209301	-0.349661	6.92567	10.4552	0.00122305	0.0128024
ATP11C_Quigley201112_XENLA_00081351	-0.553025	4.35935	10.4514	0.00122556	0.0128223
DDIT4_Taira201203_XENLA_stage_00198975	-0.364375	6.72998	10.4482	0.00122769	0.0128381
FST_XeXenL6RMv10016283m	-0.927982	1.59502	10.4469	0.00122855	0.0128407
PLEKHA7_Taira201203_XENLA_tissue_00267389	0.581408	3.82337	10.4337	0.00123735	0.0129262
PTP4A3_TC422787	0.669853	2.95968	10.4322	0.00123839	0.0129302
C4ORF49_Audic201207_XENLA_00004880	-0.574422	3.82816	10.4313	0.00123897	0.0129302
[truncated: 796 more rows]
